# Supplementary material for: Overexpression of ELF3 in the PTEN-deficient lung epithelium promotes lung cancer development by inhibiting ferroptosis
Source: PubMed Central journal article supplement (PMC11655876; doi:10.1038/s41419-024-07274-5), 2024-12-18
Supplement: 41419_2024_7274_MOESM2_ESM.pdf [file 41419_2024_7274_MOESM2_ESM.pdf]

| Blank (loading buffer) | H1650 <i>PTEN</i> <sup>null/null</sup> | H1650 <i>PTEN</i> <sup>null/null</sup> <i>ELF3</i> <sup>ov</sup> | Marker | Marker | NL20 WT | NL20 <i>ELF3</i> <sup>ov</sup> | NL20 <i>PTEN</i> <sup>-/-</sup> | NL20 <i>PTEN</i> <sup>-/-</sup> <i>ELF3</i> <sup>ov</sup> | Marker |
|------------------------|----------------------------------------|------------------------------------------------------------------|--------|--------|---------|--------------------------------|---------------------------------|-----------------------------------------------------------|--------|
|                        |                                        |                                                                  |        |        |         |                                |                                 |                                                           |        |

ELF3

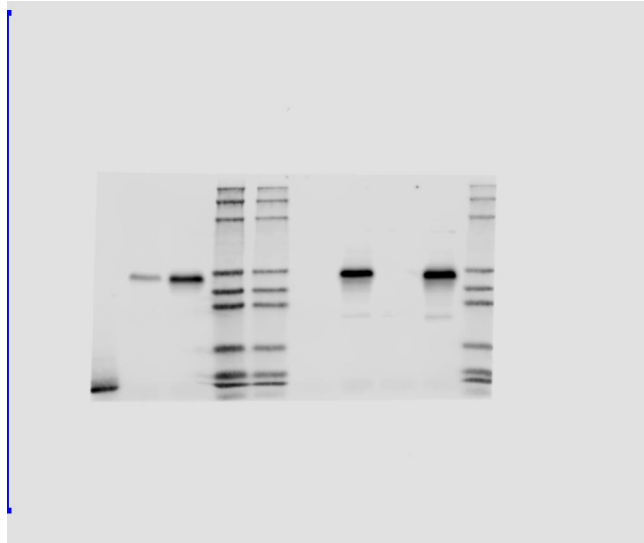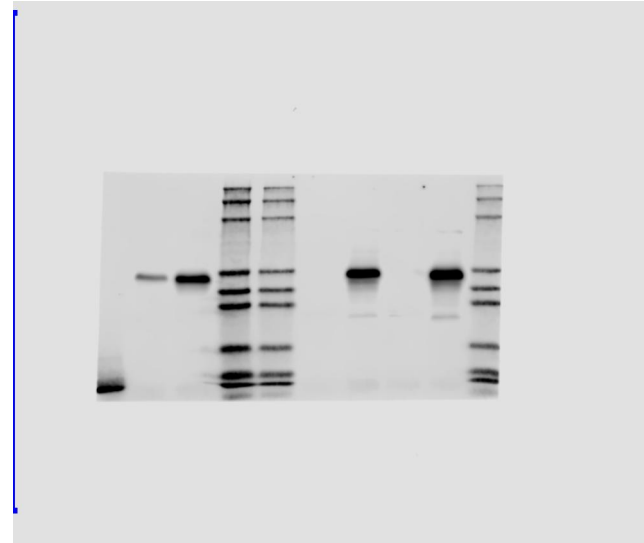

$\beta$ -actin

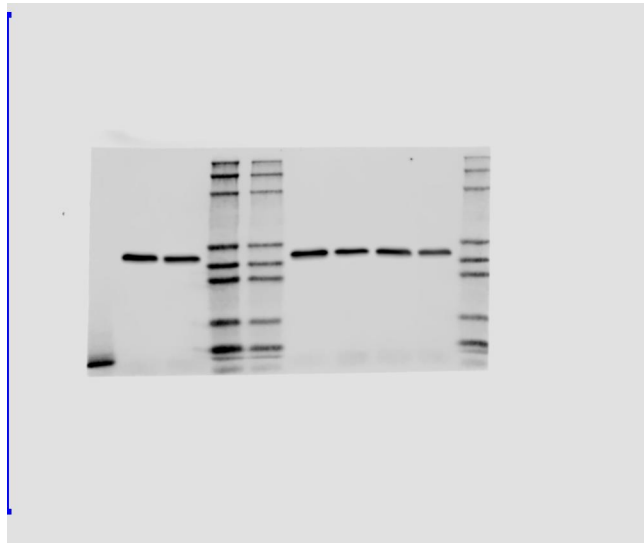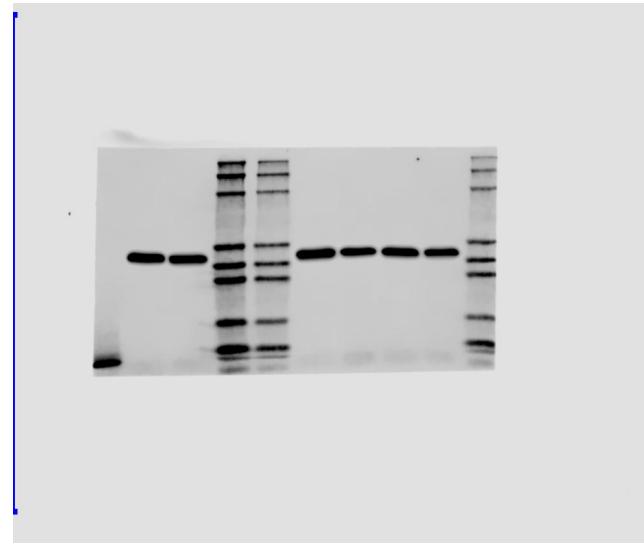

short  
exposure

long  
exposure

| Beas2B WT | Beas2B <i>ELF3</i> <sup>ov</sup> | Beas2B <i>PTEN</i> <sup>-/-</sup> | Beas2B <i>PTEN</i> <sup>-/-</sup> <i>ELF3</i> <sup>ov</sup> | Marker |  |  |
|-----------|----------------------------------|-----------------------------------|-------------------------------------------------------------|--------|--|--|
|           |                                  |                                   |                                                             |        |  |  |

ELF3

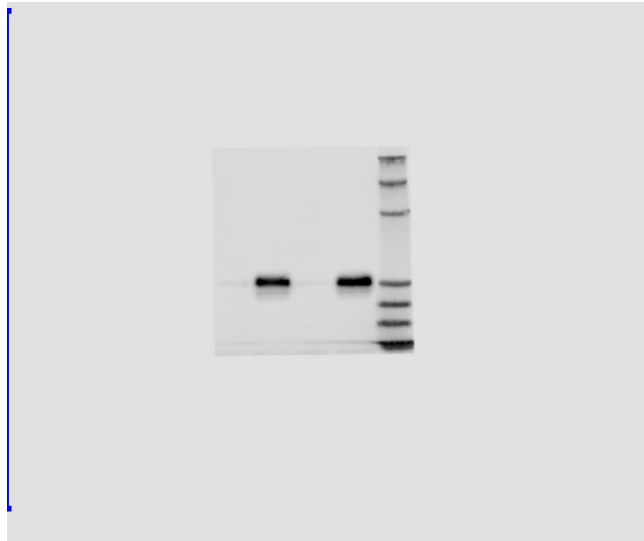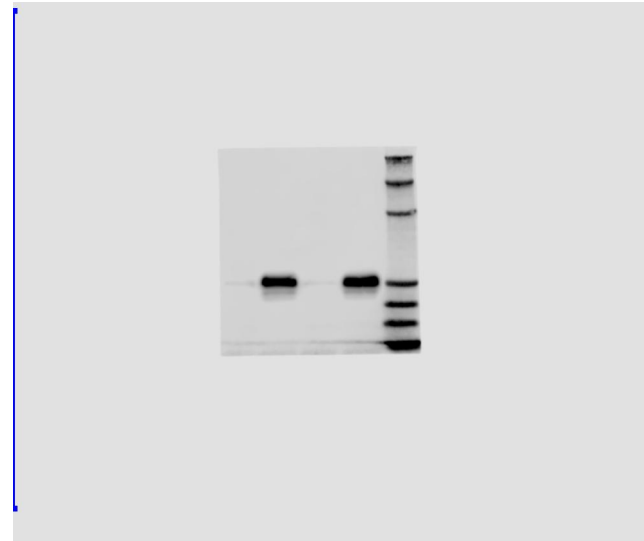

β-actin

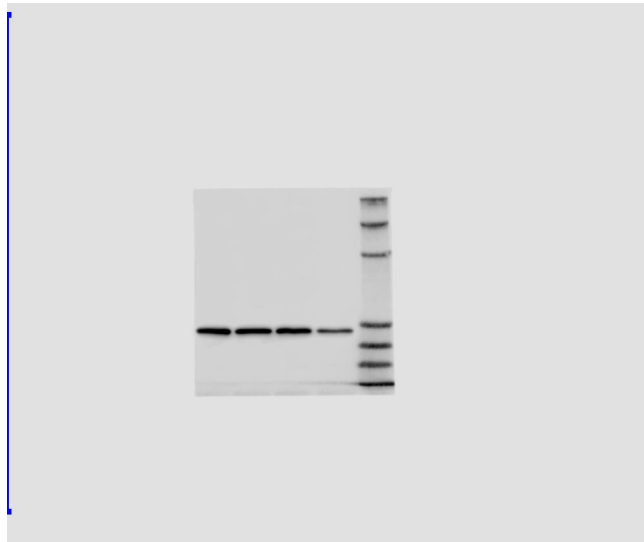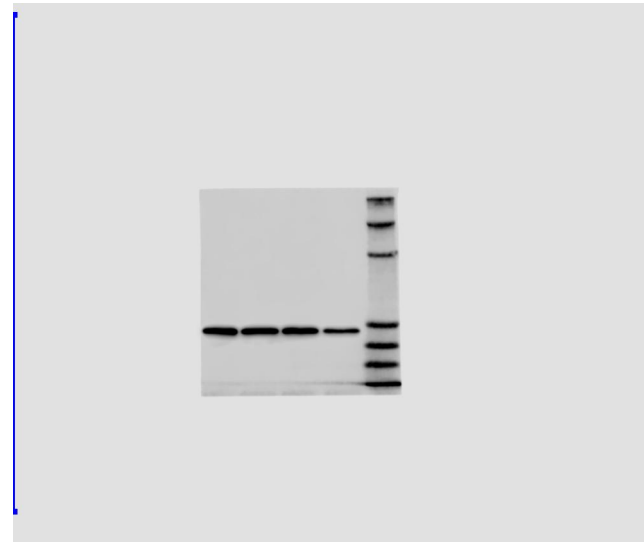

short  
exposure

long  
exposure

| Marker | NL20 WT | NL20 <i>ELF3</i> <sup>ov</sup> | NL20 <i>PTEN</i> <sup>-/-</sup> | NL20 <i>PTEN</i> <sup>-/-</sup> <i>ELF3</i> <sup>ov</sup> | H1650 <i>PTEN</i> <sup>null/null</sup> | H1650 <i>PTEN</i> <sup>null/null</sup> <i>ELF3</i> <sup>ov</sup> | Marker |
|--------|---------|--------------------------------|---------------------------------|-----------------------------------------------------------|----------------------------------------|------------------------------------------------------------------|--------|
|        |         |                                |                                 |                                                           |                                        |                                                                  |        |

PTEN

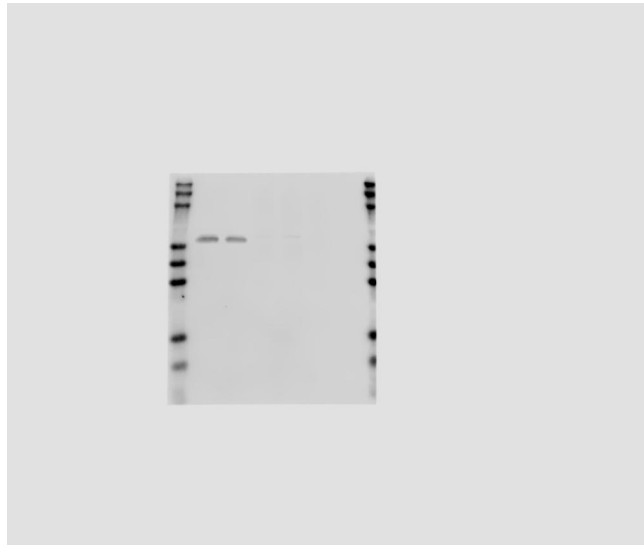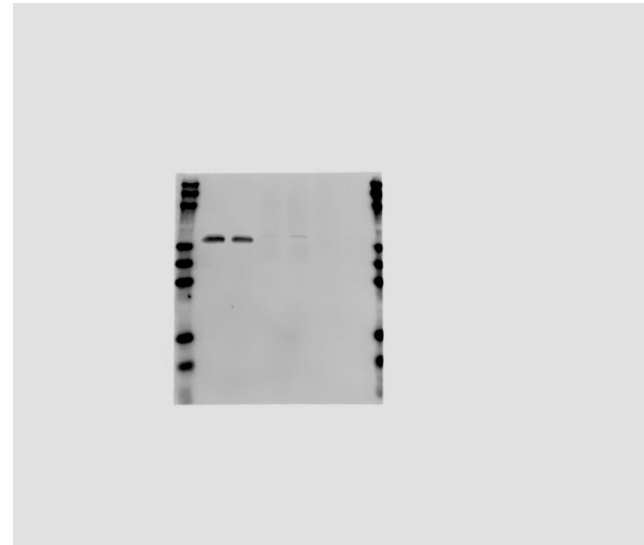

$\beta$ -actin

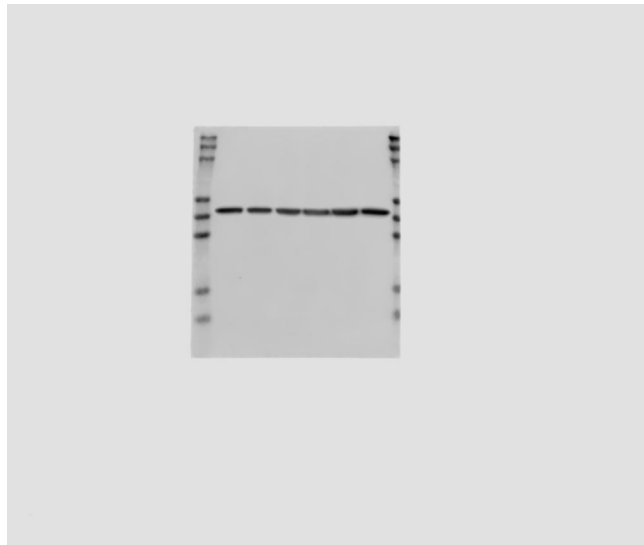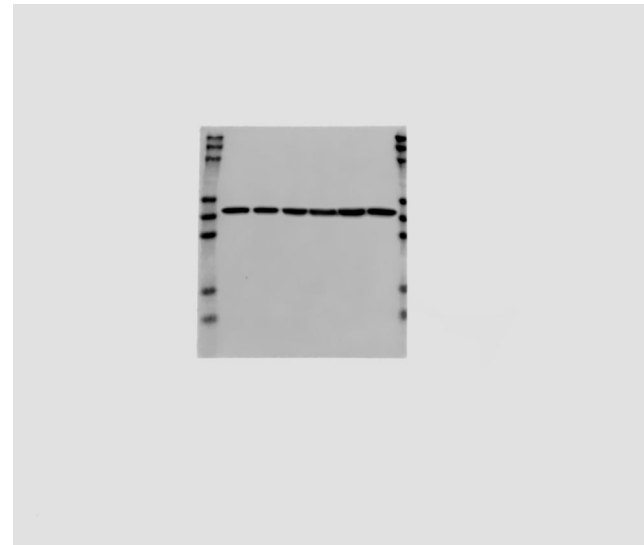

short  
exposure

long  
exposure

| Marker | Beas2B WT | Beas2B <i>ELF3</i> <sup>ov</sup> | Beas2B <i>PTEN</i> <sup>-/-</sup> | Beas2B <i>PTEN</i> <sup>-/-</sup> <i>ELF3</i> <sup>ov</sup> |  |  |  |
|--------|-----------|----------------------------------|-----------------------------------|-------------------------------------------------------------|--|--|--|
|        |           |                                  |                                   |                                                             |  |  |  |

PTEN

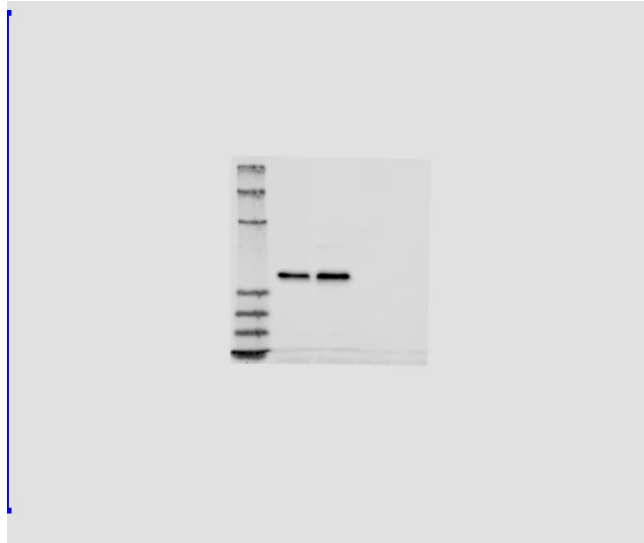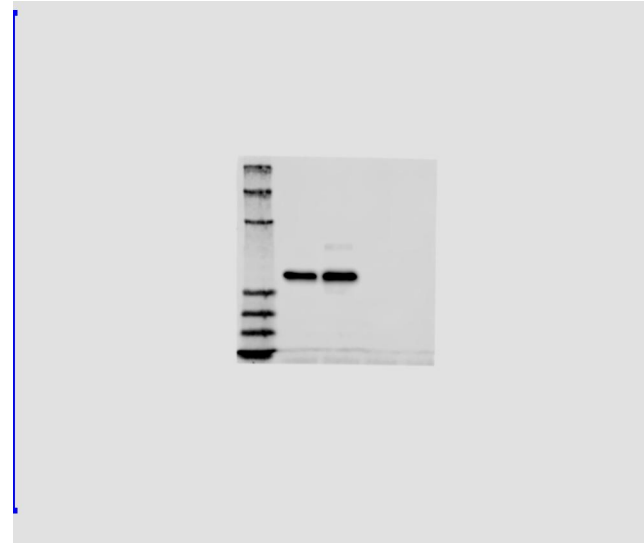

$\beta$ -actin

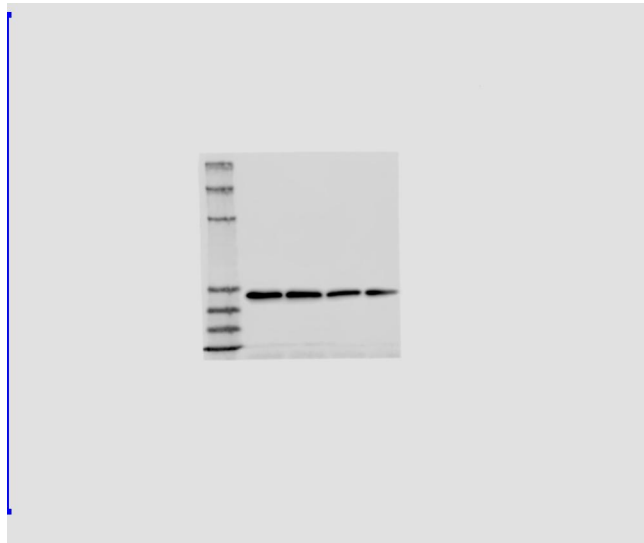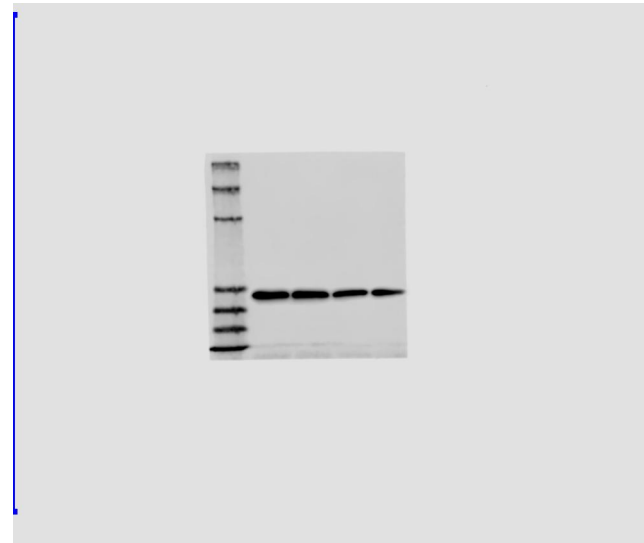

short  
exposure

long  
exposure

| Marker | NL20 WT | NL20 <i>ELF3</i> <sup>ov</sup> | NL20 <i>PTEN</i> <sup>-/-</sup> | NL20 <i>PTEN</i> <sup>-/-</sup> <i>ELF3</i> <sup>ov</sup> | H1650 <i>PTEN</i> <sup>null/null</sup> | H1650 <i>PTEN</i> <sup>null/null</sup> <i>ELF3</i> <sup>ov</sup> | Marker |
|--------|---------|--------------------------------|---------------------------------|-----------------------------------------------------------|----------------------------------------|------------------------------------------------------------------|--------|
|        |         |                                |                                 |                                                           |                                        |                                                                  |        |

SLC7A11

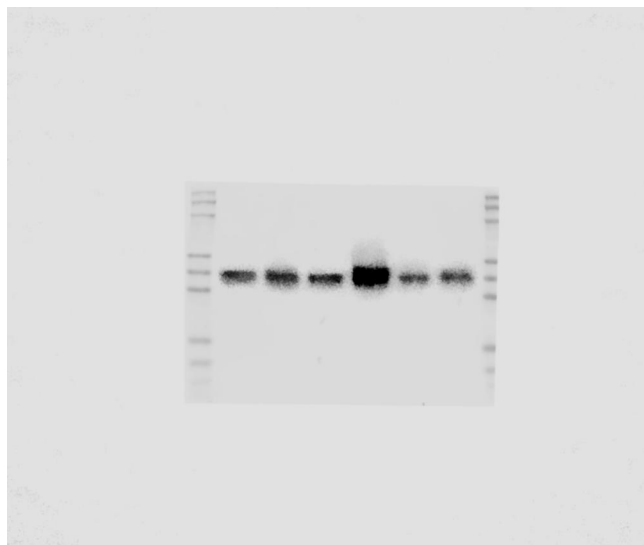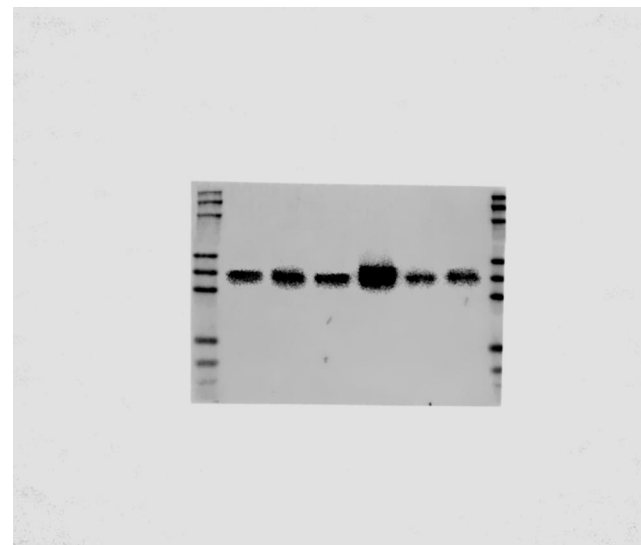

β-actin

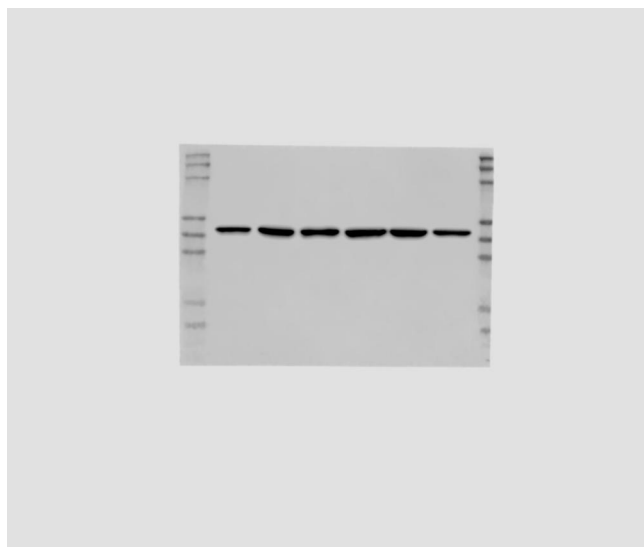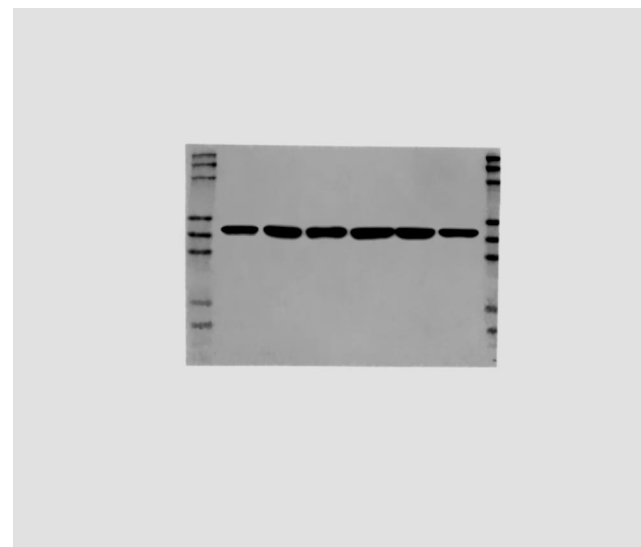

short  
exposure

long  
exposure
