# Supplementary material for: Overexpression of ELF3 in the PTEN-deficient lung epithelium promotes lung cancer development by inhibiting ferroptosis
Source: Cell Death Dis. 2024 Dec 18;15(12):897. doi: 10.1038/s41419-024-07274-5 (PMC11655876; doi:10.1038/s41419-024-07274-5)
Supplement: Supplementary file 1 — Supplementary Figures and Tables [file 41419_2024_7274_MOESM1_ESM.pdf]

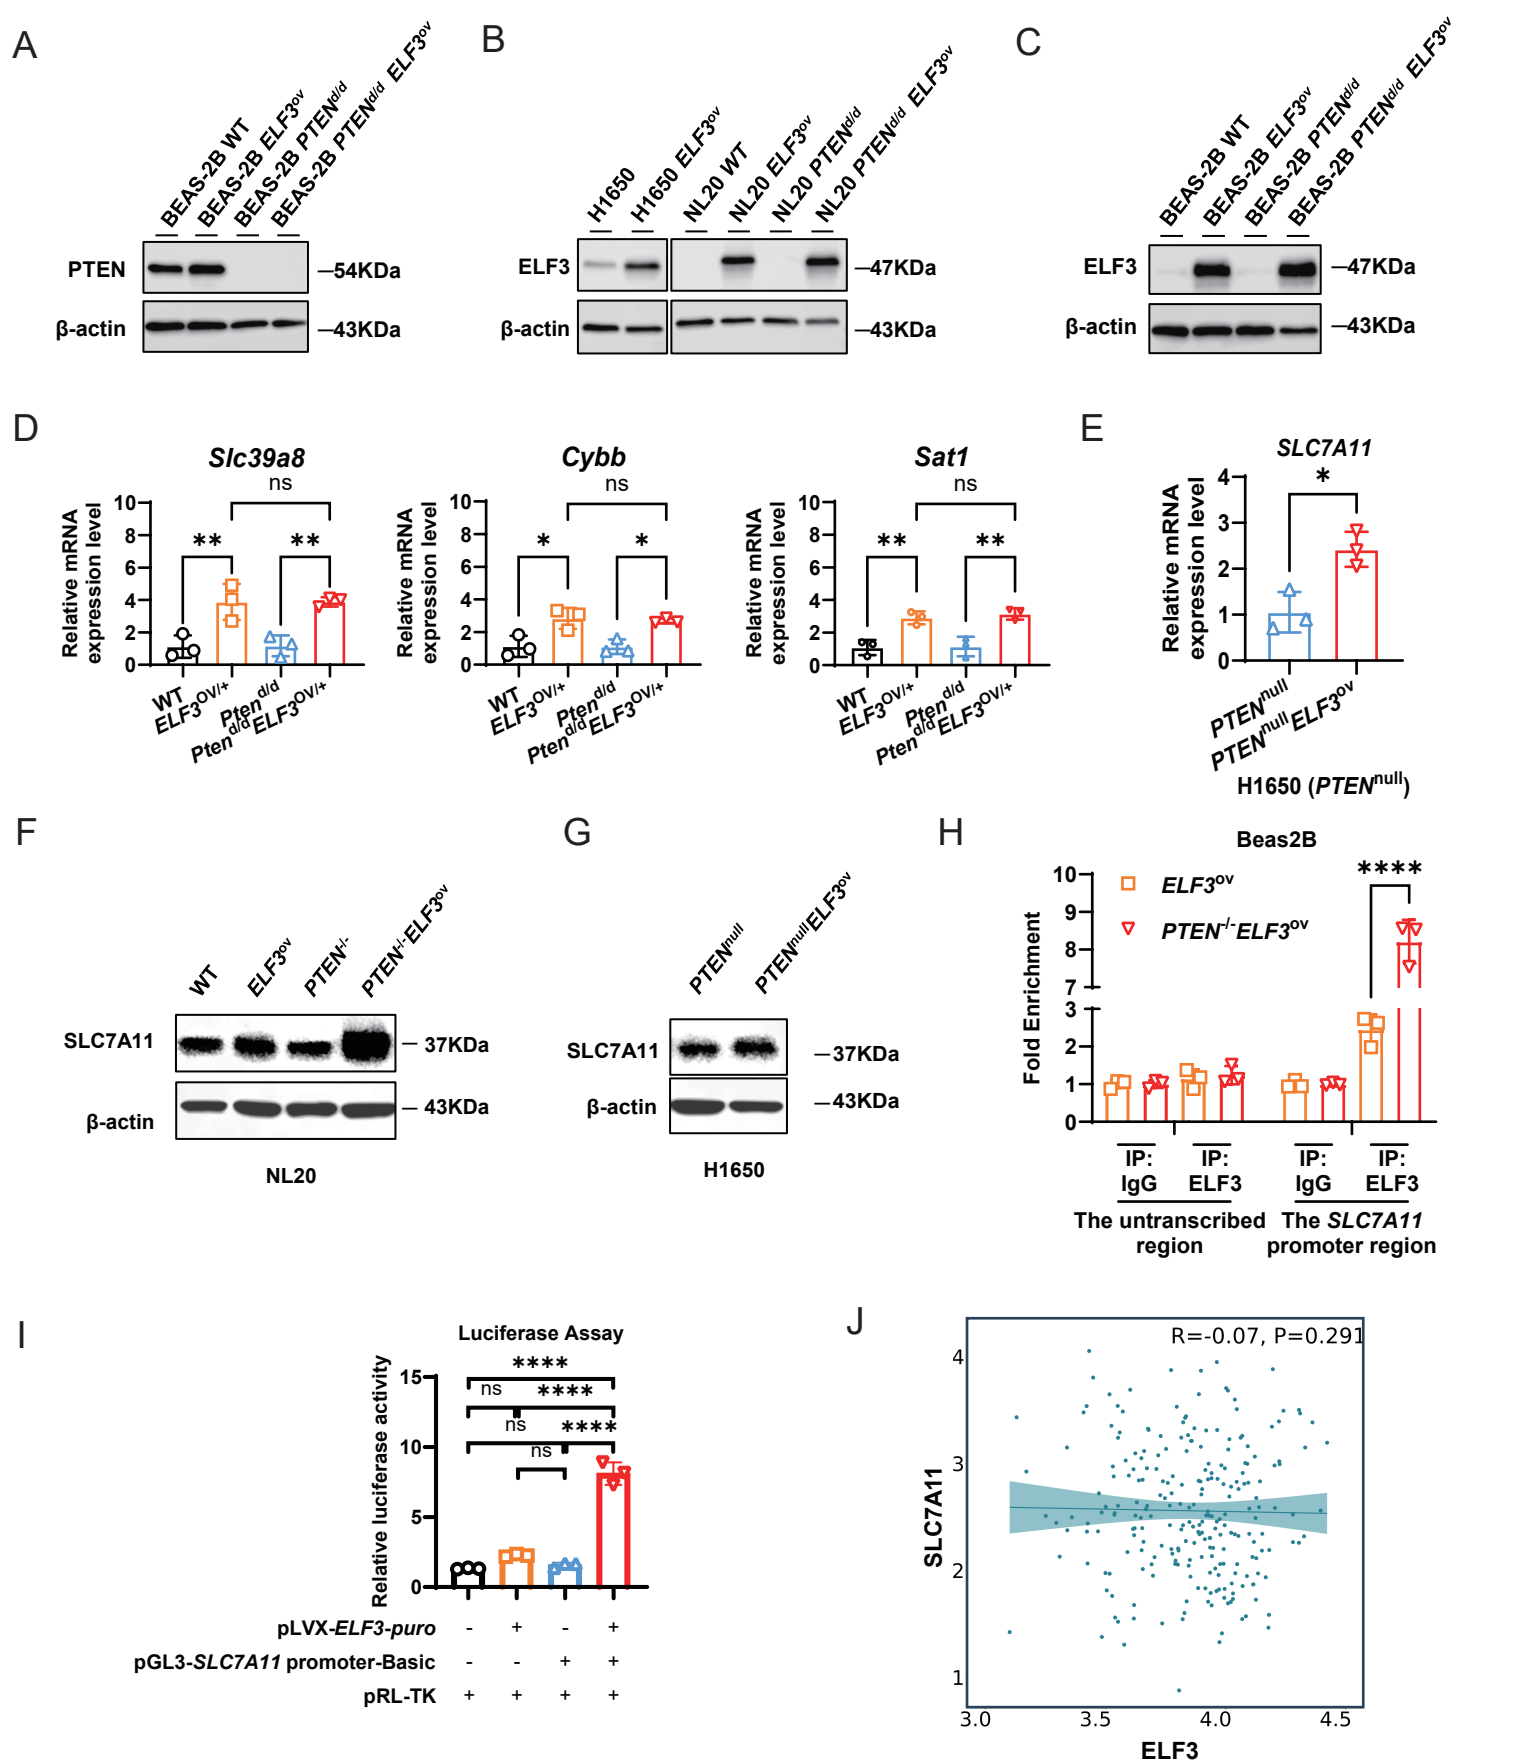

**Supplementary Fig. S1.** (A) PTEN expression in BEAS-2B cell lines detected by WB. (B) ELF3 expression in NL20 and H1650 cell lines detected by WB. (C) ELF3 expression in BEAS-2B cell lines detected by WB. (D) Gene expression levels of *Slc39a8*, *Cybb* and *Sat1* in mouse lung tissue samples detected by RT-qPCR. (E) Gene expression levels of ELF3 in H1650 were detected by RT-qPCR. (F & G) *slc7a11* expression in NL20 and H1650 cell lines detected by WB. (H) ELF3 binding strength on the SLC7A11 promoter region detected by ChIP-qPCR. (I) Luciferase assay detecting the expression of luciferase induced by ELF3 to the SLC7A11 promoter region. (J) The relationship between the expression levels of ELF3 and SLC7A11 in lung cancer patients.

Score = 17110.0  
Length of alignment = 372  
Sequence NP\_031947.1/1-371 (Sequence length = 371)  
Sequence CAG33387.1/1-371 (Sequence length = 371)

NP\_031947.1/1-371 MAATCEISNVFSNYFNAMYSSEDPILAPAPPT-TFGTEDLVLTLNNQQTLEGP  
||||||| . ||||| . ||||| . ||| . || . ||| . ||||| . | || . |||  
CAG33387.1/1-371 MAATCEISNIFSNYFSAMYSSEDSLAVPPAATFGADDLVLTLNHPQMSLEGT

NP\_031947.1/1-371 EEASWTSERPQFWSEIQVLEWISYQVEKNKYDASSIDFSRCDMDGATLCSCALE  
||||| . | . ||||| . ||||| . ||||| . ||||| . ||||| . |||||  
CAG33387.1/1-371 EEASWLGEQPQFWSEIQVLDWISYQVEKNKYDASAIIDFSRCDMDGATLNCAL

NP\_031947.1/1-371 ELRLVFGPLGDQLHAQLRDLTSNSSDELSWIIELLEEDGHSFQESLGDSGPFDQ  
||||||| . ||||| . ||||| . ||||| . ||||| . ||||| . ||||| . |||||  
CAG33387.1/1-371 ELRLVFGPLGDQLHAQLRDLTSSSSDELSWIIELLEEDGMAFQEAL-DGPFPDQ

NP\_031947.1/1-371 GSPFAQELLDDGRQASPYCYSTYCGAPSPGSSDVSTARTATPQSSHASDGGGS  
||||||| . ||||| . . . | . ||||| . ||||| . ||||| . |||||  
CAG33387.1/1-371 GSPFAQELLDDGQQASPYHPGSCGAGAPSPGSSDVSTAGTGASRSSHSSDSGGGS

NP\_031947.1/1-371 DVDLDLTESTEVFPRDGFDPYKEGEPEHGERGRPRELSKEYWDCLEGEKSEHA  
||||| | . | . || ||| | ||| . || ||||| . ||||| . ||||| . |||||  
CAG33387.1/1-371 DVDLDPIDGELFPSDGFDRDCKEGDPKLGKRGGRPRELSKEYWDCLEGEKSEHA

NP\_031947.1/1-371 PRGTHLWEIFRDILIHPELNEGLMKWENRHEGVFEFLRSEAVAQLWGQKKENSH  
||||||| . ||||| . ||||| . ||||| . ||||| . ||||| . ||||| . |||||  
CAG33387.1/1-371 PRGTHLWEIFRDILIHPELNEGLMKWENRHEGVFEFLRSEAVAQLWGQKKENSH

NP\_031947.1/1-371 MTYEELSRAMRYYYEREILERVDRRLVYFGENSSGWEEEEVGESRN  
||||||| . ||||| . ||||| . ||||| . ||||| . ||||| . ||||| . |||||  
CAG33387.1/1-371 MTYEELSRAMRYYYEREILERVDRRLVYFGENSSGWEEEEVLQSRN

Percentage ID = 87.10

**Supplementary Fig. S2.** Alignment result of human and mouse ELF3 amino acid sequence.

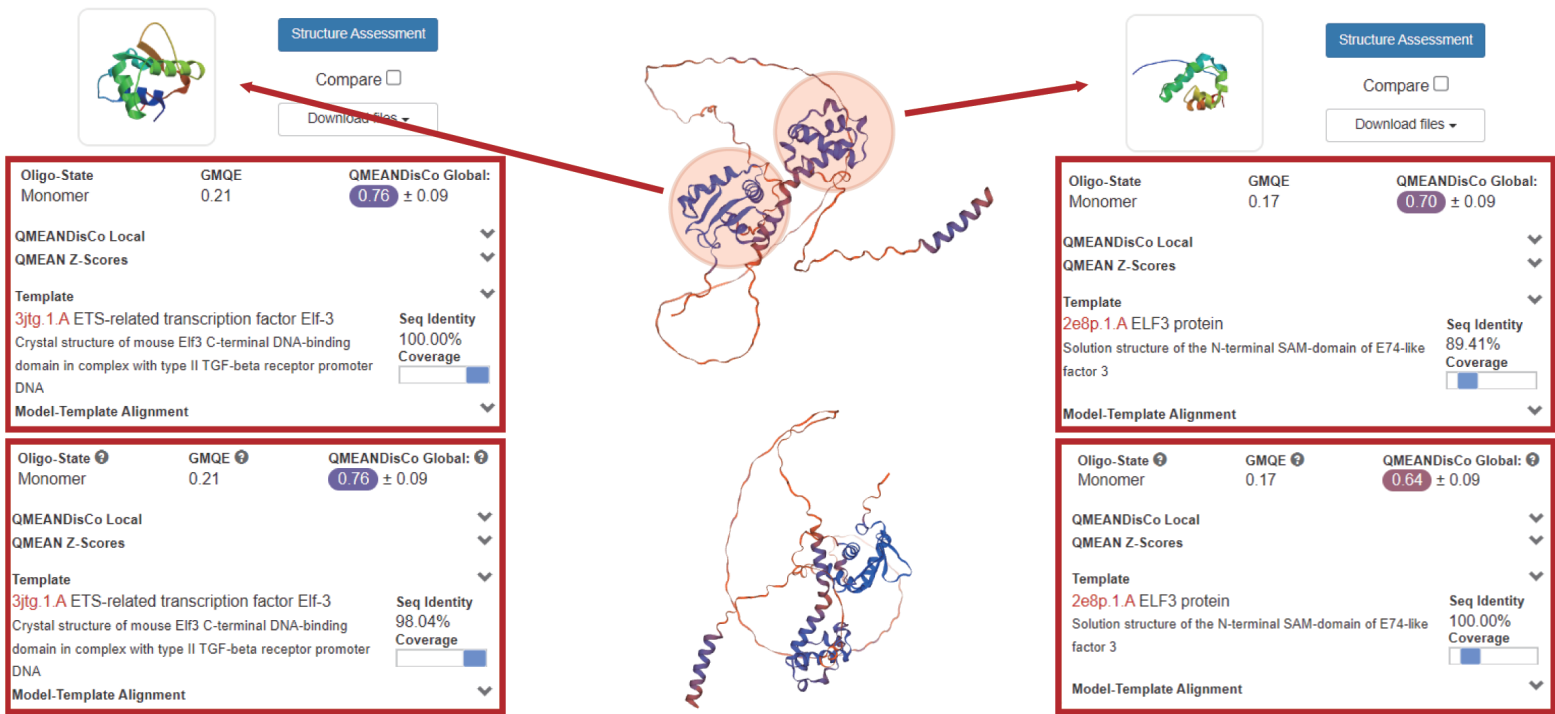

**Supplementary Fig. S3.** Structural and functional comparasion between the hELF3 (human ELF3) and mELF3 (mouse ELF3)

**Supplementary Table 1 DEGs between the ELF3<sup>OV</sup> vs WT groups**

| gene_id  | baseMean | log2FoldC | lfcSE   | stat    | pvalue   | padj     | WT1     | WT2     | WT3     | ELF3OV1 | ELF3OV2 | ELF3OV3 | change |
|----------|----------|-----------|---------|---------|----------|----------|---------|---------|---------|---------|---------|---------|--------|
| Gm6123   | 103.642  | -4.5      | 0.47359 | -9.502  | 2.06E-21 | 2.62E-18 | 152.769 | 293.721 | 149.043 | 6.13035 | 8.91451 | 11.2735 | Down   |
| Rgs20    | 78.37    | -1.3966   | 0.58363 | -2.3929 | 0.01672  | 0.21274  | 72.935  | 122.631 | 145.147 | 32.6952 | 15.848  | 80.9644 | Down   |
| St18     | 19.0981  | 1.21827   | 0.60129 | 2.0261  | 0.04275  | 0.37291  | 18.7266 | 8.90062 | 6.81897 | 32.6952 | 20.8005 | 26.6465 | Up     |
| Tcf24    | 152.408  | -0.491    | 0.21919 | -2.2402 | 0.02508  | 0.27353  | 178.395 | 154.277 | 201.647 | 122.607 | 139.661 | 117.86  | Down   |
| Slco5a1  | 126.151  | -0.7139   | 0.30682 | -2.3266 | 0.01999  | 0.23859  | 184.309 | 169.112 | 116.897 | 90.9336 | 120.841 | 74.8152 | Down   |
| Eya1     | 354.613  | -0.7729   | 0.33819 | -2.2854 | 0.02229  | 0.25495  | 295.683 | 599.309 | 447.13  | 221.714 | 202.062 | 361.778 | Down   |
| Il17a    | 2.88035  | 4.99332   | 2.08748 | 2.39204 | 0.01676  | 0.21309  | 0       | 0       | 0       | 1.02173 | 3.962   | 12.2984 | Up     |
| Mcm3     | 1217.81  | 0.42573   | 0.19172 | 2.22053 | 0.02638  | 0.28094  | 1191.6  | 829.736 | 1096.88 | 1583.67 | 1336.19 | 1268.78 | Up     |
| Gm28438  | 545.982  | -3.9229   | 0.23801 | -16.482 | 4.96E-61 | 1.53E-57 | 879.163 | 1187.74 | 1006.29 | 55.1732 | 60.4206 | 87.1136 | Down   |
| Gm5525   | 171.431  | 0.42848   | 0.1881  | 2.27792 | 0.02273  | 0.25741  | 144.884 | 156.255 | 137.354 | 184.932 | 197.11  | 208.048 | Up     |
| 4931428L | 160.275  | -1.0211   | 0.27583 | -3.7019 | 0.00021  | 0.00987  | 188.251 | 260.096 | 195.802 | 96.0422 | 86.1736 | 135.282 | Down   |
| Rab23    | 1744.59  | -0.3022   | 0.14641 | -2.064  | 0.03902  | 0.3548   | 1764.24 | 2159.88 | 1855.73 | 1499.89 | 1462.97 | 1724.85 | Down   |
| Bag2     | 863.956  | -0.5591   | 0.21343 | -2.6196 | 0.0088   | 0.13938  | 918.587 | 1222.35 | 946.863 | 714.186 | 554.68  | 827.067 | Down   |
| Bend6    | 148.208  | 0.57068   | 0.22988 | 2.48251 | 0.01305  | 0.17905  | 130.1   | 119.664 | 108.129 | 154.281 | 208.996 | 168.078 | Up     |
| Gm3052   | 91.9737  | 0.9803    | 0.28438 | 3.44715 | 0.00057  | 0.02084  | 57.1653 | 55.3817 | 73.0604 | 142.02  | 124.803 | 99.412  | Up     |
| Ccdc115  | 1428.41  | 0.34988   | 0.13883 | 2.52023 | 0.01173  | 0.16717  | 1162.03 | 1245.1  | 1360.87 | 1599    | 1455.05 | 1748.42 | Up     |
| Plekhh2  | 7888.88  | 0.31861   | 0.153   | 2.08243 | 0.0373   | 0.34397  | 7994.27 | 6484.6  | 6585.18 | 8267.8  | 9876.28 | 8125.14 | Up     |
| Lonrf2   | 33.1172  | -1.2161   | 0.61963 | -1.9626 | 0.04969  | 0.39986  | 26.6114 | 83.0725 | 29.2242 | 28.6083 | 16.8385 | 14.3481 | Down   |
| Chst10   | 100.769  | 0.51856   | 0.26367 | 1.96666 | 0.04922  | 0.39755  | 93.6328 | 67.2491 | 87.6725 | 129.759 | 123.813 | 102.487 | Up     |
| Npas2    | 399.893  | -2.0461   | 0.47854 | -4.2758 | 1.90E-05 | 0.0014   | 225.704 | 987.969 | 717.94  | 136.911 | 123.813 | 207.023 | Down   |
| Il1rl1   | 204.274  | 0.61727   | 0.20022 | 3.08297 | 0.00205  | 0.05157  | 167.553 | 160.211 | 155.862 | 281.996 | 210.977 | 249.042 | Up     |
| Slc9a4   | 503.809  | 1.32039   | 0.47988 | 2.75148 | 0.00593  | 0.10748  | 458.308 | 250.206 | 155.862 | 819.424 | 1017.24 | 321.808 | Up     |
| Fhl2     | 793.325  | -2.3668   | 0.4579  | -5.1687 | 2.36E-07 | 3.91E-05 | 700.768 | 2435.8  | 850.423 | 178.802 | 303.093 | 291.062 | Down   |
| Ecrq4    | 51.0656  | -0.8062   | 0.4015  | -2.0079 | 0.04466  | 0.37936  | 55.1941 | 92.9621 | 46.7587 | 39.8473 | 32.6865 | 38.9449 | Down   |
| Nabp1    | 2227.26  | 0.59778   | 0.30198 | 1.97953 | 0.04776  | 0.39169  | 1823.38 | 1912.64 | 1581.03 | 2439.88 | 3941.2  | 1665.41 | Up     |
| Gm28055  | 84.4054  | -0.6424   | 0.27958 | -2.2977 | 0.02158  | 0.25004  | 92.6472 | 109.774 | 106.181 | 75.6077 | 51.506  | 70.7157 | Down   |
| Gm8420   | 8.07115  | -2.3132   | 0.85437 | -2.7075 | 0.00678  | 0.1171   | 10.8417 | 15.8233 | 13.6379 | 2.04345 | 1.981   | 4.09946 | Down   |
| Stat1    | 3443.7   | 0.50849   | 0.21782 | 2.33447 | 0.01957  | 0.236    | 2882.91 | 3067.75 | 2578.54 | 3804.91 | 5227.86 | 3100.22 | Up     |
| Mstn     | 4.94248  | -3.7638   | 1.58731 | -2.3712 | 0.01773  | 0.22084  | 5.91365 | 17.8012 | 3.89655 | 2.04345 | 0       | 0       | Down   |
| Osgpl1   | 748.097  | -0.4669   | 0.17574 | -2.6565 | 0.00789  | 0.12886  | 811.156 | 1025.55 | 767.621 | 679.447 | 632.93  | 571.875 | Down   |
| Rftn2    | 1449.59  | -0.3259   | 0.16616 | -1.9611 | 0.04987  | 0.39986  | 1461.66 | 1747.49 | 1628.76 | 1405.89 | 1381.75 | 1072.01 | Down   |
| Casp8    | 3100.2   | 0.33294   | 0.147   | 2.26491 | 0.02352  | 0.26285  | 2986.39 | 2609.86 | 2636.02 | 3650.62 | 3742.11 | 2976.21 | Up     |
| Cd28     | 341.842  | 0.69067   | 0.28275 | 2.44264 | 0.01458  | 0.19345  | 297.654 | 259.107 | 227.948 | 458.755 | 531.899 | 275.689 | Up     |
| Ctla4    | 202.26   | 1.14537   | 0.3914  | 2.92638 | 0.00343  | 0.07439  | 133.057 | 148.344 | 96.4397 | 411.755 | 275.359 | 148.606 | Up     |
| Icos     | 280.389  | 0.83574   | 0.26465 | 3.15792 | 0.00159  | 0.04285  | 215.848 | 170.101 | 218.207 | 387.234 | 437.801 | 253.142 | Up     |
| Ndufs1   | 1032.02  | -0.7745   | 0.20403 | -3.796  | 0.00015  | 0.0073   | 1189.63 | 1646.62 | 1071.55 | 724.403 | 825.087 | 734.829 | Down   |
| Gm28982  | 46.9733  | -0.8805   | 0.35374 | -2.4892 | 0.0128   | 0.17714  | 60.1221 | 48.4589 | 74.0345 | 36.7821 | 31.696  | 30.746  | Down   |
| Fzd5     | 1380.62  | 0.31255   | 0.13103 | 2.38532 | 0.01706  | 0.216    | 1271.44 | 1093.79 | 1329.7  | 1550.98 | 1562.02 | 1475.81 | Up     |
| Akr1cl   | 27.5278  | -2.6099   | 0.71234 | -3.6639 | 0.00025  | 0.01111  | 30.5539 | 87.0283 | 24.3535 | 10.2173 | 8.91451 | 4.09946 | Down   |
| Rpe      | 2158.71  | 0.27187   | 0.1329  | 2.04578 | 0.04078  | 0.36329  | 2140.74 | 1821.66 | 1905.42 | 2359.16 | 2551.53 | 2173.74 | Up     |
| Kansl1   | 2014.24  | 0.35592   | 0.13334 | 2.6692  | 0.0076   | 0.12601  | 1816.48 | 1640.68 | 1844.04 | 2214.08 | 2502.01 | 2068.18 | Up     |
| Myl1     | 95.2191  | -2.2386   | 0.8604  | -2.6018 | 0.00927  | 0.14356  | 66.0358 | 339.213 | 66.2414 | 16.3476 | 75.2781 | 8.19893 | Down   |
| Erbp4    | 206.043  | -1.0934   | 0.54454 | -2.008  | 0.04464  | 0.37936  | 173.467 | 453.932 | 214.31  | 137.933 | 47.544  | 209.073 | Down   |
| Wvc2l    | 3.55695  | 3.30045   | 1.55459 | 2.12304 | 0.03375  | 0.32407  | 0       | 0.98896 | 0.97414 | 8.1738  | 1.981   | 9.22379 | Up     |
| Bard1    | 115.307  | 0.77      | 0.30348 | 2.53724 | 0.01117  | 0.16237  | 95.604  | 91.9731 | 68.1897 | 181.867 | 146.594 | 107.611 | Up     |
| Gm8885   | 3.7679   | -5.3389   | 1.67829 | -3.1811 | 0.00147  | 0.04083  | 5.91365 | 8.90062 | 7.79311 | 0       | 0       | 0       | Down   |
| C530043A | 87.1147  | -2.5656   | 0.88035 | -2.9143 | 0.00357  | 0.07578  | 54.2085 | 347.124 | 45.7845 | 20.4345 | 5.94301 | 49.1936 | Down   |
| Arpc2    | 18296.3  | 0.21115   | 0.10462 | 2.01817 | 0.04357  | 0.37434  | 17722.2 | 16357.4 | 16800   | 19229.9 | 21002.6 | 18665.9 | Up     |
| Stk36    | 1473.88  | -0.5625   | 0.26552 | -2.1185 | 0.03414  | 0.32547  | 1647.94 | 1754.41 | 1870.35 | 1157.61 | 785.467 | 1627.49 | Down   |
| Ihh      | 89.9193  | -1.0242   | 0.28482 | -3.5961 | 0.00032  | 0.0136   | 136.014 | 112.741 | 113     | 45.9776 | 71.3161 | 60.4671 | Down   |
| Resp18   | 40.8273  | -1.8185   | 0.71701 | -2.5362 | 0.01121  | 0.1626   | 76.8775 | 61.3154 | 52.6035 | 15.3259 | 2.9715  | 35.8703 | Down   |
| Des      | 8305.96  | -0.8628   | 0.25133 | -3.4329 | 0.0006   | 0.02174  | 7773.5  | 14829.4 | 9551.43 | 5692.03 | 5449.74 | 6539.67 | Down   |
| Spep     | 553.159  | -0.9498   | 0.26985 | -3.5196 | 0.00043  | 0.01691  | 658.387 | 983.024 | 545.518 | 349.43  | 454.64  | 327.957 | Down   |
| Obsl1    | 784.729  | -0.7138   | 0.1922  | -3.7141 | 0.0002   | 0.00953  | 933.371 | 1146.2  | 845.552 | 629.383 | 653.731 | 500.135 | Down   |
| Inha     | 369.188  | -0.72     | 0.21348 | -3.3727 | 0.00074  | 0.02531  | 476.049 | 535.026 | 367.25  | 260.54  | 257.53  | 318.733 | Down   |
| Slc4a3   | 1333.54  | -0.8705   | 0.23161 | -3.7586 | 0.00017  | 0.00835  | 1388.72 | 2276.58 | 1506.99 | 825.554 | 950.881 | 1052.54 | Down   |
| Gm29069  | 2.03203  | 4.48997   | 2.20757 | 2.0339  | 0.04196  | NA       | 0       | 0       | 0       | 1.02173 | 2.9715  | 8.19893 | Up     |
| Epha4    | 891.206  | -0.4982   | 0.23806 | -2.0927 | 0.03637  | 0.33907  | 1114.72 | 1274.77 | 741.319 | 738.707 | 831.03  | 646.69  | Down   |
| Scg2     | 17.4638  | -3.2211   | 0.79446 | -4.0544 | 5.03E-05 | 0.00317  | 34.4963 | 46.481  | 13.6379 | 4.0869  | 1.981   | 4.09946 | Down   |
| Wdfy1    | 3465.56  | -0.6212   | 0.20071 | -3.095  | 0.00197  | 0.05007  | 4334.71 | 3940.01 | 4326.15 | 2982.42 | 2018.64 | 3191.43 | Down   |
| Ccl20    | 130.181  | 2.43438   | 0.49825 | 4.88581 | 1.03E-06 | 0.00013  | 34.4963 | 51.4258 | 36.0431 | 281.996 | 296.16  | 80.9644 | Up     |
| Sphkap   | 50.1984  | -1.3388   | 0.60875 | -2.1992 | 0.02786  | 0.2884   | 42.3812 | 133.509 | 39.9397 | 24.5214 | 18.1895 | 42.0195 | Down   |
| Gpr55    | 24.9165  | 2.02286   | 0.92053 | 2.1975  | 0.02798  | 0.28884  | 19.7122 | 5.93375 | 3.89655 | 23.4997 | 85.1831 | 11.2735 | Up     |
| Gm18180  | 13.5396  | -1.598    | 0.76487 | -2.0892 | 0.03669  | 0.3402   | 21.6834 | 29.6687 | 9.74139 | 3.06518 | 9.90501 | 7.17406 | Down   |
| Gm16341  | 64.4066  | -0.787    | 0.34649 | -2.2715 | 0.02312  | 0.26041  | 57.1653 | 93.951  | 93.5173 | 41.8907 | 44.5725 | 55.3428 | Down   |
| B3gnt7   | 650.945  | 1.02901   | 0.49764 | 2.06776 | 0.03866  | 0.35259  | 572.639 | 378.771 | 333.155 | 550.71  | 1678.9  | 391.499 | Up     |
| Effhd1   | 313.737  | 1.05772   | 0.41743 | 2.53392 | 0.01128  | 0.16348  | 100.532 | 248.228 | 262.043 | 538.449 | 254.559 | 478.612 | Up     |
| Neu2     | 161.828  | 0.78368   | 0.34565 | 2.26726 | 0.02337  | 0.2617   | 159.669 | 84.0614 | 113     | 190.041 | 150.556 | 273.639 | Up     |
| Spp2     | 342.377  | -1.0481   | 0.37961 | -2.7611 | 0.00576  | 0.10589  | 395.229 | 492.501 | 496.811 | 201.28  | 115.889 | 352.554 | Down   |
| Asb18    | 26.0011  | -4.4169   | 1.32463 | -3.3345 | 0.00085  | 0.02818  | 19.7122 | 116.697 | 12.6638 | 0       | 6.93351 | 0       | Down   |
| Rab17    | 296.977  | -0.8538   | 0.21091 | -4.048  | 5.17E-05 | 0.00325  | 321.308 | 369.87  | 455.897 | 191.063 | 208.005 | 235.719 | Down   |
| Lrrrip1  | 8630.2   | 0.25268   | 0.09263 | 2.72779 | 0.00638  | 0.11295  | 7704.5  | 7686.18 | 8238.29 | 9259.9  | 9217.6  | 9674.73 | Up     |
| Ramp1    | 1090.16  | 0.52494   | 0.20933 | 2.50769 | 0.01215  | 0.17108  | 801.3   | 1008.74 | 871.854 | 1176.01 | 1064.79 | 1618.26 | Up     |
| Klhl30   | 112.828  | -2.3972   | 0.58042 | -4.1301 | 3.63E-05 | 0.00244  | 122.215 | 366.903 | 79.8794 | 24.5214 | 46.5535 | 36.8952 | Down   |
| Ndufa10  | 4315.17  | -0.3991   | 0.2034  | -1.962  | 0.04976  | 0.39986  | 4364.28 | 6335.27 | 4025.14 | 3640.41 | 3563.82 | 3962.13 | Down   |
| Gpc1     | 1284.83  | -1.1487   | 0.29652 | -3.874  | 0.00011  | 0.0057   | 1567.12 | 2548.54 | 1197.22 | 802.054 | 934.042 | 660.014 | Down   |
| Ankmy1   | 210.071  | -1.2381   | 0.36023 | -3.437  | 0.00059  | 0.02     |         |         |         |         |         |         |        |

|           |         |         |         |         |          |          |         |         |         |         |         |         |      |
|-----------|---------|---------|---------|---------|----------|----------|---------|---------|---------|---------|---------|---------|------|
| Pdcd1     | 63.9419 | 1.93055 | 0.68585 | 2.81484 | 0.00488  | 0.09435  | 41.3956 | 24.724  | 13.6379 | 91.9553 | 183.243 | 28.6962 | Up   |
| Slco4c1   | 3111.18 | 0.25737 | 0.12534 | 2.05335 | 0.04004  | 0.36041  | 2725.21 | 2962.92 | 2815.26 | 3148.96 | 3764.89 | 3249.85 | Up   |
| Gin1      | 822.645 | 0.25055 | 0.12703 | 1.97244 | 0.04856  | 0.39474  | 708.653 | 815.89  | 729.63  | 874.597 | 878.574 | 928.528 | Up   |
| Pam       | 21748.1 | -1.063  | 0.30058 | -3.5366 | 0.00041  | 0.01618  | 21843.1 | 44609.9 | 21797.3 | 14061   | 16081.8 | 12095.5 | Down |
| Cdh20     | 14.0096 | -2.1859 | 0.80914 | -2.7015 | 0.0069   | 0.11831  | 12.8129 | 39.5583 | 16.5604 | 2.04345 | 6.93351 | 6.1492  | Down |
| Rnf152    | 180.202 | -0.5751 | 0.23941 | -2.4024 | 0.01629  | 0.20977  | 170.51  | 267.019 | 209.44  | 143.042 | 143.623 | 147.581 | Down |
| Tnfrsf11a | 374.578 | 0.58527 | 0.21383 | 2.73713 | 0.0062   | 0.11034  | 279.913 | 358.003 | 261.069 | 420.951 | 530.908 | 396.623 | Up   |
| A530053N  | 11.2114 | -2.8665 | 0.92246 | -3.1075 | 0.00189  | 0.04868  | 15.7697 | 34.6135 | 8.76725 | 4.0869  | 1.981   | 2.04973 | Down |
| D830032E  | 8.42603 | -2.6034 | 1.16852 | -2.2279 | 0.02589  | 0.27824  | 10.8417 | 26.7019 | 5.84483 | 2.04345 | 0       | 5.12433 | Down |
| Sctr      | 7.55986 | -3.0067 | 1.17199 | -2.5655 | 0.0103   | 0.15409  | 7.88487 | 22.746  | 9.74139 | 0       | 3.962   | 1.02487 | Down |
| Dbi       | 3511.59 | -0.4055 | 0.17537 | -2.3121 | 0.02077  | 0.24509  | 3547.21 | 4735.13 | 3723.16 | 2757.64 | 2853.63 | 3452.77 | Down |
| 3110009E  | 352.725 | -0.3727 | 0.14058 | -2.6512 | 0.00802  | 0.13049  | 391.287 | 395.583 | 407.19  | 320.822 | 299.131 | 302.335 | Down |
| Steap3    | 2421.36 | -0.5759 | 0.17669 | -3.2594 | 0.00112  | 0.03367  | 3382.61 | 2568.32 | 2744.15 | 2188.54 | 1975.06 | 1669.51 | Down |
| Actr3     | 15872.5 | 0.26398 | 0.12964 | 2.0363  | 0.04172  | 0.36924  | 14141.5 | 14706.8 | 14425   | 17332.5 | 19346.5 | 15282.8 | Up   |
| Zranb3    | 305.488 | 0.78959 | 0.35593 | 2.21841 | 0.02653  | 0.28164  | 271.042 | 223.505 | 177.293 | 309.583 | 595.291 | 256.216 | Up   |
| Lct       | 6.72918 | 2.28281 | 0.98048 | 2.32826 | 0.0199   | 0.23828  | 3.94243 | 0.98896 | 1.94828 | 16.3476 | 7.92401 | 9.22379 | Up   |
| Mcm6      | 975.228 | 1.76964 | 0.21534 | 8.21778 | 2.07E-16 | 1.87E-13 | 554.898 | 359.981 | 412.061 | 1728.76 | 1481.79 | 1313.88 | Up   |
| Cxcr4     | 2232.03 | 0.70443 | 0.20694 | 3.404   | 0.00066  | 0.02336  | 1961.36 | 1554.64 | 1577.13 | 2905.79 | 3267.66 | 2125.57 | Up   |
| Rab7b     | 438.928 | 1.00163 | 0.36454 | 2.74769 | 0.006    | 0.10819  | 410.013 | 237.35  | 229.897 | 544.58  | 846.878 | 364.852 | Up   |
| 6030442K  | 40.3273 | 0.97365 | 0.46177 | 2.10853 | 0.03498  | 0.3306   | 33.5107 | 25.7129 | 22.4052 | 37.8038 | 42.5915 | 79.9395 | Up   |
| Cntrn2    | 29.1209 | -3.3151 | 1.33658 | -2.4803 | 0.01313  | 0.17964  | 3.94243 | 128.565 | 26.3017 | 0       | 13.867  | 2.04973 | Down |
| Lrrn2     | 197.526 | -1.067  | 0.31311 | -3.4078 | 0.00065  | 0.02324  | 216.834 | 386.683 | 198.724 | 127.716 | 117.87  | 137.332 | Down |
| Lax1      | 538.095 | 0.94331 | 0.35032 | 2.69275 | 0.00709  | 0.1204   | 396.215 | 339.213 | 369.199 | 703.969 | 1047.95 | 372.026 | Up   |
| Fmod      | 485.331 | -0.8525 | 0.27806 | -3.0657 | 0.00217  | 0.05353  | 855.508 | 563.706 | 454.923 | 361.691 | 391.248 | 284.913 | Down |
| Btg2      | 17483.3 | -0.7475 | 0.27075 | -2.7607 | 0.00577  | 0.10589  | 15223.7 | 28772.7 | 21744.7 | 12563.1 | 10366.6 | 16228.8 | Down |
| Chil1     | 37031.4 | 1.10168 | 0.32679 | 3.37125 | 0.00075  | 0.02537  | 32487.6 | 20394.3 | 17743   | 45246.1 | 72406.6 | 33910.8 | Up   |
| Lgr6      | 551.55  | -2.1709 | 0.49007 | -4.4299 | 9.43E-06 | 0.00081  | 555.883 | 1703.97 | 448.104 | 137.933 | 202.062 | 261.341 | Down |
| Ptpn7     | 425.317 | 0.97923 | 0.3362  | 2.91268 | 0.00358  | 0.07594  | 302.582 | 264.052 | 292.242 | 575.231 | 807.258 | 310.534 | Up   |
| Tnnt2     | 6292.29 | -4.0657 | 1.20715 | -3.368  | 0.00076  | 0.02559  | 9068.59 | 19551.7 | 7006    | 95.0205 | 1798.75 | 233.669 | Down |
| Inava     | 155.699 | -0.7174 | 0.34884 | -2.0564 | 0.03974  | 0.35945  | 118.273 | 253.173 | 209.44  | 91.9553 | 117.87  | 143.481 | Down |
| 9230116N  | 62.4016 | -0.7514 | 0.2911  | -2.5811 | 0.00985  | 0.15019  | 79.8343 | 78.1277 | 76.9569 | 38.8256 | 52.4965 | 48.1687 | Down |
| Kif14     | 72.8277 | 0.64955 | 0.30779 | 2.11039 | 0.03482  | 0.32956  | 47.3092 | 72.1939 | 50.6552 | 81.738  | 101.031 | 84.039  | Up   |
| Gm33994   | 3.51491 | 3.28973 | 1.6217  | 2.02857 | 0.0425   | 0.37204  | 0       | 0       | 1.94828 | 7.15208 | 8.91451 | 3.0746  | Up   |
| Ptprc     | 6718.4  | 0.66161 | 0.25926 | 2.5519  | 0.01071  | 0.15782  | 5858.46 | 5242.47 | 4512.21 | 7721.18 | 11249.1 | 5726.95 | Up   |
| Aspm      | 135.256 | 1.32785 | 0.42783 | 3.10371 | 0.00191  | 0.04907  | 94.6184 | 80.1056 | 56.5    | 251.344 | 236.73  | 92.2379 | Up   |
| Rgs1      | 448.592 | 0.92178 | 0.40889 | 2.25434 | 0.02417  | 0.26772  | 451.409 | 341.191 | 137.354 | 646.752 | 685.427 | 429.419 | Up   |
| Ptgs2     | 1456.7  | -0.8116 | 0.23333 | -3.4783 | 0.0005   | 0.01912  | 1857.87 | 1840.45 | 1869.37 | 1043.18 | 748.819 | 1380.49 | Down |
| Hmcn1     | 5692.48 | -0.2879 | 0.1467  | -1.9623 | 0.04972  | 0.39986  | 5683.02 | 6115.72 | 6976.78 | 5758.44 | 4830.67 | 4790.22 | Down |
| Ivns1abp  | 10555.9 | 0.22158 | 0.09227 | 2.40126 | 0.01634  | 0.21027  | 9403.69 | 10048.8 | 9788.14 | 11448.4 | 11706.7 | 10939.4 | Up   |
| Arpc5     | 14348.3 | 0.27063 | 0.11175 | 2.42179 | 0.01544  | 0.20055  | 13803.5 | 12783.3 | 12432.9 | 15563.9 | 16809.8 | 14696.6 | Up   |
| Ncf2      | 1738.9  | 0.70676 | 0.35027 | 2.01778 | 0.04361  | 0.3745   | 1672.58 | 1313.34 | 978.035 | 1835.02 | 3309.26 | 1325.15 | Up   |
| Lamc2     | 7759.92 | 0.39796 | 0.20034 | 1.98638 | 0.04699  | 0.38829  | 8003.14 | 5389.82 | 6696.23 | 10245.9 | 8659.95 | 7564.53 | Up   |
| Shcbp1l   | 57.9874 | 1.20838 | 0.53413 | 2.26235 | 0.02368  | 0.26383  | 29.5683 | 36.5914 | 38.9655 | 54.1514 | 145.604 | 43.0444 | Up   |
| Rgs16     | 14.5762 | 1.60542 | 0.59554 | 2.69576 | 0.00702  | 0.1197   | 9.85609 | 5.93375 | 5.84483 | 23.4997 | 20.8005 | 21.5222 | Up   |
| A830008E  | 39.9322 | 0.84764 | 0.40146 | 2.11136 | 0.03474  | 0.32919  | 37.4531 | 26.7019 | 21.431  | 62.3252 | 45.563  | 46.119  | Up   |
| Gm9530    | 124.573 | -0.5499 | 0.27301 | -2.0142 | 0.04399  | 0.37695  | 113.345 | 166.145 | 164.629 | 83.7815 | 111.927 | 107.611 | Down |
| BC034090  | 623.468 | -0.516  | 0.17295 | -2.9836 | 0.00285  | 0.06469  | 642.617 | 729.851 | 828.992 | 495.537 | 576.471 | 467.339 | Down |
| Gm5532    | 146.675 | -2.5559 | 0.57765 | -4.4246 | 9.66E-06 | 0.00082  | 139.956 | 487.556 | 124.69  | 36.7821 | 63.3921 | 27.6714 | Down |
| Tdrd5     | 138.012 | 1.27128 | 0.44871 | 2.83321 | 0.00461  | 0.09147  | 70.9638 | 78.1277 | 93.5173 | 147.128 | 333.799 | 104.536 | Up   |
| Tor3a     | 4553.73 | 0.25667 | 0.12344 | 2.07933 | 0.03759  | 0.34585  | 4291.34 | 4067.58 | 4090.41 | 4932.89 | 5464.59 | 4475.59 | Up   |
| Ralgps2   | 1552.39 | -0.3374 | 0.10588 | -3.1865 | 0.00144  | 0.04023  | 1775.08 | 1764.3  | 1659.93 | 1422.24 | 1374.82 | 1317.98 | Down |
| Gm28694   | 180.145 | -0.7278 | 0.369   | -1.9725 | 0.04856  | 0.39474  | 191.208 | 223.505 | 259.121 | 152.237 | 70.3256 | 184.476 | Down |
| Pappa2    | 147.854 | 0.8046  | 0.38397 | 2.09549 | 0.03613  | 0.33781  | 118.273 | 75.1608 | 129.56  | 225.801 | 232.768 | 105.561 | Up   |
| Fmo6      | 119.426 | -1.3522 | 0.60912 | -2.2198 | 0.02643  | 0.28101  | 80.8199 | 362.948 | 71.1121 | 67.4339 | 59.4301 | 74.8152 | Down |
| Mroh9     | 55.0677 | -0.8508 | 0.4139  | -2.0556 | 0.03982  | 0.35955  | 84.7624 | 73.1829 | 54.5518 | 37.8038 | 24.7625 | 55.3428 | Down |
| Prrx1     | 937.056 | -0.5905 | 0.1586  | -3.7232 | 0.0002   | 0.0093   | 1128.52 | 1288.61 | 961.475 | 755.055 | 722.075 | 766.6   | Down |
| Rglr161   | 172.598 | -0.5517 | 0.23326 | -2.3651 | 0.01802  | 0.22383  | 221.762 | 216.582 | 177.293 | 113.412 | 144.613 | 161.929 | Down |
| Cd247     | 472.124 | 0.47104 | 0.158   | 2.98134 | 0.00287  | 0.06496  | 398.186 | 382.727 | 406.216 | 625.296 | 515.06  | 505.259 | Up   |
| Gm26665   | 1.86642 | 4.36696 | 2.17618 | 2.00671 | 0.04478  | NA       | 0       | 0       | 0       | 2.04345 | 1.981   | 7.17406 | Up   |
| Dusp27    | 56.429  | -3.8288 | 0.63692 | -6.0115 | 1.84E-09 | 6.02E-07 | 59.1365 | 195.814 | 61.3707 | 6.13035 | 7.92401 | 8.19893 | Down |
| Mael      | 2.12075 | -4.5102 | 2.16611 | -2.0822 | 0.03733  | NA       | 3.94243 | 0.98896 | 7.79311 | 0       | 0       | 0       | Down |
| Fam78b    | 894.918 | 0.60242 | 0.23812 | 2.52984 | 0.01141  | 0.16459  | 554.898 | 663.591 | 913.742 | 1107.55 | 1239.12 | 890.608 | Up   |
| Rxrg      | 124.154 | -3.0216 | 0.56215 | -5.375  | 7.66E-08 | 1.50E-05 | 131.086 | 412.396 | 119.819 | 16.3476 | 38.6295 | 26.6465 | Down |
| Nuf2      | 149.428 | 1.47504 | 0.38543 | 3.82697 | 0.00013  | 0.00662  | 100.532 | 87.0283 | 49.6811 | 262.583 | 262.483 | 134.257 | Up   |
| Rgs4      | 815.499 | -0.4596 | 0.19456 | -2.3624 | 0.01816  | 0.22436  | 1055.59 | 952.367 | 825.095 | 748.925 | 761.695 | 549.328 | Down |
| Ccdc190   | 20.6804 | -1.2086 | 0.57555 | -2.1    | 0.03573  | 0.33519  | 18.7266 | 44.5031 | 23.3793 | 11.239  | 11.886  | 14.3481 | Down |
| Sh2d1b1   | 395.812 | 1.18138 | 0.46229 | 2.5555  | 0.0106   | 0.15699  | 343.977 | 258.118 | 124.69  | 487.363 | 869.66  | 291.062 | Up   |
| Olfml2b   | 793.008 | -0.4976 | 0.23927 | -2.0798 | 0.03755  | 0.34561  | 815.098 | 1131.37 | 838.733 | 649.817 | 504.165 | 818.868 | Down |
| Dusp12    | 79.3718 | -0.6245 | 0.2605  | -2.3975 | 0.01651  | 0.21132  | 97.5753 | 86.0394 | 105.207 | 64.3687 | 57.449  | 65.5914 | Down |
| Fcgr2b    | 1796.02 | 1.22284 | 0.35896 | 3.40661 | 0.00066  | 0.02324  | 1147.25 | 1190.71 | 894.259 | 2154.82 | 4007.57 | 1381.52 | Up   |
| Fcgr4     | 741.029 | 1.81934 | 0.88509 | 2.05555 | 0.03983  | 0.35955  | 453.38  | 347.124 | 181.19  | 546.623 | 2538.65 | 379.2   | Up   |
| Fcgr3     | 2187.19 | 1.09208 | 0.41532 | 2.6295  | 0.00855  | 0.13608  | 1811.55 | 1492.34 | 886.466 | 2432.73 | 4922.79 | 1577.27 | Up   |
| Fcer1g    | 2153.27 | 0.98854 | 0.31457 | 3.14252 | 0.00167  | 0.04444  | 1525.72 | 1638.7  | 1165.07 | 2372.45 | 4317.59 | 1900.1  | Up   |
| Arhgap30  | 1839.13 | 0.71909 | 0.32547 | 2.20939 | 0.02715  | 0.28514  | 1587.82 | 1363.77 | 1218.65 | 2182.41 | 3380.58 | 1301.58 | Up   |
| Cd244a    | 378.048 | 0.71515 | 0.34546 | 2.07015 | 0.03844  | 0.35169  | 272.028 | 345.146 | 241.586 | 363.734 | 726.037 | 319.758 | Up   |
| Slamf7    | 433.599 | 1.37724 | 0.41008 | 3.3585  | 0.00078  | 0.02628  | 249.359 | 220.538 | 253.276 | 525.167 | 1050.92 | 302.335 | Up   |
| Cd48      | 1504.05 | 0.77148 | 0.284   | 2.71649 | 0.0066   | 0.11532  | 1269.46 | 1111.59 | 952.708 | 1879.97 | 2596.1  | 1214.47 | Up   |
| Slamf1    |         |         |         |         |          |          |         |         |         |         |         |         |      |

|           |          |         |         |         |          |          |         |         |         |         |         |         |      |
|-----------|----------|---------|---------|---------|----------|----------|---------|---------|---------|---------|---------|---------|------|
| Ackr1     | 51.7166  | 1.27988 | 0.57258 | 2.23528 | 0.0254   | 0.27517  | 40.41   | 28.6798 | 21.431  | 124.65  | 64.3826 | 30.746  | Up   |
| Ifi206    | 392.054  | 0.61063 | 0.24576 | 2.48469 | 0.01297  | 0.17832  | 357.776 | 353.058 | 220.155 | 492.472 | 521.994 | 406.872 | Up   |
| Ifi208    | 1200.38  | 1.53818 | 0.34172 | 4.50128 | 6.75E-06 | 0.00065  | 413.956 | 434.153 | 996.544 | 1912.67 | 1849.27 | 1595.72 | Up   |
| Spta1     | 75.0243  | -1.6389 | 0.66499 | -2.4646 | 0.01372  | 0.18549  | 77.8631 | 189.88  | 73.0604 | 10.2173 | 67.3541 | 31.7708 | Down |
| Rgs7      | 47.8627  | -1.9956 | 0.60276 | -3.3107 | 0.00093  | 0.02986  | 43.3668 | 143.399 | 42.8621 | 14.3042 | 23.772  | 19.4725 | Down |
| Efcab2    | 773.037  | -0.7952 | 0.28718 | -2.7692 | 0.00562  | 0.10469  | 788.487 | 1247.08 | 906.923 | 520.058 | 409.077 | 766.6   | Down |
| Kif28     | 6.4285   | -3.0793 | 1.40049 | -2.1987 | 0.0279   | 0.28853  | 6.89926 | 19.7792 | 7.79311 | 0       | 0       | 4.09946 | Down |
| Coq8a     | 1404.24  | -1.564  | 0.3866  | -4.0455 | 5.22E-05 | 0.00326  | 1607.53 | 3576.07 | 1112.47 | 653.904 | 748.819 | 726.63  | Down |
| Gm37267   | 8.65595  | 1.93152 | 0.94871 | 2.03594 | 0.04176  | 0.36941  | 3.94243 | 1.97792 | 4.87069 | 5.10863 | 24.7625 | 11.2735 | Up   |
| Cenpf     | 164.554  | 1.5318  | 0.3577  | 4.28232 | 1.85E-05 | 0.00137  | 95.604  | 87.0283 | 71.1121 | 321.843 | 273.378 | 138.357 | Up   |
| Vash2     | 30.3259  | -1.3084 | 0.52271 | -2.5032 | 0.01231  | 0.17216  | 42.3812 | 40.5473 | 46.7587 | 9.19553 | 28.7245 | 14.3481 | Down |
| Gm8407    | 5.58153  | -3.9619 | 1.52572 | -2.5967 | 0.00941  | 0.14527  | 1.97122 | 18.7902 | 10.7155 | 1.02173 | 0.9905  | 0       | Down |
| Nsl1      | 87.0938  | 1.04925 | 0.37504 | 2.79773 | 0.00515  | 0.09792  | 79.8343 | 54.3927 | 36.0431 | 144.063 | 112.917 | 95.3125 | Up   |
| Dtl       | 116.406  | 1.29054 | 0.36434 | 3.5421  | 0.0004   | 0.01596  | 100.532 | 55.3817 | 46.7587 | 202.302 | 137.68  | 155.78  | Up   |
| Lpgat1    | 16571.98 | -0.3636 | 0.11812 | -3.078  | 0.00208  | 0.05192  | 7398.96 | 7984.85 | 6803.38 | 5672.62 | 5486.38 | 6085.65 | Down |
| 1700034H  | 471.238  | -1.0184 | 0.25672 | -3.9669 | 7.28E-05 | 0.00417  | 159.669 | 204.714 | 226.974 | 100.129 | 80.2306 | 111.71  | Down |
| Gm32460   | 6.91443  | 2.89462 | 1.14033 | 2.5384  | 0.01114  | 0.16205  | 3.94243 | 0       | 0.97414 | 16.3476 | 7.92401 | 12.2984 | Up   |
| Traf5     | 1033.89  | 0.44584 | 0.16717 | 2.66701 | 0.00765  | 0.12664  | 1043.76 | 812.924 | 769.569 | 1139.22 | 1249.02 | 1188.84 | Up   |
| Rcor3     | 888.569  | -0.2541 | 0.11363 | -2.2365 | 0.02532  | 0.27488  | 926.472 | 963.245 | 1010.18 | 793.881 | 830.04  | 807.594 | Down |
| Olah      | 46.6532  | -1.361  | 0.61087 | -2.2279 | 0.02589  | 0.27824  | 98.5609 | 38.5694 | 64.2931 | 24.5214 | 9.90501 | 44.0692 | Down |
| Cdnf      | 138.594  | -0.9691 | 0.3536  | -2.7407 | 0.00613  | 0.10967  | 168.539 | 263.063 | 118.845 | 105.238 | 100.041 | 75.8401 | Down |
| Frm4a     | 4625.84  | 0.37813 | 0.12937 | 2.9228  | 0.00347  | 0.07476  | 4193.77 | 3807.49 | 4068    | 5574.53 | 5496.29 | 4614.97 | Up   |
| Phyh      | 4498.44  | -0.6977 | 0.25649 | -2.7201 | 0.00653  | 0.11449  | 4465.79 | 7878.04 | 4352.45 | 3400.3  | 136.92  | 3757.16 | Down |
| Mcm10     | 107.57   | 0.63024 | 0.30966 | 2.03529 | 0.04182  | 0.36968  | 79.8343 | 71.205  | 102.285 | 152.237 | 146.594 | 93.2628 | Up   |
| Ccdc3     | 210.088  | -0.8736 | 0.37216 | -2.3474 | 0.0189   | 0.23012  | 232.604 | 414.373 | 168.526 | 113.412 | 160.461 | 171.153 | Down |
| Gm13391   | 52.4731  | 1.46889 | 0.62802 | 2.33893 | 0.01934  | 0.234    | 29.5683 | 29.6687 | 24.3535 | 43.9342 | 154.518 | 32.7957 | Up   |
| Gm38386   | 3.01523  | 0.56094 | 1.84447 | 2.74384 | 0.00607  | 0.10892  | 0       | 0       | 0       | 4.0869  | 5.90501 | 4.09946 | Up   |
| Gata3     | 365.514  | 0.63379 | 0.24081 | 2.63194 | 0.00849  | 0.13561  | 273.014 | 331.301 | 255.224 | 526.189 | 479.402 | 327.957 | Up   |
| Itih5     | 635.205  | -0.3342 | 0.16089 | -2.0773 | 0.03777  | 0.34709  | 737.235 | 783.255 | 604.94  | 585.449 | 571.519 | 528.831 | Down |
| Prkcq     | 1043.89  | 0.51395 | 0.17592 | 2.92146 | 0.00348  | 0.07481  | 802.286 | 951.378 | 826.069 | 1407.94 | 1255.96 | 1019.74 | Up   |
| Il2ra     | 168.965  | 0.70611 | 0.26    | 2.71583 | 0.00661  | 0.11532  | 128.129 | 130.542 | 126.638 | 241.127 | 237.72  | 149.63  | Up   |
| E0300131I | 295.685  | -0.6427 | 0.16358 | -3.9288 | 8.54E-05 | 0.00475  | 337.078 | 394.594 | 349.716 | 236.019 | 217.91  | 238.794 | Down |
| Vim       | 44675.6  | 0.34791 | 0.16426 | 2.11803 | 0.03417  | 0.32567  | 41604.5 | 35795.3 | 40544.6 | 55964   | 53195.8 | 40949.5 | Up   |
| Mrc1      | 3878.41  | 0.86454 | 0.41772 | 2.06968 | 0.03848  | 0.35169  | 4010.44 | 2788.86 | 1450.49 | 4933.91 | 7325.74 | 2760.99 | Up   |
| Slc39a12  | 44.4596  | 0.9636  | 0.43077 | 2.23695 | 0.02529  | 0.27483  | 30.5539 | 32.6356 | 27.2759 | 56.1949 | 83.2021 | 36.8952 | Up   |
| Pip4k2a   | 2319.15  | 0.4547  | 0.19614 | 2.31818 | 0.02044  | 0.24239  | 2223.53 | 1849.35 | 1797.29 | 2664.66 | 3232.99 | 2147.09 | Up   |
| Gm13375   | 263.454  | -0.5606 | 0.18645 | -3.0066 | 0.00264  | 0.06128  | 290.755 | 361.959 | 289.319 | 199.236 | 122.958 | 226.495 | Down |
| Il1rn     | 497.282  | 1.41471 | 0.3794  | 3.72881 | 0.00019  | 0.00913  | 392.272 | 250.206 | 171.448 | 773.446 | 961.776 | 434.543 | Up   |
| Tor4a     | 2514.23  | 0.34311 | 0.12654 | 2.71142 | 0.0067   | 0.11621  | 2160.45 | 2063.96 | 2425.61 | 2679.99 | 3020.04 | 2735.37 | Up   |
| Grin1     | 38.6983  | -1.0677 | 0.39348 | -2.7136 | 0.00666  | 0.11573  | 40.41   | 55.3817 | 61.3707 | 29.63   | 20.8005 | 24.5968 | Down |
| Entpd2    | 188.791  | -0.5493 | 0.24625 | -2.2308 | 0.02569  | 0.27716  | 197.122 | 287.787 | 188.009 | 155.302 | 143.623 | 160.904 | Down |
| Fut7      | 45.7934  | 0.98371 | 0.47807 | 2.05769 | 0.03962  | 0.35889  | 40.41   | 16.8123 | 35.069  | 58.2383 | 82.2116 | 42.0195 | Up   |
| Ptgds     | 38.1563  | -2.2297 | 1.03803 | -2.148  | 0.03171  | 0.31185  | 16.7553 | 165.156 | 6.81897 | 10.2173 | 21.791  | 8.19893 | Down |
| A230005M  | 2.45837  | -4.7227 | 1.91977 | -2.4601 | 0.01389  | 0.18691  | 2.95683 | 6.92271 | 4.87069 | 0       | 0       | 0       | Down |
| Slc2a6    | 236.138  | 0.69166 | 0.34114 | 2.02747 | 0.04261  | 0.37265  | 196.136 | 188.891 | 156.836 | 271.779 | 426.906 | 176.277 | Up   |
| Gm10134   | 367.904  | 0.46953 | 0.16033 | 2.92851 | 0.00341  | 0.07409  | 310.467 | 296.687 | 318.543 | 461.82  | 442.754 | 377.151 | Up   |
| Gfi1b     | 20.6883  | 1.50053 | 0.54786 | 2.73889 | 0.00616  | 0.11002  | 11.8273 | 9.88958 | 10.7155 | 28.6083 | 42.5915 | 20.4973 | Up   |
| Miga2     | 1520.28  | -0.3595 | 0.16622 | -2.163  | 0.03054  | 0.30531  | 1443.92 | 2018.46 | 1663.83 | 1315.98 | 1285.67 | 1393.82 | Down |
| Gm14488   | 24.4855  | -1.1958 | 0.52005 | -2.2994 | 0.02148  | 0.24997  | 23.6546 | 43.5142 | 35.069  | 13.2824 | 10.8955 | 20.4973 | Down |
| Usp20     | 1498.31  | -0.3248 | 0.1422  | -2.2841 | 0.02237  | 0.25524  | 1662.72 | 1721.78 | 1614.15 | 1314.96 | 1171.76 | 1504.5  | Down |
| Hmcn2     | 271.649  | -0.6941 | 0.32208 | -2.1551 | 0.03116  | 0.30876  | 265.129 | 441.075 | 301.009 | 200.258 | 142.632 | 279.788 | Down |
| Ass1      | 1711.15  | 0.32097 | 0.14576 | 2.20207 | 0.02766  | 0.28707  | 1355.21 | 1602.11 | 1607.33 | 1824.8  | 1762.1  | 2115.32 | Up   |
| Plpp7     | 245.446  | -0.8775 | 0.35925 | -2.4425 | 0.01458  | 0.19345  | 238.517 | 455.91  | 259.121 | 169.606 | 116.879 | 232.645 | Down |
| Lcn2      | 11568.1  | 1.56267 | 0.36743 | 4.25293 | 2.11E-05 | 0.00153  | 8668.43 | 5106.98 | 3778.68 | 16348.6 | 24624.8 | 10881   | Up   |
| Slc25a25  | 2061.54  | -0.306  | 0.13121 | -2.3321 | 0.0197   | 0.23657  | 2234.37 | 2342.84 | 2260.98 | 1676.65 | 2072.13 | 1782.24 | Down |
| Ak1       | 1745.24  | -1.0877 | 0.36481 | -2.9815 | 0.00287  | 0.06496  | 2024.44 | 3426.74 | 1669.67 | 1014.57 | 699.294 | 1636.71 | Down |
| Eng       | 32649.9  | 0.37755 | 0.18436 | 2.04785 | 0.04058  | 0.36253  | 25350.8 | 26657.4 | 33197.7 | 34871.5 | 43907.9 | 31914.3 | Up   |
| Lmx1b     | 43.1105  | -3.0237 | 0.53781 | -5.6222 | 1.89E-08 | 4.57E-08 | 85.748  | 93.951  | 50.6552 | 14.3042 | 9.90501 | 4.09946 | Down |
| C130021H  | 122.377  | -2.8558 | 0.4302  | -6.6384 | 3.17E-11 | 1.34E-08 | 189.237 | 325.367 | 130.535 | 21.4562 | 28.7245 | 38.9449 | Down |
| C230014C  | 77.9873  | 0.75624 | 0.29354 | 2.57629 | 0.00999  | 0.15156  | 56.1797 | 66.2602 | 51.6293 | 83.7815 | 118.86  | 91.2131 | Up   |
| Phf19     | 226.019  | 0.69196 | 0.30433 | 2.2737  | 0.02298  | 0.25959  | 244.431 | 153.289 | 120.793 | 322.865 | 258.521 | 256.216 | Up   |
| Traf1     | 4648.67  | 0.28093 | 0.09924 | 2.83073 | 0.00464  | 0.09178  | 4025.23 | 4141.76 | 4425.51 | 5049.37 | 5274.42 | 4975.72 | Up   |
| Hc        | 22673.3  | 0.60276 | 0.12783 | 4.71521 | 2.41E-06 | 0.00027  | 16559.2 | 20077.8 | 17376.7 | 26018.2 | 29131.6 | 26876.1 | Up   |
| Glo1-ps   | 36.2982  | -2.1796 | 1.10537 | -1.9718 | 0.04863  | 0.39488  | 154.741 | 19.7792 | 3.89655 | 4.0869  | 16.8385 | 18.4476 | Down |
| Lhx6      | 301.325  | 1.04459 | 0.25222 | 4.14166 | 3.45E-05 | 0.00236  | 190.222 | 173.068 | 226.974 | 514.95  | 393.229 | 309.509 | Up   |
| Ptgs1     | 4777.01  | 0.50059 | 0.24034 | 2.08285 | 0.03727  | 0.34397  | 4307.11 | 4106.15 | 3456.24 | 5630.73 | 7236.6  | 3925.24 | Up   |
| Nek6      | 1804.06  | 0.48691 | 0.19101 | 2.54918 | 0.0108   | 0.15841  | 1565.15 | 1465.64 | 1476.79 | 1885.08 | 2653.55 | 1778.14 | Up   |
| Kynu      | 308.194  | 1.47565 | 0.57234 | 2.5783  | 0.00993  | 0.15089  | 270.057 | 120.653 | 98.388  | 378.038 | 821.125 | 160.904 | Up   |
| Gm13479   | 5.25937  | -2.396  | 1.12509 | -2.1296 | 0.03321  | 0.32161  | 9.85609 | 7.91166 | 8.76725 | 0       | 2.9715  | 2.04973 | Down |
| Lypd6b    | 540.81   | -0.3756 | 0.15495 | -2.4241 | 0.01535  | 0.19982  | 564.754 | 603.264 | 664.362 | 523.123 | 449.687 | 439.667 | Down |
| Nmi       | 1724.05  | 0.24557 | 0.09926 | 2.47392 | 0.01336  | 0.18196  | 1572.05 | 1546.73 | 1614.15 | 1895.3  | 1803.7  | 1912.4  | Up   |
| Gm14033   | 5.58808  | -5.9071 | 1.67226 | -3.5324 | 0.00041  | 0.01635  | 10.8417 | 18.7902 | 3.89655 | 0       | 0       | 0       | Down |
| Cytip     | 5636.78  | 0.52434 | 0.22728 | 2.30702 | 0.02105  | 0.24709  | 5446.47 | 4551.19 | 3873.17 | 6436.87 | 8386.57 | 5126.38 | Up   |
| Ly75      | 1485.55  | 0.73866 | 0.32073 | 2.30307 | 0.02127  | 0.24897  | 1444.9  | 1075    | 820.225 | 1555.07 | 2700.11 | 1317.98 | Up   |
| Ifih1     | 2453.04  | 0.33273 | 0.15236 | 2.18378 | 0.02898  | 0.29496  | 2354.62 | 2159.88 | 1999.91 | 2704.51 | 3104.23 | 2395.11 | Up   |
| Slc38a11  | 118.713  | -2.8167 | 0.65667 | -4.2894 | 1.79E-05 | 0.00134  | 72.935  | 422.285 | 128.586 | 21.4562 | 47.544  | 19.4725 | Down |
| Scn7a     | 19375.2  | -0.4261 | 0.16523 | -2.5788 | 0.00992  | 0.15089  | 20555.9 | 21301.2 | 24789.9 | 18400.3 | 13711.5 | 17492.4 | Down |
| Xirp2</   |          |         |         |         |          |          |         |         |         |         |         |         |      |

|          |         |         |         |         |          |          |         |         |         |         |         |         |      |
|----------|---------|---------|---------|---------|----------|----------|---------|---------|---------|---------|---------|---------|------|
| Sp5      | 168.441 | 0.86184 | 0.24194 | 3.56215 | 0.00037  | 0.01496  | 144.884 | 97.9068 | 115.922 | 191.063 | 215.929 | 244.943 | Up   |
| Metap1d  | 855.669 | -0.4167 | 0.12851 | -3.2424 | 0.00119  | 0.03511  | 940.271 | 960.278 | 1034.54 | 792.859 | 710.189 | 695.884 | Down |
| Platr26  | 8.71177 | -5.5574 | 1.4846  | -3.7434 | 0.00018  | 0.00879  | 12.8129 | 29.6687 | 8.76725 | 1.02173 | 0       | 0       | Down |
| Ttn      | 4969.14 | -3.8747 | 1.05022 | -3.6894 | 0.00022  | 0.01026  | 5428.73 | 18412.4 | 4070.93 | 274.844 | 1434.25 | 193.7   | Down |
| Gm37004  | 33.7552 | 1.96738 | 0.67188 | 2.92816 | 0.00341  | 0.07409  | 19.7122 | 6.92271 | 14.6121 | 71.5208 | 71.3161 | 18.4476 | Up   |
| Frzb     | 24.9243 | -2.8535 | 1.0966  | -2.6021 | 0.00927  | 0.14353  | 9.85609 | 113.73  | 7.79311 | 2.04345 | 7.92401 | 8.19893 | Down |
| Gm4735   | 611.005 | -2.687  | 0.21425 | -12.541 | 4.44E-36 | 8.71E-33 | 1304.95 | 840.614 | 1027.72 | 155.302 | 169.376 | 168.078 | Down |
| Gm13710  | 296.179 | 1.29179 | 0.27776 | 4.65077 | 3.31E-06 | 0.00035  | 129.115 | 230.427 | 155.862 | 425.038 | 492.279 | 344.355 | Up   |
| Prg2     | 57.0657 | 2.01545 | 0.65474 | 3.07824 | 0.00208  | 0.05192  | 30.5539 | 23.735  | 13.6379 | 63.347  | 177.3   | 33.8206 | Up   |
| Gm13712  | 7.71308 | -3.3815 | 1.02379 | -3.3029 | 0.00096  | 0.03049  | 15.7697 | 9.88958 | 16.5604 | 2.04345 | 0.9905  | 1.02487 | Down |
| Olfr1033 | 4634.29 | -0.7323 | 0.35888 | -2.0405 | 0.0413   | 0.36628  | 3501.87 | 7187.75 | 6667.98 | 3245    | 5039.67 | 2163.49 | Down |
| Ptpmt1   | 494.452 | -0.6655 | 0.12986 | -2.0442 | 0.04093  | 0.3642   | 547.013 | 511.291 | 561.104 | 443.429 | 444.735 | 459.14  | Down |
| Rapsn    | 81.0579 | -0.8921 | 0.37728 | -2.3646 | 0.01805  | 0.22385  | 97.5753 | 147.355 | 71.1121 | 50.0645 | 49.525  | 70.7157 | Down |
| Spi1     | 1575.38 | 0.8913  | 0.36844 | 2.41909 | 0.01556  | 0.20168  | 1520.79 | 1025.55 | 764.699 | 1831.95 | 3080.46 | 1228.81 | Up   |
| Mybpc3   | 1318.09 | -4.4532 | 1.32051 | -3.3723 | 0.00075  | 0.02531  | 1112.75 | 5511.46 | 939.07  | 26.5649 | 297.15  | 21.5222 | Down |
| Pacsin3  | 1323.98 | -0.4643 | 0.21502 | -2.1594 | 0.03082  | 0.30715  | 1507    | 1808.8  | 1289.76 | 1090.18 | 897.394 | 1350.77 | Down |
| Gm13780  | 15.7089 | -1.6894 | 0.71786 | -2.3534 | 0.0186   | 0.22746  | 17.741  | 41.5362 | 12.6638 | 9.19553 | 5.94301 | 7.17406 | Down |
| Lrrc4c   | 131.633 | -0.764  | 0.242   | -3.1569 | 0.00159  | 0.04292  | 154.741 | 154.277 | 188.009 | 116.477 | 88.1546 | 88.1385 | Down |
| Gm10800  | 170.588 | 2.90861 | 1.08508 | 2.68055 | 0.00735  | 0.1232   | 35.4819 | 69.2271 | 15.5862 | 712.143 | 75.2781 | 115.81  | Up   |
| Cd44     | 9006.82 | 0.66258 | 0.23412 | 2.83008 | 0.00465  | 0.09178  | 7598.06 | 7102.7  | 6221.82 | 11719.2 | 13767   | 7632.18 | Up   |
| Gm13881  | 11.2144 | -2.3281 | 0.81005 | -2.874  | 0.00405  | 0.08338  | 17.741  | 23.735  | 14.6121 | 2.04345 | 1.981   | 7.17406 | Down |
| Cd59a    | 893.381 | -0.8036 | 0.33026 | -2.4332 | 0.01497  | 0.19658  | 1239.9  | 1327.18 | 840.682 | 824.532 | 365.495 | 762.5   | Down |
| Depdc7   | 117.568 | 0.62022 | 0.24105 | 2.57294 | 0.01008  | 0.15228  | 87.7192 | 86.0394 | 104.233 | 165.52  | 131.737 | 130.158 | Up   |
| Gm13886  | 33.7811 | -0.8634 | 0.39014 | -2.2131 | 0.02689  | 0.28339  | 38.4387 | 52.4148 | 39.3997 | 26.5649 | 22.7815 | 22.547  | Down |
| Hadhb-ps | 1682.09 | -0.6552 | 0.25613 | -2.5582 | 0.01052  | 0.1567   | 1758.33 | 2851.17 | 1563.49 | 1127.98 | 1422.36 | 1369.22 | Down |
| Kif18a   | 290.447 | 0.51802 | 0.18376 | 2.81905 | 0.00482  | 0.09354  | 241.474 | 246.251 | 228.923 | 360.669 | 377.381 | 287.987 | Up   |
| Lgr4     | 460.18  | -0.5531 | 0.23547 | -2.3489 | 0.01883  | 0.22961  | 521.387 | 680.403 | 440.311 | 349.43  | 446.716 | 322.833 | Down |
| Aven     | 803.042 | 0.27957 | 0.14056 | 1.989   | 0.0467   | 0.38699  | 707.667 | 691.282 | 777.363 | 965.53  | 805.277 | 871.136 | Up   |
| Scg5     | 63.2963 | -1.124  | 0.29311 | -3.8349 | 0.00013  | 0.00644  | 84.7624 | 79.1166 | 96.4397 | 43.9342 | 38.6295 | 36.8952 | Down |
| Arhgap11 | 330.427 | 0.98431 | 0.13862 | 3.08927 | 0.00201  | 0.05092  | 237.532 | 230.427 | 197.75  | 519.036 | 547.747 | 250.067 | Up   |
| A530058N | 18.9132 | -4.7608 | 1.23058 | -3.8687 | 0.00011  | 0.0058   | 6.89926 | 83.0725 | 19.4828 | 2.04345 | 1.981   | 0       | Down |
| Rasgrp1  | 679.274 | 0.46143 | 0.22699 | 2.03285 | 0.04207  | 0.37095  | 623.89  | 576.563 | 514.345 | 803.076 | 975.643 | 582.124 | Up   |
| Eif2ak4  | 2033.97 | 0.40443 | 0.12935 | 3.12671 | 0.00177  | 0.0465   | 1880.54 | 1629.8  | 1741.76 | 2530.81 | 2167.22 | 2253.68 | Up   |
| Bmf      | 2018.34 | 0.67624 | 0.13109 | 5.15864 | 2.49E-07 | 4.06E-05 | 1689.33 | 1429.04 | 1543.04 | 2340.77 | 2691.19 | 2416.63 | Up   |
| Bub1b    | 293.339 | 0.80882 | 0.34408 | 2.35069 | 0.01874  | 0.22882  | 264.143 | 228.449 | 147.095 | 343.3   | 525.956 | 251.092 | Up   |
| Pak6     | 1266.13 | 1.38744 | 0.24258 | 5.71941 | 1.07E-08 | 2.78E-06 | 675.142 | 678.425 | 747.164 | 2453.16 | 1327.27 | 1715.63 | Up   |
| Knstrn   | 212.743 | 1.588   | 0.27125 | 5.85439 | 4.79E-09 | 1.34E-06 | 127.144 | 101.863 | 89.6207 | 405.625 | 301.112 | 251.092 | Up   |
| Ivd      | 6565.96 | -0.4236 | 0.16329 | -2.5945 | 0.00947  | 0.14581  | 6920.94 | 8440.76 | 7207.65 | 4906.33 | 5410.12 | 6509.95 | Down |
| Kn11     | 84.2226 | 1.48944 | 0.37201 | 4.00373 | 6.24E-05 | 0.00372  | 52.2373 | 41.5362 | 38.9655 | 149.172 | 147.585 | 75.8401 | Up   |
| Rad51    | 147.532 | 1.18297 | 0.38896 | 3.04136 | 0.00236  | 0.05665  | 113.345 | 98.8958 | 58.4483 | 290.17  | 193.148 | 131.183 | Up   |
| Gchfr    | 170.394 | 1.24247 | 0.42516 | 2.92235 | 0.00347  | 0.0748   | 96.5897 | 103.841 | 103.259 | 368.843 | 107.965 | 241.868 | Up   |
| Dnajc17  | 474.437 | -0.3383 | 0.16489 | -2.0519 | 0.04018  | 0.36086  | 524.344 | 544.916 | 520.19  | 359.647 | 420.963 | 476.563 | Down |
| Gm14207  | 181.262 | 0.97733 | 0.31674 | 3.08556 | 0.00203  | 0.05138  | 106.446 | 116.697 | 143.198 | 293.235 | 277.34  | 150.655 | Up   |
| Dl14     | 3397.55 | 0.62315 | 0.16471 | 3.78324 | 0.00015  | 0.00761  | 2389.12 | 2433.83 | 3201.99 | 4204.4  | 4339.38 | 3816.6  | Up   |
| Chac1    | 214.086 | 0.91678 | 0.2356  | 3.89126 | 9.97E-05 | 0.00537  | 131.086 | 129.554 | 184.112 | 240.105 | 292.198 | 307.46  | Up   |
| Exd1     | 300.888 | 1.06807 | 0.24013 | 4.44785 | 8.67E-06 | 0.00075  | 170.51  | 220.538 | 191.905 | 505.754 | 317.951 | 398.673 | Up   |
| Nusap1   | 376.623 | 0.77236 | 0.28775 | 2.68412 | 0.00727  | 0.1224   | 321.308 | 246.251 | 266.914 | 603.84  | 517.041 | 304.385 | Up   |
| Gm28042  | 7.91284 | -2.0773 | 0.90426 | -2.2972 | 0.0216   | 0.25016  | 16.7553 | 13.8454 | 7.79311 | 1.02173 | 3.962   | 4.09946 | Down |
| Pla2g4e  | 34.2074 | -2.9202 | 1.04028 | -2.8071 | 0.005    | 0.09613  | 34.963  | 113.73  | 33.1207 | 4.0869  | 19.81   | 0       | Down |
| Pla2g4f  | 531.039 | 1.23892 | 0.2096  | 5.91098 | 3.40E-09 | 1.05E-06 | 378.474 | 318.445 | 251.328 | 848.032 | 672.55  | 717.406 | Up   |
| Lrrc57   | 1543.63 | -0.216  | 0.09891 | -2.1843 | 0.02894  | 0.29481  | 1701.16 | 1612.99 | 1662.85 | 1400.79 | 1447.12 | 1436.86 | Down |
| Haus2    | 1304.78 | -0.3431 | 0.13133 | -2.6127 | 0.00898  | 0.14076  | 1463.63 | 1465.64 | 1448.54 | 1060.55 | 1290.62 | 1099.68 | Down |
| AV039307 | 30.432  | 1.32693 | 0.44208 | 3.00155 | 0.00269  | 0.06203  | 19.7122 | 10.8785 | 21.431  | 40.869  | 43.582  | 46.119  | Up   |
| Map1a    | 578.991 | -0.3868 | 0.16618 | -2.3278 | 0.01992  | 0.23828  | 739.207 | 583.485 | 645.854 | 460.798 | 553.69  | 490.911 | Down |
| Pdia3    | 33354.7 | 0.23262 | 0.09363 | 2.48452 | 0.01297  | 0.17832  | 30922.5 | 30145.4 | 30946.4 | 37282.8 | 36908   | 33923.1 | Up   |
| Hypk     | 37.7357 | 0.80215 | 0.37225 | 2.15491 | 0.03117  | 0.30876  | 27.597  | 22.746  | 32.1466 | 53.1297 | 41.601  | 49.1936 | Up   |
| Mfap1b   | 646.781 | -0.423  | 0.15113 | -2.799  | 0.00513  | 0.0977   | 726.394 | 793.144 | 703.328 | 484.298 | 589.348 | 584.174 | Down |
| Frmd5    | 927.269 | -1.6548 | 0.7443  | -2.2233 | 0.02619  | 0.28002  | 477.035 | 2861.06 | 884.518 | 452.624 | 359.552 | 528.831 | Down |
| Casc4    | 4120.41 | -0.8171 | 0.25959 | -3.1474 | 0.00165  | 0.04397  | 5456.33 | 4905.23 | 5409.39 | 1861.58 | 3429.11 | 3660.82 | Down |
| Eif3j1   | 2113.49 | -0.4884 | 0.19536 | -2.5    | 0.01242  | 0.17268  | 2481.76 | 2311.2  | 2610.69 | 1327.22 | 2031.52 | 1918.55 | Down |
| Gatm     | 666.655 | 2.80789 | 0.38447 | 7.30331 | 2.81E-13 | 1.60E-10 | 202.05  | 177.023 | 120.793 | 1514.2  | 1427.31 | 558.552 | Up   |
| Bloc1s6  | 1895.74 | 0.39358 | 0.12985 | 3.03104 | 0.00244  | 0.05803  | 1618.37 | 1723.75 | 1574.21 | 2239.62 | 2300.93 | 1917.52 | Up   |
| Slc24a5  | 346.519 | -0.6801 | 0.21784 | -3.1222 | 0.00179  | 0.04698  | 366.646 | 374.815 | 538.699 | 258.497 | 285.264 | 255.192 | Down |
| Fam227b  | 85.6282 | 0.59763 | 0.30475 | 1.96108 | 0.04987  | 0.39986  | 71.9494 | 61.3154 | 71.1121 | 132.824 | 80.2306 | 96.3374 | Up   |
| Atp8b4   | 463.644 | 0.82718 | 0.28324 | 2.92047 | 0.0035   | 0.07481  | 313.424 | 372.837 | 316.595 | 484.298 | 847.869 | 446.842 | Up   |
| Blvra    | 1332.26 | 0.29044 | 0.13457 | 2.15822 | 0.03091  | 0.30734  | 1284.25 | 1176.86 | 1134.87 | 1412.02 | 1620.46 | 1365.12 | Up   |
| Ncaph    | 573.938 | 0.29652 | 0.14651 | 2.02382 | 0.04299  | 0.37324  | 487.876 | 492.501 | 565     | 674.339 | 584.396 | 639.516 | Up   |
| Dusp2    | 394.014 | 0.7456  | 0.31062 | 2.4004  | 0.01638  | 0.21052  | 269.071 | 423.274 | 190.931 | 550.71  | 516.051 | 414.046 | Up   |
| Gpat2    | 50.3124 | -2.0777 | 0.51826 | -4.009  | 6.10E-05 | 0.00367  | 43.3668 | 129.554 | 71.1121 | 19.4128 | 14.8575 | 23.5719 | Down |
| Mall     | 623.073 | -0.5631 | 0.25349 | -2.2214 | 0.02632  | 0.2807   | 652.473 | 897.974 | 678.975 | 391.321 | 455.63  | 662.063 | Down |
| Bub1     | 225.82  | 0.57815 | 0.19655 | 2.94152 | 0.00327  | 0.07204  | 163.611 | 194.825 | 185.086 | 300.387 | 277.34  | 233.669 | Up   |
| Morrbid  | 579.031 | 0.42918 | 0.2052  | 2.09154 | 0.03648  | 0.33955  | 474.078 | 538.982 | 467.587 | 785.707 | 693.351 | 514.483 | Up   |
| Vinac1   | 64.0422 | -0.7461 | 0.29368 | -2.5406 | 0.01107  | 0.16147  | 71.9494 | 85.0504 | 83.7759 | 41.8907 | 55.468  | 46.119  | Down |
| Polr1b   | 1175.12 | -0.3027 | 0.14163 | -2.1376 | 0.03255  | 0.31668  | 1252.71 | 1252.02 | 1389.12 | 934.879 | 1061.82 | 1160.15 | Down |
| Ckap2l   | 160.343 | 0.98555 | 0.34469 | 2.85926 | 0.00425  | 0.08595  | 106.446 | 141.421 | 75.0087 | 270.757 | 221.872 | 146.556 | Up   |
| Sirpa    | 5737.86 | 0.77708 | 0.27487 | 2.82707 | 0.0047   | 0.09231  | 5130.09 | 3982.53 | 3574.11 | 7001.88 | 9838.64 | 4899.88 | Up   |
| Tgm3     | 25.5742 | 1.58601 | 0.53533 | 2.96268 | 0.00305  | 0.06868  | 18.7266 | 9.88958 | 9.74139 | 42.9125 | 46.55   |         |      |

|           |         |         |         |         |          |          |         |         |         |         |         |         |      |
|-----------|---------|---------|---------|---------|----------|----------|---------|---------|---------|---------|---------|---------|------|
| Tmx4      | 2991.11 | -0.4424 | 0.16935 | -2.6122 | 0.00899  | 0.14086  | 3307.7  | 4122.97 | 2907.8  | 2379.6  | 2577.28 | 2651.33 | Down |
| Pak7      | 9.57146 | -1.9043 | 0.88759 | -2.1455 | 0.03192  | 0.31285  | 17.741  | 21.7571 | 5.84483 | 2.04345 | 5.94301 | 4.09946 | Down |
| Snap25    | 39.5178 | -2.369  | 0.5987  | -3.9569 | 7.59E-05 | 0.0043   | 44.3524 | 90.9841 | 63.319  | 4.0869  | 13.867  | 20.4973 | Down |
| Snx5      | 7400.69 | 0.27337 | 0.13678 | 1.99855 | 0.04566  | 0.38232  | 7254.08 | 6769.42 | 6081.55 | 7976.61 | 8937.29 | 7385.18 | Up   |
| Slc24a3   | 1451.99 | -0.6139 | 0.21022 | -2.9204 | 0.0035   | 0.07481  | 1438    | 2260.76 | 1570.31 | 1122.88 | 1071.72 | 1248.29 | Down |
| Ralgapa2  | 4590.32 | 0.40473 | 0.12166 | 3.3268  | 0.00088  | 0.02874  | 4290.35 | 3861.88 | 3699.78 | 5360.99 | 5485.39 | 4843.52 | Up   |
| Nkx2-2    | 3.61263 | -5.2778 | 1.79177 | -2.9456 | 0.00322  | 0.07154  | 10.8417 | 7.91166 | 2.92242 | 0       | 0       | 0       | Down |
| Zfp120    | 948.81  | 0.26126 | 0.13231 | 1.97453 | 0.04832  | 0.39416  | 808.199 | 948.411 | 832.888 | 1028.88 | 1088.56 | 985.921 | Up   |
| Cst7      | 130.336 | 0.90614 | 0.34813 | 2.60289 | 0.00924  | 0.14331  | 105.46  | 72.1939 | 94.4914 | 161.433 | 236.73  | 111.71  | Up   |
| Pygb      | 6112.73 | -0.5426 | 0.2373  | -2.2865 | 0.02222  | 0.2547   | 6333.52 | 9568.17 | 5844.83 | 4419.98 | 4522.63 | 5987.27 | Down |
| Gins1     | 151.928 | 0.5772  | 0.26133 | 2.20867 | 0.0272   | 0.28553  | 149.813 | 112.741 | 103.259 | 217.628 | 172.347 | 155.78  | Up   |
| Rspo4     | 66.5238 | -1.5127 | 0.45111 | -3.3532 | 0.0008   | 0.02658  | 122.215 | 57.3596 | 115.922 | 32.6952 | 22.7815 | 48.1687 | Down |
| Angpt4    | 80.5727 | -1.4129 | 0.45881 | -3.0795 | 0.00207  | 0.05192  | 74.9063 | 184.935 | 91.569  | 57.2166 | 29.715  | 45.0941 | Down |
| Rem1      | 351.885 | -0.5918 | 0.21691 | -2.7283 | 0.00637  | 0.11287  | 497.732 | 319.433 | 452     | 277.909 | 279.321 | 284.913 | Down |
| Tpx2      | 275.131 | 1.56825 | 0.3222  | 4.86725 | 1.13E-06 | 0.00014  | 153.755 | 167.134 | 95.4656 | 486.341 | 474.45  | 273.639 | Up   |
| Foxs1     | 123.049 | -1.0682 | 0.40401 | -2.6441 | 0.00819  | 0.13205  | 115.316 | 182.957 | 201.647 | 41.8907 | 97.0691 | 99.412  | Down |
| Hck       | 2786.7  | 0.47393 | 0.17876 | 2.65125 | 0.00802  | 0.13049  | 2760.69 | 2150.98 | 2087.58 | 3292    | 3634.15 | 2794.81 | Up   |
| Bpifa5    | 5.41895 | -5.8629 | 1.93348 | -3.0323 | 0.00243  | 0.05797  | 0.98561 | 23.735  | 7.79311 | 0       | 0       | 0       | Down |
| Bpifb1    | 8172.79 | -5.1742 | 1.04209 | -4.9652 | 6.86E-07 | 9.82E-05 | 5650.49 | 34874.6 | 7190.12 | 452.624 | 744.857 | 124.009 | Down |
| Bpifb5    | 344.758 | -0.628  | 0.25366 | -2.4756 | 0.0133   | 0.18144  | 341.021 | 524.148 | 390.63  | 297.322 | 208.996 | 306.435 | Down |
| Myh7b     | 24.6776 | -1.3484 | 0.65696 | -2.0525 | 0.04012  | 0.36086  | 22.669  | 53.4037 | 30.1983 | 17.3693 | 4.9525  | 19.4725 | Down |
| Cnbd2     | 1399.91 | 2.15323 | 0.39964 | 5.38788 | 7.13E-08 | 1.44E-05 | 481.963 | 512.28  | 547.466 | 2852.66 | 3103.24 | 901.882 | Up   |
| MyI9      | 5164.47 | -0.8378 | 0.35467 | -2.3623 | 0.01816  | 0.22436  | 3594.52 | 9133.03 | 7142.38 | 3018.18 | 3006.17 | 5092.56 | Down |
| Gm14276   | 47.2229 | 0.7369  | 0.35911 | 2.05202 | 0.04017  | 0.36086  | 36.4675 | 43.5142 | 26.3017 | 65.3904 | 60.4206 | 51.2433 | Up   |
| Rbl1      | 1197.39 | 0.39078 | 0.14776 | 2.64469 | 0.00818  | 0.13205  | 1170.9  | 991.925 | 945.889 | 1373.2  | 1452.07 | 1250.34 | Up   |
| Adig      | 121.718 | -1.4633 | 0.46534 | -3.1447 | 0.00166  | 0.04428  | 111.374 | 315.478 | 109.104 | 72.5425 | 63.3921 | 58.4174 | Down |
| Fam83d    | 85.7811 | 1.14287 | 0.40528 | 2.81994 | 0.0048   | 0.09345  | 50.266  | 74.1719 | 36.0431 | 130.781 | 147.585 | 75.8401 | Up   |
| Ptptr     | 121.097 | -0.9697 | 0.37878 | -2.56   | 0.01047  | 0.1561   | 112.359 | 218.56  | 150.017 | 67.4339 | 62.4016 | 115.81  | Down |
| Gtsf1l    | 56.3143 | -2.7876 | 0.83719 | -3.3297 | 0.00087  | 0.02858  | 41.3956 | 224.493 | 29.2242 | 10.2173 | 6.93351 | 25.6216 | Down |
| Jph2      | 1327.21 | -1.7705 | 0.37342 | -4.7413 | 2.12E-06 | 0.00025  | 1277.35 | 3476.19 | 1404.71 | 531.297 | 625.997 | 647.715 | Down |
| Slpi      | 2101.45 | 0.90173 | 0.45005 | 2.0036  | 0.04511  | 0.38075  | 2560.61 | 976.102 | 859.19  | 3616.27 | 2979.3  | 1617.24 | Up   |
| Rbpjl     | 3210.88 | 0.27054 | 0.12341 | 2.19221 | 0.02836  | 0.29075  | 2621.72 | 3031.16 | 3079.25 | 3569.91 | 3653.96 | 3309.29 | Up   |
| Wfdc13    | 256.574 | -1.2289 | 0.56453 | -2.1769 | 0.02949  | 0.29871  | 100.532 | 684.359 | 294.19  | 179.824 | 155.509 | 125.034 | Down |
| Ube2c     | 306.884 | 1.26837 | 0.32214 | 3.93729 | 8.24E-05 | 0.00461  | 174.453 | 223.505 | 142.224 | 587.492 | 433.839 | 279.788 | Up   |
| Cdh22     | 142.104 | -1.0054 | 0.36922 | -2.7229 | 0.00647  | 0.11397  | 151.784 | 287.787 | 129.56  | 78.6729 | 93.1071 | 111.71  | Down |
| Zfp663    | 108.205 | -0.9829 | 0.35924 | -2.736  | 0.00622  | 0.11063  | 194.165 | 142.41  | 94.4914 | 72.5425 | 56.4585 | 89.1633 | Down |
| Ocstamp   | 14.9548 | 1.83131 | 0.91198 | 2.00806 | 0.04464  | 0.37936  | 3.94243 | 11.8675 | 3.89655 | 11.239  | 48.5345 | 10.2487 | Up   |
| Fam210b   | 2185.01 | -0.2832 | 0.09572 | -2.9588 | 0.00309  | 0.06932  | 2388.13 | 2395.26 | 2412.94 | 1945.37 | 1917.61 | 2050.76 | Down |
| Aurka     | 230.501 | 0.5744  | 0.21351 | 2.69027 | 0.00714  | 0.12092  | 204.021 | 195.814 | 155.862 | 302.431 | 291.207 | 233.669 | Up   |
| Ctcflos   | 13.5075 | -4.2526 | 1.26578 | -3.3596 | 0.00078  | 0.02626  | 14.7841 | 57.3596 | 4.87069 | 0       | 1.981   | 2.04973 | Down |
| Pck1      | 639.813 | -5.906  | 1.35491 | -4.359  | 1.31E-05 | 0.00103  | 362.704 | 3175.54 | 237.69  | 4.0869  | 46.5535 | 12.2984 | Down |
| Zbp1      | 811.699 | 1.21248 | 0.4635  | 2.61594 | 0.0089   | 0.14016  | 541.099 | 563.706 | 363.354 | 901.162 | 2032.51 | 468.364 | Up   |
| Ctsz      | 9079.13 | 0.54811 | 0.226   | 2.4252  | 0.0153   | 0.1994   | 9043.95 | 6903.92 | 6177.01 | 10237.7 | 13448   | 8664.22 | Up   |
| Zfp972    | 431.003 | -0.5513 | 0.16444 | -3.3524 | 0.0008   | 0.02661  | 563.768 | 531.07  | 442.259 | 364.756 | 337.761 | 346.405 | Down |
| Tcf15     | 8.59011 | -1.8522 | 0.87261 | -2.1226 | 0.03378  | 0.32409  | 16.7553 | 13.8454 | 9.74139 | 2.04345 | 1.981   | 7.17406 | Down |
| Eef1a2    | 974.71  | -4.2278 | 1.85593 | -2.278  | 0.02273  | 0.25741  | 1066.43 | 3486.08 | 999.466 | 2.04345 | 292.198 | 2.04973 | Down |
| Zfp512b   | 304.271 | -0.4588 | 0.20636 | -2.2231 | 0.02621  | 0.28004  | 345.949 | 307.566 | 403.293 | 224.78  | 300.122 | 243.918 | Down |
| Pkia      | 2706.96 | -0.5231 | 0.20357 | -2.5697 | 0.01018  | 0.15318  | 2569.48 | 4079.45 | 2928.26 | 2208.97 | 2083.02 | 2372.56 | Down |
| Hey1      | 5517.36 | 0.40436 | 0.11201 | 3.61009 | 0.00031  | 0.01306  | 4393.84 | 4888.42 | 4965.18 | 6275.44 | 5965.79 | 6615.51 | Up   |
| Fabp5     | 5151.94 | 0.55824 | 0.21796 | 2.56125 | 0.01043  | 0.15565  | 4270.64 | 4508.66 | 3723.16 | 4788.83 | 7978.48 | 5641.89 | Up   |
| Fabp4     | 2762.89 | -2.4228 | 0.96888 | -2.5006 | 0.0124   | 0.17252  | 2667.06 | 9410.93 | 1893.73 | 518.015 | 1773    | 314.634 | Down |
| Raly1     | 59.107  | -1.4638 | 0.66968 | -2.1858 | 0.02883  | 0.29409  | 52.2373 | 166.145 | 41.888  | 15.3259 | 25.753  | 53.293  | Down |
| Car3      | 4486.77 | -6.6375 | 0.99243 | -6.6881 | 2.26E-11 | 9.97E-09 | 5953.08 | 16604.6 | 4095.28 | 32.6952 | 199.091 | 35.8703 | Down |
| A930001A  | 434.486 | 0.98893 | 0.40611 | 2.43514 | 0.01489  | 0.19589  | 198.107 | 205.703 | 469.535 | 560.927 | 378.371 | 794.271 | Up   |
| Sirpb1a   | 200.653 | 1.10127 | 0.40956 | 2.6889  | 0.00717  | 0.12123  | 157.697 | 136.476 | 88.6466 | 257.475 | 415.02  | 148.606 | Up   |
| Sirpb1b   | 272.448 | 0.84793 | 0.4154  | 2.04123 | 0.04123  | 0.36578  | 263.158 | 212.626 | 108.129 | 293.235 | 526.946 | 230.595 | Up   |
| Dnajc5b   | 23.5106 | -1.4048 | 0.66188 | -2.1225 | 0.0338   | 0.32409  | 23.6546 | 51.4258 | 27.2759 | 10.2173 | 5.94301 | 22.547  | Down |
| Trim55    | 230.577 | -2.8597 | 0.64578 | -4.4283 | 9.50E-06 | 0.00081  | 227.676 | 746.663 | 241.586 | 17.3693 | 43.582  | 106.586 | Down |
| Cpa3      | 430.566 | -0.9891 | 0.44977 | -2.1992 | 0.02787  | 0.2884   | 207.963 | 847.537 | 662.414 | 255.431 | 258.521 | 351.529 | Down |
| Nlgn1     | 241.013 | -4.0959 | 1.12758 | -3.4931 | 0.00048  | 0.01831  | 25.6258 | 724.906 | 615.656 | 13.2824 | 29.715  | 36.8952 | Down |
| Ect2      | 331.323 | 0.85746 | 0.22884 | 3.74701 | 0.00018  | 0.00868  | 239.503 | 252.184 | 215.285 | 546.623 | 368.466 | 365.877 | Up   |
| Pld1      | 1901.92 | 0.35352 | 0.16045 | 2.20334 | 0.02757  | 0.28707  | 1720.87 | 1741.56 | 1547.91 | 2101.69 | 2475.26 | 1824.26 | Up   |
| Usp13     | 470.892 | -0.9507 | 0.29504 | -3.2221 | 0.00127  | 0.03687  | 649.516 | 826.769 | 385.759 | 320.822 | 357.571 | 284.913 | Down |
| Ccna2     | 298.708 | 0.94441 | 0.35535 | 2.65768 | 0.00787  | 0.12853  | 230.632 | 222.516 | 159.759 | 503.711 | 465.535 | 210.098 | Up   |
| Rpl31-ps1 | 11.0548 | -2.1642 | 1.06872 | -2.025  | 0.04287  | 0.37291  | 34.4963 | 17.8012 | 1.94828 | 3.06518 | 5.94301 | 3.0746  | Down |
| Gm36823   | 4.27105 | -2.8953 | 1.21592 | -2.3812 | 0.01726  | 0.21705  | 6.89926 | 6.92271 | 8.76725 | 1.02173 | 0.9905  | 1.02487 | Down |
| Platr4    | 7.90368 | -2.7591 | 1.36679 | -2.0187 | 0.04352  | 0.37421  | 1.97122 | 24.724  | 14.6121 | 0       | 0.9905  | 5.12433 | Down |
| Pcdh18    | 2050.08 | -0.5094 | 0.14521 | -3.508  | 0.00045  | 0.01757  | 2130.89 | 2346.8  | 2747.07 | 1757.37 | 1599.66 | 1718.7  | Down |
| Gm6209    | 19.9833 | 1.81212 | 0.74767 | 2.42368 | 0.01536  | 0.19982  | 10.8417 | 11.8675 | 3.89655 | 19.4128 | 56.4585 | 17.4227 | Up   |
| Ndufc1    | 789.311 | -0.4811 | 0.23262 | -2.0682 | 0.03862  | 0.35249  | 826.926 | 1066.1  | 866.009 | 620.187 | 510.108 | 846.539 | Down |
| Gm10727   | 24.8967 | -1.6491 | 0.82617 | -1.9961 | 0.04592  | 0.38348  | 43.3668 | 52.4148 | 17.5345 | 2.04345 | 23.772  | 10.2487 | Down |
| Gm6394    | 9.86592 | -2.1104 | 0.94399 | -2.2356 | 0.02538  | 0.27515  | 20.6978 | 5.93375 | 21.431  | 1.02173 | 3.962   | 6.1492  | Down |
| Sucnr1    | 12.0069 | -4.5001 | 1.26304 | -3.5629 | 0.00037  | 0.01496  | 12.8129 | 42.5252 | 13.6379 | 3.06518 | 0       | 0       | Down |
| Rap2b     | 505.056 | 0.42223 | 0.19151 | 2.20472 | 0.02747  | 0.28689  | 492.804 | 430.197 | 372.121 | 586.47  | 653.731 | 495.01  | Up   |
| Veph1     | 96.6317 | 0.89669 | 0.26318 | 3.40712 | 0.00066  | 0.02324  | 67.0214 | 80.1056 | 55.5259 | 117.498 | 137.68  | 121.959 | Up   |
| Shox2     | 40.1275 | -4.86   | 1.00409 | -4.8402 | 1.30E-06 | 0.00016  | 55.1941 | 151.311 | 26.3017 | 0       | 6.93351 | 1.02487 | Down |
| Smc4      | 3606.23 | 0.3213  | 0.12077 | 2.66038 | 0.00781  | 0.12796  | 3322.49 | 3036.1  | 3260.44 | 4002.1  | 4349.29 | 3666.97 | Up   |
| B3galnt1  | 669.846 | -0.419  | 0.21237 | -1.9728 | 0.04     |          |         |         |         |         |         |         |      |



|          |         |         |         |         |          |          |         |         |         |         |         |         |      |
|----------|---------|---------|---------|---------|----------|----------|---------|---------|---------|---------|---------|---------|------|
| Pitx2    | 40.7385 | -4.8863 | 1.00077 | -4.8826 | 1.05E-06 | 0.00013  | 86.7336 | 113.73  | 36.0431 | 0       | 7.92401 | 0       | Down |
| Elovf6   | 547.225 | -0.8886 | 0.37025 | -2.3999 | 0.0164   | 0.21065  | 475.063 | 1159.06 | 497.785 | 311.626 | 459.592 | 380.225 | Down |
| Egf      | 115.45  | -1.6918 | 0.457   | -3.7019 | 0.00021  | 0.00987  | 113.345 | 304.599 | 111.052 | 52.108  | 62.4016 | 49.1936 | Down |
| 6330410L | 11.4977 | -5.0618 | 1.61387 | -3.1364 | 0.00171  | 0.04532  | 1.97122 | 49.4479 | 15.5862 | 0       | 1.981   | 0       | Down |
| Cyp2u1   | 212.223 | -0.6443 | 0.29948 | -2.1514 | 0.03144  | 0.31047  | 212.891 | 361.959 | 201.647 | 172.672 | 138.67  | 185.501 | Down |
| Sgms2    | 991.903 | -0.4871 | 0.23314 | -2.0891 | 0.0367   | 0.3402   | 955.055 | 1364.76 | 1153.38 | 758.12  | 668.588 | 1051.51 | Down |
| Gm29865  | 20.7351 | -1.9687 | 0.6045  | -3.2567 | 0.00113  | 0.0339   | 27.597  | 24.724  | 46.7587 | 5.10863 | 7.92401 | 12.2984 | Down |
| Dkk2     | 59.0999 | -1.665  | 0.46623 | -3.5711 | 0.00036  | 0.01465  | 49.2804 | 140.432 | 79.8794 | 27.5866 | 28.7245 | 28.6962 | Down |
| Cenpe    | 130.002 | 1.20519 | 0.29791 | 4.0455  | 5.22E-05 | 0.00326  | 72.935  | 91.9731 | 71.1121 | 187.997 | 225.834 | 130.158 | Up   |
| Manba    | 2031.44 | 0.48967 | 0.15474 | 3.16448 | 0.00155  | 0.04258  | 1935.74 | 1715.84 | 1418.35 | 2419.45 | 2326.69 | 2372.56 | Up   |
| Slc39a8  | 13456.4 | 0.40054 | 0.16954 | 2.36249 | 0.01815  | 0.22436  | 14008.5 | 10046.8 | 10745.7 | 15406.6 | 16366   | 14164.7 | Up   |
| Gm43357  | 1.85392 | 4.35832 | 2.05246 | 2.12347 | 0.03371  | NA       | 0       | 0       | 0       | 4.0869  | 3.962   | 3.0746  | Up   |
| Lamtor3  | 3618.48 | 0.24047 | 0.10131 | 2.37355 | 0.01762  | 0.22001  | 3502.85 | 3202.25 | 3247.78 | 3995.97 | 3996.67 | 3765.36 | Up   |
| Dapp1    | 1146.84 | 0.87734 | 0.24219 | 3.62254 | 0.00029  | 0.01265  | 1093.04 | 707.105 | 625.397 | 1371.16 | 1668.99 | 1415.34 | Up   |
| 1110002E | 81.62   | -3.563  | 0.65814 | -5.4138 | 6.17E-08 | 1.26E-05 | 115.316 | 272.952 | 63.319  | 7.15208 | 22.7815 | 8.19893 | Down |
| Adh6b    | 58.7656 | -1.5373 | 0.49429 | -3.1101 | 0.00187  | 0.04831  | 44.3524 | 105.819 | 112.026 | 41.8907 | 19.81   | 28.6962 | Down |
| Rap1gds1 | 3794.17 | 0.34092 | 0.16664 | 2.04586 | 0.04077  | 0.36329  | 3650.69 | 3183.46 | 3209.79 | 4697.89 | 4562.25 | 3460.97 | Up   |
| Unc5c    | 752.42  | -0.3336 | 0.16467 | -2.026  | 0.04276  | 0.37291  | 876.206 | 799.078 | 841.656 | 726.447 | 552.699 | 718.431 | Down |
| Gbp5     | 1257.59 | 1.35182 | 0.44315 | 3.05048 | 0.00228  | 0.05531  | 882.12  | 585.463 | 656.569 | 1458    | 3184.46 | 778.898 | Up   |
| Gbp7     | 3385.64 | 0.74363 | 0.32291 | 2.30293 | 0.02128  | 0.24897  | 2535.97 | 2545.58 | 2514.25 | 3693.54 | 6541.27 | 2483.25 | Up   |
| Gbp3     | 2152.7  | 0.94635 | 0.31587 | 2.99602 | 0.00274  | 0.0628   | 1541.49 | 1600.13 | 1271.25 | 2495.05 | 4269.06 | 1739.2  | Up   |
| Gbp2b    | 36.7087 | 0.90449 | 0.40357 | 2.24125 | 0.02501  | 0.27341  | 28.5827 | 26.7019 | 21.431  | 56.1949 | 52.4965 | 34.8454 | Up   |
| Gbp2     | 5404.28 | 0.98372 | 0.29871 | 3.29318 | 0.00099  | 0.03127  | 3909.91 | 3479.15 | 3501.05 | 6387.83 | 10656.8 | 4490.96 | Up   |
| Gm42705  | 9.2793  | 2.39929 | 0.95911 | 2.50158 | 0.01236  | 0.17237  | 1.97122 | 5.93375 | 0.97414 | 23.4997 | 7.92401 | 15.373  | Up   |
| Ddah1    | 2040.76 | 0.4498  | 0.15863 | 2.8355  | 0.00458  | 0.09104  | 1590.77 | 1757.38 | 1827.48 | 2406.16 | 2669.4  | 1993.36 | Up   |
| Bcl10    | 2872.16 | 0.25263 | 0.10298 | 2.45321 | 0.01416  | 0.18932  | 2786.32 | 2567.34 | 2510.36 | 3195.96 | 3125.03 | 3047.95 | Up   |
| Adgrl4   | 17501.5 | 0.4661  | 0.19705 | 2.3654  | 0.01801  | 0.22379  | 16812.5 | 12923.7 | 14359.8 | 20321.1 | 24406.9 | 16184.7 | Up   |
| Ifi44l   | 86.6534 | -6.6671 | 0.80725 | -8.2591 | 1.47E-16 | 1.38E-13 | 96.5897 | 282.842 | 135.405 | 2.04345 | 0.9905  | 2.04973 | Down |
| Ptgr     | 1070.45 | -0.7463 | 0.2864  | -2.6058 | 0.00917  | 0.14264  | 1252.71 | 1876.05 | 895.233 | 806.141 | 918.194 | 674.362 | Down |
| Gm43618  | 60.2858 | -0.9839 | 0.42645 | -2.3072 | 0.02104  | 0.24709  | 68.007  | 118.675 | 53.5776 | 50.0645 | 39.62   | 31.7708 | Down |
| Dnajb4   | 6265.58 | -0.2421 | 0.12202 | -1.984  | 0.04726  | 0.38984  | 6254.67 | 7344.99 | 6770.26 | 5807.49 | 5343.75 | 6072.33 | Down |
| Nexn     | 2422.24 | -1.1119 | 0.29909 | -3.7176 | 0.0002   | 0.00944  | 2328.01 | 5016    | 2592.18 | 1407.94 | 1684.84 | 1504.5  | Down |
| Miga1    | 2265.91 | -0.2759 | 0.09939 | -2.776  | 0.0055   | 0.10317  | 2377.29 | 2467.45 | 2600.95 | 2075.12 | 2045.38 | 2029.23 | Down |
| Zzz3     | 3307.02 | 0.25209 | 0.12413 | 2.03088 | 0.04227  | 0.37149  | 3374.72 | 2769.08 | 2912.67 | 3590.34 | 3582.64 | 3612.65 | Up   |
| Ak5      | 90.5944 | -0.9115 | 0.34046 | -2.6773 | 0.00742  | 0.12358  | 148.827 | 105.819 | 100.336 | 46.9994 | 84.1926 | 57.3925 | Down |
| Acadm    | 6396.8  | -0.7221 | 0.23946 | -3.0154 | 0.00257  | 0.06011  | 6386.74 | 10927   | 6581.28 | 4634.55 | 4484    | 5367.22 | Down |
| Cryz     | 809.907 | -0.4382 | 0.12147 | -3.6073 | 0.00031  | 0.0131   | 925.487 | 976.102 | 894.259 | 725.455 | 658.683 | 679.486 | Down |
| Tnni3k   | 198.409 | -2.9552 | 0.52779 | -5.5992 | 2.15E-08 | 5.00E-06 | 220.776 | 644.801 | 188.983 | 30.6518 | 68.3446 | 36.8952 | Down |
| 4930570G | 37.5964 | 1.91853 | 0.42069 | 4.56045 | 5.10E-06 | 0.00052  | 19.7122 | 12.8565 | 14.6121 | 73.5642 | 50.5155 | 54.3179 | Up   |
| Negr1    | 298.527 | 0.87885 | 0.29397 | 2.98956 | 0.00279  | 0.06378  | 238.517 | 255.151 | 137.354 | 371.908 | 469.497 | 318.733 | Up   |
| Gm20752  | 39.8952 | 3.47996 | 0.77336 | 4.49978 | 6.80E-06 | 0.00065  | 11.8273 | 5.93375 | 1.94828 | 58.2383 | 132.727 | 28.6962 | Up   |
| Depdc1a  | 54.5863 | 1.58807 | 0.48313 | 3.287   | 0.00101  | 0.03169  | 27.597  | 40.5473 | 13.6379 | 103.194 | 86.1736 | 56.3676 | Up   |
| Penk     | 176.989 | -1.9255 | 0.28392 | -6.7818 | 1.19E-11 | 5.34E-09 | 212.891 | 357.014 | 270.811 | 66.4121 | 87.1641 | 67.6411 | Down |
| 4930430E | 81.0716 | 2.24464 | 0.71671 | 3.13185 | 0.00174  | 0.04597  | 41.3956 | 35.6025 | 7.79311 | 84.8032 | 261.492 | 55.3428 | Up   |
| Tox      | 144.239 | 1.13692 | 0.29282 | 3.8827  | 0.0001   | 0.00554  | 107.431 | 92.9621 | 70.138  | 254.41  | 170.366 | 170.128 | Up   |
| Car8     | 7894.52 | 0.3438  | 0.13287 | 2.58755 | 0.00967  | 0.14804  | 7603.97 | 7100.72 | 6170.19 | 8488.49 | 8509.39 | 9494.36 | Up   |
| Asph     | 4232.77 | -0.5209 | 0.19788 | -2.6321 | 0.00848  | 0.13561  | 4114.92 | 6113.74 | 4737.24 | 3306.3  | 3115.13 | 4009.28 | Down |
| Gm11814  | 11.3283 | 4.02375 | 1.04317 | 3.85723 | 0.00011  | 0.006    | 0       | 2.96687 | 0.97414 | 29.63   | 12.8765 | 21.5222 | Up   |
| Gm12918  | 439.489 | 0.36969 | 0.1825  | 2.02574 | 0.04279  | 0.37291  | 373.546 | 425.252 | 351.664 | 432.19  | 481.383 | 572.9   | Up   |
| Pdp1     | 1678.81 | -0.3511 | 0.11111 | -3.1603 | 0.00158  | 0.04279  | 1799.72 | 1995.72 | 1850.86 | 1448.81 | 1432.26 | 1545.5  | Down |
| Fut9     | 48.0531 | -2.645  | 0.86453 | -3.0595 | 0.00222  | 0.05418  | 27.597  | 182.957 | 37.9914 | 8.1738  | 4.9525  | 26.6465 | Down |
| Rragd    | 1362.4  | -0.5415 | 0.26406 | -2.0506 | 0.04031  | 0.36148  | 1673.56 | 2012.53 | 1159.22 | 913.422 | 1002.39 | 1413.29 | Down |
| Cnr1     | 140.549 | -0.7484 | 0.37451 | -1.9984 | 0.04567  | 0.38232  | 109.403 | 222.516 | 196.776 | 102.173 | 139.661 | 72.7655 | Down |
| Tmem215  | 22.6759 | -1.0364 | 0.47701 | -2.1728 | 0.0298   | 0.30054  | 36.4675 | 28.6798 | 26.3017 | 13.2824 | 12.8765 | 18.4476 | Down |
| Aqp7     | 37.719  | -4.0218 | 0.90425 | -4.4477 | 8.68E-06 | 0.00075  | 28.5827 | 164.167 | 20.4569 | 3.06518 | 5.94301 | 4.09946 | Down |
| Aqp3     | 114.156 | -1.821  | 0.74915 | -2.4308 | 0.01506  | 0.19718  | 52.2373 | 418.329 | 63.319  | 43.9342 | 73.2971 | 33.8206 | Down |
| Myorg    | 1009.09 | -0.2725 | 0.11856 | -2.2986 | 0.02153  | 0.25004  | 1054.6  | 1158.07 | 1099.8  | 886.858 | 968.71  | 886.509 | Down |
| Dnaic1   | 2102.92 | -0.754  | 0.38107 | -1.9786 | 0.04786  | 0.3921   | 1800.71 | 3148.84 | 2971.12 | 1367.07 | 857.774 | 2471.98 | Down |
| Cntfr    | 513.959 | -0.75   | 0.2834  | -2.6465 | 0.00813  | 0.13167  | 558.84  | 882.151 | 492.914 | 468.972 | 373.419 | 307.46  | Down |
| Atp8b5   | 172.405 | -1.1626 | 0.47512 | -2.4469 | 0.01441  | 0.19196  | 159.669 | 392.616 | 162.681 | 136.911 | 55.468  | 127.083 | Down |
| Cd72     | 464.14  | 0.79633 | 0.26194 | 3.04019 | 0.00236  | 0.05679  | 411.984 | 307.566 | 298.086 | 715.208 | 635.902 | 416.096 | Up   |
| Arhgef39 | 212.811 | 1.15121 | 0.2285  | 5.03809 | 4.70E-07 | 7.15E-05 | 148.827 | 144.388 | 103.259 | 324.909 | 295.169 | 260.316 | Up   |
| Tpm2     | 3017.71 | -0.555  | 0.24296 | -2.2841 | 0.02237  | 0.25524  | 2645.37 | 4386.03 | 3741.67 | 2488.92 | 1928.51 | 2915.74 | Down |
| Tmem8b   | 809.089 | -0.2888 | 0.12847 | -2.2482 | 0.02457  | 0.27053  | 898.875 | 812.924 | 957.578 | 737.686 | 728.018 | 719.456 | Down |
| Olfr157  | 2.02473 | 4.48527 | 1.99077 | 2.25304 | 0.02426  | NA       | 0       | 0       | 0       | 4.0869  | 3.962   | 4.09946 | Up   |
| Gm12411  | 1182.58 | 0.27515 | 0.12171 | 2.26067 | 0.02378  | 0.2647   | 1104.87 | 1064.12 | 1041.35 | 1322.11 | 1186.62 | 1376.39 | Up   |
| Aldh1b1  | 425.469 | -2.9152 | 0.57956 | -5.0299 | 4.91E-07 | 7.41E-05 | 559.826 | 1317.29 | 376.992 | 68.4556 | 187.205 | 43.0444 | Down |
| Igfbpl1  | 17.4158 | -3.2289 | 0.81244 | -3.9743 | 7.06E-05 | 0.00409  | 39.4243 | 32.6356 | 22.4052 | 4.0869  | 5.94301 | 0       | Down |
| Stra6l   | 180.59  | 2.35651 | 1.08782 | 2.16627 | 0.03029  | 0.30382  | 90.676  | 41.5362 | 44.8104 | 109.325 | 742.876 | 54.3179 | Up   |
| Trim14   | 1551.11 | 0.45725 | 0.18259 | 2.50418 | 0.01227  | 0.17177  | 1278.33 | 1296.52 | 1347.23 | 1942.3  | 2046.37 | 1395.87 | Up   |
| Anks6    | 287.648 | -0.3838 | 0.18319 | -2.0949 | 0.03618  | 0.33807  | 317.366 | 346.135 | 313.673 | 220.693 | 289.226 | 238.794 | Down |
| Tgfbfr1  | 3431.72 | 0.43348 | 0.20078 | 2.15898 | 0.03085  | 0.30729  | 3152.96 | 2666.23 | 2940.92 | 3885.62 | 4879.21 | 3065.37 | Up   |
| Erp44    | 5437.51 | 0.24789 | 0.09134 | 2.71404 | 0.00665  | 0.11573  | 5186.27 | 4910.18 | 4818.09 | 5962.79 | 5946.97 | 5800.74 | Up   |
| Cavin4   | 74.0102 | -1.6739 | 0.6315  | -2.6507 | 0.00803  | 0.13053  | 52.2373 | 226.471 | 59.4225 | 21.4562 | 46.5535 | 37.92   | Down |
| Acnat1   | 23.3846 | -2.9309 | 0.95688 | -3.063  | 0.00219  | 0.0539   | 6.89926 | 80.1056 | 37.0173 | 3.06518 | 2.9715  | 10.2487 | Down |
| Grin3a   | 128.162 | -0.5198 | 0.26033 | -1.9967 | 0.04585  | 0.38322  | 116.302 | 170.101 | 166.578 | 97.0639 | 100.041 | 118.884 | Down |
| Smc2os   | 9.08075 | 2.01806 | 1.01935 | 1.97976 | 0.04773  | 0.39169  | 0       | 3.95583 | 6.81897 | 16.3476 | 8.91451 | 18.4476 | Up   |
| Smc2     | 695.664 | 0.41992 | 0.20601 | 2.0     |          |          |         |         |         |         |         |         |      |

|           |         |         |         |         |          |          |         |         |         |         |         |         |      |
|-----------|---------|---------|---------|---------|----------|----------|---------|---------|---------|---------|---------|---------|------|
| Orm3      | 72.4135 | -0.5673 | 0.26039 | -2.1787 | 0.02935  | 0.29757  | 82.7911 | 85.0504 | 91.569  | 55.1732 | 59.4301 | 60.4671 | Down |
| Tmem268   | 1237.59 | 0.45711 | 0.18941 | 2.4134  | 0.0158   | 0.204    | 1139.36 | 1044.34 | 945.889 | 1330.29 | 1752.2  | 1213.44 | Up   |
| Tnfsf8    | 205.736 | 1.40229 | 0.32496 | 4.31522 | 1.59E-05 | 0.00121  | 91.6616 | 113.73  | 133.457 | 316.735 | 390.257 | 188.575 | Up   |
| Tnc       | 513.601 | 0.62036 | 0.30551 | 2.03055 | 0.0423   | 0.37149  | 340.035 | 432.175 | 442.259 | 883.792 | 399.172 | 584.174 | Up   |
| Tle1      | 4066.49 | 0.39152 | 0.15783 | 2.48069 | 0.01311  | 0.17956  | 3642.81 | 3507.83 | 3403.64 | 5162.78 | 4896.05 | 3785.85 | Up   |
| C630043F  | 465.131 | 0.41829 | 0.1794  | 2.33165 | 0.01972  | 0.23657  | 441.553 | 387.672 | 365.302 | 610.992 | 521.003 | 464.264 | Up   |
| Frmd3     | 21.6589 | -1.3615 | 0.59055 | -2.3054 | 0.02114  | 0.24787  | 26.6114 | 47.47   | 19.4828 | 8.1738  | 13.867  | 14.3481 | Down |
| Gm5860    | 25.0595 | -1.6448 | 0.60315 | -2.7271 | 0.00639  | 0.11296  | 24.6402 | 42.5252 | 46.7587 | 5.10863 | 12.8765 | 18.4476 | Down |
| Gm12551   | 12.2708 | 4.14806 | 0.93155 | 4.45284 | 8.47E-06 | 0.00075  | 1.97122 | 0.98896 | 0.97414 | 20.4345 | 27.734  | 21.5222 | Up   |
| Dennd4c   | 2035.04 | 0.40538 | 0.18932 | 2.14121 | 0.03226  | 0.31492  | 2031.34 | 1709.91 | 1511.86 | 2350.99 | 2676.33 | 1929.82 | Up   |
| Slc24a2   | 102.87  | -1.806  | 0.49651 | -3.6373 | 0.00028  | 0.01204  | 135.028 | 268.997 | 75.9828 | 34.7387 | 59.4301 | 43.0444 | Down |
| Mrpl48-ps | 258.035 | -0.8681 | 0.36817 | -2.3577 | 0.01839  | 0.22573  | 245.417 | 372.837 | 381.862 | 260.54  | 101.031 | 186.526 | Down |
| Klhl9     | 4637.31 | 0.43624 | 0.11167 | 3.90644 | 9.37E-05 | 0.00511  | 3791.64 | 4235.71 | 3797.19 | 5601.1  | 5347.71 | 5050.54 | Up   |
| Gm13274   | 21.9339 | 2.11787 | 0.72232 | 2.93203 | 0.00337  | 0.07357  | 6.89926 | 15.8233 | 1.94828 | 28.6083 | 46.5535 | 31.7708 | Up   |
| Gm13284   | 6.07255 | 4.13056 | 1.36871 | 3.01784 | 0.00255  | 0.05989  | 1.97122 | 0       | 0       | 12.2607 | 9.90501 | 12.2984 | Up   |
| Cdkn2a    | 77.6221 | 0.89261 | 0.2771  | 3.22129 | 0.00128  | 0.03689  | 54.2085 | 44.5031 | 64.2931 | 99.1074 | 98.0596 | 105.561 | Up   |
| Dmrta1    | 19.4626 | 1.91024 | 0.58673 | 3.25573 | 0.00113  | 0.03397  | 8.87048 | 3.95583 | 11.6897 | 35.7604 | 25.753  | 30.746  | Up   |
| Gm12666   | 20.2945 | -5.8946 | 1.31739 | -4.4744 | 7.66E-06 | 0.0007   | 10.8417 | 54.3927 | 54.5518 | 0       | 1.981   | 0       | Down |
| Tusc1     | 264.021 | -0.8622 | 0.2307  | -3.7371 | 0.00019  | 0.00897  | 396.215 | 277.897 | 347.767 | 164.498 | 174.328 | 223.421 | Down |
| Eqtn      | 29.4242 | 1.25142 | 0.59755 | 2.09426 | 0.03624  | 0.33832  | 13.7985 | 30.6577 | 7.79311 | 48.0211 | 46.5535 | 29.7211 | Up   |
| Jun       | 14892.4 | 0.27672 | 0.12606 | 2.19516 | 0.02815  | 0.28977  | 12616.8 | 14782   | 13006.7 | 17533.8 | 15100.2 | 16314.8 | Up   |
| Junos     | 717.985 | 1.17471 | 0.35569 | 3.30262 | 0.00096  | 0.03049  | 307.51  | 711.061 | 303.931 | 847.01  | 930.08  | 1208.32 | Up   |
| Gm830     | 101.964 | 1.83275 | 0.53005 | 3.4577  | 0.00054  | 0.02037  | 38.4387 | 80.1056 | 15.5862 | 192.084 | 128.765 | 156.804 | Up   |
| Fggy      | 480.367 | 1.2558  | 0.41918 | 2.99587 | 0.00274  | 0.0628   | 483.934 | 229.438 | 137.354 | 678.426 | 554.68  | 798.371 | Up   |
| Cachd1    | 1645.42 | 0.35077 | 0.12527 | 2.80006 | 0.00511  | 0.09747  | 1536.56 | 1296.52 | 1506.02 | 1892.24 | 1865.11 | 1776.09 | Up   |
| Raver2    | 3385.4  | -0.3561 | 0.13871 | -2.5673 | 0.01025  | 0.15358  | 3690.12 | 3509.81 | 4203.41 | 3153.04 | 3091.35 | 2664.65 | Down |
| B020004J  | 5.65547 | 2.56523 | 1.20537 | 2.12816 | 0.03332  | 0.32227  | 1.97122 | 0.98896 | 1.94828 | 3.06518 | 19.81   | 6.1492  | Up   |
| InsI5     | 59.8408 | -2.1988 | 0.56872 | -3.8663 | 0.00011  | 0.00585  | 87.7192 | 98.8958 | 108.129 | 30.6518 | 4.9525  | 28.6962 | Down |
| Plpp3     | 13865.6 | -0.3036 | 0.14924 | -2.0341 | 0.04194  | 0.37014  | 13691.1 | 15597.8 | 16668.5 | 12006.3 | 14062.1 | 11168   | Down |
| Pcsk9     | 13.0452 | -1.9334 | 0.81187 | -2.3814 | 0.01724  | 0.21705  | 14.7841 | 31.6467 | 15.5862 | 2.04345 | 3.962   | 10.2487 | Down |
| Dio1      | 135.281 | -1.3223 | 0.43887 | -3.0129 | 0.00259  | 0.06041  | 214.863 | 232.405 | 132.483 | 60.2818 | 44.5725 | 127.083 | Down |
| Shisal2a  | 234.887 | -0.9358 | 0.46048 | -2.0321 | 0.04214  | 0.37113  | 240.489 | 332.29  | 352.638 | 128.737 | 72.3066 | 282.863 | Down |
| Txndc12   | 2919.42 | 0.32546 | 0.09906 | 3.28531 | 0.00102  | 0.03178  | 2694.65 | 2514.92 | 2564.91 | 3208.22 | 3151.77 | 3382.06 | Up   |
| Ttc39a    | 2393.89 | -0.7384 | 0.2921  | -2.5278 | 0.01148  | 0.16493  | 2607.92 | 3478.17 | 2894.17 | 1564.26 | 1206.43 | 2612.38 | Down |
| Skint8    | 8.1437  | 3.50787 | 1.41376 | 2.48123 | 0.01309  | 0.17941  | 0       | 3.95583 | 0       | 16.3476 | 3.962   | 24.5968 | Up   |
| Skint3    | 101.722 | -1.1338 | 0.46372 | -2.4449 | 0.01449  | 0.19279  | 133.057 | 188.891 | 97.4139 | 36.7821 | 104.993 | 49.1936 | Down |
| Mknk1     | 2922.66 | 0.28948 | 0.14295 | 2.02508 | 0.04286  | 0.37291  | 2771.53 | 2518.88 | 2600.95 | 3360.45 | 3525.19 | 2758.94 | Up   |
| Ptch2     | 179.321 | -0.5574 | 0.25962 | -2.147  | 0.03179  | 0.3119   | 173.467 | 229.438 | 237.69  | 179.824 | 138.67  | 116.835 | Down |
| Kif2c     | 84.2648 | 1.41769 | 0.50815 | 2.78988 | 0.00527  | 0.09983  | 50.266  | 50.4369 | 37.0173 | 187.997 | 132.727 | 47.1438 | Up   |
| Cdc20     | 406.002 | 1.03424 | 0.19465 | 5.31346 | 1.08E-07 | 2.00E-05 | 271.042 | 270.975 | 257.173 | 664.121 | 499.212 | 473.488 | Up   |
| Tie1      | 16489.7 | 0.2808  | 0.14005 | 2.00501 | 0.04496  | 0.38034  | 14487.5 | 13574.4 | 16608.1 | 18778.3 | 19264.3 | 16225.7 | Up   |
| Olfr1343- | 3.37714 | 5.22322 | 1.74307 | 2.99657 | 0.00273  | 0.0628   | 0       | 0       | 0       | 9.19553 | 5.94301 | 5.12433 | Up   |
| Gm12877   | 37.1984 | 1.90186 | 0.42741 | 4.44969 | 8.60E-06 | 0.00075  | 11.8273 | 12.8565 | 22.4052 | 64.3687 | 58.4396 | 53.293  | Up   |
| Ppt1      | 5828.03 | 0.62789 | 0.17605 | 3.56652 | 0.00036  | 0.01481  | 5046.32 | 4479.98 | 4212.18 | 7084.64 | 8334.07 | 5810.99 | Up   |
| Cap1      | 15974.4 | 0.36477 | 0.14537 | 2.5092  | 0.0121   | 0.17068  | 15213.9 | 13554.7 | 13128.5 | 17733.1 | 20364.7 | 15851.6 | Up   |
| Ndufs5    | 1616.42 | -0.4996 | 0.22544 | -2.2161 | 0.02669  | 0.28205  | 1616.4  | 2075.82 | 1988.22 | 1294.53 | 1020.22 | 1703.33 | Down |
| Rhbdl2    | 46.3279 | -1.909  | 0.55812 | -3.4204 | 0.00063  | 0.02243  | 44.3524 | 121.642 | 53.5776 | 16.3476 | 28.7245 | 13.3233 | Down |
| Cdca8     | 169.379 | 1.28839 | 0.36863 | 3.49504 | 0.00047  | 0.01821  | 110.388 | 114.719 | 70.138  | 326.952 | 250.597 | 143.481 | Up   |
| Grik3     | 105.134 | -0.7282 | 0.31885 | -2.2838 | 0.02239  | 0.25524  | 173.467 | 115.708 | 104.233 | 82.7598 | 92.1166 | 62.5168 | Down |
| Lsm10     | 775.512 | 0.34247 | 0.14779 | 2.31734 | 0.02048  | 0.2424   | 676.128 | 647.768 | 727.682 | 821.467 | 802.306 | 977.722 | Up   |
| Clspn     | 87.3204 | 1.33743 | 0.45867 | 2.91589 | 0.00355  | 0.07546  | 68.9926 | 45.4921 | 34.0948 | 155.302 | 156.499 | 63.5417 | Up   |
| Gjb3      | 131.246 | 0.6423  | 0.23185 | 2.77028 | 0.0056   | 0.10454  | 110.388 | 90.9841 | 106.181 | 150.194 | 185.224 | 144.506 | Up   |
| Rnf19b    | 2997.63 | 0.3832  | 0.16114 | 2.378   | 0.01741  | 0.21817  | 2867.14 | 2381.41 | 2557.11 | 3282.8  | 3930.31 | 2966.99 | Up   |
| Hpca      | 9.57338 | -1.7518 | 0.84417 | -2.0751 | 0.03797  | 0.34837  | 8.87048 | 23.735  | 11.6897 | 2.04345 | 4.9525  | 6.1492  | Down |
| Fndc5     | 987.653 | -3.0527 | 0.75816 | -4.0265 | 5.66E-05 | 0.00347  | 1207.37 | 3286.31 | 794.897 | 88.8901 | 261.492 | 286.962 | Down |
| Marcks1   | 881.934 | 0.43784 | 0.13865 | 3.15783 | 0.00159  | 0.04285  | 823.969 | 734.796 | 688.716 | 972.683 | 1087.57 | 983.871 | Up   |
| Lck       | 985.676 | 0.72026 | 0.23838 | 3.02145 | 0.00252  | 0.05937  | 823.969 | 607.22  | 802.69  | 1341.53 | 1450.09 | 888.559 | Up   |
| Fam167b   | 43.8394 | -2.0705 | 0.58641 | -3.5309 | 0.00041  | 0.0164   | 129.115 | 36.5914 | 46.7587 | 17.3693 | 17.829  | 15.373  | Down |
| E330017L  | 31.9392 | -2.9348 | 0.71954 | -4.0787 | 4.53E-05 | 0.00291  | 32.5251 | 105.819 | 31.1724 | 5.10863 | 11.886  | 5.12433 | Down |
| Tinagl1   | 10282   | 0.43453 | 0.18362 | 2.36642 | 0.01796  | 0.2233   | 8900.05 | 7712.88 | 9622.54 | 12126.9 | 13813.5 | 9515.88 | Up   |
| Fabp3     | 2288.39 | -3.2313 | 0.48923 | -6.605  | 3.98E-11 | 1.62E-08 | 2759.7  | 7643.66 | 2005.75 | 319.8   | 675.522 | 325.907 | Down |
| Nkain1    | 119.012 | -0.8457 | 0.33404 | -2.5318 | 0.01135  | 0.16434  | 175.438 | 186.913 | 96.4397 | 100.129 | 77.2591 | 77.8898 | Down |
| Laptn5    | 6799.33 | 0.71094 | 0.33536 | 2.11995 | 0.03401  | 0.32506  | 6812.53 | 5189.06 | 3469.88 | 7321.68 | 12288.2 | 5714.65 | Up   |
| Fgr       | 1035.28 | 0.93718 | 0.32663 | 2.86923 | 0.00411  | 0.08423  | 839.739 | 828.747 | 462.716 | 1195.42 | 1917.61 | 967.473 | Up   |
| Tent5b    | 1154.94 | 0.35268 | 0.14436 | 2.44303 | 0.01456  | 0.19345  | 1061.5  | 1015.66 | 966.345 | 1374.22 | 1389.67 | 1122.23 | Up   |
| Nr0b2     | 8.90106 | -5.5892 | 2.02606 | -2.7587 | 0.0058   | 0.10597  | 8.87048 | 43.5142 | 0       | 1.02173 | 0       | 0       | Down |
| Sfn       | 1166.53 | -0.781  | 0.23766 | -3.2861 | 0.00102  | 0.03174  | 1034.89 | 1782.1  | 1607.33 | 788.772 | 804.287 | 981.822 | Down |
| Cd52      | 1926.79 | 0.54059 | 0.17451 | 3.09771 | 0.00195  | 0.04978  | 1784.94 | 1476.51 | 1448.54 | 2309.1  | 2615.91 | 1925.72 | Up   |
| Sh3bgrl3  | 3778.85 | 0.31145 | 0.13544 | 2.29947 | 0.02148  | 0.24997  | 3722.64 | 3230.93 | 3164    | 4599.81 | 3878.8  | 4076.92 | Up   |
| Cep85     | 9608.01 | 2.35828 | 0.84852 | 2.77928 | 0.00545  | 0.10239  | 4794    | 3865.84 | 748.138 | 16037   | 25056.7 | 7146.39 | Up   |
| Trim6     | 170.344 | -4.1761 | 1.88933 | -2.2104 | 0.02708  | 0.28467  | 149.813 | 678.425 | 140.276 | 2.04345 | 51.506  | 0       | Down |
| Stmn1     | 4547.2  | 0.32306 | 0.15465 | 2.08894 | 0.03671  | 0.3402   | 4057.75 | 3685.85 | 4376.8  | 5656.27 | 4316.6  | 5189.92 | Up   |
| Selenon   | 4057.45 | 0.29967 | 0.11262 | 2.66094 | 0.00779  | 0.12787  | 3708.85 | 3320.92 | 3882.92 | 4447.57 | 4593.94 | 4390.53 | Up   |
| Runx3     | 236.104 | 0.7472  | 0.32017 | 2.3338  | 0.01961  | 0.236    | 214.863 | 158.233 | 155.862 | 273.822 | 415.02  | 198.824 | Up   |
| Grhl3     | 68.9203 | -0.884  | 0.4468  | -1.9786 | 0.04786  | 0.3921   | 56.1797 | 102.852 | 109.104 | 44.9559 | 29.715  | 70.7157 | Down |
| Il22ra1   | 48.8168 | -0.9653 | 0.39552 | -2.4406 | 0.01466  | 0.19369  | 62.0933 | 71.205  | 60.3966 | 20.4345 | 33.677  | 45.0941 | Down |
| Cnr2      | 580.78  | 0.60315 | 0.23144 | 2.60609 | 0.00916  | 0.14264  | 531.243 | 375.804 | 476.354 | 712.143 | 843.907 | 545.229 | Up   |
| Ephb2     | 209.45  |         |         |         |          |          |         |         |         |         |         |         |      |

|          |         |         |         |         |          |          |         |         |         |         |         |         |      |
|----------|---------|---------|---------|---------|----------|----------|---------|---------|---------|---------|---------|---------|------|
| Crocc    | 718.955 | -0.5411 | 0.16531 | -3.273  | 0.00106  | 0.0325   | 811.156 | 761.498 | 983.88  | 563.992 | 553.69  | 639.516 | Down |
| Fam131c  | 97.5255 | -0.8529 | 0.38716 | -2.203  | 0.0276   | 0.28707  | 117.287 | 138.454 | 120.793 | 78.6729 | 35.658  | 94.2877 | Down |
| Clnka    | 39.8616 | 2.29407 | 1.03477 | 2.21698 | 0.02662  | 0.28184  | 5.91365 | 34.6135 | 0       | 53.1297 | 89.1451 | 56.3676 | Up   |
| Hspb7    | 2018.17 | -2.8101 | 0.73171 | -3.8405 | 0.00012  | 0.00633  | 2375.32 | 6368.89 | 1853.79 | 373.951 | 872.631 | 264.415 | Down |
| Tmem82   | 111.963 | -0.6784 | 0.29752 | -2.28   | 0.02261  | 0.25693  | 145.87  | 113.73  | 153.914 | 81.738  | 110.936 | 65.5914 | Down |
| Slc25a34 | 142.029 | -1.3052 | 0.38257 | -3.4116 | 0.00065  | 0.02309  | 207.963 | 282.842 | 115.922 | 62.3252 | 98.0596 | 85.0639 | Down |
| Gm29367  | 32.5685 | -1.2146 | 0.49944 | -2.4318 | 0.01502  | 0.19718  | 31.5395 | 50.4369 | 54.5518 | 14.3042 | 14.8575 | 29.7211 | Down |
| Lrrc38   | 2.46355 | -4.7255 | 1.97301 | -2.3951 | 0.01662  | 0.21222  | 6.89926 | 5.93375 | 1.94828 | 0       | 0       | 0       | Down |
| Tnfrsf1b | 2583.73 | 0.58156 | 0.27913 | 2.08351 | 0.0372   | 0.34382  | 2262.96 | 2124.28 | 1822.61 | 2866.96 | 4380.99 | 2044.61 | Up   |
| Zfp986   | 2.85562 | 3.93452 | 1.7035  | 2.30967 | 0.02091  | 0.24604  | 0       | 0.98896 | 0       | 4.0869  | 6.93351 | 5.12433 | Up   |
| Zfp987   | 5.03944 | 3.84331 | 1.43616 | 2.6761  | 0.00745  | 0.12383  | 0       | 1.97792 | 0       | 8.1738  | 11.886  | 8.19893 | Up   |
| Zfp981   | 35.6024 | 2.05742 | 0.62788 | 3.27675 | 0.00105  | 0.03233  | 13.7985 | 22.746  | 4.87069 | 54.1514 | 83.2021 | 34.8454 | Up   |
| Zfp979   | 259.026 | -0.5438 | 0.20871 | -2.6053 | 0.00918  | 0.14264  | 285.827 | 324.378 | 311.724 | 210.475 | 250.597 | 171.153 | Down |
| Mfn2     | 4172.69 | -0.6182 | 0.19008 | -3.2526 | 0.00114  | 0.0342   | 4454.95 | 6327.35 | 4377.78 | 3182.67 | 3604.43 | 3088.95 | Down |
| Plod1    | 3949.11 | 0.51943 | 0.19234 | 2.70065 | 0.00692  | 0.11842  | 2893.75 | 4052.75 | 2790.91 | 4904.28 | 4922.79 | 4130.21 | Up   |
| Nppa     | 1041.22 | -9.785  | 1.93112 | -5.067  | 4.04E-07 | 6.19E-05 | 300.611 | 5873.42 | 66.2414 | 0       | 2.9715  | 4.09946 | Down |
| Fbxo44   | 454.582 | -0.511  | 0.21964 | -2.3266 | 0.01998  | 0.23859  | 668.243 | 411.407 | 523.112 | 361.691 | 368.466 | 394.573 | Down |
| Fbxo2    | 165.193 | -0.6493 | 0.28628 | -2.2681 | 0.02333  | 0.2617   | 254.287 | 146.366 | 204.569 | 112.39  | 120.841 | 152.705 | Down |
| Gm13206  | 8.48302 | 2.68237 | 1.0779  | 2.48851 | 0.01283  | 0.17723  | 0.98561 | 1.97792 | 3.89655 | 8.1738  | 29.715  | 6.1492  | Up   |
| Masp2    | 123.421 | -1.7573 | 0.26529 | -6.6239 | 3.50E-11 | 1.45E-08 | 170.51  | 168.123 | 232.819 | 62.3252 | 54.4775 | 52.2682 | Down |
| Gm572    | 5.61675 | -2.4887 | 1.24723 | -1.9953 | 0.04601  | 0.38389  | 5.91365 | 17.8012 | 4.87069 | 3.06518 | 0       | 2.04973 | Down |
| Cort     | 32.584  | -1.9823 | 0.55347 | -3.5815 | 0.00034  | 0.01424  | 59.1365 | 28.6798 | 68.1897 | 8.1738  | 12.8765 | 18.4476 | Down |
| Pik3cd   | 1799.03 | 0.50954 | 0.17965 | 2.83637 | 0.00456  | 0.09101  | 1531.64 | 1486.4  | 1435.88 | 1989.3  | 2588.18 | 1762.77 | Up   |
| Tmem201  | 1314.54 | -0.3173 | 0.13713 | -2.3136 | 0.02069  | 0.2444   | 1304.95 | 1557.61 | 1512.84 | 1174.98 | 1088.56 | 1248.29 | Down |
| Slc25a33 | 737.059 | 0.41163 | 0.18397 | 2.23746 | 0.02526  | 0.27483  | 612.063 | 706.116 | 579.612 | 816.359 | 716.132 | 992.07  | Up   |
| Eno1     | 6394.4  | 0.50051 | 0.13699 | 3.65355 | 0.00026  | 0.01147  | 5529.26 | 5811.12 | 4548.25 | 7577.12 | 7262.35 | 7638.33 | Up   |
| Rnf207   | 136.176 | -3.2099 | 0.54601 | -5.8789 | 4.13E-09 | 1.21E-06 | 173.467 | 449.976 | 113.974 | 18.3911 | 36.6485 | 24.5968 | Down |
| Ajap1    | 24.2081 | 1.23989 | 0.51116 | 2.42562 | 0.01528  | 0.19929  | 7.88487 | 16.8123 | 18.5086 | 30.6518 | 39.62   | 31.7708 | Up   |
| Wrap73   | 916.596 | 0.24745 | 0.12111 | 2.04313 | 0.04104  | 0.36471  | 810.17  | 816.879 | 887.44  | 947.139 | 989.51  | 1048.44 | Up   |
| Gm13110  | 166.11  | -0.9837 | 0.39948 | -2.4624 | 0.0138   | 0.18629  | 189.237 | 203.725 | 268.862 | 104.216 | 58.4396 | 172.177 | Down |
| Mxra8    | 20060.1 | -0.4332 | 0.13905 | -3.1152 | 0.00184  | 0.04766  | 21691.3 | 25040.4 | 22415.9 | 17073   | 15130.9 | 19009.2 | Down |
| Acap3    | 1792.43 | 0.37639 | 0.16408 | 2.29398 | 0.02179  | 0.2515   | 1606.54 | 1487.39 | 1585.9  | 2270.27 | 2151.37 | 1653.11 | Up   |
| Tnfrsf4  | 200.517 | 0.59815 | 0.22651 | 2.64073 | 0.00827  | 0.13297  | 167.553 | 150.322 | 160.733 | 289.148 | 242.673 | 192.675 | Up   |
| Gm37090  | 492.71  | -0.677  | 0.19149 | -3.5352 | 0.00041  | 0.01622  | 524.344 | 622.055 | 672.156 | 411.755 | 314.979 | 410.971 | Down |
| 9430015G | 1073.82 | 0.35915 | 0.16834 | 2.13349 | 0.03288  | 0.31902  | 894.933 | 895.996 | 1031.61 | 1358.89 | 1251.99 | 1009.49 | Up   |
| Isg15    | 568.442 | 0.74078 | 0.16779 | 4.41493 | 1.01E-05 | 0.00084  | 489.848 | 385.694 | 401.345 | 777.533 | 699.294 | 656.939 | Up   |
| Perm1    | 500.161 | -1.5841 | 0.43775 | -3.6187 | 0.0003   | 0.01276  | 479.991 | 1330.15 | 440.311 | 231.932 | 324.884 | 193.7   | Down |
| Samd11   | 39.0312 | 3.15612 | 0.91448 | 3.45127 | 0.00056  | 0.02067  | 7.88487 | 10.8785 | 4.87069 | 76.6294 | 127.775 | 6.1492  | Up   |
| Dbf4     | 501.918 | 0.47652 | 0.1367  | 3.48585 | 0.00049  | 0.01872  | 444.51  | 424.263 | 390.63  | 572.166 | 611.139 | 568.801 | Up   |
| Abcb4    | 60.6765 | -1.3818 | 0.55025 | -2.5113 | 0.01203  | 0.17     | 55.1941 | 160.211 | 47.7328 | 28.6083 | 42.5915 | 29.7211 | Down |
| Tmem243  | 4987.06 | 0.3347  | 0.15476 | 2.1627  | 0.03056  | 0.30543  | 5004.92 | 4166.48 | 4062.16 | 5692.03 | 6116.34 | 4880.41 | Up   |
| Cacna2d1 | 2495.19 | -0.34   | 0.12204 | -2.7858 | 0.00534  | 0.10063  | 2765.62 | 3016.32 | 2581.47 | 2240.64 | 2064.2  | 2302.87 | Down |
| Gm28710  | 5.9148  | -2.9483 | 1.19089 | -2.4757 | 0.0133   | 0.18144  | 12.8129 | 4.94479 | 13.6379 | 2.04345 | 0       | 2.04973 | Down |
| Ptpn12   | 7441.46 | 0.29058 | 0.12807 | 2.26889 | 0.02327  | 0.26151  | 6773.1  | 6246.26 | 7064.45 | 8269.85 | 8928.37 | 7366.74 | Up   |
| Gsap     | 5272.82 | 0.52502 | 0.15531 | 3.38056 | 0.00072  | 0.02491  | 4939.87 | 3894.52 | 4137.17 | 6543.13 | 6643.29 | 5478.93 | Up   |
| Al506816 | 1547.02 | 0.40141 | 0.15982 | 2.51165 | 0.01202  | 0.16994  | 1287.2  | 1392.45 | 1319.96 | 1911.65 | 1918.6  | 1452.23 | Up   |
| Kcnh2    | 892.894 | -1.2543 | 0.2269  | -5.5277 | 3.24E-08 | 7.30E-06 | 1105.85 | 1616.95 | 1052.07 | 479.189 | 486.336 | 616.969 | Down |
| Asb10    | 68.1598 | -4.43   | 0.85118 | -5.2046 | 1.94E-07 | 3.44E-05 | 64.0646 | 290.754 | 36.0431 | 2.04345 | 9.90501 | 6.1492  | Down |
| Smardc3  | 680.128 | -0.3856 | 0.12612 | -3.0571 | 0.00223  | 0.05441  | 790.458 | 804.023 | 716.966 | 574.21  | 587.367 | 607.745 | Down |
| Gm7361   | 18.7929 | -3.1957 | 1.15911 | -2.757  | 0.00583  | 0.10621  | 11.8273 | 80.1056 | 9.74139 | 6.13035 | 4.9525  | 0       | Down |
| Cnpy1    | 21.3157 | -1.3845 | 0.57077 | -2.4256 | 0.01528  | 0.19929  | 19.7122 | 45.4921 | 27.2759 | 14.3042 | 11.886  | 9.22379 | Down |
| Hadha    | 7262.08 | -0.3509 | 0.15866 | -2.2118 | 0.02698  | 0.28409  | 7595.1  | 9666.08 | 7161.87 | 5966.88 | 6595.75 | 6586.81 | Down |
| Hadhb    | 6844.31 | -0.5402 | 0.24092 | -2.2422 | 0.02495  | 0.27329  | 6843.08 | 11247.4 | 6242.28 | 5349.75 | 5834.56 | 5834.56 | Down |
| Gm9899   | 249.271 | -1.0993 | 0.26504 | -4.1477 | 3.36E-05 | 0.00231  | 279.913 | 410.418 | 329.259 | 163.476 | 118.86  | 193.7   | Down |
| Kcnk3    | 1751.6  | -0.7062 | 0.26134 | -2.7021 | 0.00689  | 0.11825  | 1627.24 | 3079.62 | 1808.98 | 1351.74 | 1420.38 | 1221.64 | Down |
| Trim54   | 165.116 | -4.3034 | 1.68418 | -2.5552 | 0.01061  | 0.15699  | 149.813 | 663.591 | 129.56  | 6.13035 | 41.601  | 0       | Down |
| Slc5a1   | 459.84  | 0.87457 | 0.29214 | 2.99364 | 0.00276  | 0.0632   | 347.92  | 359.981 | 265.94  | 458.755 | 848.859 | 477.587 | Up   |
| Spon2    | 856.517 | -1.187  | 0.53376 | -2.2239 | 0.02615  | 0.27986  | 322.294 | 1411.24 | 1837.23 | 400.516 | 399.172 | 768.649 | Down |
| Gm20465  | 6.23302 | 6.10776 | 1.49798 | 4.07732 | 4.56E-05 | 0.00292  | 0       | 0       | 0       | 13.2824 | 13.867  | 10.2487 | Up   |
| Gm9903   | 21.5119 | -1.3373 | 0.61266 | -2.1828 | 0.02905  | 0.29524  | 19.7122 | 42.5252 | 30.1983 | 17.3693 | 5.94301 | 13.3233 | Down |
| Tacc3    | 347.446 | 0.50426 | 0.21797 | 2.31339 | 0.0207   | 0.24442  | 322.294 | 263.063 | 276.655 | 495.537 | 399.172 | 327.957 | Up   |
| Nat8l    | 209.451 | -1.1166 | 0.33101 | -3.3732 | 0.00074  | 0.02531  | 261.186 | 371.848 | 226.974 | 102.173 | 106.974 | 187.55  | Down |
| Dok7     | 197.76  | -1.2789 | 0.37362 | -3.423  | 0.00062  | 0.02229  | 175.438 | 426.241 | 238.664 | 107.281 | 143.623 | 95.3125 | Down |
| Trmt44   | 413.137 | 0.3481  | 0.15193 | 2.29118 | 0.02195  | 0.25271  | 355.805 | 349.102 | 385.759 | 451.603 | 507.136 | 429.419 | Up   |
| Htra3    | 1187.46 | -0.7611 | 0.24744 | -3.076  | 0.0021   | 0.05218  | 1231.03 | 1965.06 | 1284.89 | 960.422 | 988.52  | 694.859 | Down |
| Ablim2   | 493.561 | -0.6154 | 0.18944 | -3.2486 | 0.00116  | 0.03459  | 520.401 | 727.873 | 543.569 | 390.299 | 404.124 | 375.101 | Down |
| Ccdc96   | 695.06  | -0.6881 | 0.26277 | -2.6186 | 0.00883  | 0.13958  | 739.207 | 1015.66 | 818.276 | 450.581 | 418.982 | 727.655 | Down |
| Ppp2r2c  | 821.498 | -1.1637 | 0.32509 | -3.5795 | 0.00034  | 0.01432  | 890.005 | 1138.29 | 1379.38 | 524.145 | 296.16  | 701.008 | Down |
| Wfs1     | 1569.49 | -0.336  | 0.11483 | -2.9262 | 0.00343  | 0.07439  | 1779.02 | 1860.23 | 1615.12 | 1406.92 | 1394.63 | 1361.02 | Down |
| Cyt1l    | 1523.68 | -0.321  | 0.1555  | -2.064  | 0.03902  | 0.3548   | 1571.06 | 1925.5  | 1581.03 | 1278.18 | 1514.48 | 1271.86 | Down |
| Otop1    | 33.9354 | -8.5098 | 2.52099 | -3.3756 | 0.00074  | 0.02521  | 15.7697 | 183.946 | 3.89655 | 0       | 0       | 0       | Down |
| Zfp518b  | 447.408 | -0.3187 | 0.14513 | -2.1956 | 0.02812  | 0.28971  | 477.035 | 498.435 | 514.345 | 436.277 | 385.305 | 373.051 | Down |
| Gm40293  | 4.93491 | -5.7279 | 2.39119 | -2.3954 | 0.0166   | 0.21213  | 0       | 25.7129 | 3.89655 | 0       | 0       | 0       | Down |
| C1qtnf7  | 2372.76 | -0.3461 | 0.10012 | -3.4564 | 0.00055  | 0.02042  | 2795.19 | 2539.64 | 2633.1  | 2110.88 | 2072.13 | 2085.6  | Down |
| Bst1     | 1763.34 | 1.27349 | 0.43063 | 2.9573  | 0.0031   | 0.06959  | 1670.61 | 856.438 | 568.897 | 2441.92 | 3608.39 | 1433.79 | Up   |
| Ncapg    | 99.459  | 1.532   | 0.47777 | 3.20659 | 0.00134  | 0.03837  | 48.2948 | 55.3817 | 49.6811 | 184.932 | 201.072 | 57.3925 | Up   |
| Ppargc1a | 446.629 | -1.1765 | 0.34079 | -3.4524 | 0.00056  | 0.02063  | 390.301 | 876.217 | 591.302 | 213.541 | 246.635 | 361.778 | Down |
| Slc34a2  | 97785.1 | 0.55312 | 0.20061 | 2.75713 | 0.00583  | 0.10621  | 999     |         |         |         |         |         |      |

|           |         |         |         |         |          |          |         |         |         |         |         |         |      |
|-----------|---------|---------|---------|---------|----------|----------|---------|---------|---------|---------|---------|---------|------|
| Tlr1      | 335.957 | 0.57342 | 0.1916  | 2.99288 | 0.00276  | 0.06326  | 309.481 | 263.063 | 237.69  | 430.146 | 426.906 | 348.454 | Up   |
| Gm43552   | 128.209 | -0.4738 | 0.2341  | -2.0238 | 0.04299  | 0.37324  | 169.525 | 132.52  | 145.147 | 122.607 | 100.041 | 99.412  | Down |
| Rhoh      | 423.718 | 0.53165 | 0.23256 | 2.28608 | 0.02225  | 0.25476  | 390.301 | 292.732 | 356.535 | 593.622 | 529.918 | 379.2   | Up   |
| Yipf7     | 111.438 | -4.2323 | 1.49469 | -2.8315 | 0.00463  | 0.09178  | 119.259 | 410.418 | 105.207 | 1.02173 | 31.696  | 1.02487 | Down |
| Corin     | 457.971 | -2.5256 | 0.53055 | -4.7603 | 1.93E-06 | 0.00023  | 483.934 | 1474.54 | 382.836 | 122.607 | 206.024 | 77.8898 | Down |
| Tec       | 768.403 | 0.33223 | 0.14541 | 2.28487 | 0.02232  | 0.25503  | 763.847 | 655.679 | 621.5   | 811.25  | 901.356 | 856.788 | Up   |
| Sgcb      | 2684.11 | -0.4278 | 0.1487  | -2.8772 | 0.00401  | 0.08279  | 2892.76 | 3526.62 | 2818.18 | 2215.1  | 2153.35 | 2498.62 | Down |
| Stap1     | 496.291 | 0.70607 | 0.30837 | 2.2897  | 0.02204  | 0.25315  | 420.855 | 373.826 | 337.052 | 566.036 | 888.479 | 391.499 | Up   |
| Gnrhr     | 2.02993 | 4.48852 | 2.00728 | 2.23612 | 0.02534  | NA       | 0       | 0       | 0       | 5.10863 | 2.9715  | 4.09946 | Up   |
| Tmprss11i | 8.0797  | -1.9244 | 0.87276 | -2.2049 | 0.02746  | 0.28689  | 7.88487 | 19.7792 | 10.7155 | 4.0869  | 3.962   | 2.04973 | Down |
| Ugt2b34   | 6.93407 | -2.8543 | 1.42257 | -2.0064 | 0.04481  | 0.38008  | 1.97122 | 32.6356 | 1.94828 | 2.04345 | 1.981   | 1.02487 | Down |
| Sult1d1   | 3330.61 | -1.7182 | 0.8416  | -2.0416 | 0.0412   | 0.36565  | 3129.31 | 8265.71 | 3930.65 | 1580.61 | 362.523 | 2714.87 | Down |
| Jchain    | 10679.2 | 3.25584 | 0.73137 | 4.45173 | 8.52E-06 | 0.00075  | 2403.9  | 2579.2  | 1089.09 | 19905.3 | 32128.9 | 5968.82 | Up   |
| Cxcl5     | 155.723 | -2.3083 | 0.75588 | -3.0538 | 0.00226  | 0.05483  | 27.597  | 372.837 | 376.992 | 36.7821 | 82.2116 | 37.92   | Down |
| Cxcl3     | 61.7787 | 3.42846 | 0.83848 | 4.08891 | 4.33E-05 | 0.00281  | 5.91365 | 17.8012 | 7.79311 | 263.605 | 37.639  | 37.92   | Up   |
| Cxcl2     | 78.2997 | 1.50975 | 0.68557 | 2.20218 | 0.02765  | 0.28707  | 76.8775 | 27.6908 | 17.5345 | 220.693 | 61.4111 | 65.5914 | Up   |
| Areg      | 605.524 | -1.1543 | 0.51677 | -2.2336 | 0.02551  | 0.27596  | 1126.55 | 575.574 | 804.638 | 452.624 | 105.984 | 567.776 | Down |
| Cxcl9     | 635.637 | 4.77882 | 1.15698 | 4.13044 | 3.62E-05 | 0.00244  | 65.0502 | 54.3927 | 14.6121 | 1108.57 | 2457.43 | 113.76  | Up   |
| Art3      | 2422.49 | -1.1739 | 0.36811 | -3.1889 | 0.00143  | 0.04     | 2327.02 | 5571.79 | 2172.33 | 1328.24 | 1847.28 | 1288.26 | Down |
| Cxcl13    | 738.401 | 1.96334 | 0.76923 | 2.55234 | 0.0107   | 0.15773  | 208.949 | 504.369 | 190.931 | 1570.39 | 1615.51 | 340.255 | Up   |
| Gm7993    | 474.362 | -5.0049 | 0.37969 | -13.182 | 1.12E-39 | 2.42E-36 | 487.876 | 1214.44 | 1057.91 | 23.4997 | 31.696  | 30.746  | Down |
| Prdm8     | 51.7921 | -0.8436 | 0.35394 | -2.3836 | 0.01714  | 0.21666  | 56.1797 | 79.1166 | 64.2931 | 41.8907 | 41.601  | 27.6714 | Down |
| Prkg2     | 1337.11 | -0.3119 | 0.1346  | -2.3174 | 0.02048  | 0.2424   | 1450.82 | 1433    | 1559.6  | 1220.96 | 1297.56 | 1060.74 | Down |
| Cds1      | 4478.08 | -0.5167 | 0.22487 | -2.2979 | 0.02157  | 0.25004  | 4786.12 | 5929.79 | 5098.64 | 3161.22 | 3006.17 | 4886.56 | Down |
| Mapk10    | 565.747 | -3.699  | 0.92946 | -3.9797 | 6.90E-05 | 0.00401  | 585.452 | 2114.39 | 452     | 27.5866 | 152.537 | 62.5168 | Down |
| Zfp951    | 300.883 | 0.7037  | 0.17508 | 4.01925 | 5.84E-05 | 0.00357  | 222.748 | 210.648 | 253.276 | 382.125 | 335.78  | 400.723 | Up   |
| Gbp8      | 3130.02 | 0.48664 | 0.17087 | 2.84807 | 0.0044   | 0.08844  | 2327.02 | 2938.19 | 2556.14 | 3568.89 | 4236.37 | 3153.51 | Up   |
| Gbp11     | 44.501  | 1.08144 | 0.53785 | 2.01068 | 0.04436  | 0.37818  | 33.5107 | 39.5583 | 12.6638 | 46.9994 | 88.1546 | 46.119  | Up   |
| Btb8      | 74.8366 | -0.6463 | 0.28757 | -2.2476 | 0.0246   | 0.27077  | 77.8631 | 85.0504 | 111.052 | 60.2818 | 59.4301 | 55.3428 | Down |
| Crif2     | 1086.78 | 0.5351  | 0.13068 | 4.09486 | 4.22E-05 | 0.00276  | 846.638 | 925.665 | 890.363 | 1252.64 | 1412.45 | 1192.94 | Up   |
| Tpst2     | 4328.13 | 0.29097 | 0.11783 | 2.46948 | 0.01353  | 0.18354  | 3694.06 | 3798.59 | 4186.85 | 4623.31 | 5126.83 | 4539.13 | Up   |
| Myo18b    | 257.747 | -3.0807 | 1.09719 | -2.8079 | 0.00499  | 0.09607  | 264.143 | 820.835 | 298.086 | 18.3911 | 132.727 | 12.2984 | Down |
| Selplg    | 2595.21 | 0.66269 | 0.24656 | 2.6877  | 0.00719  | 0.12138  | 2363.49 | 1964.07 | 1700.85 | 3067.22 | 4150.2  | 2325.42 | Up   |
| Acacb     | 1398.12 | -0.6831 | 0.24692 | -2.7666 | 0.00566  | 0.1051   | 1692.29 | 2235.05 | 1242.03 | 923.64  | 1240.11 | 1055.61 | Down |
| Myo1h     | 633.001 | -0.6944 | 0.34853 | -1.9924 | 0.04632  | 0.38491  | 616.005 | 927.643 | 803.664 | 392.343 | 305.074 | 753.276 | Down |
| Pla2g1b   | 472.866 | 0.46389 | 0.21041 | 2.20471 | 0.02747  | 0.28689  | 441.553 | 311.522 | 439.336 | 494.515 | 521.003 | 629.268 | Up   |
| C330018A  | 31.6204 | -1.0467 | 0.47423 | -2.2072 | 0.0273   | 0.2859   | 30.5539 | 54.3927 | 42.8621 | 17.3693 | 15.848  | 28.6962 | Down |
| Hspb8     | 5572.33 | -0.4232 | 0.17968 | -2.3554 | 0.0185   | 0.22687  | 5786.51 | 7922.54 | 5442.51 | 5002.37 | 4671.2  | 4608.82 | Down |
| Gm7478    | 9.51354 | -3.7271 | 1.16746 | -3.1925 | 0.00141  | 0.03981  | 22.669  | 16.8123 | 13.6379 | 0       | 3.962   | 0       | Down |
| Gm15728   | 253.004 | -0.8519 | 0.35857 | -2.3757 | 0.01751  | 0.21913  | 342.992 | 359.981 | 273.733 | 186.976 | 96.0786 | 258.266 | Down |
| Nos1      | 18.4499 | -3.023  | 0.8794  | -3.4376 | 0.00059  | 0.02146  | 12.8129 | 68.2381 | 17.5345 | 4.0869  | 4.9525  | 3.0746  | Down |
| Tesc      | 125.962 | -0.8131 | 0.30206 | -2.692  | 0.0071   | 0.12048  | 109.403 | 204.714 | 167.552 | 86.8467 | 97.0691 | 90.1882 | Down |
| 1700021F  | 79.614  | -0.5927 | 0.27585 | -2.1488 | 0.03165  | 0.31154  | 93.6328 | 111.752 | 81.8276 | 68.4556 | 57.449  | 64.5665 | Down |
| Tbx5      | 1998.33 | -0.5383 | 0.25004 | -2.1527 | 0.03135  | 0.30994  | 2034.3  | 2918.42 | 2147.98 | 1609.22 | 2082.03 | 1198.07 | Down |
| Sds       | 61.861  | -1.9185 | 0.57247 | -3.3513 | 0.0008   | 0.02668  | 56.1797 | 175.046 | 62.3449 | 26.5649 | 35.658  | 15.373  | Down |
| Dtx1      | 663.841 | -0.631  | 0.19168 | -2.2921 | 0.00099  | 0.03131  | 868.321 | 846.548 | 705.276 | 533.341 | 425.915 | 603.646 | Down |
| Arpc3     | 9033.49 | 0.23445 | 0.10095 | 2.32246 | 0.02021  | 0.24068  | 7877.97 | 8136.16 | 8889.01 | 9784.04 | 9591.02 | 9922.75 | Up   |
| Atp2a2    | 37414.6 | -1.5263 | 0.37767 | -4.0414 | 5.31E-05 | 0.0033   | 38952.2 | 91560.7 | 36124   | 15922.6 | 26142.3 | 15786   | Down |
| Rhof      | 579.961 | 0.51696 | 0.22917 | 2.25578 | 0.02408  | 0.26726  | 533.214 | 397.561 | 500.707 | 765.272 | 771.6   | 511.408 | Up   |
| Kntc1     | 98.1736 | 1.19551 | 0.4166  | 2.86969 | 0.00411  | 0.08418  | 62.0933 | 68.2381 | 48.7069 | 206.389 | 127.775 | 75.8401 | Up   |
| Hcar1     | 53.1844 | -1.0385 | 0.45893 | -2.2628 | 0.02365  | 0.26379  | 48.2948 | 111.752 | 54.5518 | 40.869  | 26.7435 | 36.8952 | Down |
| Gm16001   | 32.9521 | -1.0347 | 0.42465 | -2.4366 | 0.01483  | 0.19554  | 49.2804 | 51.4258 | 32.1466 | 25.5431 | 18.8195 | 20.4973 | Down |
| 2810006K  | 534.527 | 0.29954 | 0.14745 | 2.03144 | 0.04221  | 0.37137  | 492.804 | 522.17  | 422.776 | 600.775 | 582.414 | 586.223 | Up   |
| Scarb1    | 4724.03 | 0.44949 | 0.17595 | 2.55457 | 0.01063  | 0.15715  | 4575.2  | 3678.92 | 3728.03 | 5621.53 | 6206.48 | 4534.01 | Up   |
| Adgrd1    | 535.973 | -1.0658 | 0.33822 | -3.1512 | 0.00163  | 0.04351  | 619.948 | 958.3   | 598.121 | 328.996 | 495.25  | 215.222 | Down |
| Nipsnap2  | 6132.37 | -0.6032 | 0.25345 | -2.3798 | 0.01732  | 0.21748  | 6716.92 | 9462.35 | 6008.49 | 4299.42 | 3960.02 | 6346.99 | Down |
| Phkg1     | 287.126 | -2.022  | 0.44418 | -4.5522 | 5.31E-06 | 0.00053  | 308.496 | 806.001 | 267.888 | 87.8684 | 106.974 | 145.531 | Down |
| Galnt17   | 130.91  | -0.5617 | 0.25144 | -2.2341 | 0.02548  | 0.27576  | 181.352 | 160.211 | 126.638 | 107.281 | 92.1166 | 117.86  | Down |
| Eln       | 6847.89 | -0.7167 | 0.35609 | -2.0126 | 0.04415  | 0.37732  | 4178    | 11845.7 | 9520.26 | 5061.63 | 6339.21 | 4142.51 | Down |
| Mxipl     | 341.458 | -0.925  | 0.34492 | -2.6816 | 0.00733  | 0.12303  | 324.265 | 696.226 | 321.466 | 204.345 | 228.806 | 273.639 | Down |
| Srrm3     | 8.04281 | -3.4401 | 1.21554 | -2.8301 | 0.00465  | 0.09178  | 3.94243 | 18.7902 | 21.431  | 2.04345 | 0       | 2.04973 | Down |
| Vgf       | 6.74747 | -3.1678 | 1.06068 | -2.9866 | 0.00282  | 0.06413  | 13.7985 | 14.8344 | 7.79311 | 2.04345 | 0.9905  | 1.02487 | Down |
| Irs3      | 180.332 | -0.5229 | 0.23533 | -2.2218 | 0.02629  | 0.28068  | 182.338 | 237.35  | 218.207 | 139.976 | 125.794 | 178.327 | Down |
| Pilra     | 537.45  | 1.11863 | 0.36613 | 3.05529 | 0.00225  | 0.05468  | 457.322 | 352.069 | 207.492 | 715.208 | 1022.2  | 470.413 | Up   |
| Azgp1     | 790.297 | 0.83517 | 0.27801 | 3.0041  | 0.00266  | 0.06165  | 540.114 | 642.823 | 520.19  | 945.096 | 686.417 | 1407.14 | Up   |
| Gm454     | 3.60689 | -5.2757 | 1.69305 | -3.1161 | 0.00183  | 0.04756  | 7.88487 | 7.91166 | 5.84483 | 0       | 0       | 0       | Down |
| Pvrig     | 9.06701 | 2.56346 | 0.87844 | 2.91818 | 0.00352  | 0.07506  | 4.92804 | 1.97792 | 0.97414 | 12.2607 | 16.8385 | 17.4227 | Up   |
| 6330403L  | 584.352 | -0.3694 | 0.13537 | -2.7289 | 0.00636  | 0.11277  | 603.193 | 687.326 | 685.794 | 515.971 | 524.965 | 488.861 | Down |
| Elf1      | 896.567 | 0.39556 | 0.16602 | 2.38258 | 0.01719  | 0.21691  | 842.695 | 713.039 | 767.621 | 1035.01 | 1151.95 | 869.086 | Up   |
| Amz1      | 736.614 | 0.91113 | 0.24906 | 3.65832 | 0.00025  | 0.0113   | 636.703 | 491.512 | 406.216 | 961.444 | 1177.71 | 746.102 | Up   |
| Card11    | 880.065 | 0.84838 | 0.38579 | 2.19908 | 0.02787  | 0.2884   | 938.3   | 483.601 | 463.69  | 1148.42 | 1598.67 | 647.715 | Up   |
| Fscn1     | 758.422 | 1.09578 | 0.2314  | 4.73533 | 2.19E-06 | 0.00025  | 493.79  | 461.843 | 494.862 | 1240.37 | 1136.1  | 723.555 | Up   |
| 0610040B  | 61.4789 | -0.6138 | 0.29671 | -2.0685 | 0.03859  | 0.35239  | 81.8055 | 66.2602 | 75.0087 | 42.9125 | 47.544  | 55.3428 | Down |
| Nptx2     | 37.5765 | -2.1487 | 0.47149 | -4.5572 | 5.18E-06 | 0.00052  | 54.2085 | 79.1166 | 50.6552 | 8.1738  | 14.8575 | 18.4476 | Down |
| Arpc1b    | 9385.6  | 0.39789 | 0.18212 | 2.18481 | 0.0289   | 0.29455  | 8801.49 | 7833.54 | 7663.55 | 10313.3 | 12991.4 | 8710.33 | Up   |
| Flt3      | 307.158 | 0.90091 | 0.34602 | 2.6036  | 0.00922  | 0.14322  | 273.014 | 171.09  | 198.724 | 348.408 | 589.348 | 262.366 | Up   |
| Mtus2     | 842.772 | -1.0375 | 0.33617 | -3.0863 | 0.00203  | 0.0513   | 952.098 | 1763.31 | 684.819 | 491.45  | 570.528 | 594.422 | Down |
| Gm15407   | 2.46466 | -4.7261 | 1.98464 | -2      |          |          |         |         |         |         |         |         |      |

|           |         |         |         |         |          |          |         |         |         |         |         |         |      |
|-----------|---------|---------|---------|---------|----------|----------|---------|---------|---------|---------|---------|---------|------|
| Kl        | 98.1777 | -0.6889 | 0.32152 | -2.1427 | 0.03214  | 0.31414  | 79.8343 | 147.355 | 136.379 | 74.586  | 81.2211 | 69.6909 | Down |
| Gm20559   | 2847.23 | 0.34358 | 0.1491  | 2.30437 | 0.0212   | 0.24829  | 2798.14 | 2131.2  | 2599.98 | 3018.18 | 3181.49 | 3354.39 | Up   |
| Peg10     | 170.729 | -0.5742 | 0.21766 | -2.6383 | 0.00833  | 0.13379  | 183.323 | 187.902 | 241.586 | 131.803 | 148.575 | 131.183 | Down |
| Pdk4      | 2032.65 | -1.0572 | 0.4374  | -2.4171 | 0.01565  | 0.20256  | 1679.48 | 4298.01 | 2260    | 947.139 | 2180.09 | 831.166 | Down |
| Dync1i1   | 2068.68 | -0.8225 | 0.35132 | -2.3412 | 0.01922  | 0.23297  | 2132.86 | 3226.97 | 2568.8  | 1463.11 | 795.372 | 2224.98 | Down |
| Tac1      | 3.78766 | -5.3461 | 2.41584 | -2.2129 | 0.0269   | 0.28339  | 5.91365 | 16.8123 | 0       | 0       | 0       | 0       | Down |
| C1galt1   | 4466.02 | 0.48542 | 0.20333 | 2.38737 | 0.01697  | 0.21493  | 3457.52 | 2932.26 | 4775.23 | 5227.15 | 5390.31 | 5013.64 | Up   |
| Col28a1   | 59.1653 | 0.83135 | 0.34242 | 2.42787 | 0.01519  | 0.19829  | 43.3668 | 40.5473 | 43.8362 | 84.8032 | 89.1451 | 53.293  | Up   |
| Nxph1     | 49.8137 | 1.68584 | 0.84224 | 2.00161 | 0.04533  | 0.38132  | 47.3092 | 13.8454 | 9.74139 | 49.0428 | 159.471 | 19.4725 | Up   |
| Thsd7a    | 270.798 | -0.7829 | 0.26524 | -2.9515 | 0.00316  | 0.07062  | 320.323 | 457.888 | 249.379 | 205.367 | 197.11  | 194.725 | Down |
| Ppp1r3a   | 744.681 | -0.8574 | 0.32813 | -2.6129 | 0.00898  | 0.14076  | 943.228 | 1318.28 | 617.604 | 466.928 | 714.151 | 407.897 | Down |
| Tfec      | 366.022 | 1.27356 | 0.41596 | 3.06174 | 0.0022   | 0.054    | 322.294 | 185.924 | 134.431 | 578.297 | 693.351 | 281.838 | Up   |
| Met       | 3631.47 | 0.52621 | 0.20282 | 2.5945  | 0.00947  | 0.14581  | 3004.14 | 2368.55 | 3556.58 | 3600.56 | 4450.32 | 4808.67 | Up   |
| Capza2    | 11687.5 | 0.24327 | 0.11067 | 2.1982  | 0.02793  | 0.28877  | 10565.7 | 10510.6 | 11037   | 12751.1 | 13634.2 | 11626.1 | Up   |
| St7       | 1234.21 | 0.32324 | 0.13098 | 2.46795 | 0.01359  | 0.18422  | 1046.72 | 1055.22 | 1187.47 | 1379.33 | 1266.85 | 1469.66 | Up   |
| Wnt2      | 837.185 | -0.3869 | 0.19509 | -1.9833 | 0.04733  | 0.38999  | 906.76  | 786.222 | 1153.38 | 657.991 | 800.325 | 718.431 | Down |
| Cttnbp2   | 296.286 | -0.8135 | 0.19895 | -4.0887 | 4.34E-05 | 0.00281  | 385.373 | 416.351 | 331.207 | 241.127 | 181.262 | 222.396 | Down |
| Ankrd7    | 6.04298 | 3.04819 | 1.34694 | 2.26305 | 0.02363  | 0.26374  | 0       | 0       | 3.89655 | 7.15208 | 11.886  | 13.3233 | Up   |
| Kcnd2     | 94.6837 | -2.9432 | 0.62527 | -4.7071 | 2.51E-06 | 0.00028  | 110.388 | 314.489 | 77.9311 | 16.3476 | 36.6485 | 12.2984 | Down |
| Ptpnz1    | 1039.24 | -0.7488 | 0.37543 | -1.9945 | 0.0461   | 0.38407  | 884.091 | 1706.94 | 1318.01 | 714.186 | 439.782 | 1172.45 | Down |
| Aass      | 683.969 | 0.56193 | 0.16042 | 3.50286 | 0.00046  | 0.01781  | 490.833 | 538.982 | 627.345 | 841.902 | 743.866 | 860.887 | Up   |
| Asb15     | 54.333  | -1.9073 | 0.66204 | -2.8809 | 0.00397  | 0.0823   | 50.266  | 172.079 | 35.069  | 24.5214 | 29.715  | 14.3481 | Down |
| Lmod2     | 603.804 | -3.6619 | 1.04967 | -3.4886 | 0.00049  | 0.01856  | 831.854 | 1937.37 | 588.38  | 24.5214 | 210.977 | 29.7211 | Down |
| Grm8      | 58.057  | -1.0956 | 0.5463  | -2.0056 | 0.0449   | 0.38025  | 68.9926 | 111.752 | 56.5    | 42.9125 | 13.867  | 54.3179 | Down |
| Gm42547   | 1097.14 | 0.27917 | 0.13759 | 2.02905 | 0.04245  | 0.37204  | 903.803 | 1052.25 | 1017.97 | 1246.5  | 1269.82 | 1092.51 | Up   |
| Lep       | 176.535 | -7.4385 | 0.84174 | -8.837  | 9.83E-19 | 1.12E-15 | 216.834 | 683.37  | 152.94  | 4.0869  | 1.981   | 0       | Down |
| Flnc      | 689.72  | -2.0624 | 0.40167 | -5.1346 | 2.83E-07 | 4.46E-05 | 602.207 | 1912.64 | 824.121 | 250.323 | 304.084 | 244.943 | Down |
| Irf5      | 1304.03 | 0.62229 | 0.21122 | 2.94622 | 0.00322  | 0.07154  | 1159.08 | 993.903 | 928.354 | 1427.35 | 2007.75 | 1307.73 | Up   |
| Cpa1      | 16.1836 | -1.2757 | 0.63519 | -2.0083 | 0.04461  | 0.37936  | 15.7697 | 21.7571 | 31.1724 | 6.13035 | 7.92401 | 14.3481 | Down |
| Mest      | 477.376 | -0.5136 | 0.1568  | -3.2753 | 0.00106  | 0.03241  | 504.632 | 589.419 | 590.328 | 356.582 | 404.124 | 419.17  | Down |
| Gm43748   | 77.7842 | -0.9171 | 0.44214 | -2.0742 | 0.03806  | 0.34886  | 76.8775 | 146.366 | 81.8276 | 49.0428 | 33.677  | 78.9147 | Down |
| 9330158H  | 103.842 | -1.9987 | 0.51409 | -3.8879 | 0.0001   | 0.00543  | 82.7911 | 297.676 | 117.871 | 35.7604 | 35.658  | 53.293  | Down |
| Chrm2     | 1364.8  | -0.9795 | 0.41717 | -2.3479 | 0.01888  | 0.23007  | 1544.45 | 2934.24 | 954.656 | 745.86  | 1334.2  | 675.387 | Down |
| Ptn       | 67.6345 | -1.491  | 0.50538 | -2.9503 | 0.00317  | 0.07075  | 63.079  | 162.189 | 74.0345 | 24.5214 | 29.715  | 52.2682 | Down |
| Tbxas1    | 661.55  | 0.97    | 0.31996 | 3.03163 | 0.00243  | 0.05803  | 576.581 | 410.418 | 354.586 | 831.684 | 1227.23 | 568.801 | Up   |
| Rab19     | 541.169 | 0.4392  | 0.15894 | 2.76332 | 0.00572  | 0.10587  | 522.373 | 434.153 | 421.802 | 651.861 | 640.854 | 575.975 | Up   |
| Trbv1     | 28.0799 | 1.40626 | 0.43676 | 3.21976 | 0.00128  | 0.03704  | 15.7697 | 11.8675 | 18.5086 | 41.8907 | 44.5725 | 35.8703 | Up   |
| Trbv19    | 23.296  | 1.35941 | 0.64876 | 2.0954  | 0.03614  | 0.33781  | 9.85609 | 7.91166 | 21.431  | 28.6083 | 52.4965 | 19.4725 | Up   |
| Trbc1     | 629.051 | 0.71578 | 0.17955 | 3.98654 | 6.70E-05 | 0.00394  | 474.078 | 430.197 | 524.087 | 882.771 | 807.258 | 655.914 | Up   |
| Trbc2     | 607.508 | 0.69218 | 0.20296 | 3.41047 | 0.00065  | 0.02315  | 527.301 | 402.506 | 463.69  | 900.14  | 720.094 | 631.317 | Up   |
| Trpv6     | 249.931 | 0.80955 | 0.21071 | 3.84196 | 0.00012  | 0.00631  | 220.776 | 173.068 | 150.991 | 304.474 | 339.742 | 310.534 | Up   |
| Clncl     | 40.0064 | -2.4969 | 0.76745 | -3.2535 | 0.00114  | 0.03414  | 73.9207 | 97.9068 | 32.1466 | 2.04345 | 23.772  | 10.2487 | Down |
| Ezh2      | 895.317 | 0.52597 | 0.18248 | 2.88238 | 0.00395  | 0.08203  | 808.199 | 682.381 | 711.121 | 1235.27 | 1063.8  | 871.136 | Up   |
| Pdia4     | 6896.82 | 0.34811 | 0.13461 | 2.58617 | 0.0097   | 0.14849  | 5848.6  | 5905.07 | 6452.69 | 7635.35 | 8650.04 | 6889.15 | Up   |
| Sspa      | 316.247 | -0.9408 | 0.31329 | -3.0031 | 0.00267  | 0.0618   | 253.301 | 566.673 | 427.647 | 208.432 | 244.654 | 196.774 | Down |
| Atp6v0e2  | 2078.86 | -0.3404 | 0.16842 | -2.0211 | 0.04327  | 0.37347  | 2247.19 | 2469.43 | 2252.21 | 1626.59 | 1664.04 | 2213.71 | Down |
| Gimap9    | 815.536 | 0.40897 | 0.17013 | 2.40389 | 0.01622  | 0.20901  | 609.106 | 687.326 | 805.613 | 1036.03 | 869.66  | 885.484 | Up   |
| Aoc1      | 1350.76 | -1.3873 | 0.40905 | -3.3914 | 0.0007   | 0.02422  | 1748.47 | 2717.66 | 1396.91 | 665.143 | 380.352 | 1196.02 | Down |
| Cycs      | 3702.9  | -0.5706 | 0.22588 | -2.526  | 0.01154  | 0.1652   | 3440.76 | 5952.54 | 3883.89 | 2980.37 | 2888.3  | 3071.52 | Down |
| Snx10     | 1848.94 | 0.57565 | 0.22863 | 2.51783 | 0.01181  | 0.16798  | 1709.05 | 1601.12 | 1144.61 | 2009.73 | 2752.6  | 1876.53 | Up   |
| Hoxa1     | 80.8329 | -0.8346 | 0.34333 | -2.4308 | 0.01507  | 0.19718  | 74.9063 | 135.487 | 100.336 | 50.0645 | 53.487  | 70.7157 | Down |
| Chhr2     | 68.6761 | -3.7054 | 0.74307 | -4.9865 | 6.15E-07 | 9.03E-05 | 82.7911 | 253.173 | 46.7587 | 3.06518 | 10.8955 | 15.373  | Down |
| Adcyap1r  | 322.795 | -0.8674 | 0.28144 | -3.0821 | 0.00206  | 0.05162  | 515.473 | 460.854 | 274.707 | 265.649 | 209.986 | 210.098 | Down |
| Pde1c     | 168.829 | -1.0727 | 0.37918 | -2.8291 | 0.00467  | 0.09198  | 133.057 | 341.191 | 212.362 | 86.8467 | 126.784 | 112.735 | Down |
| Herc6     | 1116.99 | 0.60191 | 0.25301 | 2.37897 | 0.01736  | 0.21785  | 925.487 | 819.846 | 916.664 | 1300.66 | 1806.67 | 932.628 | Up   |
| Gm5570    | 4.0578  | 5.48798 | 1.78302 | 3.0779  | 0.00208  | 0.05192  | 0       | 0       | 0       | 3.06518 | 6.93351 | 14.3481 | Up   |
| Tnlp3     | 143.974 | 0.91123 | 0.32197 | 2.83021 | 0.00465  | 0.09178  | 87.7192 | 120.653 | 91.569  | 198.215 | 241.682 | 124.009 | Up   |
| Ndnf      | 8173.38 | 0.61491 | 0.22927 | 2.68206 | 0.00732  | 0.12303  | 7189.03 | 6089.01 | 6094.21 | 12801.2 | 7161.32 | 9705.48 | Up   |
| Gm31520   | 32.8496 | -1.705  | 0.83234 | -2.0484 | 0.04052  | 0.36247  | 29.5683 | 98.8958 | 22.4052 | 18.3911 | 24.7625 | 3.0746  | Down |
| Mad211    | 612.694 | 0.47655 | 0.19236 | 2.47732 | 0.01324  | 0.18081  | 592.351 | 452.943 | 491.94  | 830.663 | 693.351 | 614.92  | Up   |
| 4930597C  | 1.96469 | -4.3995 | 2.07598 | -2.1192 | 0.03407  | NA       | 5.91365 | 1.97792 | 3.89655 | 0       | 0       | 0       | Down |
| Igkv9-124 | 41.7947 | 2.17842 | 0.98992 | 2.20062 | 0.02776  | 0.28797  | 13.7985 | 28.6798 | 2.92242 | 27.5866 | 163.433 | 14.3481 | Up   |
| Igkv1-122 | 52.5752 | 5.98259 | 1.28842 | 4.64334 | 3.43E-06 | 0.00036  | 1.97122 | 0.98896 | 1.94828 | 272.801 | 34.6675 | 3.0746  | Up   |
| Igkv17-12 | 109.756 | 2.42634 | 0.74864 | 3.24098 | 0.00119  | 0.03519  | 31.5395 | 44.5031 | 27.2759 | 112.39  | 411.058 | 31.7708 | Up   |
| Igkv1-117 | 581.089 | 3.41326 | 0.78755 | 4.33402 | 1.46E-05 | 0.00113  | 146.856 | 89.9952 | 62.3449 | 828.619 | 2053.31 | 305.41  | Up   |
| Igkv14-11 | 142.668 | 2.63719 | 0.81293 | 3.24404 | 0.00118  | 0.03499  | 21.6834 | 27.6908 | 69.1638 | 79.6946 | 596.282 | 61.492  | Up   |
| Igkv1-110 | 660.689 | 3.65286 | 0.45222 | 8.07755 | 6.61E-16 | 5.49E-13 | 137.985 | 69.2271 | 84.7501 | 877.662 | 2135.52 | 658.989 | Up   |
| Igkv2-109 | 81.0798 | 1.99815 | 0.65072 | 3.07066 | 0.00214  | 0.05296  | 67.0214 | 12.8565 | 17.5345 | 146.107 | 175.319 | 67.6411 | Up   |
| Igkv2-107 | 5.5827  | -2.1866 | 1.08629 | -2.0129 | 0.04412  | 0.37732  | 11.8273 | 4.94479 | 10.7155 | 1.02173 | 3.962   | 1.02487 | Down |
| Igkv16-10 | 53.817  | 1.75389 | 0.73813 | 2.37613 | 0.0175   | 0.21902  | 29.5683 | 30.6577 | 13.6379 | 127.716 | 106.974 | 14.3481 | Up   |
| Igkv10-96 | 302.745 | 3.36741 | 0.98103 | 3.43254 | 0.0006   | 0.02174  | 98.5609 | 35.6025 | 26.3017 | 122.01  | 192.157 | 240.843 | Up   |
| Igkv10-94 | 58.7339 | 2.3421  | 0.74125 | 3.15964 | 0.00158  | 0.04279  | 11.8273 | 30.6577 | 15.5862 | 114.433 | 161.452 | 18.4476 | Up   |
| Igkv19-93 | 130.554 | 2.53922 | 0.32353 | 7.84855 | 4.21E-15 | 3.25E-12 | 39.4243 | 38.5694 | 37.0173 | 191.063 | 305.074 | 172.177 | Up   |
| Igkv4-91  | 241.939 | 3.50231 | 1.07417 | 3.26049 | 0.00111  | 0.03359  | 39.4243 | 23.735  | 54.5518 | 363.734 | 926.118 | 44.0692 | Up   |
| Igkv4-86  | 37.2074 | 3.07743 | 1.0989  | 2.80046 | 0.0051   | 0.09743  | 7.88487 | 11.8675 | 3.89655 | 15.3259 | 5.94301 | 178.327 | Up   |
| Igkv13-84 | 61.5804 | 5.05289 | 1.14622 | 4.40831 | 1.04E-05 | 0.00086  | 4.92804 | 1.97792 | 3.89655 | 292.213 | 63.3921 | 3.0746  | Up   |
| Igkv4-80  | 48.1983 | 4.98999 | 1.02067 | 4.88893 | 1.01E-06 | 0.00013  | 3.94243 | 0       | 4.87069 | 27.5866 | 216.92  |         |      |

|           |         |         |         |         |          |          |         |         |         |         |         |         |      |
|-----------|---------|---------|---------|---------|----------|----------|---------|---------|---------|---------|---------|---------|------|
| Igkv4-53  | 116.287 | 2.03655 | 0.83094 | 2.45091 | 0.01425  | 0.1903   | 13.7985 | 78.1277 | 44.8104 | 425.038 | 99.0501 | 36.8952 | Up   |
| Igkv4-51  | 4.48928 | 3.67554 | 1.709   | 2.1507  | 0.0315   | 0.31075  | 0       | 0       | 1.94828 | 5.10863 | 17.829  | 2.04973 | Up   |
| Igkv4-50  | 34.9203 | 2.19756 | 1.06263 | 2.06803 | 0.03864  | 0.3525   | 1.97122 | 31.6467 | 3.89655 | 107.281 | 54.4775 | 10.2487 | Up   |
| Igkv5-48  | 92.796  | 1.64764 | 0.62052 | 2.65525 | 0.00792  | 0.12926  | 82.7911 | 20.7681 | 31.1724 | 127.716 | 230.787 | 63.5417 | Up   |
| Igkv5-45  | 33.216  | 4.42765 | 1.09876 | 4.02967 | 5.59E-05 | 0.00344  | 5.91365 | 0.98896 | 1.94828 | 132.824 | 52.4965 | 5.12433 | Up   |
| Igkv12-44 | 293.121 | 4.68518 | 0.95407 | 4.91076 | 9.07E-07 | 0.00012  | 25.6258 | 15.8233 | 24.3535 | 771.403 | 851.831 | 69.6909 | Up   |
| Igkv5-43  | 261.943 | 4.28316 | 1.29586 | 3.30527 | 0.00095  | 0.03031  | 30.5539 | 29.6687 | 16.5604 | 1059.53 | 419.972 | 15.373  | Up   |
| Igkv12-41 | 48.6502 | 1.86838 | 0.69718 | 2.6799  | 0.00736  | 0.1232   | 22.669  | 9.88958 | 30.1983 | 85.8249 | 122.822 | 20.4973 | Up   |
| Igkv8-27  | 49.0756 | 3.06352 | 0.74398 | 4.11772 | 3.83E-05 | 0.00254  | 21.6834 | 2.96687 | 6.81897 | 55.1732 | 154.518 | 53.293  | Up   |
| Igkv6-25  | 61.0179 | 2.72235 | 0.584   | 4.66158 | 3.14E-06 | 0.00034  | 23.6546 | 10.8785 | 13.6379 | 54.1514 | 77.2591 | 186.526 | Up   |
| Igkv8-24  | 65.107  | 2.46767 | 0.73066 | 3.37733 | 0.00073  | 0.02509  | 16.7553 | 12.8565 | 30.1983 | 60.2818 | 236.73  | 33.8206 | Up   |
| Igkv6-23  | 80.301  | 2.17461 | 0.59462 | 3.65715 | 0.00026  | 0.01133  | 37.4531 | 15.8233 | 34.0948 | 154.281 | 197.11  | 43.0444 | Up   |
| Igkv8-21  | 131.622 | 4.49996 | 1.42755 | 3.15222 | 0.00162  | 0.04341  | 18.7266 | 5.93375 | 8.76725 | 69.4773 | 674.531 | 12.2984 | Up   |
| Igkv8-19  | 60.1439 | 2.80957 | 0.74097 | 3.79176 | 0.00015  | 0.00739  | 9.85609 | 5.93375 | 29.2242 | 191.063 | 36.6485 | 88.1385 | Up   |
| Igkv6-17  | 283.327 | 3.68027 | 1.11535 | 3.29965 | 0.00097  | 0.0307   | 68.007  | 30.6577 | 24.3535 | 468.972 | 1060.83 | 47.1438 | Up   |
| Igkv6-15  | 218.157 | 2.66581 | 0.69997 | 3.80849 | 0.00014  | 0.00701  | 79.8343 | 63.2933 | 35.069  | 813.293 | 243.663 | 73.7903 | Up   |
| Igkv6-14  | 32.3878 | 3.31882 | 0.80532 | 4.12112 | 3.77E-05 | 0.00252  | 5.91365 | 6.92271 | 4.87069 | 95.0205 | 70.3256 | 11.2735 | Up   |
| Igkv3-12  | 106.483 | 2.91531 | 0.89028 | 3.27461 | 0.00106  | 0.03241  | 33.5107 | 24.724  | 16.5604 | 51.0863 | 485.345 | 27.6714 | Up   |
| Igkv3-10  | 238.287 | 4.78101 | 1.47513 | 3.24108 | 0.00119  | 0.03519  | 18.7266 | 18.7902 | 12.6638 | 67.4339 | 1291.61 | 20.4973 | Up   |
| Igkv3-7   | 57.3393 | 2.91723 | 0.72867 | 4.00351 | 6.24E-05 | 0.00372  | 14.7841 | 5.93375 | 19.4828 | 208.432 | 56.4585 | 38.9449 | Up   |
| Igkv3-5   | 195.928 | 4.81627 | 1.10156 | 4.37224 | 1.23E-05 | 0.00099  | 25.6258 | 3.95583 | 10.7155 | 190.041 | 847.869 | 97.3623 | Up   |
| Igkv3-4   | 136.955 | 2.79765 | 1.30572 | 2.14262 | 0.03214  | 0.31414  | 54.2085 | 27.6908 | 21.431  | 90.9336 | 613.12  | 14.3481 | Up   |
| Igkv3-1   | 29.1482 | 2.74814 | 0.93187 | 2.94908 | 0.00319  | 0.07096  | 5.91365 | 12.8565 | 3.89655 | 110.346 | 33.677  | 8.19893 | Up   |
| Gm30211   | 788.32  | 1.10608 | 0.46905 | 2.35812 | 0.01837  | 0.22573  | 694.854 | 448.987 | 356.535 | 1136.16 | 1695.74 | 397.648 | Up   |
| Smyd1     | 805.262 | -2.0148 | 0.42815 | -4.7057 | 2.53E-06 | 0.00028  | 953.084 | 2252.85 | 667.285 | 281.996 | 415.02  | 261.341 | Down |
| Cd8b1     | 364.26  | 0.88124 | 0.20034 | 4.39877 | 1.09E-05 | 0.00089  | 255.273 | 216.582 | 297.112 | 540.493 | 447.706 | 428.394 | Up   |
| Cd8a      | 454.155 | 0.87651 | 0.16514 | 5.30765 | 1.11E-07 | 2.05E-05 | 314.409 | 294.71  | 351.664 | 659.013 | 551.709 | 553.428 | Up   |
| Mat2a     | 25011.1 | -0.4815 | 0.15237 | -3.16   | 0.00158  | 0.04279  | 24107   | 32833.4 | 30499.3 | 20341.5 | 21370.1 | 20915.5 | Down |
| Capg      | 2781.42 | 0.71431 | 0.24344 | 2.93431 | 0.00334  | 0.07329  | 2697.61 | 1844.41 | 1777.8  | 3449.34 | 4239.34 | 2680.02 | Up   |
| Tgoln1    | 9409.15 | 0.37239 | 0.17634 | 2.1118  | 0.0347   | 0.32919  | 8584.65 | 8147.04 | 7872.99 | 10089.5 | 12976.6 | 8784.13 | Up   |
| Suc1g1    | 5840.05 | -0.3495 | 0.17823 | -1.9609 | 0.04989  | 0.39986  | 5824.95 | 7833.54 | 5973.42 | 4889.98 | 4660.31 | 5858.13 | Down |
| Reg1      | 6.90288 | -5.2152 | 1.63081 | -3.1979 | 0.00138  | 0.03942  | 4.92804 | 28.6798 | 6.81897 | 0       | 0.9905  | 0       | Down |
| Gm20383   | 20.0437 | -3.4351 | 0.77589 | -4.4273 | 9.54E-06 | 0.00081  | 27.597  | 40.5473 | 41.888  | 6.13035 | 0       | 4.09946 | Down |
| Eva1a     | 485.292 | -0.9128 | 0.25529 | -3.5756 | 0.00035  | 0.01451  | 518.43  | 638.867 | 744.242 | 350.452 | 243.663 | 416.096 | Down |
| Tacr1     | 194.498 | -2.6916 | 0.56079 | -4.7997 | 1.59E-06 | 0.00019  | 366.646 | 398.55  | 245.483 | 42.9125 | 99.0501 | 14.3481 | Down |
| Dok1      | 1157.91 | 0.40659 | 0.18723 | 2.17161 | 0.02988  | 0.30087  | 1162.03 | 841.603 | 983.88  | 1283.29 | 1515.47 | 1161.17 | Up   |
| Lbx2      | 87.1344 | 0.68477 | 0.28142 | 2.43325 | 0.01496  | 0.19658  | 79.8343 | 54.3927 | 66.2414 | 110.346 | 93.1071 | 118.884 | Up   |
| Actg2     | 1469.14 | -1.2486 | 0.37161 | -3.3598 | 0.00078  | 0.02626  | 1136.41 | 2853.14 | 2214.22 | 819.424 | 585.386 | 1206.27 | Down |
| Stambp    | 2223.48 | -0.3084 | 0.13437 | -2.2954 | 0.02171  | 0.25084  | 2280.7  | 2359.65 | 2740.25 | 2059.8  | 1836.39 | 2064.08 | Down |
| Gm7443    | 4.19648 | 2.91221 | 1.47323 | 1.97676 | 0.04807  | 0.3926   | 2.95683 | 0       | 0       | 5.10863 | 8.91451 | 8.19893 | Up   |
| Dysf      | 1762.85 | -0.4477 | 0.18771 | -2.385  | 0.01708  | 0.21608  | 1594.71 | 2247.9  | 2260    | 1562.22 | 1576.88 | 1335.4  | Down |
| Cyp26b1   | 2438.16 | -0.9921 | 0.45589 | -2.1763 | 0.02954  | 0.29903  | 3012.02 | 2881.82 | 3841.03 | 3063.13 | 1107.38 | 723.555 | Down |
| Spr-ps1   | 29.0957 | -3.1902 | 0.59386 | -5.3719 | 7.79E-08 | 1.52E-05 | 32.5251 | 71.205  | 53.5776 | 6.13035 | 3.962   | 7.17406 | Down |
| Nat8f7    | 125.861 | -0.5289 | 0.26442 | -2      | 0.0455   | 0.38155  | 168.539 | 115.708 | 161.707 | 112.39  | 87.1641 | 109.661 | Down |
| Nat8f3    | 160.006 | 0.60619 | 0.30275 | 2.00228 | 0.04525  | 0.3813   | 175.438 | 106.807 | 98.388  | 228.866 | 176.309 | 174.227 | Up   |
| Alms1-ps1 | 50.0651 | 1.14677 | 0.52292 | 2.19299 | 0.02831  | 0.29049  | 54.2085 | 18.7902 | 20.4569 | 58.2383 | 56.4585 | 92.2379 | Up   |
| Nat8f6    | 41.8784 | -1.5865 | 0.3855  | -4.1154 | 3.87E-05 | 0.00255  | 58.1509 | 51.4258 | 78.9052 | 21.4562 | 19.81   | 21.5222 | Down |
| Dusp11    | 10259.6 | 0.20967 | 0.09541 | 2.19765 | 0.02797  | 0.28884  | 10053.2 | 9091.49 | 9401.41 | 10987.6 | 11212.5 | 10811.3 | Up   |
| Tgfa      | 1954.74 | 0.28603 | 0.11339 | 2.52261 | 0.01165  | 0.16637  | 1677.51 | 1764.3  | 1843.07 | 2047.54 | 2293.01 | 2103.02 | Up   |
| Pcyox1    | 4896.11 | 0.41453 | 0.20695 | 2.00306 | 0.04517  | 0.38075  | 5168.53 | 3784.74 | 3639.38 | 5551.03 | 6573.95 | 4659.04 | Up   |
| Gm28719   | 65.5512 | -1.7772 | 0.45829 | -3.8779 | 0.00011  | 0.00562  | 56.1797 | 125.598 | 122.741 | 19.4128 | 38.6295 | 30.746  | Down |
| Gm44386   | 29.8143 | -3.3217 | 0.73243 | -4.5352 | 5.76E-06 | 0.00057  | 39.4243 | 92.9621 | 30.1983 | 9.19553 | 1.981   | 5.12433 | Down |
| Anxa4     | 12295.6 | 0.24144 | 0.12267 | 1.96828 | 0.04904  | 0.3969   | 12520.2 | 10295.1 | 10992.2 | 13776.9 | 12821   | 13368.4 | Up   |
| Aak1      | 3661.39 | 0.24338 | 0.09758 | 2.49408 | 0.01263  | 0.17504  | 3318.54 | 3341.69 | 3399.74 | 3914.23 | 4188.83 | 3805.33 | Up   |
| Gkn3      | 115.58  | 1.82673 | 0.37244 | 4.90479 | 9.35E-07 | 0.00013  | 37.4531 | 75.1608 | 39.9397 | 138.955 | 229.796 | 172.177 | Up   |
| Arhgap25  | 1200.15 | 0.57391 | 0.19776 | 2.90203 | 0.00371  | 0.07796  | 1142.32 | 835.67  | 915.69  | 1549.96 | 1583.81 | 1173.47 | Up   |
| Prokr1    | 32.2491 | 1.48248 | 0.64522 | 2.29764 | 0.02158  | 0.25004  | 9.85609 | 15.8233 | 25.3276 | 28.6083 | 85.1831 | 28.6962 | Up   |
| 1810020C  | 442.015 | -0.5551 | 0.27028 | -2.0537 | 0.04     | 0.36025  | 482.948 | 589.419 | 505.578 | 310.605 | 265.454 | 498.085 | Down |
| Kbtbd12   | 50.036  | -2.1744 | 0.78823 | -2.7586 | 0.00581  | 0.10597  | 50.266  | 177.023 | 18.5086 | 10.2173 | 25.753  | 18.4476 | Down |
| Mcm2      | 869.22  | 0.40209 | 0.17882 | 2.2486  | 0.02454  | 0.27035  | 904.789 | 677.436 | 664.362 | 1059.53 | 919.185 | 990.02  | Up   |
| 4933427D  | 117.21  | -0.7185 | 0.35474 | -2.0254 | 0.04282  | 0.37291  | 164.597 | 142.41  | 130.535 | 67.4339 | 133.718 | 64.5665 | Down |
| Slc41a3   | 690.664 | -0.7822 | 0.28522 | -2.7424 | 0.0061   | 0.10923  | 651.487 | 1246.09 | 722.811 | 506.776 | 586.377 | 430.444 | Down |
| Fbln2     | 864.352 | -1.1008 | 0.20278 | -5.4288 | 5.67E-08 | 1.17E-05 | 1145.28 | 1445.86 | 945.889 | 605.883 | 534.87  | 508.333 | Down |
| Lmod3     | 97.7199 | -3.9279 | 0.71153 | -5.5203 | 3.38E-08 | 7.53E-06 | 116.302 | 355.036 | 78.9052 | 9.19553 | 22.7815 | 4.09946 | Down |
| Cav3      | 138.878 | -1.8788 | 0.43148 | -4.3543 | 1.34E-05 | 0.00105  | 155.726 | 368.881 | 130.535 | 61.3035 | 59.4301 | 57.3925 | Down |
| Mtmr14    | 2081.22 | 0.20788 | 0.1054  | 1.97237 | 0.04857  | 0.39474  | 1971.22 | 1885.94 | 1937.56 | 2144.6  | 2373.24 | 2174.77 | Up   |
| Cidec     | 978.753 | -1.6267 | 0.47154 | -3.4497 | 0.00056  | 0.02074  | 1178.79 | 2648.43 | 608.837 | 523.123 | 585.386 | 327.957 | Down |
| Cand2     | 284.568 | -1.4134 | 0.3203  | -4.4126 | 1.02E-05 | 0.00085  | 320.323 | 616.121 | 304.905 | 152.237 | 141.642 | 172.177 | Down |
| Gm4640    | 23.769  | -1.0515 | 0.4866  | -2.1608 | 0.03071  | 0.30647  | 30.5539 | 27.6908 | 37.9914 | 14.3042 | 20.8005 | 11.2735 | Down |
| Ret       | 1592.87 | 0.23799 | 0.11972 | 1.98783 | 0.04683  | 0.38762  | 1510.94 | 1343.01 | 1531.35 | 1657.24 | 1700.69 | 1814.01 | Up   |
| Tmem121   | 163.77  | 0.54391 | 0.24485 | 2.22145 | 0.02632  | 0.2807   | 154.741 | 98.8958 | 146.121 | 201.28  | 197.11  | 184.476 | Up   |
| Bid       | 628.787 | 0.30736 | 0.14555 | 2.11166 | 0.03472  | 0.32919  | 530.257 | 565.684 | 590.328 | 649.817 | 774.572 | 662.063 | Up   |
| Slc6a13   | 34.2213 | -4.1246 | 0.75338 | -5.4747 | 4.38E-08 | 9.56E-06 | 49.2804 | 114.719 | 30.1983 | 2.04345 | 3.962   | 5.12433 | Down |
| Gm6637    | 18.5521 | 1.22113 | 0.51868 | 2.35431 | 0.01856  | 0.22731  | 8.87048 | 12.8565 | 11.6897 | 29.63   | 26.7435 | 21.5222 | Up   |
| Gdf3      | 20.8774 | 5.97068 | 1.29353 | 4.6158  | 3.92E-06 | 0.0004   | 1.97122 | 0       | 0       | 27.5866 | 77.2591 | 18.4476 | Up   |
| Dppa3     | 2.70693 | 4.90373 | 1.84076 | 2.66398 | 0.00772  | 0.1274   | 0       | 0       | 0       | 6.13035 | 3.962   | 6.1492  | Up   |
| Clec4a3   | 779.55  | 1.34611 | 0.34847 | 3.8629  | 0.00011  | 0.00591  |         |         |         |         |         |         |      |

|           |         |         |         |         |          |          |         |         |         |         |         |         |      |
|-----------|---------|---------|---------|---------|----------|----------|---------|---------|---------|---------|---------|---------|------|
| Ptpn6     | 2446.77 | 0.51644 | 0.21714 | 2.37839 | 0.01739  | 0.21806  | 2419.67 | 1880.01 | 1740.79 | 2894.55 | 3479.63 | 2265.98 | Up   |
| Eno2      | 353.397 | -0.4579 | 0.22969 | -1.9934 | 0.04622  | 0.38473  | 330.179 | 492.501 | 404.268 | 309.583 | 245.644 | 338.206 | Down |
| Cdca3     | 222.071 | 0.9479  | 0.41284 | 2.29605 | 0.02167  | 0.25055  | 112.359 | 237.35  | 105.207 | 421.973 | 251.587 | 203.948 | Up   |
| Cd4       | 435.142 | 1.00865 | 0.37885 | 2.66241 | 0.00776  | 0.12767  | 350.877 | 239.328 | 276.655 | 617.122 | 840.935 | 285.938 | Up   |
| Cd9       | 25836.3 | 0.26207 | 0.09841 | 2.66297 | 0.00775  | 0.12767  | 24629.4 | 22399.9 | 23459.2 | 29053.8 | 28599.7 | 26876.1 | Up   |
| Vwf       | 30169   | 0.62737 | 0.21491 | 2.91923 | 0.00351  | 0.07495  | 21600.6 | 27165.7 | 22366.2 | 35934.1 | 46023.6 | 27923.5 | Up   |
| Gm29009   | 37.2759 | -1.8272 | 0.79504 | -2.2983 | 0.02155  | 0.25004  | 27.597  | 119.664 | 27.2759 | 11.239  | 30.7055 | 7.17406 | Down |
| Kcna5     | 43.367  | -1.672  | 0.72882 | -2.2941 | 0.02178  | 0.2515   | 29.5683 | 124.609 | 43.8362 | 17.3693 | 7.92401 | 36.8952 | Down |
| Rad51ap1  | 95.1361 | 1.38272 | 0.41762 | 3.31095 | 0.00093  | 0.02986  | 59.1365 | 48.4589 | 50.6552 | 169.606 | 175.319 | 67.6411 | Up   |
| Cracr2a   | 2935.33 | 0.2839  | 0.13792 | 2.05851 | 0.03954  | 0.35848  | 2995.26 | 2562.39 | 2384.69 | 3077.44 | 3183.47 | 3408.7  | Up   |
| Tspan11   | 3872.49 | 0.63387 | 0.21156 | 2.99621 | 0.00273  | 0.0628   | 2700.57 | 3000.5  | 3404.61 | 4146.16 | 6059.88 | 3923.19 | Up   |
| 9330102Ei | 71.2265 | -1.3236 | 0.51406 | -2.5747 | 0.01003  | 0.15202  | 120.244 | 135.487 | 49.6811 | 44.9559 | 55.468  | 21.5222 | Down |
| A2ml1     | 1967.46 | -1.5133 | 0.75367 | -2.0079 | 0.04465  | 0.37936  | 1494.18 | 6146.37 | 1101.75 | 1106.53 | 990.501 | 965.424 | Down |
| BC035044  | 179.59  | 0.68662 | 0.26033 | 2.6375  | 0.00835  | 0.134    | 111.374 | 171.09  | 130.535 | 209.454 | 264.464 | 190.625 | Up   |
| Clec2g    | 248.851 | 1.28587 | 0.5483  | 2.34521 | 0.01902  | 0.23116  | 55.1941 | 138.454 | 240.612 | 321.843 | 557.652 | 179.352 | Up   |
| BC064078  | 698.431 | -1.1528 | 0.42531 | -2.7106 | 0.00672  | 0.11632  | 1467.57 | 1024.56 | 398.423 | 426.059 | 331.818 | 542.154 | Down |
| Clec12a   | 830.448 | 0.63678 | 0.18527 | 3.43706 | 0.00059  | 0.02146  | 637.689 | 752.597 | 560.13  | 911.379 | 1168.79 | 952.1   | Up   |
| Clec1b    | 877.626 | 0.49431 | 0.1947  | 2.53885 | 0.01112  | 0.16205  | 606.149 | 850.504 | 729.63  | 979.835 | 1190.58 | 909.056 | Up   |
| Clec7a    | 2818.48 | 1.43756 | 0.68786 | 2.0899  | 0.03663  | 0.3402   | 2651.29 | 1254    | 654.621 | 4085.88 | 6098.51 | 2166.57 | Up   |
| Olr1      | 628.916 | 1.7297  | 0.50412 | 3.43113 | 0.0006   | 0.02181  | 487.876 | 234.383 | 151.966 | 1146.38 | 1348.07 | 404.822 | Up   |
| Klrd1     | 564.941 | 0.6728  | 0.23303 | 2.88713 | 0.00389  | 0.08104  | 353.834 | 533.048 | 419.854 | 651.861 | 846.878 | 584.174 | Up   |
| Klrk1     | 421.551 | 0.92565 | 0.33187 | 2.78919 | 0.00528  | 0.09992  | 205.992 | 329.323 | 337.052 | 490.428 | 791.41  | 375.101 | Up   |
| Klrc2     | 178.799 | 0.69799 | 0.34578 | 2.0186  | 0.04353  | 0.37421  | 93.6328 | 189.88  | 125.664 | 198.215 | 292.198 | 173.202 | Up   |
| Klrc1     | 127.45  | 1.12248 | 0.31509 | 3.56238 | 0.00037  | 0.01496  | 57.1653 | 91.9731 | 91.569  | 180.845 | 211.967 | 131.183 | Up   |
| Klra6     | 8.03598 | 2.36159 | 1.13908 | 2.07325 | 0.03815  | 0.34953  | 0       | 3.95583 | 3.89655 | 4.0869  | 17.829  | 18.4476 | Up   |
| Klra2     | 377.758 | 1.36733 | 0.33203 | 4.1181  | 3.82E-05 | 0.00254  | 163.611 | 262.074 | 207.492 | 582.383 | 724.056 | 326.932 | Up   |
| Magohb    | 524.046 | -0.6341 | 0.28883 | -2.1953 | 0.02814  | 0.28977  | 801.3   | 668.536 | 442.259 | 496.559 | 302.103 | 433.518 | Down |
| Apold1    | 139.948 | -0.9827 | 0.3987  | -2.4647 | 0.01371  | 0.18549  | 101.518 | 266.03  | 189.957 | 105.238 | 69.3351 | 107.611 | Down |
| Gprc5a    | 38965.7 | 0.52632 | 0.19061 | 2.76119 | 0.00576  | 0.10589  | 28272.2 | 27889.6 | 39645.5 | 51534.8 | 41072.1 | 45380   | Up   |
| Gm6728    | 43.9194 | -2.3299 | 0.9055  | -2.5731 | 0.01008  | 0.15228  | 174.453 | 34.6135 | 10.7155 | 19.4128 | 7.92401 | 16.3979 | Down |
| Pldb1     | 3041.44 | 0.39949 | 0.20263 | 1.97156 | 0.04866  | 0.39489  | 2774.49 | 2858.09 | 2236.62 | 2955.85 | 4327.5  | 3096.12 | Up   |
| Gucy2c    | 105.105 | 0.8836  | 0.39667 | 2.22755 | 0.02591  | 0.27838  | 50.266  | 57.3596 | 113.974 | 146.107 | 102.022 | 160.904 | Up   |
| BC049715  | 72.2088 | -1.8477 | 0.54538 | -3.3879 | 0.0007   | 0.02445  | 163.611 | 136.476 | 38.9655 | 26.5649 | 29.715  | 37.92   | Down |
| Art4      | 1182.2  | 0.6692  | 0.2464  | 2.71588 | 0.00661  | 0.11532  | 646.559 | 871.272 | 1220.6  | 1557.11 | 1454.06 | 1343.6  | Up   |
| Arhgdib   | 192.397 | 0.43127 | 0.18973 | 2.27311 | 0.02302  | 0.25972  | 148.827 | 185.924 | 156.836 | 214.562 | 225.834 | 222.396 | Up   |
| Ptpro     | 369.904 | 0.60214 | 0.2868  | 2.09949 | 0.03577  | 0.33545  | 286.812 | 358.992 | 235.742 | 343.3   | 607.177 | 387.399 | Up   |
| Pik3c2g   | 194.637 | 0.93742 | 0.44086 | 2.12632 | 0.03348  | 0.32299  | 82.7911 | 149.333 | 168.526 | 219.671 | 407.096 | 140.407 | Up   |
| Sloc1a4   | 7.91836 | -1.8801 | 0.83204 | -2.2597 | 0.02384  | 0.26511  | 8.87048 | 14.8344 | 13.6379 | 4.0869  | 1.981   | 4.09946 | Down |
| Gys2      | 24.3716 | -4.2942 | 0.96214 | -4.4632 | 8.08E-06 | 0.00073  | 25.6258 | 98.8958 | 14.6121 | 3.06518 | 1.981   | 2.04973 | Down |
| Abcc9     | 924.877 | -0.4694 | 0.22073 | -2.1265 | 0.03346  | 0.32299  | 925.487 | 1343.99 | 952.708 | 745.86  | 920.175 | 661.038 | Down |
| Gm15707   | 7.74674 | -2.0332 | 0.91544 | -2.221  | 0.02635  | 0.28075  | 12.8129 | 11.8675 | 12.6638 | 6.13035 | 1.981   | 1.02487 | Down |
| Lmntd1    | 404.974 | -0.632  | 0.19993 | -3.1612 | 0.00157  | 0.04279  | 423.812 | 589.419 | 463.69  | 343.3   | 329.837 | 279.788 | Down |
| Tuba3b    | 5.10404 | -3.193  | 1.47762 | -2.1609 | 0.0307   | 0.30647  | 2.95683 | 20.7681 | 3.89655 | 1.02173 | 1.981   | 0       | Down |
| Gm15762   | 22.6034 | -2.6943 | 1.22616 | -2.1973 | 0.028    | 0.28884  | 2.95683 | 36.5914 | 77.9311 | 10.2173 | 7.92401 | 0       | Down |
| Far2      | 96.3928 | 0.54894 | 0.25708 | 2.13533 | 0.03273  | 0.31785  | 70.9638 | 74.1719 | 89.6207 | 127.716 | 99.0501 | 116.835 | Up   |
| 3300002P  | 2.03618 | 4.49249 | 2.06097 | 2.1798  | 0.02927  | NA       | 0       | 0       | 0       | 4.0869  | 1.981   | 6.1492  | Up   |
| Pirb      | 1347.74 | 0.72453 | 0.34848 | 2.07909 | 0.03761  | 0.34589  | 1240.88 | 1104.67 | 703.328 | 1596.96 | 2447.53 | 993.095 | Up   |
| Gm15448   | 34.4077 | 1.12464 | 0.43938 | 2.55957 | 0.01048  | 0.15619  | 29.5683 | 19.7792 | 15.5862 | 36.7821 | 53.487  | 51.2433 | Up   |
| Pira2     | 16.9352 | 1.80376 | 0.89378 | 2.01812 | 0.04358  | 0.37434  | 11.8273 | 6.92271 | 3.89655 | 13.2824 | 56.4585 | 9.22379 | Up   |
| Lair1     | 542.317 | 1.12801 | 0.42131 | 2.67736 | 0.00742  | 0.12358  | 486.891 | 313.5   | 221.129 | 648.796 | 1176.72 | 406.872 | Up   |
| Lilra5    | 617.035 | 1.22715 | 0.4757  | 2.57968 | 0.00989  | 0.15061  | 534.2   | 338.224 | 235.742 | 698.86  | 1500.61 | 394.573 | Up   |
| Gm15931   | 120.955 | 1.45593 | 0.64937 | 2.24205 | 0.02496  | 0.27329  | 107.431 | 50.4369 | 36.0431 | 127.716 | 345.685 | 58.4174 | Up   |
| Rdh13     | 1104.66 | -0.468  | 0.15999 | -2.9251 | 0.00344  | 0.07458  | 1139.36 | 1384.54 | 1322.88 | 823.511 | 910.27  | 1047.41 | Down |
| Gm15494   | 146.367 | 2.51712 | 0.38624 | 6.517   | 7.17E-11 | 2.87E-08 | 40.41   | 38.5694 | 51.6293 | 177.78  | 384.314 | 185.501 | Up   |
| Tnnt1     | 155.857 | -2.1657 | 0.36696 | -5.9019 | 3.59E-09 | 1.08E-06 | 152.769 | 333.279 | 278.604 | 56.1949 | 43.582  | 70.7157 | Down |
| Tnni3     | 5257.57 | -3.2666 | 0.45123 | -7.2393 | 4.51E-13 | 2.50E-10 | 5762.85 | 16382.1 | 6431.26 | 555.819 | 1481.79 | 931.603 | Down |
| Ube2s     | 2856.53 | 0.24599 | 0.12171 | 2.02117 | 0.04326  | 0.37347  | 2619.75 | 2697.88 | 2523.02 | 3160.2  | 2794.2  | 3344.14 | Up   |
| Shisa7    | 181.034 | 1.00025 | 0.26318 | 3.80068 | 0.00014  | 0.0072   | 146.856 | 121.642 | 93.5173 | 258.497 | 195.129 | 270.565 | Up   |
| Isoc2b    | 372.418 | 1.22756 | 0.36588 | 3.35504 | 0.00079  | 0.02644  | 329.193 | 229.438 | 110.078 | 497.58  | 493.269 | 574.95  | Up   |
| Isoc2a    | 1618.52 | 0.25347 | 0.12074 | 2.09925 | 0.03579  | 0.3355   | 1588.8  | 1485.42 | 1356    | 1705.26 | 1835.4  | 1740.22 | Up   |
| Sbk2      | 273.702 | -3.4443 | 0.92316 | -3.731  | 0.00019  | 0.00911  | 382.416 | 939.51  | 182.164 | 25.5431 | 93.1071 | 19.4725 | Down |
| Sbk3      | 946.711 | -4.0583 | 0.81155 | -5.0007 | 5.71E-07 | 8.45E-05 | 1432.09 | 3045    | 881.595 | 72.5425 | 207.015 | 42.0195 | Down |
| Zfp579    | 2582.15 | -0.2302 | 0.10829 | -2.1257 | 0.03353  | 0.32299  | 2864.18 | 2597    | 2901.96 | 2384.71 | 2454.46 | 2290.58 | Down |
| Zim1      | 9.86878 | -3.1395 | 1.09561 | -2.8656 | 0.00416  | 0.08496  | 9.85609 | 32.6356 | 10.7155 | 2.04345 | 3.962   | 0       | Down |
| Peg3      | 714.448 | -0.4316 | 0.20326 | -2.1233 | 0.03373  | 0.32401  | 651.487 | 924.676 | 885.492 | 535.384 | 698.303 | 591.348 | Down |
| Zfp264    | 42.6957 | -6.9703 | 1.13314 | -6.1513 | 7.69E-10 | 2.63E-07 | 91.6616 | 50.4369 | 112.026 | 0       | 0       | 2.04973 | Down |
| Zfp773    | 158.553 | -0.5896 | 0.30064 | -1.961  | 0.04988  | 0.39986  | 220.776 | 203.725 | 147.095 | 142.02  | 149.566 | 88.1385 | Down |
| Gm45844   | 229.721 | 0.53908 | 0.182   | 2.962   | 0.00306  | 0.06875  | 187.266 | 165.156 | 209.44  | 262.583 | 282.293 | 271.589 | Up   |
| Zscan18   | 522.148 | -0.3318 | 0.12814 | -2.5893 | 0.00962  | 0.14749  | 573.624 | 600.298 | 571.819 | 485.32  | 444.735 | 457.09  | Down |
| Lig1      | 808.774 | 0.33438 | 0.15981 | 2.09235 | 0.03641  | 0.33907  | 743.149 | 680.403 | 722.811 | 1047.27 | 863.717 | 795.296 | Up   |
| Sult2a2   | 28.5918 | 2.79464 | 0.74828 | 3.73475 | 0.00019  | 0.00902  | 8.87048 | 3.95583 | 8.76725 | 70.4991 | 13.867  | 65.5914 | Up   |
| Sult2a1   | 254.335 | 5.1641  | 1.78948 | 2.88581 | 0.0039   | 0.0813   | 37.4531 | 3.95583 | 0       | 724.403 | 66.3636 | 693.834 | Up   |
| Dhx34     | 1122.19 | -0.2231 | 0.10442 | -2.1362 | 0.03266  | 0.31743  | 1170.9  | 1210.48 | 1244.95 | 1031.94 | 1047.95 | 1026.92 | Down |
| C5ar2     | 122.234 | 0.97122 | 0.33806 | 2.8729  | 0.00407  | 0.08354  | 94.6184 | 81.0946 | 72.0863 | 144.063 | 228.806 | 112.735 | Up   |
| Dact3     | 833.22  | -0.3636 | 0.15356 | -2.3681 | 0.01788  | 0.22242  | 1067.41 | 905.886 | 839.707 | 709.077 | 697.313 | 779.923 | Down |
| Ptgir     | 333.842 | 0.77038 | 0.37726 | 2.04204 | 0.04115  | 0.36537  | 308.496 | 217.571 | 214.31  | 388.256 | 643.826 | 230.595 | Up   |
| Dmpk      | 3114.48 | -0.9442 | 0.21419 | -4.4084 | 1.04E-05 | 0.00086  | 3576.77 | 5403.67 | 3315.97 | 2035.28 | 2170.19 | 2185.01 | Down |
| Gpr4      | 956.04  |         |         |         |          |          |         |         |         |         |         |         |      |

|           |         |         |         |         |          |          |         |         |         |         |         |         |      |
|-----------|---------|---------|---------|---------|----------|----------|---------|---------|---------|---------|---------|---------|------|
| Gm16251   | 11.7772 | -3.7026 | 1.04369 | -3.5475 | 0.00039  | 0.0157   | 11.8273 | 15.8233 | 37.9914 | 0       | 2.9715  | 2.04973 | Down |
| Nlrp4e    | 56.6817 | -1.2308 | 0.60219 | -2.0438 | 0.04097  | 0.36426  | 29.5683 | 91.9731 | 116.897 | 25.5431 | 21.791  | 54.3179 | Down |
| Zfp61     | 747.989 | -0.4428 | 0.12143 | -3.6468 | 0.00027  | 0.0117   | 905.774 | 815.89  | 864.061 | 638.578 | 650.759 | 612.87  | Down |
| Lypd5     | 22.2149 | -3.0711 | 0.70654 | -4.3466 | 1.38E-05 | 0.00108  | 43.3668 | 49.4479 | 26.3017 | 1.02173 | 4.9525  | 8.19893 | Down |
| Cadm4     | 526.076 | -0.4301 | 0.21879 | -1.9659 | 0.04931  | 0.39793  | 538.142 | 743.696 | 529.931 | 530.275 | 423.934 | 390.474 | Down |
| Zfp575    | 9.21456 | -2.5474 | 0.90052 | -2.8288 | 0.00467  | 0.09198  | 9.85609 | 23.735  | 13.6379 | 1.02173 | 3.962   | 3.0746  | Down |
| Tgfb1     | 3780.54 | 0.44694 | 0.19419 | 2.30159 | 0.02136  | 0.24952  | 3447.66 | 3022.26 | 3128.93 | 4484.35 | 5246.68 | 3353.36 | Up   |
| Axl       | 5879.6  | 0.52512 | 0.25098 | 2.0923  | 0.03641  | 0.33907  | 5480.97 | 4763.81 | 4218.99 | 6932.41 | 9109.64 | 4771.78 | Up   |
| Cyp2a21-  | 38.905  | -1.4396 | 0.57444 | -2.5061 | 0.01221  | 0.17151  | 60.1221 | 88.0173 | 22.4052 | 23.4997 | 16.8385 | 22.547  | Down |
| Pld3      | 5724.09 | 0.50894 | 0.2475  | 2.05635 | 0.03975  | 0.35945  | 5752.01 | 4490.86 | 3931.62 | 6386.81 | 8749.09 | 5034.14 | Up   |
| 9530053A  | 583.414 | -0.707  | 0.33339 | -2.1208 | 0.03394  | 0.32502  | 686.969 | 849.515 | 634.164 | 380.082 | 274.369 | 675.387 | Down |
| Dil3      | 6.22382 | -5.0624 | 1.54235 | -3.2823 | 0.00103  | 0.03195  | 4.92804 | 16.8123 | 14.6121 | 0       | 0.9905  | 0       | Down |
| Acp7      | 40.9589 | -2.0885 | 0.72257 | -2.8904 | 0.00385  | 0.08043  | 34.4963 | 117.686 | 46.7587 | 7.15208 | 8.91451 | 30.746  | Down |
| Rinl      | 1147.03 | 0.48705 | 0.19572 | 2.48857 | 0.01283  | 0.17723  | 786.516 | 1003.79 | 1075.45 | 1299.63 | 1568.95 | 1147.85 | Up   |
| Lgals4    | 1059.92 | -0.4637 | 0.16412 | -2.8253 | 0.00472  | 0.09241  | 1144.29 | 1334.1  | 1207.93 | 794.902 | 835.983 | 1042.29 | Down |
| Ryr1      | 133.034 | 0.66545 | 0.27675 | 2.40452 | 0.01619  | 0.20878  | 111.374 | 103.841 | 93.5173 | 164.498 | 204.043 | 120.934 | Up   |
| C2300621  | 456.647 | 0.33991 | 0.17328 | 1.96161 | 0.04981  | 0.39986  | 417.898 | 345.146 | 446.155 | 553.775 | 466.526 | 510.383 | Up   |
| Zfp382    | 60.889  | 0.64474 | 0.29655 | 2.17416 | 0.02969  | 0.30007  | 51.2517 | 43.5142 | 47.7328 | 85.8249 | 68.3446 | 68.666  | Up   |
| Cox7a1    | 189.065 | -3.0299 | 0.52881 | -5.7297 | 1.01E-08 | 2.68E-06 | 209.935 | 589.419 | 211.388 | 23.4997 | 67.3541 | 32.7957 | Down |
| Tyrbop    | 1827.75 | 0.82674 | 0.31988 | 2.58455 | 0.00975  | 0.14899  | 1774.1  | 1276.74 | 903.026 | 2048.56 | 3260.73 | 1703.33 | Up   |
| Hspb6     | 1327.26 | -1.6736 | 0.38725 | -4.3217 | 1.55E-05 | 0.00119  | 1175.83 | 3503.88 | 1383.28 | 624.274 | 669.579 | 606.721 | Down |
| 22000021  | 1.79962 | -4.273  | 2.11239 | -2.0228 | 0.04309  | NA       | 1.97122 | 3.95583 | 4.87069 | 0       | 0       | 0       | Down |
| D7Ertdd12 | 18.2419 | 3.04888 | 0.75194 | 4.0547  | 5.02E-05 | 0.00317  | 6.89926 | 2.96687 | 1.94828 | 29.63   | 48.5345 | 19.4725 | Up   |
| Mag       | 121.686 | 0.84122 | 0.26314 | 3.19682 | 0.00139  | 0.03943  | 91.6616 | 95.9289 | 74.0345 | 145.085 | 190.176 | 133.233 | Up   |
| Fxyd5     | 4660.07 | 0.54721 | 0.10785 | 5.0736  | 3.90E-07 | 6.02E-05 | 3878.37 | 3674.97 | 3806.93 | 5693.05 | 5806.32 | 5100.76 | Up   |
| Fxyd1     | 2529.53 | -0.5082 | 0.14361 | -3.5387 | 0.0004   | 0.01608  | 2566.53 | 3339.71 | 3005.22 | 2094.54 | 2008.74 | 2162.47 | Down |
| Fxyd3     | 174.473 | -0.7589 | 0.21362 | -3.5525 | 0.00038  | 0.01549  | 219.791 | 249.217 | 188.983 | 121.585 | 124.803 | 142.456 | Down |
| Kctd15    | 944.179 | -0.5142 | 0.12367 | -4.1578 | 3.21E-05 | 0.00222  | 1182.73 | 1132.36 | 1017    | 776.511 | 776.553 | 779.923 | Down |
| Cebpa     | 7108.57 | 0.45774 | 0.18199 | 2.51523 | 0.0119   | 0.16878  | 7314.2  | 5290.93 | 5365.56 | 7788.61 | 7642.7  | 9249.41 | Up   |
| Rpl17-ps9 | 77.3818 | 0.57043 | 0.28363 | 2.01118 | 0.04431  | 0.37788  | 53.2229 | 76.1498 | 57.4742 | 101.151 | 88.1546 | 88.1385 | Up   |
| Plekhhf1  | 521.853 | -0.3806 | 0.17169 | -2.217  | 0.02662  | 0.28184  | 544.056 | 683.37  | 543.569 | 414.82  | 491.288 | 454.016 | Down |
| Zfp619    | 256.877 | -0.4821 | 0.18899 | -2.551  | 0.01074  | 0.15802  | 270.057 | 318.445 | 309.776 | 223.758 | 234.749 | 184.476 | Down |
| Gm37494   | 3059.97 | -0.5211 | 0.14009 | -3.7195 | 0.0002   | 0.00939  | 3433.86 | 3386.19 | 3999.81 | 2332.6  | 2421.77 | 2785.59 | Down |
| 4930435C  | 1.85287 | 4.35756 | 2.20802 | 1.97351 | 0.04844  | NA       | 0       | 0       | 0       | 6.13035 | 3.962   | 1.02487 | Up   |
| Vstm2b    | 62.0662 | -1.3527 | 0.44873 | -3.0145 | 0.00257  | 0.06015  | 81.8055 | 107.796 | 77.9311 | 36.7821 | 16.8385 | 51.2433 | Down |
| Zfp936    | 4.3967  | 4.58731 | 1.69556 | 2.70549 | 0.00682  | 0.11755  | 0       | 0       | 0.97414 | 3.06518 | 5.94301 | 16.3979 | Up   |
| Siglec7   | 488.725 | 1.05681 | 0.40892 | 2.58436 | 0.00976  | 0.14899  | 509.56  | 272.952 | 169.5   | 727.468 | 813.201 | 439.667 | Up   |
| Nkgf      | 554.176 | 1.02482 | 0.23201 | 4.41712 | 1.00E-05 | 0.00084  | 320.323 | 456.899 | 318.543 | 753.012 | 872.631 | 603.646 | Up   |
| Etfbl     | 118.043 | -0.8443 | 0.42055 | -2.0076 | 0.04469  | 0.37936  | 146.856 | 80.1056 | 227.948 | 80.7163 | 104.993 | 67.6411 | Down |
| Siglece   | 287.39  | 0.81934 | 0.37022 | 2.2131  | 0.02689  | 0.28339  | 261.186 | 210.648 | 151.966 | 352.495 | 534.87  | 213.172 | Up   |
| Klk8      | 621.474 | 0.61935 | 0.24037 | 2.5767  | 0.00997  | 0.15148  | 515.473 | 593.375 | 361.405 | 807.163 | 614.111 | 837.315 | Up   |
| Klk1b11   | 3.53898 | 4.2612  | 1.65942 | 2.56788 | 0.01023  | 0.15345  | 0       | 0       | 0.97414 | 10.173  | 5.94301 | 4.09946 | Up   |
| Klk1b22   | 450.898 | 12.2843 | 1.22123 | 10.0589 | 8.39E-24 | 1.17E-20 | 0       | 0       | 0       | 1189.29 | 936.023 | 580.074 | Up   |
| Klk1      | 61.6705 | -1.0949 | 0.50041 | -2.188  | 0.02867  | 0.29286  | 128.129 | 81.0946 | 42.8621 | 37.8038 | 53.487  | 26.6465 | Down |
| Shank1    | 80.6875 | -1.2322 | 0.40253 | -3.061  | 0.00221  | 0.05407  | 99.5465 | 91.9731 | 148.069 | 64.3687 | 52.4965 | 27.6714 | Down |
| 5430431A  | 121.223 | -1.7899 | 0.70187 | -2.5502 | 0.01076  | 0.15803  | 89.6904 | 398.55  | 75.9828 | 20.4345 | 82.2116 | 60.4671 | Down |
| Atf5      | 3640.62 | -0.4172 | 0.12046 | -3.4638 | 0.00053  | 0.01997  | 4291.34 | 4332.63 | 3866.36 | 3364.54 | 3085.41 | 2903.44 | Down |
| Il4i1     | 85.2213 | -1.2126 | 0.36719 | -3.3024 | 0.00096  | 0.03049  | 112.359 | 83.0725 | 161.707 | 48.0211 | 41.601  | 64.5665 | Down |
| Pnkp      | 1692.8  | 0.2851  | 0.1259  | 2.26455 | 0.02354  | 0.26285  | 1523.75 | 1663.43 | 1391.07 | 1862.61 | 1777.95 | 1938.02 | Up   |
| Cpt1c     | 466.388 | -0.6484 | 0.22266 | -2.9119 | 0.00359  | 0.07604  | 598.264 | 430.197 | 679.949 | 325.93  | 400.162 | 363.827 | Down |
| Gm15545   | 354.884 | -1.2916 | 0.38857 | -3.3241 | 0.00089  | 0.02894  | 523.358 | 235.372 | 753.009 | 193.106 | 202.062 | 222.396 | Down |
| Rps11     | 76.1125 | -1.1634 | 0.50355 | -2.3104 | 0.02087  | 0.24598  | 115.316 | 44.5031 | 155.862 | 62.3252 | 36.6485 | 42.0195 | Down |
| Rpl13a    | 759.647 | 0.34937 | 0.16481 | 2.11985 | 0.03402  | 0.32506  | 675.142 | 607.22  | 721.837 | 900.14  | 726.037 | 927.504 | Up   |
| Slc17a7   | 406.423 | -5.6495 | 1.85519 | -3.0452 | 0.00232  | 0.05622  | 390.301 | 1673.32 | 327.311 | 2.04345 | 45.563  | 0       | Down |
| Hrc       | 789.778 | -4.5927 | 1.57983 | -2.9071 | 0.00365  | 0.07708  | 951.112 | 2832.38 | 766.647 | 2.04345 | 178.29  | 8.19893 | Down |
| Snrnp70   | 9908.68 | -0.3098 | 0.11385 | -2.7214 | 0.0065   | 0.11421  | 10509.5 | 10537.3 | 11859.2 | 8564.1  | 9433.53 | 8548.41 | Down |
| Fut1      | 14.8108 | 2.21927 | 0.84176 | 2.63646 | 0.00838  | 0.13431  | 3.94243 | 5.93375 | 5.84483 | 18.3911 | 46.5535 | 8.19893 | Up   |
| Kcnj14    | 26.6252 | -3.1445 | 0.60683 | -5.1819 | 2.20E-07 | 3.76E-05 | 42.3812 | 51.4258 | 49.6811 | 10.2173 | 2.9715  | 3.0746  | Down |
| Kcnj11    | 215.794 | -2.8764 | 1.37045 | -2.0989 | 0.03583  | 0.33565  | 168.539 | 835.67  | 135.405 | 7.15208 | 135.699 | 12.2984 | Down |
| Abcc8     | 220.493 | -2.2775 | 1.03794 | -2.1943 | 0.02822  | 0.28987  | 190.222 | 756.553 | 150.017 | 19.4128 | 155.509 | 51.2433 | Down |
| Saa3      | 221.392 | 2.35556 | 0.45856 | 5.13682 | 2.79E-07 | 4.44E-05 | 97.5753 | 47.47   | 72.0863 | 469.994 | 482.374 | 158.854 | Up   |
| Mrgprb1   | 2.63364 | -4.8217 | 2.20803 | -2.1837 | 0.02898  | 0.29496  | 1.97122 | 12.8565 | 0.97414 | 0       | 0       | 0       | Down |
| Csrp3     | 2416.88 | -4.1041 | 1.46857 | -2.7946 | 0.0052   | 0.0986   | 2327.02 | 8675.14 | 2702.26 | 18.3911 | 750.8   | 27.6714 | Down |
| E2f8      | 96.6562 | 0.91963 | 0.27944 | 3.29102 | 0.001    | 0.03138  | 68.9926 | 70.216  | 61.3707 | 151.215 | 129.756 | 98.3871 | Up   |
| Nell1     | 22.7865 | -1.8168 | 0.83642 | -2.1721 | 0.02985  | 0.30087  | 14.7841 | 76.1498 | 15.5862 | 10.2173 | 14.8575 | 5.12433 | Down |
| Svip      | 1362.23 | -0.3757 | 0.14626 | -2.5686 | 0.01021  | 0.15335  | 1716.93 | 1553.65 | 1345.29 | 1115.72 | 1194.54 | 1247.26 | Down |
| Tubgcp5   | 1652.91 | 0.27945 | 0.13784 | 2.02738 | 0.04262  | 0.37265  | 1528.68 | 1606.07 | 1345.29 | 1954.56 | 1821.53 | 1661.31 | Up   |
| Gm34121   | 65.0844 | -0.9738 | 0.38396 | -2.5363 | 0.0112   | 0.1626   | 79.8343 | 107.796 | 71.1121 | 30.6518 | 39.62   | 61.492  | Down |
| A230057C  | 953.639 | -0.844  | 0.36876 | -2.2888 | 0.02209  | 0.25362  | 1581.9  | 1252.02 | 840.682 | 757.098 | 359.552 | 930.578 | Down |
| A330076F  | 265.681 | -0.8679 | 0.37276 | -2.3284 | 0.01989  | 0.23828  | 474.078 | 286.798 | 268.862 | 185.954 | 111.927 | 266.465 | Down |
| Gm32633   | 260.952 | -1.0537 | 0.51808 | -2.0339 | 0.04196  | 0.37014  | 427.754 | 302.621 | 326.336 | 45.9776 | 212.958 | 250.067 | Down |
| Gm45212   | 3.94828 | -2.7664 | 1.30958 | -2.1124 | 0.03465  | 0.32919  | 6.89926 | 7.91166 | 5.84483 | 2.04345 | 0.9905  | 0       | Down |
| Cers3     | 72.2583 | 0.89764 | 0.35196 | 2.55041 | 0.01076  | 0.15803  | 41.3956 | 60.3264 | 49.6811 | 83.7815 | 72.3066 | 126.059 | Up   |
| Fam169b   | 292.78  | 0.72873 | 0.21835 | 3.33738 | 0.00085  | 0.02793  | 254.287 | 240.317 | 166.578 | 345.343 | 385.305 | 364.852 | Up   |
| Fanci     | 35.8301 | 1.00012 | 0.43733 | 2.28686 | 0.0222   | 0.25464  | 25.6258 | 16.8123 | 29.2242 | 49.0428 | 59.4301 | 34.8454 | Up   |
| Ticrr     | 29.3537 | 1.49055 | 0.53532 | 2.78439 | 0.00536  | 0.10097  | 15.7697 | 19.7792 | 10.7155 | 37.8038 | 64.3826 | 27.6714 | Up   |
| Plin1     | 546.07  | -6.5244 | 0.93699 | -6.9631 | 3.33E-12 | 1.56E-09 | 532.229 | 2270.65 | 438.362 | 12.2607 | 18.8195 | 4.09946 | Down |
| Anpep     | 4973.87 | 0.34782 | 0.17571 | 1.97953 |          |          |         |         |         |         |         |         |      |

|          |         |         |         |         |          |          |         |         |         |         |         |         |      |
|----------|---------|---------|---------|---------|----------|----------|---------|---------|---------|---------|---------|---------|------|
| Adamtsl3 | 720.855 | -0.5925 | 0.17639 | -3.3592 | 0.00078  | 0.02626  | 823.969 | 960.278 | 816.328 | 645.73  | 601.234 | 477.587 | Down |
| Folh1    | 58.9685 | -1.084  | 0.45997 | -2.3567 | 0.01844  | 0.22623  | 81.8055 | 118.675 | 39.9397 | 39.8473 | 36.6485 | 36.8952 | Down |
| Ctsc     | 16144.9 | 0.58072 | 0.22963 | 2.52893 | 0.01144  | 0.16462  | 17349.7 | 9515.75 | 11950.7 | 19897.1 | 18897.8 | 19258.3 | Up   |
| Rps13-ps | 171.281 | 3.65306 | 0.27369 | 13.3475 | 1.22E-40 | 2.94E-37 | 24.6402 | 23.735  | 27.2759 | 314.691 | 269.416 | 367.927 | Up   |
| Prss23   | 4680.69 | 0.48274 | 0.19277 | 2.5042  | 0.01227  | 0.17177  | 3881.33 | 4367.24 | 3465.98 | 5994.46 | 6133.18 | 4241.92 | Up   |
| Me3      | 488.128 | -0.9667 | 0.3758  | -2.5723 | 0.0101   | 0.15245  | 479.006 | 1052.25 | 406.216 | 359.647 | 374.409 | 257.241 | Down |
| Syt12    | 1577.28 | -0.5055 | 0.22654 | -2.2315 | 0.02565  | 0.27683  | 1741.57 | 2077.8  | 1732.99 | 1203.59 | 1004.37 | 1703.33 | Down |
| Prpc     | 2889.72 | 0.45855 | 0.14378 | 3.1893  | 0.00143  | 0.0      | 2645.37 | 2295.37 | 2362.29 | 3458.54 | 3657.92 | 2918.82 | Up   |
| C230038L | 9.56923 | -1.6074 | 0.75814 | -2.1201 | 0.03399  | 0.32506  | 8.87048 | 16.8123 | 17.5345 | 4.0869  | 3.962   | 6.1492  | Down |
| Kctd21   | 1059.99 | 0.40379 | 0.15614 | 2.58602 | 0.00971  | 0.14849  | 968.853 | 774.354 | 994.595 | 1118.79 | 1252.98 | 1250.34 | Up   |
| Thrsp    | 1049.18 | -3.385  | 0.74223 | -4.5606 | 5.10E-06 | 0.00052  | 1175.83 | 3549.37 | 1019.92 | 315.713 | 131.737 | 102.487 | Down |
| Pak1     | 1610.57 | 0.21067 | 0.10742 | 1.96112 | 0.04986  | 0.39986  | 1496.15 | 1476.51 | 1506.99 | 1638.85 | 1834.41 | 1710.5  | Up   |
| Myo7a    | 1490.23 | 0.97081 | 0.29664 | 3.27263 | 0.00107  | 0.0325   | 1336.49 | 918.742 | 765.673 | 1646    | 2723.88 | 1550.62 | Up   |
| Lrrc32   | 4169.88 | 0.36042 | 0.15513 | 2.32336 | 0.02016  | 0.24026  | 3241.67 | 3392.13 | 4321.28 | 4455.74 | 4804.92 | 4803.55 | Up   |
| Uvrsg    | 3149.59 | 0.23886 | 0.11809 | 2.02276 | 0.0431   | 0.37332  | 3171.69 | 2707.77 | 2788.96 | 3446.28 | 3506.37 | 3276.5  | Up   |
| Dgat2    | 1783.27 | -1.1868 | 0.40159 | -2.9553 | 0.00312  | 0.06999  | 2264.93 | 4054.73 | 1114.41 | 904.227 | 1180.68 | 1180.65 | Down |
| Serpinh1 | 13429.1 | 0.44225 | 0.14988 | 2.95076 | 0.00317  | 0.07072  | 10808.2 | 9941.01 | 13411   | 15547.6 | 15368.6 | 15498   | Up   |
| Gm10605  | 82.3505 | -0.8454 | 0.38905 | -2.1729 | 0.02979  | 0.30054  | 130.1   | 88.0173 | 99.3621 | 71.5208 | 72.3066 | 32.7957 | Down |
| Chrd12   | 31.1459 | -2.3065 | 0.55471 | -4.158  | 3.21E-05 | 0.00222  | 41.3956 | 69.2271 | 44.8104 | 17.3693 | 7.92401 | 6.1492  | Down |
| Gm39059  | 6.90542 | -2.0489 | 1.02421 | -2.0005 | 0.04545  | 0.38155  | 9.85609 | 9.88958 | 13.6379 | 4.0869  | 3.962   | 0       | Down |
| Fchsd2   | 449.585 | 0.54518 | 0.17111 | 3.18605 | 0.00144  | 0.04024  | 419.869 | 330.312 | 346.793 | 515.971 | 583.405 | 501.159 | Up   |
| Art2a    | 44.0761 | 1.56196 | 0.62112 | 2.51477 | 0.01191  | 0.16878  | 27.597  | 25.7129 | 13.6379 | 41.8907 | 122.822 | 32.7957 | Up   |
| Inpp1    | 4024.2  | -0.2575 | 0.10569 | -2.4362 | 0.01484  | 0.19554  | 4491.42 | 4585.8  | 4069.95 | 3582.17 | 3635.14 | 3780.73 | Down |
| Folr2    | 121.818 | -1.1213 | 0.28145 | -3.984  | 6.78E-05 | 0.00397  | 147.841 | 207.681 | 145.147 | 78.6729 | 62.4016 | 89.1633 | Down |
| Il18bp   | 616.414 | 0.52789 | 0.23304 | 2.26522 | 0.0235   | 0.2628   | 516.459 | 507.335 | 490.966 | 689.665 | 950.881 | 543.179 | Up   |
| Art5     | 45.4571 | -1.5146 | 0.55075 | -2.7501 | 0.00596  | 0.10785  | 66.0358 | 106.807 | 29.2242 | 22.478  | 28.7245 | 19.4725 | Down |
| Pgap2    | 2434.07 | 0.43272 | 0.17953 | 2.4102  | 0.01594  | 0.20568  | 2300.41 | 1998.68 | 1916.13 | 2384.71 | 2634.73 | 3369.76 | Up   |
| Rhog     | 4422.99 | 0.3967  | 0.1215  | 3.26499 | 0.00109  | 0.0332   | 3728.56 | 3623.54 | 4104.05 | 4954.35 | 5442.8  | 4684.66 | Up   |
| Trim34a  | 610.265 | 2.03868 | 0.95999 | 2.12364 | 0.0337   | 0.32401  | 557.855 | 72.1939 | 86.6983 | 648.796 | 1466.93 | 829.116 | Up   |
| Trim5    | 441.377 | 2.40153 | 1.02991 | 2.3318  | 0.01971  | 0.23657  | 345.949 | 33.6246 | 41.888  | 599.753 | 987.529 | 639.516 | Up   |
| Trim30a  | 2365.37 | 0.62981 | 0.21847 | 2.8828  | 0.00394  | 0.082    | 2106.25 | 1835.51 | 1629.73 | 2668.75 | 3674.76 | 2277.25 | Up   |
| Gm5900   | 129.372 | -3.883  | 0.54353 | -7.144  | 9.07E-13 | 4.89E-10 | 165.582 | 284.82  | 276.655 | 4.0869  | 29.715  | 15.373  | Down |
| Dchs1    | 655.807 | 0.44934 | 0.18757 | 2.39564 | 0.01659  | 0.21213  | 648.531 | 447.009 | 567.923 | 816.359 | 746.838 | 708.182 | Up   |
| Gm4070   | 259.664 | 0.82398 | 0.40105 | 2.05455 | 0.03992  | 0.35982  | 186.28  | 206.692 | 169.5   | 243.171 | 558.642 | 193.7   | Up   |
| Gvin1    | 125.746 | 1.96887 | 0.6009  | 3.27655 | 0.00105  | 0.03233  | 72.935  | 49.4479 | 31.1724 | 82.7598 | 396.2   | 121.959 | Up   |
| Gm4759   | 50.3309 | -1.8883 | 0.93712 | -2.015  | 0.04391  | 0.3764   | 64.0646 | 83.0725 | 90.5949 | 57.2166 | 3.962   | 3.0746  | Down |
| Gm8995   | 1941.59 | 1.13256 | 0.29516 | 3.83707 | 0.00012  | 0.0064   | 1553.32 | 1136.31 | 959.526 | 2162.99 | 3788.67 | 2048.71 | Up   |
| Olfml1   | 770.309 | -0.5301 | 0.18165 | -2.9181 | 0.00352  | 0.07506  | 851.566 | 977.091 | 902.052 | 764.251 | 574.49  | 552.403 | Down |
| Cyb5r2   | 35.0552 | -2.0465 | 0.85645 | -2.3895 | 0.01687  | 0.21417  | 35.4819 | 95.9289 | 37.9914 | 8.1738  | 30.7055 | 2.04973 | Down |
| Lyve1    | 18494.8 | 0.64099 | 0.27464 | 2.33394 | 0.0196   | 0.236    | 14804.8 | 12197.8 | 16354.8 | 28618.5 | 25027   | 13965.8 | Up   |
| 2310014F | 418.811 | -0.5752 | 0.16468 | -3.4926 | 0.00048  | 0.01831  | 478.02  | 507.335 | 518.242 | 384.169 | 326.865 | 298.236 | Down |
| Arntl    | 1044.29 | -1.2301 | 0.47178 | -2.6073 | 0.00913  | 0.14228  | 439.581 | 1977.92 | 1975.55 | 529.254 | 713.161 | 630.293 | Down |
| Rras2    | 5002.09 | -0.4674 | 0.16849 | -2.7743 | 0.00553  | 0.10361  | 4759.5  | 6162.2  | 6494.58 | 4318.83 | 4501.83 | 3775.61 | Down |
| Calca    | 177.274 | -1.5546 | 0.23873 | -6.512  | 7.42E-11 | 2.91E-08 | 305.539 | 258.118 | 229.897 | 103.194 | 93.1071 | 73.7903 | Down |
| Sox6     | 550.441 | -0.6469 | 0.18724 | -3.455  | 0.00055  | 0.02049  | 642.617 | 728.862 | 643.906 | 388.256 | 378.371 | 520.632 | Down |
| Plekha7  | 952.443 | -0.9835 | 0.16358 | -6.0123 | 1.83E-09 | 6.02E-07 | 1268.48 | 1418.17 | 1108.57 | 578.297 | 631.94  | 709.207 | Down |
| Rps13    | 9965.86 | 0.66386 | 0.20602 | 3.22237 | 0.00127  | 0.03687  | 7590.17 | 6771.4  | 8776.01 | 12802.2 | 9317.64 | 14537.7 | Up   |
| Gm44777  | 55.3814 | 0.7686  | 0.33048 | 2.32572 | 0.02003  | 0.23902  | 37.4531 | 48.4589 | 37.0173 | 79.6946 | 73.2971 | 56.3676 | Up   |
| Nucb2    | 2625.46 | 0.28359 | 0.12675 | 2.23736 | 0.02526  | 0.27483  | 2652.27 | 2257.79 | 2194.73 | 2794.42 | 2938.82 | 2914.72 | Up   |
| Xylt1    | 283.104 | 0.64892 | 0.24575 | 2.64061 | 0.00828  | 0.13297  | 221.762 | 223.505 | 216.259 | 382.125 | 411.058 | 243.918 | Up   |
| Arl6ip1  | 13877.3 | 0.79238 | 0.13534 | 5.85497 | 4.77E-09 | 1.34E-06 | 10200.1 | 8923.37 | 11354.6 | 17457.2 | 18505.5 | 16823.2 | Up   |
| Syt17    | 411.561 | -1.6518 | 0.19543 | -8.4522 | 2.86E-17 | 2.81E-14 | 680.07  | 650.734 | 542.595 | 182.889 | 234.749 | 178.327 | Down |
| Gm44652  | 36.4105 | -0.7942 | 0.39787 | -1.9962 | 0.04592  | 0.38348  | 33.5107 | 55.3817 | 49.6811 | 25.5431 | 28.7245 | 25.6216 | Down |
| Coq7     | 1412.27 | -0.8904 | 0.23938 | -3.7195 | 0.0002   | 0.00939  | 1693.28 | 2210.32 | 1600.51 | 934.879 | 760.705 | 1273.91 | Down |
| Tmc7     | 420.469 | -0.6981 | 0.32552 | -2.1444 | 0.032    | 0.31324  | 404.1   | 682.381 | 474.405 | 262.583 | 461.573 | 237.769 | Down |
| Tmc5     | 658.468 | -1.0935 | 0.44812 | -2.4401 | 0.01468  | 0.19381  | 852.552 | 1395.42 | 442.259 | 337.169 | 649.769 | 273.639 | Down |
| Iqcc     | 826.515 | -0.9097 | 0.3395  | -2.6796 | 0.00737  | 0.1232   | 1080.23 | 1123.46 | 1032.59 | 562.971 | 304.084 | 855.763 | Down |
| Gprc5b   | 1928.02 | -0.9004 | 0.27879 | -3.2299 | 0.00124  | 0.03619  | 3560.02 | 2149.99 | 1822.61 | 1401.81 | 1099.46 | 1534.22 | Down |
| Gpr139   | 1.68363 | 4.2195  | 2.11605 | 1.99405 | 0.04615  | NA       | 0       | 0       | 0       | 3.06518 | 3.962   | 3.0746  | Up   |
| Acsn5    | 55.1725 | -2.0332 | 0.50722 | -4.0086 | 6.11E-05 | 0.00367  | 103.489 | 118.675 | 43.8362 | 24.5214 | 13.867  | 26.6465 | Down |
| Gm39078  | 3.10636 | -5.0606 | 2.01079 | -2.5167 | 0.01185  | 0.1683   | 9.85609 | 0.98896 | 7.79311 | 0       | 0       | 0       | Down |
| Acsn1    | 567.403 | -0.8188 | 0.29576 | -2.7686 | 0.00563  | 0.10469  | 660.358 | 870.283 | 641.957 | 516.993 | 251.587 | 463.239 | Down |
| Rexo5    | 516.347 | 0.39741 | 0.16681 | 2.38248 | 0.0172   | 0.21691  | 478.02  | 449.976 | 409.138 | 604.861 | 648.778 | 507.309 | Up   |
| Abca15   | 10.6477 | -6.8376 | 1.36599 | -5.0056 | 5.57E-07 | 8.29E-05 | 20.6978 | 21.7571 | 21.431  | 0       | 0       | 0       | Down |
| Cog7     | 3385.58 | -0.259  | 0.12966 | -1.9974 | 0.04578  | 0.38275  | 3387.54 | 4114.07 | 3564.37 | 3226.61 | 3107.2  | 2913.69 | Down |
| Ubfd1    | 2768.41 | 0.26462 | 0.09549 | 2.77125 | 0.00558  | 0.10441  | 2455.15 | 2515.91 | 2574.65 | 2904.77 | 3085.41 | 3074.6  | Up   |
| Ndufab1  | 2176.4  | -0.4147 | 0.18176 | -2.2818 | 0.0225   | 0.25626  | 2105.26 | 2933.25 | 2422.68 | 1908.58 | 1621.45 | 2067.15 | Down |
| Dctn5    | 737.005 | 0.71355 | 0.16394 | 4.35256 | 1.35E-05 | 0.00105  | 483.934 | 574.585 | 616.63  | 910.357 | 1005.36 | 831.166 | Up   |
| Ern2     | 22.4053 | -3.4765 | 1.061   | -3.2766 | 0.00105  | 0.03233  | 7.88487 | 100.874 | 14.6121 | 2.04345 | 5.94301 | 3.0746  | Down |
| Kdm8     | 333.548 | 0.90388 | 0.18542 | 4.87485 | 1.09E-06 | 0.00014  | 261.186 | 220.538 | 215.285 | 486.341 | 381.343 | 436.593 | Up   |
| Il21r    | 384.452 | 0.77026 | 0.27262 | 2.82536 | 0.00472  | 0.09241  | 320.323 | 289.765 | 242.561 | 554.797 | 577.462 | 321.808 | Up   |
| 1700123J | 12.7091 | -2.5437 | 1.09868 | -2.3152 | 0.0206   | 0.24365  | 15.7697 | 40.5473 | 8.76725 | 0       | 2.9715  | 8.19893 | Down |
| Lat      | 885.189 | 0.69824 | 0.15646 | 4.46275 | 8.09E-06 | 0.00073  | 592.351 | 701.171 | 731.578 | 1109.59 | 985.548 | 1190.89 | Up   |
| Il27     | 50.4262 | 0.8075  | 0.39874 | 2.02513 | 0.04285  | 0.37291  | 30.5539 | 39.5583 | 39.9397 | 60.2818 | 88.1546 | 44.0692 | Up   |
| Nupr1    | 6718.82 | -0.4424 | 0.21172 | -2.0897 | 0.03665  | 0.3402   | 6471.51 | 8985.67 | 7765.83 | 5474.4  | 4588    | 7027.51 | Down |
| Coro1a   | 6080.08 | 0.4907  | 0.18245 | 2.68952 | 0.00716  | 0.1211   | 5556.86 | 5150.49 | 4460.58 | 7102.01 | 8397.47 | 5813.04 | Up   |
| Gdpd3    | 1012.44 | -4.023  | 0.16466 | -24.431 | #####    | #####    | 2071.75 | 1748.48 | 1902.49 | 123.629 | 125.794 | 102.487 | Down |
| Gm9967   | 12.7034 | -1.5639 | 0.66244 |         |          |          |         |         |         |         |         |         |      |

|           |         |         |         |         |          |          |         |         |         |         |         |         |      |
|-----------|---------|---------|---------|---------|----------|----------|---------|---------|---------|---------|---------|---------|------|
| Stx1b     | 296.199 | -1.1037 | 0.2998  | -3.6815 | 0.00023  | 0.0105   | 346.934 | 507.335 | 358.483 | 163.476 | 140.651 | 260.316 | Down |
| Pycard    | 357.673 | 0.71558 | 0.15988 | 4.4756  | 7.62E-06 | 0.0007   | 287.798 | 283.831 | 240.612 | 460.798 | 418.982 | 454.016 | Up   |
| Trim72    | 165.189 | -3.4173 | 1.11707 | -3.0592 | 0.00222  | 0.05418  | 161.64  | 616.121 | 128.586 | 8.1738  | 66.3636 | 10.2487 | Down |
| Itgax     | 3106.33 | 1.51159 | 0.44278 | 3.41385 | 0.00064  | 0.02294  | 2525.13 | 1290.59 | 1023.82 | 4172.73 | 7320.79 | 2304.92 | Up   |
| 9130023H  | 354.435 | 0.80412 | 0.1807  | 4.44992 | 8.59E-06 | 0.00075  | 244.431 | 263.063 | 266.914 | 383.147 | 456.621 | 512.433 | Up   |
| Rgs10     | 987.208 | 0.9871  | 0.15812 | 6.24277 | 4.30E-10 | 1.55E-07 | 733.293 | 601.287 | 651.699 | 1186.22 | 1476.84 | 1273.91 | Up   |
| Gm32816   | 3.69363 | 2.70425 | 1.25296 | 2.1583  | 0.0309   | 0.30734  | 0.98561 | 0.98896 | 0.97414 | 6.13035 | 6.93351 | 6.1492  | Up   |
| Gm40457   | 26.9769 | -6.312  | 1.36858 | -4.6121 | 3.99E-06 | 0.00041  | 27.597  | 116.697 | 15.5862 | 0       | 1.981   | 0       | Down |
| Bag3      | 4736.34 | -0.2461 | 0.11671 | -2.1091 | 0.03494  | 0.33048  | 4793.02 | 5615.3  | 5009.99 | 4172.73 | 4524.61 | 4302.39 | Down |
| Plpp4     | 14.1112 | 3.09557 | 0.99313 | 3.117   | 0.00183  | 0.04755  | 5.91365 | 2.96687 | 0       | 37.8038 | 27.734  | 10.2487 | Up   |
| Gm39094   | 1221.26 | 2.81358 | 0.17    | 16.5507 | 1.58E-61 | 5.69E-58 | 320.323 | 247.24  | 344.845 | 2006.67 | 2140.47 | 2268.03 | Up   |
| Fgfr2     | 12958.4 | 0.4091  | 0.16756 | 2.4415  | 0.01463  | 0.19354  | 11884.5 | 10762.8 | 10752.5 | 17806.6 | 12616   | 13927.9 | Up   |
| Mki67     | 760.728 | 1.47244 | 0.33495 | 4.39603 | 1.10E-05 | 0.0009   | 373.546 | 508.324 | 327.311 | 1466.18 | 1264.87 | 624.143 | Up   |
| Gm9347    | 24.3029 | -5.1316 | 0.94259 | -5.4442 | 5.20E-08 | 1.11E-05 | 69.9782 | 46.481  | 25.3276 | 0       | 1.981   | 2.04973 | Down |
| Ebf3      | 14.546  | -2.4865 | 1.11103 | -2.238  | 0.02522  | 0.27466  | 9.85609 | 58.3485 | 5.84483 | 9.19553 | 1.981   | 2.04973 | Down |
| Tcerg1l   | 44.2695 | -1.1942 | 0.44868 | -2.6616 | 0.00778  | 0.1277   | 45.338  | 81.0946 | 58.4483 | 16.3476 | 34.6675 | 29.7211 | Down |
| Bnip3     | 658.672 | -0.2341 | 0.11828 | -1.9791 | 0.04781  | 0.39195  | 718.509 | 719.961 | 697.483 | 588.514 | 597.272 | 630.293 | Down |
| Dpysl4    | 21.5338 | -5.9812 | 1.31959 | -4.5326 | 5.83E-06 | 0.00057  | 25.6258 | 84.0614 | 17.5345 | 0       | 1.981   | 0       | Down |
| Stk32c    | 378.869 | -1.1864 | 0.48722 | -2.4351 | 0.01489  | 0.19589  | 379.459 | 562.717 | 637.087 | 429.125 | 165.414 | 99.412  | Down |
| Lrrc2     | 479.072 | -0.5372 | 0.16983 | -3.1633 | 0.00156  | 0.04258  | 492.804 | 650.734 | 558.181 | 389.277 | 371.438 | 411.996 | Down |
| Nkx6-2    | 54.8955 | -1.697  | 0.46762 | -3.6291 | 0.00028  | 0.01236  | 81.8055 | 97.9068 | 72.0863 | 11.239  | 37.639  | 28.6962 | Down |
| Adgra1    | 14.2197 | -2.0822 | 0.95711 | -2.1755 | 0.02959  | 0.29945  | 15.7697 | 41.5362 | 11.6897 | 2.04345 | 1.981   | 12.2984 | Down |
| Adam8     | 2789.01 | -0.9154 | 0.46365 | -1.9744 | 0.04833  | 0.39416  | 2468.95 | 6300.65 | 2166.48 | 1715.48 | 3000.23 | 1082.26 | Down |
| Msx3      | 2.63005 | -4.8197 | 1.9947  | -2.4163 | 0.01568  | 0.20282  | 3.94243 | 9.88958 | 1.94828 | 0       | 0       | 0       | Down |
| 5830411N  | 97.5687 | 1.01823 | 0.46486 | 2.19043 | 0.02849  | 0.29175  | 81.8055 | 45.4921 | 66.2414 | 97.0639 | 216.92  | 77.8898 | Up   |
| Cox8b     | 106.759 | -3.124  | 0.62825 | -4.9725 | 6.61E-07 | 9.58E-05 | 108.417 | 362.948 | 103.259 | 10.2173 | 18.8195 | 36.8952 | Down |
| Nlrp6     | 21.1998 | 1.15771 | 0.58904 | 1.96543 | 0.04937  | 0.39822  | 8.87048 | 21.7571 | 8.76725 | 28.6083 | 36.6485 | 22.547  | Up   |
| Ifitm3    | 16253.2 | 0.28086 | 0.10476 | 2.68086 | 0.00734  | 0.1232   | 13949.3 | 14197.5 | 15881.4 | 18106   | 17391.2 | 17993.6 | Up   |
| Gm45299   | 5.59128 | -3.9539 | 1.42383 | -2.777  | 0.00549  | 0.10304  | 8.87048 | 14.8344 | 7.79311 | 0       | 0       | 2.04973 | Down |
| Gm45889   | 5.41996 | -3.2979 | 1.47196 | -2.2405 | 0.02506  | 0.27344  | 4.92804 | 17.8012 | 6.81897 | 0       | 2.9715  | 0       | Down |
| Lsp1      | 3717.59 | 0.45019 | 0.19128 | 2.35357 | 0.01859  | 0.22746  | 3471.31 | 3224    | 2731.48 | 4254.46 | 5139.71 | 3484.54 | Up   |
| Tnfrsf26  | 244.88  | 0.95384 | 0.36556 | 2.60925 | 0.00907  | 0.14179  | 205.007 | 140.432 | 154.888 | 274.844 | 494.26  | 199.849 | Up   |
| Retn      | 180.679 | -4.242  | 0.60079 | -7.0606 | 1.66E-12 | 8.13E-10 | 151.784 | 600.298 | 277.629 | 6.13035 | 27.734  | 20.4973 | Down |
| Mcemp1    | 967.102 | 1.15793 | 0.4321  | 2.67975 | 0.00737  | 0.1232   | 967.868 | 512.28  | 315.621 | 1297.59 | 1904.73 | 804.52  | Up   |
| Cd209d    | 60.8483 | -1.7038 | 0.43581 | -3.9095 | 9.25E-05 | 0.00507  | 70.9638 | 128.565 | 79.8794 | 29.63   | 38.6295 | 17.4227 | Down |
| Cd209b    | 136.928 | -1.2421 | 0.32799 | -3.7872 | 0.00015  | 0.00751  | 133.057 | 271.963 | 172.423 | 82.7598 | 75.2781 | 86.0887 | Down |
| Cd209f    | 294.277 | -1.9866 | 0.37455 | -5.3038 | 1.13E-07 | 2.08E-05 | 420.855 | 662.602 | 326.336 | 128.737 | 70.3256 | 156.804 | Down |
| Cd209g    | 108.347 | -1.9462 | 0.41628 | -4.6753 | 2.94E-06 | 0.00032  | 153.755 | 258.118 | 104.233 | 43.9342 | 33.677  | 56.3676 | Down |
| Shcbp1    | 76.3913 | 1.38442 | 0.44961 | 3.07915 | 0.00208  | 0.05192  | 37.4531 | 58.3485 | 31.1724 | 147.128 | 124.803 | 59.4422 | Up   |
| Gm5605    | 3.18084 | 5.1381  | 1.85083 | 2.77611 | 0.0055   | 0.10317  | 0       | 0       | 0       | 3.06518 | 10.8955 | 5.12433 | Up   |
| Myo16     | 66.7779 | -1.1588 | 0.53846 | -2.1521 | 0.03139  | 0.3102   | 38.4387 | 101.863 | 136.379 | 38.8256 | 26.7435 | 58.4174 | Down |
| Rab20     | 741.253 | 0.32095 | 0.15863 | 2.02332 | 0.04304  | 0.37324  | 723.437 | 610.187 | 643.906 | 762.207 | 935.033 | 772.749 | Up   |
| F7        | 1248.09 | 1.46073 | 0.45693 | 3.19684 | 0.00139  | 0.03943  | 961.954 | 596.342 | 437.388 | 1889.17 | 2857.59 | 746.102 | Up   |
| F10       | 515.531 | 1.54799 | 0.46502 | 3.32886 | 0.00087  | 0.02862  | 303.567 | 299.654 | 185.086 | 787.75  | 1231.19 | 285.938 | Up   |
| Adprhl1   | 213.012 | -3.8891 | 1.24244 | -3.1302 | 0.00175  | 0.04609  | 148.827 | 865.338 | 183.138 | 4.0869  | 64.3826 | 12.2984 | Down |
| Cfap97d2  | 443.826 | -0.7837 | 0.30651 | -2.5567 | 0.01057  | 0.15671  | 510.545 | 715.017 | 458.819 | 341.256 | 210.977 | 426.344 | Down |
| Myom2     | 1046.01 | -3.6423 | 1.19644 | -3.0443 | 0.00233  | 0.05634  | 1428.15 | 3636.4  | 746.19  | 23.4997 | 381.343 | 60.4671 | Down |
| Gm20796   | 42.8599 | -1.5054 | 0.52122 | -2.8883 | 0.00387  | 0.08082  | 58.1509 | 97.9068 | 34.0948 | 27.5866 | 15.848  | 23.5719 | Down |
| Ckap2     | 194.03  | 1.75051 | 0.35143 | 4.98116 | 6.32E-07 | 9.22E-05 | 100.532 | 106.807 | 59.4225 | 398.473 | 300.122 | 198.824 | Up   |
| Slc20a2   | 2097.56 | -0.5928 | 0.22001 | -2.6944 | 0.00705  | 0.12008  | 2212.69 | 3326.85 | 2028.16 | 1531.57 | 1757.15 | 1728.95 | Down |
| Ank1      | 89.0859 | -2.4866 | 0.57797 | -4.3022 | 1.69E-05 | 0.00128  | 93.6328 | 293.721 | 66.2414 | 23.4997 | 28.7245 | 28.6962 | Down |
| Ido1      | 183.178 | 0.98661 | 0.4749  | 2.0775  | 0.03775  | 0.34709  | 94.6184 | 152.3   | 121.767 | 161.433 | 438.792 | 130.158 | Up   |
| Htra4     | 174.664 | -0.725  | 0.26046 | -2.7835 | 0.00538  | 0.10115  | 182.338 | 272.952 | 197.75  | 125.672 | 155.509 | 113.76  | Down |
| Adrb3     | 1083.68 | -0.6968 | 0.23882 | -2.9178 | 0.00352  | 0.07506  | 1166.96 | 1493.33 | 1360.87 | 778.555 | 618.073 | 1084.31 | Down |
| Gm26795   | 2.95588 | -4.9884 | 1.97345 | -2.5277 | 0.01148  | 0.16493  | 1.97122 | 11.8675 | 3.89655 | 0       | 0       | 0       | Down |
| Nrg1      | 877.519 | -0.532  | 0.23376 | -2.2759 | 0.02285  | 0.25839  | 938.3   | 1025.55 | 1148.51 | 769.359 | 507.136 | 876.26  | Down |
| Ppp1r3b   | 588.4   | -0.5675 | 0.26789 | -2.1185 | 0.03414  | 0.32547  | 725.408 | 869.294 | 513.371 | 356.582 | 564.585 | 501.159 | Down |
| Gm19410   | 14.644  | -3.3146 | 1.17237 | -2.8273 | 0.00469  | 0.09231  | 7.88487 | 58.3485 | 13.6379 | 0       | 5.94301 | 2.04973 | Down |
| Zdhhc2    | 440.253 | 0.44822 | 0.17787 | 2.52    | 0.01174  | 0.16717  | 427.754 | 375.804 | 313.673 | 534.362 | 475.44  | 514.483 | Up   |
| Gm45660   | 6.23471 | -6.0652 | 1.52854 | -3.968  | 7.25E-05 | 0.00416  | 15.7697 | 13.8454 | 7.79311 | 0       | 0       | 0       | Down |
| Asah1     | 13316.2 | 0.25682 | 0.12713 | 2.0202  | 0.04336  | 0.37382  | 13293.9 | 11569.8 | 11538.7 | 15170.6 | 15150.7 | 13173.6 | Up   |
| F11       | 94.5395 | -0.8855 | 0.41458 | -2.136  | 0.03268  | 0.31749  | 99.5465 | 98.8958 | 169.5   | 88.8901 | 37.639  | 72.7655 | Down |
| Sorbs2    | 1401.77 | -1.491  | 0.44059 | -3.3841 | 0.00071  | 0.02463  | 1135.42 | 3753.1  | 1315.09 | 592.601 | 641.845 | 972.598 | Down |
| Snx25     | 8398.19 | 0.32216 | 0.14613 | 2.20456 | 0.02749  | 0.28689  | 8666.46 | 6576.57 | 7150.18 | 9596.04 | 9498.9  | 8900.96 | Up   |
| Slc25a4   | 14295.8 | -0.9784 | 0.27642 | -3.5395 | 0.0004   | 0.01606  | 15089.7 | 27961.8 | 13845.4 | 9228.22 | 9303.77 | 10346   | Down |
| Enpp6     | 93.987  | -1.132  | 0.57071 | -1.9835 | 0.04731  | 0.38996  | 61.1077 | 248.228 | 77.9311 | 38.8256 | 74.2876 | 63.5417 | Down |
| 9330121K  | 3.38614 | 3.22206 | 1.56069 | 2.06452 | 0.03897  | 0.35477  | 0       | 0.98896 | 0.97414 | 8.1738  | 1.981   | 8.19893 | Up   |
| Hand2os1  | 95.532  | -2.7291 | 0.62166 | -4.39   | 1.13E-05 | 0.00092  | 146.856 | 237.35  | 113.974 | 10.2173 | 52.4965 | 12.2984 | Down |
| 5033428I2 | 3.61424 | -3.2706 | 1.6174  | -2.0222 | 0.04316  | 0.37341  | 2.95683 | 7.91166 | 8.76725 | 0       | 0       | 2.04973 | Down |
| Hmgb2     | 2442.76 | 0.39053 | 0.12603 | 3.09884 | 0.00194  | 0.04965  | 2180.17 | 2136.15 | 2026.21 | 2924.18 | 2921.98 | 2467.88 | Up   |
| Galtnt6   | 110.383 | -1.7844 | 0.71333 | -2.5016 | 0.01236  | 0.17237  | 69.9782 | 395.583 | 47.7328 | 56.1949 | 42.5915 | 50.2184 | Down |
| BC030500  | 28.8643 | -1.7217 | 0.85823 | -2.0061 | 0.04484  | 0.38016  | 16.7553 | 81.0946 | 35.069  | 2.04345 | 20.8005 | 17.4227 | Down |
| Palld     | 5927.38 | -0.5591 | 0.22897 | -2.4416 | 0.01462  | 0.19354  | 5059.13 | 8455.59 | 7670.37 | 5195.47 | 5172.4  | 4011.33 | Down |
| Tll1      | 244.456 | 0.74659 | 0.28844 | 2.5884  | 0.00964  | 0.14778  | 242.46  | 154.277 | 150.991 | 389.277 | 269.416 | 260.316 | Up   |
| Cpe       | 2538.25 | -0.9334 | 0.34577 | -2.6996 | 0.00694  | 0.11869  | 2793.22 | 5249.39 | 1953.15 | 1679.72 | 2073.12 | 1480.93 | Down |
| Psd3      | 3344.28 | -0.2764 | 0.13718 | -2.0151 | 0.04389  | 0.3764   | 3292.92 | 4064.62 | 3633.54 | 3278.72 | 2916.03 | 2879.87 | Down |
| Csgalnact | 1608.13 | 0.32879 | 0.13312 | 2.46982 | 0.01352  | 0.18348  | 1293.12 | 1440.91 | 1543.04 | 1741.02 | 1932.47 | 1698.2  | Up   |
| Cilp2     | 145.684 | -3.6267 | 0.64009 | -5.6658 | 1.46E-08 | 3.72E-06 | 148.827 |         |         |         |         |         |      |





|           |         |         |         |         |          |          |         |         |         |         |         |         |      |
|-----------|---------|---------|---------|---------|----------|----------|---------|---------|---------|---------|---------|---------|------|
| Cacna2d2  | 36.6793 | -2.4807 | 0.88017 | -2.8184 | 0.00483  | 0.09356  | 24.6402 | 149.333 | 12.6638 | 12.2607 | 9.90501 | 11.2735 | Down |
| Slc38a3   | 99.4233 | -3.9661 | 0.89041 | -4.4543 | 8.42E-06 | 0.00075  | 155.726 | 310.533 | 94.4914 | 2.04345 | 31.696  | 2.04973 | Down |
| 48334451C | 36.678  | 0.82021 | 0.38245 | 2.14465 | 0.03198  | 0.31321  | 23.6546 | 26.7019 | 29.2242 | 36.7821 | 53.487  | 50.2184 | Up   |
| Uqcrc1    | 7703.16 | -0.4118 | 0.20783 | -1.9815 | 0.04753  | 0.39072  | 7488.66 | 11484.8 | 7412.22 | 6464.46 | 6276.8  | 7092.07 | Down |
| Pfkfb4    | 3405.19 | 0.47007 | 0.16411 | 2.86441 | 0.00418  | 0.08511  | 3066.23 | 2848.2  | 2651.61 | 3759.95 | 4681.11 | 3424.08 | Up   |
| Shisa5    | 16256.2 | 0.3261  | 0.11655 | 2.79803 | 0.00514  | 0.09791  | 15062.1 | 13675.3 | 14542.9 | 18155   | 19532.7 | 16569   | Up   |
| Fbxw26    | 25.8343 | -3.029  | 1.22268 | -2.4774 | 0.01324  | 0.18081  | 32.5251 | 91.9731 | 13.6379 | 1.02173 | 15.848  | 0       | Down |
| Mir6236   | 378.372 | 2.02124 | 0.97796 | 2.06679 | 0.03875  | 0.35327  | 137     | 194.825 | 116.897 | 1450.85 | 157.49  | 213.172 | Up   |
| Ngp       | 157.813 | 1.35575 | 0.44396 | 3.05377 | 0.00226  | 0.05483  | 103.489 | 124.609 | 37.9914 | 178.802 | 301.112 | 200.874 | Up   |
| Lrrc2     | 336.808 | -2.3687 | 0.59392 | -3.9882 | 6.66E-05 | 0.00393  | 295.683 | 1139.28 | 258.147 | 92.977  | 175.319 | 59.4422 | Down |
| Susd5     | 34.1831 | -1.9298 | 0.62164 | -3.1044 | 0.00191  | 0.04907  | 26.6114 | 92.9621 | 42.8621 | 12.2607 | 9.90501 | 20.4973 | Down |
| Osbpl10   | 803.217 | -0.3054 | 0.1322  | -2.3101 | 0.02088  | 0.24603  | 908.731 | 890.062 | 865.035 | 645.73  | 764.667 | 745.077 | Down |
| Eomes     | 101.278 | 0.67391 | 0.31528 | 2.13753 | 0.03255  | 0.31668  | 75.8919 | 98.8958 | 59.4225 | 112.39  | 155.509 | 105.561 | Up   |
| Itga9     | 1961.12 | 0.78279 | 0.27201 | 2.87781 | 0.004    | 0.08279  | 1516.85 | 1427.07 | 1381.33 | 3607.71 | 1838.37 | 1995.41 | Up   |
| Scn5a     | 1916.86 | -1.5714 | 0.42713 | -3.679  | 0.00023  | 0.01058  | 2232.4  | 3918.25 | 2454.83 | 746.881 | 482.374 | 1666.43 | Down |
| Scn10a    | 45.3797 | -3.725  | 0.66422 | -5.6081 | 2.05E-08 | 4.86E-06 | 68.007  | 136.476 | 48.7069 | 2.04345 | 10.8955 | 6.1492  | Down |
| Ccr8      | 31.4926 | 1.6266  | 0.60425 | 2.69196 | 0.0071   | 0.12048  | 22.669  | 13.8454 | 9.74139 | 37.8038 | 78.2496 | 26.6465 | Up   |
| Gm47050   | 14.285  | 1.65859 | 0.8321  | 1.99327 | 0.04623  | 0.38473  | 8.87048 | 4.94479 | 6.81897 | 9.19553 | 43.582  | 12.2984 | Up   |
| Gm39458   | 11.4162 | 3.40793 | 1.52723 | 2.23145 | 0.02565  | 0.27683  | 4.92804 | 0       | 0.97414 | 4.0869  | 56.4585 | 2.04973 | Up   |
| Zfp651    | 1424.24 | -0.3325 | 0.14814 | -2.2442 | 0.02482  | 0.27245  | 1731.71 | 1668.37 | 1362.82 | 1212.79 | 1228.22 | 1341.55 | Down |
| Klhl40    | 11.1792 | -3.9648 | 1.20788 | -3.2825 | 0.00103  | 0.03195  | 5.91365 | 42.5252 | 14.6121 | 2.04345 | 1.981   | 0       | Down |
| Hhatl     | 663.426 | -1.0794 | 0.47353 | -2.2795 | 0.02264  | 0.25704  | 541.099 | 1243.12 | 917.639 | 373.951 | 183.243 | 721.506 | Down |
| Zkscan7   | 117.909 | -0.562  | 0.25339 | -2.2182 | 0.02654  | 0.28168  | 167.553 | 125.598 | 128.586 | 88.8901 | 87.1641 | 109.661 | Down |
| Clec3b    | 2865.91 | -0.6836 | 0.21107 | -3.2387 | 0.0012   | 0.03538  | 2955.84 | 3854.96 | 3786.48 | 2780.11 | 1877.99 | 1940.07 | Down |
| Slc6a20a  | 349.427 | 1.1127  | 0.23802 | 4.67484 | 2.94E-06 | 0.00032  | 247.388 | 240.317 | 175.345 | 428.103 | 590.339 | 415.071 | Up   |
| Xcr1      | 237.646 | 1.01444 | 0.36729 | 2.76198 | 0.00575  | 0.10587  | 184.309 | 165.156 | 122.741 | 223.758 | 496.241 | 233.669 | Up   |
| Ccr1      | 594.087 | 0.73791 | 0.34354 | 2.14799 | 0.03171  | 0.31185  | 660.358 | 376.793 | 299.061 | 778.555 | 928.099 | 521.657 | Up   |
| Ccr2      | 1970.44 | 0.70788 | 0.23354 | 3.03111 | 0.00244  | 0.05803  | 1417.31 | 1811.77 | 1260.54 | 2173.21 | 3142.86 | 2016.94 | Up   |
| Ccr5      | 491.02  | 1.3004  | 0.37351 | 3.48156 | 0.0005   | 0.01892  | 277.942 | 264.052 | 308.802 | 666.165 | 1078.66 | 350.504 | Up   |
| Plekhhg1  | 1705.46 | 0.41255 | 0.20316 | 2.03064 | 0.04229  | 0.37149  | 1543.46 | 1362.78 | 1483.61 | 2099.65 | 2292.02 | 1451.21 | Up   |
| Syne1     | 7380.88 | -0.2781 | 0.11236 | -2.4747 | 0.01333  | 0.18166  | 7392.07 | 8181.65 | 8696.13 | 6472.63 | 6758.19 | 6784.61 | Down |
| Gm21321   | 9.96508 | -6.7424 | 1.45637 | -4.6296 | 3.66E-06 | 0.00039  | 13.7985 | 13.8454 | 32.1466 | 0       | 0       | 0       | Down |
| Ubp1      | 326.323 | 0.77131 | 0.2916  | 2.64513 | 0.00817  | 0.13205  | 273.999 | 217.571 | 231.845 | 383.147 | 569.538 | 281.838 | Up   |
| Zc3h12d   | 267.423 | 0.59544 | 0.2751  | 2.16442 | 0.03043  | 0.30453  | 258.229 | 190.869 | 189.957 | 391.321 | 347.666 | 226.495 | Up   |
| Gm48727   | 29.3623 | 0.95528 | 0.42872 | 2.22822 | 0.02587  | 0.27824  | 16.7553 | 22.746  | 20.4569 | 42.9125 | 43.582  | 29.7211 | Up   |
| Samd5     | 1093.84 | 0.32736 | 0.14345 | 2.28209 | 0.02248  | 0.25623  | 983.638 | 862.371 | 1064.73 | 1309.85 | 1192.56 | 1149.9  | Up   |
| Rab32     | 1105.81 | 0.95764 | 0.36002 | 2.65992 | 0.00782  | 0.12796  | 917.602 | 788.2   | 549.414 | 1300.66 | 2236.55 | 842.44  | Up   |
| Grm1      | 36.5888 | -4.2213 | 1.06052 | -3.9805 | 6.88E-05 | 0.00401  | 15.7697 | 175.046 | 17.5345 | 7.15208 | 1.981   | 2.04973 | Down |
| B230208H  | 179.02  | -0.5131 | 0.25064 | -2.0472 | 0.04063  | 0.36257  | 179.381 | 211.637 | 240.612 | 114.433 | 174.328 | 153.73  | Down |
| Stx11     | 1406.7  | 0.25275 | 0.12723 | 1.98655 | 0.04697  | 0.38829  | 1230.04 | 1303.45 | 1318.01 | 1456.98 | 1691.78 | 1439.94 | Up   |
| Adat2     | 202.027 | -1.2108 | 0.23274 | -5.2022 | 1.97E-07 | 3.46E-05 | 274.985 | 231.416 | 339.974 | 122.607 | 109.946 | 133.233 | Down |
| Gm47712   | 15.4911 | -2.3615 | 0.75743 | -3.1178 | 0.00182  | 0.04752  | 25.6258 | 38.5694 | 13.6379 | 6.13035 | 6.93351 | 2.04973 | Down |
| Cited2    | 3919.2  | 0.25611 | 0.10212 | 2.508   | 0.01214  | 0.17104  | 3439.77 | 3577.06 | 3699.78 | 4167.62 | 4118.5  | 4512.48 | Up   |
| Txlnb     | 791.032 | -3.2364 | 0.91765 | -3.5269 | 0.00042  | 0.01654  | 897.89  | 2934.24 | 458.819 | 92.977  | 281.302 | 80.9644 | Down |
| Gm48483   | 4.26708 | -5.5182 | 1.85728 | -2.9711 | 0.00297  | 0.06689  | 1.97122 | 16.8123 | 6.81897 | 0       | 0       | 0       | Down |
| Tnfrap3   | 1406.54 | 0.50657 | 0.24727 | 2.04868 | 0.04049  | 0.3624   | 1219.2  | 1133.35 | 1133.9  | 1607.17 | 2201.88 | 1143.75 | Up   |
| Ahi1      | 897.162 | -0.3625 | 0.16446 | -2.2043 | 0.0275   | 0.28689  | 938.3   | 969.179 | 1120.26 | 756.077 | 698.303 | 900.857 | Down |
| 1700021A  | 5.71434 | 0.40369 | 1.4316  | 2.81949 | 0.00481  | 0.09349  | 0       | 1.97792 | 0       | 13.2824 | 12.8765 | 6.1492  | Up   |
| Raet1e    | 9.72761 | 2.48282 | 0.85455 | 2.9054  | 0.00367  | 0.07734  | 4.92804 | 2.96687 | 0.97414 | 11.239  | 19.81   | 18.4476 | Up   |
| Vnn1      | 1198.03 | 0.82989 | 0.35398 | 2.34446 | 0.01905  | 0.23143  | 1406.46 | 575.574 | 605.914 | 1376.26 | 1396.61 | 1827.34 | Up   |
| Enpp3     | 89.711  | -0.593  | 0.28214 | -2.102  | 0.03555  | 0.33412  | 113.345 | 126.587 | 83.7759 | 77.6511 | 71.3161 | 65.5914 | Down |
| Gm36172   | 8.89533 | 1.81711 | 0.92009 | 1.97493 | 0.04828  | 0.394    | 7.88487 | 0.98896 | 2.92242 | 10.2173 | 11.886  | 19.4725 | Up   |
| Tmem200   | 407.746 | -0.5178 | 0.21638 | -2.3929 | 0.01672  | 0.21274  | 403.114 | 501.402 | 535.776 | 336.148 | 272.388 | 397.648 | Down |
| Samd3     | 125.691 | 0.62271 | 0.31554 | 1.97344 | 0.04844  | 0.39463  | 75.8919 | 128.565 | 92.5432 | 124.65  | 194.138 | 138.357 | Up   |
| Themis    | 68.3323 | 1.12816 | 0.35118 | 3.21245 | 0.00132  | 0.03769  | 37.4531 | 42.5252 | 48.7069 | 121.585 | 93.1071 | 66.6163 | Up   |
| Soga3     | 1.96198 | -4.3977 | 2.07594 | -2.1184 | 0.03414  | NA       | 1.97122 | 3.95583 | 5.84483 | 0       | 0       | 0       | Down |
| Nkain2    | 50.8712 | 1.20051 | 0.4509  | 2.66248 | 0.00776  | 0.12767  | 38.4387 | 36.5914 | 17.5345 | 50.0645 | 69.3351 | 93.2628 | Up   |
| Trdn      | 932.449 | -3.5586 | 1.12483 | -3.1637 | 0.00156  | 0.04258  | 1019.12 | 3303.12 | 834.837 | 32.6952 | 351.628 | 53.293  | Down |
| Gm48018   | 37.4765 | -1.7829 | 0.53654 | -3.3229 | 0.00089  | 0.02901  | 44.3524 | 86.0394 | 43.8362 | 9.19553 | 16.8385 | 24.5968 | Down |
| Calhm6    | 61.8129 | 1.61087 | 0.52599 | 3.06256 | 0.00219  | 0.05391  | 20.6978 | 45.4921 | 25.3276 | 62.3252 | 154.518 | 62.5168 | Up   |
| Frk       | 598.058 | 0.44216 | 0.19217 | 2.30087 | 0.0214   | 0.24952  | 552.926 | 538.982 | 429.595 | 613.035 | 811.22  | 642.591 | Up   |
| Amd2      | 114.657 | -1.0732 | 0.26963 | -3.9804 | 6.88E-05 | 0.00401  | 136.014 | 133.509 | 196.776 | 73.5642 | 74.2876 | 73.7903 | Down |
| Lama4     | 4621.46 | -0.3384 | 0.16266 | -2.0801 | 0.03751  | 0.34545  | 4485.51 | 5288.95 | 5708.45 | 4222.79 | 4506.78 | 3516.31 | Down |
| Mfsd4b5   | 147.649 | -0.9606 | 0.48163 | -1.9945 | 0.0461   | 0.38407  | 196.136 | 214.604 | 174.371 | 130.194 | 35.658  | 161.929 | Down |
| Ddo       | 2268.4  | -0.8075 | 0.33441 | -2.4147 | 0.01575  | 0.20351  | 2542.87 | 2985.66 | 3132.83 | 1578.57 | 895.413 | 2475.05 | Down |
| Cdc40     | 2284.87 | 0.28836 | 0.14436 | 1.99747 | 0.04577  | 0.38275  | 2317.17 | 1891.88 | 1962.89 | 2523.66 | 2718.92 | 2294.67 | Up   |
| Wasf1     | 178.827 | -0.6187 | 0.21515 | -2.8758 | 0.00403  | 0.08303  | 180.366 | 252.184 | 217.233 | 142.02  | 137.68  | 143.481 | Down |
| Qrs1      | 784.143 | -0.371  | 0.14241 | -2.6054 | 0.00918  | 0.14264  | 800.314 | 982.035 | 870.88  | 683.534 | 652.74  | 715.356 | Down |
| Speer5-ps | 3.42701 | -5.2026 | 1.83577 | -2.834  | 0.0046   | 0.09132  | 3.94243 | 3.95583 | 12.6638 | 0       | 0       | 0       | Down |
| Bves      | 223.691 | -2.6339 | 0.5986  | -4.4001 | 1.08E-05 | 0.00089  | 242.46  | 700.182 | 213.336 | 20.4345 | 97.0691 | 68.666  | Down |
| Ascc3     | 1860.88 | 0.27813 | 0.12254 | 2.26977 | 0.02322  | 0.26122  | 1571.06 | 1719.8  | 1755.4  | 2082.28 | 2161.27 | 1875.5  | Up   |
| Ros1      | 129.535 | 2.05999 | 0.33279 | 6.19016 | 6.01E-10 | 2.13E-07 | 52.2373 | 42.5252 | 55.5259 | 230.91  | 135.699 | 260.316 | Up   |
| Hsf2      | 1305.15 | -0.3044 | 0.12035 | -2.5289 | 0.01144  | 0.16462  | 1405.48 | 1421.13 | 1500.17 | 1190.31 | 1072.71 | 1241.11 | Down |
| Smpdl3a   | 10153.2 | 0.26788 | 0.13381 | 2.00187 | 0.0453   | 0.38132  | 10271   | 9171.6  | 8197.38 | 10408.3 | 11636.4 | 11234.6 | Up   |
| Sowahc    | 2670.54 | 0.32772 | 0.15515 | 2.11224 | 0.03467  | 0.32919  | 2638.47 | 2262.74 | 2204.48 | 2785.22 | 3411.28 | 2721.02 | Up   |
| P4ha1     | 7587.85 | 0.31687 | 0.15696 | 2.01881 | 0.04351  | 0.37421  | 6575.98 | 6071.21 | 7626.53 | 8731.66 | 9220.57 | 7301.14 | Up   |
| Oit3      | 48.9903 | -0.8189 | 0.34144 | -2.3984 | 0.01647  | 0.21109  | 54.2085 | 58.3485 | 75.0087 | 32.6952 | 32.6865 | 40.9946 | Down |
| Pald1     | 3834.01 | 0.3289  | 0.166   |         |          |          |         |         |         |         |         |         |      |

|           |         |         |         |         |          |          |         |         |         |         |         |         |      |
|-----------|---------|---------|---------|---------|----------|----------|---------|---------|---------|---------|---------|---------|------|
| Zfp365    | 1414.74 | 0.4899  | 0.19869 | 2.46562 | 0.01368  | 0.18518  | 1284.25 | 958.3   | 1287.81 | 1973.97 | 1457.03 | 1527.05 | Up   |
| Cdk1      | 344.082 | 1.37643 | 0.3535  | 3.89378 | 9.87E-05 | 0.00534  | 175.438 | 276.908 | 121.767 | 639.6   | 498.222 | 352.554 | Up   |
| A330049N  | 22.2359 | 4.70443 | 1.10372 | 4.26235 | 2.02E-05 | 0.00148  | 0       | 4.94479 | 0       | 32.6952 | 75.2781 | 20.4973 | Up   |
| Pcdh15    | 23.2172 | 1.65894 | 0.68245 | 2.43087 | 0.01506  | 0.19718  | 16.7553 | 12.8565 | 3.89655 | 33.7169 | 19.81   | 52.2682 | Up   |
| Specc1l   | 8660.76 | -0.2602 | 0.0928  | -2.8034 | 0.00506  | 0.09677  | 9062.67 | 9772.88 | 9483.24 | 7833.57 | 8135.97 | 7676.25 | Down |
| Ggt5      | 775.149 | 0.50203 | 0.1845  | 2.72096 | 0.00651  | 0.11428  | 754.976 | 518.214 | 651.699 | 848.032 | 962.767 | 915.205 | Up   |
| Derl3     | 192.765 | 1.52306 | 0.43795 | 3.47774 | 0.00051  | 0.01912  | 124.187 | 66.2602 | 108.129 | 271.779 | 442.754 | 143.481 | Up   |
| Itgb2     | 5440.66 | 1.17516 | 0.42658 | 2.75486 | 0.00587  | 0.10674  | 4518.03 | 3131.04 | 2370.08 | 6543.13 | 12599.2 | 3482.49 | Up   |
| Gm18119   | 3.95678 | -2.7686 | 1.32524 | -2.0891 | 0.0367   | 0.3402   | 5.91365 | 11.8675 | 2.92242 | 1.02173 | 0.9905  | 1.02487 | Down |
| Gatd3a    | 1920.7  | -0.5242 | 0.19693 | -2.662  | 0.00777  | 0.12767  | 2116.1  | 2852.16 | 1829.43 | 1483.55 | 1615.51 | 1627.49 | Down |
| Gm47015   | 253.604 | 1.93344 | 0.25902 | 7.46448 | 8.36E-14 | 5.31E-11 | 99.5465 | 128.565 | 87.6725 | 316.735 | 486.336 | 402.772 | Up   |
| Prtn3     | 58.0118 | -0.785  | 0.36631 | -2.1431 | 0.0321   | 0.31414  | 92.6472 | 61.3154 | 66.2414 | 54.1514 | 31.696  | 42.0195 | Down |
| Cfd       | 1150.85 | -5.1203 | 0.94151 | -5.4384 | 5.38E-08 | 1.14E-05 | 1494.18 | 3414.87 | 1803.13 | 13.2824 | 139.661 | 39.9698 | Down |
| Cirbp     | 3479.08 | -0.4292 | 0.14904 | -2.8797 | 0.00398  | 0.08243  | 3730.53 | 4070.55 | 4177.11 | 2958.92 | 2560.44 | 3376.93 | Down |
| Apc2      | 171.838 | -0.5992 | 0.2268  | -2.642  | 0.00824  | 0.13272  | 163.611 | 232.405 | 225.026 | 133.846 | 134.708 | 141.431 | Down |
| Mob3a     | 2477.78 | 0.31377 | 0.13933 | 2.252   | 0.02432  | 0.26894  | 2241.27 | 2112.41 | 2274.61 | 2676.92 | 3116.12 | 2445.33 | Up   |
| Lingo3    | 7.05124 | -4.3272 | 1.49722 | -2.8901 | 0.00385  | 0.08043  | 3.94243 | 22.746  | 13.6379 | 0       | 1.981   | 0       | Down |
| Tmprss9   | 14.3872 | -1.4299 | 0.62943 | -2.2718 | 0.0231   | 0.26032  | 21.6834 | 21.7571 | 19.4828 | 11.239  | 3.962   | 8.19893 | Down |
| Gng7      | 234.839 | -0.4195 | 0.19604 | -2.1401 | 0.03235  | 0.3155   | 277.942 | 285.809 | 242.561 | 218.649 | 213.948 | 170.128 | Down |
| Atcayos   | 19.2935 | -2.6153 | 0.91468 | -2.8592 | 0.00425  | 0.08595  | 10.8417 | 66.2602 | 22.4052 | 2.04345 | 3.962   | 1.02487 | Down |
| Gna15     | 326.47  | 0.70113 | 0.33249 | 2.10874 | 0.03497  | 0.3306   | 279.913 | 230.427 | 235.742 | 343.3   | 610.149 | 259.291 | Up   |
| Nuak1     | 1491.57 | -0.3472 | 0.15728 | -2.2073 | 0.02729  | 0.2859   | 1465.6  | 1761.33 | 1783.65 | 1349.7  | 1438.21 | 1150.92 | Down |
| Ascl1     | 96.8496 | -1.4991 | 0.55899 | -2.6818 | 0.00732  | 0.12303  | 110.388 | 211.637 | 107.155 | 43.9342 | 18.8195 | 89.1633 | Down |
| Parppb    | 39.8747 | 1.13861 | 0.44326 | 2.56869 | 0.01021  | 0.15335  | 22.669  | 30.6577 | 21.431  | 62.3252 | 68.3446 | 33.8206 | Up   |
| Dram1     | 20079.4 | 0.35607 | 0.16243 | 2.19215 | 0.02837  | 0.29075  | 20738.2 | 14633.6 | 17470.2 | 21614.6 | 22438.8 | 23581.1 | Up   |
| Slc5a8    | 73.0976 | -7.1746 | 1.76357 | -4.0682 | 4.74E-05 | 0.00302  | 12.8129 | 389.649 | 33.1207 | 1.02173 | 1.981   | 0       | Down |
| Ano4      | 26.1542 | -3.3373 | 0.84965 | -3.9278 | 8.57E-05 | 0.00476  | 31.5395 | 80.1056 | 31.1724 | 0       | 6.93351 | 7.17406 | Down |
| Gas2l3    | 131.681 | 1.15534 | 0.35141 | 3.28775 | 0.00101  | 0.03165  | 88.7048 | 85.0504 | 71.1121 | 185.954 | 249.606 | 109.661 | Up   |
| Gm20757   | 3.11082 | -5.0625 | 1.89296 | -2.6744 | 0.00749  | 0.12437  | 1.97122 | 8.90062 | 7.79311 | 0       | 0       | 0       | Down |
| Gm29684   | 41.143  | 1.26003 | 0.5434  | 2.31879 | 0.02041  | 0.24213  | 17.741  | 29.6687 | 25.3276 | 62.3252 | 86.1736 | 25.6216 | Up   |
| Nudt4     | 14111.9 | -0.6403 | 0.25334 | -2.5274 | 0.01149  | 0.16493  | 13634.9 | 24229.5 | 13714.9 | 10730.2 | 10113   | 12249.2 | Down |
| Dcn       | 9443.73 | -0.9611 | 0.23925 | -4.0173 | 5.89E-05 | 0.00359  | 13496.9 | 15018.3 | 8919.21 | 5986.29 | 7757.6  | 5484.06 | Down |
| Lum       | 803.469 | -1.8539 | 0.38213 | -4.8515 | 1.23E-06 | 0.00015  | 947.17  | 2018.46 | 810.483 | 456.711 | 244.654 | 343.33  | Down |
| Mgat4c    | 15.5889 | 1.41037 | 0.63622 | 2.21679 | 0.02664  | 0.28184  | 8.87048 | 8.90062 | 7.79311 | 14.3042 | 18.8195 | 34.8454 | Up   |
| Nts       | 34.4219 | -1.9857 | 0.71936 | -2.7604 | 0.00577  | 0.10589  | 12.8129 | 71.205  | 80.8535 | 16.3476 | 8.91451 | 16.3979 | Down |
| Rpl6l     | 1550.01 | 0.30783 | 0.14502 | 2.12272 | 0.03378  | 0.32409  | 1417.31 | 1508.16 | 1230.34 | 1643.96 | 1613.53 | 1886.78 | Up   |
| Nap1l1    | 16571.5 | -0.2045 | 0.09673 | -2.1136 | 0.03455  | 0.32867  | 17651.3 | 17613.3 | 17967   | 15347.3 | 16312.6 | 14537.7 | Down |
| Gm5176    | 51.3768 | -0.9129 | 0.37386 | -2.4419 | 0.01461  | 0.19354  | 74.9063 | 55.3817 | 71.1121 | 29.63   | 48.5345 | 28.6962 | Down |
| Caps2     | 172.095 | -0.6947 | 0.3483  | -1.9947 | 0.04608  | 0.38407  | 191.208 | 248.228 | 198.724 | 115.455 | 83.2021 | 195.749 | Down |
| Lyz2      | 360085  | 0.80726 | 0.26714 | 3.02189 | 0.00251  | 0.05935  | 372732  | 199073  | 213870  | 487610  | 504413  | 382814  | Up   |
| Gm48903   | 28.8374 | -2.2306 | 0.60465 | -3.689  | 0.00023  | 0.10126  | 22.669  | 74.1719 | 45.7845 | 12.2607 | 8.91451 | 9.22379 | Down |
| Ppm1h     | 1589.92 | 0.28543 | 0.10828 | 2.6359  | 0.00839  | 0.13443  | 1390.69 | 1502.23 | 1406.66 | 1716.5  | 1832.43 | 1691.03 | Up   |
| Slc26a10  | 298.454 | -0.9566 | 0.27334 | -3.4998 | 0.00047  | 0.01799  | 261.186 | 458.877 | 461.742 | 181.867 | 215.929 | 211.122 | Down |
| Arhgap9   | 1195.27 | 0.64968 | 0.19839 | 3.27472 | 0.00106  | 0.03241  | 1011.23 | 974.124 | 806.587 | 1380.35 | 1784.88 | 1214.47 | Up   |
| Gpr182    | 3752.97 | 0.6313  | 0.21013 | 3.00432 | 0.00266  | 0.06165  | 3266.31 | 2247.9  | 3319.86 | 5360.99 | 4347.31 | 3975.45 | Up   |
| Atp5b     | 37164.3 | -0.451  | 0.19993 | -2.2556 | 0.0241   | 0.26729  | 38011   | 55480.5 | 35286.2 | 30381   | 31066.1 | 32760.9 | Down |
| Gls2      | 112.784 | 0.54318 | 0.27103 | 2.0041  | 0.04506  | 0.38066  | 98.5609 | 103.841 | 73.0604 | 110.346 | 152.537 | 138.357 | Up   |
| Stat2     | 3399.91 | 0.46882 | 0.2366  | 1.98151 | 0.04753  | 0.39072  | 2763.65 | 3002.48 | 2790.91 | 3791.62 | 5244.7  | 2806.08 | Up   |
| Cs        | 10290.7 | -0.3884 | 0.18314 | -2.1206 | 0.03395  | 0.32502  | 10509.5 | 14645.5 | 9847.57 | 8882.88 | 8790.7  | 9068.01 | Down |
| Coq10a    | 2232.23 | -0.3821 | 0.18661 | -2.0475 | 0.04061  | 0.36253  | 2256.06 | 3157.74 | 2164.54 | 1863.63 | 1904.73 | 2046.66 | Down |
| Ikzf4     | 221.768 | -0.6616 | 0.23616 | -2.8014 | 0.00509  | 0.09724  | 205.007 | 284.82  | 325.362 | 172.672 | 164.423 | 178.327 | Down |
| Tespa1    | 224.914 | 0.69608 | 0.27726 | 2.51059 | 0.01205  | 0.17012  | 198.107 | 158.233 | 158.785 | 283.018 | 355.59  | 195.749 | Up   |
| Sfi1      | 3778.56 | -0.3678 | 0.11584 | -3.1175 | 0.0015   | 0.04132  | 3838.95 | 4487.89 | 4445.97 | 3261.35 | 3362.75 | 3274.45 | Down |
| Inpp5j    | 59.1891 | -2.6252 | 0.58222 | -4.5089 | 6.52E-06 | 0.00063  | 75.8919 | 183.946 | 45.7845 | 17.3693 | 18.8195 | 13.3233 | Down |
| Osbp2     | 103.5   | -1.924  | 0.42695 | -4.5063 | 6.60E-06 | 0.00063  | 120.244 | 267.019 | 104.233 | 43.9342 | 44.5725 | 40.9946 | Down |
| Mtfrp1    | 464.861 | -0.544  | 0.25392 | -2.1426 | 0.03215  | 0.31414  | 493.79  | 748.641 | 412.061 | 360.669 | 377.381 | 396.623 | Down |
| Tbcl1d10a | 2898.89 | 0.23948 | 0.1167  | 2.05199 | 0.04017  | 0.36086  | 2856.29 | 2554.48 | 2565.88 | 3076.42 | 3354.83 | 2985.43 | Up   |
| Lif       | 293.868 | -0.66   | 0.22065 | -2.9911 | 0.00278  | 0.06352  | 280.898 | 396.572 | 402.319 | 205.367 | 222.863 | 255.192 | Down |
| Ascc2     | 5552.4  | 0.40813 | 0.17384 | 2.34769 | 0.01889  | 0.23008  | 4524.93 | 4781.61 | 5009.99 | 5918.86 | 5356.63 | 7722.36 | Up   |
| Zmat5     | 726.426 | 0.43748 | 0.20543 | 2.12952 | 0.03321  | 0.32161  | 646.559 | 563.706 | 640.983 | 642.923 | 649.769 | 1014.62 | Up   |
| Nf2       | 5307.97 | -0.2542 | 0.10799 | -2.3539 | 0.01858  | 0.22743  | 5550.95 | 5836.83 | 5935.43 | 5072.87 | 4980.24 | 4471.49 | Down |
| Nipsnap1  | 1036.11 | -0.7958 | 0.17892 | -4.4476 | 8.68E-06 | 0.00075  | 1383.79 | 1265.87 | 1294.63 | 815.337 | 600.244 | 856.788 | Down |
| Dbnl      | 5230.6  | 0.28055 | 0.12191 | 2.3012  | 0.02138  | 0.24952  | 4994.08 | 4519.54 | 4657.36 | 5232.26 | 6242.14 | 5738.22 | Up   |
| Pgam2     | 1127.28 | -2.5373 | 0.51599 | -4.9173 | 8.77E-07 | 0.00012  | 1060.51 | 3662.11 | 1047.2  | 272.801 | 516.051 | 204.973 | Down |
| Myl7      | 7501.85 | -4.2139 | 1.32908 | -3.1705 | 0.00152  | 0.04188  | 9151.38 | 24001   | 9557.27 | 34.7387 | 2076.09 | 190.625 | Down |
| Camk2b    | 4800.94 | 3.42945 | 1.31911 | 2.59981 | 0.00933  | 0.14418  | 1473.49 | 907.864 | 65.2673 | 7236.88 | 17807.2 | 1314.9  | Up   |
| Ogdh      | 15889.5 | -0.3723 | 0.14883 | -2.5016 | 0.01236  | 0.17237  | 16558.2 | 21083.6 | 16143.4 | 13310   | 14379.1 | 13862.3 | Down |
| Myo1g     | 2074.32 | 0.76115 | 0.28931 | 2.63088 | 0.00852  | 0.13583  | 1615.41 | 1680.24 | 1322.88 | 2465.42 | 3696.55 | 1665.41 | Up   |
| Igfbp3    | 7161.18 | -0.518  | 0.23022 | -2.25   | 0.02445  | 0.26955  | 7980.47 | 6410.43 | 10908.4 | 6895.62 | 5234.8  | 5537.35 | Down |
| Sun3      | 10.8836 | -1.8521 | 0.84567 | -2.1901 | 0.02851  | 0.29183  | 31.5395 | 7.91166 | 11.6897 | 5.10863 | 4.9525  | 4.09946 | Down |
| Upp1      | 1255.76 | 0.50426 | 0.20856 | 2.41781 | 0.01561  | 0.20227  | 894.933 | 875.228 | 1345.29 | 1560.17 | 1460    | 1398.94 | Up   |
| Spata48   | 53.6201 | -0.8024 | 0.36441 | -2.202  | 0.02766  | 0.28707  | 53.2229 | 85.0504 | 66.2414 | 42.9125 | 44.5725 | 29.7211 | Down |
| Ikzf1     | 1732.48 | 0.50119 | 0.22323 | 2.24521 | 0.02475  | 0.27233  | 1470.53 | 1457.72 | 1375.48 | 2039.36 | 2585.21 | 1466.58 | Up   |
| Figl1     | 124.858 | 0.97253 | 0.40733 | 2.38755 | 0.01696  | 0.21493  | 108.417 | 89.0062 | 55.5259 | 187.997 | 214.939 | 93.2628 | Up   |
| Ddc       | 186.645 | -0.9044 | 0.33299 | -2.7159 | 0.00661  | 0.11532  | 184.309 | 325.367 | 220.155 | 157.346 | 87.1641 | 145.531 | Down |
| Vstm2a    | 131.15  | 1.02713 | 0.52057 | 1.97307 | 0.04849  | 0.39468  | 140.942 | 82.0835 | 36.0431 | 175.737 | 249.606 | 102.487 | Up   |
| Plek      | 3730.08 | 0.93153 | 0.3026  | 3.07845 | 0.00208  | 0.05192  | 2900.65 | 2721.61 | 2075.89 | 4376.05 | 7141.51 | 3164.79 | Up   |
| Etaa1os   | 16.3343 | -1.1606 |         |         |          |          |         |         |         |         |         |         |      |

|           |         |         |         |         |          |          |         |         |         |         |         |         |      |
|-----------|---------|---------|---------|---------|----------|----------|---------|---------|---------|---------|---------|---------|------|
| 1700093K  | 11.3742 | -1.8049 | 0.70967 | -2.5433 | 0.01098  | 0.16054  | 23.6546 | 11.8675 | 17.5345 | 4.0869  | 4.9525  | 6.1492  | Down |
| Acyp2     | 1020.01 | -0.3917 | 0.17092 | -2.2917 | 0.02192  | 0.2525   | 1033.9  | 1346.96 | 1092.01 | 984.943 | 799.334 | 862.937 | Down |
| Il9r      | 179.186 | 1.29163 | 0.47132 | 2.74047 | 0.00614  | 0.10967  | 166.568 | 73.1829 | 72.0863 | 302.431 | 334.789 | 126.059 | Up   |
| Hba-a2    | 3310.89 | -2.1366 | 1.00834 | -2.1189 | 0.03409  | 0.32547  | 8528.47 | 3544.43 | 4111.84 | 161.433 | 774.572 | 2744.59 | Down |
| Dock2     | 1843.07 | 0.6532  | 0.30041 | 2.17437 | 0.02968  | 0.30007  | 1703.13 | 1386.52 | 1208.91 | 2271.3  | 3111.16 | 1377.42 | Up   |
| Hmmr      | 120.768 | 1.69231 | 0.46493 | 3.63994 | 0.00027  | 0.01195  | 61.1077 | 70.216  | 39.9397 | 256.453 | 215.929 | 80.9644 | Up   |
| Adra1b    | 153.714 | -2.0472 | 0.39627 | -5.1661 | 2.39E-07 | 3.94E-05 | 231.618 | 365.914 | 145.147 | 56.1949 | 76.2686 | 47.1438 | Down |
| Il12b     | 53.441  | 1.76955 | 0.64412 | 2.74724 | 0.00601  | 0.10824  | 30.5539 | 19.7792 | 22.4052 | 81.738  | 143.623 | 22.547  | Up   |
| Ebf1      | 1041.02 | -0.4124 | 0.19132 | -2.1554 | 0.03113  | 0.30867  | 1079.24 | 1375.64 | 1111.49 | 1070.77 | 828.059 | 780.948 | Down |
| Nipal4    | 16.9521 | -2.1049 | 0.78021 | -2.6979 | 0.00698  | 0.11922  | 11.8273 | 38.5694 | 32.1466 | 9.19553 | 7.92401 | 2.04973 | Down |
| Cyfp2     | 2728.95 | -0.5119 | 0.20695 | -2.4736 | 0.01338  | 0.18201  | 3066.23 | 3842.1  | 2715.9  | 1930.04 | 2082.03 | 2737.42 | Down |
| Itk       | 492.148 | 0.68956 | 0.26377 | 2.61425 | 0.00894  | 0.14065  | 405.085 | 282.842 | 442.259 | 648.796 | 726.037 | 447.866 | Up   |
| Havcr2    | 531.431 | 1.16095 | 0.41905 | 2.77043 | 0.0056   | 0.10454  | 475.063 | 252.184 | 258.147 | 585.449 | 1196.53 | 421.22  | Up   |
| Timd2     | 8.71539 | 4.06499 | 1.17569 | 3.45754 | 0.00055  | 0.02037  | 0       | 1.97792 | 0.97414 | 17.3693 | 23.772  | 8.19893 | Up   |
| Irgm1     | 3312.91 | 0.72916 | 0.26935 | 2.7071  | 0.00679  | 0.11716  | 2692.68 | 2454.59 | 2332.09 | 3780.38 | 5831.08 | 2786.61 | Up   |
| Gfpt2     | 1118.26 | -0.5788 | 0.29178 | -1.9838 | 0.04728  | 0.38984  | 1153.16 | 1494.32 | 1371.59 | 742.794 | 1315.39 | 632.342 | Down |
| Gm26542   | 122.66  | -0.7749 | 0.38204 | -2.0282 | 0.04254  | 0.3722   | 123.201 | 146.366 | 194.828 | 115.455 | 49.525  | 106.586 | Down |
| Cdkn2aipr | 2826.39 | 0.23337 | 0.10233 | 2.28059 | 0.02257  | 0.25683  | 2682.83 | 2515.91 | 2596.08 | 3225.59 | 2987.35 | 2950.59 | Up   |
| Olfr1372- | 306.051 | 1.1936  | 0.32316 | 3.69347 | 0.00022  | 0.01012  | 282.87  | 135.487 | 140.276 | 481.233 | 410.067 | 386.374 | Up   |
| Fstl4     | 153.676 | -1.5257 | 0.27403 | -5.5679 | 2.58E-08 | 5.92E-06 | 179.381 | 288.776 | 216.259 | 68.4556 | 86.1736 | 83.0141 | Down |
| Irf1      | 6834.36 | 0.39605 | 0.15167 | 2.61124 | 0.00902  | 0.14115  | 5722.44 | 5405.64 | 6578.36 | 7151.06 | 8866.96 | 7281.67 | Up   |
| Pdlim4    | 271.386 | -1.1623 | 0.32584 | -3.567  | 0.00036  | 0.01481  | 323.28  | 552.828 | 249.379 | 146.107 | 175.319 | 181.401 | Down |
| Csf2      | 43.6335 | 0.85093 | 0.38598 | 2.20463 | 0.02748  | 0.28689  | 25.6258 | 33.6246 | 34.0948 | 52.108  | 43.582  | 72.7655 | Up   |
| Acsf6     | 36.8709 | -2.1866 | 0.94207 | -2.321  | 0.02028  | 0.24108  | 21.6834 | 123.62  | 36.0431 | 18.3911 | 0.9905  | 20.4973 | Down |
| Tnfp1     | 2442.18 | 0.34202 | 0.15245 | 2.24357 | 0.02486  | 0.27251  | 2489.65 | 1952.2  | 2020.36 | 2722.9  | 2944.76 | 2523.22 | Up   |
| Gm2a      | 6190.27 | 0.39621 | 0.17657 | 2.2439  | 0.02484  | 0.27245  | 5914.64 | 5455.09 | 4667.1  | 6720.91 | 8334.07 | 6049.78 | Up   |
| Gria1     | 1059.84 | -0.6074 | 0.20643 | -2.9423 | 0.00326  | 0.07204  | 967.868 | 1332.13 | 1539.14 | 812.272 | 909.28  | 798.371 | Down |
| Gm12250   | 328.149 | 1.23195 | 0.53532 | 2.30136 | 0.02137  | 0.24952  | 320.323 | 179.99  | 87.6725 | 369.865 | 782.496 | 228.545 | Up   |
| Irgm2     | 4276.96 | 0.90543 | 0.39198 | 2.30985 | 0.0209   | 0.24604  | 2867.14 | 3165.65 | 2899.04 | 4021.51 | 9745.54 | 2962.89 | Up   |
| Olfr317   | 9.70334 | -2.6351 | 0.95641 | -2.7552 | 0.00586  | 0.1067   | 5.91365 | 27.6908 | 16.5604 | 2.04345 | 3.962   | 2.04973 | Down |
| Olfr316   | 6.39979 | -5.1034 | 1.47826 | -3.4523 | 0.00056  | 0.02063  | 15.7697 | 13.8454 | 7.79311 | 0       | 0.9905  | 0       | Down |
| Olfr314   | 7.10254 | -1.8746 | 0.92703 | -2.0222 | 0.04316  | 0.37341  | 8.87048 | 16.8123 | 7.79311 | 5.10863 | 1.981   | 2.04973 | Down |
| Obecn     | 1411.38 | -3.6517 | 1.07825 | -3.3867 | 0.00071  | 0.02449  | 1629.21 | 4808.31 | 1406.66 | 72.5425 | 497.231 | 54.3179 | Down |
| Aldh3a1   | 2102.06 | -1.3506 | 0.37313 | -3.6196 | 0.0003   | 0.01275  | 2555.68 | 4394.93 | 2109.01 | 1215.85 | 673.541 | 1663.36 | Down |
| Slc47a1   | 351.296 | -1.3046 | 0.38854 | -3.3576 | 0.00079  | 0.02632  | 397.2   | 751.608 | 351.664 | 180.845 | 292.198 | 134.257 | Down |
| Grap      | 5443.26 | 0.34003 | 0.16307 | 2.08525 | 0.03705  | 0.34277  | 4669.81 | 4428.55 | 5315.87 | 6645.3  | 6541.27 | 5058.74 | Up   |
| Akap10    | 1591.1  | 0.24631 | 0.12509 | 1.96913 | 0.04894  | 0.3964   | 1530.65 | 1394.43 | 1441.73 | 1887.13 | 1689.79 | 1602.89 | Up   |
| Trpv2     | 1180.85 | 0.70913 | 0.26379 | 2.68828 | 0.00718  | 0.12136  | 1069.39 | 827.758 | 791.975 | 1389.55 | 1965.15 | 1041.26 | Up   |
| Tvp23bos  | 37.8252 | 1.28916 | 0.57297 | 2.24995 | 0.02445  | 0.26955  | 39.4243 | 11.8675 | 14.6121 | 38.8256 | 51.506  | 70.7157 | Up   |
| Hs3st3a1  | 243.872 | 0.82356 | 0.3256  | 2.52937 | 0.01143  | 0.16462  | 224.719 | 176.035 | 127.612 | 311.626 | 410.067 | 213.172 | Up   |
| Myocd     | 109.167 | -1.4446 | 0.38934 | -3.7104 | 0.00021  | 0.00963  | 93.6328 | 236.361 | 149.043 | 52.108  | 63.3921 | 60.4671 | Down |
| Gm12295   | 90.7549 | -2.779  | 0.69714 | -3.9862 | 6.71E-05 | 0.00394  | 119.259 | 295.698 | 60.3966 | 9.19553 | 43.582  | 16.3979 | Down |
| Myh8      | 6.74274 | -6.1781 | 1.75364 | -3.523  | 0.00043  | 0.01675  | 4.92804 | 30.6577 | 4.87069 | 0       | 0       | 0       | Down |
| Dhrs7c    | 355.139 | -4.0033 | 1.59742 | -2.5061 | 0.01221  | 0.17151  | 408.042 | 1246.09 | 351.664 | 1.02173 | 117.87  | 6.1492  | Down |
| Pik3r5    | 1182.91 | 0.9766  | 0.35273 | 2.76866 | 0.00563  | 0.10469  | 924.501 | 780.288 | 686.768 | 1434.5  | 2420.78 | 850.639 | Up   |
| Ccdc42    | 160.278 | -0.7796 | 0.3394  | -2.297  | 0.02162  | 0.25019  | 131.086 | 272.952 | 203.595 | 112.39  | 95.0881 | 146.556 | Down |
| Myh10     | 9269.38 | -0.3414 | 0.15296 | -2.2318 | 0.02563  | 0.27683  | 10320.3 | 10534.4 | 10228.5 | 8308.67 | 9399.85 | 6824.58 | Down |
| Aurkb     | 165.415 | 1.49576 | 0.38726 | 3.86247 | 0.00011  | 0.00591  | 86.7336 | 111.752 | 61.3707 | 293.235 | 303.093 | 136.307 | Up   |
| Vamp2     | 7942.18 | -0.2231 | 0.08699 | -2.5647 | 0.01033  | 0.15431  | 8705.88 | 8491.19 | 8468.19 | 7586.31 | 7204.9  | 7196.61 | Down |
| Atp1b2    | 533.376 | -0.5146 | 0.16131 | -3.1901 | 0.00142  | 0.03994  | 616.991 | 659.635 | 605.914 | 378.038 | 446.716 | 492.96  | Down |
| Sat2      | 158.68  | -0.5644 | 0.222   | -2.5424 | 0.01101  | 0.16084  | 163.611 | 196.803 | 207.492 | 130.781 | 110.936 | 142.456 | Down |
| Ybx2      | 157.798 | -0.9378 | 0.35606 | -2.6337 | 0.00845  | 0.13521  | 116.302 | 271.963 | 233.793 | 120.564 | 111.927 | 92.2379 | Down |
| Slc2a4    | 722.835 | -3.0658 | 0.54624 | -5.6126 | 1.99E-08 | 4.78E-06 | 802.286 | 2510.96 | 561.104 | 77.6511 | 187.205 | 197.799 | Down |
| Acadvl    | 2262.42 | -0.4964 | 0.1901  | -2.611  | 0.00903  | 0.14115  | 2506.4  | 3280.37 | 2156.74 | 1742.04 | 1901.76 | 1987.21 | Down |
| Clec10a   | 268.189 | -0.7972 | 0.35932 | -2.2187 | 0.02651  | 0.28156  | 327.222 | 495.468 | 198.724 | 233.975 | 202.062 | 151.68  | Down |
| Alox15    | 110.632 | -3.0866 | 1.23374 | -2.5018 | 0.01236  | 0.17237  | 81.8055 | 436.131 | 75.9828 | 14.3042 | 52.4965 | 3.0746  | Down |
| Arrb2     | 2108.85 | 0.43413 | 0.19342 | 2.24454 | 0.0248   | 0.27238  | 2122.02 | 1586.29 | 1673.57 | 2407.18 | 2835.8  | 2028.21 | Up   |
| Cxcl16    | 4085.32 | 0.42558 | 0.14949 | 2.84697 | 0.00441  | 0.08866  | 3523.55 | 3312.02 | 3625.74 | 4964.56 | 5152.59 | 3933.44 | Up   |
| Zmynd15   | 580.277 | 0.87173 | 0.31718 | 2.74837 | 0.00599  | 0.1081   | 413.956 | 331.301 | 485.121 | 709.077 | 1069.74 | 472.463 | Up   |
| Pld2      | 2374.48 | 0.24812 | 0.11884 | 2.08779 | 0.03682  | 0.34093  | 2274.78 | 2096.59 | 2141.16 | 2548.18 | 2796.18 | 2389.99 | Up   |
| Pfn1      | 16966.6 | 0.21868 | 0.09522 | 2.29661 | 0.02164  | 0.25032  | 16030.9 | 15081.6 | 15936.9 | 19165.5 | 17601.2 | 17983.3 | Up   |
| Eno3      | 2745.91 | -1.6663 | 0.36936 | -4.5115 | 6.44E-06 | 0.00062  | 2958.8  | 6807    | 2762.66 | 1057.49 | 1731.4  | 1158.1  | Down |
| Inca1     | 131.089 | -0.577  | 0.22356 | -2.5809 | 0.00985  | 0.15019  | 174.453 | 151.311 | 145.147 | 91.9553 | 110.936 | 112.735 | Down |
| Scimp     | 239.97  | 1.09918 | 0.34183 | 3.21557 | 0.0013   | 0.03739  | 236.546 | 101.863 | 119.819 | 316.735 | 362.523 | 302.335 | Up   |
| Mis12     | 1405.9  | 0.37034 | 0.11974 | 3.09298 | 0.00198  | 0.05034  | 1306.92 | 1130.38 | 1242.03 | 1594.91 | 1641.26 | 1519.88 | Up   |
| Pimreg    | 107.881 | 2.04809 | 0.48575 | 4.21631 | 2.48E-05 | 0.00178  | 30.5539 | 68.2381 | 27.2759 | 253.388 | 167.395 | 100.437 | Up   |
| Pitpnm3   | 2834.33 | -0.3872 | 0.17976 | -2.1539 | 0.03125  | 0.30941  | 2670.01 | 3379.27 | 3587.75 | 2495.05 | 2107.79 | 2766.11 | Down |
| Xaf1      | 3174.54 | 0.69312 | 0.20446 | 3.39002 | 0.0007   | 0.0243   | 2889.8  | 2386.36 | 2002.83 | 3939.77 | 4592.95 | 3235.5  | Up   |
| Itgae     | 420.111 | 0.77657 | 0.37302 | 2.08183 | 0.03736  | 0.34417  | 460.279 | 215.593 | 253.276 | 458.755 | 759.714 | 373.051 | Up   |
| Aspa      | 852.031 | -0.4727 | 0.17831 | -2.651  | 0.00802  | 0.13049  | 882.12  | 1202.57 | 886.466 | 749.946 | 699.294 | 691.784 | Down |
| Cluh      | 3319.97 | -0.3423 | 0.16236 | -2.1082 | 0.03501  | 0.3306   | 3111.57 | 4386.03 | 3638.41 | 2841.42 | 2977.45 | 2964.94 | Down |
| Serpinf1  | 2073.8  | -0.4808 | 0.20576 | -2.3367 | 0.01945  | 0.23509  | 2093.43 | 3063.79 | 2091.48 | 1703.22 | 1944.35 | 1546.52 | Down |
| Slc6a4    | 558.072 | 0.5592  | 0.26336 | 2.1233  | 0.03373  | 0.32401  | 361.718 | 549.861 | 442.259 | 509.841 | 864.707 | 620.044 | Up   |
| Efcab5    | 190.178 | -0.6575 | 0.27626 | -2.3802 | 0.0173   | 0.21738  | 211.906 | 281.853 | 204.569 | 114.433 | 137.68  | 190.625 | Down |
| Coro6     | 907.632 | -1.3344 | 0.37376 | -3.5702 | 0.00036  | 0.01467  | 880.149 | 2050.11 | 969.268 | 528.232 | 669.579 | 348.454 | Down |
| Spag5     | 145.174 | 0.75935 | 0.27589 | 2.75242 | 0.00592  | 0.10726  | 115.316 | 110.763 | 97.4139 | 232.953 | 178.29  | 136.307 | Up   |
| Lyrm9     | 486.744 | -0.5037 | 0.16228 | -3.1039 | 0.00191  | 0.04907  | 560.811 | 618.099 | 533.828 | 372.93  | 456.621 | 378.176 |      |

|          |         |         |           |         |          |          |         |         |         |         |         |         |      |
|----------|---------|---------|-----------|---------|----------|----------|---------|---------|---------|---------|---------|---------|------|
| Slf9     | 230.658 | 1.20982 | 0.37172   | 3.25466 | 0.00114  | 0.03405  | 203.035 | 90.9841 | 123.716 | 398.473 | 355.59  | 212.147 | Up   |
| Gm11427  | 162.534 | 0.80774 | 0.26616   | 3.03475 | 0.00241  | 0.05757  | 124.187 | 99.8848 | 130.535 | 191.063 | 262.483 | 167.053 | Up   |
| Ras110b  | 223.509 | -1.3559 | 0.50445   | -2.6878 | 0.00719  | 0.12138  | 262.172 | 572.607 | 129.56  | 143.042 | 147.585 | 86.0887 | Down |
| Gas2l2   | 515.327 | -0.6983 | 0.3343    | -2.0888 | 0.03672  | 0.3402   | 499.704 | 826.769 | 586.431 | 365.778 | 249.606 | 563.676 | Down |
| Ccl5     | 839.856 | 0.73178 | 0.28152   | 2.59938 | 0.00934  | 0.14426  | 660.358 | 677.436 | 556.233 | 1004.36 | 1453.06 | 687.685 | Up   |
| Ccl9     | 1710.8  | 0.85925 | 0.36373   | 2.36236 | 0.01816  | 0.22436  | 937.314 | 1711.89 | 998.492 | 2573.73 | 2857.59 | 1185.77 | Up   |
| Ccl3     | 172.389 | 1.03355 | 0.37897   | 2.72722 | 0.00639  | 0.11296  | 171.496 | 93.951  | 74.0345 | 287.105 | 240.692 | 167.053 | Up   |
| Wfdc17   | 171.66  | 1.18822 | 0.50956   | 2.33184 | 0.01971  | 0.23657  | 62.0933 | 180.979 | 71.1121 | 240.105 | 350.637 | 125.034 | Up   |
| Dhrs11   | 748.829 | -0.5722 | 0.20066   | -2.8516 | 0.00435  | 0.08771  | 771.732 | 1131.37 | 783.207 | 592.601 | 631.94  | 582.124 | Down |
| Brip1    | 112.16  | 0.8682  | 0.40432   | 2.1473  | 0.03177  | 0.31185  | 83.7767 | 101.863 | 52.6035 | 163.476 | 187.205 | 84.039  | Up   |
| Prr11    | 146.185 | 1.24256 | 0.39307   | 3.16116 | 0.00157  | 0.04279  | 119.259 | 71.205  | 70.138  | 243.171 | 257.53  | 115.81  | Up   |
| Mtmr4    | 3073.06 | 0.33701 | 0.1667    | 2.02174 | 0.0432   | 0.37341  | 2525.13 | 2630.63 | 2991.58 | 3366.59 | 4004.59 | 2919.84 | Up   |
| Mir142hg | 281.266 | 0.37547 | 0.19122   | 1.9636  | 0.04958  | 0.39948  | 234.575 | 284.82  | 215.285 | 334.104 | 330.827 | 287.987 | Up   |
| Tspoap1  | 885.8   | -0.6853 | 0.32451   | -2.1117 | 0.03471  | 0.32919  | 826.926 | 1361.8  | 1088.11 | 632.448 | 430.868 | 974.647 | Down |
| Olfr464  | 38.4408 | -1.8929 | 0.86934   | -2.1774 | 0.02945  | 0.29843  | 113.345 | 9.88958 | 58.4483 | 19.4128 | 4.9525  | 24.5968 | Down |
| Dynll2   | 6045.58 | -0.2698 | 0.10079   | -2.6774 | 0.00742  | 0.12358  | 6521.77 | 6587.45 | 6718.63 | 5437.62 | 5171.4  | 5836.61 | Down |
| Cuedc1   | 2535.72 | -0.2242 | 0.10761   | -2.0837 | 0.03719  | 0.34382  | 2709.44 | 2685.02 | 2802.6  | 2250.86 | 2251.41 | 2515.02 | Down |
| Akap1    | 2079.69 | -0.239  | 0.10922   | -2.1878 | 0.02868  | 0.29288  | 2245.22 | 2281.53 | 2227.85 | 1773.72 | 1920.58 | 2029.23 | Down |
| Tmem100  | 39372.1 | 0.31759 | 0.16116   | 1.97059 | 0.04877  | 0.39549  | 30013.8 | 34138.8 | 41015.1 | 47277.3 | 43667.2 | 40120.4 | Up   |
| B230206L | 164.701 | -0.8756 | 0.32072   | -2.7302 | 0.00633  | 0.1124   | 195.151 | 203.725 | 240.612 | 132.824 | 69.3351 | 146.556 | Down |
| Cacna1g  | 33.6486 | -1.3974 | 0.5889    | -2.3728 | 0.01765  | 0.22022  | 23.6546 | 62.3044 | 60.3966 | 24.5214 | 21.791  | 9.22379 | Down |
| Sgca     | 162.391 | -3.1175 | 0.60462   | -5.1561 | 2.52E-07 | 4.06E-05 | 183.323 | 568.651 | 121.767 | 30.6518 | 51.506  | 18.4476 | Down |
| Pdk2     | 2571    | -0.422  | 0.17993   | -2.3451 | 0.01902  | 0.23116  | 2779.42 | 3592.88 | 2460.67 | 2157.88 | 2082.03 | 2353.09 | Down |
| Atp5g1   | 3252.23 | -0.8351 | 0.26483   | -3.1532 | 0.00161  | 0.04332  | 3255.47 | 5926.83 | 3321.81 | 2302.97 | 2064.2  | 2642.1  | Down |
| Hoxb13   | 3.78352 | -3.3449 | 1.68493   | -1.9852 | 0.04713  | 0.38902  | 1.97122 | 11.8675 | 6.81897 | 2.04345 | 0       | 0       | Down |
| Skap1    | 615.756 | 0.60589 | 0.19255   | 3.14667 | 0.00165  | 0.04403  | 463.236 | 479.645 | 522.138 | 815.337 | 831.03  | 583.149 | Up   |
| Ppp1r1b  | 153.71  | -0.9699 | 0.40512   | -2.3942 | 0.01666  | 0.21248  | 206.978 | 283.831 | 119.819 | 67.4339 | 139.661 | 104.536 | Down |
| Tcap     | 2552.26 | -3.1564 | 0.98935   | -3.1904 | 0.00142  | 0.03994  | 5205    | 6478.66 | 2085.63 | 107.281 | 1148.98 | 287.987 | Down |
| Thra     | 3482.16 | -0.2602 | 0.11908   | -2.185  | 0.02889  | 0.29455  | 3430.9  | 3981.55 | 3973.51 | 3086.63 | 3320.16 | 3100.22 | Down |
| Nr1d1    | 10981.6 | 0.46886 | 0.20808   | 2.2533  | 0.02424  | 0.26823  | 12085.5 | 7506.19 | 8046.38 | 13241.6 | 12610.1 | 12399.9 | Up   |
| Cdc6     | 161.691 | 0.7681  | 0.34666   | 2.21574 | 0.02671  | 0.28205  | 165.582 | 95.9289 | 97.4139 | 266.67  | 201.072 | 143.481 | Up   |
| Top2a    | 736.386 | 1.51896 | 0.3345    | 4.54093 | 5.60E-06 | 0.00056  | 358.762 | 455.91  | 328.285 | 1394.66 | 1297.56 | 583.149 | Up   |
| Krt222   | 100.633 | -1.3103 | 0.47013   | -2.7871 | 0.00532  | 0.10049  | 92.6472 | 238.339 | 99.3621 | 58.2383 | 76.2686 | 38.9449 | Down |
| A830036E | 13.8823 | 1.8945  | 0.94712   | 2.00027 | 0.04547  | 0.38155  | 9.85609 | 0       | 7.79311 | 14.3042 | 26.7435 | 24.5968 | Up   |
| Krt34    | 3.19959 | 5.14556 | 2.44631   | 2.1034  | 0.03543  | 0.33353  | 0       | 0       | 0       | 0       | 7.92401 | 11.2735 | Up   |
| Krt15    | 87.186  | -4.4074 | 1.93594   | -2.2766 | 0.02281  | 0.25801  | 5.91365 | 439.097 | 54.5518 | 6.13035 | 0       | 17.4227 | Down |
| Krt9     | 56.7644 | -0.8874 | 0.30344   | -2.9245 | 0.00345  | 0.07465  | 67.0214 | 72.1939 | 81.8276 | 38.8256 | 36.6485 | 44.0692 | Down |
| Kcnh4    | 63.718  | 1.62925 | 0.66744   | 2.44104 | 0.01465  | 0.19355  | 52.2373 | 17.8012 | 23.3793 | 83.7815 | 173.338 | 31.7708 | Up   |
| Aoc3     | 510.477 | -2.239  | 0.45054   | -4.9697 | 6.71E-07 | 9.66E-05 | 512.517 | 1523    | 491.94  | 149.172 | 151.547 | 234.694 | Down |
| Brca1    | 124.955 | 0.9498  | 0.29424   | 3.22797 | 0.00125  | 0.03633  | 96.5897 | 90.9841 | 68.1897 | 207.41  | 159.471 | 127.083 | Up   |
| Sost     | 15.8065 | -3.0684 | 1.05032   | -2.9214 | 0.00349  | 0.07481  | 10.8417 | 56.3706 | 17.5345 | 6.13035 | 3.962   | 0       | Down |
| Nags     | 42.0256 | -1.5206 | 0.5921    | -2.5681 | 0.01022  | 0.15345  | 94.6184 | 49.4479 | 42.8621 | 29.63   | 7.92401 | 27.6714 | Down |
| 2810433D | 163.994 | 0.66005 | 0.31889   | 2.06984 | 0.03847  | 0.35169  | 172.482 | 89.9952 | 118.845 | 238.062 | 155.509 | 209.073 | Up   |
| Kif18b   | 115.209 | 1.11591 | 0.36389   | 3.06665 | 0.00216  | 0.05343  | 63.079  | 85.0504 | 70.138  | 207.41  | 173.338 | 92.2379 | Up   |
| My14     | 10468.9 | -4.239  | 1.2356    | -3.4307 | 0.0006   | 0.02181  | 11188.6 | 36765.5 | 11700.4 | 270.757 | 2619.87 | 268.515 | Down |
| Ace      | 30777.1 | 0.34504 | 0.12661   | 2.72519 | 0.00643  | 0.11347  | 27610.8 | 27062.8 | 26669   | 35489.6 | 37642   | 30188.4 | Up   |
| Taco1    | 382.691 | -0.3291 | 0.16748   | -1.9652 | 0.04939  | 0.39825  | 420.855 | 479.645 | 377.966 | 360.669 | 322.903 | 334.106 | Down |
| Limd2    | 5724.74 | 0.26597 | 0.10699   | 2.48603 | 0.01292  | 0.17801  | 5556.86 | 5083.24 | 4955.44 | 6143.63 | 6046.02 | 6563.24 | Up   |
| Scn4a    | 106.793 | -1.3882 | 0.35385   | -3.923  | 8.75E-05 | 0.00483  | 129.115 | 221.527 | 113     | 68.4556 | 58.4396 | 50.2184 | Down |
| Prr29    | 886.378 | -0.7303 | 0.26679   | -2.7374 | 0.00619  | 0.11033  | 884.091 | 1408.28 | 1025.77 | 537.428 | 584.396 | 878.31  | Down |
| Milr1    | 230.607 | 0.83122 | 0.37458   | 2.21908 | 0.02648  | 0.28143  | 182.338 | 193.836 | 121.767 | 266.67  | 442.754 | 176.277 | Up   |
| Gm11677  | 3.11847 | -5.0656 | 1.79732   | -2.8184 | 0.00483  | 0.09356  | 5.91365 | 8.90062 | 3.89655 | 0       | 0       | 0       | Down |
| BC006965 | 3.46507 | -3.2038 | 1.59406   | -2.0098 | 0.04445  | 0.37865  | 4.92804 | 11.8675 | 1.94828 | 1.02173 | 0       | 1.02487 | Down |
| Sox9     | 34.4577 | -2.712  | 0.67693   | -4.0063 | 6.17E-05 | 0.0037   | 37.4531 | 108.785 | 33.1207 | 14.3042 | 6.93351 | 6.1492  | Down |
| 2610035D | 291.364 | 1.12205 | 0.32079   | 3.49774 | 0.00047  | 0.01809  | 138.971 | 215.593 | 195.802 | 484.298 | 466.526 | 246.993 | Up   |
| Kif19a   | 1486.06 | -0.6666 | 0.27083   | -2.4613 | 0.01385  | 0.18672  | 1643.01 | 2056.04 | 1770.98 | 1023.77 | 804.287 | 1618.26 | Down |
| Cd300a   | 713.767 | 0.79504 | 0.40187   | 1.97837 | 0.04789  | 0.39216  | 559.826 | 568.651 | 437.388 | 566.036 | 1579.85 | 570.85  | Up   |
| Cd300ld  | 402.641 | 1.11623 | 0.3433    | 3.2515  | 0.00115  | 0.03429  | 298.639 | 285.809 | 178.267 | 439.342 | 817.163 | 396.623 | Up   |
| Cd300c2  | 1014.32 | 1.33472 | 0.35925   | 3.71525 | 0.0002   | 0.00951  | 730.336 | 589.419 | 408.164 | 1168.85 | 2252.4  | 936.727 | Up   |
| Cd300e   | 301.94  | 1.04212 | 0.5004    | 2.08255 | 0.03729  | 0.34397  | 189.237 | 241.306 | 161.707 | 247.258 | 781.505 | 190.625 | Up   |
| Rab37    | 117.671 | 0.79227 | 0.30774   | 2.57449 | 0.01004  | 0.15202  | 88.7048 | 86.0394 | 83.7759 | 125.672 | 206.024 | 115.81  | Up   |
| Tmem104  | 1180.08 | 0.23827 | 0.10892   | 2.18752 | 0.0287   | 0.29295  | 1078.26 | 1106.64 | 1063.76 | 1227.09 | 1343.12 | 1261.61 | Up   |
| Tsen54   | 1221.14 | -0.4033 | 0.14371   | -2.8067 | 0.00501  | 0.09615  | 1306.92 | 1389.49 | 1475.82 | 918.531 | 1098.47 | 1137.6  | Down |
| Myo15b   | 639.531 | -1.2848 | 0.28338   | -4.5337 | 5.80E-06 | 0.00057  | 820.026 | 969.179 | 931.276 | 264.627 | 312.998 | 539.079 | Down |
| Ubal2    | 1551.12 | 0.27839 | 0.10642   | 2.61607 | 0.00889  | 0.14016  | 1364.08 | 1433    | 1408.6  | 1717.52 | 1611.54 | 1771.99 | Up   |
| Mxra7    | 4153.06 | 0.25814 | 0.1084    | 2.38131 | 0.01725  | 0.21705  | 3672.38 | 3894.52 | 3780.63 | 4802.11 | 4579.09 | 4189.65 | Up   |
| Gm11734  | 211.964 | -0.9331 | 0.38383   | -2.431  | 0.01506  | 0.19718  | 188.251 | 356.025 | 290.293 | 135.889 | 88.1546 | 213.172 | Down |
| Birc5    | 217.538 | 1.11494 | 0.34606   | 3.22182 | 0.00127  | 0.03687  | 163.611 | 149.333 | 99.3621 | 417.886 | 280.312 | 194.725 | Up   |
| Cep131   | 700.137 | -0.3115 | 0.15325   | -2.0327 | 0.04208  | 0.37095  | 750.048 | 777.321 | 798.794 | 593.622 | 562.604 | 718.431 | Down |
| Gcgr     | 95.6692 | -2.3605 | 0.44742   | -5.2757 | 1.32E-07 | 2.40E-05 | 194.165 | 116.697 | 169.5   | 27.5866 | 15.848  | 50.2184 | Down |
| Myadml2  | 87.6348 | -2.8901 | 0.61184   | -4.7237 | 2.32E-06 | 0.00026  | 90.676  | 297.676 | 75.0087 | 20.4345 | 29.715  | 12.2984 | Down |
| Metnrl   | 938.932 | 0.43647 | 0.21645   | 2.01649 | 0.04375  | 0.37549  | 937.314 | 869.294 | 587.406 | 972.683 | 1184.64 | 1082.26 | Up   |
| Gm12586  | 26.7928 | -8.1688 | 3.90839   | -2.0901 | 0.03661  | 0.3402   | 85.748  | 0       | 75.0087 | 0       | 0       | 0       | Down |
| Pomc     | 13.8868 | -1.3687 | 0.66879   | -2.0465 | 0.04071  | 0.36296  | 16.7553 | 30.6577 | 12.6638 | 6.13035 | 8.91451 | 8.19893 | Down |
| Fam228b  | 69.803  | -0.7429 | 0.34264   | -2.1681 | 0.03015  | 0.30293  | 66.0358 | 88.0173 | 108.129 | 39.8473 | 60.4206 | 56.3676 | Down |
| Apob     | 228.495 | 2.17815 | 0.50632   | 4.30189 | 1.69E-05 | 0.00128  | 80.8199 | 115.708 | 51.6293 | 187.997 | 675.522 | 259.291 | Up   |
| Osr1     | 511.648 | -0.5955 | 0.16664   | -3.5736 | 0.00035  | 0.01458  | 516.459 | 661.613 | 669.233 | 410.734 | 409.077 | 402.772 | Down |
| Gen1     | 83.7062 | 0.96353 | 0.40786</ |         |          |          |         |         |         |         |         |         |      |

|           |         |         |         |         |          |          |          |         |         |         |         |         |      |
|-----------|---------|---------|---------|---------|----------|----------|----------|---------|---------|---------|---------|---------|------|
| Odc1      | 7181.52 | 0.38887 | 0.16871 | 2.30492 | 0.02117  | 0.24807  | 6638.07  | 6133.52 | 5886.72 | 7595.51 | 7005.81 | 9829.49 | Up   |
| Gm36862   | 6.72788 | -4.255  | 1.45131 | -2.9318 | 0.00337  | 0.07357  | 5.91365  | 21.7571 | 10.7155 | 0       | 1.981   | 0       | Down |
| Gm46313   | 3.27286 | -5.1358 | 1.74357 | -2.9456 | 0.00322  | 0.07154  | 6.89926  | 4.94479 | 7.79311 | 0       | 0       | 0       | Down |
| Gm46338   | 1.96883 | -4.4022 | 2.04839 | -2.1491 | 0.03163  | NA       | 2.95683  | 5.93375 | 2.92242 | 0       | 0       | 0       | Down |
| Gm5784    | 26.3312 | 2.30494 | 0.78545 | 2.93453 | 0.00334  | 0.07329  | 19.7122  | 4.94479 | 1.94828 | 54.1514 | 48.5345 | 28.6962 | Up   |
| Gm9259    | 4.90686 | -5.7202 | 1.61456 | -3.5429 | 0.0004   | 0.01595  | 5.91365  | 9.88958 | 13.6379 | 0       | 0       | 0       | Down |
| Gm49692   | 135.869 | -2.4062 | 0.27975 | -8.6014 | 7.88E-18 | 8.10E-15 | 179.381  | 258.118 | 248.405 | 38.8256 | 50.5155 | 39.9698 | Down |
| Gm48693   | 43.8747 | -0.9813 | 0.48676 | -2.0161 | 0.04379  | 0.37573  | 53.2229  | 53.4037 | 68.1897 | 23.4997 | 48.5345 | 16.3979 | Down |
| 1700030C  | 225.159 | -1.0832 | 0.41008 | -2.6415 | 0.00825  | 0.13283  | 142.913  | 421.296 | 353.612 | 148.15  | 175.319 | 109.661 | Down |
| Cpsf3     | 3859.86 | 0.45183 | 0.13378 | 3.37739 | 0.00073  | 0.02509  | 3630     | 3136.98 | 3013.98 | 4394.44 | 4171    | 4812.77 | Up   |
| lah1      | 2002.26 | 1.23934 | 0.2652  | 4.67316 | 2.97E-06 | 0.00032  | 1720.87  | 899.952 | 953.682 | 2810.77 | 2725.86 | 2902.42 | Up   |
| Adam17    | 2865.54 | 0.25903 | 0.12942 | 2.00152 | 0.04534  | 0.38132  | 2607.92  | 2580.19 | 2638.94 | 3163.26 | 3443.97 | 2758.94 | Up   |
| Gm49586   | 4.08737 | -4.4355 | 1.60842 | -2.7577 | 0.00582  | 0.10618  | 6.89926  | 4.94479 | 11.6897 | 0       | 0.9905  | 0       | Down |
| Ywha9     | 14413.8 | 0.28712 | 0.13083 | 2.19463 | 0.02819  | 0.28986  | 12911.5  | 13088.9 | 12952.1 | 16039   | 13852.2 | 17639   | Up   |
| Gm4036    | 13.1488 | -1.9504 | 0.90077 | -2.1653 | 0.03037  | 0.30443  | 10.8417  | 12.8565 | 38.9655 | 10.2173 | 3.962   | 2.04973 | Down |
| Gm20336   | 4.76834 | -3.709  | 1.51153 | -2.4538 | 0.01414  | 0.18925  | 4.92804  | 13.8454 | 7.79311 | 2.04345 | 0       | 0       | Down |
| Gm9292    | 10.5075 | -4.3091 | 1.11089 | -3.879  | 0.0001   | 0.00561  | 14.7841  | 29.6687 | 15.5862 | 0       | 1.981   | 1.02487 | Down |
| Gm6969    | 293.038 | -2.4506 | 0.6207  | -3.9482 | 7.88E-05 | 0.00445  | 795.386  | 605.242 | 85.7242 | 100.129 | 101.031 | 70.7157 | Down |
| Rrm2      | 340.678 | 1.359   | 0.33318 | 4.07883 | 4.53E-05 | 0.00291  | 189.237  | 218.56  | 165.604 | 633.47  | 564.585 | 272.614 | Up   |
| Mboat2    | 253.705 | -0.9714 | 0.34206 | -2.8397 | 0.00452  | 0.0902   | 237.532  | 522.17  | 248.405 | 171.65  | 172.347 | 170.128 | Down |
| Kidins220 | 6079.95 | 0.24031 | 0.12079 | 1.98943 | 0.04665  | 0.38675  | 6206.38  | 5343.34 | 5174.62 | 6597.28 | 6740.36 | 6417.71 | Up   |
| Id2       | 4130.46 | 0.64801 | 0.12314 | 5.26235 | 1.42E-07 | 2.56E-05 | 3528.48  | 3222.03 | 2903.91 | 4845.02 | 5175.37 | 5107.93 | Up   |
| Gm17746   | 4.09293 | -5.4583 | 1.93883 | -2.8153 | 0.00487  | 0.09431  | 0.98561  | 12.8565 | 10.7155 | 0       | 0       | 0       | Down |
| Gm36723   | 168.529 | 1.26483 | 0.37485 | 3.37419 | 0.00074  | 0.02526  | 142.913  | 89.9952 | 64.2931 | 228.866 | 314.979 | 170.128 | Up   |
| Rnf144a   | 7866.12 | 0.32012 | 0.14752 | 2.16997 | 0.03001  | 0.30184  | 7288.58  | 6111.76 | 7590.49 | 9633.85 | 7918.06 | 8653.97 | Up   |
| Cmpk2     | 1540.14 | 0.27328 | 0.12589 | 2.17087 | 0.02994  | 0.30129  | 1302.97  | 1536.84 | 1344.31 | 1634.76 | 1656.12 | 1765.84 | Up   |
| Sox11     | 849.369 | 0.88221 | 0.26923 | 3.27675 | 0.00105  | 0.03233  | 800.314  | 416.351 | 575.716 | 1248.55 | 903.337 | 1151.95 | Up   |
| Gm31333   | 7.0227  | 2.12403 | 0.89537 | 2.37222 | 0.01768  | 0.22046  | 2.95683  | 2.96687 | 1.94828 | 10.2173 | 15.848  | 8.19893 | Up   |
| Slc26a4   | 611.761 | 1.55967 | 0.41078 | 3.79686 | 0.00015  | 0.00729  | 388.33   | 316.467 | 225.026 | 843.945 | 1454.06 | 442.742 | Up   |
| Pik3cg    | 709.954 | 0.94388 | 0.37934 | 2.48823 | 0.01284  | 0.17726  | 599.25   | 492.501 | 365.302 | 741.773 | 1509.52 | 551.378 | Up   |
| Twist1    | 18.5264 | -2.4403 | 1.10755 | -2.2033 | 0.02757  | 0.28707  | 11.8273  | 78.1277 | 3.89655 | 4.0869  | 2.9715  | 10.2487 | Down |
| Agr2      | 156.225 | -2.7631 | 1.09642 | -2.5201 | 0.01173  | 0.16717  | 142.913  | 582.496 | 91.569  | 16.3476 | 14.8575 | 89.1633 | Down |
| Lsmem1    | 48.8043 | -1.8542 | 0.60386 | -3.0706 | 0.00214  | 0.05296  | 38.4387  | 134.498 | 56.5    | 14.3042 | 32.6865 | 16.3979 | Down |
| Nrcam     | 555.87  | -1.0118 | 0.51158 | -1.9778 | 0.04796  | 0.39243  | 200.079  | 1191.69 | 837.759 | 409.712 | 381.343 | 314.634 | Down |
| Gm48508   | 2.35932 | 3.63952 | 1.79167 | 2.03135 | 0.04222  | 0.37137  | 0        | 0.98896 | 0       | 6.13035 | 3.962   | 3.0746  | Up   |
| Nova1     | 843.601 | -0.6777 | 0.16198 | -4.184  | 2.86E-05 | 0.00202  | 868.321  | 1157.08 | 1089.09 | 654.926 | 625.006 | 667.188 | Down |
| Coch      | 115.171 | -1.7748 | 0.44669 | -3.9732 | 7.09E-05 | 0.00409  | 143.899  | 279.875 | 111.052 | 36.7821 | 73.2971 | 46.119  | Down |
| Gm35188   | 306.515 | -0.4303 | 0.17629 | -2.441  | 0.01465  | 0.19355  | 330.179  | 374.815 | 350.69  | 267.845 | 263.473 | 292.087 | Down |
| Akap6     | 531.24  | -1.7996 | 0.42042 | -4.2804 | 1.87E-05 | 0.00138  | 551.941  | 1451.79 | 472.457 | 194.128 | 278.331 | 238.794 | Down |
| Baz1a     | 2036.75 | 0.47157 | 0.19162 | 2.4609  | 0.01386  | 0.18672  | 1896.31  | 1613.98 | 1610.25 | 2372.45 | 2841.75 | 1885.75 | Up   |
| Gm49376   | 143.172 | 0.61809 | 0.22691 | 2.72399 | 0.00645  | 0.1138   | 104.475  | 104.83  | 129.56  | 194.128 | 173.338 | 152.705 | Up   |
| Gm38103   | 41.8265 | 1.18245 | 0.40194 | 2.94181 | 0.00326  | 0.07204  | 33.5107  | 26.7019 | 16.5604 | 65.3904 | 54.4775 | 54.3179 | Up   |
| Pax9      | 66.8968 | -4.6666 | 1.51724 | -3.0757 | 0.0021   | 0.05218  | 5.91365  | 348.113 | 32.1466 | 9.19553 | 3.962   | 2.04973 | Down |
| Gm2568    | 58.349  | -1.2866 | 0.58363 | -2.2044 | 0.02749  | 0.28689  | 58.1509  | 140.432 | 49.6811 | 34.7387 | 15.848  | 51.2433 | Down |
| Gm22973   | 7.03853 | -4.3076 | 1.39682 | -3.0839 | 0.00204  | 0.05154  | 9.85609  | 8.90062 | 21.431  | 2.04345 | 0       | 0       | Down |
| Gm527     | 234.065 | -0.4573 | 0.21643 | -2.1129 | 0.03461  | 0.32907  | 301.596  | 230.427 | 280.552 | 223.758 | 203.053 | 165.003 | Down |
| Mdga2     | 33.0239 | -1.7405 | 0.67574 | -2.5757 | 0.01     | 0.15172  | 25.6258  | 80.1056 | 46.7587 | 6.13035 | 12.8765 | 26.6465 | Down |
| Rn7s1     | 6.64121 | 6.1988  | 2.97244 | 2.08543 | 0.03703  | 0.34277  | 0        | 0       | 0       | 39.8473 | 0       | 0       | Up   |
| Lrr1      | 19.4666 | 1.83794 | 0.72724 | 2.5273  | 0.01149  | 0.16493  | 4.92804  | 8.90062 | 11.6897 | 54.1514 | 22.7815 | 14.3481 | Up   |
| Rn7s2     | 5.9417  | 3.47051 | 1.7695  | 1.9613  | 0.04984  | 0.39986  | 0.98561  | 0.98896 | 0.97414 | 30.6518 | 0       | 2.04973 | Up   |
| L2hgdh    | 755.278 | -0.303  | 0.15152 | -1.9996 | 0.04555  | 0.38182  | 814.113  | 951.378 | 737.423 | 679.447 | 662.645 | 686.66  | Down |
| Atf1      | 344.344 | -0.4856 | 0.16906 | -2.8725 | 0.00407  | 0.08354  | 373.546  | 440.086 | 391.604 | 267.692 | 273.378 | 319.758 | Down |
| Gm48695   | 3.94439 | -2.7635 | 1.30903 | -2.1111 | 0.03476  | 0.32926  | 6.89926  | 5.93375 | 7.79311 | 0       | 0.9905  | 2.04973 | Down |
| Abhd12b   | 238.019 | -1.801  | 0.59868 | -3.0083 | 0.00263  | 0.06102  | 333.136  | 329.323 | 447.13  | 65.3904 | 29.715  | 223.421 | Down |
| Gm24474   | 67.2713 | -1.4527 | 0.53854 | -2.6976 | 0.00698  | 0.11924  | 76.8775  | 169.112 | 49.6811 | 39.8473 | 45.563  | 22.547  | Down |
| Gm40437   | 142.616 | -0.5749 | 0.20758 | -2.7695 | 0.00561  | 0.10469  | 170.51   | 170.101 | 171.448 | 103.194 | 129.756 | 110.686 | Down |
| L3hyped   | 385.672 | -0.4038 | 0.20474 | -1.9722 | 0.04859  | 0.39479  | 469.15   | 481.623 | 367.25  | 314.691 | 390.257 | 291.062 | Down |
| Six1      | 864.074 | -0.7838 | 0.39522 | -1.9831 | 0.04735  | 0.39     | 974.767  | 1290.59 | 1014.08 | 538.449 | 312.998 | 1053.56 | Down |
| Trmt5     | 723.117 | -0.4532 | 0.17285 | -2.6219 | 0.00874  | 0.13855  | 762.861  | 952.367 | 791.975 | 610.992 | 534.87  | 685.635 | Down |
| DB30013C  | 44.9282 | -2.2213 | 0.75421 | -2.9452 | 0.00323  | 0.07157  | 156.1797 | 142.41  | 23.3793 | 6.13035 | 15.848  | 25.6216 | Down |
| Prkch     | 5908.67 | 0.34592 | 0.14575 | 2.3734  | 0.01763  | 0.22001  | 5274.98  | 4779.63 | 5556.49 | 6783.23 | 7328.72 | 5729    | Up   |
| Rhoj      | 4568.68 | 0.61522 | 0.17546 | 3.50627 | 0.00045  | 0.01765  | 4115.9   | 3021.27 | 3690.04 | 5676.71 | 6129.22 | 4778.95 | Up   |
| Esr2      | 217.02  | 0.48217 | 0.22551 | 2.13815 | 0.0325   | 0.31662  | 149.813  | 183.946 | 209.44  | 294.257 | 224.844 | 239.819 | Up   |
| Sptb      | 498.904 | -0.6688 | 0.33731 | -1.9826 | 0.04741  | 0.39017  | 464.222  | 963.245 | 410.112 | 350.452 | 417.991 | 387.399 | Down |
| Gm4864    | 81.384  | -0.9189 | 0.36012 | -2.5515 | 0.01072  | 0.15787  | 145.87   | 73.1829 | 100.336 | 45.9776 | 60.4206 | 62.5168 | Down |
| Arg2      | 563.284 | 0.65468 | 0.25943 | 2.52358 | 0.01162  | 0.16614  | 534.2    | 419.318 | 359.457 | 692.73  | 866.688 | 507.309 | Up   |
| Rad51b    | 627.086 | -0.6228 | 0.31049 | -2.0058 | 0.04488  | 0.38019  | 616.991  | 988.958 | 675.078 | 486.341 | 324.884 | 670.262 | Down |
| Srsf5     | 29477.1 | -0.2374 | 0.10956 | -2.1664 | 0.03028  | 0.30382  | 30695.8  | 30287.8 | 34705.6 | 27251.5 | 26002.6 | 27919.4 | Down |
| Smoc1     | 353.903 | -1.8673 | 0.52608 | -3.5495 | 0.00039  | 0.01561  | 356.79   | 1079.94 | 229.897 | 111.368 | 146.594 | 198.824 | Down |
| Pnma1     | 157.446 | -0.5379 | 0.24767 | -2.172  | 0.02986  | 0.30087  | 158.683  | 212.626 | 188.009 | 123.629 | 106.974 | 154.755 | Down |
| Npc2      | 62517.4 | 0.46288 | 0.18322 | 2.52643 | 0.01152  | 0.16512  | 63623    | 49224.4 | 44872.7 | 65360.8 | 82335.4 | 69687.8 | Up   |
| Fos       | 10203.1 | -1.274  | 0.36085 | -3.5306 | 0.00041  | 0.0164   | 11715.9  | 19388.5 | 12205   | 8187.09 | 3035.89 | 6686.22 | Down |
| Batf      | 382.183 | 0.75338 | 0.17581 | 4.28507 | 1.83E-05 | 0.00136  | 259.215  | 287.787 | 306.854 | 479.189 | 538.832 | 421.22  | Up   |
| Flvcr2    | 1024.66 | 0.92292 | 0.2902  | 3.18026 | 0.00147  | 0.04089  | 826.926  | 682.381 | 613.707 | 1522.37 | 1688.8  | 813.743 | Up   |
| Gm805     | 13.0147 | -1.4232 | 0.69018 | -2.0621 | 0.0392   | 0.35628  | 16.7553  | 12.8565 | 27.2759 | 4.0869  | 8.91451 | 8.19893 | Down |
| Esrrb     | 31.8976 | -3.1049 | 1.07244 | -2.8951 | 0.00379  | 0.07951  | 44.3524  | 99.8848 | 27.2759 | 2.04345 | 17.829  | 0       | Down |
| Isr2      | 36.5822 | -0.858  | 0.38819 | -2.2103 | 0.02708  | 0.28467  | 40.41    | 44.5031 | 56.5    | 25.5431 | 21.791  | 30.746  | Down |
| Dio2      | 93.8558 | -2.2365 | 0.74519 | -3.0013 | 0.00269  | 0.06203  | 47.3092  | 349.102 | 68.1897 | 26.5649 |         |         |      |

|           |         |         |         |         |          |          |         |         |         |         |         |         |      |
|-----------|---------|---------|---------|---------|----------|----------|---------|---------|---------|---------|---------|---------|------|
| Ifi27I2a  | 1607.25 | -0.7621 | 0.34016 | -2.2405 | 0.02506  | 0.27344  | 1577.96 | 3172.58 | 1316.06 | 949.183 | 1419.39 | 1208.32 | Down |
| Gm47267   | 7.0896  | -2.0852 | 0.8758  | -2.3809 | 0.01727  | 0.2171   | 10.8417 | 12.8565 | 10.7155 | 2.04345 | 1.981   | 4.09946 | Down |
| Ppp4r4    | 1326.01 | -0.5539 | 0.18879 | -2.9342 | 0.00334  | 0.07329  | 1324.66 | 1587.28 | 1820.66 | 1082.01 | 1225.25 | 916.23  | Down |
| Serpina3g | 679.53  | 1.14183 | 0.4671  | 2.44453 | 0.0145   | 0.19287  | 487.876 | 486.567 | 297.112 | 854.162 | 1591.73 | 359.728 | Up   |
| Gm47648   | 58.5549 | -0.9245 | 0.33689 | -2.7443 | 0.00606  | 0.10885  | 71.9494 | 91.9731 | 66.2414 | 32.6952 | 49.525  | 38.9449 | Down |
| Bdkrb1    | 147.263 | -1.1456 | 0.23655 | -4.843  | 1.28E-06 | 0.00016  | 180.366 | 233.394 | 194.828 | 98.0856 | 100.041 | 76.8649 | Down |
| Bcl11b    | 297.219 | 0.65465 | 0.2296  | 2.85118 | 0.00436  | 0.08774  | 233.589 | 218.56  | 240.612 | 444.451 | 371.438 | 274.664 | Up   |
| Cyp46a1   | 91.0858 | -0.5149 | 0.25127 | -2.0491 | 0.04045  | 0.36231  | 112.359 | 106.807 | 102.285 | 83.7815 | 63.3921 | 77.8898 | Down |
| Evl       | 299.539 | 0.67465 | 0.32173 | 2.09693 | 0.036    | 0.33698  | 296.668 | 205.703 | 189.957 | 367.821 | 496.241 | 240.843 | Up   |
| Ankrd9    | 413.234 | -0.9089 | 0.19259 | -4.719  | 2.37E-06 | 0.00027  | 555.883 | 583.485 | 478.302 | 275.866 | 246.635 | 339.231 | Down |
| Gm48630   | 4.11344 | -3.5011 | 1.72077 | -2.0346 | 0.04189  | 0.36989  | 4.92804 | 15.8233 | 1.94828 | 0       | 1.981   | 0       | Down |
| Lbhd2     | 4.8504  | 3.78362 | 1.63127 | 2.31943 | 0.02037  | 0.24185  | 0       | 1.97792 | 0       | 10.2173 | 14.8575 | 2.04973 | Up   |
| Ckb       | 4102.98 | -0.7663 | 0.2745  | -2.7917 | 0.00524  | 0.09941  | 3427.95 | 6880.18 | 5195.08 | 2873.09 | 2566.39 | 3675.17 | Down |
| A530016L  | 60.6746 | -6.4871 | 1.10585 | -5.8662 | 4.46E-09 | 1.28E-06 | 55.1941 | 259.107 | 45.7845 | 0       | 3.962   | 0       | Down |
| Tmem179   | 29.799  | -5.4347 | 1.2137  | -4.4778 | 7.54E-06 | 0.0007   | 17.741  | 142.41  | 14.6121 | 0       | 1.981   | 2.04973 | Down |
| Igha      | 15455.3 | 3.39526 | 0.46092 | 7.36629 | 1.75E-13 | 1.05E-10 | 1273.41 | 4298.01 | 2477.23 | 34487.3 | 36634.7 | 13561   | Up   |
| Ighe      | 9.07334 | 4.74046 | 1.49207 | 3.1771  | 0.00149  | 0.04114  | 0.98561 | 0       | 0.97414 | 29.63   | 20.8005 | 2.04973 | Up   |
| Ighg2c    | 7911.55 | 6.90647 | 1.29732 | 5.32363 | 1.02E-07 | 1.93E-05 | 97.5753 | 239.328 | 55.5259 | 13510.3 | 32871.8 | 694.859 | Up   |
| Ighg2b    | 4169.45 | 5.03884 | 1.27246 | 3.95991 | 7.50E-05 | 0.00426  | 87.7192 | 266.03  | 384.785 | 6280.55 | 17577.4 | 420.195 | Up   |
| Ighg1     | 1352.19 | 5.92124 | 1.25664 | 4.71194 | 2.45E-06 | 0.00028  | 16.7553 | 65.2712 | 49.6811 | 3044.74 | 4817.8  | 118.884 | Up   |
| Ighg3     | 928.227 | 5.07528 | 1.03237 | 4.91616 | 8.83E-07 | 0.00012  | 114.331 | 21.7571 | 24.3535 | 1758.39 | 3191.39 | 459.14  | Up   |
| Ighm      | 28936.1 | 2.20886 | 1.04548 | 2.11276 | 0.03462  | 0.32907  | 17229.4 | 7714.86 | 5931.53 | 26059.1 | 107646  | 9036.24 | Up   |
| Ighv2-2   | 23.3048 | 2.37923 | 0.87654 | 2.71433 | 0.00664  | 0.11573  | 7.88487 | 2.96687 | 11.6897 | 36.7821 | 72.3066 | 8.19893 | Up   |
| Ighv5-4   | 17.9291 | 2.25239 | 1.14534 | 1.96657 | 0.04923  | 0.39755  | 9.85609 | 2.96687 | 5.84483 | 23.4997 | 64.3826 | 1.02487 | Up   |
| Ighv5-6   | 21.3884 | 3.30334 | 0.7851  | 4.20754 | 2.58E-05 | 0.00184  | 4.92804 | 4.94479 | 1.94828 | 34.7387 | 65.3731 | 16.3979 | Up   |
| Ighv5-9   | 35.5809 | 5.13519 | 2.02906 | 2.53082 | 0.01138  | 0.16459  | 2.95683 | 1.97792 | 0.97414 | 18.3911 | 189.186 | 0       | Up   |
| Ighv2-5   | 18.7247 | 3.38593 | 1.22676 | 2.76005 | 0.00578  | 0.10589  | 3.94243 | 0.98896 | 4.87069 | 1.02173 | 27.734  | 73.7903 | Up   |
| Ighv5-12  | 5.58854 | 4.01235 | 1.8683  | 2.14759 | 0.03175  | 0.31185  | 0       | 0       | 1.94828 | 27.5866 | 2.9715  | 1.02487 | Up   |
| Ighv2-9-1 | 26.2247 | 3.6213  | 1.05871 | 3.42048 | 0.00063  | 0.02243  | 3.94243 | 6.92271 | 0.97414 | 57.2166 | 84.1926 | 4.09946 | Up   |
| Ighv5-17  | 88.0201 | 3.31211 | 0.93695 | 3.535   | 0.00041  | 0.01622  | 11.8273 | 30.6577 | 5.84483 | 91.9553 | 371.438 | 16.3979 | Up   |
| Ighv3-1   | 10.031  | 4.88885 | 1.7051  | 2.86719 | 0.00414  | 0.08461  | 0       | 0.98896 | 0.97414 | 52.108  | 0.9905  | 5.12433 | Up   |
| Ighv14-2  | 156.143 | 5.46953 | 1.26692 | 4.31721 | 1.58E-05 | 0.00121  | 16.7553 | 1.97792 | 1.94828 | 588.514 | 274.369 | 53.293  | Up   |
| Ighv14-3  | 15.7769 | 2.67556 | 0.82712 | 3.23481 | 0.00122  | 0.03573  | 2.95683 | 8.90062 | 0.97414 | 16.3476 | 32.6865 | 32.7957 | Up   |
| Ighv9-3   | 64.0904 | 2.49376 | 0.68573 | 3.63664 | 0.00028  | 0.01205  | 25.6258 | 14.8344 | 17.5345 | 88.8901 | 209.986 | 27.6714 | Up   |
| Ighv14-4  | 16.5703 | 3.03528 | 1.11679 | 2.71787 | 0.00657  | 0.11517  | 4.92804 | 2.96687 | 2.92242 | 10.2173 | 74.2876 | 4.09946 | Up   |
| Ighv3-6   | 385.676 | 4.9637  | 1.16376 | 4.26524 | 2.00E-05 | 0.00146  | 28.5827 | 27.6908 | 15.5862 | 584.427 | 1608.57 | 49.1936 | Up   |
| Ighv13-2  | 30.865  | 4.93011 | 2.45882 | 2.00507 | 0.04496  | 0.38034  | 2.95683 | 0       | 2.92242 | 13.2824 | 0       | 166.028 | Up   |
| Ighv6-3   | 44.4408 | 2.49082 | 0.60152 | 4.14085 | 3.46E-05 | 0.00236  | 21.6834 | 5.93375 | 12.6638 | 68.4556 | 115.889 | 42.0195 | Up   |
| Ighv6-6   | 54.9118 | 1.64577 | 0.72189 | 2.2798  | 0.02262  | 0.25695  | 24.6402 | 40.5473 | 14.6121 | 169.606 | 55.468  | 24.5968 | Up   |
| Ighv1-4   | 16.8049 | 4.00617 | 0.9026  | 4.43849 | 9.06E-06 | 0.00078  | 2.95683 | 2.96687 | 0       | 40.869  | 37.639  | 16.3979 | Up   |
| Ighv1-7   | 17.9849 | 3.31629 | 0.9993  | 3.31861 | 0.0009   | 0.02938  | 1.97122 | 5.93375 | 1.94828 | 5.10863 | 38.6295 | 54.3179 | Up   |
| Ighv1-9   | 129.207 | 4.87291 | 0.6844  | 7.12001 | 1.08E-12 | 5.42E-10 | 15.7697 | 5.93375 | 3.89655 | 84.8032 | 451.668 | 213.172 | Up   |
| Ighv1-18  | 77.3868 | 3.64513 | 0.99451 | 3.66527 | 0.00025  | 0.01109  | 15.7697 | 5.93375 | 12.6638 | 92.977  | 330.827 | 6.1492  | Up   |
| Ighv1-19  | 44.3769 | 4.19746 | 0.6314  | 6.64787 | 2.97E-11 | 1.28E-08 | 2.95683 | 6.92271 | 3.89655 | 71.5208 | 130.746 | 50.2184 | Up   |
| Ighv1-22  | 20.0235 | 2.44455 | 0.71302 | 3.42842 | 0.00061  | 0.02196  | 6.89926 | 3.95583 | 7.79311 | 30.6518 | 55.468  | 15.373  | Up   |
| Ighv1-34  | 11.2944 | 4.02155 | 1.37343 | 2.9281  | 0.00341  | 0.07409  | 1.97122 | 0.98896 | 0.97414 | 13.2824 | 49.525  | 1.02487 | Up   |
| Ighv1-36  | 2.35332 | 4.70276 | 2.09898 | 2.2405  | 0.02506  | 0.27344  | 0       | 0       | 0       | 7.15208 | 5.94301 | 1.02487 | Up   |
| Ighv1-39  | 68.774  | 3.29809 | 1.49742 | 2.20252 | 0.02763  | 0.28707  | 2.95683 | 2.96687 | 32.1466 | 193.106 | 175.319 | 6.1492  | Up   |
| Ighv1-50  | 24.1204 | 3.14244 | 0.99768 | 3.14977 | 0.00163  | 0.04367  | 1.97122 | 5.93375 | 6.81897 | 34.7387 | 90.1356 | 5.12433 | Up   |
| Ighv1-52  | 71.3586 | 3.18664 | 0.90896 | 3.50581 | 0.00046  | 0.01765  | 23.6546 | 14.8344 | 3.89655 | 197.193 | 177.3   | 11.2735 | Up   |
| Ighv1-53  | 381.159 | 4.43477 | 1.27325 | 3.48303 | 0.0005   | 0.01885  | 19.7122 | 33.6246 | 47.7328 | 165.52  | 1939.4  | 80.9644 | Up   |
| Ighv1-55  | 156.417 | 3.30277 | 1.18554 | 2.78588 | 0.00534  | 0.10063  | 37.4531 | 12.8565 | 36.0431 | 283.018 | 551.709 | 17.4227 | Up   |
| Ighv8-8   | 71.5612 | 3.56384 | 0.66548 | 5.35527 | 8.54E-08 | 1.63E-05 | 21.6834 | 7.91166 | 3.89655 | 69.4773 | 104.003 | 222.396 | Up   |
| Ighv1-59  | 32.863  | 2.94719 | 1.1538  | 2.55434 | 0.01064  | 0.15715  | 17.741  | 1.97792 | 2.92242 | 34.7387 | 135.699 | 4.09946 | Up   |
| Ighv1-61  | 8.04534 | 3.49545 | 1.24289 | 2.81235 | 0.00492  | 0.095    | 1.97122 | 0.98896 | 0.97414 | 22.478  | 19.81   | 2.04973 | Up   |
| Ighv1-62  | 17.0738 | 3.59168 | 1.4046  | 2.55708 | 0.01056  | 0.15671  | 1.97122 | 1.97792 | 3.89655 | 16.3476 | 78.2496 | 0       | Up   |
| Ighv1-64  | 217.37  | 4.02235 | 0.36378 | 11.0572 | 2.02E-28 | 3.36E-25 | 17.741  | 23.735  | 34.0948 | 562.971 | 368.466 | 297.211 | Up   |
| Ighv1-69  | 45.9783 | 2.16898 | 0.82998 | 2.6133  | 0.00897  | 0.14073  | 23.6546 | 16.8123 | 9.74139 | 15.3259 | 170.366 | 39.9698 | Up   |
| Ighv8-12  | 35.1862 | 1.72032 | 0.60573 | 2.84007 | 0.00451  | 0.09019  | 27.597  | 9.88958 | 11.6897 | 45.9776 | 84.1926 | 31.7708 | Up   |
| Ighv1-75  | 54.9999 | 3.76621 | 0.9786  | 3.84855 | 0.00012  | 0.00618  | 4.92804 | 8.90062 | 8.76725 | 69.4773 | 231.777 | 6.1492  | Up   |
| Ighv1-74  | 28.5739 | 3.30896 | 0.94031 | 3.519   | 0.00043  | 0.01692  | 3.94243 | 4.94479 | 6.81897 | 123.629 | 19.81   | 12.2984 | Up   |
| Ighv1-75  | 25.8452 | 3.0459  | 1.13789 | 2.67678 | 0.00743  | 0.12367  | 9.85609 | 5.93375 | 0.97414 | 8.1738  | 118.86  | 11.2735 | Up   |
| Ighv1-76  | 69.9876 | 2.50752 | 0.6132  | 4.08924 | 4.33E-05 | 0.00281  | 19.7122 | 13.8454 | 29.2242 | 223.758 | 84.1926 | 49.1936 | Up   |
| Ighv1-78  | 27.4119 | 2.80355 | 0.92312 | 3.03704 | 0.00239  | 0.05726  | 10.8417 | 0.98896 | 8.76725 | 91.9553 | 39.62   | 12.2984 | Up   |
| Ighv1-80  | 108.931 | 3.96308 | 0.85119 | 4.65594 | 3.23E-06 | 0.00035  | 26.6114 | 7.91166 | 4.87069 | 331.039 | 257.53  | 25.6216 | Up   |
| Ighv1-81  | 405.569 | 6.55497 | 1.54912 | 4.23143 | 2.32E-05 | 0.00167  | 7.88487 | 12.8565 | 4.87069 | 204.345 | 2186.04 | 17.4227 | Up   |
| Ighv1-82  | 163.382 | 3.74733 | 1.2088  | 3.10003 | 0.00194  | 0.04951  | 43.3668 | 14.8344 | 9.74139 | 466.928 | 424.925 | 20.4973 | Up   |
| Gm9260    | 86.5572 | -4.06   | 0.53802 | -7.5462 | 4.48E-14 | 3.12E-11 | 77.8631 | 196.803 | 215.285 | 6.13035 | 8.91451 | 14.3481 | Down |
| Vipr2     | 1424.68 | -0.5811 | 0.23236 | -2.5007 | 0.01239  | 0.17252  | 1582.89 | 1727.71 | 1812.87 | 1056.46 | 1515.47 | 852.688 | Down |
| Ncapg2    | 357.754 | 0.56773 | 0.27728 | 2.04754 | 0.0406   | 0.36253  | 309.481 | 266.03  | 289.319 | 477.146 | 530.908 | 273.639 | Up   |
| Ptpnr2    | 219.217 | -0.7666 | 0.31465 | -2.4363 | 0.01484  | 0.19554  | 208.949 | 378.771 | 240.612 | 150.194 | 129.756 | 207.023 | Down |
| Gm5441    | 200.548 | -0.8668 | 0.4271  | -2.0296 | 0.0424   | 0.37174  | 172.482 | 435.142 | 169.5   | 128.737 | 111.927 | 185.501 | Down |
| Cdca7l    | 359.393 | 0.50121 | 0.24934 | 2.01016 | 0.04441  | 0.37851  | 350.877 | 283.831 | 258.147 | 414.82  | 528.927 | 319.758 | Up   |
| Calml3    | 534.552 | -2.6594 | 1.18517 | -2.2439 | 0.02484  | 0.27245  | 199.093 | 2283.5  | 286.397 | 89.9118 | 60.4206 | 287.987 | Down |
| Gm46401   | 18.6656 | 1.61747 | 0.6647  | 2.4334  | 0.01496  | 0.19658  | 4.92804 | 11.8675 | 10.7155 | 32.6952 | 13.867  | 37.92   | Up   |
| Idi2      | 3.2282  | 5.15736 | 1.90264 | 2.71064 | 0.00672  | 0.11632  | 0       | 0       | 0       | 11.239  | 1.981   | 6.1492  | Up   |
| Gm24187   | 9.63565 | 2.28222 | 1.15841 | 1.97013 | 0.04882  | 0.3      |         |         |         |         |         |         |      |



|          |         |         |         |         |          |          |         |         |         |         |         |         |      |
|----------|---------|---------|---------|---------|----------|----------|---------|---------|---------|---------|---------|---------|------|
| Gm8108   | 12.1595 | -5.1275 | 1.26698 | -4.047  | 5.19E-05 | 0.00326  | 24.6402 | 32.6356 | 13.6379 | 2.04345 | 0       | 0       | Down |
| Gm2974   | 12.6526 | -3.5202 | 0.91249 | -3.8578 | 0.00011  | 0.006    | 13.7985 | 32.6356 | 23.3793 | 4.0869  | 0.9905  | 1.02487 | Down |
| Gm3173   | 9.5026  | -3.7069 | 1.16029 | -3.1948 | 0.0014   | 0.0396   | 6.89926 | 17.8012 | 28.25   | 0       | 0.9905  | 3.0746  | Down |
| Gm3239   | 3.44159 | -5.2081 | 2.42223 | -2.1501 | 0.03154  | 0.3109   | 0       | 12.8565 | 7.79311 | 0       | 0       | 0       | Down |
| Gm3252   | 16.0432 | -5.5424 | 1.18453 | -4.679  | 2.88E-06 | 0.00032  | 20.6978 | 32.6356 | 40.9138 | 1.02173 | 0.9905  | 0       | Down |
| Gm26650  | 2.47065 | -3.6643 | 1.82161 | -2.0116 | 0.04427  | 0.37773  | 4.92804 | 6.92271 | 1.94828 | 0       | 0       | 1.02487 | Down |
| Gm3194   | 4.91812 | -4.7121 | 1.60417 | -2.9374 | 0.00331  | 0.07278  | 3.94243 | 14.8344 | 9.74139 | 0       | 0.9905  | 0       | Down |
| Gm3453   | 3.28194 | -5.1394 | 1.80927 | -2.8406 | 0.0045   | 0.09015  | 3.94243 | 10.8785 | 4.87069 | 0       | 0       | 0       | Down |
| Gm3411   | 16.1376 | -2.9368 | 0.78683 | -3.7324 | 0.00019  | 0.00908  | 18.7266 | 42.5252 | 24.3535 | 6.13035 | 0.9905  | 4.09946 | Down |
| Gm26630  | 3.93575 | -5.4016 | 1.70531 | -3.1675 | 0.00154  | 0.04219  | 4.92804 | 11.8675 | 6.81897 | 0       | 0       | 0       | Down |
| Gm3667   | 13.3484 | -2.2113 | 0.73891 | -2.9927 | 0.00277  | 0.06326  | 15.7697 | 25.7129 | 24.3535 | 8.1738  | 1.981   | 4.09946 | Down |
| Gm10406  | 17.9366 | -3.2708 | 0.97077 | -3.3693 | 0.00075  | 0.02551  | 15.7697 | 60.3264 | 21.431  | 6.13035 | 3.962   | 0       | Down |
| Gm3696   | 9.05137 | -2.3141 | 0.86813 | -2.6656 | 0.00768  | 0.12697  | 7.88487 | 21.7571 | 15.5862 | 2.04345 | 3.962   | 3.0746  | Down |
| Gm3739   | 44.8163 | -2.0647 | 0.59562 | -3.4665 | 0.00053  | 0.0198   | 32.5251 | 87.0283 | 97.4139 | 20.4345 | 7.92401 | 23.5719 | Down |
| Pxk      | 4758.13 | 0.36336 | 0.12881 | 2.82088 | 0.00479  | 0.09326  | 4457.91 | 4004.29 | 4024.17 | 5318.08 | 5889.52 | 4854.79 | Up   |
| Oit1     | 193.845 | -2.5564 | 0.65578 | -3.8983 | 9.69E-05 | 0.00526  | 96.5897 | 735.785 | 161.707 | 67.4339 | 56.4585 | 45.0941 | Down |
| 4930452B | 424.865 | -1.0203 | 0.23866 | -4.2752 | 1.91E-05 | 0.0014   | 473.092 | 716.006 | 518.242 | 299.366 | 226.825 | 315.659 | Down |
| 4930455B | 7.53412 | -6.3386 | 1.43845 | -4.4065 | 1.05E-05 | 0.00086  | 14.7841 | 14.8344 | 15.5862 | 0       | 0       | 0       | Down |
| Ptprg    | 7307.08 | 0.39022 | 0.18545 | 2.1042  | 0.03536  | 0.33334  | 5842.69 | 6732.83 | 6399.12 | 9336.53 | 9143.31 | 6387.99 | Up   |
| Gm49355  | 247.103 | -0.4911 | 0.19049 | -2.5784 | 0.00993  | 0.15089  | 279.913 | 254.162 | 332.181 | 217.628 | 205.034 | 193.7   | Down |
| Gm5087   | 13.8726 | 4.33101 | 1.31023 | 3.30554 | 0.00095  | 0.03031  | 1.97122 | 1.97792 | 0       | 31.6735 | 45.563  | 2.04973 | Up   |
| Sntn     | 2760.85 | -0.8106 | 0.40896 | -1.9821 | 0.04747  | 0.39055  | 3073.13 | 4111.1  | 3365.65 | 1841.15 | 862.726 | 3311.34 | Down |
| Lrrc3b   | 80.7526 | -3.3012 | 0.63791 | -5.1749 | 2.28E-07 | 3.88E-05 | 92.6472 | 288.776 | 58.4483 | 12.2607 | 11.886  | 20.4973 | Down |
| Gm21738  | 24.0413 | 2.83732 | 1.04743 | 2.70884 | 0.00675  | 0.11674  | 6.89926 | 5.93375 | 4.87069 | 108.303 | 5.94301 | 12.2984 | Up   |
| Nid2     | 521.249 | -0.6548 | 0.30836 | -2.1235 | 0.03371  | 0.32401  | 557.855 | 772.376 | 582.535 | 421.973 | 545.766 | 246.993 | Down |
| Anxa7    | 11183.3 | 0.22111 | 0.08649 | 2.55642 | 0.01058  | 0.15675  | 10545   | 9978.59 | 10460.3 | 12242.3 | 11802.8 | 12070.9 | Up   |
| Synpo2l  | 288.508 | -3.4528 | 1.01366 | -3.4063 | 0.00066  | 0.02324  | 310.467 | 1016.65 | 259.121 | 15.3259 | 107.965 | 21.5222 | Down |
| Plau     | 524.866 | 0.53795 | 0.1778  | 3.02563 | 0.00248  | 0.05888  | 367.632 | 465.799 | 451.026 | 609.97  | 699.294 | 555.477 | Up   |
| Zfp503   | 3278.31 | 0.28705 | 0.14136 | 2.03065 | 0.04229  | 0.37149  | 3079.04 | 2801.72 | 2978.92 | 4123.68 | 3448.92 | 3237.55 | Up   |
| Kcnma1   | 122.312 | -0.7256 | 0.36842 | -1.9696 | 0.04888  | 0.39608  | 106.446 | 206.692 | 144.173 | 65.3904 | 87.1641 | 124.009 | Down |
| Gm34059  | 357.523 | -1.4459 | 0.40839 | -3.5406 | 0.0004   | 0.01603  | 361.718 | 741.719 | 465.638 | 219.671 | 96.0786 | 260.316 | Down |
| Asb14    | 994.77  | -0.7166 | 0.3038  | -2.3588 | 0.01834  | 0.22562  | 988.566 | 1574.42 | 1147.54 | 672.295 | 521.994 | 1063.81 | Down |
| Cacna2d3 | 156.32  | -0.9074 | 0.46279 | -1.9608 | 0.0409   | 0.39986  | 148.827 | 343.168 | 119.819 | 127.716 | 130.746 | 67.6411 | Down |
| Chdh     | 196.249 | -0.5709 | 0.2646  | -2.1574 | 0.03098  | 0.30783  | 176.424 | 284.82  | 242.561 | 145.085 | 188.195 | 140.407 | Down |
| Cacna1d  | 1505.79 | -0.3985 | 0.18809 | -2.1188 | 0.03411  | 0.32547  | 1410.41 | 1754.41 | 1972.63 | 1258.77 | 1491.69 | 1146.82 | Down |
| Prkcd    | 6941.85 | 0.33108 | 0.15591 | 2.12353 | 0.03371  | 0.32401  | 6206.38 | 5723.1  | 6516.99 | 7542.38 | 9002.66 | 6659.58 | Up   |
| Itih4    | 5038.02 | 1.08189 | 0.34273 | 3.15666 | 0.0016   | 0.04292  | 3330.37 | 4042.86 | 2325.27 | 6644.28 | 9941.66 | 3943.68 | Up   |
| Itih1    | 136.345 | 0.74109 | 0.30971 | 2.39285 | 0.01672  | 0.21274  | 106.446 | 71.205  | 128.586 | 147.128 | 210.977 | 153.73  | Up   |
| Colq     | 1564.09 | -0.628  | 0.2181  | -2.8796 | 0.00398  | 0.08243  | 1684.41 | 2138.13 | 1875.22 | 1579.59 | 1120.26 | 986.946 | Down |
| Ogdhl    | 92.894  | -1.764  | 0.60553 | -2.9132 | 0.00358  | 0.0759   | 52.2373 | 284.82  | 93.5173 | 37.8038 | 34.6675 | 54.3179 | Down |
| Tmem273  | 253.486 | 0.80583 | 0.30654 | 2.62884 | 0.00857  | 0.13624  | 195.151 | 186.913 | 171.448 | 314.691 | 446.716 | 205.998 | Up   |
| Ptpn20   | 124.292 | -0.9226 | 0.44432 | -2.0763 | 0.03786  | 0.34778  | 147.841 | 215.593 | 124.69  | 92.977  | 39.62   | 125.034 | Down |
| Sncg     | 574.922 | -1.2424 | 0.31071 | -3.9986 | 6.37E-05 | 0.00379  | 796.372 | 1073.02 | 555.259 | 298.344 | 268.426 | 458.115 | Down |
| Ldb3     | 1925.98 | -3.4514 | 0.80315 | -4.2973 | 1.73E-05 | 0.0013   | 2106.25 | 6628.99 | 1852.81 | 161.433 | 595.291 | 211.122 | Down |
| Cdhr1    | 199.667 | -3.6048 | 1.06492 | -3.385  | 0.00071  | 0.02459  | 211.906 | 774.354 | 120.793 | 15.3259 | 65.3731 | 10.2487 | Down |
| 2610528A | 11.0257 | 1.56463 | 0.69941 | 2.23705 | 0.02528  | 0.27483  | 6.89926 | 5.93375 | 3.89655 | 12.2607 | 21.791  | 15.373  | Up   |
| Tspan14  | 4704.08 | 0.27675 | 0.10247 | 2.70075 | 0.00692  | 0.11842  | 4125.76 | 4119.01 | 4518.05 | 5135.19 | 5348.7  | 4977.77 | Up   |
| Sftpa1   | 183393  | 0.53062 | 0.16702 | 3.17707 | 0.00149  | 0.04114  | 181746  | 129541  | 138839  | 206646  | 229324  | 214261  | Up   |
| Mbl1     | 176.931 | 0.56951 | 0.22646 | 2.51488 | 0.01191  | 0.16878  | 114.331 | 148.344 | 164.629 | 222.736 | 190.176 | 221.371 | Up   |
| Sftpd    | 47624.7 | 0.78154 | 0.20245 | 3.8604  | 0.00011  | 0.00595  | 43441.7 | 29033.8 | 32619   | 55696.3 | 70526.6 | 54430.6 | Up   |
| Gm8113   | 152.639 | 0.71232 | 0.27484 | 2.59174 | 0.00955  | 0.14667  | 138.971 | 106.807 | 101.31  | 241.127 | 157.49  | 170.128 | Up   |
| 4930503E | 42.4468 | 1.88965 | 0.70149 | 2.69377 | 0.00706  | 0.12013  | 36.4675 | 7.91166 | 9.74139 | 66.4121 | 32.6865 | 101.462 | Up   |
| Gm5930   | 336.079 | 2.06861 | 0.57323 | 3.6087  | 0.00031  | 0.01308  | 252.316 | 95.9289 | 39.9397 | 447.516 | 380.352 | 800.42  | Up   |
| Gm8229   | 382.746 | 2.25989 | 0.59142 | 3.8211  | 0.00013  | 0.00675  | 259.215 | 71.205  | 66.2414 | 426.059 | 354.599 | 1119.15 | Up   |
| AC160336 | 1436.42 | 0.9905  | 0.35779 | 2.7684  | 0.00563  | 0.10469  | 1460.67 | 623.044 | 801.716 | 1545.87 | 1518.44 | 2668.75 | Up   |
| Gm15218  | 8.08512 | -1.7445 | 0.86155 | -2.0248 | 0.04289  | 0.37291  | 5.91365 | 17.8012 | 13.6379 | 4.0869  | 2.9715  | 4.09946 | Down |
| Cdkn3    | 74.9974 | 1.09446 | 0.3505  | 3.12309 | 0.00179  | 0.0469   | 37.4531 | 57.3596 | 48.7069 | 127.716 | 105.984 | 72.7655 | Up   |
| Gm34934  | 241.091 | -0.3907 | 0.18601 | -2.1006 | 0.03568  | 0.33513  | 244.431 | 287.787 | 288.345 | 232.953 | 192.157 | 200.874 | Down |
| Lgals3   | 8697.52 | 0.38708 | 0.19155 | 2.02076 | 0.0433   | 0.3735   | 9557.45 | 6519.21 | 6536.47 | 9992.47 | 10383.4 | 9196.12 | Up   |
| Dlgap5   | 105.529 | 0.83661 | 0.3946  | 2.12015 | 0.03399  | 0.32506  | 85.748  | 87.0283 | 54.5518 | 167.563 | 162.442 | 75.8401 | Up   |
| Tlr11    | 74.9553 | 1.71089 | 0.52507 | 3.25843 | 0.00112  | 0.03374  | 42.3812 | 36.5914 | 26.3017 | 98.0856 | 195.129 | 51.2433 | Up   |
| Rnase6   | 686.292 | 0.65445 | 0.30315 | 2.15882 | 0.03086  | 0.30729  | 693.869 | 455.91  | 450.052 | 700.904 | 1183.65 | 633.367 | Up   |
| Gm7247   | 11.8482 | 1.70457 | 0.75267 | 2.2647  | 0.02353  | 0.26285  | 7.88487 | 2.96687 | 5.84483 | 18.3911 | 25.753  | 10.2487 | Up   |
| Ndrp2    | 6020.56 | -0.726  | 0.23729 | -3.0595 | 0.00222  | 0.05418  | 6894.33 | 9553.34 | 6064.99 | 4828.67 | 5289.27 | 3492.74 | Down |
| Rab2b    | 143.48  | -0.4265 | 0.21525 | -1.9814 | 0.04755  | 0.39072  | 186.28  | 164.167 | 143.198 | 117.498 | 127.775 | 121.959 | Down |
| Rps19-ps | 17.3038 | -1.2183 | 0.6082  | -2.0031 | 0.04517  | 0.38075  | 23.6546 | 19.7792 | 29.2242 | 7.15208 | 16.8385 | 7.17406 | Down |
| Trac     | 634.213 | 0.8253  | 0.28258 | 2.92054 | 0.00349  | 0.07481  | 512.517 | 401.517 | 458.819 | 930.792 | 998.425 | 503.209 | Up   |
| Gm43305  | 415.855 | 6.38234 | 0.5572  | 11.4543 | 2.24E-30 | 4.03E-27 | 7.88487 | 18.7902 | 2.92242 | 629.383 | 1341.14 | 495.01  | Up   |
| Haus4    | 532.192 | 0.28638 | 0.14552 | 1.96798 | 0.04907  | 0.39703  | 503.646 | 443.053 | 491.94  | 623.252 | 596.282 | 534.98  | Up   |
| Ajuba    | 2411.67 | -0.28   | 0.12605 | -2.2212 | 0.02634  | 0.28071  | 2607.92 | 2480.31 | 2846.43 | 2218.17 | 1995.86 | 2321.32 | Down |
| Gm49130  | 1.80648 | -4.2779 | 2.13678 | -2.002  | 0.04528  | NA       | 2.95683 | 5.93375 | 1.94828 | 0       | 0       | 0       | Down |
| Myh6     | 16812.7 | -3.9003 | 1.87937 | -2.0753 | 0.03796  | 0.34837  | 21352.2 | 55484.5 | 17707.9 | 21.4562 | 6254.02 | 56.3676 | Down |
| Mhrt     | 46.6484 | -5.0886 | 1.03465 | -4.9182 | 8.74E-07 | 0.00012  | 50.266  | 168.123 | 53.5776 | 0       | 7.92401 | 0       | Down |
| Myh7     | 326.486 | -1.4501 | 0.39597 | -3.6621 | 0.00025  | 0.01116  | 318.352 | 800.067 | 315.621 | 154.281 | 159.471 | 211.122 | Down |
| Pck2     | 2556.06 | 0.21892 | 0.09934 | 2.20372 | 0.02754  | 0.28707  | 2422.63 | 2325.04 | 2339.88 | 2610.51 | 2820.95 | 2817.36 | Up   |
| Fitm1    | 59.2238 | -3.0127 | 0.6766  | -4.4528 | 8.48E-06 | 0.00075  | 95.604  | 162.189 | 58.4483 | 3.06518 | 24.7625 | 11.2735 | Down |
| Psme1    | 7313.35 | 0.26503 | 0.09864 | 2.68694 | 0.00721  | 0.12156  | 6730.72 | 6372.85 | 6826.76 | 7876.48 | 7670.44 | 8402.88 | Up   |
| Psme2    | 4102.62 | 0.23489 | 0.08693 | 2.70223 | 0.00689  | 0.11825  | 376     |         |         |         |         |         |      |

|           |         |         |         |         |          |          |         |         |         |         |         |         |      |
|-----------|---------|---------|---------|---------|----------|----------|---------|---------|---------|---------|---------|---------|------|
| Ska3      | 98.5413 | 1.104   | 0.24599 | 4.48803 | 7.19E-06 | 0.00068  | 55.1941 | 70.216  | 62.3449 | 133.846 | 144.613 | 125.034 | Up   |
| 3110083C  | 90.5505 | -0.6797 | 0.31133 | -2.1831 | 0.02903  | 0.29524  | 113.345 | 128.565 | 92.5432 | 57.2166 | 60.4206 | 91.2131 | Down |
| Phf11a    | 113.146 | 0.89035 | 0.38118 | 2.33575 | 0.0195   | 0.23543  | 78.8487 | 87.0283 | 72.0863 | 136.911 | 217.91  | 86.0887 | Up   |
| Phf11b    | 797.929 | 0.54621 | 0.27288 | 2.00165 | 0.04532  | 0.38132  | 570.667 | 775.343 | 600.069 | 932.835 | 1259.92 | 648.74  | Up   |
| Shisa2    | 418.984 | -0.7161 | 0.32164 | -2.2264 | 0.02599  | 0.27879  | 660.358 | 464.81  | 437.388 | 308.561 | 201.072 | 441.717 | Down |
| Atp8a2    | 126.566 | -0.6915 | 0.33079 | -2.0906 | 0.03657  | 0.34009  | 116.302 | 199.77  | 152.94  | 68.4556 | 102.022 | 119.909 | Down |
| Tnfrsf19  | 2400.59 | -0.2972 | 0.14536 | -2.0449 | 0.04087  | 0.36391  | 2304.35 | 2888.75 | 2748.04 | 1988.28 | 2316.78 | 2157.34 | Down |
| Sgcg      | 35.637  | -2.3837 | 0.67135 | -3.5506 | 0.00038  | 0.01558  | 36.4675 | 115.708 | 27.2759 | 9.19553 | 12.8765 | 12.2984 | Down |
| Dleu2     | 1720.01 | -0.5212 | 0.13389 | -3.8931 | 9.90E-05 | 0.00534  | 1849.99 | 2176.7  | 2055.43 | 1542.81 | 1366.89 | 1328.23 | Down |
| Gata4     | 202.997 | -2.8525 | 0.68769 | -4.1479 | 3.36E-05 | 0.00231  | 264.143 | 662.602 | 143.198 | 22.478  | 103.012 | 22.547  | Down |
| Gm49390   | 7.3979  | -6.3119 | 1.65661 | -3.8101 | 0.00014  | 0.00698  | 7.88487 | 30.6577 | 5.84483 | 0       | 0       | 0       | Down |
| Gm5463    | 5.58975 | -5.9075 | 1.71262 | -3.4494 | 0.00056  | 0.02074  | 7.88487 | 21.7571 | 3.89655 | 0       | 0       | 0       | Down |
| Nuggc     | 14.6741 | 2.31289 | 0.80479 | 2.87391 | 0.00405  | 0.08338  | 5.91365 | 5.93375 | 2.92242 | 20.4345 | 42.5915 | 10.2487 | Up   |
| Scara5    | 798.307 | -1.2219 | 0.30763 | -3.9719 | 7.13E-05 | 0.00411  | 999.407 | 1605.08 | 748.138 | 490.428 | 566.566 | 380.225 | Down |
| Pbk       | 139.557 | 1.99281 | 0.38554 | 5.16889 | 2.35E-07 | 3.91E-05 | 53.2229 | 63.2933 | 51.6293 | 332.061 | 208.005 | 129.133 | Up   |
| Esco2     | 97.1735 | 1.25389 | 0.47924 | 2.61643 | 0.00889  | 0.14016  | 55.1941 | 78.1277 | 38.9655 | 181.867 | 167.395 | 61.492  | Up   |
| Scara3    | 473.462 | -1.7293 | 0.27414 | -6.308  | 2.83E-10 | 1.05E-07 | 510.545 | 996.87  | 675.078 | 240.105 | 206.024 | 212.147 | Down |
| Ephx2     | 502.13  | -2.1022 | 0.4287  | -4.9037 | 9.41E-07 | 0.00013  | 556.869 | 1426.08 | 460.768 | 164.498 | 243.663 | 160.904 | Down |
| Ptk2b     | 1888.29 | 0.6547  | 0.26507 | 2.46994 | 0.01351  | 0.18348  | 1827.32 | 1380.59 | 1193.32 | 2260.06 | 3007.16 | 1661.31 | Up   |
| Adra1a    | 1602.09 | -0.8458 | 0.20589 | -4.1082 | 3.99E-05 | 0.00262  | 1662.72 | 2300.32 | 2213.24 | 1041.14 | 1388.68 | 1006.42 | Down |
| Cdca2     | 127.062 | 1.25452 | 0.31893 | 3.93352 | 8.37E-05 | 0.00467  | 78.8487 | 79.1166 | 67.2156 | 236.019 | 181.262 | 119.909 | Up   |
| Dock5     | 1849.89 | 0.40336 | 0.20547 | 1.96315 | 0.04963  | 0.39975  | 1785.92 | 1529.92 | 1463.16 | 2191.6  | 2522.81 | 1605.96 | Up   |
| Entpd4b   | 63.9472 | 1.63924 | 0.76641 | 2.13884 | 0.03245  | 0.31621  | 15.7697 | 34.6135 | 42.8621 | 14.3042 | 164.423 | 111.71  | Up   |
| Phyhip    | 47.9315 | -1.9748 | 0.5883  | -3.3567 | 0.00079  | 0.02637  | 81.8055 | 93.951  | 53.5776 | 6.13035 | 33.677  | 18.4476 | Down |
| Hr        | 595.973 | 0.69294 | 0.34852 | 1.98826 | 0.04678  | 0.38737  | 281.884 | 550.85  | 533.828 | 1041.14 | 508.127 | 660.014 | Up   |
| Gm41206   | 2.38144 | 4.71832 | 2.10942 | 2.23678 | 0.0253   | 0.27483  | 0       | 0       | 0       | 8.1738  | 0.9905  | 5.12433 | Up   |
| Cyslstr2  | 221.222 | 0.73303 | 0.2567  | 2.85552 | 0.0043   | 0.08671  | 154.741 | 200.758 | 143.198 | 255.431 | 345.685 | 227.52  | Up   |
| Sucla2    | 5151.97 | -0.3404 | 0.16337 | -2.0834 | 0.03721  | 0.34382  | 5200.07 | 6891.06 | 5179.49 | 4659.07 | 4218.54 | 4763.58 | Down |
| Lcp1      | 11686.9 | 0.7114  | 0.26859 | 2.64861 | 0.00808  | 0.13094  | 11013.2 | 8182.64 | 7391.76 | 13046.4 | 19827.8 | 10659.6 | Up   |
| Epsti1    | 1101.3  | 0.67578 | 0.24468 | 2.76195 | 0.00575  | 0.10587  | 837.767 | 1014.67 | 691.638 | 1259.79 | 1745.26 | 1058.69 | Up   |
| Tnfrsf11  | 35.6594 | 1.61539 | 0.67664 | 2.15978 | 0.03079  | 0.30698  | 9.85609 | 26.7019 | 20.4569 | 61.3035 | 79.2401 | 16.3979 | Up   |
| Kbtbd6    | 17.2439 | 1.60504 | 0.77866 | 2.06129 | 0.03928  | 0.35682  | 8.87048 | 11.8675 | 4.87069 | 42.9125 | 26.7435 | 8.19893 | Up   |
| Rps3a2    | 4915.03 | -4.4495 | 0.22891 | -19.438 | 3.69E-84 | 2.66E-80 | 9293.3  | 8127.26 | 10778.8 | 352.495 | 368.466 | 569.825 | Down |
| Acod1     | 66.7588 | 2.67888 | 0.83949 | 3.19107 | 0.00142  | 0.03994  | 23.6546 | 17.8012 | 12.6638 | 73.5642 | 258.521 | 14.3481 | Up   |
| Gm34907   | 293.618 | 0.68428 | 0.30754 | 2.22503 | 0.02608  | 0.27935  | 309.481 | 199.77  | 166.578 | 429.125 | 389.267 | 267.49  | Up   |
| Scel      | 3687.93 | 0.66973 | 0.32547 | 2.05771 | 0.03962  | 0.35889  | 4164.2  | 1683.21 | 2693.49 | 5666.49 | 4045.21 | 3875.02 | Up   |
| Tpm3-rs7  | 8503.87 | -3.0526 | 0.17674 | -17.271 | 7.72E-67 | 4.17E-63 | 14782.2 | 14539.7 | 16213.6 | 1661.33 | 2254.38 | 1572.14 | Down |
| Dct       | 6.2396  | -3.0347 | 1.2332  | -2.4609 | 0.01386  | 0.18672  | 3.94243 | 11.8675 | 17.5345 | 2.04345 | 0       | 2.04973 | Down |
| Sox21     | 107.972 | -4.3531 | 0.63942 | -6.8078 | 9.91E-12 | 4.55E-09 | 98.5609 | 382.727 | 136.379 | 10.2173 | 15.848  | 4.09946 | Down |
| Slc15a1   | 164.795 | 0.53342 | 0.26867 | 1.9854  | 0.0471   | 0.38896  | 175.438 | 104.83  | 123.716 | 212.519 | 170.366 | 201.899 | Up   |
| Fgf14     | 119.845 | -1.3165 | 0.34138 | -3.8564 | 0.00012  | 0.006    | 125.172 | 202.736 | 185.086 | 60.2818 | 51.506  | 94.2877 | Down |
| 5430437J  | 154.773 | 1.19418 | 0.34735 | 3.43801 | 0.00059  | 0.02146  | 123.201 | 97.9068 | 61.3707 | 233.975 | 260.502 | 151.68  | Up   |
| Il7r      | 1627.48 | 0.81151 | 0.24483 | 3.31463 | 0.00092  | 0.02962  | 1179.77 | 1066.1  | 1298.53 | 2261.08 | 2560.44 | 1398.94 | Up   |
| Adamts12  | 147.793 | -0.7519 | 0.37345 | -2.0135 | 0.04406  | 0.377    | 101.518 | 254.162 | 200.673 | 130.781 | 95.0881 | 104.536 | Down |
| Cdh12     | 6.70283 | 1.82639 | 0.8739  | 2.08992 | 0.03663  | 0.3402   | 2.95683 | 2.96687 | 2.92242 | 7.15208 | 10.8955 | 13.3233 | Up   |
| Gm6533    | 12.2966 | -2.651  | 0.99712 | -2.6586 | 0.00785  | 0.12826  | 19.7122 | 5.93375 | 37.9914 | 1.02173 | 2.9715  | 6.1492  | Down |
| Basp1     | 977.233 | -1.4975 | 0.42454 | -3.5275 | 0.00042  | 0.01654  | 722.451 | 2425.91 | 1181.63 | 388.256 | 698.303 | 446.842 | Down |
| Otulinl   | 2125.61 | 0.47946 | 0.23889 | 2.00706 | 0.04474  | 0.37966  | 1794.79 | 1881    | 1651.16 | 2576.79 | 3153.75 | 1696.15 | Up   |
| Osr2      | 22.3231 | -1.1035 | 0.54314 | -2.0318 | 0.04218  | 0.37132  | 17.741  | 39.5583 | 34.0948 | 17.3693 | 12.8765 | 12.2984 | Down |
| Pabpc1    | 22182.5 | 0.30364 | 0.13927 | 2.18027 | 0.02924  | 0.29698  | 22375.3 | 19478.5 | 17716.7 | 23868.5 | 26484   | 23172.2 | Up   |
| 11000011I | 22.2799 | -1.4669 | 0.54053 | -2.7137 | 0.00665  | 0.11573  | 30.5539 | 23.735  | 43.8362 | 13.2824 | 7.92401 | 14.3481 | Down |
| Lrp12     | 859.903 | 0.79924 | 0.38892 | 2.05506 | 0.03987  | 0.35961  | 881.134 | 546.894 | 454.923 | 894.01  | 1723.47 | 658.989 | Up   |
| AU02279C  | 147.356 | 1.74995 | 0.57212 | 3.0587  | 0.00222  | 0.05418  | 96.5897 | 57.3596 | 48.7069 | 214.562 | 396.2   | 70.7157 | Up   |
| Gm33251   | 3.69202 | 2.7045  | 1.35729 | 1.99258 | 0.04631  | 0.38491  | 1.97122 | 0       | 0.97414 | 8.1738  | 6.93351 | 4.09946 | Up   |
| Abra      | 149.957 | -1.9655 | 0.51982 | -3.7811 | 0.00016  | 0.00766  | 149.813 | 430.197 | 136.379 | 60.2818 | 86.1736 | 36.8952 | Down |
| Angpt1    | 5339.52 | -0.5007 | 0.1269  | -3.9457 | 7.96E-05 | 0.00449  | 6107.82 | 6572.62 | 6090.31 | 4677.46 | 4681.11 | 3907.81 | Down |
| Sybu      | 329.415 | -0.4907 | 0.19493 | -2.5172 | 0.01183  | 0.16816  | 369.603 | 447.998 | 337.052 | 272.801 | 244.654 | 304.385 | Down |
| Rpl15-psf | 371.616 | -3.8047 | 0.22189 | -17.147 | 6.64E-66 | 2.87E-62 | 676.128 | 772.376 | 632.216 | 42.9125 | 44.5725 | 61.492  | Down |
| Ccn3      | 805.202 | -1.1474 | 0.35135 | -3.2658 | 0.00109  | 0.03316  | 710.624 | 1520.03 | 1097.85 | 462.842 | 335.78  | 704.083 | Down |
| Tbcl1d31  | 554.316 | 0.31696 | 0.1452  | 2.18296 | 0.02904  | 0.29524  | 527.301 | 452.943 | 500.707 | 666.165 | 585.386 | 593.397 | Up   |
| Atad2     | 1193.92 | 0.51787 | 0.22187 | 2.3341  | 0.01959  | 0.236    | 1203.43 | 886.106 | 856.268 | 1561.2  | 1563.01 | 1093.53 | Up   |
| Myc       | 603.216 | 0.3664  | 0.14365 | 2.55063 | 0.01075  | 0.15803  | 547.998 | 493.49  | 539.673 | 654.926 | 748.819 | 634.392 | Up   |
| Pvt1      | 224.376 | 0.61516 | 0.26185 | 2.34926 | 0.01881  | 0.2295   | 204.021 | 161.2   | 166.578 | 314.691 | 306.065 | 193.7   | Up   |
| Fam49b    | 3827.77 | 0.32335 | 0.15717 | 2.0573  | 0.03966  | 0.35901  | 3452.59 | 3545.41 | 3203.94 | 4372.98 | 4842.56 | 3549.11 | Up   |
| Gm7859    | 17.6797 | -6.5935 | 1.36994 | -4.813  | 1.49E-06 | 0.00018  | 15.7697 | 42.5252 | 46.7587 | 0       | 0       | 1.02487 | Down |
| Khdrbs3   | 1307.36 | -0.3613 | 0.15527 | -2.327  | 0.01996  | 0.23859  | 1301    | 1702    | 1407.63 | 1161.7  | 1071.72 | 1200.12 | Down |
| Lypd2     | 1753.81 | -1.3733 | 0.43881 | -3.1297 | 0.00175  | 0.04609  | 1531.64 | 3993.41 | 2067.12 | 1002.31 | 485.345 | 1443.01 | Down |
| Lynx1     | 1968.84 | -0.7156 | 0.22244 | -3.2171 | 0.00129  | 0.03729  | 2314.21 | 2947.1  | 2080.76 | 1271.03 | 1319.35 | 1880.63 | Down |
| Gm17189   | 272.445 | -0.7846 | 0.26709 | -2.9377 | 0.00331  | 0.07278  | 272.028 | 425.252 | 337.052 | 150.194 | 229.796 | 220.346 | Down |
| Ly6m      | 142.873 | -1.3448 | 0.47973 | -2.8032 | 0.00506  | 0.09677  | 157.697 | 289.765 | 167.552 | 58.2383 | 43.582  | 140.407 | Down |
| Ly6e      | 54350.1 | 0.39475 | 0.08847 | 4.46206 | 8.12E-06 | 0.00073  | 47805   | 46591.8 | 46484.9 | 61388.3 | 64417.2 | 59413.5 | Up   |
| Ly6i      | 670.401 | 3.2229  | 0.54334 | 5.9316  | 3.00E-09 | 9.53E-07 | 121.23  | 132.52  | 135.405 | 816.359 | 2435.64 | 381.25  | Up   |
| Ly6a      | 39649.9 | 0.36531 | 0.14204 | 2.57182 | 0.01012  | 0.15256  | 34423.4 | 35551.1 | 33995.5 | 43090.2 | 51634.8 | 39204.2 | Up   |
| Ly6c2     | 1288.09 | 1.21599 | 0.39426 | 3.0842  | 0.00204  | 0.05154  | 880.149 | 850.504 | 595.199 | 1559.15 | 2945.75 | 897.782 | Up   |
| Gm46519   | 3.83062 | 4.38187 | 2.13001 | 2.05721 | 0.03967  | 0.35901  | 0       | 0       | 0.97414 | 7.15208 | 14.8575 | 0       | Up   |
| Mb        | 5407.08 | -5.3189 | 1.88341 | -2.8241 | 0.00474  | 0.09258  | 5136.01 | 22329.7 | 4183.93 | 3.06518 | 779.524 | 10.2487 | Down |
| Apol6     | 212.141 | -1.5337 | 0.55877 | -2.7448 | 0.00606  | 0.10879  | 183.323 | 588.43  | 174.371 | 135.889 | 141.642 | 49.1936 | Down |
| Apol9a    |         |         |         |         |          |          |         |         |         |         |         |         |      |

|           |         |         |         |         |          |          |         |         |         |         |         |         |      |
|-----------|---------|---------|---------|---------|----------|----------|---------|---------|---------|---------|---------|---------|------|
| Csf2rb    | 1984.64 | 1.10888 | 0.3505  | 3.16371 | 0.00156  | 0.04258  | 1635.12 | 1224.33 | 912.768 | 2615.62 | 3956.06 | 1563.95 | Up   |
| Il2rb     | 844.694 | 0.86052 | 0.29535 | 2.91355 | 0.00357  | 0.07588  | 552.926 | 665.569 | 581.561 | 1049.31 | 1537.26 | 681.536 | Up   |
| Gm49490   | 28.8536 | -1.9611 | 0.68274 | -2.8724 | 0.00407  | 0.08354  | 30.5539 | 68.2381 | 38.9655 | 19.4128 | 12.8765 | 3.0746  | Down |
| Sstr3     | 35.4403 | -2.764  | 0.69733 | -3.9637 | 7.38E-05 | 0.00422  | 35.4819 | 121.642 | 28.25   | 8.1738  | 10.8955 | 8.19893 | Down |
| Rac2      | 3117.95 | 0.64569 | 0.2487  | 2.59622 | 0.00943  | 0.14539  | 2931.2  | 2319.11 | 2044.72 | 3682.3  | 4937.65 | 2792.76 | Up   |
| Cyth4     | 1815.54 | 0.65056 | 0.27873 | 2.33401 | 0.01959  | 0.236    | 1643.01 | 1300.48 | 1295.6  | 2059.8  | 3105.22 | 1489.13 | Up   |
| Grap2     | 789.64  | 0.68807 | 0.23246 | 2.95995 | 0.00308  | 0.06914  | 647.545 | 585.463 | 581.561 | 1039.09 | 1197.52 | 686.66  | Up   |
| Mrtfa     | 1983.59 | 0.34935 | 0.14922 | 2.34115 | 0.01922  | 0.23297  | 1807.61 | 1572.44 | 1853.79 | 2252.9  | 2461.39 | 1953.39 | Up   |
| Csdc2     | 326.403 | -2.3931 | 0.53301 | -4.4897 | 7.13E-06 | 0.00068  | 397.2   | 926.654 | 321.466 | 54.1514 | 187.205 | 71.7406 | Down |
| Cenpm     | 47.9336 | 1.10066 | 0.41207 | 2.67104 | 0.00756  | 0.12551  | 21.6834 | 42.5252 | 27.2759 | 75.6077 | 71.3161 | 49.1936 | Up   |
| Sult4a1   | 46.3097 | -1.4068 | 0.4716  | -2.983  | 0.00285  | 0.06475  | 85.748  | 69.2271 | 46.7587 | 17.3693 | 19.81   | 38.9449 | Down |
| Pnpla3    | 61.5865 | -3.3408 | 0.74572 | -4.4799 | 7.47E-06 | 0.00069  | 57.1653 | 235.372 | 43.8362 | 7.15208 | 18.8195 | 7.17406 | Down |
| Gm49513   | 71.4137 | -1.6691 | 0.6526  | -2.5576 | 0.01054  | 0.15671  | 57.1653 | 195.814 | 73.0604 | 32.6952 | 57.449  | 12.2984 | Down |
| Parvg     | 735.394 | 0.79354 | 0.30323 | 2.61696 | 0.00887  | 0.14005  | 656.415 | 479.645 | 478.302 | 943.053 | 1271.8  | 583.149 | Up   |
| Shisal1   | 162.815 | -0.4834 | 0.24261 | -1.9927 | 0.04629  | 0.38491  | 200.079 | 217.571 | 151.966 | 135.889 | 153.528 | 117.86  | Down |
| Fam118a   | 921.06  | -0.3205 | 0.16262 | -1.9712 | 0.0487   | 0.3951   | 925.487 | 985.002 | 1158.25 | 842.923 | 723.066 | 891.633 | Down |
| Gm19277   | 9.38754 | -5.6682 | 1.97923 | -2.8639 | 0.00419  | 0.08518  | 13.7985 | 41.5362 | 0       | 0       | 0.9905  | 0       | Down |
| Wnt7b     | 416.843 | -0.6307 | 0.25076 | -2.5153 | 0.01189  | 0.16878  | 530.257 | 623.044 | 366.276 | 358.626 | 273.378 | 349.479 | Down |
| Lncppara  | 442.254 | -0.4843 | 0.22076 | -2.1936 | 0.02826  | 0.29024  | 377.488 | 580.518 | 589.354 | 355.56  | 372.428 | 378.176 | Down |
| Ppara     | 197.193 | -0.8058 | 0.34812 | -2.3148 | 0.02062  | 0.24375  | 155.726 | 303.61  | 293.216 | 163.476 | 99.0501 | 168.078 | Down |
| Gtse1     | 108.539 | 0.83465 | 0.30659 | 2.72239 | 0.00648  | 0.11407  | 65.0502 | 93.951  | 75.0087 | 156.324 | 160.461 | 100.437 | Up   |
| Mlc1      | 3471.94 | 0.54998 | 0.22909 | 2.40069 | 0.01636  | 0.21047  | 3800.51 | 2161.86 | 2491.85 | 4030.71 | 4335.42 | 4011.33 | Up   |
| Mov10l1   | 46.2177 | -3.9257 | 0.70082 | -5.6016 | 2.12E-08 | 4.99E-06 | 69.9782 | 150.322 | 39.9397 | 4.0869  | 9.90501 | 3.0746  | Down |
| Mapk8ip2  | 7.56146 | -2.9957 | 1.01876 | -2.9406 | 0.00328  | 0.07219  | 13.7985 | 14.8344 | 11.6897 | 3.06518 | 1.981   | 0       | Down |
| Lrrk2     | 7919.04 | 0.41416 | 0.20162 | 2.05417 | 0.03996  | 0.36     | 7992.3  | 6353.07 | 6025.05 | 8887.99 | 10933.1 | 7322.67 | Up   |
| Gm26760   | 80.6355 | -1.3424 | 0.52226 | -2.5705 | 0.01016  | 0.15295  | 89.6904 | 202.736 | 54.5518 | 59.2601 | 38.6295 | 38.9449 | Down |
| Pdzrn4    | 32.2225 | -1.3911 | 0.69143 | -2.012  | 0.04422  | 0.37762  | 31.5395 | 88.0173 | 20.4569 | 11.239  | 27.734  | 14.3481 | Down |
| D030018L  | 1230.76 | -0.8634 | 0.38521 | -2.2414 | 0.025    | 0.27341  | 1111.77 | 1846.38 | 1807.03 | 637.557 | 539.823 | 1441.99 | Down |
| Pfkm      | 2170.43 | -1.2932 | 0.31274 | -4.1352 | 3.55E-05 | 0.00241  | 2534    | 4747.99 | 1966.79 | 1213.81 | 1273.78 | 1286.21 | Down |
| Rnd1      | 691.123 | 0.38066 | 0.14369 | 2.64914 | 0.00807  | 0.13085  | 606.149 | 577.552 | 617.604 | 755.055 | 715.142 | 875.235 | Up   |
| Prph      | 98.9619 | -1.9039 | 0.51895 | -3.6688 | 0.00024  | 0.01097  | 204.021 | 162.189 | 102.285 | 30.6518 | 19.81   | 74.8152 | Down |
| Troap     | 64.1299 | 1.52085 | 0.59547 | 2.55404 | 0.01065  | 0.15717  | 13.7985 | 60.3264 | 25.3276 | 136.911 | 94.0976 | 54.3179 | Up   |
| Faim2     | 1298.54 | -0.3656 | 0.14371 | -2.5442 | 0.01095  | 0.16037  | 1537.55 | 1423.11 | 1426.14 | 1154.55 | 1260.91 | 988.996 | Down |
| Aqp2      | 34.6583 | -1.9592 | 0.49084 | -3.9915 | 6.57E-05 | 0.00388  | 64.0646 | 67.2491 | 34.0948 | 18.3911 | 12.8765 | 11.2735 | Down |
| Racgap1   | 512.345 | 0.86083 | 0.24805 | 3.47036 | 0.00052  | 0.01958  | 328.208 | 438.108 | 325.362 | 753.012 | 751.79  | 477.587 | Up   |
| Tmprss12  | 23.6695 | -4.24   | 1.04528 | -4.0563 | 4.99E-05 | 0.00317  | 32.5251 | 67.2491 | 35.069  | 0       | 0       | 7.17406 | Down |
| Slc11a2   | 4392.01 | -0.6889 | 0.16456 | -4.1865 | 2.83E-05 | 0.00201  | 5126.15 | 5975.28 | 5161.96 | 3025.33 | 3073.52 | 3989.8  | Down |
| Pou6f1    | 1985.57 | -0.2383 | 0.11314 | -2.1067 | 0.03514  | 0.3317   | 2114.13 | 2058.02 | 2275.59 | 1775.76 | 1937.42 | 1752.52 | Down |
| Gm49492   | 266.947 | -0.447  | 0.1871  | -2.3891 | 0.01689  | 0.21427  | 341.021 | 287.787 | 295.164 | 195.15  | 240.692 | 241.868 | Down |
| Bin2      | 1282.2  | 0.68311 | 0.29877 | 2.28638 | 0.02223  | 0.2547   | 1123.59 | 1016.65 | 812.432 | 1413.05 | 2282.11 | 1045.36 | Up   |
| Nr4a1     | 7882.54 | -1.4236 | 0.39379 | -3.615  | 0.0003   | 0.01287  | 6894.33 | 17884.3 | 9673.2  | 3930.58 | 2700.11 | 6212.74 | Down |
| Krt8      | 9.7471  | -1.3834 | 0.70348 | -1.9665 | 0.04924  | 0.39755  | 17.741  | 11.8675 | 12.6638 | 5.10863 | 4.9525  | 6.1492  | Down |
| Krt5      | 23.7291 | -6.1316 | 1.79951 | -3.4074 | 0.00066  | 0.02324  | 6.89926 | 132.52  | 0.97414 | 0       | 1.981   | 0       | Down |
| Esp1      | 226.285 | 0.93695 | 0.23335 | 4.0153  | 5.94E-05 | 0.0036   | 143.899 | 164.167 | 157.81  | 347.387 | 317.951 | 226.495 | Up   |
| Nckap1l   | 1987.47 | 0.80902 | 0.32545 | 2.48583 | 0.01292  | 0.17801  | 1837.17 | 1319.27 | 1176.76 | 2155.84 | 3784.7  | 1651.06 | Up   |
| Ppp1r1a   | 223.938 | -1.5008 | 0.36787 | -4.0798 | 4.51E-05 | 0.00291  | 273.999 | 512.28  | 206.517 | 119.542 | 98.0596 | 133.233 | Down |
| Srl       | 1666.53 | -3.9895 | 1.02116 | -3.9068 | 9.35E-05 | 0.00511  | 1712    | 6129.56 | 1565.44 | 68.4556 | 442.754 | 80.9644 | Down |
| Cdip1     | 3301.82 | -0.2159 | 0.10282 | -2.1    | 0.03573  | 0.33519  | 3527.49 | 3556.29 | 3561.45 | 2976.29 | 2918.02 | 3271.37 | Down |
| Sec14l5   | 718.36  | -0.0903 | 0.27588 | -3.2961 | 0.00098  | 0.031    | 809.185 | 1072.03 | 931.276 | 500.645 | 329.837 | 667.188 | Down |
| Rbfox1    | 107.037 | -1.7315 | 0.45292 | -3.8229 | 0.00013  | 0.00672  | 119.259 | 278.886 | 95.4656 | 50.0645 | 54.4775 | 44.0692 | Down |
| Abat      | 450.665 | -0.9928 | 0.37233 | -2.6665 | 0.00766  | 0.12672  | 405.085 | 951.378 | 443.233 | 216.606 | 324.884 | 362.803 | Down |
| Rpl39l    | 3.51023 | 3.28783 | 1.60968 | 2.04254 | 0.0411   | 0.36508  | 0       | 0       | 1.94828 | 5.10863 | 9.90501 | 4.09946 | Up   |
| Ciita     | 65.6025 | 0.97722 | 0.45973 | 2.12564 | 0.03353  | 0.32299  | 41.3956 | 41.5362 | 49.6811 | 102.173 | 118.86  | 39.9698 | Up   |
| Rmi2      | 48.866  | 1.32635 | 0.40451 | 3.2789  | 0.00104  | 0.03224  | 37.4531 | 23.735  | 22.4052 | 89.9118 | 65.3731 | 54.3179 | Up   |
| Tnfrsf17  | 23.0368 | 2.20867 | 0.71647 | 3.08271 | 0.00205  | 0.05157  | 9.85609 | 8.90062 | 5.84483 | 41.8907 | 59.4301 | 12.2984 | Up   |
| Gm15738   | 14.0079 | -1.9648 | 0.69411 | -2.8307 | 0.00465  | 0.09178  | 23.6546 | 28.6798 | 14.6121 | 4.0869  | 8.91451 | 4.09946 | Down |
| 2310015D  | 13.9952 | -3.6807 | 1.07528 | -3.423  | 0.00062  | 0.02229  | 6.89926 | 57.3596 | 13.6379 | 2.04345 | 1.981   | 2.04973 | Down |
| Myh11     | 4979.66 | -0.6593 | 0.25918 | -2.5437 | 0.01097  | 0.16049  | 4202.64 | 7839.47 | 6252.02 | 3409.5  | 3455.86 | 4718.48 | Down |
| Gm33696   | 24.6396 | -1.6508 | 0.72719 | -2.2701 | 0.0232   | 0.26121  | 47.3092 | 31.6467 | 33.1207 | 13.2824 | 1.981   | 20.4973 | Down |
| Sdf2l1    | 995.425 | 0.71004 | 0.19472 | 3.64639 | 0.00027  | 0.0117   | 693.869 | 770.398 | 801.716 | 1220.96 | 1497.64 | 987.971 | Up   |
| Prodh     | 2198    | -0.2421 | 0.11252 | -2.1517 | 0.03142  | 0.31043  | 2294.5  | 2417.01 | 2434.37 | 1960.69 | 1907.7  | 2173.74 | Down |
| Rtn4r     | 42.8723 | -0.9174 | 0.45551 | -2.014  | 0.04401  | 0.37695  | 38.4387 | 78.1277 | 51.6293 | 38.8256 | 29.715  | 20.4973 | Down |
| 4933432IC | 27.7785 | -1.1182 | 0.50014 | -2.2359 | 0.02536  | 0.27515  | 33.5107 | 49.4479 | 31.1724 | 10.2173 | 20.8005 | 21.5222 | Down |
| 2010309G  | 93.8096 | 1.17201 | 0.44844 | 2.61352 | 0.00896  | 0.14073  | 56.1797 | 63.2933 | 53.5776 | 149.172 | 183.243 | 57.3925 | Up   |
| Igic2     | 323.346 | 0.90273 | 0.34849 | 2.5904  | 0.00959  | 0.14714  | 245.417 | 201.747 | 228.923 | 597.709 | 439.782 | 226.495 | Up   |
| Iglv3     | 53.4957 | 1.07622 | 0.49377 | 2.17962 | 0.02929  | 0.29719  | 48.2948 | 29.6687 | 25.3276 | 81.738  | 99.0501 | 36.8952 | Up   |
| Iglv2     | 113.856 | 1.73543 | 0.82811 | 2.09565 | 0.03611  | 0.33781  | 21.6834 | 45.4921 | 90.5949 | 254.41  | 254.559 | 16.3979 | Up   |
| Lamp3     | 27905.6 | 0.58317 | 0.20379 | 2.86156 | 0.00422  | 0.08564  | 27795.2 | 18248.3 | 20980   | 33851.8 | 37883.7 | 28674.7 | Up   |
| Klhl6     | 1009.6  | 0.49715 | 0.19847 | 2.50492 | 0.01225  | 0.17173  | 892.962 | 922.698 | 696.509 | 1265.92 | 1322.32 | 957.225 | Up   |
| Cyp2ab1   | 119.922 | 1.03519 | 0.44312 | 2.33613 | 0.01948  | 0.23533  | 104.475 | 67.2491 | 64.2931 | 131.803 | 260.502 | 91.2131 | Up   |
| Thpo      | 68.3776 | -0.706  | 0.32685 | -2.16   | 0.03077  | 0.30693  | 81.8055 | 71.205  | 101.31  | 65.3904 | 48.5345 | 42.0195 | Down |
| Liph      | 2695.9  | -0.3089 | 0.14831 | -2.0825 | 0.03729  | 0.34397  | 2968.65 | 3001.49 | 2979.89 | 2202.84 | 2194.95 | 2827.6  | Down |
| Adipoq    | 618.469 | -6.2415 | 0.83182 | -7.5035 | 6.22E-14 | 4.19E-11 | 651.487 | 2462.51 | 548.44  | 7.15208 | 22.7815 | 18.4476 | Down |
| Rtp4      | 1911.2  | 0.40211 | 0.1703  | 2.36123 | 0.01821  | 0.22464  | 1633.15 | 1851.33 | 1455.36 | 2137.45 | 2499.03 | 1890.88 | Up   |
| Cldn1     | 607.982 | 0.63629 | 0.30104 | 2.11363 | 0.03455  | 0.32867  | 555.883 | 487.556 | 384.785 | 692.73  | 1037.05 | 489.886 | Up   |
| Uts2b     | 15.981  | -4.4951 | 1.21531 | -3.6987 | 0.00022  | 0.00994  | 13.7985 | 69.2271 | 8.76725 | 2.04345 | 0       | 2.04973 | Down |
| Fgf12     | 424.108 | -3.1961 | 0.54857 | -5.8261 | 5.67E-09 | 1.57E-06 | 410.013 | 1456.74 | 427.647 | 63.347  | 136.689 | 50.2184 | Down |
| Plaat1    | 43.257  | -4.6305 | 0.946   |         |          |          |         |         |         |         |         |         |      |



|           |         |         |         |         |          |          |         |         |         |         |         |         |      |
|-----------|---------|---------|---------|---------|----------|----------|---------|---------|---------|---------|---------|---------|------|
| Sik1      | 6499.75 | -0.299  | 0.1391  | -2.1495 | 0.03159  | 0.31109  | 7385.17 | 7776.18 | 6351.38 | 5319.1  | 5863.77 | 6302.93 | Down |
| Rasal3    | 1057.72 | 0.77992 | 0.20913 | 3.72933 | 0.00019  | 0.00913  | 807.214 | 726.884 | 801.716 | 1479.46 | 1546.17 | 984.896 | Up   |
| Pglyrpf   | 138.997 | 0.92494 | 0.30152 | 3.06757 | 0.00216  | 0.05336  | 100.532 | 76.1498 | 111.052 | 198.215 | 218.901 | 129.133 | Up   |
| Cyp4f40   | 10.5689 | -1.6726 | 0.81365 | -2.0557 | 0.03981  | 0.35955  | 13.7985 | 26.7019 | 7.79311 | 4.0869  | 6.93351 | 4.09946 | Down |
| Gm26693   | 130.654 | 0.48656 | 0.2185  | 2.22687 | 0.02596  | 0.27859  | 114.331 | 118.675 | 93.5173 | 144.063 | 155.509 | 157.829 | Up   |
| Gm50050   | 31.0569 | 0.80603 | 0.40148 | 2.00763 | 0.04468  | 0.37936  | 21.6834 | 20.7681 | 25.3276 | 46.9994 | 34.6675 | 36.8952 | Up   |
| Zfp870    | 579.444 | 0.28611 | 0.1333  | 2.14642 | 0.03184  | 0.31225  | 485.905 | 537.993 | 542.595 | 672.295 | 625.006 | 612.87  | Up   |
| Zfp472    | 773.003 | 0.3016  | 0.13119 | 2.29899 | 0.02151  | 0.25004  | 650.502 | 699.193 | 727.682 | 854.162 | 795.372 | 911.106 | Up   |
| Myo1f     | 2054.59 | 0.7615  | 0.34121 | 2.23176 | 0.02563  | 0.27683  | 1792.82 | 1554.64 | 1226.44 | 2260.06 | 3978.84 | 1514.75 | Up   |
| Kifc1     | 147.539 | 1.25188 | 0.33948 | 3.68764 | 0.00023  | 0.01027  | 103.489 | 99.8848 | 58.4483 | 268.714 | 204.043 | 150.655 | Up   |
| Tapbp     | 14259.2 | 0.22969 | 0.1136  | 2.02195 | 0.04318  | 0.37341  | 11985   | 13702   | 13692.5 | 15112.3 | 16228.4 | 14834.9 | Up   |
| H2-K2     | 1547.24 | 0.46467 | 0.18886 | 2.4604  | 0.01388  | 0.18685  | 1043.76 | 1346.96 | 1509.91 | 1678.69 | 2031.52 | 1672.58 | Up   |
| H2-K1     | 73124.9 | 0.62233 | 0.22047 | 2.82276 | 0.00476  | 0.09288  | 50283.8 | 62223.3 | 60272.9 | 80666.2 | 115845  | 69458.2 | Up   |
| H2-DMa    | 3378.61 | 0.58581 | 0.19472 | 3.00841 | 0.00263  | 0.06102  | 3048.49 | 2515.91 | 2541.53 | 3944.88 | 4950.52 | 3270.35 | Up   |
| H2-DMb1   | 3214.04 | 0.71051 | 0.18559 | 3.8284  | 0.00013  | 0.0066   | 2265.91 | 2461.52 | 2587.31 | 3741.56 | 4924.77 | 3303.14 | Up   |
| Psmb9     | 2385.56 | 0.39579 | 0.19783 | 2.00072 | 0.04542  | 0.38155  | 2318.15 | 1927.48 | 1935.61 | 2350.99 | 3400.39 | 2380.76 | Up   |
| Tap1      | 4110.19 | 0.76936 | 0.30624 | 2.51225 | 0.012    | 0.16977  | 3248.57 | 3178.51 | 2691.54 | 4267.75 | 7880.42 | 3394.36 | Up   |
| Psmb8     | 712.856 | 0.62087 | 0.27867 | 2.228   | 0.02588  | 0.27824  | 680.07  | 526.126 | 479.276 | 805.12  | 1175.72 | 610.82  | Up   |
| H2-Ab1    | 23362   | 0.86388 | 0.19732 | 4.37798 | 1.20E-05 | 0.00097  | 16635.1 | 16613.5 | 16459   | 29670.9 | 37712.3 | 23081   | Up   |
| H2-Aa     | 34901.6 | 0.67646 | 0.18542 | 4.72694 | 2.28E-06 | 0.00026  | 22604   | 24889.1 | 26350.4 | 43061.6 | 55618.6 | 36885.9 | Up   |
| H2-Eb1    | 19288.6 | 1.02997 | 0.26281 | 3.91901 | 8.89E-05 | 0.00489  | 8975.94 | 14471.4 | 14597.5 | 24554.1 | 33163.9 | 19968.5 | Up   |
| H2-Eb2    | 240.322 | 0.91105 | 0.28979 | 3.14382 | 0.00167  | 0.04435  | 185.294 | 178.012 | 137.354 | 364.756 | 368.466 | 208.048 | Up   |
| Btnl4     | 32.2505 | 6.01272 | 2.51565 | 2.39013 | 0.01684  | 0.21408  | 0       | 1.97792 | 0.97414 | 12.2607 | 178.29  | 0       | Up   |
| Vva7      | 138.755 | -0.5957 | 0.2899  | -2.055  | 0.03988  | 0.35961  | 180.366 | 142.41  | 178.267 | 132.824 | 122.822 | 75.8401 | Down |
| Clic1     | 11773.7 | 0.24611 | 0.08131 | 3.02688 | 0.00247  | 0.05873  | 10550   | 10825.1 | 10940.6 | 12674.5 | 12857.7 | 12794.4 | Up   |
| Aif1      | 307.18  | 0.7049  | 0.15599 | 4.51888 | 6.22E-06 | 0.0006   | 253.301 | 220.538 | 226.974 | 367.821 | 394.219 | 380.225 | Up   |
| Ltb       | 1012.87 | 0.54187 | 0.19635 | 2.75977 | 0.00578  | 0.10589  | 1019.12 | 720.95  | 734.5   | 1352.76 | 1144.03 | 1105.83 | Up   |
| Tnf       | 131.144 | 1.55478 | 0.41761 | 3.72302 | 0.0002   | 0.0093   | 82.7911 | 77.1387 | 39.9397 | 221.714 | 253.568 | 111.71  | Up   |
| Lta       | 39.4914 | 1.49863 | 0.39696 | 3.77526 | 0.00016  | 0.00783  | 26.6114 | 17.8012 | 17.5345 | 66.4121 | 60.4206 | 48.1687 | Up   |
| Gm18733   | 7.22669 | -5.2821 | 2.12781 | -2.4824 | 0.01305  | 0.17905  | 38.4387 | 0       | 3.89655 | 0       | 0       | 1.02487 | Down |
| Gm11131   | 306.441 | 0.63654 | 0.21371 | 2.97851 | 0.0029   | 0.0655   | 238.517 | 194.825 | 286.397 | 362.713 | 417.991 | 338.206 | Up   |
| H2-Q5     | 2109.68 | 0.78686 | 0.37408 | 2.10349 | 0.03542  | 0.33353  | 1215.26 | 1721.78 | 1707.66 | 2209.99 | 4354.24 | 1449.16 | Up   |
| H2-Q7     | 8072.4  | 0.87193 | 0.3361  | 2.59425 | 0.00948  | 0.14581  | 5180.36 | 6016.82 | 5916.92 | 8249.41 | 16744.4 | 6326.5  | Up   |
| Tcf19     | 420.42  | 0.65788 | 0.27145 | 2.42357 | 0.01537  | 0.19982  | 403.114 | 305.588 | 269.836 | 678.426 | 397.191 | 468.364 | Up   |
| Tubb5     | 16007   | 0.49154 | 0.14157 | 3.47198 | 0.00052  | 0.0195   | 12386.1 | 12831.7 | 14700.7 | 20754.3 | 16838.3 | 16730.9 | Up   |
| H2-T22    | 4887.49 | 0.70931 | 0.26666 | 2.66    | 0.00781  | 0.12796  | 2708.45 | 4232.74 | 4187.82 | 5196.5  | 8122.11 | 4877.34 | Up   |
| Gm20495   | 2.87138 | 3.94289 | 1.81868 | 2.16799 | 0.03016  | 0.30293  | 0       | 0       | 0.97414 | 2.04345 | 3.962   | 10.2487 | Up   |
| H2-M5     | 175.198 | -1.0528 | 0.28437 | -3.7024 | 0.00021  | 0.00987  | 158.683 | 275.919 | 274.707 | 108.303 | 120.841 | 112.735 | Down |
| Ubd       | 61.3413 | 3.05872 | 1.01652 | 3.00901 | 0.00262  | 0.06102  | 3.94243 | 29.6687 | 5.84483 | 77.6511 | 240.692 | 10.2487 | Up   |
| H2-M3     | 1402.41 | 0.42829 | 0.20673 | 2.07169 | 0.03829  | 0.35064  | 1280.31 | 1127.41 | 1179.68 | 1467.2  | 2058.26 | 1301.58 | Up   |
| H2-M2     | 177.228 | 2.98875 | 0.51971 | 5.7508  | 8.88E-09 | 2.40E-06 | 41.3956 | 42.5252 | 35.069  | 393.364 | 453.649 | 97.3623 | Up   |
| Olfr111   | 4.48848 | 5.63457 | 2.35396 | 2.39365 | 0.01668  | 0.21266  | 0       | 0       | 0       | 6.13035 | 20.8005 | 0       | Up   |
| Mep1a     | 13.1967 | -1.9513 | 0.73801 | -2.644  | 0.00819  | 0.13205  | 13.7985 | 24.724  | 24.3535 | 8.1738  | 1.981   | 6.1492  | Down |
| Rcan2     | 2187.13 | -0.7199 | 0.27413 | -2.6262 | 0.00863  | 0.13709  | 2335.89 | 3856.94 | 1972.63 | 1721.61 | 1854.22 | 1381.52 | Down |
| Nfkbie    | 624.298 | 0.75514 | 0.32286 | 2.33887 | 0.01934  | 0.234    | 546.027 | 467.777 | 379.914 | 769.359 | 1113.32 | 469.389 | Up   |
| Srf       | 2412.87 | -0.359  | 0.13715 | -2.6179 | 0.00885  | 0.13977  | 2405.87 | 2987.64 | 2741.23 | 1966.82 | 2172.17 | 2203.46 | Down |
| Pgc       | 90.8444 | 0.94007 | 0.32818 | 2.86446 | 0.00418  | 0.08511  | 50.266  | 69.2271 | 67.2156 | 151.215 | 85.1831 | 121.959 | Up   |
| Trem14    | 385.074 | 1.04322 | 0.472   | 2.21023 | 0.02709  | 0.28467  | 239.503 | 331.301 | 184.112 | 297.322 | 954.843 | 303.36  | Up   |
| Trem2     | 320.893 | 1.28215 | 0.51398 | 2.49452 | 0.01261  | 0.17493  | 281.884 | 168.123 | 111.052 | 323.887 | 822.116 | 218.296 | Up   |
| Apobec2   | 195.005 | -2.6821 | 0.48359 | -5.5463 | 2.92E-08 | 6.63E-06 | 226.69  | 617.11  | 168.526 | 48.0211 | 58.4396 | 51.2433 | Down |
| Unc5cl    | 265.551 | -1.2236 | 0.29332 | -4.1717 | 3.02E-05 | 0.00212  | 253.301 | 462.832 | 399.397 | 186.976 | 125.794 | 165.003 | Down |
| Gm49896   | 6.40892 | -4.1627 | 1.52277 | -2.7336 | 0.00626  | 0.11134  | 1.97122 | 22.746  | 11.6897 | 1.02173 | 0       | 1.02487 | Down |
| Rftn1     | 2366.56 | 0.57057 | 0.24711 | 2.30894 | 0.02095  | 0.24625  | 1683.42 | 1913.63 | 2116.8  | 2885.35 | 3654.95 | 1945.2  | Up   |
| Tbc1d5    | 1829.76 | 0.21673 | 0.10216 | 2.12139 | 0.03389  | 0.32468  | 1673.56 | 1723.75 | 1680.39 | 2071.04 | 1923.55 | 1906.25 | Up   |
| Sgo1      | 87.9932 | 1.14737 | 0.42992 | 2.66881 | 0.00761  | 0.12606  | 62.0933 | 55.3817 | 46.7587 | 168.585 | 135.699 | 59.4422 | Up   |
| Shd       | 35.3876 | -1.2284 | 0.62435 | -1.9674 | 0.04913  | 0.39723  | 44.3524 | 83.0725 | 21.431  | 21.4562 | 29.715  | 12.2984 | Down |
| Plin4     | 1257.1  | -2.4908 | 0.457   | -5.4504 | 5.03E-08 | 1.09E-05 | 1376.9  | 3966.71 | 1059.86 | 286.083 | 461.573 | 391.499 | Down |
| Plin5     | 496.679 | -0.9338 | 0.37479 | -2.4915 | 0.01272  | 0.1761   | 541.099 | 942.477 | 472.457 | 275.866 | 235.739 | 512.433 | Down |
| Tnfaiip81 | 125.782 | 0.71355 | 0.26167 | 2.72695 | 0.00639  | 0.11296  | 97.5753 | 83.0725 | 105.207 | 192.084 | 146.594 | 130.158 | Up   |
| Uhrf1     | 326.097 | 0.72292 | 0.23275 | 3.10605 | 0.0019   | 0.04886  | 245.417 | 251.195 | 241.586 | 509.841 | 403.134 | 305.41  | Up   |
| Ptprs     | 3548.48 | -0.2282 | 0.09291 | -2.4562 | 0.01404  | 0.18835  | 3874.43 | 3713.54 | 3897.53 | 3364.54 | 3173.56 | 3267.27 | Down |
| Ndufa11   | 1227.05 | -0.4039 | 0.20057 | -2.0137 | 0.04405  | 0.377    | 1205.4  | 1616.95 | 1370.61 | 1040.12 | 869.66  | 1259.56 | Down |
| Nrtn      | 165.789 | -0.7542 | 0.37809 | -1.9948 | 0.04606  | 0.38407  | 264.143 | 257.129 | 103.259 | 117.498 | 130.746 | 121.959 | Down |
| Prr22     | 40.722  | -0.9033 | 0.39494 | -2.2872 | 0.02219  | 0.25456  | 41.3956 | 59.3375 | 58.4483 | 36.7821 | 23.772  | 24.5968 | Down |
| Tubb4a    | 1576.23 | -0.4839 | 0.21505 | -2.2502 | 0.02444  | 0.26955  | 1360.14 | 2045.17 | 2109.01 | 1498.87 | 1244.07 | 1200.12 | Down |
| Tnfsf14   | 136.833 | 0.89357 | 0.39013 | 2.29047 | 0.02199  | 0.25304  | 126.158 | 94.94   | 66.2414 | 203.323 | 226.825 | 103.511 | Up   |
| Vav1      | 942.966 | 0.71329 | 0.31385 | 2.27269 | 0.02304  | 0.25987  | 871.278 | 719.961 | 552.337 | 1127.98 | 1644.23 | 742.003 | Up   |
| Adgre1    | 1128.27 | 0.8678  | 0.43098 | 2.01356 | 0.04406  | 0.377    | 1166.96 | 792.155 | 437.388 | 1278.18 | 2279.14 | 815.793 | Up   |
| Gm20742   | 3.61271 | -5.2779 | 1.91631 | -2.7542 | 0.00588  | 0.10686  | 1.97122 | 14.8344 | 4.87069 | 0       | 0       | 0       | Down |
| Gm36201   | 11.5483 | -1.6063 | 0.80552 | -1.9942 | 0.04613  | 0.38422  | 9.85609 | 29.6687 | 12.6638 | 4.0869  | 8.91451 | 4.09946 | Down |
| Lama1     | 229.456 | 1.31378 | 0.29727 | 4.41954 | 9.89E-06 | 0.00083  | 152.769 | 99.8848 | 142.224 | 406.647 | 228.806 | 346.405 | Up   |
| Tgif1     | 1372.66 | 0.27787 | 0.10488 | 2.64957 | 0.00806  | 0.13085  | 1224.13 | 1290.59 | 1207.93 | 1462.09 | 1500.61 | 1550.62 | Up   |
| Gm26510   | 61.3513 | 0.68096 | 0.33264 | 2.04711 | 0.04065  | 0.36257  | 36.4675 | 45.4921 | 59.4225 | 86.8467 | 74.2876 | 65.5914 | Up   |
| Myom1     | 1904.14 | -1.9082 | 0.43738 | -4.3628 | 1.28E-05 | 0.00102  | 1774.1  | 5307.74 | 1939.51 | 519.036 | 1071.72 | 812.719 | Down |
| Ndc80     | 134.755 | 1.09515 | 0.35979 | 3.04384 | 0.00234  | 0.05636  | 94.6184 | 100.874 | 62.3449 | 231.932 | 206.024 | 112.735 | Up   |
| Lbh       | 10664.6 | -0.3631 | 0.08792 | -4.1297 | 3.63E-05 | 0.00244  | 12352.6 | 12150.3 | 11495.8 | 9385.57 | 9335.47 | 9267.86 | Down |
| Lclat1    | 3420.47 | -0.3083 | 0.1424  | -2.1649 | 0.0304   | 0.30453  | 3662.52 | 4170.44 | 3520.54 | 2972.2  | 2783.31 | 3413.83 | Down |
| Capn13    | 103.26  |         |         |         |          |          |         |         |         |         |         |         |      |



|          |           |         |         |         |          |          |         |         |         |         |         |         |      |
|----------|-----------|---------|---------|---------|----------|----------|---------|---------|---------|---------|---------|---------|------|
| Ms4a8a   | 1151.09   | 0.98764 | 0.4387  | 2.25128 | 0.02437  | 0.26917  | 1043.76 | 741.719 | 529.931 | 1574.48 | 2379.18 | 637.467 | Up   |
| Ms4a14   | 68.9713   | 0.94425 | 0.46728 | 2.02072 | 0.04331  | 0.3735   | 41.3956 | 54.3927 | 45.7845 | 62.3252 | 152.537 | 57.3925 | Up   |
| Ms4a7    | 290.333   | 1.11995 | 0.35782 | 3.12991 | 0.00175  | 0.04609  | 228.661 | 185.924 | 134.431 | 349.43  | 588.358 | 255.192 | Up   |
| Ms4a4b   | 1249.76   | 0.75289 | 0.19565 | 3.84814 | 0.00012  | 0.00618  | 978.709 | 848.526 | 965.371 | 1792.11 | 1709.6  | 1204.22 | Up   |
| Ms4a6d   | 684.874   | 1.37332 | 0.44743 | 3.06937 | 0.00215  | 0.05312  | 451.409 | 421.296 | 271.785 | 823.511 | 1704.65 | 436.593 | Up   |
| Oosp1    | 19.6778   | 2.41215 | 0.75034 | 3.21474 | 0.00131  | 0.03744  | 7.88487 | 5.93375 | 4.87069 | 29.63   | 57.449  | 12.2984 | Up   |
| Gm6365   | 61.6031   | -1.1791 | 0.30903 | -3.8154 | 0.00014  | 0.00686  | 71.9494 | 89.0062 | 95.4656 | 35.7604 | 42.5915 | 34.8454 | Down |
| Mpeg1    | 9686.57   | 1.26057 | 0.41699 | 3.02302 | 0.0025   | 0.05921  | 8208.15 | 5195.99 | 3710.49 | 11110.2 | 22472.5 | 7422.08 | Up   |
| Lpxn     | 611.079   | 0.84285 | 0.30538 | 2.76    | 0.00578  | 0.10589  | 555.883 | 372.837 | 383.811 | 786.729 | 1057.85 | 509.358 | Up   |
| Ostf1    | 8198.64   | 0.24271 | 0.10993 | 2.20781 | 0.02726  | 0.28574  | 7512.31 | 7765.3  | 7254.41 | 8796.03 | 9590.03 | 8273.74 | Up   |
| Carnmt1  | 962.397   | 0.29271 | 0.14267 | 2.05168 | 0.0402   | 0.36086  | 963.925 | 830.725 | 800.742 | 982.9   | 1128.18 | 1067.91 | Up   |
| C730002L | 30.5937   | -3.0912 | 0.56892 | -5.4335 | 5.53E-08 | 1.16E-05 | 75.8919 | 45.4921 | 42.8621 | 6.13035 | 3.962   | 9.22379 | Down |
| Tmc1     | 9.32708   | 1.75818 | 0.83606 | 2.10293 | 0.03547  | 0.33377  | 3.94243 | 4.94479 | 3.89655 | 10.2173 | 24.7625 | 8.19893 | Up   |
| 1110059E | 2704.1    | -0.2793 | 0.11998 | -2.3277 | 0.01993  | 0.23828  | 2824.75 | 2942.15 | 3127.96 | 2494.03 | 2233.58 | 2602.13 | Down |
| C330002C | 391.808   | -0.8543 | 0.27435 | -3.1137 | 0.00185  | 0.04778  | 482.948 | 511.291 | 519.216 | 296.3   | 178.29  | 362.803 | Down |
| Ptar1    | 4043.91   | -0.2209 | 0.09746 | -2.2668 | 0.02341  | 0.26189  | 4254.87 | 4198.13 | 4605.73 | 3686.39 | 3783.71 | 3734.61 | Down |
| Fam189a2 | 11004.4   | -0.4293 | 0.19908 | -2.1565 | 0.03104  | 0.30805  | 9243.04 | 14034.3 | 14612.1 | 9288.51 | 9357.26 | 9491.28 | Down |
| Pgm5     | 1359.13   | -0.4208 | 0.18282 | -2.302  | 0.02134  | 0.24947  | 1370.98 | 1918.58 | 1378.41 | 1210.74 | 1185.63 | 1090.46 | Down |
| Kank1    | 2095.34   | -0.378  | 0.17226 | -2.1945 | 0.0282   | 0.28986  | 2426.57 | 2705.79 | 1972.63 | 1612.28 | 1942.37 | 1912.4  | Down |
| Dmrt3    | 22.2151   | -4.9979 | 1.2506  | -3.9979 | 6.39E-05 | 0.00379  | 7.88487 | 103.841 | 17.5345 | 0       | 1.981   | 2.04973 | Down |
| Gm35438  | 11.5613   | -1.9583 | 0.81631 | -2.3989 | 0.01644  | 0.21099  | 20.6978 | 24.724  | 9.74139 | 2.04345 | 3.962   | 8.19893 | Down |
| Vldlr    | 3037.26   | -0.4401 | 0.20578 | -2.1388 | 0.03245  | 0.31621  | 3091.85 | 4333.61 | 3065.61 | 2657.51 | 2929.9  | 2145.04 | Down |
| Gm50114  | 24.9419   | -4.3452 | 1.00662 | -4.3166 | 1.58E-05 | 0.00121  | 17.741  | 82.0835 | 42.8621 | 1.02173 | 5.94301 | 0       | Down |
| Kcnv2    | 22.9225   | -2.6235 | 1.00864 | -2.601  | 0.0093   | 0.14379  | 28.5827 | 74.1719 | 15.5862 | 12.2607 | 6.93351 | 0       | Down |
| Gm5518   | 154.071   | -0.8354 | 0.26807 | -3.1163 | 0.00183  | 0.04756  | 200.079 | 178.012 | 214.31  | 80.7163 | 111.927 | 139.382 | Down |
| Cd274    | 1755.95   | 0.67018 | 0.28339 | 2.3649  | 0.01804  | 0.22383  | 1480.38 | 1510.14 | 1075.45 | 1832.98 | 3064.61 | 1572.14 | Up   |
| Pdcd1lg2 | 70.2427   | 1.5199  | 0.60246 | 2.52282 | 0.01164  | 0.16637  | 32.5251 | 31.6467 | 44.8104 | 113.412 | 170.366 | 28.6962 | Up   |
| Mlana    | 199.886   | -1.856  | 0.51531 | -3.6016 | 0.00032  | 0.01336  | 207.963 | 596.342 | 135.405 | 92.977  | 71.3161 | 95.3125 | Down |
| Gm36860  | 3.44565   | -5.2096 | 1.74414 | -2.9869 | 0.00282  | 0.06412  | 5.91365 | 9.88958 | 4.87069 | 0       | 0       | 0       | Down |
| Acta2    | 12959.7   | -0.8999 | 0.38651 | -2.3281 | 0.01991  | 0.23828  | 8498.9  | 22171.5 | 19955.2 | 7781.46 | 6250.06 | 13100.9 | Down |
| Ch25h    | 609.927   | 1.10697 | 0.32111 | 3.44728 | 0.00057  | 0.20284  | 487.876 | 348.113 | 324.388 | 923.64  | 1083.61 | 491.936 | Up   |
| Ifit3    | 2532.21   | 0.56466 | 0.25699 | 2.19718 | 0.02801  | 0.28884  | 2789.27 | 1763.31 | 1576.16 | 3394.17 | 3227.05 | 2443.28 | Up   |
| Ifit1    | 1215.38   | 0.60814 | 0.27173 | 2.23805 | 0.02522  | 0.27466  | 907.746 | 960.278 | 1020.9  | 1616.37 | 1878.98 | 908.031 | Up   |
| Kif20b   | 196.225   | 0.73733 | 0.3321  | 2.22023 | 0.0264   | 0.28101  | 154.741 | 153.289 | 133.457 | 298.344 | 298.141 | 139.382 | Up   |
| Ankrd1   | 5072.85   | -2.6725 | 0.93194 | -2.8676 | 0.00414  | 0.08457  | 2903.6  | 20085.7 | 3320.84 | 1424.29 | 1415.43 | 1287.23 | Down |
| Gm32027  | 5.42597   | -3.9093 | 1.43919 | -2.7163 | 0.0066   | 0.11532  | 7.88487 | 14.8344 | 7.79311 | 2.04345 | 0       | 0       | Down |
| Hectd2os | 51.9303   | -1.5079 | 0.66872 | -2.2548 | 0.02414  | 0.26765  | 23.6546 | 153.289 | 53.5776 | 22.478  | 24.7625 | 33.8206 | Down |
| Ppp1r3c  | 1179.5    | -0.8158 | 0.36342 | -2.2449 | 0.02478  | 0.27237  | 885.077 | 2434.81 | 1193.32 | 694.773 | 865.698 | 1003.34 | Down |
| Kif11    | 323.021   | 1.05212 | 0.3173  | 3.3158  | 0.00091  | 0.02954  | 233.589 | 233.394 | 163.655 | 521.08  | 521.994 | 264.415 | Up   |
| Myof     | 7995.99   | 0.27521 | 0.13739 | 2.00315 | 0.04516  | 0.38075  | 7448.25 | 7044.35 | 7214.47 | 8773.56 | 9871.33 | 7623.98 | Up   |
| Cep55    | 136.642   | 1.75055 | 0.36975 | 4.73442 | 2.20E-06 | 0.00025  | 78.8487 | 57.3596 | 51.6293 | 304.474 | 189.186 | 138.357 | Up   |
| Ffar4    | 1329.91   | -0.4677 | 0.20925 | -2.2351 | 0.02541  | 0.27517  | 1534.59 | 1320.26 | 1775.85 | 998.226 | 959.795 | 1390.74 | Down |
| Hells    | 264.705   | 0.64096 | 0.26382 | 2.4295  | 0.01512  | 0.19752  | 223.733 | 221.527 | 175.345 | 394.386 | 344.694 | 228.545 | Up   |
| Gm5827   | 3.94768   | -3.4237 | 1.62223 | -2.1105 | 0.03482  | 0.32956  | 15.7697 | 3.95583 | 1.94828 | 1.02173 | 0.9905  | 0       | Down |
| Entpd1   | 811.88    | 0.48906 | 0.21185 | 2.30846 | 0.02097  | 0.24642  | 6665.67 | 6417.35 | 7184.27 | 9702.3  | 11802.8 | 6940.39 | Up   |
| Blnk     | 828.541   | 0.42171 | 0.19032 | 2.21576 | 0.02671  | 0.28205  | 826.926 | 748.641 | 549.414 | 921.596 | 975.643 | 949.026 | Up   |
| Pik3ap1  | 2310.13   | 0.80166 | 0.31201 | 2.56935 | 0.01019  | 0.15322  | 2320.12 | 1460.69 | 1272.22 | 2804.64 | 3973.89 | 2029.23 | Up   |
| Gm6937   | 23.21     | -1.9747 | 0.52624 | -3.7524 | 0.00018  | 0.00854  | 31.5395 | 41.5362 | 37.9914 | 7.15208 | 13.867  | 7.17406 | Down |
| Sfrp5    | 66.2987   | -3.601  | 0.58369 | -6.1695 | 6.85E-10 | 2.39E-07 | 87.7192 | 211.637 | 68.1897 | 6.13035 | 13.867  | 10.2487 | Down |
| Golga7b  | 4.27636   | -3.5615 | 1.68935 | -2.1082 | 0.03501  | 0.3306   | 3.94243 | 16.8123 | 2.92242 | 0       | 1.981   | 0       | Down |
| Got1     | 2301.79   | -1.1936 | 0.30588 | -3.9022 | 9.53E-05 | 0.00519  | 2292.53 | 4887.43 | 2429.5  | 1217.9  | 1536.27 | 1447.11 | Down |
| Kcnp2    | 164.492   | -0.9873 | 0.36617 | -2.6963 | 0.00701  | 0.11961  | 215.848 | 318.445 | 121.767 | 104.216 | 112.917 | 113.76  | Down |
| Col17a1  | 328.462   | -0.7245 | 0.21655 | -3.3457 | 0.00082  | 0.02719  | 409.028 | 429.208 | 389.655 | 239.084 | 308.046 | 195.749 | Down |
| Rbm20    | 404.597   | -2.1534 | 0.41985 | -5.129  | 2.91E-07 | 4.56E-05 | 527.301 | 1070.05 | 384.785 | 140.998 | 205.034 | 99.412  | Down |
| Adra2a   | 151.126   | -1.4913 | 0.41229 | -3.6171 | 0.0003   | 0.01279  | 156.712 | 302.621 | 209.44  | 71.5208 | 46.5535 | 119.909 | Down |
| Gm50186  | 151.279   | -1.3598 | 0.46357 | -2.9335 | 0.00335  | 0.07334  | 226.69  | 177.023 | 249.379 | 62.3252 | 41.601  | 150.655 | Down |
| Nrap     | 404.327   | -3.5499 | 1.01866 | -3.4849 | 0.00049  | 0.01875  | 387.344 | 1487.39 | 360.431 | 24.5214 | 140.651 | 25.6216 | Down |
| Casp7    | 1911.23   | 0.26724 | 0.13174 | 2.0286  | 0.0425   | 0.37204  | 1902.22 | 1670.35 | 1631.68 | 2156.86 | 2195.94 | 1910.35 | Up   |
| Gm32441  | 54.6902   | -0.8947 | 0.41201 | -2.1716 | 0.02988  | 0.30087  | 64.0646 | 79.1166 | 70.138  | 30.6518 | 25.753  | 58.4174 | Down |
| 1700019N | 3.43877   | -4.1724 | 1.6654  | -2.5054 | 0.01223  | 0.17173  | 5.91365 | 3.95583 | 9.74139 | 1.02173 | 0       | 0       | Down |
| E330013P | 8.55923   | 2.07598 | 0.8656  | 2.39831 | 0.01647  | 0.21109  | 5.91365 | 2.96687 | 0.97414 | 12.2607 | 13.867  | 15.373  | Up   |
| Csf2ra   | 2383.63   | 0.55121 | 0.24789 | 2.22365 | 0.02617  | 0.27994  | 2146.66 | 1929.46 | 1725.2  | 2849.59 | 3698.53 | 1952.37 | Up   |
| Cacna1f  | 21.0603   | 1.53398 | 0.53623 | 2.86069 | 0.00423  | 0.08572  | 6.89926 | 14.8344 | 10.7155 | 30.6518 | 37.639  | 25.6216 | Up   |
| Gata1    | 61.8674   | 1.20774 | 0.42758 | 2.82456 | 0.00473  | 0.09253  | 30.5539 | 53.4037 | 28.25   | 65.3904 | 120.841 | 72.7655 | Up   |
| Was      | 561.109   | 0.71629 | 0.31282 | 2.28976 | 0.02204  | 0.25315  | 526.315 | 419.318 | 328.285 | 648.796 | 977.624 | 466.314 | Up   |
| Xk       | 295.184   | -0.407  | 0.17558 | -2.3179 | 0.02045  | 0.2424   | 322.294 | 369.87  | 317.569 | 260.54  | 275.359 | 225.47  | Down |
| Cybb     | 5447.99   | 1.45302 | 0.45544 | 3.19037 | 0.00142  | 0.03994  | 4011.43 | 2893.69 | 1840.15 | 7086.69 | 13469.8 | 3386.16 | Up   |
| Otc      | 62.2013   | 1.02793 | 0.41981 | 2.44852 | 0.01434  | 0.19133  | 20.6978 | 51.4258 | 50.6552 | 88.8901 | 70.3256 | 91.2131 | Up   |
| Tspan7   | 39107.6   | 0.25444 | 0.12588 | 2.0213  | 0.04325  | 0.37347  | 34406.6 | 32984.7 | 39612.4 | 44260.1 | 43718.7 | 39663.3 | Up   |
| AA41476E | 142.749   | 0.85518 | 0.29499 | 2.89906 | 0.00374  | 0.07863  | 141.928 | 87.0283 | 75.9828 | 184.932 | 185.224 | 181.401 | Up   |
| Ndp      | 18.202    | -1.1793 | 0.53209 | -2.2163 | 0.02667  | 0.28205  | 27.597  | 27.6908 | 20.4569 | 14.3042 | 8.91451 | 10.2487 | Down |
| Zcchc12  | 51.9638   | -1.1746 | 0.57255 | -2.0515 | 0.04022  | 0.36086  | 47.3092 | 76.1498 | 92.5432 | 24.5214 | 13.867  | 57.3925 | Down |
| Gm14569  | 107.897   | -0.753  | 0.31166 | -2.4162 | 0.01568  | 0.20282  | 183.323 | 122.631 | 100.336 | 81.738  | 74.2876 | 85.0639 | Down |
| Sh2d1a   | 104.032   | 0.99706 | 0.40816 | 2.44283 | 0.01457  | 0.19345  | 60.1221 | 77.1387 | 71.1121 | 177.78  | 169.376 | 68.666  | Up   |
| Pr32     | 14.1378   | -7.2463 | 1.51234 | -4.7915 | 1.66E-06 | 0.0002   | 17.741  | 56.3706 | 10.7155 | 0       | 0       | 0       | Down |
| Gm29242  | 39.7489   | 6.32234 | 1.10425 | 5.72545 | 1.03E-08 | 2.72E-06 | 0.98561 | 0       | 1.94828 | 64.3687 | 146.594 | 24.5968 | Up   |
| Sash3    | 1318.17   | 0.831   | 0.28752 | 2.89027 | 0.00385  | 0.08043  | 1126.55 | 862.371 | 857.242 | 1493.76 | 2407.91 | 1161.17 | Up   |
| Aifm1    | 2120.18</ |         |         |         |          |          |         |         |         |         |         |         |      |

|           |         |         |         |         |          |          |         |         |         |         |         |         |      |
|-----------|---------|---------|---------|---------|----------|----------|---------|---------|---------|---------|---------|---------|------|
| Fmr1nb    | 9.86999 | 4.8616  | 1.75804 | 2.76535 | 0.00569  | 0.10531  | 1.97122 | 0       | 0       | 2.04345 | 3.962   | 51.2433 | Up   |
| Hmgb3     | 606.196 | -0.4146 | 0.13122 | -3.1594 | 0.00158  | 0.04279  | 680.07  | 729.851 | 668.259 | 485.32  | 542.794 | 530.881 | Down |
| Prrg3     | 5713.27 | 0.39098 | 0.17162 | 2.2782  | 0.02271  | 0.25741  | 5976.73 | 4278.23 | 4576.5  | 6736.24 | 6779.98 | 5931.92 | Up   |
| Cnga2     | 169.711 | -1.2009 | 0.33179 | -3.6195 | 0.0003   | 0.01275  | 304.553 | 175.046 | 229.897 | 103.194 | 71.3161 | 134.257 | Down |
| Xlr4a     | 356.192 | -1.4056 | 0.60655 | -2.3173 | 0.02049  | 0.2424   | 108.417 | 679.414 | 763.725 | 139.976 | 301.112 | 144.506 | Down |
| Srpk3     | 277.361 | -0.6482 | 0.20395 | -3.1784 | 0.00148  | 0.04105  | 318.352 | 395.583 | 301.983 | 247.258 | 199.091 | 201.899 | Down |
| Pdzd4     | 314.987 | -0.3728 | 0.15639 | -2.3836 | 0.01715  | 0.21666  | 381.431 | 335.257 | 349.716 | 257.475 | 286.255 | 279.788 | Down |
| Gm5640    | 9.23231 | -2.3526 | 1.09006 | -2.1582 | 0.03091  | 0.30734  | 14.7841 | 25.7129 | 5.84483 | 0       | 4.9525  | 4.09946 | Down |
| Mpp1      | 4234.25 | 0.30985 | 0.15697 | 1.97387 | 0.0484   | 0.39439  | 4107.03 | 3780.79 | 3456.24 | 4457.79 | 5445.77 | 4157.88 | Up   |
| 5430427C  | 182.633 | 0.75782 | 0.3496  | 2.1677  | 0.03018  | 0.303    | 171.496 | 133.509 | 102.285 | 233.975 | 310.027 | 144.506 | Up   |
| Arhgef9   | 310.589 | -0.562  | 0.21366 | -2.6301 | 0.00854  | 0.13593  | 331.165 | 432.175 | 347.767 | 233.975 | 299.131 | 219.321 | Down |
| Asb12     | 9.69681 | -3.1251 | 1.3318  | -2.3465 | 0.01895  | 0.23054  | 12.8129 | 30.6577 | 8.76725 | 0       | 5.94301 | 0       | Down |
| Las1l     | 2312.2  | -0.3219 | 0.11062 | -2.9104 | 0.00361  | 0.07634  | 2583.28 | 2470.42 | 2653.55 | 1988.28 | 1970.11 | 2207.56 | Down |
| Tmem28    | 338.506 | 0.37384 | 0.18581 | 2.01198 | 0.04422  | 0.37762  | 335.107 | 275.919 | 273.733 | 338.191 | 428.887 | 379.2   | Up   |
| Kif4      | 141.068 | 0.70634 | 0.27355 | 2.58211 | 0.00982  | 0.14987  | 126.158 | 107.796 | 87.6725 | 218.649 | 156.499 | 149.63  | Up   |
| Gdpd2     | 841.718 | -1.4686 | 0.22634 | -6.4886 | 8.67E-11 | 3.34E-08 | 950.127 | 1421.13 | 1338.47 | 434.233 | 373.419 | 532.93  | Down |
| Tex11     | 499.993 | 0.84272 | 0.2883  | 2.92308 | 0.00347  | 0.07476  | 526.315 | 270.975 | 276.655 | 664.121 | 612.13  | 649.765 | Up   |
| Itgb1bp2  | 397.247 | -2.4482 | 0.41633 | -5.8804 | 4.09E-09 | 1.21E-06 | 415.927 | 1164    | 434.466 | 136.911 | 131.737 | 100.437 | Down |
| Cxcr3     | 285.296 | 0.8804  | 0.38789 | 2.26971 | 0.02322  | 0.26122  | 238.517 | 178.012 | 186.06  | 453.646 | 483.364 | 172.177 | Up   |
| Gm4779    | 2.77376 | -4.8975 | 1.98231 | -2.4706 | 0.01349  | 0.18332  | 1.97122 | 3.95583 | 10.7155 | 0       | 0       | 0       | Down |
| Ercc6l    | 102.875 | 1.19675 | 0.33984 | 3.52152 | 0.00043  | 0.01682  | 70.9638 | 38.5694 | 77.9311 | 159.389 | 152.537 | 117.86  | Up   |
| Gm9109    | 1.96445 | -4.3993 | 2.0663  | -2.1291 | 0.03325  | NA       | 1.97122 | 4.94479 | 4.87069 | 0       | 0       | 0       | Down |
| Cox7b     | 3878.13 | -0.4519 | 0.19322 | -2.3385 | 0.01936  | 0.2341   | 4034.1  | 5340.37 | 4067.03 | 3287.91 | 2725.86 | 3813.53 | Down |
| Tlr13     | 644.153 | 1.10191 | 0.44029 | 2.50271 | 0.01232  | 0.17227  | 522.373 | 443.053 | 263.017 | 710.099 | 1487.73 | 438.643 | Up   |
| Rtl3      | 9.05137 | -2.5175 | 1.0406  | -2.4193 | 0.01555  | 0.20168  | 7.88487 | 24.724  | 13.6379 | 0       | 3.962   | 4.09946 | Down |
| Lpar4     | 80.2613 | -0.7357 | 0.32294 | -2.2781 | 0.02272  | 0.25741  | 90.676  | 110.763 | 99.3621 | 59.2601 | 42.5915 | 78.9147 | Down |
| P2ry10b   | 245.708 | 0.73657 | 0.30307 | 2.43037 | 0.01508  | 0.19729  | 214.863 | 202.736 | 135.405 | 356.582 | 355.59  | 209.073 | Up   |
| Brwd3     | 788.34  | 0.26965 | 0.12694 | 2.12423 | 0.03365  | 0.32398  | 735.264 | 707.105 | 702.354 | 887.879 | 908.289 | 789.147 | Up   |
| Gm6377    | 216.591 | 0.70348 | 0.29454 | 2.38838 | 0.01692  | 0.21459  | 161.64  | 176.035 | 156.836 | 229.888 | 378.371 | 196.774 | Up   |
| Pcdh19    | 316.997 | -0.4813 | 0.19664 | -2.4477 | 0.01438  | 0.19165  | 312.438 | 383.716 | 412.061 | 278.931 | 285.264 | 229.57  | Down |
| Nox1      | 86.98   | 0.86698 | 0.31854 | 2.7217  | 0.00649  | 0.11421  | 81.8055 | 48.4589 | 54.5518 | 130.781 | 109.946 | 96.3374 | Up   |
| Armcx4    | 3242.22 | 0.70997 | 0.23514 | 3.01933 | 0.00253  | 0.05972  | 2532.03 | 2020.44 | 2827.92 | 5157.67 | 3058.67 | 3856.57 | Up   |
| Armcx6    | 155.738 | -0.6321 | 0.19648 | -3.2171 | 0.00129  | 0.03729  | 199.093 | 171.09  | 197.75  | 123.629 | 118.86  | 124.009 | Down |
| Tcp11x2   | 2.3549  | 4.70375 | 1.91361 | 2.45804 | 0.01397  | 0.18776  | 0       | 0       | 0       | 4.0869  | 5.94301 | 4.09946 | Up   |
| Arxes2    | 862.343 | -0.43   | 0.2005  | -2.1448 | 0.03197  | 0.31321  | 880.149 | 1239.16 | 850.423 | 719.295 | 679.484 | 805.545 | Down |
| Arxes1    | 36.3148 | -1.1674 | 0.58774 | -1.9863 | 0.047    | 0.38829  | 39.4243 | 82.0835 | 29.2242 | 23.4997 | 11.886  | 31.7708 | Down |
| Serpina7  | 117.23  | -0.8238 | 0.26933 | -3.0587 | 0.00222  | 0.05418  | 142.913 | 177.023 | 129.56  | 98.0856 | 88.1546 | 67.6411 | Down |
| Cldn2     | 106.583 | -2.0994 | 0.38166 | -5.5008 | 3.78E-08 | 8.33E-06 | 149.813 | 233.394 | 135.405 | 34.7387 | 57.449  | 28.6962 | Down |
| Pak3      | 61.2476 | 0.72146 | 0.34953 | 2.06408 | 0.03901  | 0.3548   | 48.2948 | 56.3706 | 34.0948 | 91.9553 | 75.2781 | 61.492  | Up   |
| Capn6     | 96.2437 | 1.06405 | 0.28378 | 3.74962 | 0.00018  | 0.00861  | 76.8775 | 58.3485 | 51.6293 | 148.15  | 130.746 | 111.71  | Up   |
| Sat1      | 14873   | 0.33106 | 0.12945 | 2.55751 | 0.01054  | 0.15671  | 12043.2 | 14374.5 | 13104.1 | 15683.5 | 15925.3 | 18107.3 | Up   |
| Smpx      | 1189.69 | -4.9484 | 2.22461 | -2.2244 | 0.02612  | 0.27969  | 1134.44 | 4565.03 | 1214.75 | 2.04345 | 221.872 | 0       | Down |
| Klhl34    | 15.0397 | -1.3619 | 0.62107 | -2.1929 | 0.02832  | 0.29049  | 19.7122 | 30.6577 | 14.6121 | 7.15208 | 9.90501 | 8.19893 | Down |
| Pdha1     | 3611.13 | -0.4798 | 0.22303 | -2.151  | 0.03147  | 0.31064  | 3923.71 | 5425.42 | 3269.21 | 2809.74 | 3476.66 | 2762.01 | Down |
| Ctsp2     | 2480.51 | 0.2248  | 0.10236 | 2.19605 | 0.02809  | 0.28953  | 2415.73 | 2228.12 | 2219.09 | 2611.53 | 2647.61 | 2760.99 | Up   |
| Rnf138rt1 | 54.6158 | -1.2335 | 0.5109  | -2.4144 | 0.01576  | 0.20358  | 76.8775 | 66.2602 | 86.6983 | 37.8038 | 11.886  | 48.1687 | Down |
| Vegfd     | 3561.78 | -0.5239 | 0.24366 | -2.1502 | 0.03154  | 0.3109   | 4785.13 | 4557.12 | 3262.39 | 3034.52 | 3590.57 | 2140.94 | Down |
| Asb11     | 153.511 | -2.0639 | 0.63265 | -3.2624 | 0.0011   | 0.03342  | 128.129 | 492.501 | 122.741 | 42.9125 | 103.012 | 31.7708 | Down |
| Tlr8      | 185.184 | 1.00139 | 0.49501 | 2.02294 | 0.04308  | 0.37331  | 181.352 | 119.664 | 69.1638 | 271.779 | 361.533 | 107.611 | Up   |
| Tlr7      | 602.939 | 1.00081 | 0.43648 | 2.2929  | 0.02185  | 0.25197  | 556.869 | 445.031 | 203.595 | 794.902 | 1181.67 | 435.568 | Up   |
| Mid1-ps1  | 123.163 | 5.26933 | 1.43478 | 3.67257 | 0.00024  | 0.01083  | 2.95683 | 8.90062 | 6.81897 | 4.0869  | 300.122 | 416.096 | Up   |

**Supplementary Table 3** DEGs between the Pten<sup>d/d</sup>ELF3<sup>OV</sup> vs WT groups

| gene_id  | baseMean | log2FoldC | lfcSE   | stat    | pvalue   | padj     | WT1     | WT2     | WT3     | PtenddOV | PtenddOV | PtenddOV | change |
|----------|----------|-----------|---------|---------|----------|----------|---------|---------|---------|----------|----------|----------|--------|
| Gm37381  | 28.7775  | -0.9615   | 0.48215 | -1.9943 | 0.04612  | 0.12806  | 28.0575 | 39.2886 | 46.7893 | 18.6609  | 13.7283  | 26.1404  | Down   |
| Rp1      | 1352.22  | -0.5294   | 0.25304 | -2.0923 | 0.03642  | 0.10657  | 1361.27 | 1852.31 | 1579.38 | 1184.97  | 690.641  | 1444.76  | Down   |
| Rgs20    | 66.5851  | -2.3142   | 0.41551 | -5.5695 | 2.55E-08 | 4.27E-07 | 71.5951 | 118.824 | 142.278 | 16.5875  | 20.0645  | 30.162   | Down   |
| Atp6v1h  | 5930.97  | 0.28272   | 0.08529 | 3.31495 | 0.00092  | 0.00518  | 5465.42 | 5397.87 | 5191.7  | 6853.73  | 6459.71  | 6217.4   | Up     |
| Npbwr1   | 150.774  | 2.07574   | 0.44029 | 4.71448 | 2.42E-06 | 2.75E-05 | 27.09   | 71.8694 | 74.4809 | 300.648  | 130.947  | 299.609  | Up     |
| Alka1    | 852.143  | 2.9984    | 0.15859 | 18.9071 | 9.97E-80 | 7.17E-76 | 205.11  | 210.817 | 152.781 | 1622.46  | 1489     | 1432.7   | Up     |
| Adhfe1   | 464.938  | -0.6252   | 0.16615 | -3.7626 | 0.00017  | 0.0012   | 599.851 | 619.993 | 472.667 | 346.263  | 352.712  | 398.139  | Down   |
| Vcpip1   | 3150.63  | 0.20151   | 0.09864 | 2.04281 | 0.04107  | 0.11698  | 2915.08 | 2915.02 | 2963    | 3367.25  | 3107.88  | 3635.53  | Up     |
| 1700034P | 29.6901  | -1.0491   | 0.45338 | -2.3139 | 0.02067  | 0.06842  | 40.6351 | 41.2051 | 38.1953 | 22.8077  | 23.2326  | 12.0648  | Down   |
| Snhg6    | 291.975  | -0.6476   | 0.18243 | -3.5501 | 0.00039  | 0.00247  | 330.886 | 339.224 | 399.141 | 263.326  | 210.149  | 209.123  | Down   |
| Ppp1r42  | 219.669  | -0.4982   | 0.25111 | -1.9839 | 0.04726  | 0.13061  | 233.168 | 295.144 | 243.495 | 207.343  | 126.723  | 212.14   | Down   |
| Arfge1   | 7732.01  | 0.24629   | 0.07331 | 3.35947 | 0.00078  | 0.00453  | 7075.34 | 7065.24 | 7080.46 | 8292.69  | 8234.89  | 8643.43  | Up     |
| Prex2    | 10533.5  | -0.5712   | 0.09251 | -6.175  | 6.61E-10 | 1.50E-08 | 13009   | 11933.2 | 12833.6 | 8159.99  | 9070.2   | 8195.02  | Down   |
| A830018L | 355.107  | -1.1961   | 0.25932 | -4.6127 | 3.98E-06 | 4.30E-05 | 392.806 | 597.953 | 492.72  | 204.233  | 158.404  | 284.528  | Down   |
| Slco5a1  | 126.865  | -0.6062   | 0.26164 | -2.3168 | 0.02052  | 0.06809  | 180.923 | 163.862 | 114.586 | 103.672  | 106.659  | 91.4915  | Down   |
| Prdm14   | 1.91735  | -4.3359   | 2.12192 | -2.0434 | 0.04102  | NA       | 1.935   | 5.74955 | 3.81953 | 0        | 0        | 0        | Down   |
| Lactb2   | 3390.34  | 0.27746   | 0.09577 | 2.89719 | 0.00377  | 0.01708  | 3174.37 | 2966.77 | 3054.67 | 3552.83  | 3997.06  | 3596.32  | Up     |
| Xkr9     | 11.9692  | 6.10204   | 1.37332 | 4.44326 | 8.86E-06 | 8.82E-05 | 0.9675  | 0       | 0       | 18.6609  | 19.0085  | 33.1782  | Up     |
| Sbspon   | 100.389  | -0.8306   | 0.34378 | -2.416  | 0.01569  | 0.05502  | 79.3351 | 177.278 | 128.909 | 67.3865  | 76.0338  | 73.3943  | Down   |
| Ly96     | 395.405  | 0.50939   | 0.18772 | 2.71351 | 0.00666  | 0.02734  | 361.846 | 306.643 | 310.337 | 465.485  | 548.077  | 380.042  | Up     |
| Gdap1    | 6.78673  | -2.7708   | 1.10198 | -2.5143 | 0.01193  | 0.0441   | 7.74001 | 13.4156 | 14.3232 | 2.07343  | 3.16808  | 0        | Down   |
| Gm28153  | 102.571  | -1.2403   | 0.27829 | -4.4567 | 8.32E-06 | 8.35E-05 | 169.313 | 120.741 | 142.278 | 52.8725  | 73.9218  | 56.3024  | Down   |
| Il17f    | 14.8518  | 2.26053   | 1.02607 | 2.2031  | 0.02759  | 0.08609  | 7.74001 | 5.74955 | 1.90977 | 40.4319  | 2.11205  | 31.1674  | Up     |
| Mcm3     | 1170.68  | 0.38274   | 0.16225 | 2.35887 | 0.01833  | 0.06238  | 1169.71 | 803.979 | 1075.2  | 1278.27  | 1392.9   | 1304     | Up     |
| Paqr8    | 3241.66  | 1.44135   | 0.20953 | 6.87901 | 6.03E-12 | 1.93E-10 | 2020.14 | 1391.39 | 1822.87 | 4188.33  | 6152.4   | 3874.81  | Up     |
| Gm28064  | 11.6907  | 3.48533   | 1.06516 | 3.27212 | 0.00107  | 0.00589  | 0       | 1.91652 | 3.81953 | 8.29373  | 38.0169  | 18.0972  | Up     |
| Tmem14a  | 542.148  | -0.3821   | 0.16269 | -2.3486 | 0.01885  | 0.06376  | 579.533 | 665.99  | 594.892 | 540.129  | 475.211  | 397.133  | Down   |
| Gsta3    | 789.332  | -1.2411   | 0.27172 | -4.5677 | 4.93E-06 | 5.22E-05 | 1532.52 | 973.591 | 822.154 | 505.917  | 334.76   | 567.046  | Down   |
| Gm4956   | 5006.48  | -0.8126   | 0.14508 | -5.6014 | 2.13E-08 | 3.60E-07 | 7368.49 | 6018.82 | 5754.12 | 3697.97  | 3162.8   | 4036.68  | Down   |
| Kcnq5    | 623.961  | -0.7014   | 0.18269 | -3.839  | 0.00012  | 0.00091  | 697.569 | 775.231 | 845.071 | 445.788  | 583.982  | 396.128  | Down   |
| Ogfr1    | 2359.02  | 1.00848   | 0.15855 | 6.36059 | 2.01E-10 | 5.09E-09 | 1943.71 | 1398.1  | 1357.84 | 3110.15  | 3234.61  | 3109.7   | Up     |
| Smap1    | 758.279  | 0.37516   | 0.13391 | 2.80147 | 0.00509  | 0.02203  | 736.269 | 604.661 | 639.772 | 812.785  | 917.686  | 838.504  | Up     |
| Gm10925  | 3010.32  | -0.6242   | 0.24925 | -2.5043 | 0.01227  | 0.0452   | 2877.35 | 5424.7  | 2652.66 | 2311.88  | 2381.34  | 2413.97  | Down   |
| Gm29216  | 1095.66  | -0.574    | 0.26631 | -2.1555 | 0.03112  | 0.09425  | 1114.56 | 1917.48 | 900.455 | 860.474  | 763.506  | 1017.47  | Down   |
| Gm9898   | 22.8572  | -1.22     | 0.52788 | -2.3112 | 0.02082  | 0.06879  | 31.9275 | 22.0399 | 42.0148 | 14.514   | 10.5603  | 16.0864  | Down   |
| Prim2    | 518.552  | 0.48114   | 0.15439 | 3.11646 | 0.00183  | 0.00925  | 484.718 | 367.013 | 446.885 | 629.287  | 609.327  | 574.084  | Up     |
| Bend6    | 175.146  | 1.00378   | 0.25187 | 3.98533 | 6.74E-05 | 0.00054  | 127.71  | 115.949 | 105.992 | 178.315  | 295.687  | 227.221  | Up     |
| Dst      | 8879.76  | -0.4411   | 0.08993 | -4.9049 | 9.35E-07 | 1.16E-05 | 10032   | 10504.4 | 10143.7 | 6993.69  | 7945.53  | 7659.14  | Down   |
| Ptpn18   | 856.377  | 0.885     | 0.14045 | 6.30132 | 2.95E-10 | 7.20E-09 | 556.313 | 692.821 | 555.742 | 1173.56  | 1116.22  | 1043.61  | Up     |
| 4930568A | 6.93659  | 2.38073   | 1.18485 | 2.00931 | 0.0445   | 0.12451  | 0       | 4.79129 | 1.90977 | 17.6242  | 4.2241   | 13.0702  | Up     |
| Plekhh2  | 9657.13  | 0.85974   | 0.11777 | 7.29997 | 2.88E-13 | 1.13E-11 | 7847.4  | 6283.3  | 6455.01 | 12881.2  | 12507.6  | 11968.3  | Up     |
| Hs6st1   | 1386.71  | 0.7382    | 0.14086 | 5.24083 | 1.60E-07 | 2.29E-06 | 1125.2  | 962.092 | 1031.27 | 1493.91  | 1759.34  | 1948.47  | Up     |
| Uggt1    | 5033.73  | 0.47276   | 0.09681 | 4.88359 | 1.04E-06 | 1.28E-05 | 4586.92 | 4028.52 | 4033.43 | 5723.71  | 6045.75  | 5784.07  | Up     |
| Neur13   | 1922.85  | 0.43653   | 0.12482 | 3.49728 | 0.00047  | 0.00294  | 1819.87 | 1449.85 | 1632.85 | 2098.31  | 2177.52  | 2358.67  | Up     |
| Sema4c   | 1699.49  | -0.3671   | 0.11596 | -3.1656 | 0.00155  | 0.00804  | 1750.21 | 1880.1  | 2113.16 | 1489.76  | 1548.13  | 1415.6   | Down   |
| Cox5b    | 2232.94  | -0.3383   | 0.13453 | -2.5148 | 0.01191  | 0.04407  | 2223.32 | 2865.19 | 2391.98 | 2070.32  | 2038.13  | 1808.72  | Down   |
| Zap70    | 597.093  | -0.808    | 0.21237 | -3.8046 | 0.00014  | 0.00103  | 841.726 | 722.527 | 716.162 | 484.146  | 306.247  | 511.749  | Down   |
| Tmem131  | 4590.36  | 0.27658   | 0.08741 | 3.16411 | 0.00156  | 0.00807  | 4289.9  | 4097.51 | 4067.8  | 4781.33  | 5017.18  | 5288.41  | Up     |
| Vwa3b    | 1101.6   | -0.5047   | 0.24869 | -2.0294 | 0.04242  | 0.11998  | 1192.93 | 1390.43 | 1293.87 | 1005.61  | 555.469  | 1171.29  | Down   |
| Mgat4a   | 1715.18  | 0.75147   | 0.09911 | 7.58228 | 3.40E-14 | 1.55E-12 | 1185.19 | 1330.06 | 1319.65 | 2122.16  | 2133.17  | 2200.82  | Up     |
| 2010300C | 3321.53  | 0.51042   | 0.1349  | 3.78355 | 0.00015  | 0.00111  | 2966.36 | 2754.99 | 2498.93 | 3975.81  | 3366.61  | 4366.46  | Up     |
| Mitd1    | 1324.63  | 0.2404    | 0.11224 | 2.14185 | 0.03221  | 0.09671  | 1208.41 | 1176.74 | 1258.54 | 1529.16  | 1301.02  | 1473.92  | Up     |
| Aff3     | 1852.7   | -0.4565   | 0.11846 | -3.8539 | 0.00012  | 0.00087  | 2203    | 1951.97 | 2275.49 | 1495.98  | 1481.6   | 1708.18  | Down   |
| Lonrf2   | 31.5328  | -1.328    | 0.60735 | -2.1865 | 0.02878  | 0.0891   | 26.1225 | 80.4937 | 28.6465 | 14.514   | 25.3446  | 14.0756  | Down   |
| Pdcl3    | 3939.93  | -0.3992   | 0.11488 | -3.4751 | 0.00051  | 0.00316  | 4034.48 | 4546.94 | 4863.22 | 3542.46  | 3517.62  | 3134.84  | Down   |
| Npas2    | 441.543  | -1.296    | 0.4204  | -3.0828 | 0.00205  | 0.01017  | 221.558 | 957.3   | 703.749 | 224.967  | 225.989  | 315.696  | Down   |
| Cnot11   | 1975.75  | 0.21684   | 0.0969  | 2.23785 | 0.02523  | 0.08028  | 1882.76 | 1901.19 | 1698.74 | 2175.03  | 2102.55  | 2094.25  | Up     |
| Rnf149   | 2442.93  | 1.7212    | 0.15684 | 10.9743 | 5.08E-28 | 8.98E-26 | 1322.57 | 1145.12 | 943.424 | 3297.79  | 4046.69  | 3901.96  | Up     |
| Creg2    | 120.031  | 1.2933    | 0.4336  | 2.9827  | 0.00286  | 0.01349  | 93.8476 | 88.1598 | 26.7367 | 167.948  | 139.395  | 204.096  | Up     |
| Il1r1    | 2703.48  | -0.3313   | 0.12187 | -2.7183 | 0.00656  | 0.02704  | 2683.85 | 3195.79 | 3157.8  | 2181.25  | 2565.09  | 2437.09  | Down   |
| Il1r2    | 963.615  | 0.40357   | 0.18408 | 2.19235 | 0.02835  | 0.08808  | 655.966 | 1027.25 | 805.921 | 1017.02  | 1076.09  | 1199.44  | Up     |
| Il18r1   | 8883.91  | 0.40544   | 0.1274  | 3.18243 | 0.00146  | 0.00767  | 6461.94 | 8223.78 | 8245.41 | 9640.42  | 10687    | 10045    | Up     |
| Il18rap  | 743.7    | 0.8437    | 0.16496 | 5.1146  | 3.14E-07 | 4.31E-06 | 495.361 | 596.995 | 504.178 | 983.843  | 1084.54  | 797.283  | Up     |
| Slc9a4   | 765.427  | 2.14879   | 0.33959 | 6.32769 | 2.49E-10 | 6.17E-09 | 449.888 | 242.439 | 152.781 | 1250.28  | 1525.96  | 971.217  | Up     |
| Slc9a2   | 353.065  | -0.6312   | 0.18305 | -3.4483 | 0.00056  | 0.00343  | 457.628 | 473.38  | 356.171 | 264.363  | 310.471  | 256.377  | Down   |
| Tmem182  | 474.485  | -6.0373   | 1.45275 | -4.1558 | 3.24E-05 | 0.00028  | 590.176 | 1811.11 | 402.961 | 14.514   | 0        | 28.1512  | Down   |
| Mrps9    | 2158.73  | -0.3206   | 0.10136 | -3.1629 | 0.00156  | 0.0081   | 2552.27 | 2365.94 | 2274.53 | 1853.65  | 2034.96  | 1871.05  | Down   |
| Fhl2     | 892.142  | -1.3997   | 0.67882 | -2.0619 | 0.03922  | 0.11276  | 687.894 | 2360.19 | 833.613 | 543.239  | 250.278  | 677.64   | Down   |
| Nck2     | 2201.33  | -0.2999   | 0.0882  | -3.4001 | 0.00067  | 0.004    | 2379.09 | 2400.44 | 2508.48 | 1954.21  | 1917.74  | 2048     | Down   |
| Ecrq4    | 135.354  | 1.71049   | 0.34232 | 4.99679 | 5.83E-07 | 7.61E-06 | 54.1801 | 90.0763 | 45.8344 | 256.069  | 146.788  | 219.177  | Up     |
| Uxs1     | 1786.08  | 0.32314   | 0.09177 | 3.52108 | 0.00043  | 0.00272  | 1579.93 | 1585.92 | 1594.65 | 1936.59  | 2093.04  | 1926.35  | Up     |
| Tpp2     | 3893.19  | 0.28252   | 0.10012 | 2.82169 | 0.00478  | 0.02088  | 3484.94 | 3566.64 | 3488.19 | 3891.83  | 4332.87  | 4594.68  | Up     |
| Ercc5    | 1887.45  | -0.312    | 0.10962 | -2.8461 | 0.00443  | 0.01956  | 2099.48 | 1896.39 | 2276.44 | 1686.74  | 1648.46  | 1717.22  | Down   |
| Mettl21e | 117.944  | -0.7625   | 0.26759 | -2.8497 | 0.00438  | 0.01937  | 128.678 | 168.654 | 148.007 | 74.6435  | 77.0899  | 110.594  | Down   |
| Gulp1    | 1411.23  | -0.5544   | 0.10567 | -5.2463 | 1.55E-07 | 2.23E-06 | 1677.65 | 1648.2  | 1711.15 | 1168.38  | 1213.37  | 1048.63  | Down   |
| Col3a1   | 11687.2  | 0.47634   | 0.20019 | 2.37944 | 0.01734  | 0.0596   | 6847.01 | 11237.  |         |          |          |          |        |





|          |         |         |         |         |          |          |         |         |         |         |         |         |      |
|----------|---------|---------|---------|---------|----------|----------|---------|---------|---------|---------|---------|---------|------|
| Tsn      | 3900.32 | 0.25879 | 0.08945 | 2.89299 | 0.00382  | 0.01727  | 3377.55 | 3629.88 | 3646.7  | 4187.3  | 4457.48 | 4103.04 | Up   |
| Clasp1   | 2726.38 | -0.388  | 0.14669 | -2.6453 | 0.00816  | 0.03235  | 2704.17 | 3677.8  | 2890.43 | 2229.98 | 2555.58 | 2300.36 | Down |
| Tfcp2l1  | 2484.72 | 0.47732 | 0.14277 | 3.3432  | 0.00083  | 0.00475  | 1764.72 | 2043.97 | 2423.49 | 2801.21 | 2776.29 | 3098.65 | Up   |
| Gm29455  | 40.4036 | -1.6912 | 0.55463 | -3.0492 | 0.00229  | 0.01118  | 46.4401 | 85.285  | 53.4734 | 10.3672 | 12.6723 | 34.1836 | Down |
| Inhbb    | 2111.34 | 0.64948 | 0.10253 | 6.3346  | 2.38E-10 | 5.93E-09 | 1711.51 | 1540.88 | 1679.64 | 2437.32 | 2564.03 | 2734.69 | Up   |
| Ralb     | 3941.34 | 0.415   | 0.12628 | 3.28625 | 0.00102  | 0.00565  | 3728.75 | 2944.73 | 3461.45 | 4457.88 | 4856.66 | 4198.55 | Up   |
| Gm27184  | 71.7929 | -0.7741 | 0.28468 | -2.7192 | 0.00654  | 0.02699  | 100.62  | 81.452  | 89.759  | 60.1295 | 47.5211 | 51.2754 | Down |
| Epb41l5  | 6916.08 | 0.73128 | 0.11451 | 6.38595 | 1.70E-10 | 4.38E-09 | 5819.52 | 4637.97 | 5142.04 | 8557.05 | 8992.06 | 8347.84 | Up   |
| Tmem177  | 472.236 | -0.4139 | 0.1344  | -3.0795 | 0.00207  | 0.01026  | 499.231 | 553.873 | 565.291 | 409.503 | 423.466 | 382.052 | Down |
| Cfap221  | 670.737 | -0.8258 | 0.22199 | -3.7199 | 0.0002   | 0.00139  | 832.051 | 909.387 | 831.703 | 471.706 | 342.152 | 637.424 | Down |
| Sctr     | 6.72758 | -5.1474 | 1.52326 | -3.3792 | 0.00073  | 0.00426  | 7.74001 | 22.0399 | 9.54883 | 1.03672 | 0       | 0       | Down |
| Tmem37   | 1843.79 | 0.67298 | 0.19875 | 3.38607 | 0.00071  | 0.00418  | 1708.61 | 1409.6  | 1145.86 | 2509.89 | 2532.35 | 1756.44 | Up   |
| Dbi      | 4781.28 | 0.53384 | 0.14302 | 3.73259 | 0.00019  | 0.00133  | 3482.04 | 4588.14 | 3649.56 | 5513.25 | 6252.73 | 5201.94 | Up   |
| 3110009E | 343.114 | -0.387  | 0.14091 | -2.7465 | 0.00602  | 0.02525  | 384.098 | 383.303 | 399.141 | 316.198 | 290.407 | 285.534 | Down |
| C1ql2    | 3.72102 | -3.2766 | 1.65609 | -1.9785 | 0.04787  | 0.13199  | 11.61   | 2.87478 | 5.7293  | 0       | 2.11205 | 0       | Down |
| Marco    | 4048.22 | 2.89507 | 0.88101 | 3.28607 | 0.00102  | 0.00565  | 2055.94 | 605.619 | 216.758 | 4554.29 | 8266.57 | 8590.15 | Up   |
| Actr3    | 17868.9 | 0.61943 | 0.09947 | 6.22729 | 4.75E-10 | 1.10E-08 | 13881.7 | 14250.3 | 14139.9 | 20742.6 | 23936.9 | 20261.8 | Up   |
| Slc35f5  | 3931.67 | 0.27077 | 0.1086  | 2.49322 | 0.01266  | 0.04632  | 3353.36 | 3775.54 | 3562.67 | 4118.87 | 4056.19 | 4723.37 | Up   |
| Gpr39    | 391.83  | 1.10966 | 0.1636  | 6.7827  | 1.18E-11 | 3.66E-10 | 280.575 | 218.483 | 245.405 | 500.734 | 583.982 | 521.803 | Up   |
| Lypd1    | 55.768  | 1.76739 | 0.44187 | 3.99975 | 6.34E-05 | 0.00051  | 40.6351 | 13.4156 | 21.9623 | 80.8638 | 79.2019 | 98.5293 | Up   |
| Mgat5    | 1438.78 | 0.61284 | 0.14818 | 4.13586 | 3.54E-05 | 0.0003   | 1179.38 | 1210.28 | 1023.63 | 1555.07 | 1627.34 | 2036.94 | Up   |
| Tmem163  | 2027.82 | 1.02351 | 0.23508 | 4.35378 | 1.34E-05 | 0.00013  | 1763.76 | 1175.78 | 1072.33 | 2533.73 | 2141.62 | 3479.69 | Up   |
| Zranb3   | 407.537 | 1.44626 | 0.22109 | 6.54142 | 6.09E-11 | 1.67E-09 | 266.063 | 216.566 | 173.789 | 552.57  | 725.489 | 510.744 | Up   |
| Ubxn4    | 7278.46 | 0.22813 | 0.07784 | 2.93087 | 0.00338  | 0.0156   | 6553.85 | 6620.61 | 6938.18 | 7696.58 | 7788.19 | 8073.37 | Up   |
| Mcm6     | 603.268 | 0.84004 | 0.19468 | 4.31492 | 1.60E-05 | 0.00015  | 544.703 | 348.806 | 403.915 | 771.317 | 703.313 | 847.553 | Up   |
| Cd55b    | 127.817 | -1.2147 | 0.24928 | -4.8727 | 1.10E-06 | 1.34E-05 | 206.078 | 154.28  | 175.698 | 86.0474 | 63.3615 | 81.4375 | Down |
| Gm16083  | 91.2374 | -0.6748 | 0.33489 | -2.0151 | 0.04389  | 0.12326  | 87.0751 | 103.492 | 146.097 | 73.6068 | 50.6892 | 86.4645 | Down |
| C4bp     | 67.0433 | 3.02062 | 0.64446 | 4.68708 | 2.77E-06 | 3.11E-05 | 8.70751 | 27.7895 | 7.63906 | 140.993 | 41.185  | 175.945 | Up   |
| Gm29427  | 60.2742 | 1.18803 | 0.3822  | 3.10837 | 0.00188  | 0.00948  | 25.155  | 49.8294 | 35.3307 | 98.488  | 63.3615 | 89.4807 | Up   |
| AA98686C | 7904.11 | 0.57372 | 0.12623 | 4.54518 | 5.49E-06 | 5.75E-05 | 6832.5  | 5672.89 | 6553.36 | 10146.3 | 8319.37 | 9900.18 | Up   |
| Gm28856  | 83.0714 | 1.39688 | 0.31549 | 4.42764 | 9.53E-06 | 9.38E-05 | 34.8301 | 56.5373 | 45.8344 | 109.892 | 104.547 | 146.789 | Up   |
| Gm15848  | 885.448 | 1.91327 | 0.30137 | 6.34846 | 2.17E-10 | 5.44E-09 | 417.961 | 434.091 | 262.593 | 1601.73 | 804.691 | 1791.62 | Up   |
| Pigr     | 32476.3 | 3.15373 | 0.29768 | 10.5943 | 3.17E-26 | 4.75E-24 | 4642.07 | 8719.2  | 6322.28 | 64815.5 | 33308.1 | 77050.9 | Up   |
| Ctse     | 842.984 | 0.53247 | 0.14773 | 3.60424 | 0.00031  | 0.00206  | 781.741 | 696.654 | 589.163 | 1074.04 | 944.087 | 972.223 | Up   |
| Rab7b    | 429.042 | 1.00071 | 0.25535 | 3.91896 | 8.89E-05 | 0.00069  | 402.481 | 229.982 | 225.352 | 577.451 | 647.344 | 491.641 | Up   |
| Slc26a9  | 5854.55 | 1.19511 | 0.20046 | 5.96172 | 2.50E-09 | 5.11E-08 | 3513    | 3143.09 | 4021.97 | 7798.18 | 10541.2 | 6109.82 | Up   |
| Pm20d1   | 520.184 | 0.53942 | 0.17973 | 3.00134 | 0.00269  | 0.0128   | 416.026 | 474.338 | 381.953 | 565.01  | 542.797 | 740.98  | Up   |
| Slc41a1  | 3023.54 | 0.30059 | 0.13143 | 2.28712 | 0.02219  | 0.07239  | 2995.38 | 2823.03 | 2310.82 | 3193.08 | 3235.66 | 3583.25 | Up   |
| Elk4     | 57.9415 | 1.11704 | 0.43825 | 2.54887 | 0.01081  | 0.04079  | 57.0826 | 33.5391 | 19.0977 | 83.974  | 86.5941 | 67.3619 | Up   |
| Mfsd4a   | 1892.09 | 3.08916 | 0.21281 | 14.5159 | 9.61E-48 | 7.85E-45 | 482.783 | 445.59  | 265.457 | 3733.21 | 3167.02 | 3258.5  | Up   |
| Cdk18    | 1851.56 | 0.44083 | 0.12771 | 3.45196 | 0.00056  | 0.00339  | 1660.23 | 1457.51 | 1594.65 | 2266.26 | 2275.73 | 1854.96 | Up   |
| Lemd1    | 71.3633 | 3.11944 | 0.70522 | 4.42338 | 9.72E-06 | 9.55E-05 | 15.48   | 21.0817 | 7.63906 | 161.728 | 22.1765 | 200.075 | Up   |
| Klhdc8a  | 798.991 | 0.57965 | 0.21995 | 2.63542 | 0.0084   | 0.03309  | 468.271 | 858.6   | 594.892 | 1018.05 | 947.255 | 906.872 | Up   |
| Nuak2    | 1098.32 | 0.60548 | 0.12453 | 4.86215 | 1.16E-06 | 1.41E-05 | 836.889 | 910.346 | 866.079 | 1389.2  | 1416.13 | 1171.29 | Up   |
| Tmcc2    | 8983.38 | -0.8951 | 0.14558 | -6.1486 | 7.82E-10 | 1.75E-08 | 10047.5 | 11413.8 | 13590.8 | 6027.47 | 7042.63 | 5778.04 | Down |
| Lrrn2    | 175.271 | -1.5378 | 0.34735 | -4.4272 | 9.55E-06 | 9.39E-05 | 212.85  | 374.679 | 194.796 | 102.635 | 58.0814 | 108.583 | Down |
| Pik3c2b  | 1266.12 | 0.50849 | 0.22855 | 2.22481 | 0.02609  | 0.08238  | 781.741 | 1198.78 | 1155.41 | 1271.01 | 1251.39 | 1938.41 | Up   |
| Ppp1r15b | 6946.14 | 0.30218 | 0.07716 | 3.91618 | 9.00E-05 | 0.00069  | 6281.02 | 5996.78 | 6386.26 | 7524.48 | 7699.48 | 7788.84 | Up   |
| Plekha6  | 4296.87 | 0.40483 | 0.1377  | 2.93984 | 0.00328  | 0.0152   | 3461.72 | 4290.12 | 3342.09 | 4671.44 | 4593.71 | 5422.13 | Up   |
| Sox13    | 5160.67 | -0.4117 | 0.13728 | -2.999  | 0.00271  | 0.01288  | 5086.16 | 5894.25 | 6695.64 | 4265.05 | 4896.79 | 4126.17 | Down |
| Optc     | 20.953  | -1.9419 | 0.68157 | -2.8492 | 0.00438  | 0.0194   | 19.35   | 39.2886 | 41.06   | 4.14686 | 15.8404 | 6.03241 | Down |
| Gm15851  | 72.8607 | -1.6036 | 0.34951 | -4.5881 | 4.47E-06 | 4.78E-05 | 74.4976 | 130.323 | 124.135 | 32.1382 | 34.8488 | 41.2214 | Down |
| Chil1    | 102484  | 2.98294 | 0.21133 | 14.1151 | 3.07E-45 | 2.07E-42 | 31890.8 | 19761.2 | 17392.2 | 192966  | 174811  | 178082  | Up   |
| Mybph    | 13.4589 | 1.68396 | 0.72283 | 2.32967 | 0.01982  | 0.06634  | 3.87001 | 6.70781 | 8.59395 | 24.8812 | 10.5603 | 26.1404 | Up   |
| Ppfia4   | 517.519 | 0.6938  | 0.15107 | 4.59274 | 4.37E-06 | 4.69E-05 | 419.896 | 432.175 | 334.209 | 651.058 | 649.456 | 618.322 | Up   |
| Tmem183  | 4327.7  | 0.25868 | 0.09432 | 2.74261 | 0.0061   | 0.02549  | 3867.1  | 3747.75 | 4207.21 | 4644.49 | 4941.14 | 4558.49 | Up   |
| Cyb5r1   | 3078.3  | 0.39278 | 0.13657 | 2.876   | 0.00403  | 0.01808  | 2891.86 | 2464.64 | 2628.79 | 3446.04 | 3998.11 | 3040.33 | Up   |
| Gm15454  | 22.2204 | -1.2117 | 0.53058 | -2.2837 | 0.02239  | 0.07286  | 29.9925 | 33.5391 | 29.6014 | 7.25701 | 15.8404 | 17.0918 | Down |
| Syt2     | 92.2809 | 1.353   | 0.64769 | 2.08896 | 0.03671  | 0.10724  | 67.7251 | 46.9547 | 41.06   | 108.855 | 262.95  | 26.1404 | Up   |
| Lgr6     | 501.47  | -2.8219 | 0.63128 | -4.4702 | 7.82E-06 | 7.89E-05 | 545.671 | 1651.08 | 439.246 | 103.672 | 161.572 | 107.578 | Down |
| Ptpn7    | 369.764 | 0.71673 | 0.14881 | 4.81628 | 1.46E-06 | 1.74E-05 | 297.023 | 255.855 | 286.465 | 430.237 | 459.371 | 489.63  | Up   |
| Gm4204   | 1985.58 | -0.4057 | 0.10281 | -3.9461 | 7.94E-05 | 0.00062  | 2361.67 | 2192.5  | 2234.43 | 1690.88 | 1836.43 | 1597.58 | Down |
| Rnpep    | 3222.84 | 0.80486 | 0.11927 | 6.74794 | 1.50E-11 | 4.57E-10 | 2486.48 | 2420.56 | 2132.25 | 4180.04 | 4427.91 | 3689.82 | Up   |
| Lmod1    | 398.436 | -1.37   | 0.22783 | -6.0131 | 1.82E-09 | 3.80E-08 | 465.368 | 697.612 | 560.516 | 222.894 | 269.286 | 174.94  | Down |
| Tnnt2    | 5902.36 | -5.6321 | 0.70513 | -7.9873 | 1.38E-15 | 7.51E-14 | 8901.98 | 18944.8 | 6867.52 | 244.665 | 79.2019 | 376.02  | Down |
| Kif21b   | 1262.2  | 0.46199 | 0.15191 | 3.04131 | 0.00236  | 0.01144  | 1065.22 | 1157.58 | 962.522 | 1283.45 | 1713.93 | 1390.47 | Up   |
| Mroh3    | 9.3706  | 2.10997 | 0.87496 | 2.4115  | 0.01589  | 0.05559  | 3.87001 | 4.79129 | 1.90977 | 8.29373 | 24.8886 | 13.0702 | Up   |
| Inava    | 259.768 | 0.80732 | 0.2795  | 2.88844 | 0.00387  | 0.01748  | 116.1   | 245.314 | 205.3   | 302.721 | 366.441 | 322.734 | Up   |
| Camsap2  | 338.858 | 0.61707 | 0.25877 | 2.38459 | 0.0171   | 0.05899  | 267.03  | 220.399 | 315.111 | 339.006 | 331.592 | 560.008 | Up   |
| 9230116N | 95.9608 | -0.8178 | 0.30233 | -2.705  | 0.00683  | 0.02798  | 78.3676 | 75.7024 | 75.4357 | 49.7624 | 43.297  | 37.1998 | Down |
| Ptprc    | 6430.82 | 0.61312 | 0.13956 | 4.39318 | 1.12E-05 | 0.00011  | 5750.83 | 5079.73 | 4423.02 | 7011.31 | 8711.15 | 7608.87 | Up   |
| Atp6v1g3 | 35.8647 | 1.83593 | 0.46139 | 3.97911 | 6.92E-05 | 0.00055  | 17.415  | 13.4156 | 16.233  | 49.7624 | 78.1459 | 40.216  | Up   |
| Dennd1b  | 1618.29 | 0.37262 | 0.1182  | 3.15256 | 0.00162  | 0.00835  | 1345.79 | 1573.46 | 1312.01 | 1766.56 | 1928.3  | 1783.58 | Up   |
| Aspm     | 99.145  | 0.70866 | 0.28479 | 2.48838 | 0.01283  | 0.04687  | 92.8801 | 77.619  | 55.3832 | 125.443 | 109.827 | 133.718 | Up   |
| 4930590L | 3.53495 | -4.1828 | 1.82398 | -2.2932 | 0.02183  | 0.07146  | 3.87001 | 14.3739 | 1.90977 | 0       | 1.05603 | 0       | Down |
| Ro60     | 5019.16 | 0.25202 | 0.09462 | 2.66358 | 0.00773  | 0.03093  | 4645.94 | 4473.15 | 4626.41 | 5129.67 | 5902.13 | 5337.67 | Up   |
| Rgs1     | 648.908 | 1.71651 |         |         |          |          |         |         |         |         |         |         |      |



|           |         |         |         |         |          |          |         |         |         |           |         |         |      |
|-----------|---------|---------|---------|---------|----------|----------|---------|---------|---------|-----------|---------|---------|------|
| Cfap126   | 2545.74 | -0.436  | 0.21063 | -2.0697 | 0.03848  | 0.11122  | 2612.25 | 3237.96 | 2932.45 | 2414.51   | 1476.32 | 2600.97 | Down |
| Pcp4I1    | 8540.15 | -0.7346 | 0.20878 | -3.5184 | 0.00043  | 0.00274  | 8359.21 | 13247   | 10399.6 | 6783.23   | 4886.23 | 7565.64 | Down |
| Fcer1g    | 2705.58 | 1.50582 | 0.17502 | 8.60378 | 7.71E-18 | 5.76E-16 | 1497.69 | 1587.83 | 1142.04 | 3777.79   | 4759.51 | 3468.63 | Up   |
| Ndufs2    | 8323.13 | -0.3147 | 0.15441 | -2.0381 | 0.04154  | 0.11807  | 8115.4  | 11392.7 | 8173.8  | 7698.65   | 7549.53 | 7008.65 | Down |
| B4galt3   | 2140.29 | 0.41478 | 0.09939 | 4.1734  | 3.00E-05 | 0.00026  | 1726.99 | 1795.78 | 1981.38 | 2409.33   | 2427.8  | 2500.43 | Up   |
| Nit1      | 2382.93 | 0.213   | 0.10493 | 2.02987 | 0.04237  | 0.11987  | 2150.76 | 2322.82 | 2148.49 | 2774.25   | 2389.79 | 2511.49 | Up   |
| Nectin4   | 1085.74 | 0.35499 | 0.10042 | 3.53517 | 0.00041  | 0.00259  | 965.566 | 956.342 | 936.74  | 1195.33   | 1179.58 | 1280.88 | Up   |
| Arhgap30  | 2041.82 | 1.00475 | 0.15244 | 6.59113 | 4.36E-11 | 1.22E-09 | 1558.64 | 1321.44 | 1194.56 | 2510.93   | 3143.79 | 2521.55 | Up   |
| Tstd1     | 271.53  | -0.7085 | 0.17337 | -4.0865 | 4.38E-05 | 0.00036  | 297.023 | 359.347 | 354.262 | 224.967   | 198.533 | 195.048 | Down |
| F11r      | 13912.9 | 0.30639 | 0.10001 | 3.06357 | 0.00219  | 0.01074  | 13446.3 | 11369.7 | 12507.1 | 15566.3   | 15869.9 | 14718.1 | Up   |
| Itln1     | 316.577 | 6.02117 | 1.87288 | 3.21492 | 0.0013   | 0.00698  | 5.80501 | 22.9982 | 0       | 481.036   | 24.2886 | 1365.33 | Up   |
| Cd244a    | 422.354 | 1.01646 | 0.17235 | 5.89777 | 3.68E-09 | 7.35E-08 | 267.03  | 334.432 | 236.811 | 555.68    | 588.206 | 551.965 | Up   |
| Slamf7    | 352.774 | 0.99665 | 0.16126 | 6.18054 | 6.39E-10 | 1.45E-08 | 244.778 | 213.692 | 248.27  | 470.669   | 423.466 | 515.771 | Up   |
| Cd48      | 1502.75 | 0.82228 | 0.15961 | 5.15169 | 2.58E-07 | 3.59E-06 | 1246.14 | 1077.08 | 933.875 | 1906.52   | 2184.92 | 1667.96 | Up   |
| Slamf1    | 88.8506 | -0.8339 | 0.33038 | -2.5242 | 0.0116   | 0.04318  | 83.2051 | 153.321 | 105.037 | 66.3498   | 52.8013 | 72.3889 | Down |
| Cd84      | 2525.92 | 1.84241 | 0.20421 | 9.02193 | 1.85E-19 | 1.55E-17 | 1396.1  | 1024.38 | 884.222 | 3633.69   | 4823.92 | 3393.23 | Up   |
| Gm10521   | 37.2193 | 1.8294  | 0.49781 | 3.67489 | 0.00024  | 0.00161  | 20.3175 | 19.1652 | 9.54883 | 45.6155   | 83.426  | 45.243  | Up   |
| Ncstn     | 7158.4  | 0.54398 | 0.08873 | 6.13057 | 8.76E-10 | 1.95E-08 | 6154.28 | 5780.22 | 5539.28 | 8754.03   | 8593.93 | 8128.67 | Up   |
| Igsf8     | 2254.27 | 0.73027 | 0.20113 | 3.63088 | 0.00028  | 0.00188  | 2268.79 | 1410.56 | 1407.5  | 2741.08   | 3084.65 | 2613.04 | Up   |
| Kcnj10    | 82.2299 | 1.82865 | 0.318   | 5.75056 | 8.90E-09 | 1.63E-07 | 26.1225 | 41.2051 | 41.06   | 124.406   | 108.771 | 151.816 | Up   |
| Slamf9    | 618.809 | 1.43464 | 0.21965 | 6.53149 | 6.51E-11 | 1.78E-09 | 433.441 | 321.017 | 248.27  | 796.198   | 894.453 | 1019.48 | Up   |
| Igsf9     | 363.482 | 0.5339  | 0.15057 | 3.54591 | 0.00039  | 0.0025   | 292.185 | 310.476 | 288.375 | 393.952   | 421.354 | 474.549 | Up   |
| Tagln2    | 27453.6 | 0.40779 | 0.14296 | 2.8524  | 0.00434  | 0.01924  | 25556.6 | 20708   | 24532.9 | 31112.9   | 35921.8 | 26889.4 | Up   |
| Vsig8     | 23.8084 | 0.98319 | 0.48002 | 2.04824 | 0.04054  | 0.11572  | 13.545  | 20.1234 | 14.3232 | 36.2851   | 26.4006 | 32.1728 | Up   |
| Slamf8    | 158.918 | 0.72213 | 0.22215 | 3.25061 | 0.00115  | 0.00629  | 101.588 | 139.906 | 118.405 | 186.609   | 184.804 | 222.194 | Up   |
| Aim2      | 845.831 | 1.13691 | 0.22548 | 5.0422  | 4.60E-07 | 6.11E-06 | 593.078 | 585.496 | 407.735 | 1138.31   | 1462.6  | 887.769 | Up   |
| Ifi214    | 79.3395 | -0.7045 | 0.33994 | -2.0725 | 0.03822  | 0.11056  | 128.678 | 82.4102 | 84.0297 | 55.9827   | 47.5211 | 77.4159 | Down |
| Ifi213    | 1219.58 | -0.4411 | 0.13879 | -3.178  | 0.00148  | 0.00777  | 1375.79 | 1365.52 | 1472.43 | 868.768   | 1132.06 | 1102.92 | Down |
| Ifi209    | 993.283 | -0.2567 | 0.12814 | -2.0033 | 0.04514  | 0.12593  | 1124.24 | 1169.08 | 951.063 | 874.988   | 890.229 | 950.104 | Down |
| Ifi207    | 830.582 | 1.07989 | 0.20214 | 5.34242 | 9.17E-08 | 1.37E-06 | 561.151 | 652.574 | 386.728 | 1233.69   | 1044.41 | 1104.94 | Up   |
| Ifi204    | 495.616 | 0.66852 | 0.28877 | 2.31504 | 0.02061  | 0.06831  | 424.733 | 508.835 | 214.849 | 685.269   | 563.918 | 576.095 | Up   |
| Ifi203-ps | 390.979 | 0.55356 | 0.23192 | 2.3868  | 0.017    | 0.05872  | 416.026 | 274.062 | 260.683 | 438.531   | 407.626 | 548.949 | Up   |
| Ifi211    | 238.672 | 0.65326 | 0.28467 | 2.29483 | 0.02174  | 0.07122  | 147.06  | 257.772 | 151.826 | 332.786   | 223.877 | 318.712 | Up   |
| Spta1     | 69.1578 | -2.0029 | 0.48246 | -4.1515 | 3.30E-05 | 0.00028  | 76.4326 | 183.986 | 71.6162 | 21.771    | 38.0169 | 23.1242 | Down |
| Fmn2      | 318.786 | -1.0249 | 0.23784 | -4.3092 | 1.64E-05 | 0.00015  | 565.988 | 380.429 | 336.119 | 229.114   | 186.916 | 214.15  | Down |
| Rgs7      | 42.6179 | -2.7986 | 0.66039 | -4.2378 | 2.26E-05 | 0.0002   | 42.5701 | 138.948 | 42.0148 | 16.5875   | 10.5603 | 5.027   | Down |
| Kmo       | 316.373 | 0.4757  | 0.23721 | 2.00542 | 0.04492  | 0.12549  | 355.073 | 220.399 | 218.668 | 332.786   | 360.105 | 411.209 | Up   |
| Opn3      | 171.054 | 1.09789 | 0.26297 | 4.17496 | 2.98E-05 | 0.00026  | 136.418 | 113.075 | 77.3455 | 266.436   | 224.933 | 208.118 | Up   |
| Wdr64     | 2.23099 | 4.65934 | 2.03473 | 2.2899  | 0.02203  | NA       | 0       | 0       | 0       | 2.07343   | 5.28013 | 6.03241 | Up   |
| Adss      | 6852.34 | 0.29334 | 0.0773  | 3.7947  | 0.00015  | 0.00107  | 6212.33 | 6101.23 | 6160.9  | 7583.58   | 7259.12 | 7796.88 | Up   |
| Catspere2 | 1601.26 | 1.07891 | 0.09717 | 11.1038 | 1.20E-28 | 2.20E-26 | 1012.01 | 1068.46 | 1006.45 | 2111.79   | 2121.55 | 2287.29 | Up   |
| Desi2     | 1757.41 | 0.20078 | 0.10057 | 1.99635 | 0.0459   | 0.12757  | 1629.27 | 1742.11 | 1534.5  | 1932.44   | 1892.4  | 1813.74 | Up   |
| B230369F  | 67.6242 | -1.1257 | 0.34895 | -3.2261 | 0.00126  | 0.00676  | 84.1726 | 91.9928 | 102.172 | 48.7256   | 26.4006 | 52.2808 | Down |
| Gm38300   | 134.591 | -0.6792 | 0.23664 | -2.8701 | 0.0041   | 0.01836  | 149.963 | 154.28  | 192.886 | 117.149   | 88.7061 | 104.562 | Down |
| Efcab2    | 702.562 | -1.0949 | 0.21827 | -5.0164 | 5.27E-07 | 6.90E-06 | 774.001 | 1208.36 | 888.996 | 455.118   | 359.049 | 529.846 | Down |
| Kif26b    | 936.738 | -0.7063 | 0.18304 | -3.8584 | 0.00011  | 0.00085  | 903.646 | 1367.44 | 1213.66 | 739.178   | 629.391 | 767.121 | Down |
| Smyd3     | 1173.96 | -0.7497 | 0.17792 | -4.2137 | 2.51E-05 | 0.00022  | 1268.39 | 1752.66 | 1396.04 | 884.319   | 733.938 | 1008.42 | Down |
| Cnst      | 3136.09 | -0.2564 | 0.09308 | -2.7549 | 0.00587  | 0.02475  | 3338.85 | 3662.46 | 3240.87 | 2824.01   | 2904.07 | 2846.29 | Down |
| Kif28     | 6.11448 | -3.4357 | 1.39853 | -2.4566 | 0.01402  | 0.05035  | 6.77251 | 19.1652 | 7.63906 | 3.11015   | 0       | 0       | Down |
| Coq8a     | 1306.72 | -1.8454 | 0.51069 | -3.6137 | 0.0003   | 0.002    | 1577.99 | 3465.06 | 1090.48 | 557.753   | 562.862 | 586.149 | Down |
| Psen2     | 1876.62 | 0.37885 | 0.12298 | 3.08064 | 0.00207  | 0.01023  | 1670.88 | 1650.12 | 1573.65 | 2110.75   | 2379.23 | 1875.07 | Up   |
| Gm5069    | 241.267 | -0.5757 | 0.16304 | -3.5313 | 0.00041  | 0.00263  | 311.535 | 278.853 | 275.961 | 196.976   | 193.253 | 191.026 | Down |
| Stum      | 75.2367 | -0.9236 | 0.32273 | -2.8617 | 0.00421  | 0.01877  | 78.3676 | 130.323 | 86.8943 | 55.9827   | 48.5772 | 51.2754 | Down |
| Parp1     | 2993.74 | 0.53777 | 0.13424 | 4.00592 | 6.18E-05 | 0.0005   | 2784.47 | 2323.78 | 2218.19 | 3239.74   | 3912.57 | 3483.71 | Up   |
| Acdb3     | 219.577 | 0.55785 | 0.25233 | 2.21078 | 0.02705  | 0.08472  | 199.305 | 142.781 | 190.977 | 238.445   | 210.149 | 335.804 | Up   |
| Wdr26     | 8573.59 | 0.23529 | 0.08594 | 2.73776 | 0.00619  | 0.02583  | 7782.58 | 7869.22 | 7976.14 | 8667.98   | 9725.99 | 9419.6  | Up   |
| A430110L  | 61.2809 | -0.7807 | 0.29206 | -2.6731 | 0.00751  | 0.03023  | 79.3351 | 79.5355 | 73.526  | 41.4686   | 48.5772 | 45.243  | Down |
| Gm8146    | 3.25005 | 5.20259 | 1.83744 | 2.83144 | 0.00463  | 0.02035  | 0       | 0       | 0       | 3.11015   | 6.33615 | 10.054  | Up   |
| Lbr       | 3509.95 | -0.3586 | 0.08767 | -4.09   | 4.31E-05 | 0.00036  | 4110.91 | 3734.33 | 3986.64 | 3015.81   | 3054.03 | 3157.96 | Down |
| Enah      | 4326.1  | -0.8529 | 0.18409 | -4.6331 | 3.60E-06 | 3.94E-05 | 4470.82 | 6281.39 | 5954.65 | 3438.79   | 2427.8  | 3383.17 | Down |
| Degs1     | 8320    | 0.3187  | 0.12848 | 2.48059 | 0.01312  | 0.04767  | 8464.67 | 6822.8  | 6926.72 | 9541.93   | 9822.09 | 8341.81 | Up   |
| Capn8     | 82.2595 | 0.99073 | 0.34234 | 2.89402 | 0.0038   | 0.01723  | 67.7251 | 45.0382 | 52.5186 | 132.7     | 73.9218 | 121.654 | Up   |
| Susd4     | 1280.88 | 0.58163 | 0.13994 | 4.15616 | 3.24E-05 | 0.00028  | 958.794 | 1061.75 | 1058.01 | 1504.27   | 1337.98 | 1764.48 | Up   |
| Tlr5      | 486.808 | 0.57697 | 0.19581 | 2.94662 | 0.00321  | 0.01494  | 476.011 | 346.89  | 349.487 | 547.386   | 516.396 | 684.678 | Up   |
| Taf1a     | 984.096 | -0.4421 | 0.14244 | -3.1037 | 0.00191  | 0.0096   | 1006.2  | 1150.87 | 1244.21 | 846.997   | 742.386 | 913.909 | Down |
| Gm37986   | 29.3789 | -1.3956 | 0.43167 | -3.2331 | 0.00122  | 0.00661  | 43.5376 | 42.1634 | 42.0148 | 19.6976   | 14.7844 | 14.0756 | Down |
| 1700112H  | 2.08874 | 4.56221 | 2.1536  | 2.11841 | 0.03414  | NA       | 0       | 0       | 0       | 2.07343   | 8.4482  | 2.0108  | Up   |
| Gm37800   | 27.1511 | 3.71027 | 0.81718 | 4.54032 | 5.62E-06 | 5.86E-05 | 9.67501 | 0       | 1.90977 | 52.8725   | 61.2495 | 37.1998 | Up   |
| Mtarc1    | 60.0763 | -1.1671 | 0.42661 | -2.7358 | 0.00622  | 0.02596  | 63.8551 | 101.575 | 84.0297 | 49.7624   | 19.0085 | 42.2268 | Down |
| C130074C  | 3305.14 | -0.3759 | 0.17304 | -2.1724 | 0.02982  | 0.09146  | 3710.37 | 3058.76 | 4430.66 | 2686.13   | 3376.11 | 2568.8  | Down |
| Rab3gap2  | 2360.54 | 0.43117 | 0.11089 | 3.88833 | 0.0001   | 0.00077  | 1980.48 | 1877.23 | 2173.31 | 2772.18   | 2857.6  | 2502.44 | Up   |
| Tgfb2     | 1760.78 | 0.85259 | 0.11892 | 7.16947 | 7.53E-13 | 2.75E-11 | 1402.88 | 1162.37 | 1200.29 | 2166.74   | 2234.55 | 2397.88 | Up   |
| Spata17   | 1021.19 | -0.5484 | 0.21732 | -2.5236 | 0.01162  | 0.04324  | 1047.8  | 1295.57 | 1295.78 | 908.163   | 573.422 | 1006.41 | Down |
| Esrrg     | 391.697 | -1.0726 | 0.32735 | -3.2765 | 0.00105  | 0.00581  | 430.538 | 654.491 | 507.998 | 247.775   | 139.395 | 369.988 | Down |
| Kcnk2     | 3124.65 | -0.5016 | 0.16078 | -3.1201 | 0.00181  | 0.00915  | 4061.57 | 3247.54 | 3678.21 | 3113.26   | 2440.47 | 2206.85 | Down |
| Cenpf     | 125.999 | 1.03636 | 0.31367 | 3.30399 | 0.00095  | 0.00536  | 93.8476 | 84.3268 | 69.7065 | 154.471   | 120.387 | 233.253 | Up   |
| Gm29678   | 14.3801 | 3.35446 | 0.88484 | 3.79106 | 0.00015  | 0.00108  | 1.935   | 5.74955 | 0       | 32.1382</ |         |         |      |





|           |         |         |         |         |          |          |         |         |         |         |         |         |      |
|-----------|---------|---------|---------|---------|----------|----------|---------|---------|---------|---------|---------|---------|------|
| Upp2      | 917.01  | -0.3896 | 0.11927 | -3.2668 | 0.00109  | 0.00598  | 1014.91 | 1102.96 | 1002.63 | 793.088 | 732.882 | 855.596 | Down |
| Cd302     | 4132.04 | 0.95421 | 0.13255 | 7.19893 | 6.07E-13 | 2.26E-11 | 3170.5  | 2845.07 | 2424.45 | 5249.93 | 5172.41 | 5929.85 | Up   |
| Ly75      | 2566.26 | 1.89431 | 0.22267 | 8.50724 | 1.78E-17 | 1.26E-15 | 1418.36 | 1041.63 | 804.011 | 3487.51 | 4962.26 | 3683.79 | Up   |
| Pla2r1    | 1600.61 | -0.5497 | 0.13044 | -4.2144 | 2.50E-05 | 0.00022  | 1997.89 | 1631.91 | 2075.92 | 1241.99 | 1356.99 | 1298.98 | Down |
| Itgb6     | 4366.49 | 1.31245 | 0.16389 | 8.00799 | 1.17E-15 | 6.42E-14 | 2072.39 | 2849.86 | 2598.24 | 5338.05 | 7188.36 | 6152.05 | Up   |
| Tank      | 2875.79 | 0.38245 | 0.08462 | 4.51954 | 6.20E-06 | 6.42E-05 | 2428.43 | 2539.39 | 2522.8  | 3212.78 | 3170.19 | 3381.16 | Up   |
| Psmid14   | 3967.01 | 0.2919  | 0.0782  | 3.73287 | 0.00019  | 0.00133  | 3530.41 | 3633.72 | 3536.89 | 4383.23 | 4466.99 | 4250.83 | Up   |
| Ifih1     | 2657    | 0.58962 | 0.10655 | 5.53347 | 3.14E-08 | 5.17E-07 | 2311.36 | 2092.84 | 1960.37 | 3032.39 | 3248.33 | 3296.71 | Up   |
| Gca       | 1399.91 | 0.70643 | 0.10825 | 6.52587 | 6.76E-11 | 1.84E-09 | 1156.16 | 1008.09 | 1027.45 | 1676.37 | 1728.71 | 1802.68 | Up   |
| Fign      | 625.221 | -1.3024 | 0.20239 | -6.4352 | 1.23E-10 | 3.22E-09 | 835.921 | 1090.5  | 742.899 | 365.961 | 297.799 | 418.247 | Down |
| Grb14     | 5089.38 | 0.3874  | 0.12124 | 3.19544 | 0.0014   | 0.00738  | 4214.44 | 4905.33 | 4110.77 | 5267.55 | 5736.33 | 6301.85 | Up   |
| Scn3a     | 780.509 | -1.0957 | 0.24202 | -4.5274 | 5.97E-06 | 6.20E-05 | 737.236 | 1318.56 | 1134.4  | 402.246 | 602.99  | 487.619 | Down |
| Galnt3    | 2710.23 | 1.30181 | 0.10038 | 12.9691 | 1.83E-38 | 7.75E-36 | 1640.88 | 1562.92 | 1488.66 | 3813.04 | 4115.33 | 3640.56 | Up   |
| Xirp2     | 267.896 | -5.4607 | 1.00641 | -5.4259 | 5.77E-08 | 9.01E-07 | 308.633 | 1026.3  | 236.811 | 11.4039 | 2.11205 | 22.1188 | Down |
| B3galt1   | 133.529 | -0.636  | 0.2784  | -2.2845 | 0.02234  | 0.07275  | 130.613 | 198.36  | 158.511 | 78.7904 | 118.275 | 116.627 | Down |
| Stk39     | 1972.97 | 0.78709 | 0.24629 | 3.19583 | 0.00139  | 0.00738  | 1223.89 | 2077.5  | 1041.78 | 2312.91 | 2892.45 | 2289.3  | Up   |
| Gm13597   | 323.224 | 0.7524  | 0.16899 | 4.45241 | 8.49E-06 | 8.51E-05 | 265.095 | 229.024 | 228.217 | 386.695 | 458.315 | 371.998 | Up   |
| Cers6     | 1712.07 | 0.38266 | 0.11458 | 3.33967 | 0.00084  | 0.0048   | 1598.31 | 1320.48 | 1540.23 | 1896.15 | 1996.94 | 1920.32 | Up   |
| Nostrin   | 5065.38 | -0.4107 | 0.1604  | -2.5602 | 0.01046  | 0.03969  | 4795.9  | 5528.19 | 7020.3  | 3910.49 | 4578.93 | 4558.49 | Down |
| Lrp2      | 9674.22 | 2.53681 | 0.21236 | 11.9457 | 6.83E-33 | 1.80E-30 | 3904.84 | 2484.76 | 2142.76 | 14888.3 | 17631.4 | 16993.3 | Up   |
| Klh141    | 307.636 | -3.0479 | 0.71265 | -4.2768 | 1.90E-05 | 0.00017  | 266.063 | 1060.79 | 319.886 | 44.5788 | 55.9693 | 98.5293 | Down |
| Ccdc173   | 559.455 | -0.5093 | 0.24961 | -2.0402 | 0.04133  | 0.11753  | 602.753 | 731.151 | 637.862 | 471.706 | 300.967 | 612.289 | Down |
| Myo3b     | 100.444 | 0.83605 | 0.3507  | 2.38394 | 0.01713  | 0.05904  | 107.393 | 57.4955 | 51.5637 | 134.773 | 106.659 | 144.778 | Up   |
| Rpl9-ps7  | 198.028 | -0.7421 | 0.25345 | -2.9279 | 0.00341  | 0.01573  | 226.395 | 206.984 | 310.337 | 138.92  | 123.555 | 181.978 | Down |
| Sp5       | 345.176 | 2.29421 | 0.26812 | 8.55667 | 1.16E-17 | 8.47E-16 | 142.223 | 94.8676 | 113.631 | 647.947 | 684.304 | 388.085 | Up   |
| Gad1      | 64.8371 | -1.1089 | 0.37969 | -2.9206 | 0.00349  | 0.01605  | 60.9526 | 116.908 | 87.8492 | 39.3952 | 51.7452 | 32.1728 | Down |
| Gorasp2   | 7150.98 | 0.23068 | 0.08903 | 2.59099 | 0.00957  | 0.03684  | 6463.88 | 6424.17 | 7895.63 | 8053.13 | 7236.88 | Up      |      |
| Slc25a12  | 2726.9  | -0.3433 | 0.16323 | -2.1034 | 0.03543  | 0.10422  | 2769.96 | 3809.08 | 2570.54 | 2335.72 | 2452.09 | 2424.02 | Down |
| Metap1d   | 811.524 | -0.5186 | 0.11193 | -4.633  | 3.60E-06 | 3.94E-05 | 922.996 | 930.469 | 1014.09 | 653.131 | 654.736 | 693.727 | Down |
| Platr26   | 9.69172 | -2.5986 | 1.08651 | -2.3917 | 0.01677  | 0.05811  | 12.5775 | 28.7478 | 8.59395 | 6.2203  | 0       | 2.0108  | Down |
| Pdk1      | 2118.22 | -0.4375 | 0.12529 | -3.492  | 0.00048  | 0.00299  | 2452.62 | 2707.08 | 2151.35 | 1717.84 | 1755.11 | 1925.34 | Up   |
| Rapgef4   | 1667.92 | -0.6372 | 0.11552 | -5.5158 | 3.47E-08 | 5.64E-07 | 2032.72 | 2160.87 | 1897.35 | 1301.08 | 1415.07 | 1200.45 | Down |
| Map3k20   | 4001.97 | -0.5607 | 0.12756 | -4.3952 | 1.11E-05 | 0.00011  | 4327.63 | 5338.46 | 4643.6  | 2999.22 | 3584.15 | 3118.75 | Down |
| Ola1      | 2407.01 | 0.38146 | 0.10592 | 3.60136 | 0.00032  | 0.00208  | 2114.96 | 2256.7  | 1900.22 | 2706.87 | 2810.08 | 2653.25 | Up   |
| Scrn3     | 2058.45 | -0.375  | 0.08359 | -4.4865 | 7.24E-06 | 7.39E-05 | 2293.95 | 2337.19 | 2342.33 | 1823.91 | 1767.79 | 1776.54 | Down |
| Gpr155    | 3267.4  | -1.2706 | 0.1527  | -8.321  | 8.72E-17 | 5.60E-15 | 5116.15 | 4829.62 | 3914.06 | 2177.1  | 1663.24 | 1904.23 | Down |
| Atp5g3    | 8946.01 | -0.3376 | 0.17217 | -1.9606 | 0.04993  | 0.13668  | 8741.38 | 12662.4 | 8559.57 | 8490.7  | 8078.59 | 7143.37 | Down |
| Gm13660   | 2.58057 | 4.86898 | 1.94428 | 2.50426 | 0.01227  | 0.0452   | 0       | 0       | 0       | 8.29373 | 3.16808 | 4.0216  | Up   |
| Gm13655   | 33.3563 | 1.13875 | 0.51773 | 2.1995  | 0.02784  | 0.08677  | 30.96   | 10.5408 | 21.0074 | 59.0928 | 44.3531 | 34.1836 | Up   |
| Nfe2l2    | 17265.8 | 0.51023 | 0.1116  | 4.57189 | 4.83E-06 | 5.13E-05 | 15002.1 | 12596.3 | 15133.9 | 19673.8 | 19573.4 | 21615.1 | Up   |
| Gm13669   | 189.915 | 0.77309 | 0.18695 | 4.13533 | 3.54E-05 | 0.0003   | 144.158 | 144.697 | 131.774 | 265.399 | 231.27  | 222.194 | Up   |
| Agps      | 5494    | 0.26772 | 0.09461 | 2.8298  | 0.00466  | 0.02044  | 5142.27 | 4781.71 | 5033.19 | 5550.58 | 6173.52 | 6282.75 | Up   |
| Pde11a    | 25.1726 | -1.7798 | 0.54126 | -3.2882 | 0.00101  | 0.00562  | 24.1875 | 43.1216 | 49.6539 | 14.514  | 9.50423 | 10.054  | Down |
| Osbpl6    | 6513.08 | -0.4678 | 0.14324 | -3.2658 | 0.00109  | 0.006    | 8024.46 | 7490.71 | 7164.49 | 6339.52 | 4514.51 | 5544.79 | Down |
| Fkbp7     | 1314.47 | -0.583  | 0.13136 | -4.4382 | 9.07E-06 | 9.00E-05 | 1605.08 | 1568.67 | 1555.5  | 1151.79 | 1110.94 | 894.807 | Down |
| Ttn       | 4616.22 | -5.6602 | 1.10638 | -5.1159 | 3.12E-07 | 4.28E-06 | 5329    | 17840.9 | 3990.46 | 116.112 | 34.8488 | 386.074 | Down |
| Ccdc141   | 4490.79 | 0.51876 | 0.10359 | 5.00784 | 5.50E-07 | 7.20E-06 | 3821.63 | 3872.32 | 3382.2  | 5237.49 | 5011.9  | 5619.19 | Up   |
| Zfp385b   | 418.547 | 1.44193 | 0.21466 | 6.71727 | 1.85E-11 | 5.57E-10 | 282.51  | 206.026 | 187.157 | 509.027 | 701.201 | 625.359 | Up   |
| Gm14461   | 2.08752 | 4.56149 | 2.16346 | 2.10843 | 0.03499  | NA       | 0       | 0       | 0       | 5.18358 | 6.33615 | 1.0054  | Up   |
| Pde1a     | 258.004 | -0.7645 | 0.17594 | -4.3456 | 1.39E-05 | 0.00013  | 294.12  | 358.389 | 321.796 | 196.976 | 203.813 | 172.929 | Down |
| Gm4735    | 898.944 | -0.4378 | 0.19321 | -2.2662 | 0.02344  | 0.07572  | 1280.97 | 814.52  | 1007.4  | 699.783 | 869.109 | 721.878 | Down |
| Gm13680   | 263.425 | -0.4021 | 0.17145 | -2.3452 | 0.01902  | 0.06419  | 314.438 | 265.438 | 319.886 | 238.445 | 209.093 | 233.253 | Down |
| Itgav     | 3782.04 | 0.63591 | 0.09935 | 6.40073 | 1.55E-10 | 3.99E-09 | 3147.28 | 2729.12 | 3008.84 | 4443.36 | 4810.2  | 4553.46 | Up   |
| Fam171b   | 89.83   | -0.9727 | 0.3112  | -3.1257 | 0.00177  | 0.00901  | 118.035 | 121.699 | 117.451 | 46.6522 | 50.6892 | 84.4537 | Down |
| Gm13711   | 14.6315 | 2.46781 | 1.16943 | 2.11028 | 0.03483  | 0.10285  | 3.87001 | 5.74955 | 3.81953 | 63.2397 | 1.05603 | 10.054  | Up   |
| Tfpi      | 2624.58 | -0.5306 | 0.11964 | -4.4351 | 9.20E-06 | 9.11E-05 | 2966.36 | 3416.19 | 2922.9  | 2000.86 | 2355.99 | 2085.2  | Down |
| Med19     | 2046.85 | 0.21861 | 0.1032  | 2.11827 | 0.03415  | 0.10127  | 1897.27 | 1809.19 | 1969.92 | 2282.85 | 2027.57 | 2294.32 | Up   |
| Zdhhc5    | 4446.34 | 0.3459  | 0.09277 | 3.72837 | 0.00019  | 0.00135  | 4051.9  | 3845.49 | 3850.09 | 4726.39 | 5335.04 | 4869.16 | Up   |
| Smtnl1    | 59.64   | 1.55267 | 0.59249 | 2.62058 | 0.00878  | 0.0343   | 8.70751 | 35.4556 | 46.7893 | 132.7   | 51.7452 | 82.4429 | Up   |
| Slc43a1   | 263.22  | -1.5598 | 0.27484 | -5.675  | 1.39E-08 | 2.44E-07 | 491.491 | 340.182 | 347.577 | 182.462 | 114.051 | 103.556 | Down |
| Slc43a3   | 20710.5 | -0.5594 | 0.11301 | -4.9497 | 7.43E-07 | 9.49E-06 | 27392.9 | 23029.8 | 23604.7 | 16891.2 | 17893.3 | 15451   | Down |
| Tnks1bp1  | 8334.61 | 0.26833 | 0.10345 | 2.59384 | 0.00949  | 0.03656  | 7610.37 | 6820.89 | 8254.01 | 8904.35 | 9125.12 | 9292.92 | Up   |
| Olfir1033 | 3844.16 | -1.4672 | 0.24785 | -5.9196 | 3.23E-09 | 6.50E-08 | 3437.53 | 6964.62 | 6536.17 | 2265.22 | 2153.24 | 1708.18 | Down |
| Agbl2     | 1735.8  | -0.5497 | 0.24936 | -2.2043 | 0.0275   | 0.08587  | 1900.17 | 2227.95 | 2059.68 | 1519.83 | 852.212 | 1854.96 | Down |
| Mtch2     | 6608.77 | 0.2424  | 0.09364 | 2.58866 | 0.00963  | 0.03703  | 6116.54 | 6388.71 | 5659.59 | 7141.94 | 6853.6  | 7492.25 | Up   |
| Ndufs3    | 4086.01 | -0.2594 | 0.13014 | -1.9931 | 0.04625  | 0.1283   | 3947.41 | 5203.34 | 4206.26 | 3820.3  | 3698.2  | 3640.56 | Down |
| Sp1       | 2159.74 | 1.58702 | 0.26261 | 6.04324 | 1.51E-09 | 3.23E-08 | 1492.85 | 993.714 | 749.583 | 3111.18 | 4122.72 | 2488.37 | Up   |
| Mybpc3    | 1259.32 | -5.1804 | 0.88231 | -5.8714 | 4.32E-09 | 8.53E-08 | 1092.31 | 5340.38 | 920.507 | 50.7991 | 44.3531 | 107.578 | Down |
| Acp2      | 1347.85 | 0.84731 | 0.11999 | 7.06167 | 1.65E-12 | 5.72E-11 | 1031.36 | 986.048 | 871.808 | 1600.69 | 1801.58 | 1795.65 | Up   |
| 1110051M  | 2517.48 | -0.4573 | 0.10238 | -4.4663 | 7.96E-06 | 8.01E-05 | 2978.94 | 2971.56 | 2789.21 | 2171.92 | 1944.14 | 2249.08 | Down |
| Arhgap1   | 8674.63 | 0.26593 | 0.08458 | 3.14397 | 0.00167  | 0.00855  | 8183.13 | 7565.45 | 7883.51 | 9691.22 | 9708.04 | 9016.43 | Up   |
| Creb3l1   | 1327.15 | 0.4092  | 0.19671 | 2.08026 | 0.0375   | 0.10896  | 837.856 | 1238.07 | 1344.48 | 1600.69 | 1635.78 | 1306.02 | Up   |
| Cry2      | 4222.79 | -0.3835 | 0.13271 | -2.8898 | 0.00386  | 0.01743  | 5429.62 | 4313.12 | 4599.67 | 3980.99 | 3285.29 | 3728.03 | Down |
| Slc35c1   | 1896.32 | 0.74281 | 0.11405 | 6.51281 | 7.38E-11 | 1.99E-09 | 1551.87 | 1347.31 | 1356.89 | 2514.04 | 2203.92 | 2403.91 | Up   |
| Chst1     | 988.305 | -0.6024 | 0.1852  | -3.2528 | 0.00114  | 0.00625  | 1215.18 | 1122.12 | 1237.53 | 719.481 | 1001.11 | 634.408 | Down |
| Tspan18   | 4881.02 | -0.6149 | 0.14294 | -4.302  | 1.69E-05 | 0.00016  | 5525.4  | 5897.12 | 6294.59 | 3581.85 | 4597.93 | 3389.21 | Down |
| Hsd17b12  | 6208.65 | 0.59473 | 0.09509 | 6.25452 | 3.99E-10 | 9.43E-   |         |         |         |         |         |         |      |





|           |         |         |         |         |          |          |         |         |         |         |         |         |      |
|-----------|---------|---------|---------|---------|----------|----------|---------|---------|---------|---------|---------|---------|------|
| Sdcbp2    | 435.974 | 0.43093 | 0.21589 | 1.99609 | 0.04592  | 0.12762  | 297.99  | 456.131 | 359.991 | 485.183 | 421.354 | 595.197 | Up   |
| Tmem74b   | 10.6932 | -2.3805 | 0.84138 | -2.8292 | 0.00467  | 0.02046  | 20.3175 | 22.0399 | 11.4586 | 6.2203  | 2.11205 | 2.0108  | Down |
| Rspo4     | 67.2798 | -1.3384 | 0.4864  | -2.7516 | 0.00593  | 0.02494  | 119.97  | 55.579  | 113.631 | 40.4319 | 55.9693 | 18.0972 | Down |
| Angpt4    | 67.9397 | -2.3949 | 0.44733 | -5.3538 | 8.61E-08 | 1.29E-06 | 73.5301 | 179.194 | 89.759  | 24.8812 | 22.1765 | 18.0972 | Down |
| Slc52a3   | 2126.5  | 0.75966 | 0.15753 | 4.82236 | 1.42E-06 | 1.69E-05 | 1759.89 | 1449.85 | 1527.81 | 2875.85 | 2976.94 | 2168.65 | Up   |
| Tcf15     | 31.8242 | -1.5485 | 0.51792 | -2.9898 | 0.00279  | 0.01323  | 56.1151 | 60.3703 | 25.7818 | 18.6609 | 17.9524 | 12.0648 | Down |
| Tbc1d20   | 6734.59 | 0.42718 | 0.10054 | 4.24873 | 2.15E-05 | 0.00019  | 5947.23 | 5469.74 | 5817.15 | 8041.8  | 8102.88 | 7028.76 | Up   |
| Defb20    | 12.2049 | -1.7715 | 0.71184 | -2.4887 | 0.01282  | 0.04684  | 15.48   | 17.2487 | 23.8721 | 6.2203  | 7.39218 | 3.0162  | Down |
| H13       | 8218.87 | 0.324   | 0.09719 | 3.33384 | 0.00086  | 0.00488  | 7350.11 | 7197.48 | 7351.64 | 9524.31 | 9617.22 | 8272.44 | Up   |
| Id1       | 6813.21 | -0.5788 | 0.15153 | -3.8199 | 0.00013  | 0.00098  | 7652.94 | 8969.3  | 7863.46 | 6281.46 | 5679.3  | 4432.81 | Down |
| Cox4i2    | 2252.78 | -0.6796 | 0.16676 | -4.0755 | 4.59E-05 | 0.00038  | 2449.71 | 2676.42 | 3195.04 | 1614.17 | 2078.26 | 1503.07 | Down |
| Bcl2l1    | 8172.73 | -0.4048 | 0.09632 | -4.2021 | 2.64E-05 | 0.00023  | 8701.71 | 10056.9 | 9176.42 | 7321.29 | 6983.5  | 6796.51 | Down |
| Tpx2      | 232.265 | 1.28041 | 0.24027 | 5.32916 | 9.87E-08 | 1.46E-06 | 150.93  | 161.946 | 93.5785 | 342.116 | 305.191 | 339.825 | Up   |
| Foxs1     | 123.122 | -0.9629 | 0.30362 | -3.1713 | 0.00152  | 0.0079   | 113.198 | 177.278 | 197.661 | 87.0841 | 97.1543 | 66.3565 | Down |
| Ttll9     | 640.776 | -1.0148 | 0.24988 | -4.0611 | 4.88E-05 | 0.0004   | 650.161 | 995.631 | 926.236 | 462.375 | 291.463 | 518.787 | Down |
| Pdrg1     | 3236.23 | -0.2799 | 0.08595 | -3.2571 | 0.00113  | 0.00617  | 3417.22 | 3509.14 | 3721.18 | 2966.04 | 2949.48 | 2854.33 | Down |
| Ccm2l     | 4539.95 | -0.4276 | 0.11899 | -3.5938 | 0.00033  | 0.00213  | 4606.27 | 5150.64 | 5866.8  | 3722.85 | 3936.86 | 3956.25 | Down |
| Hck       | 3136.05 | 0.80794 | 0.15624 | 5.17125 | 2.33E-07 | 3.25E-06 | 2709.97 | 2084.21 | 2046.31 | 3754.98 | 4565.2  | 3655.64 | Up   |
| Tm9sf4    | 5100.22 | 0.49501 | 0.09389 | 5.27236 | 1.35E-07 | 1.95E-06 | 4366.33 | 4296.83 | 4038.2  | 5599.3  | 5968.66 | 6332.01 | Up   |
| Kif3b     | 2863.02 | 0.33109 | 0.12475 | 2.65399 | 0.00795  | 0.03167  | 2726.42 | 2520.22 | 2361.43 | 2972.26 | 2985.38 | 3612.41 | Up   |
| Asxl1     | 3838.86 | 0.20552 | 0.1031  | 1.99331 | 0.04623  | 0.12827  | 3721.01 | 3293.53 | 3682.98 | 3965.44 | 4408.91 | 3961.28 | Up   |
| Bpifa2    | 35.084  | 1.06507 | 0.44825 | 2.37608 | 0.0175   | 0.06001  | 12.5775 | 25.873  | 29.6014 | 45.6155 | 48.5772 | 48.2592 | Up   |
| Bpifa3    | 11.0919 | 5.07533 | 1.65523 | 3.06625 | 0.00217  | 0.01066  | 0       | 1.91652 | 0       | 6.2203  | 2.11205 | 56.3024 | Up   |
| Bpifb5    | 251.914 | -2.0984 | 0.50429 | -4.1612 | 3.17E-05 | 0.00027  | 334.756 | 507.877 | 382.908 | 58.0561 | 34.8488 | 193.037 | Down |
| Snta1     | 1061    | -0.9501 | 0.18856 | -5.0387 | 4.69E-07 | 6.21E-06 | 1212.28 | 1690.37 | 1291.96 | 835.593 | 746.61  | 589.165 | Down |
| E2f1      | 471.982 | 0.29124 | 0.14589 | 1.99625 | 0.04591  | 0.12759  | 433.441 | 432.175 | 407.735 | 518.358 | 578.702 | 461.479 | Up   |
| Pxmp4     | 2109.6  | 0.27421 | 0.11738 | 2.336   | 0.01949  | 0.06547  | 2104.32 | 1943.35 | 1681.55 | 2325.35 | 2334.87 | 2268.18 | Up   |
| Chmp4b    | 10412.9 | 0.42592 | 0.09512 | 4.47777 | 7.54E-06 | 7.67E-05 | 8960.03 | 8865.81 | 8834.58 | 12236.4 | 12708.2 | 10872.4 | Up   |
| Pigu      | 3831.52 | 0.79462 | 0.08183 | 9.71089 | 2.71E-22 | 2.91E-20 | 2828.01 | 2832.61 | 2746.24 | 4762.67 | 4757.39 | 5062.19 | Up   |
| Trp53inp2 | 14603.7 | 0.72107 | 0.16902 | 4.26623 | 1.99E-05 | 0.00018  | 9328.65 | 14000.2 | 9756.04 | 16846.6 | 19148.9 | 18541.6 | Up   |
| Ggt7      | 179.022 | -0.6947 | 0.24871 | -2.7933 | 0.00522  | 0.02247  | 163.508 | 272.145 | 228.217 | 145.14  | 140.451 | 124.67  | Down |
| Acss2     | 1861.84 | -0.7817 | 0.15373 | -5.0848 | 3.68E-07 | 4.99E-06 | 2369.41 | 2765.53 | 1927.91 | 1372.61 | 1297.86 | 1437.72 | Down |
| Myh7b     | 21.9243 | -1.8919 | 0.59598 | -3.1744 | 0.0015   | 0.00784  | 22.2525 | 51.746  | 29.6014 | 11.4039 | 9.50423 | 7.03781 | Down |
| Ergic3    | 7765.38 | 0.26519 | 0.09592 | 2.76465 | 0.0057   | 0.02417  | 7440.09 | 6843.88 | 6877.07 | 9135.54 | 8183.14 | 8112.58 | Up   |
| Spag4     | 36.7538 | -1.3166 | 0.49105 | -2.6811 | 0.00734  | 0.02965  | 43.5376 | 36.4138 | 77.3455 | 25.9179 | 23.2326 | 14.0756 | Down |
| Epb41l1   | 3209.58 | 0.65853 | 0.10892 | 6.04579 | 1.49E-09 | 3.19E-08 | 2732.22 | 2478.06 | 2258.3  | 3872.13 | 4095.27 | 3821.53 | Up   |
| MyI9      | 4288.71 | -1.609  | 0.27467 | -5.858  | 4.68E-09 | 9.16E-08 | 3528.48 | 8849.52 | 7001.2  | 2051.66 | 2312.7  | 1988.68 | Down |
| Bcl5if    | 1933.06 | 0.23202 | 0.10758 | 2.15676 | 0.03102  | 0.09408  | 1949.52 | 1685.58 | 1698.74 | 2124.23 | 2140.56 | 1999.74 | Up   |
| Rbl1      | 1284.41 | 0.62009 | 0.12545 | 4.94305 | 7.69E-07 | 9.77E-06 | 1149.39 | 961.133 | 927.191 | 1500.13 | 1606.21 | 1562.39 | Up   |
| Rpn2      | 18517.5 | 0.38795 | 0.07038 | 5.51245 | 3.54E-08 | 5.74E-07 | 16078.9 | 16344.1 | 15705   | 21347   | 20747.7 | 20882.2 | Up   |
| Src       | 3080.23 | 0.43843 | 0.12459 | 3.51911 | 0.00043  | 0.00274  | 2411.01 | 2443.56 | 2992.6  | 3379.69 | 3765.79 | 3488.74 | Up   |
| Bicap     | 3127.77 | 0.38828 | 0.09182 | 4.22871 | 2.35E-05 | 0.00021  | 2563.88 | 2713.79 | 2850.33 | 3574.6  | 3650.68 | 3413.34 | Up   |
| Platr27   | 9.2629  | 3.11096 | 0.91969 | 3.38262 | 0.00072  | 0.00422  | 1.935   | 1.91652 | 1.90977 | 19.6976 | 20.0645 | 10.054  | Up   |
| Tgm2      | 1547.08 | 0.41626 | 0.16986 | 2.45059 | 0.01426  | 0.05104  | 1560.58 | 1034.92 | 1380.76 | 1767.6  | 1900.85 | 1637.8  | Up   |
| Lbp       | 8863.58 | 1.1906  | 0.17577 | 6.77366 | 1.26E-11 | 3.89E-10 | 5398.66 | 6642.65 | 4160.42 | 12234.3 | 11274.1 | 13471.4 | Up   |
| Snhg11    | 6711.3  | 0.99871 | 0.09331 | 10.7031 | 9.85E-27 | 1.55E-24 | 4749.46 | 4445.36 | 4235.86 | 8454.42 | 9185.31 | 9197.41 | Up   |
| Ralgapb   | 5277.98 | 0.33309 | 0.09224 | 3.61104 | 0.0003   | 0.00201  | 4679.8  | 4465.49 | 4868.95 | 5539.17 | 5922.19 | 6192.26 | Up   |
| Actr5     | 813.895 | -0.2604 | 0.12205 | -2.1337 | 0.03286  | 0.09824  | 883.329 | 816.436 | 961.567 | 753.692 | 764.562 | 703.781 | Down |
| Mafb      | 929.597 | 1.18247 | 0.19575 | 6.04078 | 1.53E-09 | 3.27E-08 | 681.121 | 610.411 | 414.419 | 1397.49 | 1192.25 | 1281.89 | Up   |
| Chd6      | 3751.24 | -0.2189 | 0.07864 | -2.7835 | 0.00538  | 0.02301  | 4002.55 | 4129.14 | 3974.22 | 3511.36 | 3380.34 | 3509.85 | Down |
| Ptprt     | 229.311 | 0.95094 | 0.35264 | 2.69664 | 0.007    | 0.02855  | 110.295 | 211.775 | 147.052 | 356.63  | 171.076 | 379.036 | Up   |
| L3mbtl1   | 30.6577 | 1.42297 | 0.48432 | 2.93807 | 0.0033   | 0.01528  | 23.22   | 9.58259 | 17.1879 | 37.3218 | 44.3531 | 52.2808 | Up   |
| Tox2      | 679.309 | -0.7399 | 0.18383 | -4.0249 | 5.70E-05 | 0.00046  | 717.886 | 773.315 | 1058.01 | 516.284 | 543.853 | 466.506 | Down |
| Jph2      | 1276.94 | -1.8514 | 0.4984  | -3.7147 | 0.0002   | 0.00141  | 1253.88 | 3368.28 | 1376.94 | 617.883 | 630.447 | 414.225 | Down |
| Gdap1l1   | 20.1889 | 1.68053 | 0.71519 | 2.34978 | 0.01878  | 0.06363  | 5.80501 | 19.1652 | 3.81953 | 31.1015 | 40.129  | 21.1134 | Up   |
| Fitm2     | 2618.17 | -0.3971 | 0.1517  | -2.6179 | 0.00885  | 0.03451  | 2983.77 | 3525.43 | 2419.67 | 2272.48 | 2211.32 | 2296.34 | Down |
| Hnf4a     | 151.962 | 3.5438  | 0.45349 | 7.81444 | 5.52E-15 | 2.80E-13 | 27.09   | 14.3739 | 30.5563 | 341.08  | 125.667 | 373.004 | Up   |
| Pkig      | 3501.75 | -0.5368 | 0.12062 | -4.45   | 8.59E-06 | 8.58E-05 | 3790.67 | 4317.91 | 4328.48 | 3092.52 | 2946.31 | 2534.62 | Down |
| Ada       | 251.855 | -1.3323 | 0.27397 | -4.863  | 1.16E-06 | 1.40E-05 | 249.615 | 340.182 | 491.765 | 158.618 | 136.227 | 134.724 | Down |
| Ccn5      | 2195.72 | 0.49662 | 0.22909 | 2.16782 | 0.03017  | 0.09218  | 2375.22 | 1661.62 | 1427.55 | 2418.66 | 3247.28 | 2043.98 | Up   |
| Rims4     | 9.85604 | -2.6169 | 0.99235 | -2.6371 | 0.00836  | 0.03299  | 7.74001 | 33.5391 | 9.54883 | 2.07343 | 4.2241  | 2.0108  | Down |
| Slpi      | 3114.93 | 1.74195 | 0.50623 | 3.44101 | 0.00058  | 0.00351  | 2513.57 | 945.801 | 842.207 | 4779.26 | 4889.4  | 4719.35 | Up   |
| Matn4     | 4865.39 | 0.77851 | 0.1401  | 5.557   | 2.74E-08 | 4.56E-07 | 3550.73 | 3025.22 | 4174.75 | 6033.69 | 6549.47 | 5858.47 | Up   |
| Rbpjl     | 5215.59 | 1.41632 | 0.10521 | 13.462  | 2.62E-41 | 1.49E-38 | 2573.55 | 2937.06 | 3018.38 | 7976.49 | 7206.32 | 7581.73 | Up   |
| Sdc4      | 11919.8 | 0.6544  | 0.10783 | 6.06876 | 1.29E-09 | 2.81E-08 | 9357.67 | 8759.44 | 9668.19 | 14732.8 | 15877.3 | 13123.5 | Up   |
| Dbndd2    | 526.777 | -0.4169 | 0.17533 | -2.3778 | 0.01742  | 0.05977  | 553.411 | 542.374 | 711.388 | 400.172 | 444.587 | 508.733 | Down |
| Pigt      | 4123.32 | 0.41016 | 0.08181 | 5.01376 | 5.34E-07 | 6.99E-06 | 3482.04 | 3709.42 | 3431.85 | 4664.18 | 4733.11 | 4719.35 | Up   |
| Gm14317   | 119.185 | -0.9696 | 0.23169 | -4.1848 | 2.85E-05 | 0.00025  | 159.638 | 138.948 | 174.744 | 76.717  | 87.6501 | 77.4159 | Down |
| Wfdc2     | 62445.7 | 0.99802 | 0.15112 | 6.60425 | 4.00E-11 | 1.13E-09 | 37804.2 | 47070.6 | 40130.9 | 99402.4 | 75105.6 | 75160.8 | Up   |
| Spint3    | 19.9176 | 2.22204 | 0.93731 | 2.37065 | 0.01776  | 0.06078  | 3.87001 | 3.83303 | 13.3684 | 31.1015 | 62.3055 | 5.027   | Up   |
| Wfdc6a    | 74.156  | -1.2121 | 0.33702 | -3.5964 | 0.00032  | 0.00212  | 84.1726 | 85.285  | 141.323 | 45.6155 | 43.297  | 45.243  | Down |
| Eppin     | 62.3644 | -1.9015 | 0.5838  | -3.2571 | 0.00113  | 0.00617  | 59.0176 | 102.534 | 133.684 | 7.25701 | 27.4567 | 44.2376 | Down |
| Wfdc8     | 258.105 | -1.2214 | 0.19724 | -6.1926 | 5.92E-10 | 1.35E-08 | 428.603 | 312.392 | 342.803 | 165.875 | 154.18  | 144.778 | Down |
| Wfdc6b    | 75.6395 | -1.4945 | 0.33623 | -4.4449 | 8.79E-06 | 8.77E-05 | 101.588 | 93.9093 | 139.413 | 50.7991 | 36.9609 | 31.1674 | Down |
| Wfdc16    | 17.5383 | -1.4955 | 0.73749 | -2.0279 | 0.04257  | 0.12032  | 23.22   | 30.6643 | 23.8721 | 4.14686 | 4.2241  | 19.1026 | Down |
| Wfdc11    | 4.85688 | -2.5863 | 1.23028 | -2.1022 | 0.03554  | 0.10449  | 6.77251 | 11.4991 | 6.68418 | 2.07343 | 2.11205 | 0       | Down |
| Wfdc3     | 500.754 | 1.10454 | 0.28901 | 3.82186 | 0.00013  | 0.00097  | 347.333 | 310     |         |         |         |         |      |



|           |         |         |         |         |          |          |          |         |         |         |         |         |      |
|-----------|---------|---------|---------|---------|----------|----------|----------|---------|---------|---------|---------|---------|------|
| Nlgn1     | 238.411 | -3.743  | 1.1329  | -3.3039 | 0.00095  | 0.00536  | 25.155   | 702.404 | 603.486 | 42.5053 | 33.7928 | 23.1242 | Down |
| Ect2      | 331.933 | 0.91448 | 0.18905 | 4.83725 | 1.32E-06 | 1.58E-05 | 235.103  | 244.356 | 211.029 | 434.384 | 357.993 | 508.733 | Up   |
| Nceh1     | 7162.15 | 0.90271 | 0.13783 | 6.54954 | 5.77E-11 | 1.59E-09 | 4865.56  | 5205.26 | 4904.28 | 9268.24 | 10883.4 | 7846.15 | Up   |
| Fndc3b    | 5504.35 | 0.64266 | 0.10597 | 6.06443 | 1.32E-09 | 2.87E-08 | 4109.95  | 4544.06 | 4240.63 | 6167.42 | 7320.37 | 6643.69 | Up   |
| Tmem212   | 5313.08 | -0.4872 | 0.21118 | -2.307  | 0.02105  | 0.06942  | 5434.46  | 6884.13 | 6286.95 | 5217.94 | 2993.83 | 5057.17 | Down |
| Pld1      | 2323.69 | 0.88668 | 0.12305 | 7.20588 | 5.77E-13 | 2.17E-11 | 1689.26  | 1687.49 | 1517.31 | 2875.85 | 2769.95 | 3402.28 | Up   |
| Tnik      | 1202.79 | -0.6825 | 0.13551 | -5.0366 | 4.74E-07 | 6.28E-06 | 1373.85  | 1585.92 | 1486.75 | 831.446 | 888.117 | 1050.64 | Down |
| Eif5a2    | 1374.24 | 0.90469 | 0.14979 | 6.03957 | 1.55E-09 | 3.29E-08 | 1140.68  | 817.395 | 912.868 | 1761.38 | 1733.99 | 1879.09 | Up   |
| Mecom     | 4725.07 | 0.30803 | 0.09296 | 3.31371 | 0.00092  | 0.0052   | 4241.53  | 4461.65 | 3964.67 | 5149.37 | 5067.87 | 5465.36 | Up   |
| Lrrc34    | 980.086 | -0.6025 | 0.21756 | -2.7692 | 0.00562  | 0.0239   | 1101.98  | 1381.81 | 1061.83 | 837.666 | 549.133 | 948.093 | Down |
| Prkci     | 7628.25 | -0.2227 | 0.10509 | -2.1188 | 0.03411  | 0.10117  | 8958.1   | 7427.46 | 8261.65 | 6857.88 | 7336.21 | 6928.22 | Down |
| Kcnmb2    | 1404.89 | -0.7565 | 0.28933 | -2.6145 | 0.00894  | 0.03477  | 1700.87  | 2207.83 | 1386.49 | 1117.58 | 602.99  | 1413.59 | Down |
| Zmat3     | 1930.61 | 0.71831 | 0.13574 | 5.29191 | 1.21E-07 | 1.77E-06 | 1558.64  | 1561.96 | 1258.54 | 2163.63 | 2471.1  | 2569.8  | Up   |
| Zfp639    | 2181.4  | -0.2602 | 0.11132 | -2.3374 | 0.01942  | 0.06525  | 2297.82  | 2224.12 | 2610.65 | 1941.77 | 2107.83 | 1906.24 | Down |
| Mfn1      | 3917.2  | -0.3211 | 0.11938 | -2.6901 | 0.00714  | 0.029    | 3998.68  | 4981.03 | 4074.49 | 3493.73 | 3396.18 | 3559.12 | Down |
| Actl6a    | 2159.54 | 0.33598 | 0.09988 | 3.36393 | 0.00077  | 0.00447  | 1875.99  | 1789.07 | 2062.55 | 2357.49 | 2432.03 | 2440.11 | Up   |
| Usp13     | 500.053 | -0.6183 | 0.26214 | -2.3586 | 0.01834  | 0.0624   | 637.583  | 801.104 | 378.134 | 425.053 | 364.329 | 394.117 | Down |
| Ttc14     | 4944.32 | -0.2153 | 0.09331 | -2.3076 | 0.02102  | 0.06936  | 4970.06  | 5425.66 | 5542.14 | 4749.2  | 4355.05 | 4623.84 | Down |
| Dnajc19   | 626.97  | -0.3015 | 0.11863 | -2.5418 | 0.01103  | 0.04142  | 668.544  | 699.529 | 708.523 | 565.01  | 591.374 | 528.841 | Down |
| Gm38509   | 18.2218 | 1.8306  | 0.6457  | 2.83505 | 0.00458  | 0.02017  | 17.74001 | 8.62433 | 7.63906 | 40.4319 | 13.7283 | 31.1674 | Up   |
| 1700017N  | 3.86029 | -3.3502 | 1.58675 | -2.1114 | 0.03474  | 0.10265  | 3.87001  | 8.62433 | 8.59395 | 2.07343 | 0       | 0       | Down |
| Atp11b    | 3962.7  | 0.24118 | 0.08508 | 2.83475 | 0.00459  | 0.02018  | 3699.73  | 3577.18 | 3619.96 | 4073.26 | 4337.1  | 4469.01 | Up   |
| Gm15952   | 368.206 | -0.4808 | 0.19215 | -2.5025 | 0.01233  | 0.04537  | 393.773  | 446.549 | 446.885 | 267.473 | 273.511 | 381.047 | Down |
| Ccdc144b  | 3.67331 | -4.2448 | 2.09334 | -2.0278 | 0.04258  | 0.12033  | 0        | 7.66607 | 13.3684 | 0       | 0       | 1.0054  | Down |
| Acad9     | 960.766 | 0.33102 | 0.09765 | 3.38991 | 0.0007   | 0.00413  | 848.499  | 843.268 | 861.304 | 1052.27 | 1083.48 | 1075.78 | Up   |
| Ccna2     | 261.935 | 0.70134 | 0.27246 | 2.57409 | 0.01005  | 0.03836  | 226.395  | 215.608 | 156.601 | 337.969 | 222.821 | 412.214 | Up   |
| Bbs7      | 1057.1  | -0.5281 | 0.19353 | -2.7289 | 0.00635  | 0.02639  | 1053.61  | 1407.68 | 1284.32 | 806.565 | 709.649 | 1080.81 | Down |
| Trpc3     | 204.185 | -0.6727 | 0.25511 | -2.6367 | 0.00837  | 0.033    | 173.183  | 282.686 | 296.969 | 149.287 | 152.068 | 170.918 | Down |
| Gm12531   | 8.95925 | -1.5879 | 0.76948 | -2.0636 | 0.03906  | 0.11241  | 14.5125  | 12.4574 | 13.3684 | 3.11015 | 5.28013 | 5.027   | Down |
| Cetn4     | 1199.07 | -0.7115 | 0.26577 | -2.6773 | 0.00742  | 0.02991  | 1144.55  | 1721.03 | 1601.34 | 881.208 | 594.542 | 1251.72 | Down |
| Gm20755   | 246.024 | -1.4613 | 0.42067 | -3.4737 | 0.00051  | 0.00317  | 189.63   | 429.3   | 464.073 | 88.1208 | 91.8742 | 213.145 | Down |
| Ankrd50   | 3462.26 | -0.3719 | 0.15507 | -2.3981 | 0.01648  | 0.05726  | 3149.22  | 3944.19 | 4624.5  | 2934.94 | 3205.04 | 2915.66 | Down |
| C230034C  | 30.567  | -2.3465 | 0.69453 | -3.3785 | 0.00073  | 0.00427  | 21.285   | 41.2051 | 90.7139 | 9.33044 | 15.8404 | 5.027   | Down |
| Slc25a31  | 33.3109 | -1.1286 | 0.47086 | -2.3968 | 0.01654  | 0.05741  | 32.895   | 61.3286 | 42.9697 | 17.6242 | 16.8964 | 28.1512 | Down |
| Hspa4l    | 7330.48 | -0.3608 | 0.18138 | -1.989  | 0.0467   | 0.12933  | 7006.65  | 8336.85 | 9383.63 | 5987.03 | 5273.79 | 7994.95 | Down |
| Pgrmc2    | 4487.91 | -0.3235 | 0.0954  | -3.3913 | 0.0007   | 0.00411  | 4664.32  | 5280.01 | 5022.68 | 4188.33 | 3867.16 | 3904.98 | Down |
| 1700052H  | 11.3274 | -2.1759 | 0.99796 | -2.1804 | 0.02923  | 0.09012  | 11.61    | 39.2886 | 4.77441 | 4.14686 | 2.11205 | 6.03241 | Down |
| Jade1     | 2469.74 | -0.3599 | 0.0998  | -3.6061 | 0.00031  | 0.00205  | 2572.59  | 2923.65 | 2832.18 | 2240.34 | 2177.52 | 2072.13 | Down |
| Scrt1     | 881.182 | -0.5426 | 0.19466 | -2.7873 | 0.00531  | 0.0228   | 820.441  | 1066.54 | 1248.03 | 675.939 | 633.615 | 842.526 | Down |
| D3Ertd751 | 1014.22 | -0.4844 | 0.14813 | -3.2701 | 0.00108  | 0.00592  | 1030.39  | 1198.78 | 1319.65 | 784.794 | 802.579 | 949.098 | Down |
| Pcdh18    | 2118.99 | -0.3198 | 0.16013 | -1.9972 | 0.0458   | 0.12733  | 2091.74  | 2273.95 | 2692.77 | 1708.51 | 2238.77 | 1708.18 | Down |
| Slc7a11   | 435.471 | 1.22737 | 0.30899 | 3.97218 | 7.12E-05 | 0.00056  | 394.741  | 162.904 | 224.397 | 524.578 | 570.254 | 735.953 | Up   |
| Gm6209    | 45.0985 | 3.23658 | 0.50708 | 6.38273 | 1.74E-10 | 4.45E-09 | 10.6425  | 11.4991 | 3.81953 | 94.3411 | 93.9863 | 56.3024 | Up   |
| Gm9442    | 13.5678 | -1.2807 | 0.65316 | -1.9608 | 0.0499   | 0.13661  | 26.1225  | 12.4574 | 19.0977 | 8.29373 | 7.39218 | 8.04321 | Down |
| Ndufc1    | 787.97  | -0.4052 | 0.14237 | -2.8464 | 0.00442  | 0.01954  | 811.734  | 1033    | 848.891 | 696.673 | 699.089 | 638.43  | Down |
| 5031434C  | 276.278 | -0.5259 | 0.15665 | -3.3572 | 0.00079  | 0.00456  | 302.828  | 347.848 | 327.525 | 234.298 | 225.989 | 219.177 | Down |
| Foxo1     | 3287.85 | -0.2851 | 0.09474 | -3.0098 | 0.00261  | 0.01251  | 3685.21  | 3738.17 | 3411.8  | 2791.88 | 3067.75 | 3032.29 | Down |
| Gm42901   | 6.3268  | -2.0893 | 1.04756 | -1.9945 | 0.0461   | 0.12803  | 9.67501  | 16.2904 | 4.77441 | 1.03672 | 3.16808 | 3.0162  | Down |
| Lhfp      | 7461.88 | -0.3924 | 0.12222 | -3.2107 | 0.00132  | 0.00707  | 7926.74  | 8554.37 | 8930.06 | 6507.47 | 7206.32 | 5646.33 | Down |
| Nhlrc3    | 1911.98 | 0.68785 | 0.13925 | 4.93968 | 7.83E-07 | 9.91E-06 | 1603.15  | 1486.26 | 1304.37 | 2223.76 | 2689.7  | 2164.63 | Up   |
| Stoml3    | 103.486 | 3.57624 | 0.50231 | 7.11963 | 1.08E-12 | 3.87E-11 | 20.3175  | 13.4156 | 14.3232 | 203.196 | 77.0899 | 292.572 | Up   |
| 6430500D  | 5.30783 | 5.91015 | 1.59874 | 3.69677 | 0.00022  | 0.0015   | 0        | 0       | 0       | 12.4406 | 6.33615 | 13.0702 | Up   |
| Frem2     | 103.551 | -2.1135 | 0.33532 | -6.3029 | 2.92E-10 | 7.15E-09 | 122.873  | 229.982 | 151.826 | 44.5788 | 34.8488 | 37.1998 | Down |
| Gm30735   | 10.3209 | -2.7038 | 1.03265 | -2.6183 | 0.00884  | 0.0345   | 9.67501  | 26.8312 | 17.1879 | 6.2203  | 0       | 2.0108  | Down |
| Gm10727   | 20.7975 | -2.9483 | 0.80105 | -3.6805 | 0.00023  | 0.00158  | 42.5701  | 50.7877 | 17.1879 | 2.07343 | 2.11205 | 10.054  | Down |
| Exosc8    | 1390.26 | -0.3329 | 0.11745 | -2.8343 | 0.00459  | 0.02019  | 1637.98  | 1381.81 | 1629.99 | 1234.73 | 1276.73 | 1180.34 | Down |
| Alg5      | 2024.45 | 0.20439 | 0.08336 | 2.45181 | 0.01421  | 0.0509   | 1861.47  | 1913.64 | 1868.71 | 2203.02 | 2155.35 | 2144.52 | Up   |
| Smad9     | 634.651 | -0.644  | 0.15576 | -4.1343 | 3.56E-05 | 0.0003   | 770.131  | 775.231 | 776.32  | 475.853 | 586.094 | 424.279 | Down |
| Rfxap     | 1012.25 | -0.3066 | 0.1401  | -2.1887 | 0.02862  | 0.0887   | 1192.93  | 1002.34 | 1163.05 | 1018.05 | 818.42  | 878.72  | Down |
| Ccna1     | 282.838 | 3.50394 | 0.36242 | 9.66815 | 4.12E-22 | 4.29E-20 | 61.9201  | 48.8712 | 26.7367 | 576.414 | 310.471 | 672.613 | Up   |
| Spg20     | 2576.04 | -0.3685 | 0.11567 | -3.1855 | 0.00144  | 0.0076   | 3123.09  | 2589.21 | 2997.38 | 2392.74 | 2147.96 | 2205.85 | Down |
| Dclk1     | 274.343 | 0.85727 | 0.23624 | 3.62873 | 0.00028  | 0.0019   | 186.728  | 185.902 | 212.939 | 329.676 | 270.342 | 460.474 | Up   |
| Nbea      | 2242.36 | 0.22646 | 0.1136  | 1.99341 | 0.04622  | 0.12825  | 1875.02  | 2043.97 | 2281.22 | 2317.06 | 2420.41 | 2516.52 | Up   |
| Tm4sf1    | 17064.2 | -0.3053 | 0.08631 | -3.5376 | 0.0004   | 0.00257  | 18838.2  | 18076.6 | 19674.4 | 15258.4 | 16008.3 | 14529   | Down |
| Tm4sf4    | 9.75055 | 2.03194 | 0.91612 | 2.21798 | 0.02656  | 0.08357  | 1.935    | 4.79129 | 4.77441 | 16.5875 | 5.28013 | 25.135  | Up   |
| Gm26671   | 757.999 | -0.6512 | 0.14453 | -4.5058 | 6.61E-06 | 6.81E-05 | 869.784  | 895.014 | 1014.09 | 600.258 | 515.34  | 653.511 | Down |
| Ankub1    | 205.223 | 0.69388 | 0.30872 | 2.2476  | 0.0246   | 0.07866  | 135.45   | 223.274 | 111.721 | 289.244 | 191.141 | 280.507 | Up   |
| Rnf13     | 9941.53 | 0.41984 | 0.08429 | 4.98113 | 6.32E-07 | 8.19E-06 | 8980.35  | 8215.15 | 8319.89 | 10969.5 | 11552.9 | 11611.4 | Up   |
| Pfn2      | 1597.4  | -0.9051 | 0.16208 | -5.5845 | 2.34E-08 | 3.94E-07 | 2050.14  | 2326.65 | 1871.57 | 1035.68 | 965.207 | 1335.17 | Down |
| Serp1     | 17180.3 | 0.35841 | 0.09729 | 3.68404 | 0.00023  | 0.00157  | 16083.7  | 14418.9 | 14668.9 | 20676.3 | 18221.7 | 19012.1 | Up   |
| Gm8234    | 38.3626 | -1.3961 | 0.58413 | -2.39   | 0.01685  | 0.05833  | 37.7326  | 70.9111 | 58.2479 | 19.6976 | 7.39218 | 36.1944 | Down |
| 4930593A  | 56.0143 | -0.6687 | 0.32086 | -2.0841 | 0.03715  | 0.10823  | 60.9526  | 75.7024 | 69.7065 | 40.4319 | 38.0169 | 51.2754 | Down |
| Med12l    | 181.638 | 0.63919 | 0.20782 | 3.07572 | 0.0021   | 0.01038  | 119.97   | 164.82  | 141.323 | 202.16  | 232.326 | 229.231 | Up   |
| Gm5709    | 2.54082 | 4.84858 | 2.08652 | 2.32376 | 0.02014  | 0.06711  | 0        | 0       | 0       | 2.07343 | 2.11205 | 11.0594 | Up   |
| Sucnr1    | 11.705  | -4.4413 | 1.17565 | -3.7777 | 0.00016  | 0.00114  | 12.5775  | 41.2051 | 13.3684 | 2.07343 | 0       | 1.0054  | Down |
| P2ry1     | 320.786 | -1.1148 | 0.20606 | -5.41   | 6.30E-08 | 9.75E-07 | 450.856  | 515.543 | 350.442 | 198.013 | 181.636 | 228.226 | Down |
| Rap2b     | 525.498 | 0.5771  | 0.15549 | 3.71149 | 0.00021  | 0.00143  | 483.751  | 416.843 | 364.765 | 593.001 | 66      |         |      |





|           |         |         |         |         |          |          |         |         |         |         |         |         |      |
|-----------|---------|---------|---------|---------|----------|----------|---------|---------|---------|---------|---------|---------|------|
| 201001611 | 28.0123 | 1.80155 | 0.48687 | 3.70024 | 0.00022  | 0.00148  | 11.61   | 15.3321 | 10.5037 | 43.5421 | 54.9133 | 32.1728 | Up   |
| Dennd2d   | 2885.89 | 1.01793 | 0.11969 | 8.50469 | 1.82E-17 | 1.29E-15 | 1789.88 | 1956.76 | 1977.56 | 3729.07 | 3519.73 | 4342.33 | Up   |
| Cep1      | 7151.66 | 0.32443 | 0.08504 | 3.81504 | 0.00014  | 0.00099  | 6124.28 | 6283.3  | 6645.03 | 7650.96 | 8269.73 | 7936.63 | Up   |
| Dram2     | 9325.13 | 0.50274 | 0.09688 | 5.18935 | 2.11E-07 | 2.97E-06 | 7417.83 | 7884.55 | 7847.23 | 10433.5 | 11923.6 | 10444.1 | Up   |
| Cd53      | 4382.98 | 1.36308 | 0.16975 | 8.03012 | 9.74E-16 | 5.41E-14 | 2892.83 | 2384.15 | 2084.51 | 5921.72 | 7053.06 | 5511.61 | Up   |
| Gm27008   | 56.3803 | 1.69608 | 0.35011 | 4.84448 | 1.27E-06 | 1.52E-05 | 34.8301 | 22.9982 | 21.9623 | 92.2677 | 90.8182 | 75.4051 | Up   |
| Kcna2     | 550.363 | -1.6255 | 0.18405 | -8.8319 | 1.03E-18 | 8.07E-17 | 771.099 | 837.518 | 885.176 | 334.859 | 251.334 | 222.194 | Down |
| Rbm15     | 1163.86 | -0.2521 | 0.10703 | -2.3555 | 0.0185   | 0.06282  | 1229.69 | 1220.82 | 1345.43 | 1102.03 | 1006.39 | 1078.8  | Down |
| Slc6a17   | 51.5358 | -2.0018 | 0.49688 | -4.0286 | 5.61E-05 | 0.00045  | 48.3751 | 135.114 | 63.9772 | 18.6609 | 17.9524 | 25.135  | Down |
| Ahcyl1    | 8323.94 | 0.2582  | 0.0708  | 3.64707 | 0.00027  | 0.00178  | 7440.09 | 7607.62 | 7695.4  | 9094.07 | 9043.8  | 9062.68 | Up   |
| Csf1      | 2458.42 | 0.51256 | 0.10616 | 4.82812 | 1.38E-06 | 1.64E-05 | 2173.98 | 1945.27 | 1959.42 | 2754.55 | 3115.27 | 2802.05 | Up   |
| Gstm5     | 456.465 | -0.7543 | 0.16879 | -4.4691 | 7.85E-06 | 7.92E-05 | 518.581 | 665.99  | 534.734 | 347.3   | 368.553 | 303.631 | Down |
| Gstm7     | 371.327 | -0.9449 | 0.25713 | -3.6747 | 0.00024  | 0.00161  | 382.163 | 664.073 | 420.148 | 238.445 | 216.485 | 306.647 | Down |
| Gstm6     | 348.938 | -1.2595 | 0.24984 | -5.0411 | 4.63E-07 | 6.14E-06 | 386.033 | 652.574 | 438.291 | 216.674 | 165.796 | 234.258 | Down |
| Gm12494   | 18.4215 | -1.3682 | 0.57837 | -2.3656 | 0.018    | 0.06151  | 27.09   | 27.7895 | 24.827  | 13.4773 | 5.28013 | 12.0648 | Down |
| Gstm3     | 70.6854 | -1.1141 | 0.30702 | -3.6287 | 0.00028  | 0.0019   | 113.198 | 86.2433 | 90.7139 | 50.7991 | 35.9049 | 47.2538 | Down |
| Gstm2     | 10911.4 | -0.9951 | 0.12863 | -7.7362 | 1.02E-14 | 4.94E-13 | 15519.7 | 13600.6 | 14476   | 7565.95 | 6215.77 | 8090.46 | Down |
| Gstm1     | 27320.1 | -1.2035 | 0.12641 | -9.5209 | 1.72E-21 | 1.72E-19 | 44298   | 33645.4 | 36349.5 | 17236.4 | 16150.9 | 16240.2 | Down |
| Ampd2     | 1480.63 | 0.51203 | 0.12913 | 3.96522 | 7.33E-05 | 0.00058  | 1271.3  | 1164.28 | 1226.07 | 1632.83 | 1992.72 | 1596.58 | Up   |
| Gnai3     | 8687.55 | 0.3736  | 0.10448 | 3.57585 | 0.00035  | 0.00227  | 7727.43 | 6802.68 | 8176.66 | 9408.2  | 9979.44 | 10030.9 | Up   |
| Amigo1    | 1016.48 | -0.5078 | 0.12199 | -4.1624 | 3.15E-05 | 0.00027  | 1213.25 | 1094.33 | 1272.86 | 867.731 | 877.557 | 773.153 | Down |
| Atxn7i2   | 385.56  | -0.3232 | 0.1548  | -2.0876 | 0.03684  | 0.10753  | 423.766 | 428.342 | 433.517 | 297.537 | 383.337 | 346.863 | Down |
| Sypl2     | 42.4532 | -2.8499 | 0.55326 | -5.1511 | 2.59E-07 | 3.60E-06 | 58.0501 | 118.824 | 46.7893 | 14.514  | 9.50423 | 7.03781 | Down |
| Sort1     | 24354.8 | 0.8552  | 0.13582 | 6.29664 | 3.04E-10 | 7.40E-09 | 20431.7 | 16356.5 | 15233.2 | 29826.3 | 33630.2 | 30650.7 | Up   |
| Mybphl    | 1216.14 | -6.3068 | 1.67337 | -3.7689 | 0.00016  | 0.00117  | 1349.66 | 4576.64 | 1279.54 | 16.5875 | 0       | 74.3997 | Down |
| Psrc1     | 279.366 | 2.03967 | 0.27943 | 7.29933 | 2.89E-13 | 1.13E-11 | 151.898 | 104.45  | 71.6162 | 441.641 | 518.508 | 388.085 | Up   |
| Celsr2    | 1015.63 | -0.2157 | 0.11478 | -2.397  | 0.01653  | 0.05738  | 1022.65 | 1110.62 | 1203.15 | 928.897 | 936.694 | 891.791 | Down |
| 1700013F  | 705.776 | -0.8137 | 0.22983 | -3.5403 | 0.0004   | 0.00255  | 713.049 | 1093.37 | 892.816 | 539.092 | 377.001 | 619.327 | Down |
| Stxbp3    | 4419.18 | 0.20108 | 0.08801 | 2.28471 | 0.02233  | 0.07273  | 4142.84 | 3910.65 | 4281.69 | 4896.41 | 4543.02 | 4740.47 | Up   |
| Fndc7     | 494.004 | 1.73925 | 0.30959 | 5.61791 | 1.93E-08 | 3.30E-07 | 167.378 | 325.808 | 190.022 | 770.28  | 512.172 | 998.363 | Up   |
| Henmt1    | 24.085  | 1.66862 | 0.63757 | 2.61717 | 0.00887  | 0.03455  | 13.545  | 3.83303 | 17.1879 | 44.5788 | 42.241  | 23.1242 | Up   |
| Fam102b   | 2307.03 | 0.79499 | 0.17528 | 4.53566 | 5.74E-06 | 5.98E-05 | 1910.82 | 1597.42 | 1552.64 | 3023.06 | 3466.93 | 2291.31 | Up   |
| Gm19391   | 79.9904 | -0.7579 | 0.31094 | -2.4374 | 0.01479  | 0.05248  | 117.068 | 80.4937 | 104.082 | 45.6155 | 62.3055 | 70.3781 | Down |
| Vav3      | 898.207 | -0.264  | 0.11087 | -2.3815 | 0.01724  | 0.05931  | 956.859 | 932.386 | 1051.33 | 813.822 | 798.355 | 836.494 | Down |
| Amy1      | 731.841 | -1.672  | 0.19002 | -8.7991 | 1.38E-18 | 1.07E-16 | 887.199 | 1354.98 | 1100.03 | 308.941 | 375.945 | 363.955 | Down |
| Rnpc3     | 1099.03 | -0.2496 | 0.11783 | -2.1181 | 0.03416  | 0.1013   | 1241.3  | 1073.25 | 1267.13 | 1001.47 | 969.431 | 1041.6  | Down |
| S1pr1     | 15575   | -0.6282 | 0.10486 | -5.9911 | 2.08E-09 | 4.31E-08 | 17685   | 18404.3 | 20651.3 | 13135.2 | 11721.9 | 11852.7 | Down |
| A930005F  | 301.111 | -0.4773 | 0.17126 | -2.7867 | 0.00532  | 0.02283  | 365.716 | 307.601 | 378.134 | 227.041 | 258.726 | 269.447 | Down |
| Slc30a7   | 3913.28 | 0.71801 | 0.09009 | 7.96958 | 1.59E-15 | 8.61E-14 | 3109.55 | 2774.16 | 2993.56 | 4809.32 | 5001.34 | 4791.74 | Up   |
| Lrrc39    | 206.645 | -1.7484 | 0.45295 | -3.8601 | 0.00011  | 0.00085  | 179.955 | 597.953 | 177.608 | 88.1208 | 87.6501 | 108.583 | Down |
| Sass6     | 154.082 | 0.51177 | 0.22358 | 2.28898 | 0.02208  | 0.07213  | 120.938 | 137.031 | 123.18  | 210.453 | 148.9   | 183.988 | Up   |
| Agl       | 1216.16 | -0.4967 | 0.21542 | -2.3056 | 0.02113  | 0.06962  | 1234.51 | 1887.77 | 1058.01 | 1033.61 | 1098.27 | 894.807 | Down |
| Frrs1     | 475.105 | 1.28612 | 0.23549 | 5.46137 | 4.72E-08 | 7.53E-07 | 291.218 | 290.352 | 247.315 | 673.865 | 873.333 | 474.549 | Up   |
| Palmd     | 4812.15 | -0.5437 | 0.12679 | -4.2886 | 1.80E-05 | 0.00017  | 5750.83 | 5912.46 | 5461.93 | 3317.49 | 4296.97 | 4133.2  | Down |
| 4930455H  | 21.815  | -1.4618 | 0.61221 | -2.3877 | 0.01695  | 0.05862  | 39.6676 | 25.873  | 30.5563 | 13.4775 | 4.2241  | 17.0918 | Down |
| Snx7      | 3777.94 | 1.67131 | 0.1245  | 13.4241 | 4.37E-41 | 2.42E-38 | 1963.06 | 1735.41 | 1717.83 | 5775.54 | 6378.39 | 5097.38 | Up   |
| Gm37928   | 4.23014 | 5.58379 | 1.87707 | 2.97474 | 0.00293  | 0.0138   | 0       | 0       | 0       | 3.11015 | 3.16808 | 19.1026 | Up   |
| Dpyd      | 431.484 | -0.9248 | 0.2208  | -4.1886 | 2.81E-05 | 0.00025  | 578.566 | 596.037 | 521.366 | 293.391 | 216.485 | 383.058 | Down |
| Gm4332    | 332.039 | -0.5316 | 0.16603 | -3.202  | 0.00136  | 0.00725  | 435.376 | 353.597 | 388.637 | 244.665 | 291.463 | 278.496 | Down |
| Ptbp2     | 2031.34 | -0.366  | 0.11472 | -3.1902 | 0.00142  | 0.0075   | 2212.68 | 2371.69 | 2278.35 | 1600.69 | 1963.15 | 1761.46 | Down |
| Rwd3      | 591.136 | -0.3859 | 0.18833 | -2.049  | 0.04047  | 0.11556  | 556.313 | 717.736 | 735.26  | 549.459 | 413.962 | 574.084 | Down |
| Tlcd4     | 4631.27 | 1.55445 | 0.12288 | 12.6506 | 1.11E-36 | 4.04E-34 | 2542.59 | 2325.69 | 2189.55 | 6193.34 | 6824.04 | 7712.43 | Up   |
| Cnn3      | 9479.91 | -0.5604 | 0.11743 | -4.7719 | 1.83E-06 | 2.12E-05 | 10113.3 | 11035.3 | 12745.8 | 7289.15 | 8024.74 | 7671.21 | Down |
| Slc44a3   | 5098.85 | 0.38082 | 0.10496 | 3.62812 | 0.00029  | 0.0019   | 4710.76 | 4375.41 | 4203.39 | 5754.81 | 5320.26 | 6228.46 | Up   |
| A530020C  | 1948.91 | 0.454   | 0.14247 | 3.18665 | 0.00144  | 0.00757  | 1715.38 | 1699.95 | 1519.22 | 2136.67 | 1980.05 | 2642.19 | Up   |
| A730020M  | 38.47   | -1.1047 | 0.52992 | -2.0845 | 0.03711  | 0.10814  | 53.2126 | 75.7024 | 28.6465 | 13.4773 | 30.6247 | 29.1566 | Down |
| Abcd3     | 15846.3 | 1.14428 | 0.12781 | 8.95301 | 3.46E-19 | 2.82E-17 | 11304.3 | 9734.95 | 8576.76 | 21505.6 | 20738.2 | 23217.7 | Up   |
| Bcar3     | 3416.8  | -0.4389 | 0.12855 | -3.4144 | 0.00064  | 0.00382  | 3762.61 | 3476.56 | 4558.61 | 2980.56 | 2824.87 | 2897.57 | Down |
| Fnbp1l    | 8498.99 | -0.23   | 0.11072 | -2.0771 | 0.0378   | 0.10969  | 8532.4  | 8634.87 | 10357.6 | 7611.57 | 7850.49 | 8007.01 | Down |
| Pde5a     | 9117.22 | -0.5281 | 0.15273 | -3.4575 | 0.00055  | 0.00333  | 9037.43 | 10773.7 | 12490.8 | 6878.61 | 8502.06 | 7020.71 | Down |
| 4933405D  | 22.0605 | -1.7862 | 0.57846 | -3.0878 | 0.00202  | 0.01004  | 28.0575 | 41.2051 | 33.4209 | 7.25701 | 6.33615 | 16.0864 | Down |
| Myoz2     | 1595.33 | -5.9361 | 1.32021 | -4.4964 | 6.91E-06 | 7.09E-05 | 1958.22 | 5544.48 | 1915.5  | 27.9913 | 2.11205 | 123.664 | Down |
| Synpo2    | 1349.41 | -1.6107 | 0.2624  | -6.1385 | 8.33E-10 | 1.86E-08 | 1414.49 | 3019.47 | 1665.32 | 626.176 | 726.545 | 644.462 | Down |
| Snhg8     | 327.804 | -0.6218 | 0.22134 | -2.8094 | 0.00496  | 0.02159  | 359.911 | 359.347 | 472.667 | 262.289 | 311.527 | 201.08  | Down |
| Ank2      | 212.426 | -1.1684 | 0.44467 | -2.6275 | 0.0086   | 0.03373  | 203.175 | 514.585 | 164.24  | 124.406 | 182.692 | 85.4591 | Down |
| Tifa      | 1325.78 | 0.65957 | 0.19063 | 3.45997 | 0.00054  | 0.00331  | 977.176 | 1142.24 | 964.432 | 1621.42 | 1236.61 | 2012.81 | Up   |
| Ap1ar     | 1.88621 | 4.41731 | 2.12293 | 2.08076 | 0.03746  | NA       | 0       | 0       | 0       | 5.18358 | 2.11205 | 4.0216  | Up   |
| Fam241a   | 1563.82 | 0.56572 | 0.14271 | 3.96412 | 7.37E-05 | 0.00058  | 1250.98 | 1274.48 | 1257.58 | 2049.59 | 2018.06 | 1532.23 | Up   |
| Pitx2     | 39.8362 | -4.7974 | 0.79776 | -6.0136 | 1.81E-09 | 3.79E-08 | 85.1401 | 110.2   | 35.3307 | 0       | 6.33615 | 2.0108  | Down |
| Enpep     | 10278.8 | 0.80098 | 0.14268 | 5.61395 | 1.98E-08 | 3.37E-07 | 8635.92 | 6578.45 | 7275.25 | 12066.3 | 14815   | 12302.1 | Up   |
| Egf       | 115.252 | -1.5485 | 0.44611 | -3.4711 | 0.00052  | 0.0032   | 111.263 | 295.144 | 108.857 | 59.0928 | 73.9218 | 43.2322 | Down |
| 6330410L  | 10.8543 | -6.8369 | 1.70895 | -4.0006 | 6.32E-05 | 0.00051  | 1.935   | 47.9129 | 15.2781 | 0       | 0       | 0       | Down |
| Gar1      | 603.224 | -0.5097 | 0.17599 | -2.8963 | 0.00378  | 0.01712  | 687.894 | 579.746 | 858.44  | 476.889 | 501.612 | 514.765 | Down |
| Cfi       | 378.522 | 3.17365 | 0.18694 | 16.9768 | 1.22E-64 | 2.92E-61 | 76.4326 | 72.8277 | 77.3455 | 587.818 | 689.585 | 767.121 | Up   |
| Pla2g12a  | 1664.57 | -0.4638 | 0.11823 | -3.9232 | 8.74E-05 | 0.00067  | 1924.36 | 2100.5  | 1764.62 | 1476.28 | 1426.69 | 1294.96 | Down |
| Ostc      | 3999.72 | 0.23564 | 0.08911 | 2.64425 | 0.00819  | 0.03243  | 3592.33 | 3529.27 | 3899.74 | 4464.1  | 4282.18 | 4230.73 | Up   |
| Rpl34     | 5398.78 | -0.2926 | 0.13629 | -2.147  | 0.03179  | 0.09582  | 5999.48 | 5070.15 | 6763.4  |         |         |         |      |

|            |         |         |         |         |          |          |         |         |         |         |         |         |      |
|------------|---------|---------|---------|---------|----------|----------|---------|---------|---------|---------|---------|---------|------|
| Npnt       | 24025.1 | -0.2338 | 0.10564 | -2.2135 | 0.02686  | 0.08435  | 24452.6 | 25986.1 | 27464.3 | 21807.3 | 24151.3 | 20289   | Down |
| Arhgef38   | 3187.43 | 0.56073 | 0.10379 | 5.40265 | 6.57E-08 | 1.01E-06 | 2624.83 | 2581.55 | 2520.89 | 3958.18 | 3422.58 | 4016.58 | Up   |
| Gm43254    | 179.639 | -0.35   | 0.17622 | -1.986  | 0.04703  | 0.1301   | 201.24  | 201.234 | 201.48  | 152.397 | 162.628 | 158.853 | Down |
| Cxxc4      | 140.556 | -1.7174 | 0.30005 | -5.7238 | 1.04E-08 | 1.87E-07 | 169.313 | 279.812 | 197.661 | 72.5701 | 48.5772 | 75.4051 | Down |
| Cenpe      | 111.666 | 0.93232 | 0.28273 | 3.29757 | 0.00098  | 0.00547  | 71.5951 | 89.1181 | 69.7065 | 168.985 | 107.715 | 162.875 | Up   |
| Bdh2       | 59.2349 | -1.1292 | 0.30173 | -3.7426 | 0.00018  | 0.00129  | 82.2376 | 82.4102 | 79.2553 | 41.4686 | 34.8488 | 35.189  | Down |
| Slc9b1     | 62.596  | -1.1716 | 0.41024 | -2.856  | 0.00429  | 0.01906  | 78.3676 | 94.8676 | 86.8943 | 18.6609 | 47.5211 | 49.2646 | Down |
| Manba      | 2119.04 | 0.64793 | 0.15603 | 4.15257 | 3.29E-05 | 0.00028  | 1900.17 | 1662.58 | 1390.31 | 2555.5  | 2909.35 | 2296.34 | Up   |
| Slc39a8    | 18980.4 | 1.23118 | 0.14832 | 8.30057 | 1.04E-16 | 6.53E-15 | 13751.1 | 9734.95 | 10533.3 | 24791   | 27627.7 | 27444.4 | Up   |
| Ddit4l     | 423.02  | -0.4054 | 0.18899 | -2.1451 | 0.03195  | 0.09619  | 488.588 | 549.082 | 408.69  | 382.548 | 302.023 | 407.187 | Down |
| Gm31678    | 3.76325 | 2.77168 | 1.37823 | 2.01104 | 0.04432  | 0.12411  | 0.9675  | 1.91652 | 0       | 6.2203  | 8.4482  | 5.027   | Up   |
| H2az1      | 8002.92 | 0.68647 | 0.1207  | 5.68753 | 1.29E-08 | 2.28E-07 | 6255.86 | 6319.72 | 5826.7  | 10997.5 | 8572.81 | 10045   | Up   |
| Dnajb14    | 2567.26 | 0.28193 | 0.10271 | 2.74501 | 0.00605  | 0.02533  | 2422.62 | 2211.66 | 2317.5  | 2610.45 | 2830.15 | 3011.18 | Up   |
| Lamtor3    | 3542.48 | 0.24557 | 0.11875 | 2.06794 | 0.03865  | 0.1115   | 3438.5  | 3102.84 | 3183.58 | 3724.92 | 4322.31 | 3482.71 | Up   |
| Dapp1      | 1172.25 | 0.97546 | 0.23404 | 4.16791 | 3.07E-05 | 0.00027  | 1072.96 | 685.155 | 613.035 | 1602.76 | 1806.86 | 1252.73 | Up   |
| 1110002E   | 87.0708 | -2.4113 | 0.52611 | -4.5833 | 4.58E-06 | 4.88E-05 | 113.198 | 264.479 | 62.0674 | 34.2116 | 25.3446 | 23.1242 | Down |
| Mttp       | 306.694 | -0.9052 | 0.24048 | -3.7641 | 0.00017  | 0.00119  | 357.008 | 439.841 | 402.961 | 230.151 | 146.788 | 263.415 | Down |
| Trmt10a    | 439.562 | -0.4608 | 0.19618 | -2.3487 | 0.01884  | 0.06375  | 420.863 | 563.456 | 543.328 | 373.218 | 305.191 | 431.317 | Down |
| Adh6b      | 58.1239 | -1.4604 | 0.60048 | -2.4321 | 0.01501  | 0.05308  | 43.5376 | 102.534 | 109.812 | 13.4773 | 20.0645 | 59.3187 | Down |
| Rap1gds1   | 3650.3  | 0.30043 | 0.1494  | 2.01091 | 0.04434  | 0.12413  | 3583.63 | 3084.63 | 3146.34 | 3789.2  | 4811.25 | 3486.73 | Up   |
| Unc5c      | 701.634 | -0.4908 | 0.12588 | -3.8992 | 9.65E-05 | 0.00074  | 860.109 | 774.273 | 825.019 | 624.103 | 592.43  | 533.868 | Down |
| Bmpr1b     | 1050.34 | -0.7998 | 0.287   | -2.7866 | 0.00533  | 0.02283  | 799.156 | 1617.54 | 1586.06 | 926.824 | 547.021 | 825.434 | Down |
| Pdlim5     | 7448.07 | -0.6663 | 0.18784 | -3.5471 | 0.00039  | 0.00249  | 6638.03 | 11289.2 | 9486.76 | 5585.82 | 5490.28 | 6198.3  | Down |
| Gbp5       | 974.024 | 0.85917 | 0.23517 | 3.65341 | 0.00026  | 0.00174  | 865.914 | 567.289 | 643.591 | 947.558 | 1628.39 | 1191.4  | Up   |
| Gbp3       | 1807.95 | 0.60117 | 0.16126 | 3.72798 | 0.00019  | 0.00136  | 1513.17 | 1550.46 | 1246.12 | 1918.96 | 2604.16 | 2014.82 | Up   |
| Gbp2       | 4041.81 | 0.35496 | 0.17906 | 1.98231 | 0.04744  | 0.13102  | 3838.08 | 3371.15 | 3431.85 | 3826.52 | 5845.1  | 3938.16 | Up   |
| Kyat3      | 547.675 | -0.4792 | 0.24208 | -1.9794 | 0.04777  | 0.13179  | 518.581 | 780.981 | 613.99  | 488.293 | 324.2   | 560.008 | Down |
| Gtf2b      | 3080.27 | 0.29038 | 0.12093 | 2.40131 | 0.01634  | 0.05681  | 2817.36 | 2797.16 | 2699.45 | 3877.32 | 3073.03 | 3217.28 | Up   |
| 4930519L   | 2.55447 | 4.85583 | 1.97773 | 2.45525 | 0.01408  | 0.05051  | 0       | 0       | 0       | 3.11015 | 3.16808 | 9.04861 | Up   |
| Gm42705    | 9.95634 | 2.5628  | 1.04918 | 2.44267 | 0.01458  | 0.05187  | 1.935   | 5.74955 | 0.95488 | 23.8445 | 23.2326 | 4.0216  | Up   |
| Lmo4       | 4493.01 | 0.35562 | 0.1156  | 3.07631 | 0.0021   | 0.01036  | 3906.77 | 3863.7  | 4055.39 | 5053.99 | 5622.28 | 4455.94 | Up   |
| Hs2st1     | 12474.6 | 0.44574 | 0.11804 | 3.77624 | 0.00016  | 0.00114  | 11898.3 | 9424.47 | 10365.3 | 13561.3 | 14515.1 | 15083   | Up   |
| Clca3b     | 207.474 | 5.79383 | 2.61281 | 2.21748 | 0.02659  | 0.08365  | 0       | 22.0399 | 0       | 427.127 | 8.4482  | 787.229 | Up   |
| Clca2      | 18.939  | 1.25578 | 0.63638 | 1.9733  | 0.04846  | 0.13324  | 5.80501 | 14.3739 | 13.3684 | 16.5875 | 24.2886 | 39.2106 | Up   |
| Bcl10      | 2992.82 | 0.41911 | 0.09445 | 4.4372  | 9.11E-06 | 9.04E-05 | 2735.13 | 2487.64 | 2460.73 | 3566.3  | 3337.04 | 3370.1  | Up   |
| Syde2      | 1422.74 | -0.483  | 0.12426 | -3.887  | 0.0001   | 0.00077  | 1759.89 | 1691.33 | 1524.95 | 1317.67 | 1102.49 | 1140.12 | Down |
| Mcoln3     | 1091.66 | 2.97088 | 0.66753 | 4.45057 | 8.56E-06 | 8.58E-05 | 468.271 | 155.238 | 117.451 | 1550.93 | 2773.12 | 1484.98 | Up   |
| Mcoln2     | 254.592 | 1.23414 | 0.23728 | 5.20114 | 1.98E-07 | 2.81E-06 | 202.208 | 137.989 | 115.541 | 365.961 | 336.872 | 368.982 | Up   |
| Ssx2ip     | 2552.34 | 0.3805  | 0.11588 | 3.28365 | 0.00102  | 0.00569  | 2393.6  | 2180.04 | 2079.73 | 2865.48 | 2644.29 | 3150.93 | Up   |
| Gng5       | 6392.26 | 0.43112 | 0.10082 | 4.27608 | 1.90E-05 | 0.00017  | 5586.35 | 5117.1  | 5629.03 | 7881.11 | 7340.43 | 6799.53 | Up   |
| Ttll7      | 5328.39 | 0.54531 | 0.11426 | 4.77266 | 1.82E-06 | 2.12E-05 | 4019    | 4297.79 | 4682.75 | 5686.39 | 6670.91 | 6613.53 | Up   |
| Gm42647    | 40.8059 | 3.01871 | 0.5967  | 5.05897 | 4.22E-07 | 5.64E-06 | 10.6425 | 11.4991 | 4.77441 | 69.46   | 34.8488 | 113.61  | Up   |
| Gm31121    | 15.4072 | 1.75412 | 0.80041 | 2.19153 | 0.02841  | 0.0882   | 9.67501 | 1.91652 | 9.54883 | 40.4319 | 14.7844 | 16.0864 | Up   |
| Rpsa-ps1c  | 1735.64 | -0.3953 | 0.11788 | -3.353  | 0.0008   | 0.00461  | 1842.12 | 1879.15 | 2194.32 | 1544.71 | 1544.97 | 1408.57 | Down |
| Ifi44      | 814.001 | 1.11592 | 0.3544  | 3.14876 | 0.00164  | 0.00844  | 540.833 | 693.779 | 307.472 | 1162.16 | 609.327 | 1570.44 | Up   |
| Ptgrf      | 879.449 | -1.5382 | 0.25924 | -5.9333 | 2.97E-09 | 6.01E-08 | 1229.69 | 1817.82 | 877.537 | 453.045 | 519.564 | 379.036 | Down |
| Gm43618    | 47.4971 | -2.209  | 0.46402 | -4.7605 | 1.93E-06 | 2.24E-05 | 66.7576 | 114.991 | 52.5186 | 14.514  | 21.1205 | 15.081  | Down |
| Dnajb4     | 5778.04 | -0.4291 | 0.10623 | -4.0391 | 5.37E-05 | 0.00044  | 6139.76 | 7116.99 | 6636.44 | 5140.04 | 4535.63 | 5099.39 | Down |
| Nxn        | 2692.88 | -0.582  | 0.26068 | -2.2327 | 0.02557  | 0.08106  | 2285.24 | 4860.29 | 2540.94 | 1957.32 | 228.21  | 2285.28 | Down |
| Miga1      | 2822.68 | 0.40966 | 0.13989 | 2.92845 | 0.00341  | 0.0157   | 2333.61 | 2390.86 | 2549.54 | 2968.12 | 2873.45 | 3820.52 | Up   |
| Usp33      | 2135.06 | 0.91631 | 0.16582 | 5.52589 | 3.28E-08 | 5.39E-07 | 1619.6  | 1208.36 | 1608.98 | 2491.23 | 2633.73 | 3248.45 | Up   |
| Pigk       | 2748.38 | 0.28513 | 0.10104 | 2.82194 | 0.00477  | 0.02087  | 2524.21 | 2635.21 | 2273.58 | 2921.47 | 3121.61 | 3014.19 | Up   |
| St6galnac' | 1334.13 | -0.746  | 0.17435 | -4.2787 | 1.88E-05 | 0.00017  | 1300.32 | 1835.07 | 1879.21 | 1081.29 | 1020.12 | 888.774 | Down |
| Acadm      | 5942.55 | -0.9167 | 0.20314 | -4.5126 | 6.40E-06 | 6.60E-05 | 6269.41 | 10587.8 | 6451.19 | 4299.26 | 3888.29 | 4159.34 | Down |
| Slc44a5    | 46.9285 | -2.2261 | 0.58278 | -3.8198 | 0.00013  | 0.00098  | 31.9275 | 135.114 | 64.932  | 12.4406 | 20.0645 | 17.0918 | Down |
| Tryw3      | 277.922 | -0.4333 | 0.20736 | -2.0895 | 0.03667  | 0.10714  | 387.968 | 272.145 | 297.923 | 206.306 | 261.894 | 241.296 | Down |
| Cyz        | 784.335 | -0.467  | 0.18679 | -2.5003 | 0.01241  | 0.04563  | 908.484 | 945.801 | 876.582 | 612.699 | 526.957 | 835.488 | Down |
| Tnni3k     | 193.75  | -2.9175 | 0.55133 | -5.2917 | 1.21E-07 | 1.77E-06 | 216.72  | 624.785 | 185.247 | 26.9546 | 25.3446 | 83.4483 | Down |
| Zranb2     | 5604.01 | -0.2036 | 0.09303 | -2.1883 | 0.02865  | 0.08875  | 5847.58 | 5847.29 | 6301.27 | 4910.92 | 5525.12 | 5191.89 | Down |
| Ptger3     | 521.286 | 1.9011  | 0.61435 | 3.09448 | 0.00197  | 0.00985  | 169.313 | 396.719 | 94.5334 | 662.461 | 733.938 | 1070.75 | Up   |
| Cth        | 888.258 | 1.19255 | 0.19076 | 6.25169 | 4.06E-10 | 9.59E-09 | 568.891 | 577.83  | 475.532 | 1318.7  | 938.807 | 1449.79 | Up   |
| Ankrd13c   | 4357.61 | 0.26887 | 0.0827  | 3.25096 | 0.00115  | 0.00628  | 3934.83 | 3971.02 | 3952.26 | 4534.6  | 4961.21 | 4791.74 | Up   |
| Depdc1a    | 42.7761 | 1.15014 | 0.53253 | 2.15976 | 0.03079  | 0.09356  | 27.09   | 39.2886 | 13.3684 | 79.8271 | 32.7368 | 64.3457 | Up   |
| Wls        | 13966.9 | 0.57332 | 0.09524 | 6.01982 | 1.75E-09 | 3.66E-08 | 12315.3 | 10675   | 10692.8 | 16769.9 | 16635.6 | 16712.8 | Up   |
| Al838599   | 1206.37 | -0.6779 | 0.22722 | -2.9835 | 0.00285  | 0.01347  | 1596.38 | 1478.59 | 1378.85 | 884.319 | 1255.61 | 644.462 | Down |
| Gm11783    | 11.9073 | -1.6023 | 0.8036  | -1.9939 | 0.04616  | 0.12814  | 11.61   | 18.2069 | 23.8721 | 5.18358 | 10.5603 | 2.0108  | Down |
| Lyn        | 7745.52 | 0.64462 | 0.1082  | 5.95761 | 2.56E-09 | 5.22E-08 | 6502.58 | 6211.43 | 5416.1  | 8899.17 | 9760.84 | 9683.02 | Up   |
| Chchd7     | 1185.83 | -0.9873 | 0.1278  | -7.725  | 1.12E-14 | 5.33E-13 | 1426.1  | 1629.04 | 1673.91 | 788.941 | 868.053 | 728.916 | Down |
| Penk       | 165.981 | -2.2264 | 0.34535 | -6.4467 | 1.14E-10 | 3.01E-09 | 208.98  | 345.931 | 265.457 | 71.5334 | 71.8097 | 32.1728 | Down |
| Ubxn2b     | 1343.6  | -0.2458 | 0.10005 | -2.4569 | 0.01402  | 0.05033  | 1446.41 | 1483.38 | 1443.78 | 1194.3  | 1181.69 | 1312.05 | Down |
| 4930430E   | 360.983 | 4.65425 | 0.41347 | 11.2566 | 2.15E-29 | 4.14E-27 | 40.6351 | 34.4973 | 7.63906 | 709.114 | 852.212 | 521.803 | Up   |
| Sdcbp      | 30804.5 | 0.90057 | 0.09828 | 9.1634  | 5.03E-20 | 4.36E-18 | 22403.5 | 21257.1 | 20810.7 | 39014.7 | 43857.8 | 37483.4 | Up   |
| Tox        | 109.551 | 0.57295 | 0.25985 | 2.20489 | 0.02746  | 0.08577  | 105.458 | 90.0763 | 68.7516 | 120.259 | 132.003 | 140.756 | Up   |
| Car8       | 14573.7 | 1.71717 | 0.11403 | 15.0586 | 3.03E-51 | 2.97E-48 | 7464.27 | 6880.3  | 6048.23 | 20876.3 | 23467   | 22706   | Up   |
| Clvs1      | 44.193  | -2.597  | 0.75194 | -3.4537 | 0.00055  | 0.00338  | 55.1476 | 123.615 | 48.699  | 14.514  | 22.1765 | 1.0054  | Down |
| Asph       | 4283.03 | -0.3972 | 0.15569 | -2.5512 | 0.01074  | 0.04057  | 4039.32 | 5923.95 | 4643.6  | 3747.73 | 3484.88 | 3858.73 | Down |
| 4930412C   | 414.443 | -0.4192 | 0.18146 | -2.3099 | 0.02089  | 0.06898  | 431.506 | 57      |         |         |         |         |      |

|          |         |         |         |         |          |          |         |         |         |         |         |         |      |
|----------|---------|---------|---------|---------|----------|----------|---------|---------|---------|---------|---------|---------|------|
| Pdp1     | 1698.47 | -0.2379 | 0.11005 | -2.1617 | 0.03064  | 0.09319  | 1766.66 | 1933.77 | 1814.28 | 1438.96 | 1547.08 | 1690.08 | Down |
| Tmem67   | 1025.3  | -0.3797 | 0.17786 | -2.1346 | 0.0328   | 0.09807  | 1220.02 | 1159.49 | 1099.07 | 885.355 | 696.977 | 1090.86 | Down |
| Rbm12b2  | 934.948 | -0.2941 | 0.14254 | -2.063  | 0.03911  | 0.11252  | 961.696 | 994.672 | 1133.45 | 918.53  | 728.658 | 872.688 | Down |
| Gm11839  | 28.2575 | -1.084  | 0.54822 | -1.9773 | 0.04801  | 0.13224  | 44.5051 | 31.6225 | 39.1502 | 20.7343 | 7.39218 | 26.1404 | Down |
| Rbm12b1  | 514.583 | -0.392  | 0.14839 | -2.6419 | 0.00824  | 0.03262  | 602.753 | 519.376 | 630.223 | 418.833 | 427.69  | 488.625 | Down |
| Pip4p2   | 2527.34 | 0.31401 | 0.09379 | 3.34802 | 0.00081  | 0.00468  | 2251.38 | 2326.65 | 2181.91 | 2785.66 | 2962.15 | 2656.27 | Up   |
| Gm11837  | 65.3992 | -1.8879 | 0.33316 | -5.6665 | 1.46E-08 | 2.55E-07 | 83.2051 | 119.782 | 105.992 | 26.9546 | 24.2886 | 32.1728 | Down |
| Tmem64   | 3005.69 | 0.21955 | 0.08421 | 2.60725 | 0.00913  | 0.0354   | 2814.46 | 2826.86 | 2690.86 | 3160.95 | 3352.88 | 3188.13 | Up   |
| Decr1    | 3314.85 | -0.404  | 0.14071 | -2.8709 | 0.00409  | 0.01833  | 3792.61 | 4390.74 | 3144.43 | 2925.61 | 2840.71 | 2795.01 | Down |
| Gm11867  | 31.1914 | 2.2901  | 0.86087 | 2.66022 | 0.00781  | 0.03116  | 16.4475 | 12.4574 | 2.86465 | 83.974  | 63.3615 | 8.04321 | Up   |
| Cngb3    | 13.271  | -2.18   | 0.7594  | -2.8707 | 0.0041   | 0.01834  | 16.4475 | 32.5808 | 16.233  | 6.2203  | 2.11205 | 6.03241 | Down |
| Cpne3    | 6876.94 | 0.50389 | 0.0849  | 5.93508 | 2.94E-09 | 5.95E-08 | 5941.43 | 5507.11 | 5615.67 | 7699.69 | 8307.75 | 8190    | Up   |
| Wwp1     | 695.326 | -0.4746 | 0.14436 | -3.2874 | 0.00101  | 0.00564  | 792.384 | 837.518 | 796.372 | 561.9   | 512.172 | 671.608 | Down |
| Atp6v0d2 | 6303.27 | 2.89168 | 0.58492 | 4.9437  | 7.67E-07 | 9.75E-06 | 2612.25 | 1209.32 | 669.373 | 10211.7 | 13775.9 | 9341.18 | Up   |
| Ttpa     | 661.163 | -0.4313 | 0.18634 | -2.3148 | 0.02062  | 0.06833  | 641.453 | 772.356 | 864.169 | 529.762 | 482.604 | 676.635 | Down |
| Nkain3   | 39.6807 | 2.46974 | 0.76705 | 3.2198  | 0.00128  | 0.00689  | 1.935   | 26.8312 | 7.63906 | 55.9827 | 40.129  | 105.567 | Up   |
| Pnir     | 8972.44 | -0.273  | 0.1034  | -2.6398 | 0.00829  | 0.03277  | 9207.71 | 9573    | 10675.6 | 7677.92 | 8046.91 | 8653.49 | Down |
| Coq3     | 874.626 | -0.3644 | 0.13021 | -2.7983 | 0.00514  | 0.0222   | 945.249 | 1106.79 | 901.409 | 732.958 | 796.243 | 765.11  | Down |
| Faxc     | 42.1612 | -0.9363 | 0.38025 | -2.4623 | 0.0138   | 0.04975  | 56.1151 | 53.6625 | 56.3381 | 20.7343 | 36.9609 | 29.1566 | Down |
| Mms22l   | 228.606 | 0.54691 | 0.25166 | 2.17325 | 0.02976  | 0.0913   | 210.915 | 220.399 | 126.045 | 252.959 | 299.911 | 261.404 | Up   |
| Ndufaf4  | 1468.59 | -0.3478 | 0.13531 | -2.5704 | 0.01016  | 0.0387   | 1438.67 | 1839.86 | 1655.77 | 1180.82 | 1341.15 | 1355.28 | Down |
| Fut9     | 51.7851 | -1.8041 | 0.86124 | -2.0947 | 0.03619  | 0.10604  | 27.09   | 177.278 | 37.2404 | 17.6242 | 4.2241  | 47.2538 | Down |
| Bach2    | 978.116 | -0.3224 | 0.13137 | -2.4538 | 0.01413  | 0.05068  | 983.949 | 1158.53 | 1118.17 | 807.602 | 959.927 | 840.515 | Down |
| Ankrd6   | 360.703 | -0.9312 | 0.23208 | -4.0123 | 6.01E-05 | 0.00048  | 462.466 | 452.298 | 505.133 | 276.803 | 167.908 | 299.609 | Down |
| Gm11942  | 99.4112 | -0.999  | 0.31271 | -3.1946 | 0.0014   | 0.0074   | 120.938 | 151.405 | 125.09  | 82.9373 | 72.8658 | 43.2322 | Down |
| Gabrr2   | 55.4137 | -1.0961 | 0.45035 | -2.4339 | 0.01494  | 0.05288  | 82.2376 | 42.1634 | 102.172 | 25.9179 | 32.7368 | 47.2538 | Down |
| Gm12751  | 540.078 | 0.3584  | 0.15279 | 2.34568 | 0.01899  | 0.06413  | 476.978 | 421.634 | 521.366 | 678.012 | 573.422 | 569.057 | Up   |
| Akirin2  | 3165.37 | -0.3054 | 0.09906 | -3.083  | 0.00205  | 0.01016  | 3270.15 | 3680.67 | 3546.44 | 2765.96 | 3003.34 | 2725.64 | Down |
| Smim8    | 588.792 | -0.3202 | 0.14678 | -2.1812 | 0.02917  | 0.08998  | 625.973 | 731.151 | 604.441 | 578.487 | 489.996 | 502.7   | Down |
| Mob3b    | 3184.62 | 0.3131  | 0.11931 | 2.62412 | 0.00869  | 0.03401  | 2478.74 | 2983.06 | 3059.44 | 3415.98 | 3439.47 | 3731.04 | Up   |
| Aco1     | 4670.55 | 0.74461 | 0.1439  | 5.17447 | 2.29E-07 | 3.20E-06 | 4202.83 | 3124.88 | 3146.34 | 5533.99 | 6097.49 | 5917.79 | Up   |
| Ddx58    | 4169.01 | 0.62776 | 0.08985 | 6.98652 | 2.82E-12 | 9.41E-11 | 3510.1  | 3146.92 | 3171.17 | 4979.35 | 5090.04 | 5116.49 | Up   |
| Topors   | 2702.93 | 0.41171 | 0.11217 | 3.67051 | 0.00024  | 0.00164  | 2491.32 | 2221.24 | 2246.84 | 3130.88 | 3321.2  | 2806.07 | Up   |
| Tmem215  | 16.29   | -3.4275 | 0.80562 | -4.2545 | 2.09E-05 | 0.00019  | 35.7976 | 27.7895 | 25.7818 | 4.14686 | 4.2241  | 0       | Down |
| B4galt1  | 7032.63 | 0.34208 | 0.08499 | 4.02516 | 5.69E-05 | 0.00046  | 6311.98 | 5991.03 | 6305.09 | 7654.07 | 8305.64 | 7627.98 | Up   |
| Nfx1     | 3944.77 | -0.2175 | 0.08284 | -2.6251 | 0.00866  | 0.03394  | 4228.95 | 4085.06 | 4410.6  | 3594.29 | 3611.61 | 3738.08 | Down |
| Aqp7     | 39.6833 | -2.7439 | 0.79153 | -3.4666 | 0.00053  | 0.00324  | 28.0575 | 159.071 | 20.0525 | 8.29373 | 10.5603 | 12.0648 | Down |
| Myorg    | 1214.72 | 0.32492 | 0.11156 | 2.91266 | 0.00358  | 0.01638  | 1035.23 | 1122.12 | 1078.06 | 1253.39 | 1457.32 | 1342.21 | Up   |
| 1110017D | 1870.99 | -0.6677 | 0.23626 | -2.8261 | 0.00471  | 0.02064  | 1679.58 | 2675.46 | 2534.26 | 1656.67 | 1019.06 | 1660.92 | Down |
| Dnaic1   | 2046.53 | -0.7653 | 0.25475 | -3.0043 | 0.00266  | 0.01271  | 1767.63 | 3051.1  | 2912.39 | 1595.51 | 1063.42 | 1889.15 | Down |
| Enho     | 443.12  | -0.8171 | 0.25675 | -3.1823 | 0.00146  | 0.00767  | 361.846 | 604.661 | 729.531 | 348.337 | 294.631 | 319.717 | Down |
| Cntfr    | 385.595 | -2.1423 | 0.40626 | -5.2733 | 1.34E-07 | 1.94E-06 | 548.573 | 854.767 | 483.171 | 121.296 | 65.4736 | 240.291 | Down |
| Il11ra1  | 3074.11 | -0.3941 | 0.11359 | -3.4692 | 0.00052  | 0.00322  | 3877.75 | 3250.41 | 3345.91 | 2821.94 | 2621.05 | 2527.58 | Down |
| Ccl27a   | 394.068 | -1.3063 | 0.26163 | -4.9929 | 5.95E-07 | 7.75E-06 | 781.741 | 443.674 | 458.344 | 232.224 | 189.029 | 259.393 | Down |
| Gm13307  | 2.88556 | -4.9252 | 2.41256 | -2.0415 | 0.0412   | 0.11721  | 6.77251 | 10.5408 | 0       | 0       | 0       | 0       | Down |
| Gm17167  | 63.6761 | -2.6437 | 0.57383 | -4.607  | 4.08E-06 | 4.41E-05 | 192.533 | 75.7024 | 61.1125 | 29.028  | 11.6163 | 12.0648 | Down |
| Dnajb5   | 1343.97 | -0.6496 | 0.16596 | -3.9142 | 9.07E-05 | 0.0007   | 1282.91 | 1846.56 | 1795.18 | 1031.53 | 992.664 | 1114.99 | Down |
| Vcp      | 5071.54 | 0.48066 | 0.09113 | 5.27461 | 1.33E-07 | 1.93E-06 | 4520.17 | 4046.73 | 4136.55 | 5701.94 | 5920.08 | 6103.79 | Up   |
| Unc13b   | 3938.28 | 0.20713 | 0.0952  | 2.1757  | 0.02958  | 0.09087  | 3396.9  | 3791.83 | 3779.43 | 4025.57 | 4290.63 | 4345.34 | Up   |
| Cd72     | 522.897 | 1.10753 | 0.29175 | 3.79614 | 0.00015  | 0.00106  | 404.416 | 298.018 | 292.194 | 586.781 | 495.276 | 1060.7  | Up   |
| Arhgef39 | 162.021 | 0.59476 | 0.25316 | 2.34937 | 0.01881  | 0.06369  | 146.093 | 139.906 | 101.218 | 214.6   | 216.485 | 153.826 | Up   |
| Gm12454  | 150.494 | 0.79273 | 0.2447  | 3.23961 | 0.0012   | 0.00648  | 118.035 | 109.241 | 103.127 | 221.857 | 205.925 | 144.778 | Up   |
| Car9     | 239.948 | 2.48411 | 0.3628  | 6.8471  | 7.54E-12 | 2.40E-10 | 107.393 | 48.8712 | 62.0674 | 581.598 | 363.273 | 276.485 | Up   |
| Tpm2     | 2305.61 | -1.6635 | 0.20617 | -8.069  | 7.09E-16 | 4.02E-14 | 2596.77 | 4249.88 | 3667.71 | 1207.77 | 1219.71 | 891.791 | Down |
| Creb3    | 4540.67 | 0.28403 | 0.12534 | 2.266   | 0.02345  | 0.07574  | 3764.55 | 4123.39 | 4397.24 | 5374.33 | 5244.22 | 4340.32 | Up   |
| Npr2     | 5926.57 | -0.5772 | 0.10734 | -5.3772 | 7.56E-08 | 1.15E-06 | 7292.06 | 6494.12 | 7503.47 | 5127.6  | 4678.19 | 4463.98 | Down |
| Spag8    | 864.525 | -0.5355 | 0.20281 | -2.6403 | 0.00828  | 0.03274  | 903.646 | 1165.24 | 1000.72 | 816.932 | 516.396 | 784.213 | Down |
| Hint2    | 1177.36 | -0.2888 | 0.11929 | -2.4213 | 0.01547  | 0.05436  | 1247.11 | 1331.02 | 1306.28 | 1181.86 | 1010.62 | 987.304 | Down |
| Tmem8b   | 741.335 | -0.5041 | 0.15196 | -3.3171 | 0.00091  | 0.00515  | 882.361 | 787.689 | 938.65  | 521.468 | 645.231 | 672.613 | Down |
| Reck     | 3419.39 | -0.8382 | 0.11116 | -7.5397 | 4.71E-14 | 2.10E-12 | 4587.89 | 4210.59 | 4358.09 | 2485.01 | 2675.97 | 2198.81 | Down |
| Glpr2    | 1799.23 | 0.93465 | 0.17095 | 5.46739 | 4.57E-08 | 7.29E-07 | 999.429 | 1442.18 | 1266.17 | 2220.65 | 2722.43 | 2144.52 | Up   |
| Grhpr    | 901.215 | -0.3803 | 0.13077 | -2.9081 | 0.00364  | 0.01658  | 1085.54 | 1042.59 | 930.056 | 780.647 | 713.873 | 854.591 | Down |
| Polr1e   | 371.175 | -0.3757 | 0.14934 | -2.5156 | 0.01188  | 0.044    | 394.741 | 464.755 | 398.186 | 307.905 | 333.704 | 327.761 | Down |
| Tomm5    | 1183.94 | -0.3101 | 0.1221  | -2.54   | 0.01109  | 0.04159  | 1290.65 | 1383.73 | 1257.58 | 1154.9  | 1068.7  | 948.093 | Down |
| Fmpd1    | 376.12  | -0.299  | 0.1484  | -2.015  | 0.0439   | 0.12326  | 385.066 | 409.176 | 450.705 | 347.3   | 312.584 | 351.89  | Down |
| Shb      | 1927.33 | 0.41455 | 0.10135 | 4.09013 | 4.31E-05 | 0.00036  | 1518.01 | 1701.87 | 1736.93 | 2197.84 | 2257.78 | 2151.56 | Up   |
| Aldh1b1  | 426.05  | -2.6053 | 0.41066 | -6.3442 | 2.24E-10 | 5.58E-09 | 549.541 | 1276.4  | 369.54  | 159.654 | 106.659 | 94.5077 | Down |
| Igfbpl1  | 16.0615 | -4.4858 | 0.93916 | -4.7764 | 1.78E-06 | 2.08E-05 | 38.7001 | 31.6225 | 21.9623 | 2.07343 | 0       | 2.0108  | Down |
| Stra6l   | 399.403 | 3.68275 | 0.32659 | 11.2762 | 1.72E-29 | 3.34E-27 | 89.0101 | 40.2469 | 43.9246 | 708.077 | 965.207 | 549.954 | Up   |
| Tmod1    | 2038.11 | -0.2896 | 0.12145 | -2.3844 | 0.01711  | 0.05901  | 2418.75 | 2360.19 | 1947.01 | 1898.23 | 1805.8  | 1798.66 | Down |
| Tstd2    | 685.981 | 0.43489 | 0.17516 | 2.48281 | 0.01303  | 0.04745  | 668.544 | 497.336 | 584.388 | 724.664 | 715.985 | 924.969 | Up   |
| Ncbp1    | 381.139 | 0.56001 | 0.17745 | 3.15583 | 0.0016   | 0.00827  | 366.683 | 273.104 | 284.555 | 416.76  | 454.091 | 491.641 | Up   |
| Xpa      | 1184.41 | -0.2289 | 0.11411 | -2.0064 | 0.04482  | 0.12525  | 1357.4  | 1154.7  | 1322.51 | 1056.41 | 1101.43 | 1113.98 | Down |
| Nans     | 316.463 | 0.38533 | 0.18508 | 2.08197 | 0.03735  | 0.10862  | 231.233 | 270.229 | 321.796 | 334.859 | 391.785 | 348.874 | Up   |
| Trim14   | 1425.55 | 0.30125 | 0.09761 | 3.08617 | 0.00203  | 0.01008  | 1254.85 | 1256.28 | 1320.6  | 1490.8  | 1623.11 | 1607.64 | Up   |
| Coro2a   | 2000.25 | 0.25929 | 0.11849 | 2.18838 | 0.02864  | 0.08875  | 2017.24 | 1779.49 | 1666.27 | 2033    | 2292.63 | 2212.89 | Up   |
| Tbcd2    | 1310.82 | 1.31748 | 0.2367  | 5.56614 | 2.60E-08 | 4.34E-07 | 974.274 | 581.663 | 696.11  | 1775.89 | 2378.17 | 1       |      |

|           |         |         |         |         |          |          |         |         |         |         |         |         |      |
|-----------|---------|---------|---------|---------|----------|----------|---------|---------|---------|---------|---------|---------|------|
| Cavin4    | 75.1003 | -1.4352 | 0.56717 | -2.5305 | 0.01139  | 0.04254  | 51.2776 | 219.441 | 58.2479 | 45.6155 | 33.7928 | 42.2268 | Down |
| Plppr1    | 6.76355 | -2.7828 | 1.08439 | -2.5662 | 0.01028  | 0.03911  | 4.83751 | 13.4156 | 17.1879 | 2.07343 | 1.05603 | 2.0108  | Down |
| Acnat1    | 22.9992 | -2.7961 | 0.93666 | -2.9852 | 0.00283  | 0.01341  | 6.77251 | 77.619  | 36.2855 | 4.14686 | 2.11205 | 11.0594 | Down |
| Zfp189    | 267.297 | -0.4075 | 0.17377 | -2.3451 | 0.01902  | 0.0642   | 341.528 | 266.396 | 306.517 | 238.445 | 219.653 | 231.242 | Down |
| Aldob     | 15.7123 | -1.9356 | 0.74623 | -2.5939 | 0.00949  | 0.03656  | 10.6425 | 40.2469 | 23.8721 | 5.18358 | 5.28013 | 9.04861 | Down |
| Nipsnap3l | 2380.5  | 0.4257  | 0.09724 | 4.3777  | 1.20E-05 | 0.00012  | 2120.76 | 1993.18 | 1981.38 | 2648.81 | 2917.8  | 2621.08 | Up   |
| Abca1     | 3085.78 | -0.6239 | 0.12873 | -4.8468 | 1.25E-06 | 1.51E-05 | 3869.04 | 3647.13 | 3712.58 | 2563.8  | 2049.75 | 2672.36 | Down |
| 4930412Ll | 15.523  | -4.4461 | 1.08095 | -4.1131 | 3.90E-05 | 0.00033  | 16.4475 | 27.7895 | 44.8795 | 0       | 0       | 4.0216  | Down |
| Fsd1l     | 2687.67 | -0.4529 | 0.19673 | -2.3021 | 0.02133  | 0.07012  | 2796.08 | 3428.65 | 3093.82 | 2339.87 | 1648.46 | 2819.14 | Down |
| Tal2      | 31.0253 | 1.2664  | 0.53169 | 2.38187 | 0.01723  | 0.05928  | 14.5125 | 16.2904 | 23.8721 | 57.0194 | 22.1765 | 52.2808 | Up   |
| Klf4      | 9930.99 | -0.5459 | 0.1113  | -4.9053 | 9.33E-07 | 1.16E-05 | 12365.6 | 12094.2 | 10903.8 | 8882.58 | 7956.1  | 7383.66 | Down |
| Ctnnal1   | 1038.77 | -0.2464 | 0.12381 | -1.9903 | 0.04656  | 0.12905  | 1211.31 | 1147.99 | 1022.68 | 980.733 | 877.557 | 992.331 | Down |
| Epb41l4b  | 6350.17 | -0.7269 | 0.11439 | -6.3549 | 2.09E-10 | 5.27E-09 | 8400.82 | 7435.13 | 7915.02 | 5351.53 | 4428.97 | 4569.55 | Down |
| Pakap     | 115.296 | -1.3423 | 0.26581 | -5.05   | 4.42E-07 | 5.90E-06 | 147.06  | 181.111 | 168.059 | 72.5701 | 48.5772 | 74.3997 | Down |
| Txn1      | 11543.3 | 0.34882 | 0.10977 | 3.17755 | 0.00149  | 0.00778  | 10945.3 | 9378.48 | 10139.9 | 13344.6 | 13695.6 | 11756.2 | Up   |
| Ecpas     | 5016.86 | 0.26708 | 0.08502 | 3.14134 | 0.00168  | 0.00861  | 4523.07 | 4608.27 | 4529.96 | 5213.64 | 5785.96 | 5440.22 | Up   |
| Ptgr1     | 3599.42 | 0.28116 | 0.11589 | 2.42612 | 0.01526  | 0.05379  | 3380.45 | 2901.61 | 3467.18 | 4190.41 | 4000.22 | 3656.64 | Up   |
| Shoc1     | 13.6665 | 1.52327 | 0.72361 | 2.10509 | 0.03528  | 0.10393  | 12.5775 | 2.87478 | 5.7293  | 22.8077 | 16.8964 | 21.1134 | Up   |
| Susd1     | 307.184 | 0.91315 | 0.25444 | 3.58889 | 0.00033  | 0.00217  | 269.933 | 231.899 | 137.503 | 383.585 | 393.897 | 426.29  | Up   |
| Ptbp3     | 8945.83 | 0.37486 | 0.0935  | 4.00904 | 6.10E-05 | 0.00049  | 7859.98 | 7342.18 | 8168.07 | 9541.93 | 10659.5 | 10103.3 | Up   |
| Hsd12     | 2344.24 | -0.3159 | 0.14852 | -2.1272 | 0.0334   | 0.09947  | 2635.47 | 3037.68 | 2126.52 | 2038.18 | 2157.46 | 2070.12 | Down |
| Snx30     | 1670.53 | 0.40848 | 0.1507  | 2.71052 | 0.00672  | 0.02756  | 1223.89 | 1458.47 | 1624.26 | 1799.74 | 2155.35 | 1761.46 | Up   |
| Slc31a2   | 2883.56 | 0.35223 | 0.10685 | 3.2971  | 0.00098  | 0.00547  | 2716.74 | 2360.19 | 2522.8  | 2994.04 | 3346.54 | 3361.06 | Up   |
| Fkbp15    | 3755.46 | 0.58955 | 0.11928 | 4.94268 | 7.71E-07 | 9.78E-06 | 3230.49 | 2640    | 3125.33 | 4452.69 | 4833.43 | 4250.83 | Up   |
| Wdr31     | 681.163 | -0.5858 | 0.23171 | -2.5282 | 0.01146  | 0.04281  | 846.564 | 894.055 | 712.343 | 631.36  | 362.217 | 640.44  | Down |
| 4933430l1 | 28.6505 | 1.57323 | 0.49812 | 3.15832 | 0.00159  | 0.00821  | 14.5125 | 15.3321 | 13.3684 | 34.2116 | 62.3055 | 32.1728 | Up   |
| Rgs3      | 3010.25 | -0.2724 | 0.11214 | -2.4294 | 0.01512  | 0.05342  | 3006.99 | 3365.4  | 3508.24 | 2674.73 | 2948.42 | 2557.74 | Down |
| Orm1      | 151.076 | 1.50355 | 0.46075 | 3.26328 | 0.0011   | 0.00605  | 89.0101 | 95.8259 | 51.5637 | 240.518 | 88.7061 | 340.831 | Up   |
| Orm3      | 56.927  | -1.5213 | 0.40799 | -3.7287 | 0.00019  | 0.00135  | 81.2701 | 82.4102 | 89.759  | 19.6976 | 22.1765 | 46.2484 | Down |
| Orm2      | 35.8848 | 1.55502 | 0.71262 | 2.18213 | 0.0291   | 0.08985  | 15.48   | 20.1234 | 19.0977 | 36.2851 | 13.7283 | 110.594 | Up   |
| Atp6v1g1  | 9638.44 | 0.54902 | 0.08315 | 6.60281 | 4.03E-11 | 1.14E-09 | 7622.94 | 7824.18 | 8031.52 | 11854.8 | 11667   | 10830.2 | Up   |
| Tmem268   | 1931.59 | 1.48058 | 0.10878 | 13.6109 | 3.45E-42 | 2.01E-39 | 1118.43 | 1011.92 | 927.191 | 2829.2  | 2834.37 | 2868.41 | Up   |
| Tnfrsf15  | 276.285 | 1.38245 | 0.28135 | 4.91367 | 8.94E-07 | 1.12E-05 | 217.688 | 103.492 | 138.458 | 346.263 | 403.402 | 448.409 | Up   |
| Tnc       | 790.75  | 1.58483 | 0.18308 | 8.6564  | 4.87E-18 | 3.66E-16 | 333.788 | 418.759 | 433.517 | 1094.77 | 1435.14 | 1028.53 | Up   |
| Pappa     | 117.232 | -1.2284 | 0.28776 | -4.2689 | 1.96E-05 | 0.00018  | 116.1   | 193.568 | 183.338 | 64.2764 | 69.6977 | 76.4105 | Down |
| Astn2     | 1318.62 | -0.3321 | 0.08998 | -3.6909 | 0.00022  | 0.00153  | 1477.37 | 1453.68 | 1478.16 | 1180.82 | 1158.46 | 1163.25 | Down |
| Tlr4      | 2790.08 | 0.9842  | 0.09151 | 10.7546 | 5.64E-27 | 9.28E-25 | 1845.03 | 1994.14 | 1781.81 | 3641.98 | 3761.56 | 3715.96 | Up   |
| Brinp1    | 168.709 | 1.31721 | 0.27511 | 4.78791 | 1.69E-06 | 1.98E-05 | 79.3351 | 118.824 | 91.6688 | 192.829 | 309.415 | 220.183 | Up   |
| Cdk5rap2  | 845.689 | -0.2834 | 0.12188 | -2.3256 | 0.02004  | 0.06692  | 863.979 | 925.678 | 995.943 | 780.647 | 708.593 | 799.294 | Down |
| Megf9     | 3529.04 | 0.27811 | 0.13065 | 2.12874 | 0.03328  | 0.09921  | 3631.03 | 2875.73 | 3063.26 | 3857.62 | 3544.02 | 4202.58 | Up   |
| Rasef     | 3118    | 0.5944  | 0.11223 | 5.29607 | 1.18E-07 | 1.73E-06 | 2584.2  | 2378.4  | 2491.29 | 3328.89 | 3976.99 | 3948.21 | Up   |
| 2310002Ll | 109.998 | -8.332  | 1.60548 | -5.1897 | 2.11E-07 | 2.97E-06 | 91.9126 | 490.628 | 75.4357 | 0       | 0       | 2.0108  | Down |
| Dmac1     | 819.953 | -0.2834 | 0.13548 | -2.0916 | 0.03647  | 0.1067   | 840.759 | 958.259 | 901.409 | 750.582 | 814.196 | 654.516 | Down |
| Ptprd     | 2326.39 | -0.5744 | 0.11687 | -4.915  | 8.88E-07 | 1.11E-05 | 2539.69 | 3088.47 | 2722.37 | 1755.16 | 1907.18 | 1945.45 | Down |
| Lurap1l   | 3959.77 | 0.35182 | 0.12202 | 2.88331 | 0.00394  | 0.01773  | 3863.23 | 3324.2  | 3250.42 | 4562.59 | 4763.73 | 3994.46 | Up   |
| Mpdz      | 1722.18 | -0.696  | 0.1174  | -5.9287 | 3.05E-09 | 6.17E-08 | 2032.72 | 2189.62 | 2166.63 | 1221.25 | 1473.16 | 1249.71 | Down |
| Gm5860    | 26.603  | -1.2    | 0.58762 | -2.0421 | 0.04114  | 0.11711  | 24.1875 | 41.2051 | 45.8344 | 25.9179 | 7.39218 | 15.081  | Down |
| Nfib      | 9915.18 | -0.2549 | 0.08377 | -3.0434 | 0.00234  | 0.01136  | 10355.2 | 10946.2 | 11065.2 | 8845.26 | 9502.12 | 8777.15 | Down |
| Ttc39b    | 3037.41 | 0.40575 | 0.08692 | 4.66786 | 3.04E-06 | 3.38E-05 | 2672.24 | 2478.06 | 2688.95 | 3376.58 | 3501.78 | 3506.84 | Up   |
| Snappc3   | 1019.05 | -0.286  | 0.11242 | -2.5439 | 0.01096  | 0.0412   | 1164.87 | 1042.59 | 1151.59 | 898.833 | 973.655 | 882.742 | Down |
| Gm12551   | 5.30179 | 2.86209 | 1.25822 | 2.27472 | 0.02292  | 0.07433  | 1.935   | 0.95826 | 0.95488 | 18.6609 | 5.28013 | 4.0216  | Up   |
| Plin2     | 12721.2 | 0.93304 | 0.16286 | 5.72901 | 1.01E-08 | 1.83E-07 | 9369.28 | 8721.11 | 8145.15 | 16342.8 | 20382.3 | 13366.8 | Up   |
| Dennd4c   | 1985.23 | 0.40122 | 0.1405  | 2.85569 | 0.00429  | 0.01908  | 1994.02 | 1656.83 | 1481.98 | 2233.33 | 2390.84 | 2119.39 | Up   |
| Acer2     | 20005.4 | -0.6995 | 0.09808 | -7.1318 | 9.91E-13 | 3.56E-11 | 25517.9 | 22394.5 | 26374.8 | 15505.1 | 14826.6 | 15413.8 | Down |
| Slc24a2   | 99.9118 | -1.8267 | 0.48065 | -3.8005 | 0.00014  | 0.00105  | 132.548 | 260.646 | 74.4809 | 29.028  | 46.4651 | 56.3024 | Down |
| Cdkn2a    | 97.8764 | 1.42441 | 0.32152 | 4.43021 | 9.41E-06 | 9.30E-05 | 53.2126 | 43.1216 | 63.0223 | 173.132 | 155.236 | 99.5347 | Up   |
| Gm12648   | 50.7915 | 2.19355 | 0.45841 | 4.78508 | 1.71E-06 | 2.00E-05 | 8.70751 | 28.7478 | 17.1879 | 72.5701 | 96.0983 | 81.4375 | Up   |
| Tek       | 14521.7 | -0.4841 | 0.15657 | -3.0917 | 0.00199  | 0.00993  | 16433   | 14817.6 | 19555   | 10831.6 | 14321.8 | 11171   | Down |
| Gm12708   | 24.158  | 1.23392 | 0.5177  | 2.38348 | 0.01715  | 0.05907  | 14.5125 | 15.3321 | 13.3684 | 29.028  | 48.5772 | 24.1296 | Up   |
| Hook1     | 1637.99 | 0.56716 | 0.12273 | 4.62113 | 3.82E-06 | 4.15E-05 | 1376.75 | 1312.81 | 1270.95 | 2079.65 | 1707.59 | 2080.17 | Up   |
| Cyp2j9    | 373.951 | -0.6552 | 0.1754  | -3.7356 | 0.00019  | 0.00132  | 450.856 | 476.255 | 444.975 | 281.987 | 345.32  | 244.312 | Down |
| Nfia      | 3864.47 | -0.3027 | 0.10188 | -2.9707 | 0.00297  | 0.01396  | 4178.64 | 4625.51 | 4000.96 | 3273.95 | 3535.57 | 3572.19 | Down |
| Patj      | 3918.8  | 0.49034 | 0.1205  | 4.06927 | 4.72E-05 | 0.00039  | 3718.11 | 2923.65 | 3135.84 | 4468.25 | 4743.67 | 4523.3  | Up   |
| Kank4     | 1784.45 | -0.6255 | 0.1246  | -5.0201 | 5.16E-07 | 6.78E-06 | 2170.11 | 2152.25 | 2173.31 | 1371.58 | 1597.77 | 1241.67 | Down |
| Atg4c     | 984.569 | 0.64382 | 0.13153 | 4.89476 | 9.84E-07 | 1.22E-05 | 854.304 | 698.571 | 752.448 | 1151.79 | 1303.14 | 1147.16 | Up   |
| Foxd3     | 3.35894 | -5.1446 | 1.95096 | -2.6369 | 0.00837  | 0.03299  | 3.87001 | 14.3739 | 1.90977 | 0       | 0       | 0       | Down |
| Itgb3bp   | 478.073 | -0.2852 | 0.13195 | -2.1616 | 0.03065  | 0.09319  | 512.776 | 515.543 | 547.148 | 400.172 | 461.483 | 431.317 | Down |
| Pgm1      | 5150.81 | 1.11595 | 0.14516 | 7.68785 | 1.50E-14 | 7.03E-13 | 3612.65 | 3538.85 | 2605.88 | 7023.75 | 6834.6  | 7289.16 | Up   |
| Ror1      | 671.557 | 0.44855 | 0.15155 | 2.95983 | 0.00308  | 0.0144   | 539.866 | 581.663 | 582.479 | 647.947 | 825.812 | 851.575 | Up   |
| Cachd1    | 1632.46 | 0.38922 | 0.14679 | 2.65147 | 0.00801  | 0.03185  | 1508.33 | 1256.28 | 1476.25 | 2088.98 | 1579.81 | 1885.13 | Up   |
| Raver2    | 3104.55 | -0.5744 | 0.14231 | -4.0365 | 5.43E-05 | 0.00044  | 3622.33 | 3400.86 | 4120.32 | 2260.04 | 2908.29 | 2315.44 | Down |
| E130102H  | 226.943 | -0.5133 | 0.25625 | -2.0031 | 0.04516  | 0.12598  | 278.64  | 183.027 | 338.983 | 190.756 | 194.309 | 175.945 | Down |
| 0610043K  | 110.907 | -0.8233 | 0.29983 | -2.7458 | 0.00604  | 0.02529  | 130.613 | 132.24  | 162.33  | 52.8725 | 91.8742 | 95.5131 | Down |
| Ak4       | 171.158 | -0.525  | 0.21864 | -2.4013 | 0.01634  | 0.05681  | 193.5   | 241.481 | 170.924 | 149.287 | 132.003 | 139.751 | Down |
| Lepr      | 4880.33 | -0.4008 | 0.12464 | -3.2156 | 0.0013   | 0.00697  | 5775.02 | 4884.24 | 6002.39 | 3827.55 | 4540.91 | 4251.84 | Down |
| Sgip1     | 513.141 | -0.4167 | 0.14839 | -2.8083 | 0.00498  | 0.02165  | 577.598 | 644.908 | 537.599 | 412.613 | 487.884 | 418.247 | Down |
| Gm12709   | 155.214 | -0.8747 | 0.23866 | -3.6649 | 0.00025  | 0.00167  | 167.378 | 1       |         |         |         |         |      |

|           |         |         |         |         |          |          |         |         |         |         |         |         |      |
|-----------|---------|---------|---------|---------|----------|----------|---------|---------|---------|---------|---------|---------|------|
| Plpp3     | 11542.9 | -0.8817 | 0.10341 | -8.5256 | 1.52E-17 | 1.09E-15 | 13439.6 | 15113.7 | 16339   | 8029.36 | 8153.57 | 8181.95 | Down |
| Hspd1-ps  | 12.7882 | -2.1129 | 0.73115 | -2.8899 | 0.00385  | 0.01743  | 13.545  | 28.7478 | 20.0525 | 5.18358 | 3.16808 | 6.03241 | Down |
| Gm12724   | 3.69547 | -3.3028 | 1.5924  | -2.0741 | 0.03807  | 0.11025  | 5.80501 | 9.58259 | 4.77441 | 0       | 0       | 2.0108  | Down |
| Dhcr24    | 1631.83 | 1.42228 | 0.12644 | 11.249  | 2.34E-29 | 4.47E-27 | 857.206 | 973.591 | 829.793 | 2154.3  | 2377.11 | 2598.96 | Up   |
| Lexm      | 10.9669 | 2.10091 | 1.04421 | 2.01195 | 0.04423  | 0.1239   | 0       | 5.74955 | 6.68418 | 25.9179 | 6.33615 | 21.1134 | Up   |
| Ttc22     | 233.445 | 1.67623 | 0.25533 | 6.56496 | 5.20E-11 | 1.44E-09 | 74.4976 | 143.739 | 115.541 | 327.602 | 363.273 | 376.02  | Up   |
| Acot11    | 212.943 | 0.94741 | 0.22486 | 4.21335 | 2.52E-05 | 0.00022  | 184.793 | 131.281 | 120.315 | 271.62  | 264.006 | 305.642 | Up   |
| Cyb5rl    | 815.825 | -0.4966 | 0.14446 | -3.4378 | 0.00059  | 0.00355  | 833.019 | 999.464 | 1032.23 | 713.261 | 606.159 | 710.818 | Down |
| Tceanc2   | 879.194 | 0.38569 | 0.1221  | 3.15889 | 0.00158  | 0.0082   | 833.986 | 734.984 | 718.072 | 1002.5  | 1047.58 | 938.039 | Up   |
| Lrrc42    | 1688.44 | 0.27002 | 0.11345 | 2.38014 | 0.01731  | 0.05953  | 1608.95 | 1494.88 | 1488.66 | 1850.54 | 2009.62 | 1678.01 | Up   |
| Dio1      | 378.333 | 1.5904  | 0.35172 | 4.52181 | 6.13E-06 | 6.35E-05 | 210.915 | 225.191 | 129.864 | 666.608 | 290.407 | 747.013 | Up   |
| Yipf1     | 2334.56 | 0.27047 | 0.10675 | 2.53358 | 0.01129  | 0.04224  | 2298.78 | 2106.25 | 1944.14 | 2665.4  | 2474.27 | 2518.53 | Up   |
| Ndc1      | 685.964 | -0.3055 | 0.13659 | -2.2364 | 0.02532  | 0.0805   | 773.034 | 823.144 | 678.922 | 585.744 | 591.374 | 663.565 | Down |
| 4933424N  | 32.3582 | 1.34613 | 0.50505 | 2.66534 | 0.00769  | 0.03079  | 27.09   | 13.4156 | 14.3232 | 30.0648 | 55.9693 | 53.2862 | Up   |
| Lrp8      | 239.949 | 1.81618 | 0.35867 | 5.0637  | 4.11E-07 | 5.51E-06 | 153.833 | 98.7006 | 65.8869 | 290.28  | 535.405 | 295.588 | Up   |
| Magoh     | 2103.4  | -0.2944 | 0.13745 | -2.1415 | 0.03224  | 0.09674  | 2019.18 | 2275.86 | 2656.48 | 1992.57 | 1940.97 | 1735.32 | Down |
| Czib      | 3097.15 | -0.446  | 0.12965 | -3.44   | 0.00058  | 0.00353  | 3319.5  | 3334.74 | 4062.07 | 2370.97 | 2791.08 | 2704.53 | Down |
| Scp2      | 247.576 | 0.63353 | 0.22452 | 2.82171 | 0.00478  | 0.02088  | 227.363 | 204.109 | 150.871 | 295.464 | 259.782 | 347.869 | Up   |
| Echdc2    | 1989.17 | -0.2149 | 0.09399 | -2.2865 | 0.02222  | 0.07248  | 2244.6  | 2012.34 | 2154.22 | 1823.58 | 1875.5  | 1824.8  | Down |
| Txndc12   | 2833.13 | 0.30775 | 0.08683 | 3.54436 | 0.00039  | 0.00252  | 2645.15 | 2436.85 | 2514.21 | 3114.29 | 3218.77 | 3069.49 | Up   |
| Osbpl9    | 14069   | 0.36645 | 0.08956 | 4.0916  | 4.28E-05 | 0.00036  | 12811.7 | 11794.2 | 12269.3 | 14961.9 | 16778.1 | 15798.9 | Up   |
| Ttc39aos1 | 86.4409 | 1.36513 | 0.31008 | 4.40246 | 1.07E-05 | 0.001    | 49.3426 | 62.2868 | 33.4209 | 113.002 | 129.891 | 130.702 | Up   |
| Rnf11     | 10144.3 | 0.23589 | 0.09201 | 2.56365 | 0.01036  | 0.03935  | 9134.18 | 9788.61 | 9027.46 | 10575.5 | 11745.1 | 10594.9 | Up   |
| Agbl4     | 285.168 | -1.0954 | 0.27863 | -3.9312 | 8.45E-05 | 0.00065  | 275.738 | 524.167 | 365.72  | 186.609 | 143.619 | 215.156 | Down |
| Slc5a9    | 114.873 | 1.31575 | 0.57964 | 2.26994 | 0.02321  | 0.07515  | 25.155  | 140.864 | 31.5111 | 168.985 | 125.667 | 197.059 | Up   |
| Trabd2b   | 1143.26 | -0.479  | 0.1608  | -2.9791 | 0.00289  | 0.01362  | 1221.95 | 1606.04 | 1165.91 | 915.42  | 1043.35 | 906.872 | Down |
| Foxd2     | 39.416  | -0.867  | 0.39857 | -2.1753 | 0.02961  | 0.09094  | 58.0501 | 38.3303 | 56.3381 | 23.8445 | 33.7928 | 26.1404 | Down |
| Cmpk1     | 5340.11 | 0.31711 | 0.09258 | 3.4254  | 0.00061  | 0.00369  | 4655.62 | 4866.04 | 4744.81 | 5763.1  | 6387.9  | 5623.21 | Up   |
| Stil      | 91.74   | 1.54946 | 0.35108 | 4.41342 | 1.02E-05 | 9.94E-05 | 43.5376 | 64.2033 | 32.466  | 129.589 | 107.715 | 172.929 | Up   |
| Tal1      | 1089.21 | -0.3852 | 0.1436  | -2.6822 | 0.00732  | 0.02958  | 1175.51 | 1091.46 | 1434.23 | 884.319 | 991.608 | 958.147 | Down |
| Pdzk1ip1  | 1365.69 | 0.73772 | 0.15075 | 4.89361 | 9.90E-07 | 1.22E-05 | 1219.05 | 936.219 | 916.688 | 1604.84 | 1666.41 | 1850.94 | Up   |
| Cyp4a12a  | 36.9113 | 3.95014 | 0.69941 | 5.64783 | 1.62E-08 | 2.82E-07 | 6.77251 | 2.87478 | 3.81953 | 125.443 | 44.3531 | 38.2052 | Up   |
| Cyp4a32   | 704.148 | -1.1166 | 0.16816 | -6.6402 | 3.13E-11 | 9.02E-10 | 828.181 | 1036.84 | 1026.5  | 506.954 | 377.001 | 449.414 | Down |
| Cyp4b1    | 33590.1 | -0.958  | 0.11525 | -8.3123 | 9.38E-17 | 5.94E-15 | 45829.6 | 40612   | 46607.8 | 25259.6 | 22556.7 | 20675.1 | Down |
| Mknk1     | 2843.07 | 0.27776 | 0.09312 | 2.98274 | 0.00286  | 0.01349  | 2720.61 | 2440.68 | 2549.54 | 3054.16 | 3054.03 | 3239.4  | Up   |
| Uqcrh     | 5117.88 | -0.2799 | 0.11641 | -2.4046 | 0.01619  | 0.05646  | 4918.78 | 6198.02 | 5721.66 | 4803.1  | 4509.23 | 4556.48 | Down |
| Lrrc41    | 1205.47 | 0.32858 | 0.15437 | 2.12853 | 0.03329  | 0.09922  | 1279.04 | 929.511 | 997.853 | 1442.07 | 1310.53 | 1273.84 | Up   |
| Rad54l    | 57.9214 | 0.92136 | 0.31649 | 2.9112  | 0.0036   | 0.01644  | 43.5376 | 42.1634 | 34.3758 | 85.0107 | 77.0899 | 65.3511 | Up   |
| Tspan1    | 13099.5 | 1.2122  | 0.19953 | 6.07526 | 1.24E-09 | 2.70E-08 | 7169.19 | 9948.64 | 6578.19 | 19059   | 14338.7 | 21503.5 | Up   |
| Pik3r3    | 2309.05 | 1.18176 | 0.13426 | 8.80172 | 1.35E-18 | 1.05E-16 | 1177.45 | 1572.5  | 1488.66 | 3191.01 | 3149.07 | 3275.6  | Up   |
| Ipp       | 391.587 | 0.49204 | 0.19852 | 2.47855 | 0.01319  | 0.04791  | 387.968 | 333.474 | 254.954 | 511.101 | 427.69  | 434.333 | Up   |
| C530005A  | 66.7911 | -0.7416 | 0.32603 | -2.2747 | 0.02292  | 0.07433  | 90.9451 | 89.1181 | 70.6613 | 63.2397 | 48.5772 | 38.2052 | Down |
| Ccdc17    | 6117.08 | -0.6673 | 0.19501 | -3.4218 | 0.00062  | 0.00373  | 6194.91 | 8590.79 | 7735.51 | 5512.22 | 3512.34 | 5156.7  | Down |
| Akr1a1    | 28678.3 | 0.45541 | 0.0851  | 5.35172 | 8.71E-08 | 1.30E-06 | 24957.7 | 24416.4 | 23193.2 | 33586.5 | 34582.7 | 31333.3 | Up   |
| Prdx1     | 28990.2 | 0.38971 | 0.0899  | 4.33481 | 1.46E-05 | 0.00014  | 27187.8 | 24437.5 | 23669.6 | 32981   | 33016.6 | 32648.4 | Up   |
| Ccdc163   | 731.17  | -0.4488 | 0.12234 | -3.6681 | 0.00024  | 0.00165  | 848.499 | 777.148 | 906.184 | 620.993 | 641.007 | 593.187 | Down |
| Mutyh     | 184.574 | -0.5451 | 0.2042  | -2.6694 | 0.0076   | 0.0305   | 247.68  | 203.151 | 206.255 | 171.058 | 142.563 | 136.735 | Down |
| Zswim5    | 313.697 | 0.35839 | 0.16381 | 2.1879  | 0.02868  | 0.08881  | 286.38  | 248.189 | 290.284 | 317.235 | 359.049 | 381.047 | Up   |
| Tctex1d4  | 1471.68 | -0.5914 | 0.22319 | -2.6496 | 0.00806  | 0.032    | 1565.42 | 2181    | 1561.23 | 1293.82 | 831.092 | 1397.51 | Down |
| Plk3      | 1249.02 | 0.7821  | 0.24489 | 3.19364 | 0.0014   | 0.00742  | 1071.99 | 814.52  | 868.943 | 1598.62 | 2101.49 | 1038.58 | Up   |
| Kif2c     | 66.9503 | 0.99143 | 0.34647 | 2.86148 | 0.00422  | 0.01878  | 49.3426 | 48.8712 | 36.2855 | 74.6435 | 73.9218 | 118.637 | Up   |
| Dmap1     | 1567.88 | -0.2872 | 0.12724 | -2.2574 | 0.02399  | 0.07708  | 1590.57 | 1804.4  | 1775.13 | 1545.74 | 1446.75 | 1244.69 | Down |
| Atp6v0b   | 2567.36 | 0.31882 | 0.09891 | 3.22322 | 0.00127  | 0.00682  | 2422.62 | 2204.95 | 2226.79 | 2918.36 | 2961.1  | 2670.34 | Up   |
| St3gal3   | 1394.2  | 0.32592 | 0.1101  | 2.96025 | 0.00307  | 0.01438  | 1137.78 | 1351.14 | 1223.2  | 1573.73 | 1527.01 | 1552.34 | Up   |
| Kdm4a     | 3012.27 | 0.28851 | 0.08219 | 3.5102  | 0.00045  | 0.00282  | 2682.88 | 2748.29 | 2705.18 | 3231.44 | 3267.34 | 3438.47 | Up   |
| Ptprf     | 20496.2 | 0.90401 | 0.14309 | 6.31788 | 2.65E-10 | 6.53E-09 | 16984.5 | 13145.4 | 12700.9 | 25667   | 25126   | 29353.7 | Up   |
| Szt2      | 3992.94 | 0.69159 | 0.08759 | 7.89541 | 2.89E-15 | 1.51E-13 | 3030.21 | 2984.02 | 3147.29 | 4780.3  | 4802.8  | 5213    | Up   |
| Med8      | 3213.87 | 0.48431 | 0.10146 | 4.77339 | 1.81E-06 | 2.11E-05 | 2728.35 | 2614.13 | 2695.63 | 3978.92 | 3861.88 | 3404.29 | Up   |
| Elov1l    | 46610.5 | 1.92474 | 0.20388 | 9.44046 | 3.71E-21 | 3.59E-19 | 26653.7 | 15797.9 | 15852   | 73877.4 | 77868.1 | 69614   | Up   |
| Cdc20     | 308.801 | 0.4577  | 0.15545 | 2.9444  | 0.00324  | 0.01502  | 266.063 | 262.563 | 252.089 | 391.879 | 326.312 | 353.901 | Up   |
| Mpl       | 111.78  | -1.648  | 0.30583 | -5.3887 | 7.10E-08 | 1.08E-06 | 119.003 | 213.692 | 175.698 | 58.0561 | 55.9693 | 48.2592 | Down |
| Tie1      | 12937.9 | -0.3617 | 0.11494 | -3.147  | 0.00165  | 0.00848  | 14221.3 | 13153.1 | 16279.8 | 11561.5 | 11821.1 | 10590.9 | Down |
| Tmem125   | 885.031 | 0.34712 | 0.16233 | 2.13836 | 0.03249  | 0.09729  | 681.121 | 888.306 | 767.726 | 1148.68 | 913.462 | 910.893 | Up   |
| Cfap57    | 1393.95 | -0.7253 | 0.20375 | -3.56   | 0.00037  | 0.00239  | 1577.99 | 1742.11 | 1891.62 | 1161.12 | 737.106 | 1253.73 | Down |
| Ebna1bp2  | 2455.84 | -0.2255 | 0.10361 | -2.1765 | 0.02952  | 0.09079  | 2590    | 2463.68 | 2888.52 | 2277.66 | 2200.76 | 2314.43 | Down |
| Olf1342   | 105.567 | 1.49425 | 0.43276 | 3.45283 | 0.00055  | 0.00338  | 30.96   | 77.619  | 57.293  | 124.406 | 236.55  | 106.572 | Up   |
| Ccdc30    | 2235.21 | -0.4166 | 0.19611 | -2.124  | 0.03367  | 0.10012  | 2292.98 | 2766.49 | 2607.79 | 2135.63 | 1363.33 | 2245.06 | Down |
| Ppcs      | 721.659 | 0.30748 | 0.13328 | 2.307   | 0.02105  | 0.06942  | 696.601 | 580.705 | 657.914 | 851.144 | 740.274 | 803.315 | Up   |
| Zmynd12   | 580.392 | -0.7477 | 0.20913 | -3.5752 | 0.00035  | 0.00227  | 646.291 | 828.894 | 707.568 | 431.274 | 328.424 | 539.9   | Down |
| Frg2f1    | 164.541 | -0.4339 | 0.20125 | -2.156  | 0.03108  | 0.09417  | 172.215 | 208.9   | 186.202 | 152.397 | 127.779 | 139.751 | Down |
| Foxo6     | 150.271 | -0.8531 | 0.2258  | -3.7779 | 0.00016  | 0.00114  | 223.493 | 186.86  | 169.969 | 121.296 | 103.49  | 96.5185 | Down |
| Foxo6os   | 15.216  | -5.4417 | 1.24911 | -4.3565 | 1.32E-05 | 0.00013  | 24.1875 | 46.9547 | 18.1428 | 0       | 0       | 2.0108  | Down |
| Scmh1     | 3302.34 | 0.23559 | 0.08975 | 2.62507 | 0.00866  | 0.03394  | 3067.95 | 2915.98 | 3115.78 | 3600.51 | 3724.6  | 3389.21 | Up   |
| Ctps      | 6322.25 | 1.85822 | 0.14187 | 13.0977 | 3.39E-39 | 1.56E-36 | 3273.06 | 2359.23 | 2568.63 | 9696.4  | 9637.29 | 10398.9 | Up   |
| Gm8439    | 33.8264 | 4.05307 | 0.58574 | 6.91961 | 4.53E-12 | 1.47E-10 | 5.80501 | 1.91652 | 3.81953 | 57.0194 | 77.0899 | 57.3078 | Up   |
| Gm12860   | 27.3287 | 5.05189 | 0.81427 | 6.20421 | 5.50E-10 | 1.27E-08 | 0       | 3.83303 | 0.95488 | 43.5421 | 63.3615 | 52.2808 | Up   |
| Cited4    | 282.109 | 1.62922 | 0.28927 | 5.63212 | 1.78E-08 | 3.06E-07 | 94.8151 | 176.32  | 142.2   |         |         |         |      |

|          |         |         |         |         |          |          |         |         |         |         |         |         |      |
|----------|---------|---------|---------|---------|----------|----------|---------|---------|---------|---------|---------|---------|------|
| Hpcal4   | 497.39  | -1.0229 | 0.33874 | -3.0198 | 0.00253  | 0.01217  | 418.928 | 1059.83 | 521.366 | 251.922 | 322.088 | 410.204 | Down |
| Macf1    | 35414.9 | -0.4494 | 0.1069  | -4.2041 | 2.62E-05 | 0.00023  | 37857.4 | 40720.2 | 44082.2 | 30435.9 | 31939.5 | 27454.5 | Down |
| Gm12922  | 14.6873 | -1.5233 | 0.62742 | -2.4278 | 0.01519  | 0.05361  | 28.0575 | 20.1234 | 17.1879 | 9.33044 | 7.39218 | 6.03241 | Down |
| Akirin1  | 5275.64 | 0.46794 | 0.0765  | 6.11657 | 9.56E-10 | 2.12E-08 | 4372.14 | 4401.28 | 4508.96 | 5955.93 | 6267.51 | 6148.03 | Up   |
| Rhbd12   | 221.346 | 2.3805  | 0.3573  | 6.66239 | 2.69E-11 | 7.90E-10 | 43.5376 | 117.866 | 52.5186 | 345.226 | 436.138 | 332.788 | Up   |
| Gm12905  | 649.421 | -0.3156 | 0.12963 | -2.4345 | 0.01491  | 0.05283  | 744.009 | 718.694 | 698.019 | 590.928 | 518.508 | 626.365 | Down |
| Rragc    | 5951.43 | 0.4192  | 0.11254 | 3.72494 | 0.0002   | 0.00137  | 5591.19 | 4841.12 | 4846.03 | 6520.94 | 7436.53 | 6472.77 | Up   |
| Utp11    | 2190.04 | -0.2558 | 0.10874 | -2.3522 | 0.01866  | 0.06328  | 2206.87 | 2426.31 | 2518.03 | 1930.36 | 1906.13 | 2152.56 | Down |
| Fhl3     | 187.989 | 0.45907 | 0.22042 | 2.08273 | 0.03728  | 0.10848  | 124.808 | 176.32  | 173.789 | 199.049 | 241.83  | 212.14  | Up   |
| Sf3a3    | 2052.2  | -0.2337 | 0.11368 | -2.056  | 0.03978  | 0.11401  | 2213.64 | 2001.8  | 2438.77 | 1812.18 | 1911.41 | 1935.4  | Down |
| Gm12915  | 7.10805 | 6.32965 | 1.54    | 4.11017 | 3.95E-05 | 0.00033  | 0       | 0       | 0       | 10.3672 | 23.2326 | 9.04861 | Up   |
| Inpp5b   | 7283.14 | 0.50184 | 0.08732 | 5.74685 | 9.09E-09 | 1.67E-07 | 6103.97 | 5735.18 | 6247.8  | 8501.07 | 8931.86 | 8178.94 | Up   |
| Cdca8    | 129.235 | 0.7575  | 0.27636 | 2.74095 | 0.00613  | 0.02559  | 108.36  | 111.158 | 68.7516 | 147.214 | 148.9   | 191.026 | Up   |
| Dnali1   | 4026.65 | -0.8018 | 0.21523 | -3.7255 | 0.00019  | 0.00136  | 4522.1  | 5671.93 | 5159.23 | 3151.62 | 1984.27 | 3670.72 | Down |
| Zc3h12a  | 1217.76 | 1.34886 | 0.16703 | 8.07566 | 6.71E-16 | 3.84E-14 | 799.156 | 665.99  | 594.892 | 1784.19 | 1483.72 | 1978.63 | Up   |
| Sh3d21   | 1306.9  | -0.3638 | 0.16931 | -2.149  | 0.03163  | 0.09546  | 1508.33 | 1192.07 | 1712.11 | 1292.78 | 1041.24 | 1094.88 | Down |
| Col8a2   | 1787.08 | -0.5397 | 0.17014 | -3.1718 | 0.00152  | 0.0079   | 2143.02 | 2063.13 | 2146.58 | 1485.61 | 1124.67 | 1759.45 | Down |
| Tekt2    | 538.74  | -0.9574 | 0.2053  | -4.6633 | 3.11E-06 | 3.45E-05 | 564.053 | 782.897 | 786.824 | 394.989 | 291.463 | 412.214 | Down |
| Clspn    | 72.7447 | 1.00491 | 0.36483 | 2.75443 | 0.00588  | 0.02478  | 67.7251 | 44.0799 | 33.4209 | 101.598 | 76.0338 | 113.61  | Up   |
| AU04032C | 3586.23 | 0.51443 | 0.09567 | 5.37688 | 7.58E-08 | 1.15E-06 | 3033.12 | 2921.73 | 2905.71 | 3933.3  | 4522.96 | 4200.56 | Up   |
| Zmym1    | 429.993 | -0.8066 | 0.24314 | -3.3174 | 0.00091  | 0.00515  | 456.661 | 540.458 | 644.546 | 325.529 | 219.653 | 393.112 | Down |
| Gjb3     | 210.89  | 1.68267 | 0.1958  | 8.59391 | 8.41E-18 | 6.21E-16 | 108.36  | 88.1598 | 104.082 | 326.565 | 288.295 | 349.88  | Up   |
| Gjb4     | 44.4222 | 2.93636 | 0.52165 | 5.62898 | 1.81E-08 | 3.12E-07 | 19.35   | 5.74955 | 5.7293  | 81.9006 | 83.426  | 70.3781 | Up   |
| A3galt2  | 76.3819 | -0.9108 | 0.37174 | -2.45   | 0.01428  | 0.05108  | 68.6926 | 87.2015 | 143.232 | 44.5788 | 62.3055 | 52.2808 | Down |
| Trim62   | 1632.88 | 0.43846 | 0.11974 | 3.66181 | 0.00025  | 0.00169  | 1392.23 | 1415.35 | 1352.11 | 1811.14 | 2115.22 | 1711.19 | Up   |
| Azin2    | 1890.01 | -0.4519 | 0.17088 | -2.6445 | 0.00818  | 0.03241  | 2633.54 | 2059.3  | 1858.2  | 1718.87 | 1355.94 | 1714.21 | Down |
| Rnf19b   | 2906.04 | 0.36249 | 0.11575 | 3.13172 | 0.00174  | 0.00886  | 2814.46 | 2307.49 | 2506.57 | 3274.99 | 3453.2  | 3079.54 | Up   |
| Fndc5    | 913.384 | -3.9563 | 0.68602 | -5.767  | 8.07E-09 | 1.49E-07 | 1185.19 | 3184.29 | 779.184 | 119.222 | 68.6416 | 143.772 | Down |
| C77080   | 4937.78 | 0.87058 | 0.1306  | 6.66592 | 2.63E-11 | 7.72E-10 | 3746.17 | 3074.09 | 3654.34 | 6309.45 | 7101.77 | 5740.84 | Up   |
| Zbtb8os  | 1191.32 | 0.24111 | 0.10756 | 2.24177 | 0.02498  | 0.07964  | 1069.09 | 1120.2  | 1086.66 | 1192.22 | 1370.72 | 1309.03 | Up   |
| Bsdc1    | 4024.1  | 0.2598  | 0.09762 | 2.66126 | 0.00778  | 0.03111  | 3826.47 | 3508.18 | 3653.38 | 4553.26 | 4052.53 | 4050.76 | Up   |
| Fam229a  | 8.50267 | 2.29569 | 0.90078 | 2.54854 | 0.01082  | 0.04082  | 0.9675  | 4.79129 | 2.86465 | 18.6609 | 12.6723 | 11.0594 | Up   |
| Lck      | 615.656 | -0.5324 | 0.16774 | -3.1738 | 0.0015   | 0.00786  | 808.831 | 588.371 | 786.824 | 517.321 | 466.763 | 525.825 | Down |
| Txlna    | 5276.3  | 0.23309 | 0.08235 | 2.83053 | 0.00465  | 0.0204   | 4941.03 | 4625.51 | 4986.4  | 5555.76 | 5831.37 | 5717.71 | Up   |
| E330017L | 29.5904 | -3.7268 | 0.78808 | -4.7289 | 2.26E-06 | 2.57E-05 | 31.9275 | 102.534 | 30.5563 | 5.18358 | 6.33615 | 1.0054  | Down |
| Gm12963  | 178.498 | -0.5835 | 0.18244 | -3.1984 | 0.00138  | 0.00732  | 209.948 | 205.067 | 227.262 | 145.14  | 147.844 | 135.729 | Down |
| Pef1     | 4757.86 | 0.33468 | 0.10386 | 3.22246 | 0.00127  | 0.00683  | 4150.58 | 4054.39 | 4420.15 | 5665.65 | 5437.47 | 4818.89 | Up   |
| Tinagl1  | 7563.01 | -0.3778 | 0.15726 | -2.402  | 0.0163   | 0.05676  | 8736.54 | 7473.46 | 9432.33 | 7055.89 | 7355.22 | 5324.6  | Down |
| Serinc2  | 2254.78 | 1.20718 | 0.1918  | 6.29387 | 3.10E-10 | 7.52E-09 | 1488.98 | 1453.68 | 1145.86 | 3495.81 | 3594.71 | 2349.62 | Up   |
| Fabp3    | 2234.91 | -3.1855 | 0.5824  | -5.4696 | 4.51E-08 | 7.21E-07 | 2709    | 7406.38 | 1966.1  | 403.282 | 434.026 | 490.636 | Down |
| Sdc3     | 1567.69 | 0.42537 | 0.18744 | 2.26935 | 0.02325  | 0.07523  | 1600.25 | 978.382 | 1436.14 | 1699.18 | 1789.96 | 1902.22 | Up   |
| Laptn5   | 9613.63 | 1.49353 | 0.25547 | 5.84625 | 5.03E-09 | 9.74E-08 | 6687.37 | 5027.98 | 3401.29 | 14061   | 17953.5 | 10550.7 | Up   |
| Ptpru    | 3703.27 | -0.978  | 0.13332 | -7.3361 | 2.20E-13 | 8.80E-12 | 5023.27 | 4822.92 | 4891.87 | 2694.42 | 2064.53 | 2722.63 | Down |
| Epb41    | 8276.91 | -0.3662 | 0.09494 | -3.8573 | 0.00011  | 0.00086  | 9068.39 | 9955.35 | 8941.52 | 7687.25 | 6977.16 | 7031.77 | Down |
| Gm37711  | 30.6495 | -3.0599 | 0.63581 | -4.8126 | 1.49E-06 | 1.77E-05 | 52.2451 | 53.6625 | 58.2479 | 1.03672 | 12.6723 | 6.03241 | Down |
| Oprd1    | 12.4261 | -2.3554 | 1.05904 | -2.2241 | 0.02614  | 0.08253  | 25.155  | 9.58259 | 27.6916 | 2.07343 | 0       | 10.054  | Down |
| Ythdf2   | 2727.68 | 0.38581 | 0.09525 | 4.05068 | 5.11E-05 | 0.00042  | 2458.42 | 2187.7  | 2449.27 | 3019.95 | 3106.83 | 3143.89 | Up   |
| Gm28874  | 24.1008 | 1.56587 | 0.5372  | 2.91486 | 0.00356  | 0.01629  | 17.415  | 6.70781 | 12.4135 | 34.2116 | 30.6247 | 43.2322 | Up   |
| Snhg12   | 415.628 | -0.5388 | 0.20201 | -2.6672 | 0.00765  | 0.03066  | 543.736 | 368.93  | 564.336 | 330.712 | 364.329 | 321.728 | Down |
| Med18    | 267.09  | -0.3539 | 0.16208 | -2.1837 | 0.02899  | 0.08959  | 327.015 | 280.77  | 291.239 | 241.555 | 240.774 | 221.188 | Down |
| Sesn2    | 1563.37 | 0.79773 | 0.15844 | 5.03493 | 4.78E-07 | 6.32E-06 | 1354.5  | 1053.13 | 1017.91 | 2254.86 | 1866    | 1833.85 | Up   |
| Ptafr    | 380.405 | 0.83854 | 0.27489 | 3.0505  | 0.00228  | 0.01115  | 403.448 | 223.274 | 191.931 | 489.33  | 486.828 | 487.619 | Up   |
| Rpa2     | 760.489 | -0.3376 | 0.11613 | -2.9068 | 0.00365  | 0.01664  | 851.401 | 820.269 | 875.628 | 703.93  | 621.999 | 689.705 | Down |
| Themis2  | 1343.65 | 0.92987 | 0.24725 | 3.76083 | 0.00017  | 0.00121  | 1220.99 | 954.426 | 599.666 | 1659.78 | 2087.76 | 1539.27 | Up   |
| Stx12    | 8683.99 | 0.3704  | 0.09503 | 3.89777 | 9.71E-05 | 0.00074  | 7660.68 | 7261.68 | 7803.3  | 9679.82 | 10541.2 | 9157.19 | Up   |
| Fgr      | 1452.95 | 1.67328 | 0.24506 | 6.82814 | 8.60E-12 | 2.72E-10 | 824.311 | 803.021 | 453.569 | 1955.25 | 2756.23 | 1925.34 | Up   |
| Ahdcd1   | 976.67  | -0.2995 | 0.09823 | -3.0488 | 0.0023   | 0.01119  | 1089.41 | 1070.37 | 1073.29 | 898.833 | 856.437 | 871.683 | Down |
| Cd164l2  | 200.469 | 2.18398 | 0.23148 | 9.43496 | 3.91E-21 | 3.77E-19 | 72.5626 | 73.7859 | 70.6613 | 288.207 | 290.407 | 407.187 | Up   |
| Map3k6   | 3024.11 | -1.4023 | 0.17954 | -7.8102 | 5.71E-15 | 2.89E-13 | 3751    | 4854.54 | 4558.61 | 2080.69 | 1430.91 | 1468.89 | Down |
| Tmem222  | 2282.82 | -0.2077 | 0.0933  | -2.2259 | 0.02602  | 0.08219  | 2394.57 | 2553.76 | 2391.98 | 2133.56 | 2209.21 | 2013.82 | Down |
| Wdtdc1   | 2212.47 | -0.2712 | 0.09324 | -2.9085 | 0.00363  | 0.01657  | 2400.37 | 2346.78 | 2512.3  | 1899.26 | 2033.9  | 2082.19 | Down |
| Slc9a1   | 2828.5  | 0.4222  | 0.10044 | 4.20351 | 2.63E-05 | 0.00023  | 2391.66 | 2376.48 | 2484.61 | 2962.93 | 3314.86 | 3440.48 | Up   |
| Tent5b   | 835.256 | -0.5449 | 0.21227 | -2.5669 | 0.01026  | 0.03904  | 1042    | 984.132 | 947.244 | 919.567 | 557.581 | 561.014 | Down |
| Nudc     | 6064.42 | -0.4317 | 0.0897  | -4.8128 | 1.49E-06 | 1.77E-05 | 6702.85 | 7070.99 | 7121.52 | 5383.67 | 4828.15 | 5279.36 | Down |
| Nr0b2    | 8.82205 | -4.6241 | 1.77039 | -2.6119 | 0.009    | 0.035    | 8.70751 | 42.1634 | 0       | 0       | 1.05603 | 1.0054  | Down |
| Rps6ka1  | 4462.36 | 0.38679 | 0.13811 | 2.8006  | 0.0051   | 0.02208  | 4425.35 | 3763.08 | 3414.66 | 5272.74 | 5414.24 | 4484.09 | Up   |
| Crybg2   | 281.902 | -0.8938 | 0.24628 | -3.6294 | 0.00028  | 0.00189  | 399.578 | 368.93  | 331.344 | 182.462 | 144.675 | 264.42  | Down |
| Sh3bgrl3 | 4010.9  | 0.52021 | 0.16663 | 3.12198 | 0.0018   | 0.00911  | 3654.25 | 3130.63 | 3101.46 | 4852.87 | 5602.21 | 3724    | Up   |
| Cep85    | 10371.7 | 2.52985 | 0.84756 | 2.98485 | 0.00284  | 0.01342  | 4705.93 | 3745.83 | 733.35  | 11041   | 33143.4 | 8860.6  | Up   |
| Cnksr1   | 1474.87 | 0.28972 | 0.09633 | 3.00746 | 0.00263  | 0.01259  | 1311.93 | 1337.73 | 1332.06 | 1709.54 | 1614.66 | 1543.29 | Up   |
| Pdik1l   | 1100.9  | 0.31614 | 0.14758 | 2.14222 | 0.03218  | 0.09663  | 1110.69 | 909.387 | 922.417 | 1135.2  | 1135.23 | 1392.48 | Up   |
| Trim63   | 160.026 | -5.6873 | 1.2326  | -4.6141 | 3.95E-06 | 4.28E-05 | 147.06  | 657.365 | 137.503 | 1.03672 | 2.11205 | 15.081  | Down |
| Slc30a2  | 33.4583 | -1.4516 | 0.41219 | -3.5218 | 0.00043  | 0.00271  | 55.1476 | 46.9547 | 44.8795 | 20.7343 | 17.9524 | 15.081  | Down |
| Extl1    | 178.619 | -1.4641 | 0.20939 | -6.9924 | 2.70E-12 | 9.04E-11 | 267.03  | 290.352 | 229.172 | 104.708 | 93.9863 | 86.4645 | Down |
| Pafah2   | 2135.75 | 0.407   | 0.10507 | 3.87354 | 0.00011  | 0.00081  | 1709.58 | 1939.52 | 1860.11 | 2474.64 | 2552.41 | 2278.24 | Up   |
| Ldlrap1  | 2245.26 | -0.2174 | 0.08779 | -2.4767 | 0.01326  | 0.04812  | 2391.66 | 2365.94 | 2484.61 | 2102.46 | 2133.17 | 1993.71 | Down |
| Rsrp1    | 32007   | -0.3749 | 0.09347 | -4.011  | 6.05E-05 | 0.00049  | 36987.6 | 33560.1 | 37880.  |         |         |         |      |

|           |         |         |         |         |          |          |         |         |         |         |         |         |      |
|-----------|---------|---------|---------|---------|----------|----------|---------|---------|---------|---------|---------|---------|------|
| Myom3     | 442.343 | 0.77045 | 0.188   | 4.0981  | 4.17E-05 | 0.00035  | 352.171 | 368.93  | 259.728 | 553.606 | 620.943 | 498.679 | Up   |
| Pnrc2     | 7759.13 | 0.32295 | 0.12312 | 2.62296 | 0.00872  | 0.03411  | 7292.06 | 7136.15 | 6254.48 | 9162.49 | 9161.02 | 7548.55 | Up   |
| Cnr2      | 573.281 | 0.6258  | 0.17419 | 3.59256 | 0.00033  | 0.00214  | 521.483 | 364.138 | 466.938 | 651.058 | 762.45  | 673.619 | Up   |
| Fuca1     | 10633.3 | 1.48018 | 0.13025 | 11.3638 | 6.33E-30 | 1.25E-27 | 6063.33 | 5950.79 | 4820.25 | 16227.7 | 16641.9 | 14095.7 | Up   |
| Hmgcl     | 2676.5  | 0.27027 | 0.11003 | 2.45642 | 0.01403  | 0.05037  | 2703.2  | 2347.73 | 2228.7  | 2969.15 | 2936.81 | 2873.44 | Up   |
| Gale      | 1278.46 | 0.95917 | 0.17886 | 5.36267 | 8.20E-08 | 1.24E-06 | 692.731 | 1060.79 | 851.756 | 1815.29 | 1756.17 | 1494.03 | Up   |
| Eloa      | 293.448 | 0.57907 | 0.19814 | 2.92245 | 0.00347  | 0.01597  | 274.77  | 205.067 | 226.307 | 342.116 | 306.247 | 406.182 | Up   |
| Id3       | 9267.17 | -0.3872 | 0.18901 | -2.0487 | 0.04049  | 0.11562  | 9531.82 | 11551.8 | 10426.4 | 9271.35 | 9061.75 | 5759.94 | Down |
| Asap3     | 1027.02 | 0.45095 | 0.11619 | 3.88131 | 0.0001   | 0.00079  | 827.214 | 837.518 | 938.65  | 1260.65 | 1126.78 | 1171.29 | Up   |
| Ephb2     | 221.37  | -0.7803 | 0.30191 | -2.5844 | 0.00975  | 0.03742  | 216.72  | 354.556 | 268.322 | 153.434 | 112.995 | 222.194 | Down |
| C1qb      | 3078.84 | 1.0509  | 0.20744 | 5.06601 | 4.06E-07 | 5.45E-06 | 2143.98 | 2365.94 | 1503.94 | 3817.19 | 3493.33 | 5148.66 | Up   |
| C1qc      | 2532.42 | 0.93418 | 0.22821 | 4.09355 | 4.25E-05 | 0.00035  | 1906.95 | 2106.25 | 1206.97 | 3155.76 | 2725.6  | 4092.99 | Up   |
| C1qa      | 2766.61 | 0.89713 | 0.21898 | 4.09693 | 4.19E-05 | 0.00035  | 2226.22 | 2179.08 | 1394.13 | 3267.73 | 3020.23 | 4512.24 | Up   |
| Zbtb40    | 879.763 | -0.3188 | 0.12504 | -2.5496 | 0.01078  | 0.04072  | 915.256 | 952.509 | 1061.83 | 735.032 | 844.82  | 769.132 | Down |
| Wnt4      | 1552.92 | -0.8443 | 0.20216 | -4.1763 | 2.96E-05 | 0.00026  | 1754.08 | 2006.59 | 2223.92 | 990.064 | 886.005 | 1456.83 | Down |
| 2810405F  | 53.1627 | -1.2041 | 0.41174 | -2.9244 | 0.00345  | 0.01587  | 56.1151 | 72.8277 | 93.5785 | 25.9179 | 24.2886 | 46.2484 | Down |
| Rap1gap   | 4670.43 | 1.19024 | 0.12966 | 9.17996 | 4.31E-20 | 3.80E-18 | 3315.63 | 2637.13 | 2585.82 | 6878.61 | 6368.89 | 6236.5  | Up   |
| Alpl      | 733.469 | 0.58695 | 0.22328 | 2.62878 | 0.00857  | 0.03365  | 427.636 | 580.705 | 750.538 | 956.889 | 733.938 | 951.109 | Up   |
| Ddost     | 10228.2 | 0.30288 | 0.08934 | 3.39034 | 0.0007   | 0.00412  | 9353.8  | 8866.77 | 9254.72 | 11982.4 | 11342.8 | 10568.8 | Up   |
| Pink1     | 7183.12 | -0.5415 | 0.12401 | -4.3666 | 1.26E-05 | 0.00012  | 8412.43 | 9337.27 | 7796.62 | 6122.84 | 6273.85 | 5155.7  | Down |
| Mul1      | 1485.76 | -0.234  | 0.09185 | -2.5479 | 0.01084  | 0.04087  | 1673.78 | 1573.46 | 1570.78 | 1361.21 | 1377.06 | 1358.3  | Down |
| Camk2n1   | 3948.57 | -0.3395 | 0.08608 | -3.9447 | 7.99E-05 | 0.00062  | 4442.77 | 4511.48 | 4278.83 | 3564.23 | 3588.37 | 3305.76 | Down |
| Pla2g5    | 119.094 | 2.02465 | 0.67575 | 2.99614 | 0.00273  | 0.01299  | 15.48   | 112.116 | 13.3684 | 227.041 | 140.451 | 206.107 | Up   |
| Gm13030   | 102.353 | 5.97509 | 0.59851 | 9.98332 | 1.80E-23 | 2.11E-21 | 5.80501 | 3.83303 | 0       | 242.592 | 124.611 | 237.275 | Up   |
| Otud3     | 449.058 | 0.59524 | 0.19368 | 3.07332 | 0.00212  | 0.01044  | 337.658 | 376.596 | 359.036 | 484.146 | 457.259 | 679.651 | Up   |
| Tmco4     | 1085.67 | 0.46729 | 0.12967 | 3.60373 | 0.00031  | 0.00207  | 1037.16 | 879.681 | 817.38  | 1269.98 | 1223.93 | 1285.91 | Up   |
| Pqlc2     | 859.187 | 0.43824 | 0.13334 | 3.28671 | 0.00101  | 0.00565  | 776.904 | 768.523 | 643.591 | 942.375 | 1066.59 | 957.142 | Up   |
| 4933427I2 | 8.07422 | -2.2923 | 0.95363 | -2.4037 | 0.01623  | 0.05657  | 6.77251 | 18.2069 | 15.2781 | 3.11015 | 1.05603 | 4.0216  | Down |
| Arhgef10I | 1405.69 | 0.51124 | 0.19525 | 2.6184  | 0.00883  | 0.03449  | 1051.67 | 1469.01 | 956.793 | 1704.36 | 1862.83 | 1389.46 | Up   |
| Sdhb      | 5194.6  | -0.616  | 0.18624 | -3.3078 | 0.00094  | 0.0053   | 5353.19 | 8219.94 | 5288.14 | 4395.68 | 4155.46 | 3755.17 | Down |
| Mfap2     | 2056.83 | -0.9744 | 0.18742 | -5.1991 | 2.00E-07 | 2.84E-06 | 2613.22 | 2245.2  | 3320.13 | 1666    | 1216.54 | 1279.88 | Down |
| Crocc     | 726.622 | -0.4247 | 0.18569 | -2.287  | 0.02219  | 0.07239  | 796.254 | 737.859 | 964.432 | 691.489 | 491.052 | 678.646 | Down |
| Necap2    | 4660.49 | 0.24893 | 0.08349 | 2.98168 | 0.00287  | 0.01352  | 4381.81 | 4132.01 | 4264.51 | 5259.26 | 4866.16 | 5059.18 | Up   |
| Cplane2   | 176.485 | -0.7983 | 0.34365 | -2.323  | 0.02018  | 0.06722  | 267.03  | 163.862 | 241.585 | 114.039 | 82.37   | 190.021 | Down |
| Arhgef19  | 955.073 | -0.4192 | 0.17881 | -2.3445 | 0.01905  | 0.06426  | 1092.31 | 1027.25 | 1159.23 | 930.971 | 618.831 | 901.845 | Down |
| Gm13074   | 93.1541 | 4.01286 | 0.53969 | 7.43542 | 1.04E-13 | 4.40E-12 | 6.77251 | 11.4991 | 14.3232 | 207.343 | 68.6416 | 250.345 | Up   |
| Hspb7     | 1904.86 | -3.2179 | 0.57129 | -5.6328 | 1.77E-08 | 3.06E-07 | 2331.68 | 6171.19 | 1817.14 | 418.833 | 411.85  | 278.496 | Down |
| B330016D  | 189.371 | -1.0177 | 0.25902 | -3.9289 | 8.53E-05 | 0.00066  | 182.858 | 269.271 | 308.427 | 106.782 | 135.171 | 133.718 | Down |
| Tmem82    | 162.524 | 0.49792 | 0.23433 | 2.12486 | 0.0336   | 0.09998  | 143.19  | 110.2   | 150.871 | 224.967 | 168.964 | 176.951 | Up   |
| Slc25a34  | 131.397 | -1.5896 | 0.37453 | -4.2443 | 2.19E-05 | 0.0002   | 204.143 | 274.062 | 113.631 | 75.6803 | 46.4651 | 74.3997 | Down |
| Plekhn2   | 2992.47 | 0.41508 | 0.10949 | 3.79092 | 0.00015  | 0.00108  | 2535.82 | 2562.38 | 2596.33 | 3310.23 | 3811.2  | 3138.86 | Up   |
| Dnajc16   | 1941.86 | 0.28726 | 0.11086 | 2.5911  | 0.00957  | 0.03684  | 1771.5  | 1747.86 | 1728.34 | 1938.66 | 2114.16 | 2350.63 | Up   |
| Casp9     | 875.744 | 0.72357 | 0.2038  | 3.55031 | 0.00038  | 0.00247  | 853.336 | 509.794 | 618.764 | 1001.47 | 1214.43 | 1056.68 | Up   |
| Effhd2    | 6789.82 | 0.59746 | 0.11673 | 5.11824 | 3.08E-07 | 4.23E-06 | 5790.5  | 5603.9  | 4816.43 | 8145.48 | 8820.98 | 7561.62 | Up   |
| Fhad1os2  | 859.516 | -0.7074 | 0.2033  | -3.4793 | 0.0005   | 0.00312  | 890.101 | 1187.28 | 1121.03 | 786.867 | 493.164 | 678.646 | Down |
| Tmem51    | 1223.07 | 0.70325 | 0.15934 | 4.41351 | 1.02E-05 | 9.94E-05 | 809.799 | 1058.88 | 923.372 | 1438.96 | 1756.17 | 1351.26 | Up   |
| Kazn      | 2651.45 | 0.36813 | 0.12674 | 2.90461 | 0.00368  | 0.01673  | 2399.4  | 2530.76 | 2014.8  | 2775.29 | 3192.36 | 2996.09 | Up   |
| Pdpn      | 5787.24 | 0.52759 | 0.17116 | 3.08236 | 0.00205  | 0.01018  | 5603.77 | 3693.13 | 4925.29 | 7416.67 | 6004.56 | 7080.03 | Up   |
| Pramef12  | 65.1106 | -1.1691 | 0.5952  | -1.9642 | 0.0495   | 0.13575  | 64.8226 | 91.9928 | 113.631 | 70.4967 | 9.50423 | 40.216  | Down |
| AAdacl4fn | 3.51249 | -5.2091 | 2.46213 | -2.1157 | 0.03437  | 0.10179  | 0       | 19.1652 | 1.90977 | 0       | 0       | 0       | Down |
| Tnfrsf1b  | 2882.84 | 0.88856 | 0.11912 | 7.4596  | 8.68E-14 | 3.71E-12 | 2221.38 | 2058.34 | 1786.59 | 3615.03 | 3980.16 | 3635.53 | Up   |
| Tnfrsf8   | 106.654 | 1.47006 | 0.34257 | 4.29128 | 1.78E-05 | 0.00016  | 37.7326 | 63.2451 | 68.7516 | 182.462 | 108.771 | 178.961 | Up   |
| Gm13230   | 8.20678 | 2.91435 | 1.07771 | 2.70421 | 0.00685  | 0.02803  | 1.935   | 3.83303 | 0       | 22.8077 | 11.6163 | 9.04861 | Up   |
| Znf41-ps  | 133.637 | 1.08792 | 0.2811  | 3.87019 | 0.00011  | 0.00082  | 107.393 | 76.6607 | 72.5711 | 158.618 | 157.348 | 229.231 | Up   |
| Zfp992    | 212.062 | 1.01321 | 0.48615 | 2.08416 | 0.03715  | 0.10823  | 110.295 | 248.189 | 63.0223 | 176.242 | 440.363 | 234.258 | Up   |
| Gm13245   | 12.9533 | 1.42213 | 0.70421 | 2.01949 | 0.04344  | 0.12227  | 8.70751 | 2.87478 | 9.54883 | 17.6242 | 15.8404 | 23.1242 | Up   |
| Zfp981    | 39.8518 | 2.2994  | 0.75872 | 3.03065 | 0.00244  | 0.0118   | 13.545  | 22.0399 | 4.77441 | 44.5788 | 133.059 | 21.1134 | Up   |
| Zfp991    | 306.687 | 1.55709 | 0.20596 | 7.56035 | 4.02E-14 | 1.82E-12 | 173.183 | 134.156 | 159.465 | 513.174 | 367.497 | 492.646 | Up   |
| Mfn2      | 4184.85 | -0.5206 | 0.15776 | -3.2996 | 0.00097  | 0.00543  | 4373.11 | 6130.94 | 4291.24 | 3480.26 | 3331.76 | 3501.81 | Down |
| 2510039C  | 4621.61 | 0.25252 | 0.10409 | 2.42589 | 0.01527  | 0.05381  | 4182.51 | 4345.7  | 4126.05 | 5121.38 | 5422.69 | 4531.34 | Up   |
| Nppa      | 1009.54 | -9.9469 | 1.73783 | -5.7238 | 1.04E-08 | 1.87E-07 | 295.088 | 5691.1  | 64.932  | 1.03672 | 1.05603 | 4.0216  | Down |
| Agtrap    | 3488.37 | 0.40151 | 0.12244 | 3.27912 | 0.00104  | 0.00576  | 3206.3  | 2586.34 | 3225.59 | 4157.23 | 3818.59 | 3936.14 | Up   |
| Fbxo6     | 2527.13 | 0.39327 | 0.13472 | 2.91921 | 0.00351  | 0.0161   | 2326.84 | 2205.91 | 2021.49 | 2974.34 | 3187.08 | 2447.15 | Up   |
| Fbxo44    | 629.976 | 0.49748 | 0.20417 | 2.43661 | 0.01483  | 0.05258  | 655.966 | 398.636 | 512.772 | 784.794 | 650.512 | 777.175 | Up   |
| Masp2     | 135.962 | -1.1187 | 0.24433 | -4.5786 | 4.68E-06 | 4.98E-05 | 167.378 | 162.904 | 228.217 | 90.1943 | 87.6501 | 79.4267 | Down |
| Cort      | 36.1333 | -1.2524 | 0.48264 | -2.5949 | 0.00946  | 0.0365   | 58.0501 | 27.7895 | 66.8418 | 23.8445 | 22.1765 | 18.0972 | Down |
| Pgd       | 11291.3 | 0.65925 | 0.15298 | 4.30931 | 1.64E-05 | 0.00015  | 10788.6 | 7874.97 | 7602.78 | 13209.8 | 14523.5 | 13747.9 | Up   |
| Kif1b     | 7397.24 | -0.3066 | 0.08228 | -3.7263 | 0.00019  | 0.00136  | 7972.21 | 8549.58 | 8019.11 | 6366.47 | 6725.83 | 6750.26 | Down |
| Rbp7      | 32.3297 | -3.6195 | 0.96458 | -3.7525 | 0.00018  | 0.00125  | 21.285  | 139.906 | 18.1428 | 2.07343 | 10.5603 | 2.0108  | Down |
| Ctnnbip1  | 385.381 | 0.52014 | 0.14998 | 3.46812 | 0.00052  | 0.00323  | 338.626 | 306.643 | 304.608 | 438.531 | 501.612 | 422.268 | Up   |
| C1stn1    | 14124.3 | 0.2456  | 0.11921 | 2.06016 | 0.03938  | 0.11315  | 14919.8 | 11750.2 | 12105.1 | 15258.4 | 15489.8 | 15222.8 | Up   |
| Pik3cd    | 1756.61 | 0.50807 | 0.10033 | 5.0641  | 4.10E-07 | 5.50E-06 | 1503.5  | 1440.26 | 1407.5  | 1989.46 | 2210.26 | 1988.68 | Up   |
| Tmem201   | 1213.54 | -0.5065 | 0.116   | -4.3662 | 1.26E-05 | 0.00012  | 1280.97 | 1509.26 | 1482.93 | 965.182 | 1026.46 | 1016.46 | Down |
| Slc25a33  | 541.49  | -0.4086 | 0.18262 | -2.2372 | 0.02527  | 0.0804   | 600.818 | 684.197 | 568.155 | 489.33  | 368.553 | 537.889 | Down |
| Gm16188   | 233.692 | -1.0359 | 0.29012 | -3.5707 | 0.00036  | 0.00231  | 383.131 | 259.688 | 299.833 | 181.425 | 96.0983 | 181.978 | Down |
| Spsb1     | 1593.97 | -0.6012 | 0.1316  | -4.5684 | 4.91E-06 | 5.20E-05 | 1968.87 | 1872.44 | 1923.13 | 1235.77 | 1107.77 | 1455.82 | Down |
| H6pd      | 10496.5 | 0.33826 | 0.11593 | 2.91786 | 0.00352  |          |         |         |         |         |         |         |      |

|           |         |         |         |         |          |          |         |         |         |         |         |         |      |
|-----------|---------|---------|---------|---------|----------|----------|---------|---------|---------|---------|---------|---------|------|
| Tnfrsf25  | 405.215 | -0.6535 | 0.1954  | -3.3446 | 0.00082  | 0.00473  | 423.766 | 545.249 | 517.547 | 306.868 | 260.838 | 377.025 | Down |
| Espn      | 606.912 | -0.6885 | 0.12007 | -5.7343 | 9.79E-09 | 1.78E-07 | 771.099 | 776.19  | 699.929 | 461.339 | 459.371 | 473.544 | Down |
| Hes2      | 105.184 | -2.5866 | 0.44251 | -5.8454 | 5.05E-09 | 9.79E-08 | 300.893 | 117.866 | 122.225 | 29.028  | 36.9609 | 24.1296 | Down |
| Acot7     | 8256.26 | 1.00889 | 0.15718 | 6.41888 | 1.37E-10 | 3.57E-09 | 6783.15 | 4926.41 | 4735.26 | 10475   | 11791.6 | 10826.2 | Up   |
| Rnf207    | 129.585 | -3.5911 | 0.55644 | -6.4538 | 1.09E-10 | 2.88E-09 | 170.28  | 436.008 | 111.721 | 25.9179 | 8.4482  | 25.135  | Down |
| Chd5      | 135.284 | 1.07318 | 0.30497 | 3.51892 | 0.00043  | 0.00274  | 109.328 | 90.0763 | 62.0674 | 173.132 | 232.326 | 144.778 | Up   |
| Kcnab2    | 570.025 | 0.68529 | 0.1609  | 4.25905 | 2.05E-05 | 0.00019  | 504.068 | 437.924 | 369.54  | 686.306 | 664.24  | 758.072 | Up   |
| Nphp4     | 609.49  | -0.5715 | 0.22698 | -2.5179 | 0.01181  | 0.04378  | 589.208 | 915.137 | 681.786 | 441.641 | 411.85  | 617.316 | Down |
| Ajap1     | 24.4624 | 1.31105 | 0.59897 | 2.18885 | 0.02861  | 0.08868  | 7.74001 | 16.2904 | 18.1428 | 39.3952 | 17.9524 | 47.2538 | Up   |
| A430005L  | 941.394 | -0.2584 | 0.11276 | -2.2917 | 0.02192  | 0.0717   | 1055.54 | 978.382 | 1042.73 | 842.85  | 808.915 | 919.942 | Down |
| Dffb      | 593.794 | -0.4035 | 0.15676 | -2.5744 | 0.01004  | 0.03834  | 752.716 | 711.028 | 565.291 | 515.248 | 482.604 | 535.879 | Down |
| Trp73     | 1203.09 | -0.7032 | 0.26192 | -2.6848 | 0.00726  | 0.02937  | 1234.53 | 1759.36 | 1478.16 | 1041.9  | 554.413 | 1150.18 | Down |
| Arhgef16  | 1794.52 | 0.61178 | 0.09986 | 6.12636 | 8.99E-10 | 2.00E-08 | 1388.36 | 1406.72 | 1463.84 | 2318.1  | 2046.58 | 2143.51 | Up   |
| Prdm16os  | 293.568 | -0.9407 | 0.28367 | -3.3161 | 0.00091  | 0.00516  | 424.733 | 328.683 | 404.87  | 165.875 | 144.675 | 292.572 | Down |
| Gm27202   | 75.9813 | -1.7181 | 0.34046 | -5.0463 | 4.50E-07 | 6.00E-06 | 131.58  | 99.6589 | 118.405 | 48.7256 | 25.3446 | 32.1728 | Down |
| Gm13110   | 165.25  | -0.9083 | 0.25077 | -3.6221 | 0.00029  | 0.00194  | 185.76  | 197.401 | 263.548 | 113.002 | 137.283 | 94.5077 | Down |
| Pxrl2b    | 350.079 | -0.6209 | 0.16078 | -3.8617 | 0.00011  | 0.00084  | 480.848 | 390.97  | 401.051 | 290.28  | 260.838 | 276.485 | Down |
| Pank4     | 1897.75 | -0.3007 | 0.10627 | -2.8298 | 0.00466  | 0.02044  | 1990.15 | 2164.71 | 2129.39 | 1810.11 | 1729.77 | 1562.39 | Down |
| Morn1     | 1107.29 | -0.4697 | 0.16479 | -2.8503 | 0.00437  | 0.01935  | 1267.43 | 1392.35 | 1198.38 | 976.586 | 740.274 | 1068.74 | Down |
| Faap20    | 1586.72 | -0.2233 | 0.11181 | -1.9972 | 0.0458   | 0.12733  | 1553.81 | 1818.77 | 1755.07 | 1531.23 | 1468.93 | 1392.48 | Down |
| Cfap74    | 2120.07 | -0.7465 | 0.2081  | -3.5873 | 0.00033  | 0.00218  | 2323.94 | 2988.81 | 2657.44 | 1767.6  | 1103.55 | 1879.09 | Down |
| Tmem52    | 87.2048 | -1.0097 | 0.26061 | -3.8744 | 0.00011  | 0.0008   | 119.97  | 114.991 | 114.586 | 50.7991 | 67.5856 | 55.297  | Down |
| Nadk      | 10309.8 | 0.43352 | 0.08506 | 5.0966  | 3.46E-07 | 4.70E-06 | 9158.37 | 8543.83 | 8614.95 | 11300.2 | 12384   | 11857.7 | Up   |
| Cdk11b    | 3417.7  | -0.3611 | 0.09762 | -3.6987 | 0.00022  | 0.00149  | 3539.12 | 3974.86 | 4015.28 | 2943.24 | 3109.99 | 2923.71 | Down |
| Mmp23     | 1104.92 | 0.55082 | 0.20575 | 2.67716 | 0.00742  | 0.02991  | 924.931 | 828.894 | 935.785 | 1707.47 | 974.711 | 1257.76 | Up   |
| Mib2      | 2560.46 | -0.2081 | 0.10381 | -2.0048 | 0.04499  | 0.12561  | 2861.87 | 2562.38 | 2810.22 | 2549.28 | 2252.5  | 2326.5  | Down |
| Fndc10    | 331.525 | 0.44001 | 0.1535  | 2.86648 | 0.00415  | 0.01855  | 284.445 | 286.519 | 273.097 | 425.053 | 360.105 | 359.934 | Up   |
| Ssu72     | 3540.01 | 0.25913 | 0.08632 | 3.00194 | 0.00268  | 0.01278  | 3256.61 | 3247.54 | 3164.48 | 3959.22 | 3970.66 | 3641.56 | Up   |
| Tmem240   | 60.1589 | -1.1351 | 0.39108 | -2.9023 | 0.0037   | 0.01683  | 102.555 | 73.7859 | 71.6162 | 50.7991 | 39.0729 | 23.1242 | Down |
| Atad3a    | 1742.39 | -0.2531 | 0.11913 | -2.1243 | 0.03365  | 0.10008  | 1722.15 | 1979.76 | 1982.34 | 1487.69 | 1736.11 | 1546.31 | Down |
| Vwa1      | 670.618 | 0.29368 | 0.14962 | 1.9628  | 0.04967  | 0.1361   | 574.696 | 587.413 | 645.501 | 675.939 | 857.493 | 682.667 | Up   |
| Tmem88b   | 92.1917 | -0.8432 | 0.25173 | -3.3497 | 0.00081  | 0.00466  | 118.035 | 109.241 | 127.954 | 69.46   | 58.0814 | 70.3781 | Down |
| Ankrd65   | 1339.43 | -0.5357 | 0.24818 | -2.1586 | 0.03088  | 0.09373  | 1282.91 | 1979.76 | 1493.44 | 1161.12 | 733.938 | 1385.44 | Down |
| Mxra8     | 18782.5 | -0.5803 | 0.09101 | -6.3759 | 1.82E-10 | 4.63E-09 | 21292.8 | 24263.1 | 21972.8 | 14974.3 | 15532   | 14659.8 | Down |
| Cptp      | 1102.37 | 0.77557 | 0.09835 | 7.88606 | 3.12E-15 | 1.62E-13 | 810.766 | 836.56  | 791.598 | 1412.01 | 1414.02 | 1349.25 | Up   |
| Acap3     | 1672.76 | 0.25671 | 0.11427 | 2.2466  | 0.02467  | 0.07879  | 1577.03 | 1441.22 | 1554.55 | 1931.4  | 1895.57 | 1636.79 | Up   |
| C1qtnf12  | 731.394 | -0.307  | 0.14385 | -2.1345 | 0.0328   | 0.09807  | 922.996 | 766.607 | 737.17  | 701.857 | 649.456 | 610.278 | Down |
| Gm37090   | 533.378 | -0.319  | 0.1462  | -2.182  | 0.02911  | 0.08986  | 514.711 | 602.745 | 658.869 | 470.669 | 464.651 | 488.625 | Down |
| Rnf223    | 16.8024 | -1.386  | 0.58163 | -2.383  | 0.01717  | 0.05912  | 17.415  | 28.7478 | 26.7367 | 10.3672 | 9.50423 | 8.04321 | Down |
| Agrr      | 14771.9 | 0.53013 | 0.0977  | 5.42592 | 5.77E-08 | 9.01E-07 | 12473   | 11387   | 12403.9 | 17914.4 | 18397   | 16056.3 | Up   |
| Isg15     | 608.679 | 0.94614 | 0.18397 | 5.1428  | 2.71E-07 | 3.75E-06 | 480.848 | 373.721 | 393.412 | 879.135 | 645.231 | 879.726 | Up   |
| AW01173i  | 450.953 | -0.462  | 0.16203 | -2.8514 | 0.00435  | 0.0193   | 497.296 | 477.213 | 592.982 | 361.814 | 424.522 | 351.89  | Down |
| Perm1     | 489.898 | -1.5513 | 0.3797  | -4.0858 | 4.39E-05 | 0.00036  | 471.173 | 1288.86 | 431.607 | 214.6   | 257.67  | 275.48  | Down |
| Pex1      | 427.482 | 0.28945 | 0.13933 | 2.07736 | 0.03777  | 0.10963  | 406.351 | 367.971 | 380.043 | 450.971 | 448.811 | 510.744 | Up   |
| Mterf1a   | 273.194 | -0.5113 | 0.15922 | -3.2113 | 0.00132  | 0.00706  | 331.853 | 321.017 | 310.337 | 217.71  | 247.11  | 211.134 | Down |
| Cyp51     | 4808.72 | 1.69422 | 0.14177 | 11.9508 | 6.43E-33 | 1.71E-30 | 2383.92 | 2571.97 | 1855.34 | 7146.08 | 7759.67 | 7135.33 | Up   |
| Mterf1b   | 176.284 | -0.5423 | 0.20401 | -2.6585 | 0.00785  | 0.0313   | 217.688 | 202.193 | 207.21  | 170.021 | 129.891 | 130.702 | Down |
| Fzd1      | 3184.85 | 0.47842 | 0.11157 | 4.28792 | 1.80E-05 | 0.00017  | 2788.34 | 2641.92 | 2554.31 | 3433.6  | 4123.78 | 3567.16 | Up   |
| Cldn12    | 2733.3  | 0.73916 | 0.09708 | 7.61382 | 2.66E-14 | 1.23E-12 | 2209.77 | 1982.64 | 1951.78 | 3311.27 | 3461.65 | 3482.71 | Up   |
| Steap2    | 2571.51 | 1.43978 | 0.15676 | 9.18472 | 4.13E-20 | 3.65E-18 | 1400.94 | 1612.75 | 1142.04 | 3382.8  | 3736.22 | 4154.32 | Up   |
| Steap1    | 356.477 | 1.37532 | 0.20206 | 6.80645 | 1.00E-11 | 3.13E-10 | 164.475 | 252.022 | 178.563 | 547.386 | 483.66  | 512.754 | Up   |
| Steap4    | 2244.42 | 1.40447 | 0.2735  | 5.13519 | 2.82E-07 | 3.90E-06 | 1127.14 | 1739.24 | 825.974 | 2770.1  | 2735.11 | 4268.93 | Up   |
| Dbf4      | 523.523 | 0.63519 | 0.13042 | 4.87048 | 1.11E-06 | 1.36E-05 | 436.343 | 411.093 | 382.908 | 674.902 | 613.551 | 622.343 | Up   |
| Slc25a40  | 888.164 | 0.2364  | 0.10139 | 2.33171 | 0.01972  | 0.06608  | 829.149 | 823.144 | 794.463 | 949.632 | 948.311 | 984.287 | Up   |
| Abcb4     | 59.0149 | -1.3878 | 0.52042 | -2.6667 | 0.00766  | 0.03068  | 54.1801 | 155.238 | 46.7893 | 33.1749 | 28.5127 | 36.1944 | Down |
| Crot      | 2958.34 | 0.49455 | 0.0975  | 5.07235 | 3.93E-07 | 5.29E-06 | 2533.89 | 2529.8  | 2305.09 | 3483.37 | 3268.4  | 3629.5  | Up   |
| Tmem243   | 7125.89 | 1.20553 | 0.11654 | 10.3447 | 4.42E-25 | 5.91E-23 | 4912.97 | 4037.14 | 3981.86 | 10082.1 | 9527.46 | 10213.9 | Up   |
| 9330182Li | 779.42  | 0.56448 | 0.17997 | 3.13645 | 0.00171  | 0.00873  | 792.384 | 543.333 | 550.967 | 907.126 | 893.397 | 989.314 | Up   |
| Sema3a    | 3486.26 | 0.3545  | 0.09981 | 3.55191 | 0.00038  | 0.00246  | 3329.17 | 2883.4  | 2967.78 | 4044.23 | 3789.02 | 3903.97 | Up   |
| Gm43719   | 904.978 | 0.25208 | 0.10929 | 2.30651 | 0.02108  | 0.06948  | 850.434 | 765.649 | 862.259 | 990.064 | 984.216 | 977.25  | Up   |
| Pclo      | 303.922 | -0.7898 | 0.30037 | -2.6293 | 0.00856  | 0.03361  | 240.908 | 454.215 | 460.254 | 216.674 | 168.964 | 282.518 | Down |
| Gm9758    | 15.2353 | 4.51007 | 0.96424 | 4.67733 | 2.91E-06 | 3.24E-05 | 1.935   | 1.91652 | 0       | 39.3952 | 19.0085 | 29.1566 | Up   |
| Speer4e   | 19.5008 | 3.33335 | 0.81285 | 4.10082 | 4.12E-05 | 0.00034  | 3.87001 | 4.79129 | 1.90977 | 43.5421 | 11.6163 | 51.2754 | Up   |
| Gm10354   | 45.8995 | 5.3234  | 1.61327 | 3.29976 | 0.00097  | 0.00543  | 0       | 6.70781 | 0       | 110.929 | 40.129  | 117.632 | Up   |
| Gm17019   | 5.96883 | 3.51766 | 1.21995 | 2.88344 | 0.00393  | 0.01772  | 0       | 1.91652 | 0.95488 | 10.3672 | 9.50423 | 13.0702 | Up   |
| Cacna2d1  | 2231.48 | -0.6457 | 0.11513 | -5.6089 | 2.04E-08 | 3.46E-07 | 2714.81 | 2922.69 | 2530.44 | 1631.79 | 1906.13 | 1683.04 | Down |
| Hgf       | 461.01  | 0.5715  | 0.20532 | 2.78348 | 0.00538  | 0.02301  | 443.116 | 322.933 | 346.622 | 434.384 | 617.775 | 601.23  | Up   |
| Cd36      | 70373.6 | -0.3615 | 0.1346  | -2.686  | 0.00723  | 0.02928  | 84283.9 | 72883.2 | 80268.4 | 63174.4 | 69674.4 | 51957.1 | Down |
| Gm43032   | 36.0674 | -0.8771 | 0.40444 | -2.1687 | 0.03011  | 0.09204  | 39.6676 | 59.412  | 41.06   | 24.8812 | 23.2326 | 28.1512 | Down |
| 4921504A  | 60.3888 | -0.871  | 0.33499 | -2.6001 | 0.00932  | 0.03606  | 69.6601 | 93.9093 | 70.6613 | 33.1749 | 50.6892 | 44.2376 | Down |
| Magi2     | 412.493 | -0.9802 | 0.21389 | -4.583  | 4.58E-06 | 4.89E-05 | 504.068 | 635.325 | 503.223 | 299.611 | 206.981 | 325.75  | Down |
| Gm29254   | 4.33784 | -3.5432 | 1.43617 | -2.4671 | 0.01362  | 0.04919  | 5.80501 | 10.5408 | 7.63906 | 1.03672 | 0       | 1.0054  | Down |
| Ptpn12    | 8294.56 | 0.61897 | 0.12216 | 5.06701 | 4.04E-07 | 5.43E-06 | 6648.67 | 6052.36 | 6924.81 | 9753.42 | 11358.6 | 9029.51 | Up   |
| Gsap      | 8295.35 | 1.54885 | 0.1306  | 11.8599 | 1.91E-32 | 4.53E-30 | 4849.12 | 3773.62 | 4055.39 | 11622.6 | 13538.2 | 11933.1 | Up   |
| Fam185a   | 527.771 | -0.2791 | 0.14012 | -1.9918 | 0.04639  | 0.12867  | 589.208 | 588.371 | 558.606 | 491.403 | 419.242 | 519.792 | Down |
| Fbxl13    | 1163.65 | -0.5828 | 0.27169 | -2.145  | 0.03195  | 0.09619  | 1172.61 | 1514.05 | 1500.12 | 1051.23 | 535.405 | 1208.49 | Down |
| Armc10    | 3162.1  | 0.84846 | 0.11251 | 7.54131 | 4.65E-14 | 2.08E-12 |         |         |         |         |         |         |      |

|          |         |         |         |         |          |          |         |         |         |         |         |         |      |
|----------|---------|---------|---------|---------|----------|----------|---------|---------|---------|---------|---------|---------|------|
| 2700038G | 74.1017 | -0.7987 | 0.29443 | -2.7128 | 0.00667  | 0.02739  | 96.7501 | 76.6607 | 108.857 | 54.9459 | 59.1374 | 48.2592 | Down |
| Klhl7    | 2874.74 | -0.2521 | 0.10658 | -2.365  | 0.01803  | 0.06156  | 2964.42 | 3108.59 | 3302.94 | 2627.04 | 2417.24 | 2828.19 | Down |
| Kcnh2    | 854.593 | -1.3511 | 0.18805 | -7.1848 | 6.73E-13 | 2.49E-11 | 1085.54 | 1566.75 | 1031.27 | 501.77  | 485.772 | 456.452 | Down |
| Nos3     | 339.038 | -1.1628 | 0.21854 | -5.3209 | 1.03E-07 | 1.53E-06 | 344.431 | 499.253 | 562.426 | 210.453 | 218.597 | 199.069 | Down |
| Abcb8    | 1423.37 | 0.32912 | 0.12467 | 2.63993 | 0.00829  | 0.03277  | 1220.02 | 1400.02 | 1164.96 | 1629.72 | 1671.69 | 1453.81 | Up   |
| Slc4a2   | 2071.93 | 0.8168  | 0.117   | 6.98105 | 2.93E-12 | 9.75E-11 | 1654.43 | 1356.89 | 1490.57 | 2724.49 | 2479.55 | 2725.64 | Up   |
| Asb10    | 66.2244 | -4.4446 | 0.79025 | -5.6242 | 1.86E-08 | 3.19E-07 | 62.8876 | 281.728 | 35.3307 | 5.18358 | 3.16808 | 9.04861 | Down |
| Chpf2    | 830.341 | 0.57056 | 0.12822 | 4.44995 | 8.59E-06 | 8.58E-05 | 661.771 | 625.743 | 717.117 | 1059.52 | 1019.06 | 898.828 | Up   |
| Wdr86    | 80.218  | 1.07496 | 0.40879 | 2.62962 | 0.00855  | 0.03358  | 81.2701 | 46.9547 | 26.7367 | 115.075 | 107.715 | 103.556 | Up   |
| Xrcc2    | 223.286 | -0.3902 | 0.18564 | -2.102  | 0.03556  | 0.10453  | 282.51  | 236.69  | 240.63  | 181.425 | 216.485 | 181.978 | Down |
| Actr3b   | 89.8452 | -1.7211 | 0.42187 | -4.0795 | 4.51E-05 | 0.00037  | 93.8476 | 209.859 | 109.812 | 35.2483 | 59.1374 | 31.1674 | Down |
| Gm21663  | 2.91372 | 4.00117 | 1.72657 | 2.31741 | 0.02048  | 0.06802  | 0       | 0       | 0.95488 | 6.2203  | 5.28013 | 5.027   | Up   |
| Gm7347   | 2.89039 | 5.03347 | 2.39233 | 2.10401 | 0.03538  | 0.10411  | 0       | 0       | 0       | 8.29373 | 0       | 9.04861 | Up   |
| Gm10220  | 10.7445 | 5.94442 | 1.44302 | 4.11943 | 3.80E-05 | 0.00032  | 0       | 0.95826 | 0       | 10.3672 | 17.9524 | 35.189  | Up   |
| Gm7361   | 149.028 | 3.00941 | 1.06399 | 2.82841 | 0.00468  | 0.0205   | 11.61   | 77.619  | 9.54883 | 245.702 | 99.2664 | 450.42  | Up   |
| Dpp6     | 338.671 | -2.0378 | 0.27615 | -7.3791 | 1.59E-13 | 6.59E-12 | 422.798 | 727.318 | 484.126 | 128.553 | 100.322 | 168.907 | Down |
| Paxip1   | 2847.57 | -0.2524 | 0.11593 | -2.1773 | 0.02945  | 0.09065  | 3279.83 | 3112.42 | 2896.16 | 2679.91 | 2320.09 | 2797.03 | Down |
| Insig1   | 7221.08 | 1.15878 | 0.16176 | 7.16359 | 7.86E-13 | 2.85E-11 | 3947.41 | 5094.1  | 4360.95 | 9749.28 | 11835.9 | 8338.79 | Up   |
| Cnpy1    | 248.864 | 3.95944 | 0.33249 | 11.9085 | 1.07E-32 | 2.71E-30 | 19.35   | 44.0799 | 26.7367 | 559.827 | 328.424 | 514.765 | Up   |
| 9530036C | 1012.93 | 0.26873 | 0.12694 | 2.11697 | 0.03426  | 0.10152  | 995.559 | 853.808 | 907.139 | 1195.33 | 1118.33 | 1007.41 | Up   |
| Il6      | 262.094 | 3.357   | 0.75737 | 4.43242 | 9.32E-06 | 9.22E-05 | 9.67501 | 78.5772 | 51.5637 | 380.475 | 516.396 | 535.879 | Up   |
| Hadhb    | 6647.4  | -0.5555 | 0.21407 | -2.5948 | 0.00946  | 0.0365   | 6717.36 | 10898.3 | 6118.89 | 5498.74 | 5828.2  | 4822.91 | Down |
| Adgrf3   | 54.4899 | 2.08332 | 0.35992 | 5.7883  | 7.11E-09 | 1.33E-07 | 19.35   | 25.873  | 17.1879 | 75.6803 | 101.378 | 87.4699 | Up   |
| Selenoi  | 1838.54 | 0.20633 | 0.0891  | 2.31574 | 0.02057  | 0.06821  | 1658.3  | 1710.49 | 1753.16 | 1978.05 | 1910.35 | 2020.86 | Up   |
| Drc1     | 2507.19 | -0.8273 | 0.23732 | -3.486  | 0.00049  | 0.00305  | 2828.01 | 3558.01 | 3235.14 | 1985.31 | 1137.34 | 2299.35 | Down |
| Fam166c  | 1060.1  | -0.8265 | 0.21722 | -3.8048 | 0.00014  | 0.00103  | 1078.76 | 1545.67 | 1442.83 | 885.355 | 554.413 | 853.585 | Down |
| Cib4     | 52.4489 | -1.5936 | 0.37711 | -4.2259 | 2.38E-05 | 0.00021  | 100.62  | 61.3286 | 74.4809 | 22.8077 | 24.2886 | 31.1674 | Down |
| Gm9899   | 205.481 | -2.0648 | 0.24832 | -8.3149 | 9.19E-17 | 5.83E-15 | 274.77  | 397.677 | 322.75  | 69.46   | 69.6977 | 98.5293 | Down |
| Kcnk3    | 1565.95 | -1.0633 | 0.24202 | -4.3934 | 1.12E-05 | 0.00011  | 1597.34 | 2984.02 | 1773.22 | 1090.63 | 1111.99 | 838.504 | Down |
| Slc35f6  | 1970.73 | 0.27729 | 0.11146 | 2.4877  | 0.01286  | 0.04693  | 1777.3  | 1854.23 | 1714.01 | 2131.49 | 2369.72 | 1977.62 | Up   |
| Dpysl5   | 416.389 | -1.2247 | 0.18142 | -6.751  | 1.47E-11 | 4.49E-10 | 553.411 | 513.627 | 682.741 | 219.784 | 250.278 | 278.496 | Down |
| Mapre3   | 4735.15 | -0.284  | 0.11554 | -2.4579 | 0.01397  | 0.05021  | 4961.35 | 5484.11 | 5153.5  | 4791.7  | 4134.34 | 3885.87 | Down |
| Tmem214  | 3749.09 | 0.24033 | 0.09857 | 2.43822 | 0.01476  | 0.05239  | 3386.26 | 3376.9  | 3549.3  | 4387.38 | 4023.46 | 3771.26 | Up   |
| Tcf23    | 438.693 | -1.0277 | 0.27672 | -3.7137 | 0.0002   | 0.00142  | 754.651 | 518.418 | 492.72  | 324.492 | 355.881 | 185.999 | Down |
| Trim54   | 154.714 | -6.3461 | 1.01414 | -6.2576 | 3.91E-10 | 9.27E-09 | 147.06  | 642.992 | 126.999 | 4.14686 | 1.05603 | 6.03241 | Down |
| Nrbp1    | 6213.07 | -0.2136 | 0.08189 | -2.6081 | 0.0091   | 0.03533  | 6392.28 | 6687.69 | 6936.27 | 5884.4  | 5781.74 | 5596.06 | Down |
| Krtcap3  | 1576.31 | 0.53928 | 0.12147 | 4.43948 | 9.02E-06 | 8.95E-05 | 1268.39 | 1348.27 | 1238.48 | 2087.95 | 1822.7  | 1692.09 | Up   |
| Fndc4    | 291.624 | -0.6881 | 0.1856  | -3.7074 | 0.00021  | 0.00145  | 379.261 | 399.594 | 300.788 | 245.702 | 212.261 | 212.14  | Down |
| Gpn1     | 1364.61 | -0.2016 | 0.0987  | -2.0426 | 0.04109  | 0.11701  | 1372.88 | 1493.93 | 1512.53 | 1296.93 | 1255.61 | 1255.75 | Down |
| 2900076G | 7.96621 | -2.0356 | 0.95679 | -2.1275 | 0.03338  | 0.09942  | 9.67501 | 17.2487 | 11.4586 | 2.07343 | 6.33615 | 1.0054  | Down |
| Fosl2    | 4720.07 | 0.40268 | 0.1021  | 3.9439  | 8.02E-05 | 0.00063  | 4176.7  | 4001.69 | 4018.15 | 5151.44 | 5924.3  | 5048.12 | Up   |
| Plb1     | 716.964 | 0.4802  | 0.19675 | 2.44062 | 0.01466  | 0.05208  | 760.456 | 459.964 | 575.794 | 851.144 | 871.221 | 783.207 | Up   |
| Pisd     | 1592.15 | 0.28051 | 0.11055 | 2.53734 | 0.01117  | 0.04184  | 1555.74 | 1399.06 | 1358.8  | 1865.05 | 1680.14 | 1694.1  | Up   |
| Gm20671  | 153.742 | -0.4591 | 0.20063 | -2.2883 | 0.02212  | 0.07222  | 189.63  | 160.029 | 184.292 | 133.736 | 134.115 | 120.648 | Down |
| Depdc5   | 1407.93 | 0.41578 | 0.15117 | 2.75036 | 0.00595  | 0.02502  | 1423.19 | 1067.5  | 1128.67 | 1461.77 | 1748.78 | 1617.69 | Up   |
| Slc5a1   | 1494.26 | 3.07522 | 0.19099 | 16.1018 | 2.48E-58 | 4.11E-55 | 341.528 | 348.806 | 260.683 | 2412.44 | 2286.39 | 3315.81 | Up   |
| Spon2    | 699.84  | -2.2865 | 0.75911 | -3.0121 | 0.00259  | 0.01244  | 316.373 | 1367.44 | 1800.91 | 235.334 | 344.264 | 134.724 | Down |
| Fam53a   | 1884.69 | -0.316  | 0.10293 | -3.0702 | 0.00214  | 0.01054  | 1960.16 | 2197.29 | 2113.16 | 1649.41 | 1780.46 | 1607.64 | Down |
| Gm9903   | 19.3329 | -1.8038 | 0.59088 | -3.0527 | 0.00227  | 0.01108  | 19.35   | 41.2051 | 29.6014 | 8.29373 | 9.50423 | 8.04321 | Down |
| Tacc3    | 337.439 | 0.48868 | 0.16497 | 2.96221 | 0.00305  | 0.0143   | 316.373 | 254.897 | 271.187 | 420.907 | 402.346 | 358.928 | Up   |
| Fgfr3    | 9899.19 | -0.9802 | 0.13115 | -7.474  | 7.78E-14 | 3.38E-12 | 12022.2 | 12970   | 14423.5 | 7304.7  | 5738.44 | 6936.26 | Down |
| Letm1    | 3654.53 | 0.23376 | 0.10134 | 2.3067  | 0.02107  | 0.06946  | 3291.44 | 3650.01 | 3135.84 | 3803.71 | 4110.05 | 3936.14 | Up   |
| Nsd2     | 2271.17 | 0.29633 | 0.13388 | 2.21335 | 0.02687  | 0.08436  | 2089.8  | 1863.81 | 2162.81 | 2491.23 | 2189.14 | 2830.2  | Up   |
| Nelfa    | 1552.59 | -0.2186 | 0.09478 | -2.3059 | 0.02112  | 0.06958  | 1712.48 | 1640.54 | 1656.72 | 1447.26 | 1493.22 | 1365.33 | Down |
| Gm42847  | 4.02812 | -3.4038 | 1.60625 | -2.1191 | 0.03408  | 0.1011   | 3.87001 | 12.4574 | 5.7293  | 0       | 2.11205 | 0       | Down |
| Nat8l    | 197.324 | -1.2834 | 0.24486 | -5.2411 | 1.60E-07 | 2.29E-06 | 256.388 | 360.305 | 222.488 | 122.332 | 109.827 | 112.605 | Down |
| Zfyve28  | 320.492 | 0.67516 | 0.15355 | 4.39699 | 1.10E-05 | 0.00011  | 264.128 | 243.398 | 232.991 | 365.961 | 421.354 | 395.123 | Up   |
| Sh3bp2   | 1147.43 | 1.35003 | 0.22152 | 6.09445 | 1.10E-09 | 2.42E-08 | 815.604 | 613.286 | 510.862 | 1611.06 | 2031.79 | 1301.99 | Up   |
| Htt      | 1034.83 | 0.75663 | 0.14882 | 5.08431 | 3.69E-07 | 5.00E-06 | 724.659 | 751.275 | 832.658 | 1088.55 | 1379.17 | 1432.7  | Up   |
| Rgs12    | 3080.77 | -0.2795 | 0.11084 | -2.5213 | 0.01169  | 0.04346  | 3114.39 | 3243.71 | 3776.56 | 2714.12 | 2801.64 | 2834.23 | Down |
| Hgfac    | 777.275 | 2.13032 | 0.14105 | 15.1034 | 1.54E-51 | 1.66E-48 | 304.763 | 287.478 | 275.006 | 1339.44 | 1106.71 | 1350.25 | Up   |
| Dok7     | 183.112 | -1.5506 | 0.36409 | -4.2589 | 2.05E-05 | 0.00019  | 172.215 | 413.009 | 233.946 | 89.1576 | 69.6977 | 120.648 | Down |
| Acox3    | 3674.62 | 0.87572 | 0.14077 | 6.22103 | 4.94E-10 | 1.14E-08 | 2915.08 | 2652.46 | 2209.6  | 4592.65 | 5284.35 | 4393.6  | Up   |
| Htra3    | 963.841 | -1.6317 | 0.22704 | -7.187  | 6.62E-13 | 2.45E-11 | 1208.41 | 1904.06 | 1259.49 | 537.019 | 511.116 | 362.95  | Down |
| Ablim2   | 465.088 | -0.7479 | 0.18607 | -4.0195 | 5.83E-05 | 0.00047  | 510.841 | 705.278 | 532.825 | 313.088 | 389.673 | 338.82  | Down |
| Sorcs2   | 4151.95 | 1.41968 | 0.13917 | 10.2013 | 1.96E-24 | 2.48E-22 | 2632.57 | 2090.92 | 2054.91 | 5740.3  | 5693.03 | 6699.99 | Up   |
| Tada2b   | 1583.29 | 0.25121 | 0.12156 | 2.06662 | 0.03877  | 0.11177  | 1582.83 | 1325.27 | 1429.46 | 1777.97 | 1573.48 | 1810.73 | Up   |
| Tbc1d14  | 3493.1  | 0.74334 | 0.117   | 6.35351 | 2.10E-10 | 5.30E-09 | 2908.31 | 2564.3  | 2365.24 | 4087.77 | 4581.04 | 4451.92 | Up   |
| D5Ert57c | 542.679 | 0.45703 | 0.18834 | 2.42656 | 0.01524  | 0.05375  | 491.491 | 424.509 | 456.434 | 499.697 | 618.831 | 765.11  | Up   |
| Man2b2   | 5220.05 | 0.96477 | 0.13344 | 7.22984 | 4.84E-13 | 1.84E-11 | 4131.23 | 3460.27 | 3019.34 | 6938.74 | 6831.43 | 6939.28 | Up   |
| Ppp2r2c  | 884.943 | -0.7486 | 0.27164 | -2.7557 | 0.00586  | 0.02471  | 873.654 | 1102.96 | 1352.11 | 679.049 | 417.13  | 884.753 | Down |
| Evc      | 794.145 | -0.6913 | 0.13699 | -5.0459 | 4.51E-07 | 6.00E-06 | 1113.59 | 911.304 | 917.642 | 643.801 | 591.374 | 587.154 | Down |
| Evc2     | 856.971 | -0.5528 | 0.11619 | -4.7576 | 1.96E-06 | 2.26E-05 | 1032.32 | 985.09  | 1039.87 | 725.701 | 724.433 | 634.408 | Down |
| Cyt11    | 1108.54 | -1.5498 | 0.13529 | -11.455 | 2.21E-30 | 4.49E-28 | 1542.2  | 1865.73 | 1549.77 | 600.258 | 574.478 | 518.787 | Down |
| Nsg1     | 2390.28 | -0.716  | 0.17091 | -4.1893 | 2.80E-05 | 0.00025  | 2423.59 | 2853.69 | 3637.15 | 1791.44 | 1998    | 1637.8  | Down |
| Lyar     | 966.168 | -0.2933 | 0.11611 | -2.526  | 0.01154  | 0.043    | 1116.5  | 997.547 | 1078.06 | 805.528 | 916.63  | 882.742 | Down |
| Otop1    | 32.9226 | -8.4375 | 2.51595 | -3.3536 | 0.0008   | 0.0046   | 15.48   | 178.236 | 3.81953 | 0       |         |         |      |

|           |         |         |         |         |          |          |         |         |         |         |         |         |      |
|-----------|---------|---------|---------|---------|----------|----------|---------|---------|---------|---------|---------|---------|------|
| Bst1      | 2836.5  | 2.20842 | 0.49363 | 4.47387 | 7.68E-06 | 7.79E-05 | 1639.91 | 829.852 | 557.652 | 4473.43 | 5684.58 | 3833.59 | Up   |
| Cd38      | 2392.79 | -0.2426 | 0.11861 | -2.0453 | 0.04083  | 0.11637  | 2821.23 | 2333.36 | 2625.93 | 2021.6  | 2310.58 | 2244.05 | Down |
| Fgfbp1    | 812.021 | -0.9006 | 0.25078 | -3.5911 | 0.00033  | 0.00215  | 1340.96 | 934.302 | 897.59  | 631.36  | 381.225 | 686.689 | Down |
| Prom1     | 6291.63 | 1.0494  | 0.29423 | 3.56659 | 0.00036  | 0.00234  | 3458.82 | 4773.09 | 4065.89 | 8491.74 | 4574.7  | 12385.5 | Up   |
| Gm42984   | 309.993 | -0.7274 | 0.1682  | -4.3247 | 1.53E-05 | 0.00014  | 353.138 | 439.841 | 366.675 | 235.334 | 219.653 | 245.318 | Down |
| Ldb2      | 4125.74 | -0.3885 | 0.14047 | -2.7654 | 0.00569  | 0.02413  | 4071.25 | 4577.6  | 5384.58 | 3255.29 | 3934.75 | 3530.97 | Down |
| Lap3      | 4429.66 | 0.86951 | 0.12306 | 7.0658  | 1.60E-12 | 5.59E-11 | 3109.55 | 3559.93 | 2731.92 | 5589.97 | 5690.92 | 5895.67 | Up   |
| Med28     | 3491.98 | -0.203  | 0.10134 | -2.0027 | 0.04521  | 0.12605  | 3607.81 | 3717.09 | 3886.37 | 3220.04 | 3513.4  | 3007.15 | Down |
| Ncapg     | 78.8255 | 1.11057 | 0.35344 | 3.14218 | 0.00168  | 0.00859  | 47.4076 | 53.6625 | 48.699  | 92.2677 | 77.0899 | 153.826 | Up   |
| Lcorl     | 754.68  | 0.32585 | 0.1459  | 2.23336 | 0.02552  | 0.08097  | 677.251 | 634.367 | 698.019 | 772.353 | 769.842 | 976.244 | Up   |
| Kcnp4     | 1067.33 | -0.6002 | 0.2394  | -2.5072 | 0.01217  | 0.04489  | 945.249 | 1596.46 | 1316.78 | 1067.82 | 833.204 | 644.462 | Down |
| Adgra3    | 3794.71 | -0.4366 | 0.08857 | -4.93   | 8.22E-07 | 1.04E-05 | 4430.19 | 4275.75 | 4387.69 | 3126.74 | 3434.19 | 269.447 | Down |
| Ppargc1a  | 405.749 | -1.5403 | 0.3115  | -4.9448 | 7.62E-07 | 9.70E-06 | 383.131 | 849.017 | 579.614 | 195.939 | 157.348 | 269.447 | Down |
| Sod3      | 12274.8 | -0.4677 | 0.14996 | -3.1191 | 0.00181  | 0.00918  | 13127.1 | 14036.6 | 15578   | 10577.6 | 11916.2 | 8413.19 | Down |
| Ccdc149   | 667.388 | 0.45438 | 0.14303 | 3.17686 | 0.00149  | 0.00779  | 597.916 | 577.83  | 513.727 | 869.805 | 719.153 | 725.899 | Up   |
| Seppsecs  | 2603.33 | 0.35976 | 0.14467 | 2.48675 | 0.01289  | 0.04702  | 2575.49 | 2040.13 | 2225.83 | 2892.44 | 2568.25 | 3317.82 | Up   |
| Pi4k2b    | 14231.1 | 1.0766  | 0.16903 | 6.36927 | 1.90E-10 | 4.83E-09 | 11427.2 | 7476.33 | 8560.53 | 19458.1 | 17535.3 | 20929.4 | Up   |
| Slc34a2   | 158978  | 1.63363 | 0.16781 | 9.73487 | 2.14E-22 | 2.31E-20 | 98074.7 | 64674.8 | 69736.1 | 230305  | 259557  | 231523  | Up   |
| Sel1l3    | 837.861 | 1.987   | 0.18963 | 10.478  | 1.09E-25 | 1.57E-23 | 397.643 | 313.351 | 301.743 | 1081.29 | 1580.87 | 1352.26 | Up   |
| Cckar     | 4531.6  | -0.9408 | 0.25938 | -3.627  | 0.00029  | 0.00191  | 7084.05 | 5099.85 | 5693.01 | 3691.75 | 1819.53 | 3801.42 | Down |
| Pcdh7     | 625.474 | -1.244  | 0.29261 | -4.2513 | 2.13E-05 | 0.00019  | 692.731 | 1315.69 | 630.223 | 405.356 | 420.298 | 288.55  | Down |
| Gm9954    | 42.8403 | 3.15861 | 0.5966  | 5.29435 | 1.19E-07 | 1.75E-06 | 1.935   | 14.3739 | 9.54883 | 60.1295 | 107.715 | 63.3403 | Up   |
| Nwd2      | 511.316 | 2.71599 | 0.38154 | 7.11857 | 1.09E-12 | 3.89E-11 | 66.7576 | 110.2   | 228.217 | 806.565 | 1157.4  | 698.754 | Up   |
| 0610040J  | 2219.01 | 0.9635  | 0.15913 | 6.05474 | 1.41E-09 | 3.04E-08 | 1184.22 | 1691.33 | 1637.62 | 3001.29 | 2715.04 | 3084.57 | Up   |
| Tbc1d1    | 2103.14 | -0.4106 | 0.14866 | -2.762  | 0.00574  | 0.02433  | 2111.09 | 2903.52 | 2186.68 | 1821.51 | 1756.17 | 1839.88 | Down |
| Tlr1      | 317.705 | 0.49348 | 0.19837 | 2.48775 | 0.01286  | 0.04693  | 303.795 | 254.897 | 232.991 | 306.868 | 426.634 | 381.047 | Up   |
| Tlr6      | 148.074 | 0.8332  | 0.40311 | 2.06693 | 0.03874  | 0.11173  | 148.995 | 119.782 | 50.6088 | 156.618 | 256.614 | 153.826 | Up   |
| Fam114a1  | 2326.69 | -0.4614 | 0.10034 | -4.5984 | 4.26E-06 | 4.58E-05 | 2573.55 | 2912.15 | 2601.1  | 1898.23 | 2029.68 | 1945.45 | Down |
| Tmem156   | 299.597 | 0.43626 | 0.20621 | 2.11563 | 0.03438  | 0.1018   | 299.925 | 229.982 | 233.946 | 314.125 | 413.962 | 305.642 | Up   |
| Klhl5     | 18429.2 | -0.3994 | 0.11626 | -3.4352 | 0.00059  | 0.00358  | 19183.6 | 20593.9 | 23113.9 | 15451.2 | 17411.7 | 14820.6 | Down |
| Klb       | 19.6113 | -1.7032 | 0.81349 | -2.0937 | 0.03629  | 0.10628  | 8.70751 | 53.6625 | 27.6916 | 5.18368 | 6.33615 | 16.0864 | Down |
| Rpl9      | 19921.9 | -0.2762 | 0.10594 | -2.6071 | 0.00913  | 0.0354   | 22757.6 | 19935.6 | 22775.9 | 18873.4 | 18662.1 | 16526.8 | Down |
| N4bp2os   | 170.347 | -0.4425 | 0.19826 | -2.232  | 0.02562  | 0.08116  | 217.688 | 198.36  | 172.834 | 144.104 | 137.283 | 151.816 | Down |
| Chrna9    | 116.74  | -0.9573 | 0.3185  | -3.0057 | 0.00265  | 0.01265  | 129.645 | 117.866 | 214.849 | 89.1576 | 65.4736 | 83.4483 | Down |
| Rbm47     | 2775.61 | 0.82883 | 0.12469 | 6.64726 | 2.99E-11 | 8.65E-10 | 1734.73 | 2242.33 | 2021.49 | 3408.72 | 3680.25 | 3566.16 | Up   |
| Nsun7     | 579.844 | -0.6005 | 0.21864 | -2.7465 | 0.00602  | 0.02525  | 490.523 | 759.899 | 846.026 | 432.311 | 444.587 | 505.717 | Down |
| Apbb2     | 2742.99 | -0.2497 | 0.09385 | -2.661  | 0.00779  | 0.03113  | 2850.26 | 2914.06 | 3174.99 | 2429.03 | 2585.15 | 2504.45 | Down |
| Uchl1     | 347.894 | -1.0261 | 0.20601 | -4.981  | 6.32E-07 | 8.19E-06 | 518.581 | 524.167 | 357.126 | 230.151 | 249.222 | 208.118 | Down |
| Limch1    | 32505.9 | -0.5676 | 0.10023 | -5.6625 | 1.49E-08 | 2.61E-07 | 40071   | 36683.1 | 39702.1 | 26895.5 | 27855.8 | 23828   | Down |
| Gm33167   | 6.31766 | 6.16176 | 1.56557 | 3.93579 | 8.29E-05 | 0.00064  | 0       | 0       | 0       | 8.29373 | 9.50423 | 20.108  | Up   |
| Tmem33    | 5923.88 | 0.3432  | 0.07673 | 4.47261 | 7.73E-06 | 7.83E-05 | 5192.58 | 5159.26 | 5315.83 | 6407.94 | 6780.74 | 6686.92 | Up   |
| Bend4     | 255.321 | 0.41088 | 0.17212 | 2.38717 | 0.01698  | 0.05868  | 206.078 | 208.9   | 242.54  | 304.794 | 305.191 | 264.42  | Up   |
| Atp8a1    | 1465.03 | 0.47209 | 0.14976 | 3.15234 | 0.00162  | 0.00835  | 1194.86 | 1134.58 | 1353.07 | 1521.9  | 1584.04 | 2001.75 | Up   |
| Kctd8     | 347.218 | -0.5489 | 0.21454 | -2.5584 | 0.01051  | 0.03986  | 456.661 | 412.051 | 368.585 | 239.481 | 362.217 | 244.312 | Down |
| Yipf7     | 105.53  | -5.3272 | 0.67382 | -7.906  | 2.66E-15 | 1.39E-13 | 117.068 | 397.677 | 103.127 | 4.14686 | 2.11205 | 9.04861 | Down |
| Guf1      | 1316.28 | -0.2712 | 0.1078  | -2.5161 | 0.01186  | 0.04396  | 1340.96 | 1555.25 | 1422.78 | 1173.56 | 1172.56 | 1226.59 | Down |
| Gabra4    | 60.2886 | -0.7598 | 0.32972 | -2.3044 | 0.0212   | 0.06979  | 64.8226 | 66.1198 | 96.4432 | 43.5421 | 48.5772 | 42.2268 | Down |
| Gabbr1    | 82.0614 | -0.7654 | 0.33404 | -2.2913 | 0.02195  | 0.07176  | 86.1076 | 139.906 | 84.0297 | 50.7991 | 59.1374 | 72.3889 | Down |
| Corin     | 450.233 | -2.432  | 0.622   | -3.91   | 9.23E-05 | 0.00071  | 475.043 | 1428.76 | 375.269 | 109.892 | 162.628 | 149.805 | Down |
| Nipal1    | 520.562 | 1.27494 | 0.22062 | 5.77888 | 7.52E-09 | 1.40E-07 | 406.351 | 268.312 | 238.721 | 659.351 | 761.394 | 789.24  | Up   |
| Txk       | 154.416 | -0.7926 | 0.29144 | -2.7197 | 0.00654  | 0.02696  | 167.378 | 215.608 | 204.345 | 74.6435 | 148.9   | 115.621 | Down |
| Tec       | 860.251 | 0.6672  | 0.13902 | 4.79924 | 1.59E-06 | 1.88E-05 | 749.814 | 635.325 | 609.215 | 1055.38 | 1141.56 | 970.212 | Up   |
| Sgcb      | 2400.77 | -0.744  | 0.12299 | -6.0492 | 1.46E-09 | 3.14E-08 | 2839.62 | 3417.15 | 2762.48 | 1876.46 | 1804.75 | 1704.15 | Down |
| Gm6116    | 51.2211 | 1.99902 | 0.41004 | 4.87515 | 1.09E-06 | 1.33E-05 | 22.2525 | 21.0817 | 18.1428 | 96.4146 | 97.1543 | 52.2808 | Up   |
| Pdgfra    | 11460.8 | -1.0511 | 0.13011 | -8.0789 | 6.54E-16 | 3.75E-14 | 14814.4 | 14005   | 17562.2 | 7896.66 | 7845.21 | 6641.68 | Down |
| Kdr       | 11852.9 | -0.4824 | 0.1529  | -3.1548 | 0.00161  | 0.00829  | 13763.7 | 11688.8 | 15996.2 | 8885.69 | 11317.4 | 9465.85 | Down |
| Srd5a3    | 2017.95 | 0.46559 | 0.11393 | 4.08674 | 4.37E-05 | 0.00036  | 1670.88 | 1800.57 | 1613.75 | 2334.68 | 2551.36 | 2136.48 | Up   |
| Tmem165   | 6056.02 | 0.27631 | 0.07763 | 3.55938 | 0.00037  | 0.00239  | 5613.44 | 5485.07 | 5334.93 | 6614.25 | 6816.64 | 6471.77 | Up   |
| Gm7467    | 12.4743 | -2.4709 | 0.82617 | -2.9907 | 0.00278  | 0.0132   | 17.415  | 30.6643 | 15.2781 | 4.14686 | 6.33615 | 1.0054  | Down |
| C530008N  | 591.624 | 1.58536 | 0.33555 | 4.72471 | 2.30E-06 | 2.62E-05 | 252.518 | 455.173 | 179.518 | 759.913 | 1203.87 | 698.754 | Up   |
| Aasdh     | 912.258 | -0.2302 | 0.11169 | -2.0614 | 0.03926  | 0.11285  | 1001.36 | 934.302 | 1018.86 | 855.291 | 876.501 | 787.229 | Down |
| Srp72     | 5567.21 | 0.3754  | 0.08877 | 4.2287  | 2.35E-05 | 0.00021  | 5181.94 | 4685.88 | 4673.2  | 6361.29 | 6119.67 | 6381.28 | Up   |
| Thegl     | 107.235 | -0.5835 | 0.26705 | -2.1851 | 0.02888  | 0.08937  | 122.873 | 145.655 | 117.451 | 97.4513 | 65.4736 | 94.5077 | Down |
| Hopx      | 28046.6 | -0.5793 | 0.14721 | -3.9352 | 8.31E-05 | 0.00064  | 32532.2 | 33851.4 | 34424.5 | 25532.2 | 24094.3 | 17844.9 | Down |
| Rest      | 1551.02 | 0.39931 | 0.13019 | 3.06721 | 0.00216  | 0.01063  | 1502.53 | 1219.86 | 1291    | 1708.51 | 1655.85 | 1928.36 | Up   |
| Adgrl3    | 1969.14 | -0.3803 | 0.1089  | -3.4923 | 0.00048  | 0.00299  | 2446.81 | 2147.46 | 2087.37 | 1784.19 | 1678.02 | 1670.98 | Down |
| Tecr1     | 205.732 | -1.9437 | 0.40944 | -4.7473 | 2.06E-06 | 2.37E-05 | 292.185 | 531.834 | 155.646 | 89.1576 | 98.2104 | 67.3619 | Down |
| Stap1     | 421.745 | 0.36577 | 0.15881 | 2.30318 | 0.02127  | 0.07     | 413.123 | 362.222 | 330.389 | 428.164 | 507.948 | 488.625 | Up   |
| Tmprss11i | 6.75961 | -3.586  | 1.23027 | -2.9148 | 0.00356  | 0.01629  | 7.74001 | 19.1652 | 10.5037 | 1.03672 | 2.11205 | 0       | Down |
| Sult1d1   | 2860.76 | -2.743  | 0.87121 | -3.1485 | 0.00164  | 0.00845  | 3071.82 | 8009.13 | 3852.95 | 551.533 | 191.141 | 1487.99 | Down |
| Sult1e1   | 4.49262 | -3.6129 | 1.74028 | -2.076  | 0.03789  | 0.10988  | 3.87001 | 19.1652 | 1.90977 | 0       | 0       | 2.0108  | Down |
| Jchain    | 5434.12 | 2.17045 | 0.29074 | 7.46536 | 8.31E-14 | 3.58E-12 | 2359.74 | 2499.14 | 1067.56 | 7339.95 | 8020.51 | 11317.8 | Up   |
| Rufy3     | 1438.22 | 0.38641 | 0.09378 | 4.1203  | 3.78E-05 | 0.00032  | 1290.65 | 1202.61 | 1247.08 | 1664.97 | 1587.21 | 1636.79 | Up   |
| Mob1b     | 5949.49 | 0.49001 | 0.1108  | 4.42257 | 9.75E-06 | 9.57E-05 | 5391.89 | 4933.12 | 4521.37 | 6637.05 | 6714.21 | 7499.29 | Up   |
| Dck       | 876.228 | 0.83647 | 0.17003 | 4.91956 | 8.67E-07 | 1.09E-05 | 739.171 | 657.365 | 490.81  | 1097.88 | 1152.12 | 1120.02 | Up   |
| Gm9958    | 112.316 | -0.7577 | 0.24345 | -3.1123 | 0.00186  | 0.00936  | 148.995 | 139.906 | 134.638 | 69.46   | 82.37   | 98.5293 | Down |
| Gm43449   | 39.8079 | 2.02753 | 0.50202 | 4.03875 | 5.37E-05 | 0.00044  | 18.3825 | 13.4156 | 15.2781 |         |         |         |      |

|          |         |         |         |         |          |          |         |         |         |         |         |         |      |
|----------|---------|---------|---------|---------|----------|----------|---------|---------|---------|---------|---------|---------|------|
| Gm43085  | 17787.6 | 1.34943 | 0.12506 | 10.7901 | 3.84E-27 | 6.46E-25 | 9775.63 | 10066.5 | 10237.3 | 24756.8 | 29545.5 | 22344   | Up   |
| Cxcl1    | 367.718 | 2.20499 | 0.2466  | 8.94148 | 3.84E-19 | 3.11E-17 | 83.2051 | 162.904 | 147.052 | 651.058 | 583.982 | 578.105 | Up   |
| Cxcl2    | 228.368 | 3.38851 | 0.46012 | 7.36443 | 1.78E-13 | 7.23E-12 | 75.4651 | 26.8312 | 17.1879 | 435.421 | 522.733 | 292.572 | Up   |
| Epgn     | 22.4873 | 2.59321 | 0.58896 | 4.403   | 1.07E-05 | 0.0001   | 2.9025  | 6.70781 | 9.54883 | 34.2116 | 44.3531 | 37.1998 | Up   |
| Gm19610  | 8.37538 | 2.46921 | 0.94567 | 2.61107 | 0.00903  | 0.03506  | 1.935   | 4.79129 | 0.95488 | 14.514  | 19.0085 | 9.04861 | Up   |
| Ereg     | 80.1182 | 2.88261 | 0.70827 | 4.06993 | 4.70E-05 | 0.00039  | 1.935   | 13.4156 | 42.0148 | 131.663 | 191.141 | 100.54  | Up   |
| Areg     | 1241.48 | 1.02685 | 0.23082 | 4.44861 | 8.64E-06 | 8.62E-05 | 1105.85 | 557.707 | 788.733 | 1561.29 | 1821.64 | 1613.67 | Up   |
| Parm1    | 5229.19 | 2.03643 | 0.19215 | 10.5981 | 3.04E-26 | 4.59E-24 | 1643.78 | 2489.56 | 2015.76 | 8450.27 | 9975.22 | 6800.53 | Up   |
| Thap6    | 861.572 | 0.58864 | 0.14891 | 3.95307 | 7.72E-05 | 0.0006   | 607.591 | 717.736 | 739.079 | 1052.27 | 1147.9  | 904.861 | Up   |
| G3bp2    | 7455.71 | 0.35853 | 0.08292 | 4.32355 | 1.54E-05 | 0.00014  | 6668.99 | 6609.11 | 6324.19 | 8096.75 | 8235.94 | 8799.27 | Up   |
| Uso1     | 6423.28 | 0.30403 | 0.08222 | 3.6976  | 0.00022  | 0.00149  | 5569.91 | 5620.19 | 6056.82 | 7207.25 | 6960.26 | 7125.28 | Up   |
| Naaa     | 7401.97 | 0.74189 | 0.10219 | 7.25987 | 3.87E-13 | 1.49E-11 | 6110.74 | 5346.13 | 5162.1  | 9355.32 | 9489.44 | 8948.07 | Up   |
| Cxcl9    | 76.9487 | 1.33851 | 0.5661  | 2.36442 | 0.01806  | 0.06163  | 63.8551 | 52.7042 | 14.3232 | 111.965 | 55.9693 | 162.875 | Up   |
| Art3     | 2048.58 | -1.9848 | 0.31574 | -6.2863 | 3.25E-10 | 7.85E-09 | 2284.27 | 5398.83 | 2129.39 | 836.63  | 724.433 | 917.931 | Down |
| Scarb2   | 23108.6 | 0.56145 | 0.1275  | 4.4036  | 1.06E-05 | 0.0001   | 21890.7 | 17350.2 | 16763   | 26630.1 | 28095.6 | 27922   | Up   |
| Fam47e   | 1971.78 | -0.7915 | 0.23587 | -3.3558 | 0.00079  | 0.00458  | 2203.97 | 2708.04 | 2586.78 | 1644.23 | 907.126 | 1780.56 | Down |
| Sowahb   | 445.639 | 1.22641 | 0.21141 | 5.801   | 6.59E-09 | 1.24E-07 | 329.918 | 245.314 | 225.352 | 545.313 | 750.834 | 577.1   | Up   |
| Ccng2    | 3079.47 | -0.2916 | 0.11703 | -2.4919 | 0.01271  | 0.04646  | 3055.37 | 3667.26 | 3446.17 | 2924.58 | 2842.82 | 2540.65 | Down |
| Cxcl13   | 585.825 | 1.5801  | 0.58863 | 2.68437 | 0.00727  | 0.0294   | 205.11  | 488.712 | 187.157 | 909.2   | 472.043 | 1252.73 | Up   |
| Gm7993   | 656.13  | -1.1139 | 0.29334 | -3.7973 | 0.00015  | 0.00106  | 478.913 | 1176.74 | 1037    | 409.503 | 401.29  | 433.328 | Down |
| Anxa3    | 24934.7 | 0.59388 | 0.11009 | 5.39452 | 6.87E-08 | 1.05E-06 | 18756   | 20320.8 | 20544.3 | 29879.2 | 33139.1 | 26968.9 | Up   |
| Bmp2k    | 545.945 | 0.39321 | 0.14504 | 2.71109 | 0.00671  | 0.02752  | 437.311 | 510.752 | 467.893 | 552.57  | 673.744 | 633.403 | Up   |
| Prdx2    | 4715.07 | -0.2915 | 0.1088  | -2.6789 | 0.00739  | 0.02982  | 5006.82 | 5609.65 | 4952.98 | 4024.53 | 4063.59 | 4632.89 | Down |
| Prdm8    | 97.1205 | 0.99255 | 0.32038 | 3.09808 | 0.00195  | 0.00975  | 55.1476 | 76.6607 | 63.0223 | 118.186 | 173.188 | 96.5185 | Up   |
| Cfap299  | 1183.44 | -0.6012 | 0.22825 | -2.6339 | 0.00844  | 0.03321  | 1129.07 | 1751.7  | 1398.9  | 1054.34 | 673.744 | 1092.87 | Down |
| Bmp3     | 2720.83 | -0.7058 | 0.10141 | -6.9592 | 3.42E-12 | 1.13E-10 | 3375.61 | 3498.6  | 3245.65 | 2140.82 | 2170.13 | 1894.18 | Down |
| Prkg2    | 1085.88 | -0.9982 | 0.23691 | -4.2134 | 2.52E-05 | 0.00022  | 1424.16 | 1388.52 | 1528.77 | 758.876 | 951.479 | 463.49  | Down |
| Gm43251  | 25.809  | -1.8842 | 0.53703 | -3.5086 | 0.00045  | 0.00284  | 36.7651 | 29.706  | 55.3832 | 7.25701 | 12.6723 | 13.0702 | Down |
| Vamp9    | 32.2256 | -1.1203 | 0.42729 | -2.6218 | 0.00875  | 0.0342   | 35.7976 | 51.746  | 44.8795 | 24.8812 | 17.9524 | 18.0972 | Down |
| Hnrnpdl  | 11770   | -0.3484 | 0.08477 | -4.11   | 3.96E-05 | 0.00033  | 12827.1 | 12888.6 | 13837.2 | 9959.73 | 10816.9 | 10290.3 | Down |
| Coq2     | 3823.37 | -0.2264 | 0.10027 | -2.2581 | 0.02394  | 0.07697  | 3875.81 | 4524.9  | 3967.54 | 3560.08 | 3528.18 | 3483.71 | Down |
| Hpse     | 656.745 | 0.36086 | 0.15376 | 2.34695 | 0.01893  | 0.06397  | 519.548 | 675.572 | 529.96  | 788.941 | 708.593 | 717.856 | Up   |
| Abraxas1 | 516.186 | -0.3432 | 0.13037 | -2.6327 | 0.00847  | 0.03331  | 538.898 | 620.952 | 571.975 | 442.678 | 475.211 | 447.403 | Down |
| Arhgap24 | 1738.25 | -0.3151 | 0.13693 | -2.3012 | 0.02138  | 0.07026  | 1684.42 | 2146.5  | 1950.83 | 1511.53 | 1706.54 | 1429.68 | Down |
| Mapk10   | 529.541 | -4.7908 | 0.76416 | -6.2694 | 3.62E-10 | 8.64E-09 | 574.696 | 2048.76 | 443.066 | 34.2116 | 23.2326 | 53.2862 | Down |
| Slc10a6  | 2762.77 | -0.3171 | 0.1195  | -2.6538 | 0.00796  | 0.03168  | 2778.66 | 3005.1  | 3411.8  | 2643.63 | 2369.72 | 2367.72 | Down |
| Aff1     | 6596.98 | 0.35595 | 0.08324 | 4.27636 | 1.90E-05 | 0.00017  | 5912.4  | 5555.98 | 5893.54 | 7112.91 | 7421.75 | 7685.28 | Up   |
| Klhl8    | 641.794 | -0.345  | 0.14193 | -2.4308 | 0.01507  | 0.05324  | 717.886 | 734.984 | 701.839 | 507.991 | 5583.63 | 549.489 | Down |
| Hsd17b11 | 8927.89 | 0.62092 | 0.13577 | 4.5732  | 4.80E-06 | 5.10E-05 | 7866.75 | 6247.85 | 6992.61 | 10577.6 | 12205.5 | 9676.98 | Up   |
| Nudt9    | 3260.66 | 0.42395 | 0.10027 | 4.22829 | 2.35E-05 | 0.00021  | 2885.09 | 2740.62 | 2729.06 | 3824.44 | 3965.38 | 3419.37 | Up   |
| Spp1     | 32631.9 | 1.69907 | 0.21046 | 8.07292 | 6.86E-16 | 3.91E-14 | 19877.3 | 15180.7 | 11044.2 | 53726.8 | 54363.1 | 41599.5 | Up   |
| Pkd2     | 8246.48 | -0.409  | 0.10329 | -3.9599 | 7.50E-05 | 0.00059  | 10218.8 | 8938.64 | 9065.66 | 7253.9  | 7418.58 | 6583.36 | Down |
| Zfp951   | 187.512 | -0.5635 | 0.20204 | -2.789  | 0.00529  | 0.02271  | 218.655 | 204.109 | 248.27  | 129.589 | 161.572 | 162.875 | Down |
| Gm32051  | 9.24038 | -1.9611 | 0.83965 | -2.3357 | 0.01951  | 0.06552  | 9.67501 | 21.0817 | 13.3684 | 5.18358 | 2.11205 | 4.0216  | Down |
| Gm42141  | 27.6484 | 1.2588  | 0.58347 | 2.15744 | 0.03097  | 0.09399  | 5.80501 | 24.9147 | 18.1428 | 39.3952 | 46.4651 | 31.1674 | Up   |
| Lrrc8c   | 7178.54 | 0.93242 | 0.1503  | 6.20375 | 5.51E-10 | 1.27E-08 | 5368.67 | 4112.85 | 5327.29 | 8595.41 | 10787.3 | 8879.7  | Up   |
| Lrrc8d   | 2890.81 | 0.55208 | 0.11156 | 4.94878 | 7.47E-07 | 9.53E-06 | 2391.66 | 2295.03 | 2346.15 | 3305.05 | 3844.99 | 3161.99 | Up   |
| Cdc7     | 287.855 | -0.4794 | 0.19238 | -2.4919 | 0.01271  | 0.04646  | 307.665 | 313.351 | 384.818 | 209.417 | 233.382 | 278.496 | Down |
| Tgfb3    | 6030.57 | -0.933  | 0.07948 | -11.739 | 8.04E-32 | 1.83E-29 | 7725.5  | 7937.26 | 8083.08 | 4069.11 | 4310.7  | 4057.8  | Down |
| Brdt     | 257.966 | -0.5086 | 0.1945  | -2.6147 | 0.00893  | 0.03477  | 348.301 | 308.559 | 252.089 | 192.829 | 222.821 | 223.199 | Down |
| Lpcat2b  | 21.9729 | -1.5808 | 0.52738 | -2.9974 | 0.00272  | 0.01294  | 26.1225 | 30.6643 | 42.0148 | 13.4773 | 9.50423 | 10.054  | Down |
| Dipk1a   | 1365.31 | 0.4413  | 0.15756 | 2.80082 | 0.0051   | 0.02207  | 1225.82 | 1243.82 | 1004.54 | 1554.04 | 1817.42 | 1346.23 | Up   |
| Mtf2     | 310.065 | 0.41599 | 0.17321 | 2.40165 | 0.01632  | 0.05679  | 284.445 | 231.899 | 280.736 | 317.235 | 357.993 | 388.085 | Up   |
| Tmed5    | 5419.39 | 0.36623 | 0.12248 | 2.9901  | 0.00279  | 0.01322  | 4902.33 | 4769.25 | 4533.78 | 5672.91 | 7028.9  | 5609.13 | Up   |
| Gm43081  | 9.91287 | -1.9259 | 0.79938 | -2.4092 | 0.01599  | 0.05587  | 20.3175 | 8.62433 | 18.1428 | 4.14686 | 4.2241  | 4.0216  | Down |
| Gm42517  | 87.6954 | -0.8806 | 0.2667  | -3.3017 | 0.00096  | 0.0054   | 116.1   | 106.367 | 118.405 | 64.2764 | 70.7537 | 50.27   | Down |
| Gm10419  | 253.189 | -1.7743 | 0.19916 | -8.9091 | 5.15E-19 | 4.16E-17 | 417.961 | 370.846 | 386.728 | 90.1943 | 126.723 | 126.681 | Down |
| Pde6b    | 74.9005 | -0.663  | 0.2896  | -2.2893 | 0.02206  | 0.0721   | 88.0426 | 96.7841 | 90.7139 | 57.0194 | 46.4651 | 70.3781 | Down |
| Atp5k    | 258.872 | -0.5759 | 0.18284 | -3.1495 | 0.00164  | 0.00842  | 305.73  | 357.43  | 266.412 | 204.233 | 213.317 | 206.107 | Down |
| AC158912 | 49.0576 | 1.00171 | 0.44846 | 2.23368 | 0.0255   | 0.08092  | 45.4726 | 28.7478 | 23.8721 | 77.7537 | 39.0729 | 79.4267 | Up   |
| Mfsd7a   | 524.286 | 1.01716 | 0.14261 | 7.13237 | 9.87E-13 | 3.55E-11 | 391.838 | 312.392 | 336.119 | 678.012 | 706.481 | 720.872 | Up   |
| Gak      | 6424.31 | 0.4755  | 0.09995 | 4.75737 | 1.96E-06 | 2.26E-05 | 5706.32 | 5169.81 | 5248.99 | 7535.89 | 7967.71 | 6917.16 | Up   |
| Fgfr1l   | 1311.05 | -0.3498 | 0.15962 | -2.1913 | 0.02843  | 0.08824  | 1502.53 | 1679.83 | 1225.11 | 1227.47 | 1223.93 | 1007.41 | Down |
| Gm20629  | 84.5609 | -1.4662 | 0.31624 | -4.6364 | 3.55E-06 | 3.89E-05 | 131.58  | 122.657 | 118.405 | 31.1015 | 43.297  | 60.3241 | Down |
| Vmn2r10  | 13.117  | -2.2866 | 0.7723  | -2.9607 | 0.00307  | 0.01436  | 28.0575 | 10.5408 | 26.7367 | 3.11015 | 4.2241  | 6.03241 | Down |
| Vmn2r13  | 4.3434  | -3.5565 | 1.57143 | -2.2633 | 0.02362  | 0.07614  | 12.5775 | 3.83303 | 7.63906 | 0       | 0       | 2.0108  | Down |
| Crlf2    | 1223.72 | 0.86623 | 0.14897 | 5.81464 | 6.08E-09 | 1.15E-07 | 831.084 | 896.93  | 872.763 | 1573.73 | 1840.65 | 1327.13 | Up   |
| Zfp932   | 981.554 | -0.2453 | 0.11609 | -2.113  | 0.0346   | 0.10235  | 1087.47 | 987.006 | 1120.08 | 882.245 | 855.381 | 957.142 | Down |
| Plcx1d   | 38.1438 | 1.41312 | 0.445   | 3.17556 | 0.0015   | 0.00782  | 29.025  | 11.4991 | 21.9623 | 57.0194 | 58.0814 | 51.2754 | Up   |
| Zfp605   | 175.554 | 0.57345 | 0.2478  | 2.31416 | 0.02066  | 0.06841  | 136.418 | 110.2   | 176.653 | 217.71  | 233.382 | 178.961 | Up   |
| Chfr     | 639.585 | 0.50449 | 0.16803 | 3.00239 | 0.00268  | 0.01277  | 588.241 | 485.837 | 512.772 | 695.636 | 664.24  | 890.785 | Up   |
| Ankle2   | 2490.12 | 0.24617 | 0.11327 | 2.1733  | 0.02976  | 0.0913   | 2553.24 | 2102.42 | 2179.04 | 2681.98 | 2640.06 | 2783.96 | Up   |
| Pxmp2    | 444.574 | -0.5275 | 0.19094 | -2.7627 | 0.00573  | 0.02429  | 447.953 | 613.286 | 513.727 | 406.393 | 302.023 | 384.063 | Down |
| Pole     | 134.909 | 0.52871 | 0.23851 | 2.21667 | 0.02665  | 0.08376  | 129.645 | 100.617 | 101.218 | 166.911 | 134.115 | 176.951 | Up   |
| P2rx2    | 101.11  | 1.84098 | 0.39426 | 4.66945 | 3.02E-06 | 3.36E-05 | 27.09   | 69.9529 | 35.3307 | 119.222 | 171.076 | 183.988 | Up   |
| Lrcl1    | 48.338  | 2.67131 | 0.3949  | 6.76455 | 1.34E-11 | 4.11E-10 | 11.61   | 12.4574 | 15.2781 | 68.4232 | 89.7622 | 92.4969 | Up   |
| Galnt9   | 65.194  | -1.5322 | 0.4829  | -3.1729 | 0.00151  | 0.00788  | 155.7   |         |         |         |         |         |      |



|          |         |         |         |         |          |          |         |         |         |         |         |         |      |
|----------|---------|---------|---------|---------|----------|----------|---------|---------|---------|---------|---------|---------|------|
| Morn3    | 307.794 | -0.7475 | 0.20864 | -3.5827 | 0.00034  | 0.00221  | 357.008 | 379.47  | 421.103 | 235.334 | 176.356 | 277.491 | Down |
| Rhof     | 802.954 | 1.28841 | 0.16381 | 7.86545 | 3.68E-15 | 1.90E-13 | 523.418 | 385.22  | 490.81  | 1023.24 | 1261.95 | 1133.09 | Up   |
| Al480526 | 271.446 | -0.3883 | 0.17048 | -2.2773 | 0.02277  | 0.0739   | 280.575 | 299.935 | 342.803 | 222.894 | 228.101 | 254.366 | Down |
| Psmid9   | 1828.6  | -0.2297 | 0.09395 | -2.4448 | 0.01449  | 0.05163  | 1972.74 | 2044.92 | 1904.04 | 1738.57 | 1605.16 | 1706.17 | Down |
| Wdr66    | 2434.9  | -0.6488 | 0.21036 | -3.0841 | 0.00204  | 0.01013  | 2616.12 | 3260.95 | 3043.21 | 2029.89 | 1311.58 | 2347.61 | Down |
| Bcl7a    | 1796.03 | -0.6313 | 0.09091 | -6.9448 | 3.79E-12 | 1.24E-10 | 2213.64 | 2163.75 | 2171.4  | 1412.01 | 1347.49 | 1467.89 | Down |
| Lrrc43   | 710.601 | -0.6894 | 0.21512 | -3.2046 | 0.00135  | 0.00719  | 870.751 | 902.68  | 858.44  | 610.626 | 369.609 | 651.5   | Down |
| Gm15751  | 111.155 | -1.1857 | 0.30381 | -3.9028 | 9.51E-05 | 0.00073  | 125.775 | 153.321 | 184.292 | 72.5701 | 47.5211 | 83.4483 | Down |
| Vps33a   | 2197.56 | 0.20446 | 0.0962  | 2.12542 | 0.03355  | 0.09988  | 2175.91 | 1910.77 | 2039.63 | 2381.34 | 2361.27 | 2316.44 | Up   |
| Kntc1    | 105.954 | 1.39901 | 0.27406 | 5.1048  | 3.31E-07 | 4.53E-06 | 60.9526 | 66.1198 | 47.7441 | 179.352 | 126.723 | 154.832 | Up   |
| Hcar2    | 710.094 | 0.73089 | 0.26142 | 2.79582 | 0.00518  | 0.02233  | 591.143 | 680.364 | 330.389 | 806.565 | 1051.8  | 800.299 | Up   |
| Ccdc62   | 637.604 | -0.6083 | 0.19262 | -3.1578 | 0.00159  | 0.00822  | 700.471 | 803.021 | 806.876 | 572.267 | 375.945 | 567.046 | Down |
| Hip1r    | 4732.6  | 0.22821 | 0.10252 | 2.22598 | 0.02602  | 0.08219  | 4071.25 | 4195.26 | 4810.7  | 5003.19 | 5092.15 | 5223.06 | Up   |
| Cdk2ap1  | 2707.44 | -0.2882 | 0.11393 | -2.5294 | 0.01142  | 0.04267  | 2709.97 | 2891.07 | 3329.68 | 2421.77 | 2514.4  | 2377.77 | Down |
| Kmt5a    | 5080.66 | 0.41633 | 0.09864 | 4.22081 | 2.43E-05 | 0.00022  | 4331.5  | 4448.24 | 4277.88 | 5977.7  | 6169.3  | 5279.36 | Up   |
| Rilp2    | 1359.51 | 0.52078 | 0.12105 | 4.30215 | 1.69E-05 | 0.00016  | 1209.38 | 1071.33 | 1069.47 | 1595.51 | 1743.5  | 1467.89 | Up   |
| Rilp1    | 2294.85 | -0.5716 | 0.12654 | -4.5175 | 6.26E-06 | 6.46E-05 | 2427.46 | 3133.51 | 2669.85 | 1898.23 | 1856.49 | 1783.58 | Down |
| Tmed2    | 9479.34 | 0.24396 | 0.07435 | 3.28098 | 0.00103  | 0.00573  | 8547.88 | 8871.56 | 8619.73 | 10392   | 10465.2 | 9979.61 | Up   |
| Eif2b1   | 1893.24 | 0.21866 | 0.10034 | 2.17928 | 0.02931  | 0.09031  | 1739.57 | 1735.41 | 1775.13 | 2205.09 | 1934.64 | 1969.58 | Up   |
| Atp6v0a2 | 1740.86 | 0.61701 | 0.09949 | 6.20148 | 5.59E-10 | 1.28E-08 | 1398.04 | 1438.35 | 1286.23 | 2205.81 | 2071.92 | 2194.79 | Up   |
| Dnah10   | 3681.53 | -0.617  | 0.18826 | -3.2776 | 0.00105  | 0.00579  | 4017.07 | 4678.22 | 4676.06 | 3147.47 | 2106.77 | 3463.61 | Down |
| Rflna    | 162.737 | -0.6028 | 0.28773 | -2.0952 | 0.03616  | 0.10596  | 141.255 | 177.728 | 270.232 | 119.222 | 125.667 | 142.767 | Down |
| Scarb1   | 4640.75 | 0.46235 | 0.14248 | 3.24495 | 0.00117  | 0.00638  | 4491.14 | 3564.72 | 3456.34 | 4865.31 | 6112.27 | 5156.7  | Up   |
| Bri3bp   | 795.743 | 0.29511 | 0.13594 | 2.17096 | 0.02993  | 0.09169  | 756.586 | 764.69  | 622.584 | 895.722 | 913.462 | 821.413 | Up   |
| Aacs     | 2571.35 | 0.67554 | 0.12488 | 5.40974 | 6.31E-08 | 9.75E-07 | 1865.34 | 2272.99 | 1801.86 | 3221.08 | 3253.61 | 3013.19 | Up   |
| Gm42953  | 4.31168 | 2.99059 | 1.45235 | 2.05913 | 0.03948  | 0.11337  | 1.935   | 0.95826 | 0       | 8.29373 | 12.6723 | 2.0108  | Down |
| Tmem132  | 461.605 | -0.981  | 0.207   | -4.7394 | 2.14E-06 | 2.46E-05 | 703.374 | 468.588 | 666.508 | 315.162 | 266.118 | 349.88  | Down |
| Adgrd1   | 569.888 | -0.7126 | 0.22958 | -3.1039 | 0.00191  | 0.00959  | 608.558 | 928.553 | 586.298 | 507.991 | 434.026 | 353.901 | Down |
| Mmp17    | 114.112 | -0.6397 | 0.2551  | -2.5077 | 0.01215  | 0.04483  | 166.41  | 113.075 | 137.503 | 87.0841 | 97.1543 | 83.4483 | Down |
| Zfp11    | 429.422 | -0.306  | 0.15448 | -1.9808 | 0.04761  | 0.1314   | 446.018 | 474.338 | 504.178 | 396.025 | 333.704 | 422.268 | Down |
| Mpr17    | 3930.51 | -0.3185 | 0.11158 | -2.8549 | 0.00431  | 0.01912  | 4055.77 | 4399.37 | 4633.09 | 366.93  | 3154.35 | 3643.57 | Down |
| Nipsnap2 | 6086.73 | -0.5422 | 0.17851 | -3.0374 | 0.00239  | 0.01157  | 6593.52 | 9168.62 | 5889.72 | 5171.14 | 4409.96 | 5287.4  | Down |
| Phkg1    | 268.523 | -2.3462 | 0.40363 | -5.8128 | 6.14E-09 | 1.16E-07 | 302.828 | 780.981 | 262.593 | 99.5247 | 69.6977 | 95.5131 | Down |
| Zbed5    | 298.389 | -0.588  | 0.16679 | -3.5255 | 0.00042  | 0.00268  | 339.593 | 345.931 | 389.592 | 266.436 | 217.541 | 231.242 | Down |
| Nupr1l   | 115.155 | -0.7825 | 0.24131 | -3.2426 | 0.00118  | 0.00642  | 148.995 | 139.906 | 148.007 | 102.635 | 74.9778 | 76.4105 | Down |
| Vkorc11l | 3299.91 | 0.31313 | 0.10333 | 3.03024 | 0.00244  | 0.01181  | 3110.52 | 2749.24 | 2969.69 | 3546.6  | 3932.64 | 3490.75 | Up   |
| Gusb     | 4919.18 | 1.19895 | 0.11116 | 10.7861 | 4.00E-27 | 6.70E-25 | 3271.12 | 2986.89 | 2697.54 | 6638.09 | 7290.8  | 6630.62 | Up   |
| Asl      | 1384.74 | 0.36729 | 0.10122 | 3.62852 | 0.00029  | 0.0019   | 1245.17 | 1241.9  | 1141.09 | 1541.6  | 1631.56 | 1507.1  | Up   |
| Tp1st1   | 2319.92 | -0.505  | 0.09557 | -5.2841 | 1.26E-07 | 1.84E-06 | 2841.55 | 2552.8  | 2771.07 | 1927.25 | 1977.94 | 1848.93 | Down |
| Tmem248  | 5795.26 | 0.24894 | 0.08299 | 2.99974 | 0.0027   | 0.01285  | 5290.3  | 5148.72 | 5450.47 | 6594.55 | 6113.33 | 6174.17 | Up   |
| Sbds     | 7223.43 | -0.2047 | 0.09156 | -2.2356 | 0.02538  | 0.08062  | 8067.03 | 7124.65 | 8013.38 | 6618.39 | 6848.32 | 6668.82 | Down |
| Tywl     | 978.545 | 0.32988 | 0.16333 | 2.01973 | 0.04341  | 0.12222  | 1050.71 | 832.727 | 718.072 | 1114.47 | 1105.66 | 1049.64 | Up   |
| Castor2  | 1613.91 | -0.4238 | 0.12238 | -3.4631 | 0.00053  | 0.00328  | 1632.17 | 2041.09 | 1874.44 | 1398.53 | 1416.13 | 1321.1  | Down |
| Ncf1     | 324.633 | 2.2379  | 0.37236 | 6.01001 | 1.86E-09 | 3.86E-08 | 185.76  | 77.619  | 77.3455 | 484.146 | 731.826 | 391.101 | Up   |
| Syna     | 42.5405 | -1.0681 | 0.37008 | -2.8862 | 0.0039   | 0.01759  | 62.8876 | 48.8712 | 61.1125 | 29.028  | 22.1765 | 31.1674 | Down |
| Rfc2     | 3244.11 | -0.2582 | 0.10488 | -2.4623 | 0.01381  | 0.04975  | 3370.78 | 3518.73 | 3711.63 | 3181.68 | 2711.87 | 2969.95 | Down |
| Lat2     | 285.539 | 0.36227 | 0.1561  | 2.32075 | 0.0203   | 0.0675   | 230.265 | 249.147 | 270.232 | 318.272 | 311.527 | 333.793 | Up   |
| Eln      | 5777.6  | -1.3527 | 0.44147 | -3.0641 | 0.00218  | 0.01072  | 4101.24 | 11478   | 9332.07 | 3415.98 | 4031.9  | 2306.39 | Down |
| Cldn4    | 1152.28 | 2.36543 | 0.184   | 12.8555 | 8.01E-38 | 3.32E-35 | 385.066 | 405.343 | 333.254 | 2353.34 | 1535.46 | 1901.21 | Up   |
| Cldn3    | 10103.6 | 0.407   | 0.12124 | 3.35714 | 0.00079  | 0.00456  | 8443.39 | 9045.96 | 8573.89 | 12867.7 | 11749.3 | 9941.4  | Up   |
| Abhd11   | 1807.1  | 0.28316 | 0.09737 | 2.90811 | 0.00364  | 0.01658  | 1584.77 | 1689.41 | 1616.62 | 2054.77 | 2036.02 | 1861    | Up   |
| Mxipl    | 257.267 | -2.4725 | 0.34294 | -7.2097 | 5.61E-13 | 2.12E-11 | 318.308 | 674.614 | 315.111 | 72.5701 | 65.4736 | 97.5239 | Down |
| Nsun5    | 708.519 | -0.308  | 0.11582 | -2.6598 | 0.00782  | 0.03119  | 814.636 | 738.817 | 798.282 | 644.837 | 604.047 | 650.494 | Down |
| Ccl24    | 34.1809 | -2.5396 | 0.62716 | -4.0494 | 5.14E-05 | 0.00042  | 65.7901 | 81.452  | 27.6916 | 14.514  | 11.6163 | 4.0216  | Down |
| Gm43091  | 117.999 | -1.1411 | 0.32956 | -3.4624 | 0.00054  | 0.00328  | 119.97  | 171.528 | 195.751 | 66.3498 | 53.8573 | 100.54  | Down |
| Por      | 23339.6 | -0.4074 | 0.17476 | -2.3309 | 0.01976  | 0.06616  | 27197.4 | 29039.1 | 23602.8 | 21672.5 | 15163.5 | 23362.5 | Down |
| Stylx1   | 300.303 | -0.6342 | 0.25339 | -2.5029 | 0.01232  | 0.04535  | 387.001 | 404.385 | 304.608 | 240.518 | 163.684 | 301.62  | Down |
| Mdh2     | 9633.01 | -0.3964 | 0.18146 | -2.1845 | 0.02893  | 0.08943  | 9474.74 | 14280   | 9089.53 | 8722.93 | 8446.09 | 7784.82 | Down |
| Srrm3    | 7.70874 | -3.7831 | 1.39478 | -2.7123 | 0.00668  | 0.02743  | 3.87001 | 18.2069 | 21.0074 | 0       | 3.16808 | 0       | Down |
| Hspb1    | 6506.16 | -0.8242 | 0.17659 | -4.6671 | 3.05E-06 | 3.39E-05 | 7182.73 | 7661.28 | 10102.7 | 5121.38 | 5153.4  | 3815.5  | Down |
| Ywhag    | 8296.4  | 0.20747 | 0.09341 | 2.2211  | 0.02634  | 0.08304  | 7860.95 | 7770.52 | 7471    | 8366.3  | 9610.89 | 8698.73 | Up   |
| Rasa4    | 1100.38 | -0.6061 | 0.15172 | -3.9952 | 6.46E-05 | 0.00052  | 1151.33 | 1337.73 | 1495.35 | 970.366 | 873.333 | 774.159 | Down |
| Lrwd1    | 1688.88 | -0.3122 | 0.11852 | -2.634  | 0.00844  | 0.03321  | 1828.58 | 1887.77 | 1896.4  | 1686.74 | 1353.82 | 1479.95 | Down |
| Orai2    | 1536.94 | 0.83208 | 0.11131 | 7.4751  | 7.71E-14 | 3.36E-12 | 1081.67 | 1016.71 | 1218.43 | 1998.79 | 1930.41 | 1975.61 | Up   |
| Sh2b2    | 330.826 | 0.99856 | 0.2235  | 4.46779 | 7.90E-06 | 7.96E-05 | 255.42  | 220.399 | 186.202 | 429.2   | 543.853 | 349.88  | Up   |
| Cux1     | 4648.19 | 0.22675 | 0.0968  | 2.34257 | 0.01915  | 0.06455  | 4465.99 | 4338.04 | 4046.79 | 5175.29 | 5201.98 | 4661.04 | Up   |
| Col26a1  | 84.7577 | -0.8064 | 0.31295 | -2.5768 | 0.00997  | 0.03813  | 115.133 | 109.241 | 99.3078 | 60.1295 | 43.297  | 81.4375 | Down |
| 4933404C | 211.849 | -0.5213 | 0.18395 | -2.8337 | 0.0046   | 0.02022  | 277.673 | 222.316 | 249.224 | 172.095 | 165.796 | 183.988 | Down |
| Plod3    | 5591.32 | 0.60943 | 0.12101 | 5.03621 | 4.75E-07 | 6.28E-06 | 4660.45 | 4225.92 | 4396.28 | 6628.76 | 7639.29 | 5997.22 | Up   |
| Ap1s1    | 3902.21 | 0.51173 | 0.11227 | 4.5581  | 5.16E-06 | 5.44E-05 | 3374.65 | 3165.13 | 3111.96 | 4717.06 | 4968.6  | 4075.9  | Up   |
| Serpine1 | 1990.22 | 0.61772 | 0.2027  | 3.0475  | 0.00231  | 0.01123  | 1634.11 | 1833.15 | 1244.21 | 2328.46 | 2979.05 | 1922.33 | Up   |
| CAAA010  | 175.14  | 4.9646  | 1.5647  | 3.17288 | 0.00151  | 0.00788  | 2.9025  | 29.706  | 0       | 337.969 | 180.58  | 499.684 | Up   |
| Slc12a9  | 1013.97 | 0.27069 | 0.12486 | 2.168   | 0.03016  | 0.09217  | 972.339 | 874.89  | 910.003 | 1062.63 | 1233.44 | 1030.54 | Up   |
| Ephb4    | 7070.03 | -0.3976 | 0.14446 | -2.7523 | 0.00592  | 0.02491  | 8019.62 | 7056.62 | 9037.97 | 6302.2  | 6780.74 | 5223.06 | Down |
| Zan      | 72.2878 | -0.6822 | 0.30443 | -2.2408 | 0.02504  | 0.0798   | 107.393 | 84.3268 | 75.4357 | 60.1295 | 60.1934 | 46.2484 | Down |
| Tfr2     | 47.4809 | 1.38911 | 0.33808 | 4.10883 | 3.98E-05 | 0.00033  | 26.1225 | 25.873  | 26.7367 | 67.3865 | 63.3615 | 75.4051 | Up   |
| Pcolce   | 7301.65 | -0.2032 | 0.09123 | -2.2271 | 0.02594  | 0.08204  | 7485.56 | 7891.26 | 8067.81 | 7194.81 | 6789.19 |         |      |





|           |         |         |         |         |          |          |         |         |         |         |         |         |      |
|-----------|---------|---------|---------|---------|----------|----------|---------|---------|---------|---------|---------|---------|------|
| Tcaf3     | 7.8745  | -4.4699 | 1.64691 | -2.7141 | 0.00665  | 0.0273   | 27.09   | 0.95826 | 17.1879 | 0       | 0       | 2.0108  | Down |
| Arhgef5   | 3971.02 | 0.22915 | 0.09288 | 2.46718 | 0.01362  | 0.04919  | 3853.56 | 3397.03 | 3718.31 | 4319.99 | 4369.83 | 4167.39 | Up   |
| Tpk1      | 778.122 | 0.48099 | 0.11234 | 4.28175 | 1.85E-05 | 0.00017  | 614.363 | 663.115 | 671.283 | 947.558 | 878.613 | 893.801 | Up   |
| Cntnap2   | 77.7308 | 0.73845 | 0.27579 | 2.67761 | 0.00741  | 0.02989  | 55.1476 | 65.1616 | 54.4283 | 104.708 | 103.49  | 83.4483 | Up   |
| Pdia4     | 7166.53 | 0.50315 | 0.08655 | 5.81358 | 6.12E-09 | 1.16E-07 | 5741.15 | 5721.76 | 6325.14 | 8453.38 | 8214.82 | 8542.89 | Up   |
| Zfp783    | 187.78  | -0.544  | 0.20558 | -2.6462 | 0.00814  | 0.03229  | 234.135 | 230.94  | 203.39  | 139.957 | 137.283 | 180.972 | Down |
| Zfp956    | 766.187 | -0.3023 | 0.11941 | -2.532  | 0.01134  | 0.04239  | 844.629 | 839.435 | 854.62  | 724.664 | 620.943 | 712.829 | Down |
| Zfp467    | 3004.43 | 0.35121 | 0.1033  | 3.39982 | 0.00067  | 0.004    | 2721.58 | 2696.54 | 2503.7  | 3288.46 | 3159.63 | 3656.64 | Up   |
| Zfp862-ps | 689.918 | -0.3949 | 0.13484 | -2.9287 | 0.0034   | 0.01569  | 770.131 | 835.602 | 745.764 | 573.304 | 549.133 | 665.575 | Down |
| Atp6v0e2  | 1951.5  | -0.4732 | 0.12945 | -3.6558 | 0.00026  | 0.00172  | 2205.9  | 2392.77 | 2207.69 | 1812.18 | 1402.4  | 1688.07 | Down |
| Rarres2   | 3239.87 | -0.5184 | 0.16083 | -3.223  | 0.00127  | 0.00682  | 4659.49 | 3366.36 | 3421.35 | 2921.47 | 2670.69 | 2399.89 | Down |
| Gm28053   | 109.438 | -0.658  | 0.29642 | -2.2197 | 0.02644  | 0.08327  | 94.8151 | 166.737 | 140.368 | 73.6068 | 86.5941 | 94.5077 | Down |
| 4833403J1 | 121.631 | -0.6227 | 0.25954 | -2.3992 | 0.01643  | 0.05711  | 124.808 | 153.321 | 164.24  | 77.7537 | 116.163 | 93.5023 | Down |
| Gimap3    | 2114.39 | -0.5766 | 0.10276 | -5.6113 | 2.01E-08 | 3.41E-07 | 2674.17 | 2330.49 | 2589.64 | 1629.72 | 1713.93 | 1748.39 | Down |
| Tmem176   | 27372.9 | 0.45834 | 0.11619 | 3.94478 | 7.99E-05 | 0.00062  | 21913.9 | 24548.7 | 22720.5 | 33079.5 | 27705.9 | 34269.1 | Up   |
| Tmem176   | 28008.4 | 0.61006 | 0.12029 | 5.07159 | 3.95E-07 | 5.31E-06 | 22089   | 22834.3 | 21596.6 | 35117.7 | 28965.7 | 37447.2 | Up   |
| Gpnmnb    | 4247.16 | 2.98722 | 0.57375 | 5.20646 | 1.92E-07 | 2.73E-06 | 1622.5  | 681.322 | 550.013 | 7066.26 | 10093.5 | 5469.38 | Up   |
| Gm19253   | 8.79588 | 4.11393 | 1.18051 | 3.48489 | 0.00049  | 0.00306  | 0.9675  | 0       | 1.90977 | 20.7343 | 21.1205 | 8.04321 | Up   |
| Igf2bp3   | 304.554 | -0.9921 | 0.20825 | -4.7639 | 1.90E-06 | 2.20E-05 | 383.131 | 382.345 | 450.705 | 173.132 | 181.636 | 256.377 | Down |
| Cycs      | 3692.73 | -0.4929 | 0.19917 | -2.4748 | 0.01333  | 0.04833  | 3377.55 | 5767.76 | 3807.12 | 3088.38 | 3266.29 | 2849.31 | Down |
| C530044C  | 12.3288 | -1.7008 | 0.8281  | -2.0538 | 0.03999  | 0.11452  | 13.545  | 28.7478 | 14.3232 | 2.07343 | 4.2241  | 11.0594 | Down |
| Nfe2l3    | 431.037 | -0.5519 | 0.22616 | -2.4405 | 0.01467  | 0.05209  | 446.986 | 576.872 | 513.727 | 433.347 | 251.334 | 363.955 | Down |
| Snx10     | 2331.36 | 1.14722 | 0.18406 | 6.23271 | 4.58E-10 | 1.07E-08 | 1677.65 | 1551.42 | 1121.99 | 2962.93 | 3781.63 | 2992.54 | Up   |
| Skap2     | 6643.97 | 0.42983 | 0.08074 | 5.32347 | 1.02E-07 | 1.51E-06 | 5757.6  | 5486.03 | 5740.76 | 7462.28 | 7956.1  | 7461.08 | Up   |
| Hoxa1     | 79.4462 | -0.8065 | 0.40801 | -1.9767 | 0.04808  | 0.13238  | 73.5301 | 131.281 | 98.3529 | 68.4232 | 73.9218 | 31.1674 | Down |
| Hotairm1  | 233.064 | -0.4324 | 0.21032 | -2.056  | 0.03978  | 0.11401  | 222.525 | 306.643 | 274.051 | 167.948 | 208.037 | 219.177 | Down |
| Gm27477   | 41.2901 | -1.156  | 0.40564 | -2.8498 | 0.00437  | 0.01937  | 56.1151 | 58.4538 | 56.3381 | 26.9546 | 33.7928 | 16.0864 | Down |
| Hoxa7     | 315.776 | -0.7338 | 0.29814 | -2.4614 | 0.01384  | 0.04984  | 438.278 | 275.978 | 468.847 | 316.198 | 235.494 | 159.859 | Down |
| Tril      | 712.016 | -1.1312 | 0.23253 | -4.8648 | 1.15E-06 | 1.39E-05 | 1041.03 | 852.85  | 1038.91 | 488.293 | 554.413 | 296.593 | Down |
| Fkbp14    | 1720.33 | -0.5743 | 0.20772 | -2.7649 | 0.00569  | 0.02415  | 1410.62 | 2549.93 | 2214.37 | 1426.52 | 1341.15 | 1379.41 | Down |
| Mturn     | 2288.44 | -0.5853 | 0.12239 | -4.7826 | 1.73E-06 | 2.02E-05 | 3110.52 | 2443.56 | 2685.13 | 1868.16 | 1841.71 | 1781.57 | Down |
| Znrf2     | 4068.39 | 0.34484 | 0.11315 | 3.04769 | 0.00231  | 0.01123  | 3883.55 | 3641.38 | 3228.46 | 4282.67 | 4864.05 | 4510.23 | Up   |
| Crhr2     | 65.5083 | -4.1737 | 0.66924 | -6.2364 | 4.48E-10 | 1.05E-08 | 81.2701 | 245.314 | 45.8344 | 7.25701 | 6.33615 | 7.03781 | Down |
| Inmt      | 79733.4 | -1.2481 | 0.15448 | -8.0795 | 6.50E-16 | 3.74E-14 | 122568  | 98016.4 | 116078  | 48686.2 | 54365.2 | 38685.8 | Down |
| Mindy4    | 639.679 | -0.4237 | 0.13355 | -3.1728 | 0.00151  | 0.00788  | 822.376 | 695.696 | 680.832 | 558.79  | 536.461 | 543.922 | Down |
| Adcyap1r  | 325.962 | -0.735  | 0.25317 | -2.9033 | 0.00369  | 0.01679  | 506.003 | 446.549 | 269.277 | 240.518 | 225.989 | 267.437 | Down |
| Pde1c     | 346.718 | 1.07579 | 0.33503 | 3.21101 | 0.00132  | 0.00707  | 130.613 | 330.599 | 208.164 | 354.557 | 455.147 | 601.23  | Up   |
| Gm10209   | 14.9751 | -1.7487 | 0.67241 | -2.6007 | 0.0093   | 0.03601  | 34.8301 | 18.2069 | 16.233  | 7.25701 | 5.28013 | 8.04321 | Down |
| Fkbp9     | 8749.34 | -0.2702 | 0.10046 | -2.6895 | 0.00716  | 0.02903  | 10258.4 | 9589.29 | 8850.81 | 8105.04 | 8246.5  | 7446    | Down |
| Herc6     | 1006.49 | 0.40216 | 0.13684 | 2.93898 | 0.00329  | 0.01524  | 908.484 | 794.396 | 898.545 | 1003.54 | 1172.19 | 1261.78 | Up   |
| Vopp1     | 2215.58 | 0.26296 | 0.10596 | 2.48163 | 0.01308  | 0.04756  | 1989.18 | 1861.9  | 2191.46 | 2443.54 | 2486.94 | 2320.47 | Up   |
| Abcg2     | 1942.78 | -0.313  | 0.14907 | -2.0996 | 0.03576  | 0.10503  | 2563.88 | 1947.18 | 1947.01 | 1648.38 | 1891.34 | 1658.91 | Down |
| Fam13a    | 3702.93 | -1.0342 | 0.19143 | -5.4026 | 6.57E-08 | 1.01E-06 | 4837.51 | 5126.68 | 4964.44 | 2584.53 | 1723.43 | 2981.01 | Down |
| Tigd2     | 1367.49 | 0.59049 | 0.11602 | 5.08949 | 3.59E-07 | 4.87E-06 | 1185.19 | 1046.42 | 1042.73 | 1641.12 | 1757.23 | 1532.23 | Up   |
| Snca      | 503.328 | -0.995  | 0.31318 | -3.1772 | 0.00149  | 0.00778  | 1015.88 | 560.581 | 434.472 | 325.529 | 416.074 | 267.437 | Down |
| A730020E  | 216.395 | -0.4194 | 0.20051 | -2.0915 | 0.03648  | 0.10671  | 222.525 | 282.686 | 237.766 | 194.903 | 158.404 | 202.086 | Down |
| Hpgds     | 339.461 | 1.8819  | 0.31128 | 6.04578 | 1.49E-09 | 3.19E-08 | 203.175 | 146.614 | 84.9846 | 560.863 | 409.738 | 631.392 | Up   |
| Tnlp3     | 287.359 | 2.28936 | 0.19258 | 11.8877 | 1.37E-32 | 3.40E-30 | 86.1076 | 116.908 | 89.759  | 520.431 | 462.539 | 448.409 | Up   |
| Ndnf      | 10573.6 | 1.23343 | 0.13504 | 9.13386 | 6.61E-20 | 5.66E-18 | 7056.96 | 5900    | 5973.75 | 13507.4 | 17072.8 | 13930.8 | Up   |
| Prdm5     | 489.455 | -0.6009 | 0.18273 | -3.2883 | 0.00101  | 0.00562  | 488.588 | 708.153 | 572.93  | 401.209 | 413.962 | 351.89  | Down |
| 2610300M  | 18.1324 | 2.49988 | 0.76323 | 3.27539 | 0.00106  | 0.00583  | 8.70751 | 4.79129 | 2.86465 | 12.4406 | 32.7368 | 47.2538 | Up   |
| Gng12     | 6596.33 | 0.41176 | 0.09152 | 4.49924 | 6.82E-06 | 7.00E-05 | 6102.03 | 5501.36 | 5380.77 | 7554.55 | 7350.99 | 7688.3  | Up   |
| Gadd45a   | 643.625 | 0.72317 | 0.23482 | 3.07964 | 0.00207  | 0.01026  | 405.383 | 554.832 | 496.539 | 1078.18 | 706.481 | 620.332 | Up   |
| A430010J  | 6.65316 | -1.9375 | 0.93878 | -2.0638 | 0.03903  | 0.11235  | 7.74001 | 10.5408 | 13.3684 | 4.14686 | 2.11205 | 2.0108  | Down |
| Gm42889   | 46.094  | 1.47698 | 0.43165 | 3.42171 | 0.00062  | 0.00373  | 37.7326 | 16.2904 | 19.0977 | 59.0928 | 74.9778 | 69.3727 | Up   |
| Igkv1-133 | 78.413  | 4.88811 | 0.83488 | 5.85485 | 4.77E-09 | 9.30E-08 | 5.80501 | 6.70781 | 2.86465 | 126.479 | 17.9524 | 310.669 | Up   |
| Igkv14-12 | 112.47  | 1.66049 | 0.60884 | 2.72731 | 0.00639  | 0.0265   | 48.3751 | 45.0382 | 68.7516 | 355.594 | 46.4651 | 110.594 | Up   |
| Igkv17-12 | 65.2941 | 1.52878 | 0.55091 | 2.77502 | 0.00552  | 0.02355  | 30.96   | 43.1216 | 26.7367 | 183.499 | 60.1934 | 47.2538 | Up   |
| Igkv9-120 | 88.1714 | 1.61693 | 0.56541 | 2.85978 | 0.00424  | 0.01887  | 80.3026 | 35.4556 | 14.3232 | 116.112 | 195.365 | 87.4699 | Up   |
| Igkv1-117 | 427.646 | 2.95862 | 0.75462 | 3.92067 | 8.83E-05 | 0.00068  | 144.158 | 87.2015 | 61.1125 | 337.969 | 420.298 | 1515.14 | Up   |
| Igkv14-11 | 70.0729 | 1.39335 | 0.47832 | 2.91302 | 0.00358  | 0.01636  | 21.285  | 26.8312 | 67.7967 | 111.965 | 73.9218 | 118.637 | Up   |
| Igkv1-110 | 442.059 | 3.05081 | 0.93167 | 3.27456 | 0.00106  | 0.00584  | 135.45  | 67.0781 | 83.0748 | 317.235 | 1814.25 | 235.264 | Up   |
| Igkv16-10 | 51.5354 | 1.71755 | 0.68752 | 2.49818 | 0.01248  | 0.04582  | 29.025  | 29.706  | 13.3684 | 168.985 | 36.9609 | 31.1674 | Up   |
| Igkv10-96 | 166.347 | 2.4212  | 0.92211 | 2.62571 | 0.00865  | 0.03389  | 96.7501 | 34.4973 | 25.7818 | 317.235 | 461.483 | 62.3349 | Up   |
| Igkv10-94 | 36.3072 | 1.51144 | 0.64435 | 2.34569 | 0.01899  | 0.06413  | 11.61   | 29.706  | 15.2781 | 29.028  | 31.6808 | 100.54  | Up   |
| Igkv19-93 | 56.4805 | 1.0113  | 0.41724 | 2.42377 | 0.01536  | 0.05408  | 38.7001 | 37.3721 | 36.2855 | 116.112 | 59.1374 | 51.2754 | Up   |
| Igkv4-91  | 110.586 | 2.25171 | 0.46344 | 4.85874 | 1.18E-06 | 1.43E-05 | 38.7001 | 22.9982 | 53.4734 | 128.553 | 116.163 | 303.631 | Up   |
| Igkv12-89 | 259.111 | 3.1878  | 0.46723 | 6.82277 | 8.93E-12 | 2.82E-10 | 67.7251 | 20.1234 | 65.8869 | 406.393 | 738.162 | 256.377 | Up   |
| Igkv1-88  | 40.4197 | 3.7025  | 0.6295  | 5.88161 | 4.06E-09 | 8.05E-08 | 9.67501 | 3.83303 | 3.81953 | 70.4967 | 39.0729 | 115.621 | Up   |
| Igkv4-86  | 74.8569 | 4.20775 | 1.8879  | 2.2288  | 0.02583  | 0.08172  | 7.74001 | 11.4991 | 3.81953 | 313.088 | 112.995 | 0       | Up   |
| Igkv13-84 | 16.2986 | 3.04393 | 0.74057 | 4.11027 | 3.95E-05 | 0.00033  | 4.83751 | 1.91652 | 3.81953 | 22.8077 | 43.297  | 21.1134 | Up   |
| Igkv4-79  | 125.212 | 4.4164  | 1.41756 | 3.11549 | 0.00184  | 0.00927  | 9.67501 | 18.2069 | 5.7293  | 76.717  | 10.5603 | 630.386 | Up   |
| Igkv4-70  | 69.4571 | 2.40437 | 0.79372 | 3.02925 | 0.00245  | 0.01184  | 14.5125 | 41.2051 | 10.5037 | 165.875 | 13.7283 | 170.918 | Up   |
| Igkv4-69  | 15.1991 | 2.6543  | 1.16396 | 2.28041 | 0.02258  | 0.07336  | 5.80501 | 3.83303 | 2.86465 | 70.4967 | 3.16808 | 5.027   | Up   |
| Igkv4-58  | 20.6692 | 2.44677 | 0.90527 | 2.70282 | 0.00688  | 0.02811  | 7.74001 | 2.87478 | 8.59395 | 15.5507 | 79.2019 | 10.054  | Up   |
| Igkv4-50  | 30.025  | 1.98018 | 0.90314 | 2.19254 | 0.02834  | 0.08806  | 1.935   | 30.6643 | 3.81953 | 79.8271 | 32.7368 | 31.1    |      |

|            |         |         |         |         |          |          |         |         |         |         |         |         |      |
|------------|---------|---------|---------|---------|----------|----------|---------|---------|---------|---------|---------|---------|------|
| Igkv6-25   | 129.223 | 3.94989 | 1.29668 | 3.04614 | 0.00232  | 0.01127  | 23.22   | 10.5408 | 13.3684 | 25.9179 | 52.8013 | 649.489 | Up   |
| Igkv8-24   | 47.7944 | 1.96455 | 0.53033 | 3.70438 | 0.00021  | 0.00146  | 16.4475 | 12.4574 | 29.6014 | 62.203  | 45.4091 | 120.648 | Up   |
| Igkv8-19   | 42.3669 | 2.25371 | 0.85475 | 2.6367  | 0.00837  | 0.033    | 9.67501 | 5.74955 | 28.6465 | 19.6976 | 29.5687 | 160.864 | Up   |
| Igkv6-17   | 76.1644 | 1.48513 | 0.55179 | 2.69145 | 0.00711  | 0.02892  | 66.7576 | 29.706  | 23.8721 | 57.0194 | 86.5941 | 193.037 | Up   |
| Igkv6-13   | 25.6719 | 2.43661 | 0.70675 | 3.44762 | 0.00057  | 0.00344  | 6.77251 | 12.4574 | 4.77441 | 65.3131 | 49.6332 | 15.081  | Up   |
| Igkv3-10   | 35.0124 | 1.71594 | 0.7381  | 2.3248  | 0.02008  | 0.06702  | 18.3825 | 18.2069 | 12.4135 | 59.0928 | 92.9302 | 9.04861 | Up   |
| Igkv3-5    | 112.125 | 4.00348 | 1.16689 | 3.4309  | 0.0006   | 0.00362  | 25.155  | 3.83303 | 10.5037 | 503.844 | 57.0254 | 72.3889 | Up   |
| Igkv3-4    | 68.2151 | 1.60901 | 0.74139 | 2.17025 | 0.02999  | 0.09177  | 53.2126 | 26.8312 | 21.0074 | 230.151 | 55.9693 | 22.1188 | Up   |
| Igkv3-3    | 5.1826  | 3.29109 | 1.42406 | 2.31106 | 0.02083  | 0.0688   | 0.9675  | 0       | 1.90977 | 10.3672 | 15.8404 | 2.0108  | Up   |
| Igkv3-1    | 24.2253 | 2.47974 | 0.78381 | 3.1637  | 0.00156  | 0.00808  | 5.80501 | 12.4574 | 3.81953 | 39.3952 | 71.8097 | 12.0648 | Up   |
| Gm30211    | 595.523 | 0.52241 | 0.25753 | 2.02854 | 0.04251  | 0.12018  | 682.089 | 435.049 | 349.487 | 581.598 | 812.084 | 712.829 | Up   |
| Eif2ak3    | 2294.91 | 0.30813 | 0.08857 | 3.47901 | 0.0005   | 0.00312  | 2078.19 | 2040.13 | 2033.9  | 2669.54 | 2497.5  | 2450.16 | Up   |
| Thnsl2     | 790.932 | -0.5092 | 0.19914 | -2.5569 | 0.01056  | 0.03999  | 894.939 | 1066.54 | 825.974 | 654.168 | 502.668 | 801.304 | Down |
| Smyd1      | 824.763 | -1.6816 | 0.36794 | -4.5705 | 4.87E-06 | 5.16E-05 | 935.574 | 2182.91 | 654.095 | 335.896 | 410.794 | 429.306 | Down |
| Cd8b1      | 207.79  | -0.6023 | 0.20625 | -2.9202 | 0.0035   | 0.01606  | 250.583 | 209.859 | 291.239 | 151.361 | 164.74  | 178.961 | Down |
| Gm44174    | 11.3496 | -1.9019 | 0.78707 | -2.4164 | 0.01567  | 0.05497  | 18.3825 | 12.4574 | 22.9172 | 2.07343 | 4.2241  | 8.04321 | Up   |
| Cd8a       | 252.303 | -0.7084 | 0.21361 | -3.3165 | 0.00091  | 0.00516  | 308.633 | 285.561 | 344.713 | 198.013 | 228.101 | 148.799 | Down |
| Gm44172    | 2.07186 | 4.55162 | 2.08063 | 2.18761 | 0.0287   | NA       | 0       | 0       | 0       | 2.07343 | 6.33615 | 4.0216  | Up   |
| Reep1      | 946.763 | -0.5038 | 0.15243 | -3.3049 | 0.00095  | 0.00535  | 964.599 | 1242.86 | 1123.9  | 752.656 | 712.817 | 883.747 | Down |
| Atoh8      | 1252.13 | -0.7632 | 0.13802 | -5.5293 | 3.22E-08 | 5.29E-07 | 1378.69 | 1566.75 | 1781.81 | 998.357 | 913.462 | 873.693 | Down |
| Sftpb      | 173205  | 0.76828 | 0.19112 | 4.01986 | 5.82E-05 | 0.00047  | 166072  | 94825.4 | 123543  | 228154  | 204422  | 222216  | Up   |
| Tmem150    | 1921.91 | -0.2462 | 0.11037 | -2.2308 | 0.02569  | 0.08133  | 2050.14 | 2178.12 | 2028.17 | 1934.51 | 1710.76 | 1629.75 | Down |
| Rnf181     | 12070   | 0.52062 | 0.10629 | 4.89835 | 9.66E-07 | 1.20E-05 | 10250.7 | 9179.16 | 10316.6 | 15580.8 | 13698.8 | 13394   | Up   |
| Vamp5      | 1928.71 | -0.4337 | 0.10976 | -3.9507 | 7.79E-05 | 0.00061  | 2235.9  | 2087.09 | 2326.09 | 1762.42 | 1652.68 | 1508.1  | Down |
| Vamp8      | 15450.5 | 0.26005 | 0.11222 | 2.31724 | 0.02049  | 0.06803  | 15015.6 | 12864.6 | 14305.1 | 18370.6 | 16726.4 | 15420.8 | Up   |
| Ggcx       | 3554.82 | 0.61357 | 0.10474 | 5.85813 | 4.68E-09 | 9.16E-08 | 3091.17 | 2572.92 | 2766.3  | 4343.84 | 4210.37 | 4344.34 | Up   |
| Mat2a      | 24150.5 | -0.5203 | 0.15206 | -3.4212 | 0.00062  | 0.00374  | 23664.1 | 31814.2 | 29896.4 | 20084.3 | 22249.4 | 17194.4 | Down |
| Capg       | 3679.26 | 1.36363 | 0.21623 | 6.30625 | 2.86E-10 | 7.00E-09 | 2648.05 | 1787.15 | 1742.66 | 5254.08 | 6531.52 | 4112.09 | Up   |
| Retsat     | 2045.58 | 0.61722 | 0.14228 | 4.33814 | 1.44E-05 | 0.00014  | 1767.63 | 1715.28 | 1360.71 | 2492.26 | 2686.53 | 2251.09 | Up   |
| Tgoln1     | 16447.6 | 1.63474 | 0.13053 | 12.5235 | 5.55E-36 | 1.93E-33 | 8426.94 | 7894.13 | 7717.36 | 24000   | 28971   | 21676.4 | Up   |
| Gm20560    | 26.2932 | -1.1731 | 0.50244 | -2.3348 | 0.01955  | 0.06564  | 22.2525 | 42.1634 | 44.8795 | 16.5875 | 14.7844 | 17.0918 | Down |
| Dnah6      | 5753.45 | -0.7595 | 0.221   | -3.4365 | 0.00059  | 0.00356  | 6403.89 | 8026.37 | 7271.43 | 4515.93 | 2840.71 | 5462.34 | Down |
| Eva1a      | 546.478 | -0.3861 | 0.16893 | -2.2855 | 0.02228  | 0.07262  | 508.906 | 619.035 | 729.531 | 486.22  | 464.651 | 470.528 | Down |
| Sema4f     | 1279.19 | 0.36347 | 0.14538 | 2.50017 | 0.01241  | 0.04563  | 1231.63 | 929.511 | 1195.51 | 1511.53 | 1465.76 | 1341.2  | Up   |
| Dqx1       | 705.36  | -0.5905 | 0.17533 | -3.3679 | 0.00076  | 0.00441  | 755.619 | 860.516 | 927.191 | 642.764 | 449.867 | 596.203 | Down |
| Pcgf1      | 725.389 | -0.326  | 0.14005 | -2.3275 | 0.01994  | 0.06667  | 838.824 | 730.193 | 851.756 | 648.984 | 706.481 | 576.095 | Down |
| Mogs       | 2043.38 | 0.27599 | 0.11441 | 2.41227 | 0.01585  | 0.0555   | 1991.12 | 1695.16 | 1859.16 | 2335.72 | 2319.03 | 2060.07 | Up   |
| Rtnk       | 615.153 | 0.94905 | 0.18285 | 5.19031 | 2.10E-07 | 2.96E-06 | 497.296 | 321.975 | 440.201 | 772.353 | 842.708 | 816.386 | Up   |
| Wdr54      | 318.235 | -0.7786 | 0.19382 | -4.0173 | 5.89E-05 | 0.00047  | 434.408 | 390.97  | 380.998 | 277.84  | 186.916 | 238.28  | Down |
| 1700003E   | 848.989 | -0.6023 | 0.15287 | -3.9399 | 8.15E-05 | 0.00063  | 1142.62 | 1017.67 | 910.958 | 699.783 | 582.926 | 739.975 | Down |
| Mob1a      | 11812.7 | 0.22577 | 0.09316 | 2.42352 | 0.01537  | 0.05411  | 11329.4 | 10227.5 | 11113.9 | 12215.6 | 13553   | 12436.8 | Up   |
| Bola3      | 1112.15 | -0.3896 | 0.14057 | -2.7718 | 0.00558  | 0.02375  | 1074.89 | 1433.55 | 1275.72 | 985.917 | 976.823 | 925.974 | Down |
| Actg2      | 1268.38 | -1.9559 | 0.50425 | -3.8788 | 0.0001   | 0.00079  | 1115.53 | 2764.58 | 2170.45 | 544.276 | 712.817 | 302.626 | Down |
| Cd207      | 130.092 | 0.9114  | 0.40392 | 2.2564  | 0.02405  | 0.07724  | 115.133 | 45.9964 | 109.812 | 240.518 | 139.395 | 129.697 | Up   |
| Nagk       | 2824.41 | 0.37197 | 0.10532 | 3.53193 | 0.00041  | 0.00262  | 2432.3  | 2564.3  | 2390.07 | 3255.29 | 3410.96 | 2893.54 | Up   |
| Paip2b     | 3494.98 | 0.5846  | 0.10017 | 5.83618 | 5.34E-09 | 1.03E-07 | 2935.4  | 2573.88 | 2879.93 | 4411.23 | 4122.72 | 4046.74 | Up   |
| Gm44127    | 59.9381 | -1.0591 | 0.30288 | -3.4968 | 0.00047  | 0.00295  | 87.0751 | 84.3268 | 71.6162 | 37.3218 | 39.0729 | 40.216  | Down |
| Cyp26b1    | 2080.76 | -1.6796 | 0.30859 | -5.4428 | 5.25E-08 | 8.29E-07 | 2956.68 | 2792.37 | 3765.1  | 1033.61 | 1434.08 | 502.7   | Down |
| Spr-ps1    | 37.9797 | -1.0444 | 0.44478 | -2.3482 | 0.01887  | 0.0638   | 31.9275 | 68.9946 | 52.5186 | 25.9179 | 26.4006 | 22.1188 | Down |
| Smyd5      | 1203.24 | 0.37686 | 0.13575 | 2.77602 | 0.0055   | 0.02349  | 904.614 | 1044.5  | 1191.69 | 1410.97 | 1348.54 | 1319.09 | Up   |
| Pradc1     | 856.369 | 0.25784 | 0.11235 | 2.29505 | 0.02173  | 0.07119  | 811.734 | 739.776 | 788.733 | 886.392 | 929.302 | 982.277 | Up   |
| Nat8f7     | 103.166 | -1.2518 | 0.31426 | -3.9834 | 6.79E-05 | 0.00054  | 165.443 | 112.116 | 158.511 | 50.7991 | 50.6892 | 81.4375 | Down |
| Nat8f4     | 288.399 | 0.63484 | 0.12573 | 2.46727 | 0.01361  | 0.04918  | 313.47  | 187.819 | 176.653 | 374.254 | 305.191 | 373.004 | Up   |
| Gm10443    | 106.974 | -0.5127 | 0.24164 | -2.1217 | 0.03386  | 0.10057  | 126.743 | 109.241 | 141.323 | 94.3411 | 89.7622 | 80.4321 | Down |
| Snrgp      | 901.244 | -0.335  | 0.12172 | -2.7523 | 0.00592  | 0.02491  | 1047.8  | 905.554 | 1062.78 | 813.822 | 818.42  | 759.078 | Down |
| Pcyox1     | 5489.28 | 0.74493 | 0.16029 | 4.64732 | 3.36E-06 | 3.70E-05 | 5073.58 | 3667.26 | 3567.44 | 6794.64 | 7454.48 | 6378.26 | Up   |
| Gm43936    | 23.4685 | -1.4254 | 0.51929 | -2.7449 | 0.00605  | 0.02534  | 23.22   | 34.4973 | 44.8795 | 13.4773 | 12.6723 | 12.0648 | Down |
| Gm28719    | 71.1589 | -1.1947 | 0.39983 | -2.988  | 0.00281  | 0.0133   | 55.1476 | 121.699 | 120.315 | 47.6889 | 34.8488 | 47.2538 | Down |
| Gm44386    | 28.2994 | -3.7982 | 0.72934 | -5.2077 | 1.91E-07 | 2.72E-06 | 38.7001 | 90.0763 | 29.6014 | 5.18358 | 4.2241  | 2.0108  | Down |
| 1600020E   | 1089.38 | -0.6451 | 0.12654 | -5.0979 | 3.43E-07 | 4.68E-06 | 1209.38 | 1315.69 | 1461.93 | 868.768 | 786.739 | 893.801 | Up   |
| Snrrp27    | 1756.35 | -0.2391 | 0.11891 | -2.0111 | 0.04431  | 0.12411  | 1737.63 | 1974.97 | 1991.89 | 1657.71 | 1716.04 | 1459.84 | Down |
| Anxa4      | 15032   | 0.79054 | 0.11164 | 7.08088 | 1.43E-12 | 5.05E-11 | 12290.2 | 9975.47 | 10774.9 | 19275.7 | 19841.7 | 18033.9 | Up   |
| Gfpt1      | 7442.33 | 1.00849 | 0.08322 | 12.1185 | 8.43E-34 | 2.36E-31 | 4835.57 | 5103.69 | 4887.09 | 9446.55 | 10120.9 | 10260.1 | Up   |
| D6Erttd52i | 163.01  | 2.86249 | 0.29358 | 9.75018 | 1.84E-22 | 2.01E-20 | 54.1801 | 31.6225 | 32.466  | 233.261 | 338.984 | 287.545 | Up   |
| Gkn3       | 81.1053 | 1.18386 | 0.37337 | 3.17075 | 0.00152  | 0.00792  | 36.7651 | 72.8277 | 39.1502 | 86.0474 | 115.107 | 136.735 | Up   |
| Arhgap25   | 1122.62 | 0.46592 | 0.16033 | 2.90598 | 0.00366  | 0.01666  | 1121.33 | 809.729 | 897.59  | 1339.44 | 1401.35 | 1166.27 | Up   |
| Prokr1     | 36.4132 | 1.75761 | 0.5001  | 3.51454 | 0.00044  | 0.00278  | 9.67501 | 15.3321 | 24.827  | 40.4319 | 73.9218 | 54.2916 | Up   |
| Aplf       | 466.752 | 0.47044 | 0.13956 | 3.37074 | 0.00075  | 0.00437  | 366.683 | 379.47  | 427.788 | 505.917 | 558.637 | 562.019 | Up   |
| 1810020C   | 432.02  | -0.551  | 0.25699 | -2.1439 | 0.03204  | 0.09637  | 474.076 | 571.122 | 495.584 | 364.924 | 224.933 | 461.479 | Down |
| Efcc1      | 170.655 | -0.4327 | 0.21797 | -1.9849 | 0.04716  | 0.13039  | 170.28  | 195.485 | 222.488 | 137.883 | 129.891 | 167.902 | Down |
| Gp9        | 146.69  | -1.6336 | 0.35048 | -4.661  | 3.15E-06 | 3.48E-05 | 136.418 | 292.269 | 236.811 | 68.4232 | 92.9302 | 53.2862 | Down |
| Cnbp       | 22640.3 | -0.2811 | 0.09637 | -2.9169 | 0.00354  | 0.0162   | 24303.6 | 23862.6 | 26350.9 | 20912.6 | 21517.6 | 18894.5 | Down |
| Copg1      | 3810.25 | 0.42308 | 0.08388 | 5.04398 | 4.56E-07 | 6.06E-06 | 3405.61 | 3154.59 | 3206.5  | 4446.47 | 4254.73 | 4393.6  | Up   |
| Rab7       | 1105.68 | 0.44311 | 0.13441 | 3.2968  | 0.00098  | 0.00548  | 1064.25 | 813.562 | 933.875 | 1295.89 | 1235.55 | 1290.93 | Up   |
| Rpn1       | 13913.7 | 0.32065 | 0.08193 | 3.91378 | 9.09E-05 | 0.0007   | 11949.6 | 12220.7 | 12951.1 | 16050.4 | 15280.7 | 15029.7 | Up   |
| Gata2      | 6923    | -1.1235 | 0.19462 | -5.773  | 7.79E-09 | 1.45E-07 | 7071.47 | 10090.5 | 11308.7 | 4932.69 | 4530.35 | 3604.36 | Down |
| Sec61a1    | 7253.67 | 0.55811 | 0.11109 | 5.02389 | 5        |          |         |         |         |         |         |         |      |

|                           |         |         |         |         |          |          |         |         |         |         |         |         |      |
|---------------------------|---------|---------|---------|---------|----------|----------|---------|---------|---------|---------|---------|---------|------|
| Chchd6                    | 1516.83 | -0.5755 | 0.15697 | -3.6661 | 0.00025  | 0.00166  | 1601.21 | 2112    | 1733.11 | 1305.23 | 1044.41 | 1305.01 | Down |
| Txnrd3                    | 1393.34 | 0.32997 | 0.11458 | 2.87981 | 0.00398  | 0.01789  | 1371.92 | 1184.41 | 1147.77 | 1534.34 | 1590.37 | 1531.23 | Up   |
| Vmn1r42                   | 34.2195 | 2.07605 | 0.52585 | 3.94796 | 7.88E-05 | 0.00062  | 10.6425 | 21.0817 | 7.63906 | 71.5334 | 40.129  | 54.2916 | Up   |
| Uroc1                     | 10.7091 | 1.9169  | 0.73584 | 2.60504 | 0.00919  | 0.0356   | 4.83751 | 3.83303 | 4.77441 | 17.6242 | 21.1205 | 12.0648 | Up   |
| Cfap100                   | 3802.07 | -0.6623 | 0.17421 | -3.8018 | 0.00014  | 0.00104  | 4231.85 | 4962.82 | 4784.92 | 3356.89 | 2213.43 | 3262.53 | Down |
| Gm44117                   | 21.9597 | -1.6414 | 0.54739 | -2.9985 | 0.00271  | 0.0129   | 24.1875 | 44.0799 | 31.5111 | 13.4773 | 8.4482  | 10.054  | Down |
| Klf15                     | 3732.52 | -1.5131 | 0.20895 | -7.2414 | 4.44E-13 | 1.70E-11 | 4962.32 | 5852.09 | 5770.36 | 2352.31 | 1310.53 | 2147.54 | Down |
| Gm44421                   | 151.306 | -1.844  | 0.26877 | -6.8609 | 6.84E-12 | 2.18E-10 | 210.915 | 225.191 | 274.051 | 79.8271 | 46.4651 | 71.3835 | Down |
| Aldh1l1                   | 1063.46 | 1.13223 | 0.20532 | 5.51437 | 3.50E-08 | 5.69E-07 | 534.061 | 864.349 | 600.621 | 1353.95 | 1331.65 | 1696.11 | Up   |
| Slc41a3                   | 678.76  | -0.7524 | 0.2571  | -2.9264 | 0.00343  | 0.01579  | 639.518 | 1207.41 | 708.523 | 444.751 | 599.822 | 472.538 | Down |
| Fbln2                     | 809.149 | -1.2999 | 0.28625 | -4.5414 | 5.59E-06 | 5.84E-05 | 1124.24 | 1400.97 | 927.191 | 505.917 | 624.111 | 272.464 | Down |
| Wnt7a                     | 731.529 | 0.85601 | 0.30369 | 2.81875 | 0.00482  | 0.02104  | 683.056 | 368.93  | 509.907 | 928.897 | 1304.19 | 594.192 | Up   |
| Xpc                       | 2225.12 | -0.4237 | 0.09014 | -4.7005 | 2.60E-06 | 2.92E-05 | 2438.1  | 2580.59 | 2629.75 | 1957.32 | 1905.07 | 1839.88 | Down |
| Gm45218                   | 48.0793 | -1.3218 | 0.5439  | -2.4303 | 0.01509  | 0.0533   | 117.068 | 60.3703 | 28.6465 | 27.9913 | 23.2326 | 31.1674 | Down |
| Slc6a6                    | 12757.2 | 0.4619  | 0.14278 | 3.23515 | 0.00122  | 0.00657  | 12540.8 | 10469.9 | 9185.97 | 14405.2 | 16259.6 | 13681.5 | Up   |
| Grip2                     | 392.81  | -0.8088 | 0.27235 | -2.9696 | 0.00298  | 0.014    | 334.756 | 695.696 | 469.802 | 286.134 | 323.144 | 247.329 | Down |
| Fgd5                      | 4435.04 | -0.443  | 0.1398  | -3.1687 | 0.00153  | 0.00797  | 4541.45 | 4882.33 | 5907.86 | 3654.42 | 4177.64 | 3446.51 | Down |
| Prickle2                  | 5369.04 | -0.2539 | 0.11927 | -2.1291 | 0.03325  | 0.09914  | 6050.75 | 5400.75 | 6069.24 | 4588.5  | 5530.4  | 4574.57 | Down |
| Adamts9                   | 1656.64 | -0.8451 | 0.27939 | -3.0249 | 0.00249  | 0.01199  | 1239.37 | 2178.12 | 2967.78 | 1010.8  | 1407.68 | 1136.1  | Down |
| 9530026P                  | 1227.78 | -0.9114 | 0.1801  | -5.0607 | 4.18E-07 | 5.59E-06 | 1831.48 | 1327.19 | 1650.99 | 690.453 | 955.703 | 910.893 | Down |
| Slc25a26                  | 547.455 | -0.4618 | 0.16868 | -2.7376 | 0.00619  | 0.02583  | 586.306 | 753.191 | 563.381 | 488.293 | 477.323 | 416.236 | Down |
| Suclg2                    | 3557.68 | -0.4426 | 0.13147 | -3.3667 | 0.00076  | 0.00443  | 3735.52 | 4560.35 | 4001.91 | 3149.54 | 2644.29 | 3254.48 | Down |
| Tafa1                     | 185.856 | -1.1496 | 0.3631  | -3.166  | 0.00155  | 0.00803  | 142.223 | 281.728 | 344.713 | 78.7904 | 130.947 | 136.735 | Down |
| Tafa4                     | 47.612  | 4.45273 | 0.66686 | 6.67714 | 2.44E-11 | 7.18E-10 | 1.935   | 7.66607 | 2.86465 | 150.324 | 67.5856 | 55.297  | Up   |
| Uba3                      | 4266.33 | 0.26914 | 0.07817 | 3.443   | 0.00058  | 0.00349  | 3852.59 | 3881.91 | 3873.96 | 4560.51 | 4831.32 | 4597.7  | Up   |
| Arl6ip5                   | 7853.42 | 0.27862 | 0.09084 | 3.06724 | 0.00216  | 0.01063  | 7264    | 7001.04 | 7026.98 | 8576.75 | 9208.54 | 8043.21 | Up   |
| Lmod3                     | 94.241  | -4.1615 | 0.61507 | -6.766  | 1.32E-11 | 4.09E-10 | 114.165 | 344.015 | 77.3455 | 5.18358 | 12.6723 | 12.0648 | Down |
| Mitf                      | 886.792 | 0.31981 | 0.13993 | 2.28556 | 0.02228  | 0.07262  | 839.791 | 845.184 | 681.786 | 902.98  | 1027.51 | 1023.5  | Up   |
| Gm20696                   | 308.69  | -0.5373 | 0.15955 | -3.3673 | 0.00076  | 0.00442  | 357.976 | 351.681 | 386.728 | 266.436 | 266.118 | 223.199 | Down |
| Tpt1-ps3                  | 6345.56 | -0.2427 | 0.1067  | -2.2743 | 0.02295  | 0.07439  | 7071.47 | 6495.08 | 7067.09 | 5836.71 | 6327.7  | 5275.34 | Down |
| Rybp                      | 1221.21 | 0.32733 | 0.15487 | 2.11358 | 0.03455  | 0.10223  | 1257.75 | 889.264 | 1102.89 | 1293.82 | 1333.76 | 1449.79 | Up   |
| Gxylt2                    | 159.824 | -0.792  | 0.34067 | -2.325  | 0.02007  | 0.06701  | 180.923 | 304.726 | 122.225 | 121.296 | 116.163 | 113.61  | Down |
| Cntn4                     | 56.9314 | -1.2857 | 0.40423 | -3.1805 | 0.00147  | 0.00771  | 93.8476 | 93.9093 | 54.4283 | 43.5421 | 32.7368 | 23.1242 | Down |
| Sumf1                     | 2959.94 | 0.31096 | 0.1039  | 2.99293 | 0.00276  | 0.01311  | 2725.45 | 2605.51 | 2595.37 | 3153.69 | 3602.1  | 3077.53 | Up   |
| Bhlhe40                   | 6853.93 | 1.14662 | 0.2028  | 5.65401 | 1.57E-08 | 2.73E-07 | 5635.7  | 4077.39 | 3082.36 | 9108.59 | 10073.4 | 9146.13 | Up   |
| Arl8b                     | 7106.07 | 0.27651 | 0.08361 | 3.30711 | 0.00094  | 0.00531  | 6711.56 | 6438.54 | 6131.3  | 7746.34 | 8028.96 | 7579.72 | Up   |
| Edem1                     | 4551.97 | 0.66669 | 0.08427 | 7.9113  | 2.55E-15 | 1.33E-13 | 3470.43 | 3448.77 | 3636.19 | 5528.81 | 5836.65 | 5390.96 | Up   |
| Lmcd1                     | 807.661 | -0.8351 | 0.21539 | -3.8772 | 0.00011  | 0.0008   | 778.839 | 1141.29 | 1185.01 | 509.027 | 717.041 | 514.765 | Down |
| Cav3                      | 154.537 | -1.1436 | 0.40804 | -2.8028 | 0.00507  | 0.02196  | 152.865 | 357.43  | 127.954 | 89.1576 | 120.387 | 79.4267 | Down |
| Srgap3                    | 263.998 | -0.4522 | 0.2089  | -2.1646 | 0.03042  | 0.09272  | 322.178 | 314.309 | 278.826 | 223.931 | 175.3   | 269.447 | Down |
| Gt(ROSA)26 <sup>cre</sup> | 2850.06 | 1.65256 | 0.30851 | 5.35657 | 8.48E-08 | 1.27E-06 | 953.956 | 942.927 | 2229.65 | 4071.18 | 5217.82 | 3684.79 | Up   |
| Lhfp14                    | 214.224 | -1.4348 | 0.28287 | -5.0724 | 3.93E-07 | 5.29E-06 | 264.128 | 334.432 | 339.938 | 106.782 | 79.2019 | 160.864 | Down |
| Camk1                     | 3422.33 | 0.43902 | 0.12262 | 3.58041 | 0.00034  | 0.00223  | 3022.47 | 2746.37 | 2947.72 | 3993.43 | 4382.51 | 3441.49 | Up   |
| Arpc4                     | 4267.12 | 0.58444 | 0.13132 | 4.45033 | 8.57E-06 | 8.58E-05 | 3843.88 | 3166.09 | 3233.23 | 5169.07 | 5634.95 | 4555.47 | Up   |
| Cidec                     | 969.04  | -1.5319 | 0.71476 | -2.1432 | 0.0321   | 0.09652  | 1157.13 | 2566.22 | 596.802 | 401.209 | 776.179 | 316.701 | Down |
| Jagn1                     | 1520.47 | 0.26649 | 0.10493 | 2.53959 | 0.0111   | 0.04162  | 1395.14 | 1319.52 | 1426.6  | 1786.26 | 1617.83 | 1577.47 | Up   |
| Vhl                       | 1800.27 | 0.27096 | 0.11068 | 2.44811 | 0.01436  | 0.05128  | 1812.13 | 1537.05 | 1545.96 | 1981.16 | 1996.94 | 1928.36 | Up   |
| Irak2                     | 3489.4  | 0.21489 | 0.1068  | 2.01201 | 0.04422  | 0.1239   | 2961.52 | 3310.78 | 3417.53 | 3598.44 | 4027.68 | 3620.45 | Up   |
| Tatdn2                    | 2319.74 | 0.32231 | 0.12759 | 2.52618 | 0.01153  | 0.04299  | 2227.19 | 1859.02 | 2098.83 | 2304.62 | 2823.81 | 2604.99 | Up   |
| Ghrl                      | 48.2687 | -1.5075 | 0.53848 | -2.7995 | 0.00512  | 0.02214  | 90.9451 | 37.3721 | 85.9395 | 41.4686 | 14.7844 | 19.1026 | Down |
| Gm44053                   | 55.2443 | -1.1682 | 0.33305 | -3.5077 | 0.00045  | 0.00284  | 72.5626 | 74.7442 | 82.1199 | 25.9179 | 35.9049 | 40.216  | Down |
| Atp2b2                    | 475.704 | -1.6534 | 0.22987 | -7.1928 | 6.35E-13 | 2.37E-11 | 803.994 | 657.365 | 704.704 | 216.674 | 166.852 | 304.636 | Down |
| Slc6a1                    | 51.9286 | 3.04975 | 0.62799 | 4.85636 | 1.20E-06 | 1.44E-05 | 3.87001 | 24.9147 | 4.77441 | 107.818 | 89.7622 | 80.4321 | Up   |
| Atg7                      | 3019.28 | 0.27207 | 0.11007 | 2.47174 | 0.01345  | 0.04868  | 3026.34 | 2607.42 | 2572.45 | 3381.77 | 3410.96 | 3116.74 | Up   |
| Pparg                     | 996.804 | 0.74435 | 0.24343 | 3.05772 | 0.00223  | 0.01091  | 986.851 | 756.066 | 492.72  | 1207.77 | 1442.53 | 1094.88 | Up   |
| Tsen2                     | 406.346 | -0.4977 | 0.13594 | -3.661  | 0.00025  | 0.00169  | 511.808 | 457.089 | 458.344 | 335.896 | 342.152 | 332.788 | Down |
| Mkrrn2os                  | 151.028 | 3.2459  | 0.25365 | 12.7968 | 1.71E-37 | 6.95E-35 | 28.0575 | 34.4973 | 23.8721 | 261.252 | 261.894 | 296.593 | Up   |
| Raf1                      | 2037.18 | 0.29579 | 0.1186  | 2.49399 | 0.01263  | 0.04626  | 2021.11 | 1627.12 | 1839.1  | 2180.21 | 2202.87 | 2352.64 | Up   |
| Tmem40                    | 249.154 | 1.116   | 0.314   | 3.55416 | 0.00038  | 0.00244  | 97.7176 | 239.565 | 134.638 | 339.006 | 363.273 | 320.723 | Up   |
| Cand2                     | 276.016 | -1.4406 | 0.31218 | -4.6146 | 3.94E-06 | 4.27E-05 | 314.438 | 596.995 | 298.878 | 121.296 | 141.507 | 182.983 | Down |
| Mbd4                      | 184.79  | 0.58525 | 0.1912  | 3.06093 | 0.00221  | 0.01081  | 135.45  | 153.321 | 154.691 | 199.049 | 224.933 | 241.296 | Up   |
| Ift122                    | 1351.36 | -0.4072 | 0.14944 | -2.725  | 0.00643  | 0.02662  | 1556.71 | 1587.83 | 1478.16 | 1259.61 | 940.919 | 1284.9  | Down |
| Tmcc1                     | 2389.6  | 0.26213 | 0.10154 | 2.58161 | 0.00983  | 0.03768  | 2283.3  | 2171.41 | 2064.46 | 2640.52 | 2749.89 | 2428.04 | Up   |
| 9530062K                  | 88.6836 | -0.5668 | 0.25406 | -2.2311 | 0.02568  | 0.08129  | 94.8151 | 112.116 | 110.766 | 72.5701 | 64.4175 | 77.4159 | Down |
| Washc2                    | 2720    | 0.22305 | 0.11363 | 1.96301 | 0.04965  | 0.13607  | 2825.1  | 2358.27 | 2347.1  | 2929.76 | 3005.45 | 2854.33 | Up   |
| Marchf8                   | 4996.01 | 0.24651 | 0.08694 | 2.83555 | 0.00457  | 0.02014  | 4803.64 | 4322.7  | 4584.39 | 5536.06 | 5276.96 | 5452.29 | Up   |
| Alox5                     | 878.742 | 1.23431 | 0.28848 | 4.2786  | 1.88E-05 | 0.00017  | 727.561 | 535.667 | 309.382 | 1252.35 | 1475.27 | 972.223 | Up   |
| Rassf4                    | 2339.34 | 0.87761 | 0.16883 | 5.19822 | 2.01E-07 | 2.85E-06 | 1936.94 | 1677.91 | 1332.06 | 2786.69 | 3473.27 | 2829.2  | Up   |
| Cxcl12                    | 13281.2 | 0.31037 | 0.12862 | 2.41312 | 0.01582  | 0.0554   | 10614.5 | 11399.4 | 13560.3 | 13596.5 | 15997.7 | 14519   | Up   |
| Zfp637                    | 1192.9  | -0.2441 | 0.1056  | -2.3115 | 0.02081  | 0.06876  | 1362.24 | 1217.95 | 1300.55 | 1143.5  | 1063.42 | 1069.75 | Down |
| Fxyd4                     | 140.452 | 1.13489 | 0.31537 | 3.59858 | 0.00032  | 0.0021   | 52.2451 | 102.534 | 108.857 | 224.967 | 172.132 | 181.978 | Up   |
| Gm4875                    | 33.6008 | 0.90635 | 0.44965 | 2.01566 | 0.04384  | 0.12313  | 28.0575 | 14.3739 | 27.6916 | 43.5421 | 51.7452 | 36.1944 | Up   |
| Ret                       | 1245.63 | -0.4266 | 0.1285  | -3.32   | 0.0009   | 0.0051   | 1483.18 | 1301.32 | 1501.08 | 1133.13 | 944.087 | 1110.97 | Down |
| Zfp248                    | 300.085 | -0.322  | 0.14815 | -2.1738 | 0.02972  | 0.09122  | 312.503 | 343.057 | 344.713 | 261.252 | 274.567 | 264.42  | Down |
| Zfp9                      | 590.648 | -0.6609 | 0.14854 | -4.449  | 8.63E-06 | 8.61E-05 | 628.876 | 776.19  | 765.816 | 421.943 | 460.427 | 490.636 | Down |
| Cacna1c                   | 2655.36 | 0.42923 | 0.14294 | 3.00289 | 0.00267  | 0.01276  | 1978.54 | 2571.97 | 2239.2  | 2670.58 | 3211.37 | 3260.52 | Up   |
| Dcp1b                     | 1237.85 | -0.211  | 0.10488 | -2.012  | 0.04422  |          |         |         |         |         |         |         |      |

|           |         |         |         |         |          |          |         |         |         |         |         |         |      |
|-----------|---------|---------|---------|---------|----------|----------|---------|---------|---------|---------|---------|---------|------|
| Bcl2l13   | 1595.48 | 0.2344  | 0.10648 | 2.20147 | 0.0277   | 0.08643  | 1503.5  | 1559.09 | 1335.88 | 1686.74 | 1760.39 | 1727.28 | Up   |
| Bid       | 714.394 | 0.67971 | 0.12052 | 5.63966 | 1.70E-08 | 2.94E-07 | 520.516 | 548.124 | 578.659 | 886.392 | 928.246 | 824.429 | Up   |
| Mical3    | 1923.52 | -0.3177 | 0.15603 | -2.0361 | 0.04174  | 0.1185   | 1788.91 | 2233.7  | 2380.52 | 1585.14 | 1966.32 | 1586.52 | Down |
| Tuba8     | 954.028 | 0.6026  | 0.18921 | 3.18482 | 0.00145  | 0.00761  | 730.464 | 858.6   | 683.696 | 1346.69 | 1224.99 | 879.726 | Up   |
| Slc6a13   | 33.5898 | -3.9314 | 0.72518 | -5.4213 | 5.92E-08 | 9.21E-07 | 48.3751 | 111.158 | 29.6014 | 6.2203  | 3.16808 | 3.0162  | Down |
| lqsec3    | 4.16478 | -5.4547 | 2.2511  | -2.4231 | 0.01539  | 0.05416  | 7.74001 | 17.2487 | 0       | 0       | 0       | 0       | Down |
| M6pr      | 14580.2 | 0.63932 | 0.08416 | 7.59641 | 3.04E-14 | 1.40E-12 | 11680.6 | 11072.7 | 11451   | 17735.1 | 18702.2 | 16839.5 | Up   |
| Apobec1   | 1498.66 | 0.87558 | 0.10882 | 8.04588 | 8.56E-16 | 4.81E-14 | 1000.4  | 1143.2  | 1028.41 | 1837.06 | 2024.4  | 1958.52 | Up   |
| Gdf3      | 9.35977 | 4.81773 | 1.35633 | 3.55203 | 0.00038  | 0.00246  | 1.935   | 0       | 0       | 17.6242 | 8.4482  | 28.1512 | Up   |
| Dppa3     | 8.77042 | 6.634   | 1.43847 | 4.61184 | 3.99E-06 | 4.32E-05 | 0       | 0       | 0       | 22.8077 | 13.7283 | 16.0864 | Up   |
| Slc2a3    | 497.215 | -0.8937 | 0.18846 | -4.7422 | 2.11E-06 | 2.43E-05 | 672.414 | 736.901 | 529.96  | 350.41  | 396.01  | 297.599 | Down |
| C3ar1     | 453.565 | 1.45136 | 0.25609 | 5.66736 | 1.45E-08 | 2.54E-07 | 312.503 | 258.73  | 157.556 | 645.874 | 576.59  | 770.137 | Up   |
| Clec4a3   | 774.114 | 1.37999 | 0.1886  | 7.31691 | 2.54E-13 | 1.01E-11 | 461.498 | 501.169 | 326.57  | 1234.73 | 1118.33 | 1002.38 | Up   |
| Clec4a2   | 412.305 | 1.36398 | 0.22737 | 5.99898 | 1.99E-09 | 4.13E-08 | 300.893 | 228.066 | 163.285 | 574.341 | 624.111 | 583.133 | Up   |
| Clec4n    | 1554.97 | 3.38465 | 0.67237 | 5.03393 | 4.81E-07 | 6.34E-06 | 518.581 | 188.777 | 107.902 | 2968.12 | 3075.15 | 2471.28 | Up   |
| Clec4d    | 446.946 | 0.92553 | 0.3958  | 2.33839 | 0.01937  | 0.06509  | 476.978 | 295.144 | 152.781 | 429.2   | 869.109 | 458.463 | Up   |
| Clec4e    | 487.066 | 2.05235 | 0.38707 | 5.30229 | 1.14E-07 | 1.68E-06 | 277.673 | 206.026 | 84.0297 | 538.056 | 1066.59 | 750.029 | Up   |
| Cd163     | 549.952 | -1.0772 | 0.30936 | -3.4821 | 0.0005   | 0.00309  | 863.979 | 991.798 | 382.908 | 376.328 | 356.937 | 327.761 | Down |
| Clstn3    | 236.222 | -1.0285 | 0.3193  | -3.2212 | 0.00128  | 0.00686  | 265.095 | 424.509 | 261.638 | 164.838 | 97.1543 | 204.096 | Down |
| C1rl      | 752.033 | 1.04014 | 0.22608 | 4.6008  | 4.21E-06 | 4.53E-05 | 612.428 | 498.294 | 365.72  | 1029.46 | 807.859 | 1198.44 | Up   |
| C1ra      | 4281.78 | 0.40389 | 0.16451 | 2.45506 | 0.01409  | 0.05053  | 4359.56 | 3548.43 | 3151.11 | 5446.91 | 4096.32 | 5088.33 | Up   |
| C1s1      | 2006.2  | -0.2972 | 0.09417 | -3.1558 | 0.0016   | 0.00827  | 2238.8  | 2185.79 | 2211.51 | 1879.57 | 1837.48 | 1684.05 | Down |
| Lpcat3    | 4165.31 | 0.8274  | 0.10022 | 8.25582 | 1.51E-16 | 9.34E-15 | 3051.5  | 3140.21 | 2815.95 | 5169.07 | 5726.83 | 5088.33 | Up   |
| Emg1      | 2639.93 | -0.2602 | 0.10746 | -2.4214 | 0.01546  | 0.05435  | 2685.78 | 2754.99 | 3191.22 | 2448.72 | 2376.06 | 2382.8  | Down |
| Ptpn6     | 2772.79 | 0.86253 | 0.16988 | 5.07725 | 3.83E-07 | 5.16E-06 | 2375.22 | 1821.65 | 1706.38 | 3395.24 | 4170.24 | 3168.02 | Up   |
| Eno2      | 315.103 | -0.7894 | 0.20374 | -3.8744 | 0.00011  | 0.0008   | 324.113 | 477.213 | 396.276 | 260.216 | 219.653 | 213.145 | Down |
| Lrrc23    | 4641.45 | -0.9397 | 0.2209  | -4.2538 | 2.10E-05 | 0.00019  | 5393.82 | 6958.87 | 5952.74 | 3507.21 | 2109.94 | 3926.09 | Down |
| Spsb2     | 876.061 | 0.40047 | 0.17194 | 2.32906 | 0.01986  | 0.06643  | 879.459 | 723.485 | 662.689 | 1018.05 | 1134.17 | 838.504 | Up   |
| Gpr162    | 171.824 | -0.4613 | 0.18712 | -2.4653 | 0.01369  | 0.04939  | 187.695 | 215.608 | 193.841 | 142.03  | 151.012 | 140.756 | Down |
| Acrbp     | 612.67  | -0.5412 | 0.15837 | -3.4173 | 0.00063  | 0.00378  | 686.926 | 682.28  | 809.741 | 446.825 | 474.155 | 576.095 | Down |
| Chd4      | 10059.4 | 0.21864 | 0.0881  | 2.48162 | 0.01308  | 0.04756  | 9794.02 | 8675.12 | 9426.6  | 10806.7 | 11085.1 | 10568.8 | Up   |
| Gapdh     | 2531.25 | 0.40978 | 0.16851 | 2.43183 | 0.01502  | 0.05311  | 2198.16 | 2582.51 | 1741.71 | 2922.5  | 3182.86 | 2559.75 | Up   |
| Ltbr      | 5145.83 | 0.3163  | 0.10342 | 3.05853 | 0.00222  | 0.01089  | 4600.47 | 4255.63 | 4895.68 | 5940.38 | 5888.4  | 5294.44 | Up   |
| Plekhhg6  | 535.669 | 0.26973 | 0.13386 | 2.01502 | 0.0439   | 0.12326  | 471.173 | 479.129 | 507.043 | 599.222 | 529.069 | 628.376 | Up   |
| Cd9       | 29837.3 | 0.67733 | 0.1449  | 4.67441 | 2.95E-06 | 3.29E-05 | 24176.9 | 21704.6 | 22995.5 | 37182.9 | 42915.8 | 30048.4 | Up   |
| Vwfv      | 19442   | -0.5571 | 0.13379 | -4.1643 | 3.12E-05 | 0.00027  | 21203.8 | 26322.4 | 21924.1 | 17697.8 | 14214.1 | 15290.1 | Down |
| Ano2      | 42.3466 | 1.15899 | 0.48727 | 2.37854 | 0.01738  | 0.05968  | 16.4475 | 25.873  | 36.2855 | 40.4319 | 48.5772 | 86.4645 | Up   |
| Kcna5     | 36.5878 | -2.8462 | 0.71195 | -3.9978 | 6.39E-05 | 0.00051  | 29.025  | 120.741 | 42.9697 | 3.11015 | 11.6163 | 12.0648 | Down |
| Kcna6     | 15.3971 | -2.3216 | 0.80815 | -2.8728 | 0.00407  | 0.01825  | 45.4726 | 11.4991 | 20.0525 | 4.14686 | 3.16808 | 8.04321 | Down |
| Rad51ap1  | 76.7403 | 0.98424 | 0.29927 | 3.28884 | 0.00101  | 0.00561  | 58.0501 | 46.9547 | 49.6539 | 111.965 | 79.2019 | 114.616 | Up   |
| Tigar     | 860.563 | 0.22023 | 0.11092 | 1.98557 | 0.04708  | 0.1302   | 770.131 | 833.685 | 781.094 | 892.612 | 979.992 | 905.866 | Up   |
| Ccnd2     | 3172    | 0.65112 | 0.13115 | 4.96477 | 6.88E-07 | 8.83E-06 | 2476.8  | 2262.45 | 2665.08 | 3338.23 | 4150.18 | 4139.24 | Up   |
| Cracr2a   | 2945.3  | 0.35297 | 0.1686  | 2.09356 | 0.0363   | 0.10628  | 2940.24 | 2482.85 | 2337.55 | 3182.72 | 2732.99 | 3995.46 | Up   |
| Prmt8     | 1955.83 | 1.07263 | 0.15821 | 6.77998 | 1.20E-11 | 3.73E-10 | 1379.66 | 1230.4  | 1171.64 | 2411.4  | 2330.65 | 3211.25 | Up   |
| Tspan11   | 4362.09 | 0.9577  | 0.15004 | 6.38285 | 1.74E-10 | 4.45E-09 | 2650.95 | 2907.36 | 3337.32 | 5954.9  | 4828.15 | 6493.88 | Up   |
| Tulp3     | 2332.63 | -0.4486 | 0.09857 | -4.5509 | 5.34E-06 | 5.60E-05 | 2710.94 | 2716.66 | 2649.8  | 1983.24 | 1824.81 | 2110.34 | Down |
| Gm10069   | 355.466 | -0.765  | 0.25183 | -3.0375 | 0.00239  | 0.01157  | 374.423 | 581.663 | 386.728 | 273.693 | 199.589 | 316.701 | Down |
| Pzp       | 45.6795 | -1.0339 | 0.47611 | -2.1715 | 0.02989  | 0.09161  | 42.5701 | 62.2868 | 79.2553 | 15.5507 | 42.241  | 32.1728 | Down |
| Gm44009   | 72.9919 | 5.09383 | 1.906   | 2.67253 | 0.00753  | 0.03027  | 0       | 12.4574 | 0       | 157.581 | 72.8658 | 195.048 | Up   |
| Klrb1c    | 99.1682 | -0.9486 | 0.42106 | -2.2529 | 0.02426  | 0.07775  | 58.0501 | 181.111 | 152.781 | 68.4232 | 61.2495 | 73.3943 | Down |
| Gm44511   | 34.7966 | 1.70561 | 0.46425 | 3.67387 | 0.00024  | 0.00162  | 14.5125 | 20.1234 | 14.3232 | 52.8725 | 70.7537 | 36.1944 | Up   |
| Gm44066   | 175.253 | 0.65729 | 0.22768 | 2.88697 | 0.00389  | 0.01755  | 132.548 | 141.822 | 133.684 | 261.252 | 171.076 | 211.134 | Up   |
| Gm44223   | 6.10992 | 2.73114 | 1.22148 | 2.23592 | 0.02536  | 0.08058  | 0.9675  | 3.83303 | 0       | 14.514  | 5.28013 | 12.0648 | Up   |
| Clec2d    | 4187.59 | -0.3785 | 0.18723 | -2.0215 | 0.04323  | 0.12176  | 4164.13 | 3876.16 | 6160.9  | 3554.9  | 4003.39 | 3366.08 | Down |
| Gm47861   | 5.95838 | 4.14104 | 1.43759 | 2.88055 | 0.00397  | 0.01786  | 0       | 1.91652 | 0       | 8.29373 | 8.4482  | 17.0918 | Up   |
| Clec12a   | 1202.46 | 1.47967 | 0.13822 | 10.7053 | 9.61E-27 | 1.52E-24 | 625.973 | 729.235 | 549.058 | 1731.32 | 1718.15 | 1861    | Up   |
| Clec9a    | 2730.8  | -0.228  | 0.09707 | -2.3485 | 0.01885  | 0.06376  | 2802.85 | 2898.73 | 3136.79 | 2409.33 | 2505.95 | 2631.13 | Down |
| Clec7a    | 6518.24 | 2.95797 | 0.64407 | 4.59262 | 4.38E-06 | 4.69E-05 | 2602.58 | 1215.07 | 641.681 | 10231.3 | 16349.4 | 8069.35 | Up   |
| Olr1      | 1552.05 | 3.30629 | 0.538   | 6.14557 | 7.97E-10 | 1.78E-08 | 478.913 | 227.107 | 148.962 | 2389.63 | 3567.25 | 2500.43 | Up   |
| Gabarapl1 | 9273.25 | -0.4855 | 0.12392 | -3.9178 | 8.94E-05 | 0.00069  | 12393.7 | 9821.19 | 10242.1 | 7944.35 | 8060.64 | 7177.56 | Down |
| Klre1     | 145.044 | -0.7648 | 0.35615 | -2.1474 | 0.03176  | 0.09575  | 128.678 | 273.104 | 146.097 | 78.7904 | 110.883 | 132.713 | Down |
| Klrd1     | 366.584 | -0.4646 | 0.21396 | -2.1713 | 0.02991  | 0.09164  | 347.333 | 516.501 | 411.555 | 261.252 | 299.911 | 362.95  | Down |
| Klrc2     | 102.6   | -0.8811 | 0.37937 | -2.3225 | 0.0202   | 0.06728  | 91.9126 | 183.986 | 123.18  | 66.3498 | 49.6332 | 100.54  | Down |
| Klrc1     | 60.2106 | -0.8946 | 0.38862 | -2.3019 | 0.02134  | 0.07014  | 56.1151 | 89.1181 | 89.759  | 39.3952 | 29.5687 | 57.3078 | Down |
| Klra2     | 377.6   | 1.41481 | 0.21144 | 6.6912  | 2.21E-11 | 6.56E-10 | 160.605 | 253.939 | 203.39  | 471.706 | 579.758 | 596.203 | Up   |
| Ybx3      | 6649.71 | -0.4525 | 0.13998 | -3.2327 | 0.00123  | 0.00662  | 6783.15 | 8254.44 | 8014.33 | 5603.45 | 6385.79 | 4857.09 | Down |
| Etv6      | 2477.55 | 0.41674 | 0.17709 | 2.35324 | 0.01861  | 0.06315  | 1637.01 | 2180.04 | 2549.54 | 2684.06 | 2651.68 | 3162.99 | Up   |
| Bcl2l14   | 682.72  | 1.80759 | 0.11987 | 15.0798 | 2.20E-51 | 2.26E-48 | 299.925 | 311.434 | 298.878 | 1054.34 | 1012.73 | 1119.01 | Up   |
| Gm38910   | 533.889 | 0.31742 | 0.12713 | 2.49683 | 0.01253  | 0.04596  | 487.621 | 488.712 | 449.75  | 594.038 | 626.223 | 556.992 | Up   |
| Mansc1    | 996.968 | 0.69113 | 0.157   | 4.402   | 1.07E-05 | 0.0001   | 664.674 | 818.353 | 804.966 | 1268.94 | 1045.47 | 1379.41 | Up   |
| Gpr19     | 290.922 | -0.5012 | 0.21234 | -2.3604 | 0.01826  | 0.06216  | 297.023 | 346.89  | 379.089 | 259.179 | 185.86  | 277.491 | Down |
| Cdkn1b    | 5158.72 | -0.2698 | 0.10381 | -2.5991 | 0.00935  | 0.03616  | 6030.44 | 5382.54 | 5505.85 | 4763.71 | 4969.66 | 4300.1  | Down |
| Hebp1     | 1293.4  | 0.97366 | 0.25964 | 3.75    | 0.00018  | 0.00126  | 1257.75 | 805.896 | 554.787 | 1670.15 | 1849.1  | 1622.72 | Up   |
| Gm36640   | 55.8544 | -1.1528 | 0.38418 | -3.0006 | 0.00269  | 0.01282  | 58.0501 | 93.9093 | 79.2553 | 41.4686 | 23.2326 | 39.2106 | Down |
| Emp1      | 13614.3 | -0.3474 | 0.15316 | -2.2683 | 0.02331  | 0.07538  | 15773.2 | 13935   | 16028.7 | 10882.4 | 5463.76 | 10429   | Down |
| Plbd1     | 3285.3  | 0.64611 | 0.1573  | 4.10762 | 4.00E-05 | 0.00034  | 2723.52 | 2769.37 | 2192.41 | 3905.31 | 3431.03 | 4690.2  | Up   |
| Gucy2c    | 105.039 | 0.93317 | 0.4145  | 2.25129 | 0.02437  | 0.07799  | 49.3426 | 55.579  | 111.721 | 137.883 | 88.7061 | 187.005 |      |

|          |         |         |         |         |          |          |         |         |         |         |         |         |      |
|----------|---------|---------|---------|---------|----------|----------|---------|---------|---------|---------|---------|---------|------|
| Pde3a    | 4933.71 | -0.6426 | 0.16909 | -3.8003 | 0.00014  | 0.00105  | 4623.69 | 6590.9  | 6829.32 | 3460.56 | 4179.75 | 3918.05 | Down |
| Slco1a4  | 6.5861  | -3.5619 | 1.20017 | -2.9679 | 0.003    | 0.01407  | 8.70751 | 14.3739 | 13.3684 | 0       | 1.05603 | 2.0108  | Down |
| Slco1a5  | 641.235 | 0.95595 | 0.29808 | 3.20698 | 0.00134  | 0.00714  | 269.933 | 509.794 | 529.005 | 970.366 | 563.918 | 1004.4  | Up   |
| Gys2     | 22.8963 | -6.0325 | 1.33332 | -4.5244 | 6.06E-06 | 6.28E-05 | 25.155  | 95.8259 | 14.3232 | 2.07343 | 0       | 0       | Down |
| Ldhd     | 13710.2 | -0.8573 | 0.21233 | -4.0377 | 5.40E-05 | 0.00044  | 17365.7 | 18641   | 16997.9 | 12383.6 | 6468.16 | 10404.9 | Down |
| Abcc9    | 889.34  | -0.521  | 0.24604 | -2.1177 | 0.0342   | 0.10138  | 908.484 | 1302.27 | 933.875 | 487.256 | 880.725 | 823.423 | Down |
| Etnk1    | 167.938 | 0.86523 | 0.20794 | 4.16103 | 3.17E-05 | 0.00027  | 120.938 | 102.534 | 133.684 | 208.38  | 203.813 | 238.28  | Up   |
| Sox5     | 606.736 | -0.6242 | 0.16234 | -3.8452 | 0.00012  | 0.00089  | 615.331 | 796.313 | 796.372 | 507.991 | 428.746 | 495.663 | Down |
| Lrmp     | 651.788 | 0.36751 | 0.18331 | 2.0048  | 0.04498  | 0.12561  | 666.609 | 603.703 | 437.336 | 726.738 | 784.627 | 691.716 | Up   |
| Casc1    | 1344.53 | -0.885  | 0.23982 | -3.6903 | 0.00022  | 0.00153  | 1436.74 | 1954.85 | 1841.97 | 1111.36 | 608.271 | 1113.98 | Down |
| Lmntd1   | 340.656 | -1.2595 | 0.18748 | -6.7181 | 1.84E-11 | 5.55E-10 | 416.026 | 571.122 | 454.524 | 186.609 | 218.597 | 197.059 | Down |
| Tuba3b   | 4.47424 | -5.5583 | 1.85277 | -3      | 0.0027   | 0.01284  | 2.9025  | 20.1234 | 3.81953 | 0       | 0       | 0       | Down |
| Sspn     | 2076.33 | -0.6683 | 0.16605 | -4.0249 | 5.70E-05 | 0.00046  | 2792.21 | 2905.44 | 1948.92 | 1601.73 | 1624.17 | 1585.52 | Down |
| Pthlh    | 70.6176 | -1.7282 | 0.33843 | -5.1065 | 3.28E-07 | 4.49E-06 | 96.7501 | 125.532 | 103.127 | 43.5421 | 30.6247 | 24.1296 | Down |
| Ergic2   | 1353.17 | 0.34381 | 0.13235 | 2.59767 | 0.00939  | 0.03627  | 1185.19 | 1115.41 | 1277.63 | 1372.61 | 1449.92 | 1718.23 | Up   |
| Tmtc1    | 5428.8  | -0.5747 | 0.11083 | -5.1856 | 2.15E-07 | 3.02E-06 | 7154.67 | 6534.37 | 5799    | 4514.9  | 4338.15 | 4231.73 | Down |
| Caprin2  | 424.057 | -0.5571 | 0.1541  | -3.6155 | 0.0003   | 0.00198  | 498.263 | 479.129 | 537.599 | 318.272 | 319.976 | 391.101 | Down |
| Dennd5b  | 1720.56 | -0.3233 | 0.11648 | -2.7751 | 0.00552  | 0.02355  | 1838.25 | 1768.95 | 2130.34 | 1457.62 | 1560.81 | 1567.42 | Down |
| AU018091 | 36.9635 | 2.08613 | 0.41787 | 4.99227 | 5.97E-07 | 7.77E-06 | 18.3825 | 12.4574 | 11.4586 | 63.2397 | 54.9133 | 61.3295 | Up   |
| Cacng7   | 170.983 | -0.4741 | 0.20773 | -2.2822 | 0.02248  | 0.07306  | 214.785 | 202.193 | 179.518 | 121.296 | 156.292 | 151.816 | Down |
| Cacng6   | 11.6075 | 6.05516 | 1.41355 | 4.28367 | 1.84E-05 | 0.00017  | 0.9675  | 0       | 0       | 24.8812 | 32.7368 | 11.0594 | Up   |
| Leng1    | 621.409 | 0.40187 | 0.1117  | 3.59772 | 0.00032  | 0.00211  | 526.321 | 528.959 | 550.967 | 716.371 | 698.033 | 707.802 | Up   |
| Tmc4     | 4810.61 | 1.51539 | 0.09751 | 15.5404 | 1.85E-54 | 2.49E-51 | 2661.6  | 2515.43 | 2303.18 | 7137.79 | 6861    | 7384.67 | Up   |
| Mboat7   | 2315.51 | 0.3008  | 0.13419 | 2.24152 | 0.02499  | 0.07968  | 2103.35 | 1929.93 | 2191.46 | 2537.88 | 2912.52 | 2217.91 | Up   |
| Pirb     | 2092.25 | 1.68509 | 0.21874 | 7.70372 | 1.32E-14 | 6.27E-13 | 1218.08 | 1070.37 | 689.425 | 2853.04 | 3805.92 | 2916.67 | Up   |
| Gm15922  | 50.3911 | 2.58063 | 0.50309 | 5.1296  | 2.90E-07 | 4.01E-06 | 25.155  | 7.66607 | 10.5037 | 74.6435 | 112.995 | 71.3835 | Up   |
| Gm15448  | 40.1177 | 1.48142 | 0.44087 | 3.36024 | 0.00078  | 0.00452  | 29.025  | 19.1652 | 15.2781 | 65.3131 | 69.6977 | 42.2268 | Up   |
| Pira2    | 31.7493 | 2.92863 | 0.52822 | 5.54433 | 2.95E-08 | 4.88E-07 | 11.61   | 6.70781 | 3.81953 | 47.6889 | 63.3615 | 57.3078 | Up   |
| Lair1    | 620.026 | 1.44681 | 0.2655  | 5.44931 | 5.06E-08 | 8.00E-07 | 477.946 | 303.768 | 216.758 | 872.915 | 1003.22 | 845.542 | Up   |
| Cdc42ep5 | 418.191 | -0.5743 | 0.20223 | -2.8398 | 0.00451  | 0.01991  | 507.938 | 479.129 | 513.727 | 354.557 | 404.458 | 249.339 | Down |
| Lira5    | 1059.23 | 2.28322 | 0.27006 | 8.45437 | 2.81E-17 | 1.95E-15 | 524.386 | 327.724 | 231.082 | 1582.03 | 2062.42 | 1627.74 | Up   |
| Gm15931  | 188.375 | 2.31051 | 0.38663 | 5.97605 | 2.29E-09 | 4.71E-08 | 105.458 | 48.8712 | 35.3307 | 296.501 | 390.729 | 253.361 | Up   |
| Gp6      | 106.868 | -1.3603 | 0.3652  | -3.7247 | 0.0002   | 0.00137  | 102.555 | 226.149 | 132.729 | 47.6889 | 70.7537 | 61.3295 | Down |
| Eps8l1   | 4648.15 | 0.86928 | 0.10863 | 8.0024  | 1.22E-15 | 6.70E-14 | 3099.87 | 3213.04 | 3553.12 | 6515.76 | 5605.38 | 5901.7  | Up   |
| Tnnt1    | 156.38  | -1.9562 | 0.4004  | -4.8857 | 1.03E-06 | 1.27E-05 | 149.963 | 322.933 | 273.097 | 34.2116 | 88.7061 | 69.3727 | Down |
| Tnni3    | 4921.85 | -4.0363 | 0.57834 | -6.9791 | 2.97E-12 | 9.87E-11 | 5656.98 | 15873.6 | 6304.14 | 562.937 | 385.449 | 748.018 | Down |
| Syt5     | 1841.26 | -0.4507 | 0.19641 | -2.2948 | 0.02174  | 0.07122  | 2384.89 | 2116.79 | 1878.25 | 1632.83 | 1142.62 | 1892.16 | Down |
| Ptprh    | 57.3761 | 0.88223 | 0.41172 | 2.1428  | 0.03213  | 0.09656  | 56.1151 | 24.9147 | 40.1051 | 76.717  | 54.9133 | 91.4915 | Up   |
| Ppp6r1   | 7241.9  | 0.36937 | 0.09135 | 4.04339 | 5.27E-05 | 0.00043  | 6813.15 | 6107.94 | 6038.68 | 8069.8  | 8024.74 | 8397.11 | Up   |
| Tmem150  | 106.174 | 1.55933 | 0.28789 | 5.41638 | 6.08E-08 | 9.44E-07 | 57.0826 | 49.8294 | 54.4283 | 152.397 | 200.645 | 122.659 | Up   |
| Tmem238  | 680.666 | 0.34792 | 0.13854 | 2.51122 | 0.01203  | 0.04444  | 632.746 | 563.456 | 600.621 | 812.785 | 806.803 | 667.586 | Up   |
| Shisa7   | 89.8414 | -0.933  | 0.33036 | -2.8241 | 0.00474  | 0.02076  | 144.158 | 117.866 | 91.6688 | 47.6889 | 82.37   | 55.297  | Down |
| Nat14    | 291.174 | -1.0649 | 0.16452 | -6.4725 | 9.64E-11 | 2.56E-09 | 413.123 | 376.596 | 392.457 | 172.095 | 181.636 | 211.134 | Down |
| Ssc5d    | 191.934 | -0.489  | 0.2366  | -2.0669 | 0.03875  | 0.11173  | 262.193 | 180.153 | 230.127 | 191.792 | 142.563 | 144.778 | Down |
| Sbk2     | 308.856 | -1.9131 | 0.47437 | -4.0329 | 5.51E-05 | 0.00045  | 375.391 | 910.346 | 178.563 | 104.708 | 159.46  | 124.67  | Down |
| Sbk3     | 913.349 | -4.3291 | 0.59661 | -7.256  | 3.99E-13 | 1.53E-11 | 1405.78 | 2950.48 | 864.169 | 71.5334 | 65.4736 | 122.659 | Down |
| Ccdc106  | 62.6572 | -0.6952 | 0.32075 | -2.1673 | 0.03021  | 0.09222  | 78.3676 | 82.4102 | 71.6162 | 35.2483 | 57.0254 | 51.2754 | Down |
| Zim1     | 10.3678 | -2.3189 | 1.12103 | -2.0686 | 0.03859  | 0.1114   | 9.67501 | 31.6225 | 10.5037 | 8.29373 | 2.11205 | 0       | Down |
| Peg3     | 538.667 | -1.5369 | 0.21486 | -7.1527 | 8.51E-13 | 3.07E-11 | 639.518 | 895.972 | 867.989 | 339.006 | 270.342 | 219.177 | Down |
| Gm45844  | 108.989 | -2.3925 | 0.30419 | -7.8652 | 3.68E-15 | 1.90E-13 | 183.825 | 160.029 | 205.3   | 38.3585 | 43.297  | 23.1242 | Down |
| Gm6842   | 5.12726 | 2.43442 | 1.16499 | 2.08964 | 0.03665  | 0.10712  | 0.9675  | 2.87478 | 0.95488 | 12.4406 | 9.50423 | 4.0216  | Up   |
| Zfp419   | 13.6627 | 2.22254 | 0.97657 | 2.27587 | 0.02285  | 0.07415  | 10.6425 | 3.83303 | 0       | 25.9179 | 28.5127 | 13.0702 | Up   |
| Zfp606   | 820.678 | -0.3689 | 0.14045 | -2.6263 | 0.00863  | 0.03384  | 885.264 | 909.387 | 980.665 | 682.159 | 644.175 | 822.418 | Down |
| Zscan18  | 492.399 | -0.4488 | 0.15993 | -2.8061 | 0.00502  | 0.02177  | 563.086 | 581.663 | 560.516 | 350.41  | 417.13  | 481.587 | Down |
| Rps5     | 24545.7 | -0.3037 | 0.10431 | -2.9121 | 0.00359  | 0.0164   | 27559.3 | 25667.9 | 28132.8 | 22942.5 | 23251.6 | 19719.9 | Down |
| Zfp446   | 725.702 | -0.322  | 0.11485 | -2.8035 | 0.00506  | 0.02192  | 758.521 | 810.687 | 849.846 | 662.461 | 626.223 | 646.473 | Down |
| Mzf1     | 160.119 | -0.54   | 0.24256 | -2.2264 | 0.02599  | 0.08214  | 178.02  | 212.733 | 178.563 | 153.434 | 98.2104 | 139.751 | Down |
| Zswim9   | 424.231 | -0.4604 | 0.13963 | -3.2971 | 0.00098  | 0.00547  | 494.393 | 498.294 | 481.261 | 389.805 | 355.881 | 325.75  | Down |
| Mrip-ps  | 41.3172 | 1.13074 | 0.47477 | 2.38167 | 0.01723  | 0.0593   | 27.09   | 18.2069 | 32.466  | 48.7256 | 36.9609 | 84.4537 | Up   |
| Selenow  | 5587.81 | -0.4604 | 0.12716 | -3.6204 | 0.00029  | 0.00195  | 6604.17 | 6317.8  | 6493.2  | 4933.73 | 5214.65 | 3963.29 | Down |
| Zfp541   | 3.91073 | 2.83685 | 1.35973 | 2.08634 | 0.03695  | 0.10778  | 0.9675  | 1.91652 | 0       | 7.25701 | 5.28013 | 8.04321 | Up   |
| Meis3    | 832.527 | 0.43294 | 0.13969 | 3.09926 | 0.00194  | 0.00971  | 751.749 | 715.819 | 657.914 | 1024.28 | 1016.95 | 828.45  | Up   |
| Inafm1   | 1351.93 | -0.577  | 0.11664 | -4.9469 | 7.54E-07 | 9.60E-06 | 1549.94 | 1672.16 | 1633.8  | 1075.07 | 1193.31 | 987.304 | Down |
| Ap2s1    | 3285.76 | 0.20021 | 0.09198 | 2.17663 | 0.02951  | 0.09076  | 3044.73 | 2998.39 | 3131.06 | 3615.03 | 3652.79 | 3272.58 | Up   |
| Prkd2    | 4693.03 | -0.3229 | 0.1172  | -2.7552 | 0.00587  | 0.02474  | 4857.82 | 4903.41 | 5886.85 | 3937.45 | 4396.23 | 4176.44 | Down |
| Ptgir    | 428.87  | 1.35352 | 0.24716 | 5.47632 | 4.34E-08 | 6.96E-07 | 302.828 | 210.817 | 210.074 | 620.993 | 774.067 | 454.441 | Up   |
| Calm3    | 13450.5 | 0.4081  | 0.07566 | 5.39396 | 6.89E-08 | 1.06E-06 | 11632.3 | 11852.7 | 11197   | 15679.3 | 15425.4 | 14916.1 | Up   |
| Pnmal2   | 170.979 | -0.9521 | 0.29132 | -3.2682 | 0.00108  | 0.00596  | 247.68  | 190.693 | 237.766 | 131.663 | 144.675 | 73.3943 | Down |
| Ccdc8    | 349.16  | -0.6067 | 0.21169 | -2.8659 | 0.00416  | 0.01857  | 488.588 | 390.011 | 385.773 | 306.868 | 312.584 | 211.134 | Down |
| Hif3a    | 363.679 | -1.659  | 0.30636 | -5.4151 | 6.13E-08 | 9.50E-07 | 458.596 | 678.447 | 520.411 | 205.27  | 97.1543 | 222.194 | Down |
| Psg16    | 12.8637 | -1.5469 | 0.77249 | -2.0024 | 0.04524  | 0.12609  | 7.74001 | 22.9982 | 26.7367 | 8.29373 | 7.39218 | 4.0216  | Down |
| Mill2    | 2835.73 | -1.0356 | 0.13838 | -7.4839 | 7.22E-14 | 3.16E-12 | 3348.52 | 4134.89 | 3952.26 | 1642.16 | 2084.59 | 1851.95 | Down |
| Pglyrp1  | 1882.58 | 1.91434 | 0.47518 | 4.02863 | 5.61E-05 | 0.00045  | 729.496 | 1161.41 | 477.441 | 3699    | 1721.32 | 3506.84 | Up   |
| Nova2    | 1193.76 | -0.7251 | 0.20903 | -3.4691 | 0.00052  | 0.00322  | 1162.94 | 1304.19 | 1995.71 | 893.649 | 846.932 | 959.152 | Down |
| Foxa3    | 35.0258 | 1.05972 | 0.44973 | 2.35638 | 0.01845  | 0.06272  | 18.3825 | 32.5808 | 17.1879 | 42.5053 | 41.185  | 58.3133 | Up   |
| Dmwd     | 2451.71 | -0.7815 | 0.12294 | -6.3571 | 2.06E-10 | 5.20E-09 | 3075.69 | 3000.31 | 3223.68 | 1884.75 | 1969.49 | 1556.36 | Down |
| Dmpk     | 2927.13 | -1.1082 | 0.1987  | -5.5773 | 2.44E-08 | 4.09E-07 | 3511.06 | 5235.93 | 3250.42 | 2130.45 | 1750.89 | 1684.05 | Down |

|            |         |         |         |         |          |          |         |         |         |         |         |         |      |
|------------|---------|---------|---------|---------|----------|----------|---------|---------|---------|---------|---------|---------|------|
| D830036C   | 34.9095 | -1.4292 | 0.46234 | -3.0913 | 0.00199  | 0.00994  | 54.1801 | 65.1616 | 33.4209 | 22.8077 | 14.7844 | 19.1026 | Down |
| Errcc1     | 1033.84 | -0.4001 | 0.1248  | -3.206  | 0.00135  | 0.00716  | 1093.28 | 1193.03 | 1242.3  | 924.751 | 949.367 | 800.299 | Down |
| Cd3eap     | 367.682 | 0.47774 | 0.15972 | 2.99115 | 0.00278  | 0.01318  | 328.95  | 280.77  | 312.247 | 411.576 | 479.436 | 393.112 | Up   |
| Ckm        | 1309.24 | -6.1989 | 1.09741 | -5.6486 | 1.62E-08 | 2.81E-07 | 1251.95 | 5165.01 | 1333.02 | 15.5507 | 8.4482  | 81.4375 | Down |
| Clasrp     | 1966.4  | -0.2779 | 0.09883 | -2.8118 | 0.00493  | 0.02146  | 2152.69 | 2030.55 | 2282.17 | 1801.81 | 1829.04 | 1072.14 | Down |
| Relb       | 1671.21 | 0.61604 | 0.11586 | 5.317   | 1.05E-07 | 1.56E-06 | 1370.95 | 1215.07 | 1373.12 | 1857.79 | 2175.41 | 2034.93 | Up   |
| Clptm1     | 8601.09 | 0.32243 | 0.10574 | 3.04926 | 0.00229  | 0.01118  | 8275.04 | 7344.09 | 7312.49 | 9721.28 | 10167.4 | 8786.2  | Up   |
| Nectin2    | 3366.55 | 0.94703 | 0.13142 | 7.20595 | 5.76E-13 | 2.17E-11 | 2415.85 | 2091.88 | 2391.03 | 4436.11 | 4987.61 | 3876.83 | Up   |
| Bcam       | 36901.3 | 0.66087 | 0.11931 | 5.53896 | 3.04E-08 | 5.02E-07 | 32359.1 | 24859.1 | 28564.4 | 46392   | 44816.7 | 44416.6 | Up   |
| Cblc       | 1348.5  | 1.78813 | 0.15347 | 11.6517 | 2.25E-31 | 5.00E-29 | 595.013 | 622.868 | 598.712 | 2320.17 | 2265.17 | 1689.07 | Up   |
| Bcl3       | 1215.61 | 0.58084 | 0.19843 | 2.92727 | 0.00342  | 0.01575  | 720.789 | 989.881 | 1211.75 | 1294.86 | 1506.95 | 1569.43 | Up   |
| Igsf23     | 75.8333 | -1.1978 | 0.34895 | -3.4325 | 0.0006   | 0.00361  | 98.6851 | 143.739 | 74.4809 | 44.5788 | 42.241  | 51.2754 | Down |
| Ceacam2C   | 13.2624 | 4.30119 | 1.02919 | 4.1792  | 2.93E-05 | 0.00026  | 1.935   | 1.91652 | 0       | 18.6609 | 15.8404 | 41.2214 | Up   |
| Nlrp9b     | 21.9136 | 4.21405 | 0.77243 | 5.45559 | 4.88E-08 | 7.75E-07 | 1.935   | 4.79129 | 0       | 37.3218 | 41.185  | 46.2484 | Up   |
| Zfp109     | 119.71  | 0.79116 | 0.28966 | 2.73137 | 0.00631  | 0.02622  | 94.8151 | 79.5355 | 88.8041 | 147.214 | 109.827 | 198.064 | Up   |
| Zfp61      | 959.211 | 0.35366 | 0.10937 | 3.23365 | 0.00122  | 0.0066   | 889.134 | 790.563 | 846.981 | 119.65  | 1061.31 | 1047.63 | Up   |
| Zfp94      | 299.871 | -0.4258 | 0.17729 | -2.4019 | 0.01631  | 0.05677  | 376.358 | 321.975 | 333.254 | 272.656 | 216.485 | 278.496 | Down |
| Kcnn4      | 404.451 | -0.4493 | 0.15618 | -2.8771 | 0.00401  | 0.01803  | 459.563 | 500.211 | 441.156 | 370.108 | 296.743 | 358.928 | Down |
| Plaur      | 4004.48 | 0.56281 | 0.15555 | 3.61809 | 0.0003   | 0.00197  | 3212.1  | 2877.65 | 3609.46 | 4934.77 | 5461.76 | 3931.12 | Up   |
| AC161166   | 16.8336 | -1.3857 | 0.58137 | -2.3836 | 0.01715  | 0.05907  | 29.025  | 19.1652 | 24.827  | 9.33044 | 11.6163 | 7.03781 | Down |
| Irgq       | 1709.89 | 0.3024  | 0.11008 | 2.74697 | 0.00601  | 0.02522  | 1672.81 | 1469.01 | 1452.38 | 1916.89 | 1784.68 | 1963.55 | Up   |
| Cd177      | 6232.75 | 3.85131 | 1.15646 | 3.33025 | 0.00087  | 0.00494  | 910.419 | 1136.49 | 376.224 | 12407.4 | 749.778 | 21816.2 | Up   |
| Ceacam1C   | 548.159 | 5.26199 | 0.97766 | 5.38221 | 7.36E-08 | 1.12E-06 | 27.09   | 30.6643 | 25.7818 | 1148.68 | 119.331 | 1937.41 | Up   |
| Rps19      | 10127.9 | -0.8239 | 0.14431 | -5.7096 | 1.13E-08 | 2.02E-07 | 13588.6 | 10972.1 | 14270.7 | 7684.14 | 7918.08 | 6334.03 | Down |
| Rabac1     | 11198.9 | -0.4826 | 0.11831 | -4.079  | 4.52E-05 | 0.00037  | 12812.6 | 13014.1 | 13336.8 | 9903.75 | 10122   | 8004    | Down |
| Grik5      | 1236.73 | 0.23769 | 0.10924 | 2.17578 | 0.02957  | 0.09086  | 1183.25 | 1053.13 | 1168.78 | 1391.27 | 1360.16 | 1263.79 | Up   |
| Pafah1b3   | 1199.8  | 0.89153 | 0.13353 | 6.67682 | 2.44E-11 | 7.19E-10 | 905.581 | 812.603 | 803.057 | 1642.16 | 1680.14 | 1355.28 | Up   |
| 4732471J(C | 286.776 | 0.83709 | 0.17053 | 4.90864 | 9.17E-07 | 1.14E-05 | 224.46  | 180.153 | 212.939 | 337.969 | 378.057 | 387.079 | Up   |
| Dmac2      | 1405.32 | -0.346  | 0.11674 | -2.9637 | 0.00304  | 0.01425  | 1697    | 1557.17 | 1464.79 | 1293.82 | 1282.01 | 1137.11 | Down |
| Tgfb1      | 3792.22 | 0.51169 | 0.16189 | 3.16078 | 0.00157  | 0.00815  | 3384.32 | 2928.44 | 3067.08 | 4254.68 | 5449.09 | 3669.71 | Up   |
| Axl        | 6796.93 | 0.91516 | 0.16185 | 5.65434 | 1.56E-08 | 2.73E-07 | 5380.28 | 4615.93 | 4135.6  | 8236.71 | 10678.5 | 7734.55 | Up   |
| Cyp2s1     | 16001.6 | -0.7684 | 0.20753 | -3.7027 | 0.00021  | 0.00147  | 18465.7 | 20989.7 | 21039.9 | 14333.6 | 7922.3  | 13258.2 | Down |
| Cyp2a4     | 203.298 | 1.7744  | 0.49208 | 3.60589 | 0.00031  | 0.00205  | 125.775 | 80.4937 | 69.7065 | 283.023 | 109.827 | 550.96  | Up   |
| Cyp2b19    | 159.859 | -1.7227 | 0.31669 | -5.4396 | 5.34E-08 | 8.43E-07 | 228.33  | 254.897 | 253.044 | 92.2677 | 40.129  | 90.4861 | Down |
| Cyp2g1     | 59.7954 | -2.0432 | 0.36872 | -5.5415 | 3.00E-08 | 4.95E-07 | 80.3026 | 89.1181 | 119.36  | 26.9546 | 16.8964 | 26.1404 | Down |
| Cyp2f2     | 107674  | -1.4023 | 0.19028 | -7.37   | 1.71E-13 | 7.00E-12 | 155440  | 160530  | 152751  | 69793.8 | 41148   | 66382.6 | Down |
| Numbl      | 1081.05 | -0.5806 | 0.14033 | -4.1375 | 3.51E-05 | 0.0003   | 1427.06 | 1128.83 | 1331.11 | 920.604 | 895.51  | 783.207 | Down |
| Ltpb4      | 22964.6 | -0.9593 | 0.49664 | -6.2902 | 3.17E-10 | 7.68E-09 | 26545.3 | 28112.4 | 28251.2 | 18974   | 19171.1 | 16733.9 | Down |
| Shkbp1     | 1560.76 | 0.59936 | 0.14463 | 4.14418 | 3.41E-05 | 0.00029  | 1384.49 | 1162.37 | 1176.42 | 1856.76 | 2142.68 | 1641.82 | Up   |
| Sptbn4     | 30.1271 | 0.85525 | 0.43368 | 1.97209 | 0.0486   | 0.13354  | 26.1225 | 17.2487 | 21.0074 | 33.1749 | 36.9609 | 46.2484 | Up   |
| Blvrbl     | 1363.32 | 0.48298 | 0.20816 | 2.32024 | 0.02033  | 0.06756  | 1455.12 | 1072.29 | 884.222 | 1642.16 | 1811.08 | 1315.06 | Up   |
| Prx        | 9641.3  | -0.3539 | 0.15089 | -2.3457 | 0.01899  | 0.06413  | 9468.94 | 9796.28 | 13188.8 | 7845.87 | 8884.34 | 8663.54 | Down |
| Pld3       | 8910.24 | 1.51579 | 0.1785  | 8.49188 | 2.03E-17 | 1.43E-15 | 5646.34 | 4351.45 | 3853.91 | 13053.3 | 15410.6 | 11145.9 | Up   |
| Akt2       | 7592.1  | 0.21498 | 0.09179 | 2.3422  | 0.01917  | 0.06458  | 7218.53 | 6974.21 | 6889.48 | 8069.8  | 8755.51 | 7645.07 | Up   |
| Zfp607b    | 127.686 | -0.6292 | 0.26334 | -2.3895 | 0.01687  | 0.05836  | 132.548 | 145.655 | 187.157 | 111.965 | 79.2019 | 109.589 | Down |
| Zfp60      | 1034.96 | -0.2322 | 0.11145 | -2.0833 | 0.03723  | 0.10837  | 1081.67 | 1061.75 | 1210.79 | 921.64  | 954.647 | 979.26  | Down |
| Zfp626     | 814.301 | -0.3545 | 0.11184 | -3.1695 | 0.00153  | 0.00795  | 946.216 | 849.017 | 946.289 | 721.554 | 714.929 | 707.802 | Down |
| Zfp780b    | 685.798 | -0.2809 | 0.12585 | -2.2316 | 0.02564  | 0.08121  | 820.441 | 685.155 | 751.493 | 609.589 | 616.719 | 631.392 | Down |
| Fcgbp      | 1118.09 | 2.43187 | 0.29392 | 8.27402 | 1.30E-16 | 8.09E-15 | 257.355 | 522.251 | 269.277 | 2037.15 | 1343.26 | 2279.24 | Up   |
| Eid2b      | 442.452 | -0.3056 | 0.13524 | -2.26   | 0.02382  | 0.07665  | 495.361 | 506.919 | 465.028 | 393.952 | 423.466 | 369.988 | Down |
| Dli3       | 5.90852 | -5.9596 | 1.61154 | -3.6981 | 0.00022  | 0.00149  | 4.83751 | 16.2904 | 14.3232 | 0       | 0       | 0       | Down |
| Supt5      | 1799.5  | 0.33307 | 0.14142 | 2.35512 | 0.01852  | 0.06287  | 1759.89 | 1347.31 | 1671.05 | 2041.29 | 1826.92 | 2150.55 | Up   |
| Rps16      | 15471.9 | -0.267  | 0.12909 | -2.0681 | 0.03863  | 0.11148  | 17224.4 | 15211.4 | 18262.1 | 14986.8 | 15012.5 | 12134.2 | Down |
| Paf1       | 4202.41 | -0.2547 | 0.10219 | -2.4919 | 0.01271  | 0.04646  | 4161.22 | 4704.09 | 4851.76 | 3902.2  | 3657.02 | 3938.16 | Down |
| Fbxo27     | 59.7952 | -0.856  | 0.37826 | -2.2631 | 0.02363  | 0.07616  | 54.1801 | 86.2433 | 90.7139 | 31.1015 | 42.241  | 54.2916 | Down |
| Echl       | 6499.34 | -0.5095 | 0.17229 | -2.9576 | 0.0031   | 0.01449  | 6991.17 | 9359.31 | 6555.27 | 5949.71 | 5622.28 | 4518.27 | Down |
| Lgals4     | 881.461 | -1.0921 | 0.13321 | -8.1979 | 2.45E-16 | 1.47E-14 | 1123.27 | 1292.69 | 1184.05 | 629.287 | 519.564 | 539.9   | Down |
| Actn4      | 16256.9 | 0.32289 | 0.0985  | 3.27791 | 0.00105  | 0.00578  | 14738.9 | 13261.3 | 15335.4 | 17983.9 | 19011.6 | 17210.5 | Up   |
| Rasgrp4    | 551.87  | 0.67248 | 0.22646 | 2.99351 | 0.00276  | 0.01309  | 551.476 | 363.18  | 361.901 | 612.699 | 824.756 | 597.208 | Up   |
| Fam98c     | 637.25  | 0.30814 | 0.1174  | 2.62475 | 0.00867  | 0.03396  | 588.241 | 536.625 | 583.433 | 720.518 | 717.041 | 677.64  | Up   |
| Spred3     | 327.073 | 0.86253 | 0.22254 | 3.87584 | 0.00011  | 0.0008   | 266.063 | 205.067 | 225.352 | 369.071 | 357.993 | 538.895 | Up   |
| Psmid8     | 6779.33 | 0.3766  | 0.09166 | 4.10845 | 3.98E-05 | 0.00034  | 5816.62 | 6251.68 | 5629.99 | 7806.47 | 7921.25 | 7249.95 | Up   |
| Catsperg1  | 362.487 | -0.6862 | 0.15761 | -4.3535 | 1.34E-05 | 0.00013  | 458.596 | 401.51  | 481.261 | 253.995 | 281.959 | 297.599 | Down |
| Kcnk6      | 1287.18 | 0.66909 | 0.1175  | 5.69462 | 1.24E-08 | 2.20E-07 | 1042    | 919.928 | 1019.81 | 1471.1  | 1712.87 | 1557.37 | Up   |
| 2200002D   | 258.131 | 0.48244 | 0.16656 | 2.8964  | 0.00377  | 0.01712  | 204.143 | 213.692 | 228.217 | 330.712 | 292.519 | 279.501 | Up   |
| Spint2     | 18492.4 | 0.44785 | 0.09918 | 4.51541 | 6.32E-06 | 6.52E-05 | 15136.6 | 15648.4 | 16149.9 | 23464   | 20067.7 | 20488.1 | Up   |
| Ppp1r14a   | 1701.77 | -1.0391 | 0.21788 | -4.7689 | 1.85E-06 | 2.15E-05 | 2026.92 | 2378.4  | 2462.64 | 1255.46 | 1342.21 | 745.002 | Down |
| Sipa1l3    | 4132.73 | 0.37638 | 0.09874 | 3.81173 | 0.00014  | 0.00101  | 3351.43 | 3513.93 | 3924.57 | 4651.74 | 4748.95 | 4605.74 | Up   |
| Zfp420     | 586.309 | -0.5813 | 0.14217 | -4.0887 | 4.34E-05 | 0.00036  | 714.016 | 623.826 | 770.59  | 465.485 | 500.556 | 443.382 | Down |
| Zfp568     | 1239.46 | 0.3016  | 0.10854 | 2.77884 | 0.00546  | 0.02331  | 1060.38 | 1115.41 | 1155.41 | 1280.34 | 1364.38 | 1460.85 | Up   |
| Cox7a1     | 188.868 | -2.7261 | 0.47031 | -5.7964 | 6.78E-09 | 1.27E-07 | 206.078 | 571.122 | 207.21  | 25.9179 | 67.5856 | 55.297  | Down |
| Capns1     | 19824.4 | 0.2034  | 0.09846 | 2.06577 | 0.03885  | 0.11196  | 17995.5 | 18711   | 18581.1 | 21801.1 | 22695   | 19162.9 | Up   |
| Clip3      | 289.234 | -0.7405 | 0.24107 | -3.0715 | 0.00213  | 0.0105   | 410.221 | 301.851 | 373.359 | 204.233 | 279.847 | 165.891 | Down |
| Tyrobp     | 2456.87 | 1.49325 | 0.25701 | 5.81018 | 6.24E-09 | 1.18E-07 | 1741.5  | 1237.11 | 885.176 | 3492.7  | 4594.77 | 2789.99 | Up   |
| Nfkbid     | 389.183 | 0.76254 | 0.23241 | 3.28095 | 0.00103  | 0.00573  | 354.106 | 268.312 | 243.495 | 465.485 | 614.607 | 389.09  | Up   |
| Hspb6      | 1298.11 | -1.6486 | 0.51567 | -3.1971 | 0.00139  | 0.00735  | 1154.23 | 3395.11 | 1355.93 | 647.947 | 499.5   | 735.953 | Down |
| Upk1a      | 140.424 | -1.9022 | 0.3583  | -5.3091 | 1.10E-07 | 1.62E-06 | 334.756 | 140.864 |         |         |         |         |      |

|          |         |         |         |         |          |          |         |         |         |         |         |         |      |
|----------|---------|---------|---------|---------|----------|----------|---------|---------|---------|---------|---------|---------|------|
| Fxyd5    | 5014.59 | 0.77451 | 0.1466  | 5.283   | 1.27E-07 | 1.85E-06 | 3807.12 | 3560.89 | 3731.68 | 6266.95 | 7498.84 | 5222.05 | Up   |
| Fxyd7    | 151.921 | -1.5777 | 0.32129 | -4.9104 | 9.09E-07 | 1.13E-05 | 152.865 | 227.107 | 302.698 | 88.1208 | 83.426  | 57.3078 | Down |
| Fxyd1    | 2011.47 | -1.3696 | 0.13366 | -10.247 | 1.22E-24 | 1.57E-22 | 2519.37 | 3236.04 | 2945.81 | 1080.26 | 1217.6  | 1069.75 | Down |
| Hpn      | 1380.59 | 0.61625 | 0.12883 | 4.78359 | 1.72E-06 | 2.02E-05 | 1163.9  | 1138.41 | 968.251 | 1761.38 | 1513.28 | 1738.34 | Up   |
| Gm12762  | 39.0838 | 1.37665 | 0.67298 | 2.04559 | 0.0408   | 0.11631  | 12.5775 | 37.3721 | 15.2781 | 43.5421 | 22.1765 | 103.556 | Up   |
| Gm12766  | 121.669 | 0.64977 | 0.25581 | 2.54001 | 0.01108  | 0.04159  | 85.1401 | 117.866 | 81.165  | 129.589 | 158.404 | 157.848 | Up   |
| Kctd15   | 921.831 | -0.5164 | 0.12614 | -4.0942 | 4.24E-05 | 0.00035  | 1161    | 1097.21 | 996.898 | 743.325 | 824.756 | 707.802 | Down |
| Chst8    | 299.644 | -0.554  | 0.27455 | -2.0179 | 0.0436   | 0.12264  | 357.96  | 253.939 | 457.389 | 239.481 | 303.079 | 185.999 | Down |
| Cebpa    | 7632.71 | 0.68444 | 0.18454 | 3.70888 | 0.00021  | 0.00144  | 7179.83 | 5126.68 | 5259.49 | 10311.2 | 10461   | 7458.06 | Up   |
| Slc7a10  | 1885.87 | -1.1406 | 0.1675  | -6.8097 | 9.78E-12 | 3.06E-10 | 2107.22 | 2530.76 | 3146.34 | 1191.19 | 1261.95 | 1077.79 | Down |
| Lrp3     | 663.174 | -0.4736 | 0.1181  | -4.0104 | 6.06E-05 | 0.00049  | 782.709 | 735.943 | 794.463 | 585.744 | 553.357 | 526.83  | Down |
| Gpatch1  | 1110.52 | -0.2645 | 0.10745 | -2.4619 | 0.01382  | 0.04978  | 1117.46 | 1265.86 | 1252.81 | 1007.69 | 994.776 | 1024.5  | Down |
| Cep89    | 971.112 | -0.5803 | 0.11896 | -4.8781 | 1.07E-06 | 1.31E-05 | 1118.43 | 1187.28 | 1185.96 | 799.308 | 701.201 | 834.483 | Down |
| Nudt19   | 888.211 | -0.3951 | 0.1278  | -3.0918 | 0.00199  | 0.00993  | 955.891 | 1125.95 | 945.334 | 807.602 | 764.562 | 729.921 | Down |
| Pdcd5    | 1005.72 | -0.529  | 0.15383 | -3.4391 | 0.00058  | 0.00354  | 1124.24 | 1092.41 | 1347.34 | 863.584 | 903.958 | 702.775 | Down |
| Zfp536   | 27.5909 | -1.7453 | 0.53278 | -3.2758 | 0.00105  | 0.00582  | 28.0575 | 56.5373 | 42.9697 | 12.4406 | 8.4482  | 17.0918 | Down |
| Uri1     | 3579.29 | 0.25565 | 0.08864 | 2.88412 | 0.00393  | 0.01769  | 3327.24 | 3282.04 | 3179.76 | 3663.75 | 3981.22 | 4041.71 | Up   |
| Gm30684  | 23.0584 | 3.7462  | 0.66897 | 5.59992 | 2.14E-08 | 3.63E-07 | 1.935   | 4.79129 | 2.86465 | 51.8358 | 31.6808 | 45.243  | Up   |
| Ccne1    | 124.641 | 0.94494 | 0.27274 | 3.4646  | 0.00053  | 0.00326  | 108.36  | 86.2433 | 61.1125 | 152.397 | 165.796 | 173.934 | Up   |
| Plekhf1  | 469.337 | -0.6695 | 0.16266 | -4.1158 | 3.86E-05 | 0.00033  | 534.061 | 662.157 | 532.825 | 388.768 | 324.2   | 374.009 | Down |
| Zfp939   | 250.482 | -0.4561 | 0.19385 | -2.353  | 0.01862  | 0.06316  | 313.47  | 260.646 | 295.059 | 182.462 | 248.166 | 203.091 | Down |
| Gm37494  | 3153.53 | -0.3407 | 0.12946 | -2.6314 | 0.0085   | 0.03341  | 3370.78 | 3281.08 | 3920.75 | 2530.62 | 2699.2  | 3118.75 | Down |
| Vstm2b   | 66.2574 | -0.9373 | 0.39527 | -2.3713 | 0.01773  | 0.06069  | 80.3026 | 104.45  | 76.3906 | 24.8812 | 61.2495 | 50.27   | Down |
| Al987944 | 940.55  | 0.31781 | 0.10128 | 3.13799 | 0.0017   | 0.00869  | 862.044 | 825.061 | 825.019 | 1011.83 | 1068.7  | 1050.64 | Up   |
| Gm9294   | 131.401 | -0.6168 | 0.27531 | -2.2403 | 0.02507  | 0.07988  | 164.475 | 120.741 | 191.931 | 88.1208 | 124.611 | 98.5293 | Down |
| Siglecf  | 852.448 | 2.16827 | 0.54757 | 3.95981 | 7.50E-05 | 0.00059  | 500.198 | 264.479 | 166.15  | 1240.95 | 1952.59 | 990.32  | Up   |
| Nkg7     | 271.394 | -0.9364 | 0.2791  | -3.355  | 0.00079  | 0.00458  | 314.438 | 442.715 | 312.247 | 130.626 | 252.39  | 175.945 | Down |
| Cd33     | 2021.17 | 1.49516 | 0.20572 | 7.26794 | 3.65E-13 | 1.41E-11 | 1396.1  | 955.384 | 824.064 | 2606.3  | 3357.1  | 2988.05 | Up   |
| Siglece  | 296.987 | 0.94413 | 0.24659 | 3.82878 | 0.00013  | 0.00095  | 256.388 | 204.109 | 148.962 | 315.162 | 434.026 | 423.274 | Up   |
| Klk14    | 156.951 | 1.41755 | 0.30881 | 4.59032 | 4.43E-06 | 4.74E-05 | 107.393 | 48.8712 | 100.263 | 210.453 | 234.438 | 240.291 | Up   |
| Klk8     | 407.853 | -0.5044 | 0.2255  | -2.237  | 0.02528  | 0.08042  | 506.003 | 574.955 | 354.262 | 369.071 | 364.329 | 278.496 | Down |
| Klk1b3   | 8.19956 | 2.6662  | 1.30668 | 2.04044 | 0.04131  | 0.11749  | 0       | 0       | 6.68418 | 17.6242 | 15.8404 | 9.04861 | Up   |
| Shank1   | 77.4515 | -1.3241 | 0.37695 | -3.5126 | 0.00044  | 0.0028   | 97.7176 | 89.1181 | 145.142 | 33.1749 | 63.3615 | 36.1944 | Down |
| 1700008C | 21.6915 | 1.10523 | 0.47966 | 2.30419 | 0.02121  | 0.06982  | 14.5125 | 13.4156 | 13.3684 | 32.1382 | 29.5687 | 27.1458 | Up   |
| Lrrc4b   | 47.0954 | -1.9273 | 0.50116 | -3.8457 | 0.00012  | 0.00089  | 83.2051 | 49.8294 | 90.7139 | 8.29373 | 26.4006 | 24.1296 | Down |
| Josd2    | 2031.15 | -0.3019 | 0.13325 | -2.266  | 0.02345  | 0.07574  | 2207.84 | 2541.3  | 1979.47 | 1819.44 | 1956.82 | 1682.04 | Down |
| 5430431A | 110.023 | -2.2986 | 0.64529 | -3.5621 | 0.00037  | 0.00237  | 88.0426 | 386.178 | 74.4809 | 25.9179 | 22.1765 | 63.3403 | Down |
| Mybpc2   | 381.858 | 2.38282 | 0.26295 | 9.06184 | 1.28E-19 | 1.08E-17 | 110.295 | 152.363 | 105.992 | 485.183 | 578.702 | 858.612 | Up   |
| Napsa    | 112.565 | 2.15257 | 0.33262 | 6.47164 | 9.69E-11 | 2.57E-09 | 60.9526 | 26.8312 | 36.2855 | 173.132 | 171.076 | 207.113 | Up   |
| Kcnc3    | 1792.51 | 1.28603 | 0.11357 | 11.3237 | 1.00E-29 | 1.96E-27 | 976.209 | 1103.91 | 1047.51 | 2430.06 | 2777.35 | 2420    | Up   |
| Vrk3     | 2756.77 | 0.32713 | 0.10192 | 3.2098  | 0.00133  | 0.00709  | 2377.15 | 2622.75 | 2336.6  | 3116.37 | 3210.32 | 2877.46 | Up   |
| Atf5     | 3145.15 | -0.8712 | 0.18618 | -4.6794 | 2.88E-06 | 3.21E-05 | 4212.5  | 4198.13 | 3789.93 | 2515.07 | 2557.69 | 1597.58 | Down |
| Ap2a1    | 2271.96 | 0.38118 | 0.12002 | 3.17593 | 0.00149  | 0.00781  | 2216.55 | 1928.97 | 1775.13 | 2641.55 | 2628.45 | 2441.11 | Up   |
| Prrg2    | 1465.89 | 0.42301 | 0.1135  | 3.72707 | 0.00019  | 0.00136  | 1353.53 | 1227.53 | 1176.42 | 1762.42 | 1717.1  | 1558.37 | Up   |
| Rcn3     | 1793.37 | -0.5533 | 0.15098 | -3.6645 | 0.00025  | 0.00167  | 2155.59 | 2469.43 | 1774.17 | 1525.01 | 1505.89 | 1330.15 | Down |
| Slc17a7  | 394.991 | -5.7025 | 1.23603 | -4.6136 | 3.96E-06 | 4.29E-05 | 383.131 | 1621.37 | 320.841 | 2.07343 | 6.33615 | 36.1944 | Down |
| Gfy      | 68.4055 | -2.4895 | 0.34745 | -7.1652 | 7.77E-13 | 2.83E-11 | 101.588 | 107.325 | 139.413 | 23.8445 | 22.1765 | 16.0864 | Down |
| Ccdc155  | 440.631 | -2.0664 | 0.1477  | -13.991 | 1.78E-44 | 1.13E-41 | 697.569 | 733.068 | 703.749 | 183.499 | 149.956 | 175.945 | Down |
| Dkl1     | 302.875 | -0.7748 | 0.20316 | -3.8135 | 0.00014  | 0.001    | 427.636 | 363.18  | 356.171 | 174.168 | 239.718 | 256.377 | Down |
| Tead2    | 860.276 | -0.4743 | 0.1391  | -3.4099 | 0.00065  | 0.00388  | 1084.57 | 865.308 | 1051.33 | 750.582 | 740.274 | 669.597 | Down |
| Trpm4    | 3001.15 | 0.24741 | 0.09167 | 2.69897 | 0.00696  | 0.02838  | 2720.61 | 2774.16 | 2738.6  | 3471.96 | 3077.26 | 3224.32 | Up   |
| Hrc      | 757.609 | -5.2532 | 0.88418 | -5.9413 | 2.83E-09 | 5.74E-08 | 933.639 | 2744.45 | 751.493 | 27.9913 | 12.6723 | 75.4051 | Down |
| Ppfia3   | 137.691 | 1.02772 | 0.27884 | 3.68569 | 0.00023  | 0.00156  | 97.7176 | 108.283 | 65.8869 | 223.931 | 158.404 | 171.924 | Up   |
| Ntf5     | 410.659 | 0.89275 | 0.14817 | 6.02527 | 1.69E-09 | 3.56E-08 | 302.828 | 281.728 | 277.871 | 545.313 | 577.646 | 478.571 | Up   |
| Ruvbl2   | 3543.49 | -0.3869 | 0.11663 | -3.3172 | 0.00091  | 0.00515  | 3657.16 | 4263.29 | 4127    | 3288.46 | 2773.12 | 3151.93 | Down |
| Gys1     | 2678.99 | 0.55441 | 0.13029 | 4.25508 | 2.09E-05 | 0.00019  | 2113.02 | 2511.6  | 1886.85 | 3210.71 | 3138.51 | 3213.26 | Up   |
| Ftl1     | 44842.9 | 0.42887 | 0.18526 | 2.31492 | 0.02062  | 0.06832  | 47193.8 | 33495.9 | 33989.1 | 51414.9 | 61080.5 | 41883   | Up   |
| Bcat2    | 2511    | -0.4325 | 0.10717 | -4.0352 | 5.45E-05 | 0.00044  | 2793.18 | 2757.87 | 3102.41 | 2272.48 | 2156.4  | 1983.66 | Down |
| Fut1     | 21.5422 | 2.89087 | 0.80275 | 3.6012  | 0.00032  | 0.00208  | 3.87001 | 5.74955 | 5.7293  | 77.7537 | 20.0645 | 16.0864 | Up   |
| Rasip1   | 2212.34 | -0.5225 | 0.14568 | -3.5865 | 0.00034  | 0.00219  | 2496.15 | 2278.74 | 3050.85 | 1691.92 | 1959.94 | 1759.45 | Down |
| Fut2     | 251.543 | 1.582   | 0.44128 | 3.58504 | 0.00034  | 0.0022   | 61.9201 | 240.523 | 75.4357 | 375.291 | 378.057 | 378.031 | Up   |
| Sec1     | 286.566 | 2.67455 | 0.35851 | 7.46014 | 8.64E-14 | 3.71E-12 | 117.068 | 78.5772 | 37.2404 | 433.347 | 618.831 | 434.333 | Up   |
| Car11    | 231.814 | -0.6702 | 0.31475 | -2.1293 | 0.03323  | 0.0991   | 355.073 | 160.987 | 338.029 | 162.764 | 210.149 | 163.88  | Down |
| Fam83e   | 1615.8  | 2.1811  | 0.26106 | 8.3549  | 6.55E-17 | 4.28E-15 | 440.213 | 885.431 | 425.878 | 2663.32 | 2675.97 | 2603.99 | Up   |
| Sult2b1  | 193.384 | 0.66555 | 0.24313 | 2.73741 | 0.00619  | 0.02585  | 174.15  | 158.113 | 116.496 | 249.849 | 193.253 | 268.442 | Up   |
| Kcnj14   | 28.0265 | -2.3257 | 0.51176 | -4.5445 | 5.51E-06 | 5.76E-05 | 41.6026 | 49.8294 | 48.699  | 12.4406 | 10.5603 | 5.027   | Down |
| Kcnj11   | 217.016 | -2.512  | 0.88074 | -2.8522 | 0.00434  | 0.01925  | 165.443 | 809.729 | 132.729 | 82.9373 | 34.8488 | 76.4105 | Down |
| Tph1     | 13.5064 | 2.21408 | 1.09285 | 2.02596 | 0.04277  | 0.12072  | 0       | 12.4574 | 1.90977 | 26.9546 | 10.5603 | 29.1566 | Up   |
| Saa3     | 787.796 | 4.40977 | 0.30982 | 14.2331 | 5.71E-46 | 3.97E-43 | 95.7826 | 45.9964 | 70.6613 | 1506.35 | 982.104 | 2025.88 | Up   |
| Saa4     | 13.4158 | 3.98123 | 1.13656 | 3.50287 | 0.00046  | 0.00289  | 0       | 4.79129 | 0       | 19.6976 | 14.7844 | 41.2214 | Up   |
| Saa1     | 14.4759 | 2.71015 | 0.86852 | 3.12042 | 0.00181  | 0.00915  | 3.87001 | 0       | 7.63906 | 31.1015 | 21.1205 | 23.1242 | Up   |
| Ldha     | 25613.7 | 0.55305 | 0.09856 | 5.61145 | 2.01E-08 | 3.41E-07 | 19374.2 | 22751.9 | 20164.3 | 30513.7 | 31485.4 | 29392.9 | Up   |
| Uevld    | 962.656 | 0.33032 | 0.15781 | 2.09308 | 0.03634  | 0.10638  | 1022.65 | 775.231 | 761.042 | 999.394 | 1063.42 | 1154.2  | Up   |
| Tmem86a  | 911.984 | 0.45573 | 0.2304  | 1.97798 | 0.04793  | 0.13209  | 1005.23 | 710.07  | 592.027 | 1142.46 | 1200.7  | 821.413 | Up   |
| Ptpn5    | 68.8434 | 1.1751  | 0.34592 | 3.39705 | 0.00068  | 0.00403  | 48.3751 | 26.8312 | 51.5637 | 87.0841 | 107.715 | 91.4915 | Up   |
| Gm44969  | 6.34898 | 6.16824 | 1.51856 | 4.06191 | 4.87E-05 | 0.0004   | 0       | 0       | 0       | 14.514  | 9.50423 | 14.0756 | Up   |
| Zdhhc13  | 1390.42 | 0.31658 | 0.09225 | 3.43175 | 0.0006   | 0.00361  | 1273.23 | 1250.53 | 1191.69 |         |         |         |      |

|          |         |         |         |         |          |          |         |         |         |         |         |         |      |
|----------|---------|---------|---------|---------|----------|----------|---------|---------|---------|---------|---------|---------|------|
| Cyip1    | 6572.3  | 0.22657 | 0.10654 | 2.12655 | 0.03346  | 0.09962  | 6116.54 | 5610.6  | 6444.5  | 6831.96 | 7711.1  | 6719.09 | Up   |
| Nipa2    | 1995.83 | 0.94504 | 0.10717 | 8.81846 | 1.16E-18 | 9.07E-17 | 1390.3  | 1355.94 | 1347.34 | 2446.65 | 2885.06 | 2549.7  | Up   |
| Atp10a   | 1847.67 | 0.7774  | 0.13185 | 5.89625 | 3.72E-09 | 7.39E-08 | 1406.75 | 1451.76 | 1226.07 | 2200.95 | 2635.84 | 2164.63 | Up   |
| Ube3a    | 1255.15 | 0.26851 | 0.13201 | 2.03409 | 0.04194  | 0.11898  | 1147.46 | 1063.67 | 1205.06 | 1211.92 | 1367.55 | 1535.25 | Up   |
| Snhg14   | 530.997 | -0.4066 | 0.15922 | -2.5538 | 0.01065  | 0.0403   | 530.191 | 709.111 | 576.749 | 460.302 | 435.082 | 474.549 | Down |
| Gm10297  | 372.88  | -0.4039 | 0.13341 | -3.0274 | 0.00247  | 0.01191  | 425.701 | 438.882 | 409.645 | 320.345 | 319.976 | 322.734 | Down |
| Klf13    | 6043.79 | -0.2569 | 0.08161 | -3.1481 | 0.00164  | 0.00846  | 6674.79 | 6334.09 | 6732.88 | 5581.68 | 5295.97 | 5643.32 | Down |
| Gm32633  | 420.732 | 0.53004 | 0.18251 | 2.90412 | 0.00368  | 0.01675  | 419.896 | 293.227 | 319.886 | 469.632 | 487.884 | 533.868 | Up   |
| Fan1     | 316.157 | 0.39648 | 0.19885 | 1.99388 | 0.04617  | 0.12814  | 286.38  | 223.274 | 309.382 | 316.198 | 348.488 | 413.22  | Up   |
| Mcee     | 1660.08 | -0.4054 | 0.1341  | -3.0227 | 0.00251  | 0.01207  | 1763.76 | 2038.22 | 1873.48 | 1573.73 | 1231.33 | 1479.95 | Down |
| Apba2    | 92.2007 | -0.809  | 0.30333 | -2.667  | 0.00765  | 0.03066  | 99.6527 | 135.114 | 117.451 | 47.6889 | 72.8658 | 80.4321 | Down |
| Pcsk6    | 242.371 | -0.8327 | 0.24954 | -3.3369 | 0.00085  | 0.00484  | 322.178 | 312.392 | 296.969 | 162.764 | 125.667 | 234.258 | Down |
| Snrpa1   | 1302.74 | -0.3515 | 0.11603 | -3.029  | 0.00245  | 0.01185  | 1449.32 | 1352.1  | 1580.33 | 1143.5  | 1214.43 | 1076.78 | Down |
| Chsy1    | 1328.94 | 0.58589 | 0.1508  | 3.88514 | 0.0001   | 0.00077  | 1260.65 | 983.173 | 944.379 | 1648.38 | 1682.25 | 1454.82 | Up   |
| Lrrk1    | 4439.04 | 0.31145 | 0.11631 | 2.67782 | 0.00741  | 0.02988  | 4301.51 | 3513.93 | 4069.71 | 4746.09 | 5269.57 | 4733.43 | Up   |
| Aldh1a3  | 87.4026 | -1.5958 | 0.3565  | -4.4765 | 7.59E-06 | 7.71E-05 | 147.06  | 163.862 | 83.0748 | 46.6522 | 48.5772 | 35.189  | Down |
| Cers3    | 88.6006 | 1.37622 | 0.29745 | 4.62678 | 3.71E-06 | 4.05E-05 | 40.6351 | 58.4538 | 48.699  | 109.892 | 156.292 | 117.632 | Up   |
| Adamts17 | 282.498 | -1.6271 | 0.36683 | -4.4355 | 9.18E-06 | 9.10E-05 | 197.37  | 596.037 | 486.99  | 158.618 | 138.339 | 117.632 | Down |
| Igf1r    | 4453.39 | -0.6954 | 0.08358 | -8.32   | 8.80E-17 | 5.61E-15 | 5331.9  | 5572.27 | 5614.71 | 3257.36 | 3518.68 | 3425.4  | Down |
| Pgpep1l  | 32.6774 | -1.4386 | 0.65456 | -2.1978 | 0.02797  | 0.08709  | 49.3426 | 78.5772 | 15.2781 | 12.4406 | 25.3446 | 15.081  | Down |
| Gm44889  | 2.9217  | 5.04816 | 2.47186 | 2.04225 | 0.04113  | 0.1171   | 0       | 0       | 0       | 14.514  | 0       | 3.0162  | Up   |
| Gm29683  | 151.874 | -1.1061 | 0.24291 | -4.5534 | 5.28E-06 | 5.54E-05 | 213.818 | 182.069 | 226.307 | 73.6068 | 110.883 | 104.562 | Down |
| Nr2f2    | 4323    | -0.209  | 0.10441 | -2.0015 | 0.04534  | 0.12631  | 4638.2  | 4619.76 | 4648.37 | 4043.19 | 4374.06 | 3614.42 | Down |
| B130024G | 356.486 | -0.5896 | 0.2177  | -2.7083 | 0.00676  | 0.02772  | 367.651 | 429.3   | 487.945 | 221.857 | 351.656 | 280.507 | Down |
| Gm44808  | 93.836  | -1.154  | 0.3616  | -3.1913 | 0.00142  | 0.00747  | 97.7176 | 161.946 | 128.909 | 58.0561 | 36.9609 | 79.4267 | Down |
| Rgma     | 822.64  | -0.3733 | 0.18065 | -2.0662 | 0.03881  | 0.11186  | 1161.97 | 845.184 | 778.23  | 739.178 | 748.722 | 662.559 | Down |
| 1810026B | 352.992 | -0.4856 | 0.15917 | -3.0511 | 0.00228  | 0.01113  | 384.098 | 421.634 | 429.697 | 265.399 | 331.592 | 285.534 | Down |
| Slco3a1  | 7706.69 | -0.4554 | 0.11088 | -4.107  | 4.01E-05 | 0.00034  | 9203.84 | 8797.77 | 8737.18 | 6725.18 | 7058.47 | 5717.71 | Down |
| Akap13   | 12158.8 | 0.36982 | 0.12512 | 2.95578 | 0.00312  | 0.01456  | 11749.3 | 9986.97 | 10090.2 | 12630.3 | 15472.9 | 13023   | Up   |
| AU02020f | 11774.6 | 0.32429 | 0.15163 | 2.13876 | 0.03246  | 0.09724  | 12100.5 | 10312.8 | 8956.8  | 13171.5 | 14734.7 | 11371.1 | Up   |
| Khlh25   | 1441.23 | -0.3357 | 0.14606 | -2.2984 | 0.02154  | 0.07065  | 1432.87 | 1528.42 | 1862.98 | 1327    | 1356.99 | 1139.12 | Down |
| Ntrk3    | 168.106 | -1.1461 | 0.32967 | -3.4765 | 0.00051  | 0.00314  | 163.508 | 352.639 | 178.563 | 101.598 | 108.771 | 103.556 | Down |
| Aen      | 1460.23 | 0.39094 | 0.18187 | 2.14952 | 0.03159  | 0.09538  | 1321.61 | 1076.12 | 1393.17 | 1349.8  | 1598.82 | 2021.86 | Up   |
| Abhd2    | 12055.3 | 0.58117 | 0.10944 | 5.31051 | 1.09E-07 | 1.61E-06 | 10229.4 | 8626.24 | 10122.7 | 13764.5 | 15414.8 | 14174.1 | Up   |
| Fanci    | 35.6236 | 1.03494 | 0.42171 | 2.45418 | 0.01412  | 0.05064  | 25.155  | 16.2904 | 28.6465 | 57.0194 | 45.4091 | 41.2214 | Up   |
| Ticrr    | 23.7139 | 1.10522 | 0.49596 | 2.22845 | 0.02585  | 0.08177  | 15.48   | 19.1652 | 10.5037 | 38.3585 | 30.6247 | 28.1512 | Up   |
| Plin1    | 532.01  | -6.3107 | 1.18271 | -5.3358 | 9.51E-08 | 1.41E-06 | 522.451 | 2200.16 | 429.697 | 17.6242 | 21.1205 | 1.0054  | Down |
| Wdr93    | 751.725 | -1.2042 | 0.2459  | -4.897  | 9.73E-07 | 1.20E-05 | 861.076 | 1185.37 | 1099.07 | 464.449 | 305.191 | 595.197 | Down |
| Anpep    | 5520.69 | 0.66186 | 0.12767 | 5.18417 | 2.17E-07 | 3.04E-06 | 4589.83 | 4314.08 | 3924.57 | 6074.12 | 6525.18 | 7696.34 | Up   |
| Zfp710   | 2109.22 | 0.51146 | 0.12188 | 4.19637 | 2.71E-05 | 0.00024  | 1821.81 | 1671.2  | 1724.52 | 2242.42 | 2799.52 | 2395.87 | Up   |
| Idh2     | 9132.92 | -0.3266 | 0.13179 | -2.4782 | 0.0132   | 0.04794  | 10414.2 | 11191.5 | 8881.37 | 8870.14 | 7222.16 | 8218.15 | Down |
| Cib1     | 3924.52 | 0.90713 | 0.09676 | 9.37487 | 6.93E-21 | 6.47E-19 | 2795.11 | 2779.91 | 2614.47 | 5500.81 | 4820.76 | 5036.05 | Up   |
| Gdpgp1   | 392.296 | 0.53391 | 0.19066 | 2.80024 | 0.00511  | 0.0221   | 360.878 | 280.77  | 319.886 | 388.768 | 547.021 | 456.452 | Up   |
| Ttl13    | 175.252 | -1.1724 | 0.23322 | -5.0271 | 4.98E-07 | 6.55E-06 | 218.655 | 261.605 | 248.27  | 108.855 | 83.426  | 130.702 | Down |
| Ngrn     | 1959.95 | -0.2767 | 0.13629 | -2.0304 | 0.04231  | 0.11976  | 2021.11 | 2360.19 | 2060.64 | 2034.04 | 1679.08 | 1604.62 | Down |
| Man2a2   | 2367.14 | 1.22953 | 0.1488  | 8.2632  | 1.42E-16 | 8.82E-15 | 1675.71 | 1331.02 | 1239.44 | 3050.02 | 3640.12 | 3266.55 | Up   |
| Fes      | 2785.2  | 0.72774 | 0.13182 | 5.52053 | 3.38E-08 | 5.53E-07 | 1983.38 | 2090.92 | 2217.24 | 3363.11 | 3998.11 | 3058.43 | Up   |
| Furin    | 5716.21 | 0.75466 | 0.13913 | 5.42406 | 5.83E-08 | 9.09E-07 | 4337.31 | 4241.25 | 4184.3  | 6950.14 | 8492.56 | 6091.72 | Up   |
| Iqgap1   | 31119.6 | 0.90271 | 0.12882 | 7.0073  | 2.43E-12 | 8.21E-11 | 24664.5 | 19674   | 20729.6 | 38505.7 | 45093.3 | 38050.4 | Up   |
| Gm44899  | 148.886 | -0.5367 | 0.25953 | -2.0679 | 0.03865  | 0.1115   | 170.28  | 147.572 | 211.029 | 99.5247 | 115.107 | 149.805 | Down |
| Alpk3    | 190.802 | -2.3742 | 0.46144 | -5.1452 | 2.67E-07 | 3.71E-06 | 220.59  | 571.122 | 168.059 | 42.5053 | 58.0814 | 84.4537 | Down |
| Pde8a    | 2375.85 | -0.2567 | 0.11863 | -2.1635 | 0.0305   | 0.0929   | 2431.33 | 2457.93 | 2870.38 | 2144.97 | 2330.65 | 2019.85 | Down |
| 2900076A | 519.046 | -0.6863 | 0.21011 | -3.2663 | 0.00109  | 0.00599  | 549.541 | 808.77  | 562.426 | 335.896 | 339.178 | 458.463 | Down |
| Gm37829  | 71.5431 | -3.0801 | 0.55835 | -5.5164 | 3.46E-08 | 5.64E-07 | 86.1076 | 227.107 | 70.6613 | 22.8077 | 9.50423 | 13.0702 | Down |
| Fsd2     | 449.688 | -2.769  | 0.42989 | -6.4411 | 1.19E-10 | 3.11E-09 | 435.376 | 1406.72 | 510.862 | 157.581 | 74.9778 | 112.605 | Down |
| Homer2   | 238.575 | -1.1172 | 0.224   | -4.9874 | 6.12E-07 | 7.95E-06 | 292.185 | 348.806 | 338.983 | 153.434 | 114.051 | 183.988 | Down |
| Btbdl1   | 1203.83 | 0.25012 | 0.10797 | 2.31664 | 0.02052  | 0.06809  | 1080.7  | 1188.24 | 1030.32 | 1278.27 | 1305.25 | 1340.2  | Up   |
| Tm6sf1   | 764.483 | 0.67447 | 0.17744 | 3.80118 | 0.00014  | 0.00105  | 691.764 | 534.708 | 540.464 | 777.537 | 1058.14 | 984.287 | Up   |
| Hdgfl3   | 634.837 | -0.3245 | 0.12981 | -2.4996 | 0.01243  | 0.04567  | 762.391 | 659.282 | 696.11  | 606.479 | 543.853 | 540.906 | Down |
| Adamtsl3 | 761.864 | -0.3216 | 0.14645 | -2.1959 | 0.0281   | 0.08744  | 808.831 | 930.469 | 800.192 | 631.36  | 625.167 | 775.164 | Down |
| Stard5   | 1958.52 | 1.21117 | 0.14485 | 8.36159 | 6.19E-17 | 4.06E-15 | 1370.95 | 1179.62 | 994.033 | 2693.39 | 2926.25 | 2586.9  | Up   |
| Cfap161  | 1383.35 | -1.2266 | 0.22795 | -5.3809 | 7.41E-08 | 1.13E-06 | 1691.19 | 2187.7  | 1936.5  | 904.016 | 549.133 | 1031.54 | Down |
| Mesd     | 3234.79 | -0.2801 | 0.11508 | -2.4339 | 0.01494  | 0.05288  | 3263.38 | 3651.92 | 3727.86 | 3084.23 | 3058.25 | 2623.09 | Down |
| Abhd17c  | 6031.46 | 0.70413 | 0.11107 | 6.33948 | 2.31E-10 | 5.75E-09 | 4723.34 | 4599.64 | 4441.16 | 7531.74 | 8239.11 | 6653.74 | Up   |
| Arnt2    | 228.309 | 2.50989 | 0.46594 | 5.38674 | 7.17E-08 | 1.10E-06 | 59.9851 | 117.866 | 26.7367 | 234.298 | 502.668 | 428.301 | Up   |
| Gm2115   | 515.903 | 1.88394 | 0.24317 | 7.74755 | 9.37E-15 | 4.58E-13 | 246.713 | 206.984 | 206.255 | 547.386 | 858.549 | 1029.53 | Up   |
| Folh1    | 56.8953 | -1.1338 | 0.50357 | -2.2514 | 0.02436  | 0.07797  | 80.3026 | 114.991 | 39.1502 | 44.5788 | 42.241  | 20.108  | Down |
| Nox4     | 4617.11 | -0.6004 | 0.13739 | -4.37   | 1.24E-05 | 0.00012  | 6475.49 | 5434.28 | 4783.01 | 3421.16 | 3836.54 | 3752.16 | Down |
| Grm5     | 21.4058 | -2.0666 | 0.595   | -3.4733 | 0.00051  | 0.00317  | 35.7976 | 28.7478 | 39.1502 | 13.4773 | 4.2241  | 7.03781 | Down |
| Ctsc     | 24205.5 | 1.49844 | 0.20686 | 7.24379 | 4.36E-13 | 1.67E-11 | 17030.9 | 9220.36 | 11714.5 | 32852.5 | 37121.4 | 37293.3 | Up   |
| Gm44751  | 755.374 | 1.35038 | 0.26263 | 5.14171 | 2.72E-07 | 3.77E-06 | 373.456 | 534.708 | 368.585 | 1527.08 | 841.652 | 886.764 | Up   |
| Rab38    | 621.738 | 0.4628  | 0.18896 | 2.44922 | 0.01432  | 0.05115  | 667.576 | 438.882 | 462.163 | 720.518 | 745.554 | 695.737 | Up   |
| Tmem135  | 3150.67 | 0.59182 | 0.10944 | 5.40782 | 6.38E-08 | 9.85E-07 | 2352.96 | 2735.83 | 2451.18 | 3527.94 | 4026.62 | 3809.46 | Up   |
| Fzd4     | 7294.17 | -0.4003 | 0.08635 | -4.6355 | 3.56E-06 | 3.90E-05 | 7775.81 | 8366.56 | 8756.28 | 6325    | 6270.68 | 6270.69 | Down |
| Prss23   | 2930.43 | -0.8969 | 0.21827 | -4.1094 | 3.97E-05 | 0.00033  | 3810.02 | 4231.67 | 3397.47 | 2558.61 | 2213.43 | 1371.37 | Down |
| Me3      | 397.795 | -1.9205 | 0.38275 | -5.0177 | 5.23E-07 | 6.86E-06 | 470.206 | 1019.59 | 398.186 | 238.445 | 145.732 | 114.616 | Down |
| Ccdc81   | 911.046 | -1.1731 | 0.20135 | -5.8264 | 5.66E-09 |          |         |         |         |         |         |         |      |

|          |         |         |         |         |          |          |         |         |         |         |         |         |      |
|----------|---------|---------|---------|---------|----------|----------|---------|---------|---------|---------|---------|---------|------|
| Prpc     | 2956.7  | 0.57124 | 0.12065 | 4.73467 | 2.19E-06 | 2.51E-05 | 2596.77 | 2224.12 | 2315.59 | 3769.5  | 3680.25 | 3153.94 | Up   |
| Gm15501  | 171.372 | -0.7613 | 0.22586 | -3.3709 | 0.00075  | 0.00437  | 249.615 | 212.733 | 184.292 | 143.067 | 130.947 | 107.578 | Down |
| Gab2     | 2629.19 | 0.40344 | 0.13705 | 2.94383 | 0.00324  | 0.01503  | 2066.58 | 2524.05 | 2201.01 | 2802.24 | 3419.41 | 2761.84 | Up   |
| Usp35    | 630.478 | 0.5908  | 0.15768 | 3.74673 | 0.00018  | 0.00127  | 587.273 | 479.129 | 443.066 | 722.591 | 827.924 | 722.883 | Up   |
| Alg8     | 792.499 | 0.41961 | 0.11188 | 3.75068 | 0.00018  | 0.00125  | 630.811 | 711.986 | 691.335 | 910.237 | 899.734 | 910.893 | Up   |
| Thrsp    | 1197.59 | -1.8125 | 0.63405 | -2.8586 | 0.00426  | 0.01892  | 1154.23 | 3439.19 | 999.762 | 752.656 | 381.225 | 458.463 | Down |
| Kctd14   | 446.037 | 0.61821 | 0.16598 | 3.72456 | 0.0002   | 0.00137  | 405.383 | 316.225 | 334.209 | 483.11  | 549.133 | 588.16  | Up   |
| Aamdc    | 943.249 | -0.364  | 0.13424 | -2.7111 | 0.00671  | 0.02752  | 1212.28 | 1020.55 | 952.018 | 801.381 | 844.82  | 828.45  | Down |
| Pak1     | 2288.44 | 1.09572 | 0.10217 | 10.7243 | 7.83E-27 | 1.26E-24 | 1468.67 | 1430.68 | 1477.2  | 3156.8  | 3334.93 | 2862.38 | Up   |
| Myo7a    | 1461.46 | 0.97801 | 0.2435  | 4.01641 | 5.91E-05 | 0.00048  | 1311.93 | 890.222 | 750.538 | 1546.78 | 2481.66 | 1787.6  | Up   |
| Capn5    | 1844.41 | 0.33126 | 0.1669  | 1.98475 | 0.04717  | 0.13041  | 1398.04 | 1622.33 | 1880.16 | 1995.68 | 2408.79 | 1761.46 | Up   |
| B3gnt6   | 55.0679 | -0.9145 | 0.34872 | -2.6224 | 0.00873  | 0.03415  | 60.9526 | 67.0781 | 87.8492 | 46.6522 | 31.6808 | 36.1944 | Down |
| Tsku     | 1717.39 | -1.3376 | 0.30534 | -4.3806 | 1.18E-05 | 0.00011  | 3921.28 | 1735.41 | 1726.43 | 995.247 | 767.73  | 1158.22 | Down |
| Gm44507  | 8.4658  | -2.1478 | 0.98967 | -2.1702 | 0.02999  | 0.09177  | 25.155  | 8.62433 | 7.63906 | 4.14686 | 4.2241  | 1.0054  | Down |
| Gm15506  | 174.458 | -0.6372 | 0.24609 | -2.5892 | 0.00962  | 0.03698  | 161.573 | 236.69  | 238.721 | 136.846 | 156.292 | 116.627 | Down |
| Wnt11    | 1677.42 | -0.8146 | 0.18637 | -4.3706 | 1.24E-05 | 0.00012  | 2225.25 | 2259.57 | 1931.73 | 1392.31 | 892.341 | 1363.32 | Down |
| Uvrsg    | 3154.88 | 0.30406 | 0.10517 | 2.89127 | 0.00384  | 0.01735  | 3113.42 | 2623.71 | 2733.83 | 3425.31 | 3591.54 | 3441.49 | Up   |
| Dgat2    | 1635.01 | -1.4977 | 0.52283 | -2.8646 | 0.00418  | 0.01864  | 2223.32 | 3928.86 | 1092.39 | 662.461 | 1023.29 | 879.726 | Down |
| Map6     | 2392.72 | 0.49419 | 0.16378 | 3.01743 | 0.00255  | 0.01225  | 1914.69 | 1866.69 | 2179.04 | 2602.16 | 3432.08 | 2361.69 | Up   |
| Gdpd5    | 1337.84 | 0.35466 | 0.15676 | 2.26243 | 0.02367  | 0.07625  | 959.761 | 1308.02 | 1254.72 | 1516.72 | 1631.56 | 1356.29 | Up   |
| Gm10605  | 81.5491 | -0.7954 | 0.29478 | -2.6983 | 0.00697  | 0.02842  | 127.71  | 85.285  | 97.3981 | 62.203  | 64.4175 | 52.2808 | Down |
| Xrra1    | 181.618 | -0.8321 | 0.21321 | -3.9029 | 9.50E-05 | 0.00073  | 204.143 | 270.229 | 223.443 | 143.067 | 115.107 | 133.718 | Down |
| Chrdl2   | 34.2556 | -1.4945 | 0.4568  | -3.2716 | 0.00107  | 0.0059   | 40.6351 | 67.0781 | 43.9246 | 16.5875 | 23.2326 | 14.0756 | Down |
| Pold3    | 2188.03 | 0.23718 | 0.0942  | 2.51779 | 0.01181  | 0.04379  | 2000.79 | 1953.89 | 2071.14 | 2241.38 | 2366.55 | 2494.4  | Up   |
| Pgm211   | 2150.32 | 0.44849 | 0.19393 | 2.3126  | 0.02074  | 0.0686   | 1833.42 | 1965.39 | 1657.68 | 2496.41 | 1834.32 | 3114.73 | Up   |
| P4ha3    | 122.991 | 1.23615 | 0.26151 | 4.72697 | 2.28E-06 | 2.59E-05 | 74.4976 | 66.1198 | 79.2553 | 212.527 | 165.796 | 139.751 | Up   |
| Ucp3     | 401.601 | 1.52233 | 0.33771 | 4.50777 | 6.55E-06 | 6.75E-05 | 276.705 | 226.149 | 119.36  | 554.643 | 820.532 | 412.214 | Up   |
| Ucp2     | 45321   | 0.38468 | 0.16444 | 2.3394  | 0.01931  | 0.06498  | 42721   | 39788.8 | 35432.8 | 56716.7 | 57652.6 | 39613.8 | Up   |
| Dnajb13  | 1622.88 | -0.3365 | 0.14578 | -2.3083 | 0.02098  | 0.06925  | 1756.98 | 1861.9  | 1815.23 | 1579.95 | 1165.85 | 1557.37 | Down |
| Arhgef17 | 4453.31 | -0.2717 | 0.11288 | -2.4069 | 0.01609  | 0.05616  | 5231.28 | 4353.37 | 5029.37 | 4146.86 | 4198.76 | 3760.2  | Down |
| P2ry6    | 941.371 | 0.73513 | 0.14167 | 5.18915 | 2.11E-07 | 2.97E-06 | 745.944 | 700.487 | 673.192 | 138.131 | 1351.71 | 1038.58 | Up   |
| P2ry2    | 1385.27 | 1.39593 | 0.15278 | 9.13684 | 6.43E-20 | 5.53E-18 | 911.386 | 658.324 | 719.027 | 1935.55 | 2168.02 | 1919.31 | Up   |
| Fchs2    | 481.252 | 0.75989 | 0.19418 | 3.91332 | 9.10E-05 | 0.0007   | 412.156 | 320.058 | 339.938 | 478.963 | 654.736 | 681.662 | Up   |
| Folr2    | 133.022 | -0.6587 | 0.8253  | -2.3315 | 0.01973  | 0.0661   | 145.125 | 201.234 | 142.278 | 131.663 | 81.314  | 96.5185 | Down |
| Folr1    | 21.267  | 1.9639  | 0.82078 | 2.39273 | 0.01672  | 0.05798  | 19.35   | 4.79129 | 1.90977 | 49.7624 | 31.6808 | 20.108  | Up   |
| Lamtor1  | 2802.53 | 0.37147 | 0.13165 | 2.82155 | 0.00478  | 0.02088  | 2469.06 | 2594.01 | 2267.85 | 3263.58 | 3508.12 | 2712.57 | Up   |
| Lrrc51   | 64.3341 | -0.8721 | 0.42337 | -2.06   | 0.0394   | 0.11318  | 94.8151 | 66.1198 | 88.8041 | 29.028  | 34.8488 | 72.3889 | Down |
| Il18bp   | 759.863 | 1.05724 | 0.1151  | 9.18513 | 4.11E-20 | 3.65E-18 | 506.971 | 491.587 | 481.261 | 1094.77 | 984.216 | 1000.37 | Up   |
| Art5     | 35.9041 | -3.4115 | 0.69252 | -4.9262 | 8.38E-07 | 1.05E-05 | 64.8226 | 103.492 | 28.6465 | 2.07343 | 6.33615 | 10.054  | Down |
| Art1     | 78.7384 | -6.5289 | 1.69274 | -3.857  | 0.00011  | 0.00086  | 93.8476 | 326.766 | 46.7893 | 0       | 0       | 5.027   | Down |
| Chrna10  | 9.7202  | -2.2145 | 0.84125 | -2.6323 | 0.00848  | 0.03335  | 10.6425 | 24.9147 | 12.4135 | 3.11015 | 4.2241  | 3.0162  | Down |
| Pgap2    | 2235.88 | 0.27382 | 0.11658 | 2.34869 | 0.01884  | 0.06375  | 2258.15 | 1936.64 | 1878.25 | 2307.73 | 2568.25 | 2466.25 | Up   |
| Stim1    | 4514.51 | -0.2584 | 0.08232 | -3.139  | 0.0017   | 0.00867  | 4845.25 | 5155.43 | 4752.45 | 4176.93 | 4073.09 | 4083.94 | Down |
| Rrm1     | 2018.9  | 0.27801 | 0.13984 | 1.98814 | 0.0468   | 0.12953  | 2143.02 | 1738.28 | 1593.7  | 2337.79 | 2150.07 | 2150.55 | Up   |
| Trim68   | 1746.8  | -0.2364 | 0.11725 | -2.0162 | 0.04377  | 0.12302  | 1897.27 | 1879.15 | 1892.58 | 1728.21 | 1405.57 | 1678.01 | Down |
| Olfir78  | 19.2053 | -1.5107 | 0.68058 | -2.2198 | 0.02644  | 0.08327  | 14.5125 | 33.5391 | 37.2404 | 4.14686 | 13.7283 | 12.0648 | Down |
| Trim6    | 253.601 | 1.48553 | 0.20078 | 7.39874 | 1.37E-13 | 5.74E-12 | 122.873 | 153.321 | 124.135 | 408.466 | 398.122 | 314.69  | Up   |
| Trim30a  | 2164.83 | 0.4711  | 0.12794 | 3.68236 | 0.00023  | 0.00157  | 2067.55 | 1778.53 | 1597.52 | 2434.21 | 2468.99 | 2642.19 | Up   |
| Smpd1    | 6137.55 | 0.24019 | 0.08666 | 2.77156 | 0.00558  | 0.02376  | 5852.42 | 5784.05 | 5247.08 | 6636.02 | 6632.9  | 6672.85 | Up   |
| Trim3    | 7423.75 | -0.5312 | 0.18672 | -2.8448 | 0.00444  | 0.01962  | 6291.66 | 9585.46 | 10448.3 | 6163.28 | 6397.4  | 5656.39 | Down |
| Tpp1     | 11111.5 | 0.50639 | 0.09659 | 5.24274 | 1.58E-07 | 2.27E-06 | 9771.76 | 8781.48 | 8990.22 | 12607.5 | 14001.8 | 12516.2 | Up   |
| Syt9     | 78.4959 | -1.2003 | 0.34656 | -3.4634 | 0.00053  | 0.00327  | 97.7176 | 125.532 | 105.037 | 35.2483 | 39.0729 | 68.3673 | Down |
| Olfml1   | 754.716 | -0.5188 | 0.11624 | -4.4636 | 8.06E-06 | 8.10E-05 | 835.921 | 946.76  | 884.222 | 643.801 | 609.327 | 608.268 | Down |
| Cyb5r2   | 39.062  | -1.2515 | 0.54939 | -2.278  | 0.02272  | 0.0738   | 34.8301 | 92.9511 | 37.2404 | 15.5507 | 31.6808 | 22.1188 | Down |
| Gm10156  | 224.426 | 0.58896 | 0.21282 | 2.76744 | 0.00565  | 0.02401  | 174.15  | 213.692 | 149.917 | 303.758 | 237.606 | 267.437 | Up   |
| Olfir510 | 6.97766 | 4.38165 | 1.36004 | 3.22171 | 0.00127  | 0.00685  | 0       | 0.95826 | 0.95488 | 14.514  | 6.33615 | 19.1026 | Up   |
| Stk33    | 2146.8  | -0.8803 | 0.25875 | -3.4022 | 0.00067  | 0.00397  | 2407.14 | 3064.51 | 2875.15 | 1673.26 | 888.117 | 1972.6  | Down |
| 1700095J | 146.808 | -0.9375 | 0.38988 | -2.4046 | 0.01619  | 0.05646  | 178.988 | 201.234 | 198.616 | 108.855 | 44.3531 | 148.799 | Down |
| Trim66   | 49.3392 | -1.5229 | 0.40976 | -3.7167 | 0.0002   | 0.00141  | 46.4401 | 91.0346 | 82.1199 | 29.028  | 24.2886 | 23.1242 | Down |
| Rpl27a   | 18884.1 | -0.2596 | 0.13036 | -1.9914 | 0.04644  | 0.12877  | 20492.6 | 18066.1 | 23176.9 | 18212   | 17973.6 | 15383.6 | Down |
| Tmem9b   | 5369.64 | 0.23725 | 0.097   | 2.4458  | 0.01445  | 0.05152  | 4708.83 | 4982.94 | 5095.26 | 5819.09 | 6214.71 | 5396.99 | Up   |
| Scube2   | 1229.36 | -1.0292 | 0.12723 | -8.0892 | 6.01E-16 | 3.48E-14 | 1611.86 | 1505.42 | 1833.38 | 823.152 | 749.778 | 852.58  | Down |
| Tmem41b  | 3279.41 | 0.57615 | 0.09874 | 5.83505 | 5.38E-09 | 1.03E-07 | 2471.97 | 2652.46 | 2774.89 | 3724.92 | 4152.29 | 3899.95 | Up   |
| Swap70   | 4430.55 | -0.3883 | 0.09217 | -4.2132 | 2.52E-05 | 0.00022  | 5300.94 | 4755.84 | 5013.14 | 3653.39 | 3916.8  | 3943.18 | Down |
| Gm28863  | 29.7809 | 2.38047 | 0.64698 | 3.67933 | 0.00023  | 0.00159  | 10.6425 | 2.87478 | 15.2781 | 59.0928 | 27.4567 | 63.3403 | Up   |
| Lyve1    | 9666.32 | -1.4406 | 0.15625 | -9.2204 | 2.96E-20 | 2.65E-18 | 14532.8 | 11819.2 | 16031.5 | 6039.91 | 4929.53 | 4644.95 | Down |
| Mrv1     | 443.301 | -0.9418 | 0.28978 | -3.2502 | 0.00115  | 0.00629  | 408.286 | 864.349 | 476.487 | 295.464 | 354.825 | 260.399 | Down |
| 1700012D | 151.302 | -0.6581 | 0.29084 | -2.2629 | 0.02364  | 0.07618  | 174.15  | 143.739 | 237.766 | 87.0841 | 139.395 | 125.675 | Down |
| Galnt18  | 7453.14 | -0.5077 | 0.11685 | -4.345  | 1.39E-05 | 0.00013  | 7695.51 | 9147.54 | 9410.37 | 6431.79 | 6312.92 | 5720.73 | Down |
| Dkk3     | 5176.21 | -0.719  | 0.22168 | -3.2432 | 0.00118  | 0.00641  | 4709.8  | 9010.51 | 5599.43 | 3959.22 | 4100.55 | 3677.76 | Down |
| 2310014F | 392.428 | -0.7294 | 0.14794 | -4.9303 | 8.21E-07 | 1.04E-05 | 469.238 | 491.587 | 507.998 | 316.198 | 261.894 | 307.653 | Down |
| Tead1    | 7852.33 | -0.2622 | 0.08482 | -3.0911 | 0.00199  | 0.00995  | 8186.03 | 8566.83 | 8938.66 | 6969.84 | 7444.98 | 7007.64 | Down |
| Rassf10  | 355.576 | -0.8063 | 0.33258 | -2.4244 | 0.01533  | 0.05401  | 417.961 | 503.086 | 436.381 | 331.749 | 123.555 | 320.723 | Down |
| Arnt1    | 1019.52 | -1.2253 | 0.62376 | -1.9643 | 0.04949  | 0.13574  | 431.506 | 1916.52 | 1936.5  | 603.369 | 620.943 | 608.268 | Down |
| Spon1    | 11603.8 | -0.394  | 0.08413 | -4.6832 | 2.82E-06 | 3.16E-05 | 13401.8 | 13144.4 | 12989.3 | 10459.4 | 10227.6 | 9400.5  | Down |
| Rras2    | 4655.05 | -0.6392 | 0.14748 | -4.3346 | 1.46E-05 | 0.00014  | 4672.06 | 5970.91 | 6366.2  | 3579.78 | 4003.39 | 3337.93 | Down |
| Copb1    | 8746.18 | 0.21711 | 0.07524 | 2.88543 | 0.00391  | 0.01762  | 8012.85 |         |         |         |         |         |      |

|           |         |         |         |         |          |          |         |         |         |         |         |         |      |
|-----------|---------|---------|---------|---------|----------|----------|---------|---------|---------|---------|---------|---------|------|
| Gm45151   | 70.3455 | 0.58189 | 0.27547 | 2.11236 | 0.03466  | 0.10247  | 61.9201 | 49.8294 | 57.293  | 82.9373 | 87.6501 | 82.4429 | Up   |
| Xylt1     | 248.528 | 0.38632 | 0.17212 | 2.24454 | 0.0248   | 0.07914  | 217.688 | 216.566 | 211.984 | 275.766 | 316.808 | 252.356 | Up   |
| Arl6ip1   | 12452.9 | 0.59282 | 0.15242 | 3.88934 | 0.0001   | 0.00076  | 10012.7 | 8646.37 | 11130.1 | 16037   | 16504.6 | 12386.5 | Up   |
| Syt17     | 492.122 | -0.7043 | 0.27646 | -2.5475 | 0.01085  | 0.04092  | 667.576 | 630.534 | 531.87  | 314.125 | 257.67  | 550.96  | Down |
| Gm44652   | 32.9052 | -1.1229 | 0.49996 | -2.2459 | 0.02471  | 0.07891  | 32.895  | 53.6625 | 48.699  | 31.1015 | 19.0085 | 12.0648 | Down |
| Tmc5      | 1807.57 | 1.64872 | 0.53968 | 3.05498 | 0.00225  | 0.011    | 836.889 | 1352.1  | 433.517 | 2957.75 | 1612.55 | 3652.62 | Up   |
| Gde1      | 15810   | 0.81176 | 0.11303 | 7.18201 | 6.87E-13 | 2.53E-11 | 12535.9 | 11448.3 | 10443.6 | 19388.7 | 19089.8 | 21953.9 | Up   |
| Vps35l    | 3879.99 | 0.30622 | 0.09367 | 3.26921 | 0.00108  | 0.00594  | 3707.47 | 3358.7  | 3343.04 | 4403.97 | 4368.78 | 4098.01 | Up   |
| lqck      | 913.389 | -0.4466 | 0.18933 | -2.3589 | 0.01833  | 0.06238  | 1060.38 | 1088.58 | 1012.18 | 893.649 | 563.918 | 861.629 | Down |
| Gp2       | 7089.32 | 4.48075 | 1.24712 | 3.59287 | 0.00033  | 0.00214  | 222.525 | 1502.55 | 98.3529 | 10751.8 | 4692.98 | 25267.7 | Up   |
| Umod      | 18.2594 | 3.54431 | 0.89839 | 3.94519 | 7.97E-05 | 0.00062  | 4.83751 | 2.87478 | 0.95488 | 19.6976 | 15.8404 | 65.3511 | Up   |
| Acsn5     | 57.9339 | -1.5576 | 0.5516  | -2.8239 | 0.00474  | 0.02077  | 101.588 | 114.991 | 42.9697 | 34.2116 | 11.6163 | 42.2268 | Down |
| Acsn1     | 602.084 | -0.5073 | 0.25581 | -1.983  | 0.04736  | 0.13083  | 648.226 | 843.268 | 629.268 | 551.533 | 317.864 | 622.343 | Down |
| Thumpd1   | 1845.29 | -0.2217 | 0.08687 | -2.5527 | 0.01069  | 0.04042  | 1960.16 | 1957.72 | 2042.49 | 1696.07 | 1740.33 | 1675    | Down |
| Ppp1ccb   | 634.677 | 0.36422 | 0.15369 | 2.36985 | 0.0178   | 0.06088  | 642.421 | 541.416 | 481.261 | 713.261 | 671.632 | 758.072 | Up   |
| Acsn3     | 9.46833 | 1.69152 | 0.8435  | 2.00536 | 0.04492  | 0.12549  | 1.935   | 8.62433 | 2.86465 | 16.5875 | 13.7283 | 13.0702 | Up   |
| Anks4b    | 10.4362 | 4.37554 | 1.15755 | 3.78001 | 0.00016  | 0.00113  | 0       | 2.87478 | 0       | 23.8445 | 14.7844 | 21.1134 | Up   |
| Abca15    | 10.5739 | -5.8134 | 1.36395 | -4.2622 | 2.02E-05 | 0.00018  | 20.3175 | 21.0817 | 21.0074 | 1.03672 | 0       | 0       | Down |
| Mosmo     | 2581.68 | -0.407  | 0.08119 | -5.0133 | 5.35E-07 | 7.00E-06 | 2922.82 | 2916.94 | 2990.69 | 2268.33 | 2175.41 | 2215.9  | Down |
| Eef2k     | 1668.33 | -0.3362 | 0.1353  | -2.485  | 0.01296  | 0.04722  | 2129.47 | 1790.99 | 1665.32 | 1475.25 | 1365.44 | 1583.51 | Down |
| Cdr2      | 1670.49 | -0.7918 | 0.16234 | -4.8777 | 1.07E-06 | 1.32E-05 | 2040.46 | 1834.11 | 2478.88 | 1111.36 | 1140.51 | 1417.62 | Down |
| Usp31     | 1702.56 | -0.2737 | 0.1079  | -2.5364 | 0.0112   | 0.04193  | 1789.88 | 1770.86 | 2030.08 | 1539.52 | 1477.38 | 1607.64 | Down |
| Ndufab1   | 2101.75 | -0.2513 | 0.14465 | -3.1203 | 0.00181  | 0.00915  | 2066.58 | 2842.2  | 2374.79 | 1882.68 | 1672.74 | 1771.52 | Down |
| Tnrc6a    | 3930.77 | -0.2415 | 0.10051 | -2.4027 | 0.01627  | 0.0567   | 4078.99 | 4112.85 | 4585.35 | 3570.45 | 3420.47 | 3816.5  | Down |
| Arhgap17  | 3344.98 | 0.41108 | 0.10785 | 3.81178 | 0.00014  | 0.00101  | 2962.49 | 2769.37 | 2882.79 | 3653.39 | 4234.66 | 3567.16 | Up   |
| 3100003L  | 6.25574 | 2.46803 | 1.14565 | 2.15427 | 0.03122  | 0.09448  | 0       | 3.83303 | 1.90977 | 7.25701 | 8.4482  | 16.0864 | Up   |
| Gm30717   | 6.93857 | 3.29232 | 1.41426 | 2.32794 | 0.01992  | 0.0666   | 3.87001 | 0       | 0       | 5.18358 | 8.4482  | 24.1296 | Up   |
| Il4ra     | 6666    | 0.32212 | 0.13621 | 2.36481 | 0.01804  | 0.06159  | 5121.95 | 6058.11 | 6594.42 | 6868.24 | 8301.42 | 7051.88 | Up   |
| Gtf3c1    | 4766.23 | 0.50881 | 0.09367 | 5.43187 | 5.58E-08 | 8.78E-07 | 4079.95 | 3752.54 | 3970.4  | 5756.88 | 5815.53 | 5222.05 | Up   |
| Gsg1l     | 110.742 | -1.593  | 0.36576 | -4.3552 | 1.33E-05 | 0.00013  | 234.135 | 102.534 | 162.33  | 44.5788 | 67.5856 | 53.2862 | Down |
| Sbk1      | 786.356 | -0.3641 | 0.16397 | -2.2203 | 0.0264   | 0.08317  | 856.239 | 1056.96 | 741.944 | 731.921 | 669.52  | 761.554 | Down |
| Lat       | 525.707 | -0.7498 | 0.14631 | -5.1246 | 2.98E-07 | 4.11E-06 | 581.468 | 679.405 | 717.117 | 414.686 | 366.441 | 395.123 | Down |
| Tufm      | 2559.91 | -0.2051 | 0.10192 | -2.012  | 0.04422  | 0.1239   | 2620.96 | 2875.73 | 2728.1  | 2490.19 | 2192.31 | 2452.17 | Down |
| Eif3c     | 1141.72 | 0.24751 | 0.07826 | 3.16281 | 0.00156  | 0.0081   | 10751.8 | 9975.47 | 10581.1 | 12550.5 | 12102.1 | 12515.2 | Up   |
| Apobr     | 752.153 | 1.19293 | 0.20362 | 5.85857 | 4.67E-09 | 9.15E-08 | 547.606 | 452.298 | 373.359 | 1010.8  | 1267.23 | 861.629 | Up   |
| Il27      | 49.639  | 0.82385 | 0.34549 | 2.38461 | 0.0171   | 0.05899  | 29.9925 | 38.3303 | 39.1502 | 57.0194 | 76.0338 | 57.3078 | Up   |
| Nupr1     | 9311.25 | 0.5501  | 0.15483 | 3.55303 | 0.00038  | 0.00245  | 6352.61 | 8706.74 | 7612.33 | 12766.1 | 10087.2 | 10342.6 | Up   |
| 2510046G  | 53.1342 | -0.7469 | 0.33045 | -2.2601 | 0.02381  | 0.07663  | 63.8551 | 67.0781 | 68.7516 | 40.4319 | 47.5211 | 31.1674 | Down |
| Gm6939    | 81.5636 | -1.3738 | 0.29588 | -4.6431 | 3.43E-06 | 3.77E-05 | 102.555 | 106.367 | 144.187 | 50.7991 | 42.241  | 43.2322 | Down |
| Ypel3     | 5117.85 | -0.4344 | 0.13023 | -3.336  | 0.00085  | 0.00485  | 6240.38 | 5759.13 | 5648.13 | 4737.79 | 4654.96 | 3666.7  | Down |
| Tbx6      | 230.952 | -0.5853 | 0.17028 | -3.4373 | 0.00059  | 0.00355  | 285.413 | 250.106 | 296.014 | 184.535 | 181.636 | 188.01  | Down |
| Fam57b    | 407.787 | -0.5737 | 0.28584 | -2.0069 | 0.04476  | 0.12512  | 635.648 | 478.171 | 349.487 | 335.896 | 420.298 | 227.221 | Down |
| Hirip3    | 911.94  | -0.3077 | 0.14267 | -2.1568 | 0.03102  | 0.09408  | 1125.2  | 856.683 | 1044.64 | 854.254 | 782.515 | 808.342 | Down |
| Sez6l2    | 97.7459 | -0.7382 | 0.24589 | -3.0022 | 0.00268  | 0.01277  | 116.1   | 111.158 | 139.413 | 71.5334 | 72.8658 | 75.4051 | Down |
| Cdiptos   | 627.892 | -0.5207 | 0.24288 | -2.1437 | 0.03206  | 0.09642  | 477.946 | 890.222 | 851.756 | 571.23  | 460.427 | 515.771 | Down |
| Mvp       | 7317.85 | 0.48581 | 0.09092 | 5.34318 | 9.13E-08 | 1.36E-06 | 6054.62 | 5995.82 | 6241.11 | 8418.13 | 9165.24 | 8032.15 | Up   |
| Tbcl1d10b | 2872.47 | 0.21741 | 0.10093 | 2.15408 | 0.03123  | 0.09449  | 2657.73 | 2527.89 | 2783.48 | 3145.4  | 3259.95 | 2860.37 | Up   |
| Septin1   | 732.882 | -0.2707 | 0.13665 | -1.9809 | 0.04761  | 0.1314   | 899.776 | 750.317 | 754.357 | 623.066 | 658.96  | 710.818 | Down |
| Dctpp1    | 269.874 | 0.38097 | 0.18785 | 2.02807 | 0.04255  | 0.12028  | 271.868 | 222.316 | 209.119 | 288.207 | 343.208 | 284.528 | Up   |
| Sephs2    | 1477.65 | 0.53305 | 0.14569 | 3.65887 | 0.00025  | 0.0017   | 1380.62 | 1221.78 | 1020.77 | 1819.44 | 1822.7  | 1600.6  | Up   |
| Itgal     | 3156.75 | 0.4022  | 0.14052 | 2.86214 | 0.00421  | 0.01875  | 2862.84 | 2985.93 | 2309.86 | 3270.84 | 3978.05 | 3532.98 | Up   |
| Zfp764    | 646.58  | -0.3389 | 0.12858 | -2.6358 | 0.00839  | 0.03306  | 768.196 | 646.825 | 751.493 | 581.598 | 572.366 | 559.003 | Down |
| Gm45184   | 25.3209 | -1.797  | 0.58216 | -3.0868 | 0.00202  | 0.01007  | 31.9275 | 41.2051 | 44.8795 | 17.6242 | 4.2241  | 12.0648 | Down |
| Bcl7c     | 1080.73 | -0.2937 | 0.11083 | -2.6502 | 0.00804  | 0.03196  | 1148.42 | 1127.87 | 1294.82 | 965.182 | 956.759 | 991.325 | Down |
| Fbxl19    | 1705.08 | 0.50604 | 0.09958 | 5.08194 | 3.74E-07 | 5.05E-06 | 1391.27 | 1325.27 | 1510.62 | 2035.07 | 1990.61 | 1977.62 | Up   |
| Setd1a    | 157.697 | 0.65889 | 0.24131 | 2.73044 | 0.00632  | 0.02629  | 143.19  | 93.9093 | 129.864 | 176.242 | 184.804 | 218.172 | Up   |
| Vkorc1    | 212.629 | -0.4655 | 0.21964 | -2.1193 | 0.03406  | 0.10107  | 282.51  | 249.147 | 208.164 | 200.086 | 190.085 | 145.783 | Down |
| Kat8      | 1478.31 | -0.295  | 0.12059 | -2.446  | 0.01445  | 0.05151  | 1633.14 | 1450.8  | 1802.82 | 1347.73 | 1284.13 | 1351.26 | Down |
| Prss8     | 5772.84 | 0.35186 | 0.1438  | 2.44687 | 0.01441  | 0.0514   | 5455.74 | 4683.01 | 5078.07 | 7189.62 | 6919.08 | 5311.53 | Up   |
| Prss36    | 287.844 | -0.6307 | 0.1649  | -3.8246 | 0.00013  | 0.00096  | 320.243 | 387.136 | 341.848 | 230.151 | 236.55  | 211.134 | Down |
| Pycard    | 306.972 | 0.40232 | 0.16334 | 2.46312 | 0.01377  | 0.04966  | 282.51  | 275.02  | 235.856 | 319.308 | 361.161 | 367.977 | Up   |
| Trim72    | 159.562 | -3.5406 | 0.60219 | -5.8796 | 4.11E-09 | 8.14E-08 | 158.67  | 596.995 | 126.045 | 21.771  | 12.6723 | 41.2214 | Down |
| Itgax     | 6091.45 | 2.74899 | 0.28746 | 9.56299 | 1.14E-21 | 1.16E-19 | 2478.74 | 1250.53 | 1003.58 | 9928.63 | 12240.4 | 9646.82 | Up   |
| Itgad     | 120.188 | 2.24251 | 0.24933 | 8.99418 | 2.38E-19 | 1.96E-17 | 44.5051 | 44.0799 | 37.2404 | 174.168 | 206.981 | 214.15  | Up   |
| Tgfb1i1   | 3757.85 | -0.4038 | 0.17535 | -2.3029 | 0.02128  | 0.07003  | 3435.6  | 3999.77 | 5405.59 | 3226.26 | 3461.65 | 3018.21 | Down |
| Rgs10     | 929.775 | 0.9059  | 0.15442 | 5.86644 | 4.45E-09 | 8.76E-08 | 719.821 | 582.621 | 638.817 | 1045.01 | 1372.83 | 1219.55 | Up   |
| Gm40457   | 26.593  | -5.2363 | 1.11299 | -4.7047 | 2.54E-06 | 2.87E-05 | 27.09   | 113.075 | 15.2781 | 3.11015 | 0       | 1.0054  | Down |
| Sec23ip   | 3467.77 | 0.20055 | 0.07874 | 2.54712 | 0.01086  | 0.04094  | 3300.15 | 3216.87 | 3164.48 | 3664.79 | 3674.97 | 3785.33 | Up   |
| Fgfr2     | 14711.1 | 0.7695  | 0.09937 | 7.74383 | 9.65E-15 | 4.71E-13 | 11666.1 | 10428.7 | 10540   | 18143.6 | 17543.7 | 19944.1 | Up   |
| Dhx32     | 2462.37 | 0.42363 | 0.09953 | 4.25636 | 2.08E-05 | 0.00019  | 2059.81 | 2225.08 | 2025.31 | 2663.32 | 2989.61 | 2811.1  | Up   |
| Fank1     | 1334.4  | -0.7816 | 0.25648 | -3.0476 | 0.00231  | 0.01123  | 1395.14 | 1954.85 | 1712.11 | 1088.55 | 604.047 | 1251.72 | Down |
| Dock1     | 3909.07 | 0.61368 | 0.1316  | 4.66323 | 3.11E-06 | 3.45E-05 | 3510.1  | 2731.04 | 3028.89 | 4284.75 | 5001.34 | 4898.31 | Up   |
| Ptpre     | 2430.06 | 0.3183  | 0.16102 | 1.97673 | 0.04807  | 0.13238  | 2095.61 | 2155.12 | 2238.25 | 2434.21 | 3350.77 | 2306.39 | Up   |
| Mki67     | 570.511 | 0.92671 | 0.21156 | 4.38032 | 1.19E-05 | 0.00011  | 366.683 | 492.545 | 320.841 | 800.345 | 606.159 | 836.494 | Up   |
| Gm6249    | 2.56193 | -4.7537 | 1.99293 | -2.3853 | 0.01707  | 0.05892  | 4.83751 | 8.62433 | 1.90977 | 0       | 0       | 0       | Down |
| 9430038lC | 445.171 | 0.3902  | 0.1693  | 2.30481 | 0.02118  | 0.06973  | 361.846 | 401.51  | 392.457 | 493.477 | 592.43  | 429.306 | Up   |
| Tcerg1l   | 41.2633 | -1.4253 | 0.41045 | -3.4726 | 0.00052  | 0.00318  | 44.5051 | 78.5772 | 57.293  | 22.8077 | 24.2886 |         |      |

|           |         |         |         |         |          |          |         |         |         |         |         |         |      |
|-----------|---------|---------|---------|---------|----------|----------|---------|---------|---------|---------|---------|---------|------|
| Cfap46    | 2253.35 | -0.5964 | 0.22797 | -2.6162 | 0.00889  | 0.03465  | 2435.2  | 3044.39 | 2658.39 | 2100.39 | 1155.29 | 2126.42 | Down |
| Adam8     | 7713.36 | 1.74184 | 0.58786 | 2.96303 | 0.00305  | 0.01428  | 2423.59 | 6105.07 | 2123.66 | 14467.4 | 7378.45 | 13782   | Up   |
| Zfp511    | 1295.01 | -0.4747 | 0.10411 | -4.5599 | 5.12E-06 | 5.40E-05 | 1496.72 | 1511.17 | 1510.62 | 1170.45 | 1025.4  | 1055.67 | Down |
| Msx3      | 11.3352 | 1.77698 | 0.78711 | 2.25759 | 0.02397  | 0.07706  | 3.87001 | 9.58259 | 1.90977 | 18.6609 | 16.8964 | 17.0918 | Up   |
| Echs1     | 5515.75 | -0.3307 | 0.15958 | -2.0722 | 0.03824  | 0.11062  | 5284.49 | 7676.61 | 5474.34 | 5005.26 | 4717.27 | 4936.52 | Down |
| Paox      | 787.375 | 0.37734 | 0.10578 | 3.56729 | 0.00036  | 0.00233  | 701.439 | 683.238 | 670.328 | 917.494 | 866.997 | 884.753 | Up   |
| Mtg1      | 777.923 | -0.2668 | 0.13316 | -2.0039 | 0.04508  | 0.12578  | 791.416 | 926.636 | 830.748 | 673.865 | 778.291 | 666.581 | Down |
| Sirt3     | 1298.92 | -0.4172 | 0.14466 | -2.8842 | 0.00392  | 0.01769  | 1395.14 | 1620.42 | 1440.92 | 1240.95 | 939.863 | 1156.21 | Down |
| Cox8b     | 98.3802 | -4.1752 | 0.57997 | -7.1989 | 6.07E-13 | 2.26E-11 | 106.425 | 351.681 | 101.218 | 6.2203  | 12.6723 | 12.0648 | Down |
| Pkp3      | 1430    | 0.32347 | 0.09713 | 3.3302  | 0.00087  | 0.00494  | 1288.71 | 1218.91 | 1303.42 | 1662.89 | 1559.75 | 1546.31 | Up   |
| Ano9      | 298.834 | 1.12273 | 0.22608 | 4.96596 | 6.84E-07 | 8.79E-06 | 242.843 | 175.361 | 146.097 | 449.935 | 410.794 | 367.977 | Up   |
| Rnh1      | 12267.4 | 0.50697 | 0.10566 | 4.79819 | 1.60E-06 | 1.89E-05 | 10597   | 10062.7 | 9741.72 | 15000.2 | 15332.4 | 12870.1 | Up   |
| Lrrc56    | 1254.1  | -0.7123 | 0.18496 | -3.8513 | 0.00012  | 0.00087  | 1493.82 | 1715.28 | 1463.84 | 1051.23 | 707.537 | 1092.87 | Down |
| Irf7      | 2411.48 | 1.33678 | 0.16017 | 8.34582 | 7.07E-17 | 4.59E-15 | 1496.72 | 1426.85 | 1180.24 | 3574.6  | 2852.32 | 3938.16 | Up   |
| Cdhr5     | 321.97  | 3.82175 | 0.28702 | 13.3152 | 1.89E-40 | 9.71E-38 | 26.1225 | 62.2868 | 39.1502 | 602.332 | 513.228 | 688.7   | Up   |
| Eps8l2    | 1929.23 | 0.33607 | 0.12247 | 2.74405 | 0.00607  | 0.02539  | 1738.6  | 1522.67 | 1855.34 | 2333.65 | 2055.03 | 2070.12 | Up   |
| Taldo1    | 11399.3 | 0.45541 | 0.14612 | 3.11665 | 0.00183  | 0.00925  | 10676.4 | 9642.96 | 8525.19 | 13967.7 | 14578.4 | 11005.1 | Up   |
| Chid1     | 1674.1  | 0.39809 | 0.10563 | 3.76862 | 0.00016  | 0.00118  | 1563.48 | 1392.35 | 1377.9  | 1864.02 | 1996.94 | 1849.94 | Up   |
| Muc5ac    | 613.709 | 1.28474 | 0.31398 | 4.09181 | 4.28E-05 | 0.00036  | 316.373 | 522.251 | 232.991 | 797.234 | 643.119 | 1170.29 | Up   |
| Tollip    | 6466.28 | 0.2088  | 0.09103 | 2.29384 | 0.0218   | 0.07135  | 6304.24 | 5853.04 | 5840.06 | 6690.96 | 7373.17 | 736.19  | Up   |
| Brsk2     | 22.4501 | -1.6232 | 0.61003 | -2.6609 | 0.00779  | 0.03113  | 29.025  | 27.7895 | 44.8795 | 4.14686 | 14.7844 | 14.0756 | Down |
| Mob2      | 2914.08 | -0.3606 | 0.12995 | -2.7745 | 0.00553  | 0.02358  | 2790.27 | 3317.49 | 3721.18 | 2530.62 | 2567.2  | 2557.74 | Down |
| Dusp8     | 1883.23 | -0.4704 | 0.15533 | -3.0283 | 0.00246  | 0.01188  | 2116.89 | 1886.81 | 2559.09 | 1500.13 | 1448.87 | 1787.6  | Down |
| Gm32786   | 40.8409 | 1.60821 | 0.51542 | 3.12019 | 0.00181  | 0.00915  | 22.2525 | 25.873  | 12.4135 | 93.3044 | 35.9049 | 55.297  | Up   |
| Gm39115   | 5.28124 | 3.95638 | 1.70257 | 2.32377 | 0.02014  | 0.06711  | 0       | 1.91652 | 0       | 18.6609 | 1.05603 | 10.054  | Up   |
| Gm7579    | 4.3153  | 5.61018 | 1.65059 | 3.39889 | 0.00068  | 0.00401  | 0       | 0       | 0       | 8.29373 | 10.5603 | 7.03781 | Up   |
| Krtap5-5  | 158.605 | 4.53375 | 0.40602 | 11.1664 | 5.96E-29 | 1.10E-26 | 12.5775 | 22.9982 | 3.81953 | 273.693 | 337.928 | 300.615 | Up   |
| Gm40460   | 24.6513 | 2.82851 | 0.67147 | 4.2124  | 2.53E-05 | 0.00022  | 4.83751 | 11.4991 | 1.90977 | 41.4686 | 57.0254 | 31.1674 | Up   |
| Ifitm10   | 899.586 | -0.7782 | 0.15615 | -4.9837 | 6.24E-07 | 8.10E-06 | 933.639 | 1268.73 | 1206.97 | 675.939 | 695.921 | 616.311 | Down |
| Ctsd      | 6960.05 | 1.81175 | 0.24681 | 7.3406  | 2.13E-13 | 8.54E-12 | 4165.09 | 2887.23 | 2205.78 | 9038.09 | 14052.5 | 9411.56 | Up   |
| Syt8      | 83.8491 | 1.60216 | 0.3942  | 4.06436 | 4.82E-05 | 0.0004   | 21.285  | 62.2868 | 41.06   | 137.883 | 110.883 | 129.697 | Up   |
| Lsp1      | 3600.7  | 0.42864 | 0.15727 | 2.72547 | 0.00642  | 0.02661  | 3407.54 | 3123.92 | 2677.49 | 3814.08 | 4929.53 | 3651.62 | Up   |
| Tnnt3     | 107.509 | -1.6139 | 0.44911 | -3.5936 | 0.00033  | 0.00213  | 84.1726 | 281.728 | 120.315 | 53.9092 | 49.6332 | 55.297  | Down |
| Mrp123    | 1313.12 | -0.2986 | 0.11431 | -2.612  | 0.009    | 0.03499  | 1342.89 | 1486.26 | 1516.35 | 1274.12 | 1132.06 | 1127.05 | Down |
| Ins2      | 14.1114 | -2.1509 | 0.73762 | -2.916  | 0.00355  | 0.01624  | 19.35   | 17.2487 | 32.466  | 7.25701 | 6.33615 | 2.0108  | Down |
| Tspan32   | 451.272 | 0.42834 | 0.20638 | 2.07549 | 0.03794  | 0.10998  | 474.076 | 362.222 | 317.976 | 461.339 | 611.439 | 480.582 | Up   |
| R74862    | 162.563 | -0.5335 | 0.24112 | -2.2127 | 0.02692  | 0.08447  | 183.825 | 154.28  | 238.721 | 120.259 | 142.563 | 135.729 | Down |
| Kcnq1     | 2322.5  | 0.96037 | 0.11793 | 8.14377 | 3.83E-16 | 2.28E-14 | 1677.65 | 1665.45 | 1387.44 | 2898.66 | 3123.72 | 3182.09 | Up   |
| Cdkn1c    | 1610.26 | -0.3652 | 0.1837  | -1.9881 | 0.0468   | 0.12953  | 1617.66 | 1846.56 | 1974.7  | 1792.48 | 1239.77 | 1190.39 | Down |
| Slc22a18  | 1356.03 | 0.79953 | 0.13118 | 6.095   | 1.09E-09 | 2.41E-08 | 938.476 | 1135.54 | 894.725 | 1742.72 | 1788.91 | 1635.79 | Up   |
| Tnfrsf26  | 413.117 | 2.02417 | 0.21582 | 9.37893 | 6.66E-21 | 6.25E-19 | 201.24  | 136.073 | 151.826 | 587.818 | 801.523 | 600.224 | Up   |
| Tnfrsf23  | 41.2399 | 1.42051 | 0.46126 | 3.07962 | 0.00207  | 0.01026  | 31.9275 | 22.9982 | 12.4135 | 48.7256 | 55.9693 | 75.4051 | Up   |
| Mrgpre    | 269.748 | 0.5685  | 0.26287 | 2.16264 | 0.03057  | 0.09303  | 275.738 | 228.066 | 148.007 | 318.272 | 375.945 | 272.464 | Up   |
| Dhcr7     | 1737.25 | 1.69648 | 0.19728 | 8.59948 | 8.01E-18 | 5.96E-16 | 904.614 | 949.634 | 603.486 | 2492.26 | 3105.77 | 2367.72 | Up   |
| Shank2    | 1205.02 | -0.4532 | 0.22625 | -2.0029 | 0.04519  | 0.12602  | 1290.65 | 1415.35 | 1472.43 | 1073    | 672.688 | 1306.02 | Down |
| Ctnn      | 8919    | 0.29214 | 0.07608 | 3.84009 | 0.00012  | 0.00091  | 8030.26 | 7834.72 | 8191.94 | 9849.84 | 10086.1 | 9521.15 | Up   |
| Ano1      | 6415.35 | 0.5449  | 0.17018 | 3.20197 | 0.00136  | 0.00725  | 6617.71 | 4426.2  | 4610.17 | 7893.55 | 7931.81 | 7012.67 | Up   |
| Ccnd1     | 4051.73 | 0.70379 | 0.17278 | 4.07343 | 4.63E-05 | 0.00038  | 3770.35 | 2501.06 | 2976.37 | 4527.34 | 5697.26 | 4837.99 | Up   |
| Tpcn2     | 2858.33 | 0.50403 | 0.15068 | 3.34498 | 0.00082  | 0.00472  | 2107.22 | 2237.53 | 2747.2  | 3113.26 | 3848.16 | 3096.63 | Up   |
| Tex45     | 15.7847 | -1.5048 | 0.62168 | -2.4205 | 0.0155   | 0.05447  | 22.2525 | 20.1234 | 27.6916 | 5.18358 | 7.39218 | 12.0648 | Down |
| Zfp358    | 1390.72 | -0.4293 | 0.09411 | -4.5619 | 5.07E-06 | 5.36E-05 | 1577.03 | 1646.29 | 1565.05 | 1226.43 | 1174.3  | 1155.21 | Down |
| Pnpla6    | 3233.66 | 0.32762 | 0.08954 | 3.66137 | 0.00025  | 0.00169  | 2755.44 | 2789.49 | 3058.49 | 3604.66 | 3632.73 | 3561.13 | Up   |
| Camsap3   | 1599.01 | 1.11631 | 0.11967 | 9.32821 | 1.08E-20 | 9.93E-19 | 1020.71 | 949.634 | 1058.01 | 2119.05 | 2427.8  | 2018.84 | Up   |
| Stxbp2    | 6437.48 | 0.83215 | 0.1144  | 7.27406 | 3.49E-13 | 1.36E-11 | 5070.68 | 4382.12 | 4439.25 | 8317.57 | 8914.97 | 7500.29 | Up   |
| Retn      | 171.806 | -5.1617 | 1.01508 | -5.085  | 3.68E-07 | 4.98E-06 | 148.995 | 581.663 | 272.142 | 1.03672 | 17.9524 | 9.04861 | Down |
| Mcomp1    | 1873.35 | 2.43339 | 0.51385 | 4.73559 | 2.18E-06 | 2.50E-05 | 950.086 | 496.378 | 309.382 | 2779.44 | 4085.76 | 2619.07 | Up   |
| Fcor      | 38.8242 | 1.80341 | 0.41425 | 4.35342 | 1.34E-05 | 0.00013  | 18.3825 | 17.2487 | 16.233  | 47.6889 | 77.0899 | 56.3024 | Up   |
| Fcer2a    | 986.433 | 1.59224 | 0.22961 | 6.93466 | 4.07E-12 | 1.33E-10 | 679.186 | 420.676 | 374.314 | 1367.43 | 1393.95 | 1683.04 | Up   |
| Cd209a    | 278.901 | -1.5167 | 0.33755 | -4.4933 | 7.01E-06 | 7.18E-05 | 228.33  | 427.383 | 584.388 | 154.471 | 111.939 | 166.897 | Down |
| Cd209d    | 55.4236 | -2.1844 | 0.4181  | -5.2246 | 1.75E-07 | 2.49E-06 | 69.6601 | 124.574 | 78.3004 | 25.9179 | 19.0085 | 15.081  | Down |
| Cd209b    | 114.751 | -2.1685 | 0.4108  | -5.2786 | 1.30E-07 | 1.89E-06 | 130.613 | 263.521 | 169.014 | 23.8445 | 62.3055 | 39.2106 | Down |
| Cd209f    | 253.854 | -3.2137 | 0.32638 | -9.8464 | 7.11E-23 | 7.90E-21 | 413.123 | 642.033 | 319.886 | 37.3218 | 45.4091 | 65.3511 | Down |
| Cd209g    | 93.9469 | -3.054  | 0.47531 | -6.4252 | 1.32E-10 | 3.43E-09 | 150.93  | 250.106 | 102.172 | 11.4039 | 16.8964 | 32.1728 | Down |
| Lrrc8e    | 831.792 | 0.81842 | 0.13543 | 6.04308 | 1.51E-09 | 3.23E-08 | 688.861 | 539.5   | 577.704 | 1037.75 | 1057.08 | 1089.85 | Up   |
| Ctxn1     | 1846.77 | -0.4461 | 0.18128 | -2.4607 | 0.01387  | 0.04991  | 2028.85 | 2304.61 | 2056.82 | 1729.24 | 1157.4  | 1803.69 | Down |
| Timm44    | 2252.11 | -0.2322 | 0.0979  | -2.3721 | 0.01769  | 0.06056  | 2357.8  | 2545.13 | 2395.8  | 2128.38 | 2152.18 | 1933.39 | Down |
| Cers4     | 3072.3  | -0.5285 | 0.10363 | -5.0998 | 3.40E-07 | 4.64E-06 | 3758.74 | 3360.61 | 3767.01 | 2368.9  | 2679.14 | 2499.43 | Down |
| Vmn2r-ps  | 9.39636 | -1.994  | 0.85587 | -2.3298 | 0.01981  | 0.06633  | 11.61   | 15.3321 | 18.1428 | 1.03672 | 4.2241  | 6.03241 | Down |
| Shcbp1    | 60.937  | 0.96547 | 0.39846 | 2.42299 | 0.01539  | 0.05417  | 36.7651 | 56.5373 | 30.5563 | 96.4146 | 53.8573 | 91.4915 | Up   |
| Gm5605    | 4.30286 | 5.60649 | 1.70333 | 3.2915  | 0.001    | 0.00556  | 0       | 0       | 0       | 4.14686 | 11.6163 | 10.054  | Up   |
| Efnb2     | 6610.45 | -0.5297 | 0.12967 | -4.0849 | 4.41E-05 | 0.00037  | 7830.96 | 6719.31 | 8881.37 | 5609.67 | 5061.53 | 5559.87 | Down |
| Arglu1    | 8549.29 | -0.2968 | 0.07999 | -3.711  | 0.00021  | 0.00143  | 9002.6  | 9494.43 | 9779.91 | 7585.65 | 7849.44 | 7583.74 | Down |
| Abhd13    | 2955.48 | 0.3147  | 0.10284 | 3.05997 | 0.00221  | 0.01084  | 2832.84 | 2482.85 | 2587.73 | 3160.95 | 3180.75 | 3487.74 | Up   |
| Myo16     | 55.167  | -2.1495 | 0.5501  | -3.9074 | 9.33E-05 | 0.00071  | 37.7326 | 98.7006 | 133.684 | 30.0648 | 13.7283 | 17.0918 | Down |
| 9530052E1 | 120.607 | -0.6313 | 0.21417 | -2.9476 | 0.0032   | 0.01491  | 147.06  | 137.031 | 155.646 | 96.4146 | 93.9863 | 93.5023 | Down |
| Col4a1    | 10569.2 | 0.69563 | 0.14767 | 4.71059 | 2.47E-06 | 2.80E-05 | 9177.72 | 6910.96 | 8119.37 | 12944.4 | 14783.3 | 11479.7 | Up   |
| Rab20     | 1001.96 | 1.07785 | 0.11751 | 9.17213 | 4.64E-20 | 4.05E-18 | 710.146 |         |         |         |         |         |      |

|           |         |         |         |         |          |          |         |         |         |           |         |         |      |
|-----------|---------|---------|---------|---------|----------|----------|---------|---------|---------|-----------|---------|---------|------|
| Atp11a    | 3285.22 | 1.9273  | 0.20387 | 9.45374 | 3.27E-21 | 3.19E-19 | 1774.4  | 1189.2  | 1140.13 | 4438.18   | 4936.92 | 6232.48 | Up   |
| Mcf2l     | 4676.29 | -0.4498 | 0.14615 | -3.0774 | 0.00209  | 0.01033  | 6043.01 | 4932.16 | 5223.21 | 4212.18   | 3294.8  | 4352.38 | Down |
| F7        | 2945.26 | 3.01055 | 0.25899 | 11.6244 | 3.10E-31 | 6.82E-29 | 944.281 | 577.83  | 428.742 | 4990.75   | 6151.35 | 4578.6  | Up   |
| F10       | 869.437 | 2.53043 | 0.19431 | 13.0226 | 9.10E-39 | 4.01E-36 | 297.99  | 290.352 | 181.428 | 1467.99   | 1528.07 | 1450.79 | Up   |
| Proz      | 1043.75 | 2.04312 | 0.34087 | 5.99379 | 2.05E-09 | 4.25E-08 | 409.253 | 561.54  | 252.089 | 1595.51   | 997.944 | 2446.14 | Up   |
| Gm17023   | 34.4516 | 1.02536 | 0.46449 | 2.20753 | 0.02728  | 0.0853   | 19.35   | 22.9982 | 25.7818 | 50.7991   | 27.4567 | 60.3241 | Up   |
| Cul4a     | 5692.36 | 0.28829 | 0.08227 | 3.5041  | 0.00046  | 0.00288  | 5168.39 | 5282.88 | 4925.29 | 6033.69   | 6322.42 | 6421.5  | Up   |
| Lamp1     | 12504.1 | 0.73891 | 0.13384 | 5.52104 | 3.37E-08 | 5.52E-07 | 11124.3 | 8367.51 | 8618.77 | 15123.6   | 16119.2 | 15671.2 | Up   |
| Grtp1     | 1356.32 | -0.3728 | 0.13984 | -2.666  | 0.00768  | 0.03074  | 1491.89 | 1654.91 | 1444.74 | 1095.81   | 1371.78 | 1078.8  | Down |
| 2810030D  | 167.19  | -0.6558 | 0.26866 | -2.4409 | 0.01465  | 0.05208  | 208.013 | 174.403 | 231.082 | 107.818   | 174.244 | 107.578 | Down |
| Adprhl1   | 202.258 | -4.5564 | 0.84501 | -5.3922 | 6.96E-08 | 1.07E-06 | 146.093 | 838.476 | 179.518 | 19.6976   | 12.6723 | 17.0918 | Down |
| Tmco3     | 3505.93 | 0.42551 | 0.09038 | 4.70819 | 2.50E-06 | 2.83E-05 | 3046.66 | 3122.96 | 2808.31 | 4118.87   | 3903.07 | 4035.68 | Up   |
| Tfdp1     | 2853.72 | 0.24434 | 0.0857  | 2.85119 | 0.00436  | 0.0193   | 2498.09 | 2721.45 | 2618.29 | 3101.85   | 3134.28 | 3048.38 | Up   |
| Tmem255   | 39.7042 | -1.776  | 0.42606 | -4.1684 | 3.07E-05 | 0.00027  | 54.1801 | 77.619  | 52.5186 | 18.6609   | 22.1765 | 13.0702 | Down |
| Coprs     | 407.063 | 0.40668 | 0.18036 | 2.25487 | 0.02414  | 0.07746  | 317.34  | 415.884 | 317.021 | 412.613   | 466.763 | 512.754 | Up   |
| Fbxo25    | 1680.86 | 0.31508 | 0.09607 | 3.27989 | 0.00104  | 0.00575  | 1525.75 | 1550.46 | 1418    | 1803.89   | 1860.72 | 1926.35 | Up   |
| Erich1    | 604.662 | 0.31554 | 0.11981 | 2.63375 | 0.00844  | 0.03322  | 567.923 | 544.291 | 504.178 | 665.572   | 687.473 | 658.538 | Up   |
| Gm10699   | 30.4991 | -1.1782 | 0.5582  | -2.1107 | 0.0348   | 0.10277  | 51.2776 | 39.2886 | 36.2855 | 9.33044   | 32.7368 | 14.0756 | Down |
| Cln8      | 1485.15 | 0.28411 | 0.14016 | 2.0271  | 0.04265  | 0.12048  | 1204.54 | 1440.26 | 1373.12 | 1553      | 1867.05 | 1472.91 | Up   |
| Myom2     | 990.965 | -4.291  | 0.74811 | -5.7357 | 9.71E-09 | 1.77E-07 | 1401.91 | 3523.52 | 731.44  | 79.8271   | 62.3055 | 146.789 | Down |
| Agpat5    | 1648.16 | -0.2527 | 0.0928  | -2.7235 | 0.00646  | 0.02672  | 1823.74 | 1752.66 | 1799.95 | 1467.99   | 1578.76 | 1465.87 | Down |
| Defb1     | 8.73783 | -2.6267 | 1.2987  | -2.0225 | 0.04312  | 0.12153  | 6.77251 | 35.4556 | 2.86465 | 3.11015   | 4.2241  | 0       | Down |
| Atp7b     | 3402.82 | -0.768  | 0.19354 | -3.968  | 7.25E-05 | 0.00057  | 4411.81 | 4576.64 | 3874.91 | 2644.66   | 1814.25 | 3094.62 | Down |
| Alg11     | 1396.03 | 0.2212  | 0.11109 | 1.99111 | 0.04647  | 0.12884  | 1318.7  | 1228.49 | 1320.6  | 1384.02   | 1501.67 | 1622.72 | Up   |
| Nek5      | 2503.3  | -0.5675 | 0.22829 | -2.4858 | 0.01293  | 0.04714  | 2671.27 | 3157.46 | 3139.65 | 2237.23   | 1293.63 | 2520.54 | Down |
| Kcap2     | 145.368 | 1.23275 | 0.31518 | 3.91132 | 9.18E-05 | 0.0007   | 98.6851 | 103.492 | 58.2479 | 214.6     | 147.844 | 249.339 | Up   |
| Thsd1     | 2191.57 | -0.3643 | 0.14041 | -2.5948 | 0.00946  | 0.0365   | 2344.26 | 2166.62 | 2889.48 | 1875.42   | 2051.86 | 1821.79 | Down |
| Mrps31    | 1009.21 | -0.2976 | 0.11369 | -2.6174 | 0.00886  | 0.03454  | 1101.98 | 1205.49 | 1031.27 | 886.392   | 929.302 | 900.839 | Down |
| Slc20a2   | 2152.31 | -0.4171 | 0.19218 | -2.1701 | 0.03     | 0.09178  | 2172.04 | 3223.58 | 1988.07 | 1760.34   | 2004.34 | 1765.48 | Down |
| Vdac3     | 6328.36 | -0.3467 | 0.11185 | -3.0996 | 0.00194  | 0.00971  | 6454.2  | 7949.71 | 6851.28 | 5794.2    | 5475.49 | 5445.25 | Down |
| Polb      | 2057.09 | -0.3647 | 0.11059 | -3.2975 | 0.00098  | 0.00547  | 2117.86 | 2268.2  | 2561    | 1781.08   | 1824.81 | 1789.61 | Down |
| Plat      | 3604.04 | -0.6946 | 0.25453 | -2.7289 | 0.00635  | 0.02639  | 3090.2  | 3757.33 | 6518.03 | 2563.8    | 3193.42 | 2501.44 | Down |
| Ank1      | 105.501 | -1.2042 | 0.51968 | -2.3172 | 0.02049  | 0.06803  | 91.9126 | 284.603 | 64.932  | 65.3131   | 53.8573 | 72.3889 | Down |
| Sfrp1     | 1320.29 | 0.27637 | 0.1364  | 2.0261  | 0.04275  | 0.12069  | 1164.87 | 1374.14 | 1043.69 | 1382.98   | 1450.98 | 1505.09 | Up   |
| Ido1      | 91.2878 | -0.9383 | 0.41078 | -2.2843 | 0.02236  | 0.07279  | 92.8801 | 147.572 | 119.36  | 37.3218   | 100.322 | 50.27   | Down |
| Adam3     | 277.378 | -1.1109 | 0.23475 | -4.7324 | 2.22E-06 | 2.53E-05 | 301.86  | 344.015 | 491.765 | 176.242   | 157.348 | 193.037 | Down |
| Adam9     | 10932.2 | 0.72898 | 0.11647 | 6.25903 | 3.87E-10 | 9.20E-09 | 8303.1  | 8216.11 | 8163.29 | 12392.9   | 15620.7 | 12897.3 | Up   |
| Tacc1     | 11550.6 | -0.342  | 0.08893 | -3.8454 | 0.00012  | 0.00089  | 12478.8 | 13289.1 | 12971.1 | 9812.52   | 10913   | 9838.85 | Down |
| 5430421F  | 21.4432 | -2.6746 | 0.81455 | -3.2835 | 0.00103  | 0.00569  | 22.2525 | 64.2033 | 24.827  | 1.03672   | 5.28013 | 11.0594 | Down |
| Gm31045   | 33.8144 | -2.4145 | 0.48978 | -4.9298 | 8.23E-07 | 1.04E-05 | 48.3751 | 60.3703 | 62.0674 | 16.5875   | 8.4482  | 7.03781 | Down |
| Fgfr1     | 3208.08 | -0.4243 | 0.10643 | -3.9863 | 6.71E-05 | 0.00053  | 3462.69 | 4044.81 | 3521.61 | 2712.05   | 2868.16 | 2639.18 | Down |
| Letm2     | 544.18  | -0.7609 | 0.20307 | -3.7471 | 0.00018  | 0.00127  | 591.143 | 688.988 | 773.455 | 375.291   | 329.48  | 506.722 | Down |
| D830025C  | 19.3158 | -1.96   | 0.61393 | -3.1926 | 0.00141  | 0.00744  | 34.8301 | 27.7895 | 29.6014 | 3.11015   | 9.50423 | 11.0594 | Down |
| Pomk      | 1045.43 | 0.33498 | 0.11369 | 2.94629 | 0.00322  | 0.01496  | 982.981 | 903.638 | 887.086 | 1148.68   | 1249.28 | 1100.91 | Up   |
| Erlin2    | 4502.75 | 0.34133 | 0.09166 | 3.72378 | 0.0002   | 0.00137  | 3793.57 | 4079.31 | 4044.88 | 4759.56   | 5025.62 | 5313.54 | Up   |
| Brf2      | 564.255 | -0.2849 | 0.13851 | -2.0566 | 0.03973  | 0.11391  | 637.583 | 642.992 | 578.659 | 469.632   | 566.03  | 490.636 | Down |
| Rab11fip1 | 7949    | 0.33136 | 0.13653 | 2.42703 | 0.01522  | 0.05371  | 7402.35 | 6224.85 | 7492.97 | 8389.1    | 10193.8 | 7990.93 | Up   |
| Got1l1    | 141.257 | -1.4282 | 0.39962 | -3.5739 | 0.00035  | 0.00228  | 99.6527 | 215.608 | 302.698 | 80.8638   | 61.2495 | 87.4699 | Down |
| Adrb3     | 858.373 | -1.6824 | 0.19637 | -8.5676 | 1.06E-17 | 7.78E-16 | 1145.52 | 1446.97 | 1333.97 | 388.768   | 514.284 | 320.723 | Down |
| Eif4ebp1  | 1731.09 | -0.4626 | 0.14732 | -3.1401 | 0.00169  | 0.00864  | 1846.96 | 2096.67 | 2074.96 | 1656.67   | 1503.78 | 1207.49 | Down |
| 5430430B  | 89.8851 | -0.9686 | 0.33643 | -2.8791 | 0.00399  | 0.01793  | 111.263 | 83.3685 | 162.33  | 54.9459   | 57.0254 | 70.3781 | Down |
| Gm26795   | 3.04317 | -3.9589 | 1.84138 | -2.15   | 0.03156  | 0.0953   | 1.935   | 11.4991 | 3.81953 | 0         | 0       | 1.0054  | Down |
| Unc5d     | 87.559  | 1.11141 | 0.28218 | 3.93871 | 8.19E-05 | 0.00064  | 62.8876 | 48.8712 | 54.4283 | 129.589   | 133.059 | 96.5185 | Up   |
| Dusp26    | 73.3706 | -1.9063 | 0.48435 | -3.9358 | 8.29E-05 | 0.00064  | 101.588 | 107.325 | 138.458 | 22.8077   | 55.9693 | 14.0756 | Down |
| Rnf122    | 829.328 | 0.4227  | 0.15367 | 2.75074 | 0.00595  | 0.025    | 737.236 | 624.785 | 763.906 | 966.219   | 1063.42 | 820.407 | Up   |
| Fut10     | 370.338 | -0.6075 | 0.26019 | -2.335  | 0.01954  | 0.06562  | 541.801 | 370.846 | 428.742 | 322.419   | 361.161 | 197.059 | Down |
| Nrg1      | 830.096 | -0.6486 | 0.15572 | -4.1653 | 3.11E-05 | 0.00027  | 921.061 | 993.714 | 1125.81 | 644.837   | 738.162 | 556.992 | Down |
| Purg      | 757.601 | -0.3167 | 0.12321 | -2.5707 | 0.01015  | 0.03869  | 919.126 | 812.603 | 789.688 | 652.094   | 665.296 | 706.797 | Down |
| Tex15     | 549.05  | 0.45583 | 0.17445 | 2.61289 | 0.00898  | 0.03492  | 544.703 | 380.429 | 464.073 | 639.654   | 579.758 | 685.683 | Up   |
| Gsr       | 6038.41 | 0.31268 | 0.15529 | 2.01357 | 0.04406  | 0.12357  | 5881.44 | 5646.06 | 4632.14 | 6984.35   | 7553.75 | 5532.72 | Up   |
| Rbpms     | 9708.39 | -0.5314 | 0.09277 | -5.728  | 1.02E-08 | 1.84E-07 | 10921.2 | 12359.6 | 11148.3 | 8135.11   | 8073.31 | 7612.9  | Down |
| Dctn6     | 4280.85 | -0.2694 | 0.0853  | -3.1588 | 0.00158  | 0.0082   | 4689.48 | 4695.47 | 4653.14 | 4073.26   | 3902.01 | 3671.72 | Down |
| Gm19410   | 15.0168 | -2.6428 | 0.96128 | -2.7493 | 0.00597  | 0.02507  | 7.74001 | 56.5373 | 13.3684 | 6.2203    | 4.2241  | 2.0108  | Down |
| Prag1     | 499.343 | 0.76509 | 0.2083  | 3.67296 | 0.00024  | 0.00162  | 351.203 | 363.18  | 395.322 | 590.928   | 806.803 | 488.625 | Up   |
| Gm6213    | 61.4643 | -2.4853 | 0.61597 | -4.0348 | 5.47E-05 | 0.00044  | 105.458 | 60.3703 | 147.052 | 38.3585   | 9.50423 | 8.04321 | Down |
| Msr1      | 840.551 | 2.85815 | 0.24098 | 11.8605 | 1.90E-32 | 4.53E-30 | 248.648 | 212.733 | 149.917 | 1088.55   | 1793.13 | 1550.33 | Up   |
| Micu3     | 851.22  | -0.4486 | 0.13231 | -3.3904 | 0.0007   | 0.00412  | 909.451 | 932.386 | 1105.75 | 712.224   | 686.416 | 761.088 | Down |
| Tmnr7     | 909.138 | 0.46717 | 0.15637 | 2.98763 | 0.00281  | 0.01331  | 800.124 | 739.776 | 749.583 | 1178.75   | 1131    | 855.596 | Up   |
| Slc7a2    | 4149.59 | 0.43028 | 0.13276 | 3.24091 | 0.00119  | 0.00646  | 3655.22 | 3525.43 | 3425.16 | 4339.69   | 5611.72 | 4340.32 | Up   |
| Mtus1     | 12644   | -0.648  | 0.11418 | -5.675  | 1.39E-08 | 2.44E-07 | 14311.3 | 16008.7 | 15990.5 | 9169.75   | 9343.71 | 11040.3 | Down |
| Fgl1      | 416.665 | 5.01651 | 0.67269 | 7.45741 | 8.82E-14 | 3.77E-12 | 21.285  | 46.9547 | 6.68418 | 786.867   | 889.173 | 749.024 | Up   |
| Asah1     | 14298.5 | 0.49756 | 0.15295 | 3.25301 | 0.00114  | 0.00625  | 13049.7 | 11210.7 | 11310.6 | 17563     | 19207   | 13450.3 | Up   |
| Frg1      | 1754.41 | -0.2481 | 0.09375 | -2.647  | 0.00812  | 0.03223  | 1864.38 | 1920.35 | 1929.82 | 1572.7    | 1694.92 | 1544.3  | Down |
| Gm6180    | 367.959 | 0.35302 | 0.14814 | 2.38308 | 0.01717  | 0.05912  | 294.12  | 323.891 | 351.397 | 431.274   | 413.962 | 393.112 | Up   |
| Fat1      | 5109.4  | 0.33572 | 0.10021 | 3.35005 | 0.00081  | 0.00465  | 4451.47 | 4475.07 | 4626.41 | 5388.85   | 5445.92 | 6268.67 | Up   |
| Cyp4v3    | 1850.92 | 1.00113 | 0.17841 | 5.61124 | 2.01E-08 | 3.41E-07 | 1537.36 | 1055.04 | 1107.66 | 2304.62   | 2273.62 | 2827.19 | Up   |
| Tlr3      | 2156.71 | 0.339   | 0.10011 | 3.38641 | 0.00071  | 0.00417  | 1866.31 | 1833.15 | 2013.85 | 2297.36</ |         |         |      |

|           |         |         |         |         |          |          |         |         |         |         |         |         |      |
|-----------|---------|---------|---------|---------|----------|----------|---------|---------|---------|---------|---------|---------|------|
| Acs1      | 5387.34 | -0.641  | 0.26156 | -2.4507 | 0.01426  | 0.05104  | 5700.52 | 9320.02 | 4674.15 | 4118.87 | 3225.1  | 5285.39 | Down |
| Cenpu     | 77.0675 | 0.7556  | 0.35081 | 2.15386 | 0.03125  | 0.09453  | 73.5301 | 34.4973 | 63.9772 | 106.782 | 97.1543 | 86.4645 | Up   |
| Primpol   | 252.788 | 0.36938 | 0.17143 | 2.15467 | 0.03119  | 0.0944   | 244.778 | 203.151 | 213.894 | 263.326 | 302.023 | 289.555 | Up   |
| Casp3     | 940.706 | 0.50734 | 0.15151 | 3.34853 | 0.00081  | 0.00467  | 912.354 | 727.318 | 691.335 | 1009.76 | 1176.41 | 1127.05 | Up   |
| Stox2     | 1369.38 | -0.593  | 0.16045 | -3.6958 | 0.00022  | 0.0015   | 1516.07 | 1825.48 | 1599.43 | 1066.78 | 915.574 | 1292.95 | Down |
| Trappc11  | 3445.18 | 0.21722 | 0.084   | 2.58601 | 0.00971  | 0.03729  | 3228.55 | 3087.51 | 3242.78 | 3593.26 | 3850.27 | 3668.71 | Up   |
| Gm8623    | 17.6532 | -1.1451 | 0.53812 | -2.128  | 0.03334  | 0.09932  | 23.22   | 23.9565 | 25.7818 | 9.33044 | 10.5603 | 13.0702 | Down |
| Gm9892    | 734.687 | 0.47958 | 0.12858 | 3.72997 | 0.00019  | 0.00135  | 551.476 | 642.992 | 646.456 | 892.612 | 872.277 | 802.31  | Up   |
| Neil3     | 101.835 | 0.7316  | 0.33756 | 2.16735 | 0.03021  | 0.09222  | 88.0426 | 96.7841 | 44.8795 | 133.736 | 109.827 | 137.74  | Up   |
| Spcs3     | 5224.89 | 0.24193 | 0.10067 | 2.40324 | 0.01625  | 0.05663  | 4495.98 | 4742.42 | 5124.86 | 5612.78 | 6023.57 | 5349.74 | Up   |
| Hpgd      | 38772.5 | -0.5588 | 0.12978 | -4.3057 | 1.66E-05 | 0.00015  | 41275.5 | 49890.8 | 47399.4 | 35195.5 | 31233   | 27640.5 | Down |
| Hand2os1  | 87.024  | -3.7453 | 0.52174 | -7.1785 | 7.05E-13 | 2.59E-11 | 144.158 | 229.982 | 111.721 | 22.8077 | 8.4482  | 5.027   | Down |
| 503342812 | 3.19375 | -5.0721 | 1.83791 | -2.7597 | 0.00579  | 0.02448  | 2.9025  | 7.66607 | 8.59395 | 0       | 0       | 0       | Down |
| Galnt7    | 1034.12 | 0.83227 | 0.12481 | 6.66846 | 2.58E-11 | 7.60E-10 | 737.236 | 776.19  | 718.072 | 1177.71 | 1436.19 | 1359.3  | Up   |
| Mfap3l    | 2677.12 | 1.21747 | 0.13515 | 9.00803 | 2.10E-19 | 1.73E-17 | 1795.68 | 1656.83 | 1377.9  | 3419.09 | 3968.54 | 3844.65 | Up   |
| Cln3      | 4212.08 | 0.22918 | 0.09437 | 2.42846 | 0.01516  | 0.05355  | 3627.16 | 4028.52 | 3979    | 4312.74 | 4613.77 | 4711.31 | Up   |
| B230317F  | 5.6363  | -2.8552 | 1.17763 | -2.4245 | 0.01533  | 0.054    | 6.77251 | 12.4574 | 10.5037 | 2.07343 | 0       | 2.0108  | Down |
| Palld     | 5125.39 | -1.0374 | 0.19317 | -5.3705 | 7.85E-08 | 1.19E-06 | 4966.19 | 8193.11 | 7518.75 | 3058.31 | 3781.63 | 3234.37 | Down |
| Gm45418   | 27.4175 | -1.9398 | 0.73316 | -2.6458 | 0.00815  | 0.03232  | 25.155  | 88.1598 | 17.1879 | 15.5507 | 7.39218 | 11.0594 | Down |
| Ddx60     | 679.751 | 0.55866 | 0.16841 | 3.31734 | 0.00091  | 0.00515  | 601.786 | 586.454 | 461.208 | 760.949 | 737.106 | 931.001 | Up   |
| Spock3    | 23.615  | -2.4672 | 0.55224 | -4.4675 | 7.91E-06 | 7.97E-05 | 32.895  | 51.746  | 35.3307 | 8.29373 | 7.39218 | 6.03241 | Down |
| Cpe       | 2114.47 | -1.7266 | 0.4668  | -3.6987 | 0.00022  | 0.00149  | 2741.9  | 5086.44 | 1914.54 | 1238.88 | 774.067 | 931.001 | Down |
| Msmo1     | 6128.52 | 1.15351 | 0.15267 | 7.55541 | 4.18E-14 | 1.88E-12 | 3989.01 | 4281.5  | 3132.97 | 8022.11 | 9591.88 | 7753.65 | Up   |
| Khlh2     | 2905.05 | -0.2213 | 0.08691 | -2.5459 | 0.0109   | 0.04105  | 2961.52 | 3228.37 | 3192.17 | 2709.98 | 2696.03 | 2642.19 | Down |
| Tmem192   | 796.235 | 0.34766 | 0.13079 | 2.65817 | 0.00786  | 0.03133  | 735.301 | 654.491 | 712.343 | 851.144 | 992.664 | 831.467 | Up   |
| Gm10663   | 19.9331 | 3.23395 | 0.78028 | 4.14458 | 3.40E-05 | 0.00029  | 0       | 3.83303 | 7.63906 | 31.1015 | 33.7928 | 43.2322 | Up   |
| Smin31    | 763.33  | 1.9323  | 0.23224 | 8.32028 | 8.78E-17 | 5.61E-15 | 233.168 | 427.383 | 290.284 | 1015.98 | 1282.01 | 1331.15 | Up   |
| Marchf1   | 935.766 | 1.13786 | 0.20142 | 5.64925 | 1.61E-08 | 2.80E-07 | 733.366 | 584.538 | 436.381 | 1221.25 | 1444.64 | 1194.42 | Up   |
| Npy1r     | 790.025 | 0.66419 | 0.19425 | 3.41918 | 0.00063  | 0.00376  | 674.349 | 688.03  | 471.712 | 895.722 | 871.221 | 1139.12 | Up   |
| Naf1      | 1484.74 | -0.3986 | 0.11531 | -3.4563 | 0.00055  | 0.00335  | 1610.89 | 1683.66 | 1771.31 | 1258.57 | 1177.47 | 1406.56 | Down |
| Psd3      | 3042.68 | -0.5125 | 0.14127 | -3.6276 | 0.00029  | 0.0019   | 3232.42 | 3938.44 | 3561.71 | 2186.43 | 262.65  | 2874.44 | Down |
| Sh2d4a    | 2885.58 | 0.92434 | 0.1455  | 6.35304 | 2.11E-10 | 5.31E-09 | 2316.2  | 1702.83 | 1955.6  | 3943.67 | 3993.89 | 3401.27 | Up   |
| Csgalnact | 1185.72 | -0.509  | 0.12089 | -4.2107 | 2.55E-05 | 0.00023  | 1269.36 | 1396.18 | 1512.53 | 948.595 | 1047.58 | 940.05  | Down |
| Lpl       | 16320   | -0.6124 | 0.28095 | -2.1797 | 0.02928  | 0.09026  | 17838.8 | 27151.3 | 14207.7 | 15364.1 | 15306   | 8052.26 | Down |
| Slc18a1   | 208.917 | 1.4949  | 0.20762 | 7.2003  | 6.01E-13 | 2.25E-11 | 99.6527 | 127.448 | 101.218 | 290.28  | 283.015 | 351.89  | Up   |
| Atp6v1b2  | 11610.7 | 0.84773 | 0.09628 | 8.80453 | 1.31E-18 | 1.02E-16 | 8903.92 | 8146.16 | 7832.9  | 14527.5 | 15836.2 | 14417.4 | Up   |
| D130040f  | 144.058 | 0.65861 | 0.29966 | 2.19786 | 0.02796  | 0.08709  | 125.775 | 118.824 | 90.7139 | 137.883 | 147.844 | 243.307 | Up   |
| Gm43263   | 4.67158 | -3.6379 | 1.52165 | -2.3907 | 0.01681  | 0.05822  | 6.77251 | 13.4156 | 5.7293  | 0       | 2.11205 | 0       | Down |
| Zfp869    | 2762.16 | -0.2432 | 0.10358 | -2.3481 | 0.01887  | 0.0638   | 2929.59 | 2875.73 | 3177.85 | 2705.83 | 2532.35 | 2351.63 | Down |
| Zfp963    | 353.469 | -0.4642 | 0.19019 | -2.4408 | 0.01465  | 0.05208  | 375.391 | 446.549 | 407.735 | 336.933 | 235.494 | 318.712 | Down |
| Gm20422   | 113.786 | -0.5804 | 0.23039 | -2.5191 | 0.01177  | 0.04366  | 144.158 | 126.49  | 138.458 | 103.672 | 84.482  | 85.4591 | Down |
| Gmp       | 2006.09 | 0.39877 | 0.11997 | 3.32383 | 0.00089  | 0.00504  | 1899.21 | 1632.87 | 1659.59 | 2241.38 | 2491.16 | 2112.35 | Up   |
| Pbx4      | 329.247 | -0.597  | 0.23371 | -2.5543 | 0.01064  | 0.04025  | 454.726 | 321.017 | 413.464 | 336.933 | 229.158 | 220.183 | Down |
| Cilp2     | 134.36  | -5.336  | 0.67431 | -7.9133 | 2.51E-15 | 1.32E-13 | 146.093 | 528.001 | 112.676 | 6.2203  | 2.11205 | 11.0594 | Down |
| Yjefn3    | 117.621 | -0.9243 | 0.34344 | -2.6914 | 0.00712  | 0.02892  | 104.49  | 190.693 | 167.105 | 81.9006 | 55.9693 | 105.567 | Down |
| Tm6sf2    | 475.162 | -0.5671 | 0.27675 | -2.0493 | 0.04044  | 0.11552  | 480.848 | 584.538 | 636.907 | 418.833 | 229.158 | 500.69  | Down |
| Ncan      | 43.8276 | -2.6932 | 0.43172 | -6.2382 | 4.43E-10 | 1.04E-08 | 83.2051 | 75.7024 | 68.7516 | 10.3672 | 16.8964 | 8.04321 | Down |
| Slc25a42  | 875.542 | -0.5864 | 0.11925 | -4.9172 | 8.78E-07 | 1.10E-05 | 1135.85 | 1014.8  | 1002.63 | 656.241 | 712.817 | 730.926 | Down |
| Kxd1      | 2408.42 | -0.2221 | 0.08711 | -2.5501 | 0.01077  | 0.04068  | 2494.22 | 2688.87 | 2597.28 | 2281.81 | 2196.53 | 2191.77 | Down |
| Ell       | 2415.7  | 0.27243 | 0.09888 | 2.75519 | 0.00587  | 0.02474  | 2060.78 | 2135    | 2369.06 | 2587.64 | 2664.35 | 2677.38 | Up   |
| Isyna1    | 3692.11 | 0.57478 | 0.09077 | 6.33221 | 2.42E-10 | 6.00E-09 | 2846.39 | 3073.14 | 2979.23 | 4482.76 | 4174.47 | 4596.69 | Up   |
| Ssbp4     | 3416.51 | 0.23757 | 0.09289 | 2.55757 | 0.01054  | 0.03992  | 3170.5  | 3122.01 | 3114.83 | 3838.96 | 3834.43 | 3418.36 | Up   |
| Lrrc25    | 245.076 | 0.83946 | 0.16661 | 5.03845 | 4.69E-07 | 6.22E-06 | 169.313 | 187.819 | 169.969 | 303.758 | 338.984 | 300.615 | Up   |
| Gdf15     | 430.938 | 1.73713 | 0.40119 | 4.32996 | 1.49E-05 | 0.00014  | 302.828 | 184.944 | 108.857 | 730.885 | 909.238 | 348.874 | Up   |
| Mpv17l2   | 1463.62 | 0.3168  | 0.11593 | 2.73276 | 0.00628  | 0.02613  | 1359.34 | 1328.15 | 1223.2  | 1786.26 | 1556.58 | 1528.21 | Up   |
| Ifi30     | 4958.37 | 1.03585 | 0.15776 | 6.56602 | 5.17E-11 | 1.43E-09 | 3951.28 | 2984.02 | 2817.86 | 7139.86 | 6924.36 | 5932.87 | Up   |
| Arrdc2    | 1082.9  | -0.5355 | 0.13278 | -4.0327 | 5.51E-05 | 0.00045  | 1245.17 | 1443.14 | 1156.36 | 939.265 | 886.005 | 827.445 | Down |
| Kcnn1     | 113.92  | -1.0036 | 0.41822 | -2.3996 | 0.01641  | 0.05706  | 216.72  | 149.488 | 89.759  | 79.8271 | 103.49  | 44.2376 | Down |
| Myo9b     | 4435.12 | 0.22757 | 0.09547 | 2.38354 | 0.01715  | 0.05907  | 4270.55 | 3769.79 | 4217.72 | 4767.86 | 4955.93 | 4628.87 | Up   |
| Ushbp1    | 5801.99 | -0.3247 | 0.13919 | -2.3329 | 0.01965  | 0.0659   | 6083.65 | 5669.06 | 7603.73 | 5183.58 | 5489.22 | 4782.69 | Down |
| Ankle1    | 42.391  | 0.81563 | 0.39605 | 2.05939 | 0.03946  | 0.11331  | 24.1875 | 43.1216 | 24.827  | 53.9092 | 57.0254 | 51.2754 | Up   |
| Ano8      | 1291.46 | 0.30108 | 0.10025 | 3.00329 | 0.00267  | 0.01274  | 1125.2  | 1125.95 | 1220.34 | 1482.5  | 1399.23 | 1395.5  | Up   |
| Plvap     | 8508.16 | -0.9362 | 0.15785 | -5.9312 | 3.01E-09 | 6.08E-08 | 12136.3 | 8918.51 | 12472.7 | 6326.04 | 6024.62 | 5170.78 | Down |
| Ccdc194   | 62.1397 | 2.62941 | 0.81062 | 3.24371 | 0.00118  | 0.00641  | 22.2525 | 11.4991 | 18.1428 | 26.9546 | 29.5687 | 264.42  | Up   |
| Slc27a1   | 3010.57 | -0.3104 | 0.13253 | -2.3424 | 0.01916  | 0.06456  | 3298.21 | 3803.33 | 2898.07 | 2828.16 | 2737.22 | 2498.42 | Down |
| Colgalt1  | 5830.34 | 0.52848 | 0.11937 | 4.42735 | 9.54E-06 | 9.39E-05 | 5090.99 | 4539.27 | 4692.29 | 7338.91 | 7319.31 | 6001.24 | Up   |
| Jak3      | 3218.27 | 0.60659 | 0.11971 | 5.06736 | 4.03E-07 | 5.42E-06 | 2598.71 | 2321.86 | 2733.83 | 3530.02 | 4248.39 | 3876.83 | Up   |
| B3gnt3    | 2561.76 | 0.45774 | 0.16323 | 2.80425 | 0.00504  | 0.02188  | 2051.1  | 2144.58 | 2280.26 | 3125.7  | 3458.48 | 2310.41 | Up   |
| Gm5373    | 24.3747 | 2.56622 | 0.60309 | 4.25509 | 2.09E-05 | 0.00019  | 9.67501 | 4.79129 | 6.68418 | 32.1382 | 30.6247 | 62.3349 | Up   |
| Zfp961    | 1117.73 | -0.2541 | 0.12722 | -1.9977 | 0.04575  | 0.12722  | 1282.91 | 1204.53 | 1160.18 | 1113.43 | 1046.52 | 898.828 | Down |
| Gm45734   | 140.006 | 0.5075  | 0.25105 | 2.02156 | 0.04322  | 0.12176  | 146.093 | 93.9093 | 106.947 | 179.352 | 147.844 | 165.891 | Up   |
| Rab8a     | 4659.05 | 0.42595 | 0.09369 | 4.54613 | 5.46E-06 | 5.73E-05 | 4269.58 | 3771.71 | 3887.33 | 5405.44 | 5477.6  | 5142.63 | Up   |
| Hsh2d     | 212.828 | 0.52875 | 0.21727 | 2.43363 | 0.01495  | 0.0529   | 218.655 | 152.363 | 151.826 | 264.363 | 233.382 | 256.377 | Up   |
| Cib3      | 40.6156 | 0.71774 | 0.35747 | 2.00783 | 0.04466  | 0.12492  | 29.9925 | 29.706  | 32.466  | 54.9459 | 43.297  | 53.2862 | Up   |
| Fam32a    | 5865.57 | 0.20934 | 0.10137 | 2.06521 | 0.0389   | 0.11206  | 5632.79 | 5050.02 | 5639.54 | 6707.55 | 5875.73 | 6287.78 | Up   |
| Klf2      | 17824.6 | -0.7169 | 0.22072 | -3.2478 | 0.00116  | 0.00633  | 20699.7 | 27117.8 | 18674.6 | 16217.3 | 14926.9 | 9311.02 | Down |
| Calr3     | 153.89  | -1.0247 | 0.29238 | -3.5048 | 0.00046  | 0.00287  | 183.    |         |         |         |         |         |      |

|          |         |         |         |         |          |          |         |         |         |         |         |         |      |
|----------|---------|---------|---------|---------|----------|----------|---------|---------|---------|---------|---------|---------|------|
| Gm10649  | 23.0725 | -1.1302 | 0.48252 | -2.3422 | 0.01917  | 0.06458  | 27.09   | 31.6225 | 36.2855 | 16.5875 | 14.7844 | 12.0648 | Down |
| Arhgap10 | 756.292 | -0.7313 | 0.13479 | -5.4256 | 5.77E-08 | 9.02E-07 | 933.639 | 1039.71 | 858.44  | 547.386 | 615.663 | 542.916 | Down |
| 4933431K | 104.659 | -0.8334 | 0.36407 | -2.2892 | 0.02207  | 0.07211  | 105.458 | 193.568 | 103.127 | 60.1295 | 100.322 | 65.3511 | Down |
| Ttc29    | 1815.64 | -1.0131 | 0.22033 | -4.5979 | 4.27E-06 | 4.59E-05 | 2220.42 | 2620.84 | 2443.55 | 1133.13 | 852.212 | 1623.72 | Down |
| Lsm6     | 1736.93 | -0.255  | 0.11343 | -2.2477 | 0.02459  | 0.07865  | 1734.73 | 1901.19 | 2033.9  | 1651.49 | 1627.34 | 1472.91 | Down |
| Zfp827   | 807.852 | 0.67765 | 0.14619 | 4.63529 | 3.56E-06 | 3.90E-05 | 687.894 | 600.828 | 575.794 | 965.182 | 1123.61 | 893.801 | Up   |
| Smad1    | 2021.34 | 0.38832 | 0.09196 | 4.22257 | 2.42E-05 | 0.00022  | 1827.61 | 1661.62 | 1763.67 | 2250.71 | 2276.79 | 2347.61 | Up   |
| Tpd52-ps | 105.555 | 0.58364 | 0.22897 | 2.54901 | 0.0108   | 0.04078  | 85.1401 | 76.6607 | 91.6688 | 122.332 | 128.835 | 128.691 | Up   |
| Hhip     | 2314.42 | 0.67686 | 0.15668 | 4.32009 | 1.56E-05 | 0.00015  | 2143.98 | 1595.5  | 1604.2  | 2857.19 | 3126.89 | 2558.75 | Up   |
| Gm31105  | 116.909 | -0.7351 | 0.25981 | -2.8292 | 0.00467  | 0.02046  | 178.02  | 131.281 | 128.909 | 101.598 | 79.2019 | 82.4429 | Down |
| Inpp4b   | 1600.04 | 0.35957 | 0.12197 | 2.94796 | 0.0032   | 0.0149   | 1309.03 | 1515.97 | 1379.81 | 1775.89 | 1973.71 | 1645.84 | Up   |
| Gm9655   | 13.3007 | 1.38673 | 0.68392 | 2.02761 | 0.0426   | 0.12037  | 7.74001 | 4.79129 | 9.54883 | 26.9546 | 12.6723 | 3321.2  | Up   |
| Tbcl9    | 2122.73 | 0.73196 | 0.10393 | 7.04274 | 1.89E-12 | 6.51E-11 | 1584.77 | 1656.83 | 1545    | 2439.39 | 2680.19 | 2830.2  | Up   |
| Scoc     | 2571.5  | -0.3247 | 0.09993 | -3.2493 | 0.00116  | 0.0063   | 2783.5  | 2735.83 | 3059.44 | 2205.09 | 2415.13 | 2229.98 | Down |
| Ndufb7   | 2283.15 | -0.232  | 0.11039 | -2.1013 | 0.03562  | 0.10466  | 2316.2  | 2590.17 | 2492.24 | 2088.98 | 2278.9  | 1932.38 | Down |
| Gipc1    | 2871.93 | 0.2935  | 0.104   | 2.82207 | 0.00477  | 0.02087  | 2668.37 | 2597.84 | 2476.01 | 3295.72 | 3321.2  | 2872.43 | Up   |
| Pkn1     | 1383.77 | 0.55681 | 0.14699 | 3.78814 | 0.00015  | 0.0011   | 1259.69 | 954.426 | 1145.86 | 1508.42 | 1819.53 | 1614.67 | Up   |
| Asf1b    | 183.774 | 0.77094 | 0.22271 | 3.46157 | 0.00054  | 0.00329  | 165.443 | 134.156 | 107.902 | 234.298 | 217.541 | 243.307 | Up   |
| 1700067K | 52.038  | -1.5579 | 0.38262 | -4.0718 | 4.66E-05 | 0.00038  | 64.8226 | 81.452  | 86.8943 | 25.9179 | 17.9524 | 35.189  | Down |
| Gm10643  | 187.104 | -0.5041 | 0.21505 | -2.3442 | 0.01907  | 0.06428  | 186.728 | 264.479 | 207.21  | 145.14  | 154.18  | 164.886 | Down |
| Cc2d1a   | 1605.31 | 0.24264 | 0.08978 | 2.70254 | 0.00688  | 0.02813  | 1460.93 | 1436.43 | 1514.44 | 1748.94 | 1772.01 | 1699.13 | Up   |
| 4930432K | 35.5167 | -1.1187 | 0.40364 | -2.7714 | 0.00558  | 0.02376  | 43.5376 | 45.9964 | 56.3381 | 26.9546 | 22.1765 | 18.0972 | Down |
| Gm26532  | 941.213 | -0.514  | 0.23838 | -2.156  | 0.03108  | 0.09417  | 1297.42 | 912.262 | 1111.48 | 664.535 | 1062.36 | 599.219 | Down |
| Gm50464  | 53.2178 | -0.6824 | 0.33621 | -2.0296 | 0.0424   | 0.11993  | 59.9851 | 67.0781 | 69.7065 | 32.1382 | 40.129  | 50.27   | Down |
| Nacc1    | 4321.68 | 0.25043 | 0.097   | 2.5818  | 0.00983  | 0.03767  | 3720.04 | 4119.55 | 4002.87 | 4429.89 | 4988.66 | 4669.08 | Up   |
| Dand5    | 314.08  | -0.3723 | 0.15614 | -2.3843 | 0.01711  | 0.05901  | 358.943 | 377.554 | 326.57  | 261.252 | 296.743 | 263.415 | Down |
| Calr     | 31561.8 | 0.48497 | 0.10211 | 4.74957 | 2.04E-06 | 2.35E-05 | 25181.2 | 25352.6 | 28384.8 | 36288.2 | 39687.5 | 34476.2 | Up   |
| Gcdh     | 985.058 | -0.4066 | 0.10439 | -3.8952 | 9.81E-05 | 0.00075  | 1152.29 | 1152.79 | 1063.74 | 858.401 | 861.717 | 821.413 | Down |
| Dnase2a  | 1215.81 | 0.99363 | 0.21352 | 4.65345 | 3.26E-06 | 3.60E-05 | 1049.74 | 719.652 | 669.373 | 1690.88 | 1871.28 | 1293.95 | Up   |
| Junb     | 105358  | 0.59108 | 0.24178 | 2.44467 | 0.0145   | 0.05164  | 7827.09 | 10021.5 | 7379.33 | 13027.4 | 16829.9 | 8145.76 | Up   |
| Hook2    | 1715.95 | 0.3968  | 0.10581 | 3.75013 | 0.00018  | 0.00126  | 1552.84 | 1428.76 | 1462.88 | 2064.1  | 1798.41 | 1988.68 | Up   |
| Tnpo2    | 656.283 | 0.55148 | 0.17018 | 3.24054 | 0.00119  | 0.00646  | 588.241 | 436.008 | 572.93  | 720.518 | 740.274 | 879.726 | Up   |
| Wdr83    | 1142.49 | -0.2268 | 0.1039  | -2.1826 | 0.02906  | 0.08979  | 1258.72 | 1282.15 | 1155.41 | 1082.33 | 1052.86 | 1023.5  | Down |
| Man2b1   | 7382.97 | 0.86824 | 0.13601 | 6.3834  | 1.73E-10 | 4.44E-09 | 5983.03 | 5232.09 | 4463.12 | 9706.77 | 10154.7 | 8758.05 | Up   |
| Mylk3    | 930.744 | -4.3688 | 0.76147 | -5.7373 | 9.62E-09 | 1.75E-07 | 1088.44 | 3395.11 | 843.162 | 76.717  | 43.297  | 137.74  | Down |
| Itfg1    | 5251.21 | 0.31457 | 0.10114 | 3.11014 | 0.00187  | 0.00942  | 4953.61 | 4854.54 | 4234.91 | 5633.51 | 5833.48 | 5997.22 | Up   |
| Phkb     | 2964.01 | 0.27621 | 0.11933 | 2.3146  | 0.02063  | 0.06835  | 2667.4  | 2788.53 | 2587.73 | 3020.99 | 3026.57 | 3692.84 | Up   |
| Gm10638  | 41.4222 | -0.9561 | 0.40443 | -2.3642 | 0.01807  | 0.06165  | 39.6676 | 60.3703 | 63.9772 | 21.771  | 29.5687 | 33.1782 | Down |
| Adcy7    | 4823.6  | 0.66264 | 0.12311 | 5.38241 | 7.35E-08 | 1.12E-06 | 4193.15 | 3471.77 | 3539.75 | 5607.6  | 6505.12 | 5624.21 | Up   |
| Brd7     | 5702.62 | 0.59208 | 0.13397 | 4.41947 | 9.89E-06 | 9.70E-05 | 5226.44 | 4090.81 | 4328.48 | 6624.61 | 7580.15 | 6365.19 | Up   |
| Snx20    | 591.953 | 0.94088 | 0.18193 | 5.17162 | 2.32E-07 | 3.25E-06 | 472.141 | 389.053 | 355.216 | 725.701 | 921.91  | 687.694 | Up   |
| Cyld     | 3048.63 | 0.27486 | 0.09333 | 2.94488 | 0.00323  | 0.01501  | 2816.4  | 2705.16 | 2755.79 | 3098.74 | 3451.09 | 3464.61 | Up   |
| Tox3     | 842.953 | 0.27858 | 0.13467 | 2.0687  | 0.03857  | 0.11139  | 862.044 | 747.442 | 676.057 | 889.502 | 934.582 | 948.093 | Up   |
| Aktip    | 3424.79 | -0.3882 | 0.08338 | -4.6563 | 3.22E-06 | 3.56E-05 | 3885.49 | 3723.79 | 4039.15 | 2938.05 | 3003.34 | 2958.89 | Down |
| Fto      | 3730.44 | -0.2181 | 0.09234 | -2.3615 | 0.0182   | 0.06202  | 3891.29 | 4320.79 | 3823.35 | 3465.74 | 3450.03 | 3431.43 | Down |
| Gm36325  | 8.15446 | 6.53028 | 1.5716  | 4.15518 | 3.25E-05 | 0.00028  | 0       | 0       | 0       | 10.3672 | 7.39218 | 31.1674 | Up   |
| Irx3     | 2720.49 | 0.65226 | 0.11301 | 5.77171 | 7.85E-09 | 1.46E-07 | 2211.71 | 2135.96 | 1999.52 | 3589.11 | 3404.63 | 2982.02 | Up   |
| Irx3os   | 414.162 | 1.10357 | 0.13336 | 8.27495 | 1.29E-16 | 8.06E-15 | 254.453 | 263.521 | 271.187 | 589.891 | 544.909 | 561.014 | Up   |
| Gm36670  | 6.8726  | 3.27564 | 1.34485 | 2.43569 | 0.01486  | 0.05268  | 3.87001 | 0       | 0       | 18.6609 | 12.6723 | 6.03241 | Up   |
| Crnde    | 1117.51 | 0.40263 | 0.14428 | 2.79062 | 0.00526  | 0.0226   | 1110.69 | 854.767 | 922.417 | 1348.77 | 1157.4  | 1311.04 | Up   |
| Irx5     | 2213.29 | 0.50399 | 0.09217 | 5.4678  | 4.56E-08 | 7.28E-07 | 1839.22 | 1921.31 | 1731.2  | 2652.96 | 2589.37 | 2545.67 | Up   |
| Mmp2     | 3428.51 | 0.50178 | 0.17965 | 2.7931  | 0.00522  | 0.02248  | 2281.37 | 3228.37 | 3005.02 | 4136.5  | 3276.85 | 4642.94 | Up   |
| Lpcat2   | 1035.02 | 0.73312 | 0.20398 | 3.59399 | 0.00033  | 0.00213  | 863.011 | 883.514 | 586.298 | 1213.99 | 1110.94 | 1552.34 | Up   |
| Slc6a2   | 5167.86 | -0.4524 | 0.17553 | -2.5774 | 0.00995  | 0.03807  | 7314.31 | 5191.85 | 5408.46 | 5078.87 | 4291.69 | 3721.99 | Down |
| Ces1c    | 23.8811 | 4.14321 | 0.70576 | 5.87054 | 4.34E-09 | 8.56E-08 | 1.935   | 2.87478 | 2.86465 | 37.3218 | 36.9609 | 61.3295 | Up   |
| Ces1d    | 43534.2 | -0.5934 | 0.16783 | -3.5354 | 0.00041  | 0.00259  | 61359.9 | 50751.3 | 44976.9 | 35631.9 | 28362.7 | 40122.5 | Down |
| Ces1e    | 815.668 | -0.6702 | 0.19958 | -3.358  | 0.00078  | 0.00455  | 1012.97 | 1036.84 | 955.838 | 642.764 | 459.371 | 786.223 | Down |
| Ces1f    | 914.531 | -2.8988 | 0.78006 | -3.7161 | 0.0002   | 0.00141  | 2996.35 | 1129.79 | 712.343 | 234.298 | 87.6501 | 326.755 | Down |
| Gnao1    | 1596.89 | -0.7837 | 0.12652 | -6.1939 | 5.87E-10 | 1.34E-08 | 1783.11 | 2040.13 | 2237.29 | 1143.5  | 1248.22 | 1129.07 | Down |
| Amfr     | 12823.4 | 0.34563 | 0.09358 | 3.69339 | 0.00022  | 0.00152  | 12117   | 10909.8 | 10857   | 13960.4 | 15160.3 | 13935.9 | Up   |
| Bbs2     | 1791.08 | -0.5289 | 0.1289  | -4.1036 | 4.07E-05 | 0.00034  | 1963.06 | 2084.21 | 2300.31 | 1528.12 | 1287.29 | 1583.51 | Down |
| Mt3      | 21.4796 | -5.3493 | 1.03792 | -5.1539 | 2.55E-07 | 3.55E-06 | 39.6676 | 63.2451 | 22.9172 | 1.03672 | 0       | 2.0108  | Down |
| Gm45774  | 4.18838 | -3.4786 | 1.56684 | -2.2202 | 0.02641  | 0.08319  | 9.67501 | 3.83303 | 9.54883 | 2.07343 | 0       | 0       | Down |
| Mt1      | 2146.61 | -0.572  | 0.24182 | -2.3653 | 0.01801  | 0.06154  | 2584.2  | 2778.95 | 2336.6  | 1963.54 | 2162.74 | 1053.66 | Down |
| Ap3s1-ps | 35.2135 | 0.86469 | 0.43494 | 1.98807 | 0.0468   | 0.12953  | 27.09   | 15.3321 | 32.466  | 49.7624 | 45.4091 | 41.2214 | Up   |
| 9330175E | 112.512 | 0.67336 | 0.29129 | 2.31168 | 0.0208   | 0.06873  | 79.3351 | 100.617 | 80.2102 | 97.4513 | 162.628 | 154.832 | Up   |
| Nlrc5    | 1480.24 | 0.45684 | 0.16084 | 2.84027 | 0.00451  | 0.01989  | 1268.39 | 1352.1  | 1122.94 | 1390.24 | 1964.21 | 1783.58 | Up   |
| Cpne2    | 1205.9  | 1.05964 | 0.10761 | 9.84738 | 7.04E-23 | 7.86E-21 | 768.196 | 814.52  | 762.951 | 1620.39 | 1736.11 | 1533.24 | Up   |
| Arl2bp   | 7053.46 | -0.3859 | 0.11794 | -3.2718 | 0.00107  | 0.00589  | 6942.79 | 8221.86 | 8808.79 | 6364.4  | 6030.96 | 5951.97 | Down |
| Plip     | 306.722 | -0.5318 | 0.21053 | -2.526  | 0.01154  | 0.043    | 272.835 | 407.26  | 407.735 | 270.583 | 237.606 | 244.312 | Down |
| Ccl22    | 430.804 | 1.05897 | 0.32005 | 3.30882 | 0.00094  | 0.00528  | 317.34  | 143.739 | 377.179 | 644.837 | 625.167 | 476.56  | Up   |
| Coq9     | 2527.73 | -0.6247 | 0.2153  | -2.9016 | 0.00371  | 0.01686  | 2551.3  | 4259.46 | 2389.12 | 2027.82 | 1940.97 | 1997.73 | Down |
| Polr2c   | 2443.21 | -0.3808 | 0.08558 | -4.4493 | 8.61E-06 | 8.60E-05 | 2753.51 | 2760.74 | 2776.8  | 2149.11 | 2190.2  | 2028.9  | Down |
| Ccdc102a | 1046.87 | -0.543  | 0.13014 | -4.1727 | 3.01E-05 | 0.00026  | 1101.98 | 1256.28 | 1366.44 | 910.237 | 826.868 | 819.402 | Down |
| Adgrg1   | 8077.21 | 0.86607 | 0.11248 | 7.69983 | 1.36E-14 | 6.44E-13 | 6499.67 | 5347.08 | 5322.52 | 10387.9 | 10628.9 | 10277.2 | Up   |
| Kifc3    | 1743.13 | 0.40185 | 0.14038 | 2.8626  | 0.0042   | 0.01874  | 1676.68 | 1272.57 | 1556.46 | 1957.32 | 2145.84 | 1849.94 | Up   |
| Tepp     | 71.0547 | -1.4898 | 0.37726 | -3.9489 | 7.85E-05 | 0.00061  | 135.45  | 79.5355 |         |         |         |         |      |

|          |         |         |         |         |          |          |         |         |         |         |         |         |      |
|----------|---------|---------|---------|---------|----------|----------|---------|---------|---------|---------|---------|---------|------|
| Cdh11    | 5092.3  | -0.3424 | 0.12533 | -2.7316 | 0.0063   | 0.02621  | 4806.55 | 6076.32 | 6198.14 | 4430.92 | 4515.56 | 4526.31 | Down |
| Cdh5     | 26475.9 | -0.3799 | 0.13605 | -2.7921 | 0.00524  | 0.02253  | 28120.4 | 28347.2 | 33356.9 | 22188.8 | 26523.1 | 20319.2 | Down |
| Gm45663  | 37.4515 | -0.8354 | 0.40061 | -2.0854 | 0.03703  | 0.10796  | 44.5051 | 40.2469 | 59.2027 | 26.9546 | 31.6808 | 22.1188 | Down |
| Bean1    | 24.1495 | -1.3297 | 0.6604  | -2.0134 | 0.04407  | 0.12359  | 26.1225 | 55.579  | 21.9623 | 5.18358 | 17.9524 | 18.0972 | Down |
| Cklf     | 534.39  | 0.45435 | 0.1666  | 2.72724 | 0.00639  | 0.0265   | 527.288 | 406.302 | 419.194 | 559.827 | 687.473 | 606.257 | Up   |
| Ces2c    | 35.1256 | 3.23416 | 0.84755 | 3.81589 | 0.00014  | 0.00099  | 14.5125 | 5.74955 | 0       | 47.6889 | 105.603 | 37.1998 | Up   |
| Ces2g    | 1630.27 | -0.5974 | 0.13332 | -4.4812 | 7.42E-06 | 7.55E-05 | 2178.81 | 1798.65 | 1911.68 | 1167.34 | 1436.19 | 1288.92 | Down |
| Elmo3    | 2072.27 | 0.39774 | 0.08419 | 4.72423 | 2.31E-06 | 2.62E-05 | 1754.08 | 1839.86 | 1771.31 | 2367.86 | 2333.82 | 2366.71 | Up   |
| Lrrc29   | 329.357 | 0.47715 | 0.15866 | 3.00744 | 0.00263  | 0.01259  | 307.665 | 257.772 | 260.683 | 398.099 | 396.01  | 355.912 | Up   |
| Lrrc36   | 3427.01 | -0.6173 | 0.19725 | -3.1294 | 0.00175  | 0.00891  | 3512.03 | 4578.56 | 4357.13 | 3199.31 | 1964.21 | 2950.85 | Down |
| Tppp3    | 28798   | -0.6098 | 0.11457 | -5.3221 | 1.03E-07 | 1.52E-06 | 34279.5 | 31520   | 38584.9 | 24553.6 | 21397.2 | 22452.6 | Down |
| Zdhhc1   | 9389.61 | -0.2743 | 0.11603 | -2.364  | 0.01808  | 0.06165  | 9116.77 | 10684.6 | 11037.5 | 8840.08 | 7807.2  | 8851.55 | Down |
| Hsd11b2  | 489.59  | 3.43436 | 0.31782 | 10.8061 | 3.22E-27 | 5.56E-25 | 76.4326 | 111.158 | 61.1125 | 1049.16 | 1108.83 | 530.852 | Up   |
| Atp6v0d1 | 8804.1  | 0.76258 | 0.11165 | 6.83031 | 8.47E-12 | 2.68E-10 | 6968.91 | 6555.45 | 6065.42 | 11110.5 | 12069.3 | 10055   | Up   |
| Agrp     | 129.894 | -0.8349 | 0.27216 | -3.0677 | 0.00216  | 0.01062  | 190.598 | 141.822 | 167.105 | 103.672 | 67.5856 | 108.583 | Down |
| Pard6a   | 398.931 | -0.3356 | 0.16283 | -2.0608 | 0.03932  | 0.113    | 415.058 | 501.169 | 419.194 | 383.585 | 313.64  | 360.939 | Down |
| Enkd1    | 604.775 | -0.6045 | 0.14463 | -4.1794 | 2.92E-05 | 0.00026  | 735.301 | 690.904 | 762.951 | 501.77  | 412.906 | 524.819 | Down |
| Tsnaxip1 | 1138.51 | -0.9238 | 0.18632 | -4.9581 | 7.12E-07 | 9.12E-06 | 1377.72 | 1629.04 | 1466.7  | 825.226 | 590.318 | 942.061 | Down |
| Thap11   | 1718.82 | -0.2015 | 0.10075 | -1.9998 | 0.04552  | 0.12667  | 1913.72 | 1721.99 | 1880.16 | 1668.08 | 1597.77 | 1531.23 | Down |
| Slc12a4  | 1634.4  | 0.52371 | 0.15148 | 3.45722 | 0.00055  | 0.00334  | 1585.73 | 1162.37 | 1274.77 | 1898.23 | 2106.77 | 1778.55 | Up   |
| Gm45752  | 52.2306 | 1.19882 | 0.32988 | 3.63413 | 0.00028  | 0.00186  | 31.9275 | 32.5808 | 30.5563 | 70.4967 | 84.482  | 63.3403 | Up   |
| Esrp2    | 2954.65 | 0.35923 | 0.12558 | 2.86052 | 0.00423  | 0.01883  | 2332.65 | 2442.6  | 2990.69 | 3394.21 | 3344.43 | 3223.32 | Up   |
| Pla2g15  | 3126.23 | 1.44493 | 0.22237 | 6.49797 | 8.14E-11 | 2.18E-09 | 2143.02 | 1543.75 | 1352.11 | 4393.6  | 5783.85 | 3541.02 | Up   |
| Slc7a6   | 1828.29 | -0.3494 | 0.17063 | -2.0478 | 0.04058  | 0.11578  | 1752.15 | 2037.26 | 2356.65 | 1517.75 | 1387.62 | 1918.3  | Down |
| Smpd3    | 437.742 | 0.47348 | 0.18943 | 2.49944 | 0.01244  | 0.04568  | 398.611 | 360.305 | 340.893 | 549.459 | 397.066 | 580.116 | Up   |
| Gm10073  | 552.345 | -0.5189 | 0.1818  | -2.8541 | 0.00432  | 0.01916  | 632.746 | 593.162 | 725.711 | 491.403 | 511.116 | 359.934 | Down |
| Cdh1     | 29220.6 | 0.59747 | 0.07313 | 8.17001 | 3.08E-16 | 1.84E-14 | 22530.2 | 23792.6 | 23442.4 | 34831.6 | 34689.4 | 36037.6 | Up   |
| Has3     | 335.742 | 0.78641 | 0.3215  | 2.44609 | 0.01444  | 0.0515   | 247.68  | 264.479 | 227.262 | 447.861 | 224.933 | 602.235 | Up   |
| Cog8     | 1590.05 | 0.29091 | 0.09401 | 3.09462 | 0.00197  | 0.00985  | 1494.79 | 1380.85 | 1415.14 | 1758.27 | 1793.13 | 1698.12 | Up   |
| Tmed6    | 75.9839 | 1.32859 | 0.41415 | 3.20798 | 0.00134  | 0.00712  | 64.8226 | 38.3303 | 26.7367 | 124.406 | 73.9218 | 127.686 | Up   |
| Terf2    | 2142.84 | -0.219  | 0.08751 | -2.503  | 0.01231  | 0.04534  | 2366.51 | 2212.62 | 2336.6  | 2002.94 | 1934.64 | 2003.76 | Down |
| Cyb5b    | 17245.9 | 0.92417 | 0.09946 | 9.29183 | 1.52E-20 | 1.39E-18 | 12711   | 11556.6 | 11443.3 | 20962.4 | 24158.7 | 22643.6 | Up   |
| Nqo1     | 529.792 | -1.4506 | 0.67191 | -2.159  | 0.03085  | 0.09368  | 1508.33 | 451.34  | 367.63  | 362.851 | 209.093 | 279.501 | Down |
| Nob1     | 1261.36 | -0.4414 | 0.10953 | -4.0301 | 5.57E-05 | 0.00045  | 1406.75 | 1377.98 | 1573.65 | 1041.9  | 1116.22 | 1051.65 | Down |
| Zfp821   | 1249.01 | -0.2939 | 0.10094 | -2.9112 | 0.0036   | 0.01644  | 1339.99 | 1344.44 | 1442.83 | 1174.6  | 1099.32 | 1092.87 | Down |
| Ap1g1    | 1081.08 | 0.55867 | 0.17607 | 3.17303 | 0.00151  | 0.00788  | 972.339 | 769.482 | 881.357 | 1079.22 | 1218.65 | 1565.41 | Up   |
| Philpp2  | 1259.39 | 0.31306 | 0.15084 | 2.07544 | 0.03795  | 0.10998  | 1353.53 | 992.756 | 1023.63 | 1357.06 | 1429.86 | 1399.52 | Up   |
| Marveld3 | 1033.18 | 0.74969 | 0.12205 | 6.14259 | 8.12E-10 | 1.81E-08 | 841.726 | 750.317 | 719.982 | 1230.58 | 1263.01 | 1393.49 | Up   |
| Hydin    | 2881.32 | -0.708  | 0.25284 | -2.8001 | 0.00511  | 0.02211  | 3135.67 | 4170.34 | 3417.53 | 2239.31 | 1360.16 | 2964.93 | Down |
| Vac14    | 2217.33 | 0.46165 | 0.12392 | 3.72553 | 0.00019  | 0.00136  | 2068.52 | 1839.86 | 1688.23 | 2534.77 | 2785.79 | 2386.82 | Up   |
| Mtss2    | 2563.37 | -0.4175 | 0.14958 | -2.7913 | 0.00525  | 0.02257  | 2778.66 | 2592.09 | 3424.21 | 2043.37 | 2484.83 | 2057.05 | Down |
| Il34     | 1278.62 | 0.78134 | 0.12223 | 6.39221 | 1.64E-10 | 4.21E-09 | 1008.14 | 893.097 | 920.507 | 1492.87 | 1783.63 | 1573.45 | Up   |
| St3gal2  | 2423.74 | -0.4237 | 0.11505 | -3.6824 | 0.00023  | 0.00157  | 2574.52 | 2650.54 | 3106.23 | 2123.19 | 1970.54 | 2117.37 | Down |
| Aars     | 5454.84 | 0.36775 | 0.15788 | 2.32925 | 0.01985  | 0.06641  | 3997.72 | 4464.53 | 5827.65 | 6419.34 | 6380.51 | 5639.29 | Down |
| Clec18a  | 4.83283 | -3.691  | 1.50452 | -2.4533 | 0.01416  | 0.05073  | 7.74001 | 13.4156 | 5.7293  | 0       | 2.11205 | 0       | Down |
| Glg1     | 3945.21 | 0.39626 | 0.1303  | 3.04119 | 0.00236  | 0.01144  | 3918.38 | 3192.92 | 3109.1  | 4101.25 | 4726.77 | 4622.83 | Up   |
| Rfwd3    | 1784.05 | 0.26224 | 0.10835 | 2.42028 | 0.01551  | 0.05448  | 1724.09 | 1553.34 | 1589.88 | 1883.71 | 1846.99 | 2106.31 | Up   |
| Mkl1     | 637.257 | 0.72462 | 0.12466 | 5.81272 | 6.15E-09 | 1.16E-07 | 498.263 | 459.964 | 483.171 | 785.831 | 854.323 | 741.986 | Up   |
| Ldhd     | 941.196 | 0.76387 | 0.19649 | 3.88747 | 0.0001   | 0.00077  | 717.886 | 849.975 | 525.186 | 1322.85 | 1180.64 | 1050.64 | Up   |
| Tmem170  | 1484.6  | 0.35094 | 0.11205 | 3.132   | 0.00174  | 0.00885  | 1333.22 | 1281.19 | 1300.55 | 1754.12 | 1492.16 | 1746.38 | Up   |
| Mon1b    | 533.997 | 0.41092 | 0.1284  | 3.20046 | 0.00137  | 0.00728  | 499.231 | 442.715 | 433.517 | 602.332 | 599.822 | 626.365 | Up   |
| Vat1l    | 7.89795 | -3.3654 | 1.50565 | -2.2352 | 0.0254   | 0.08069  | 5.80501 | 33.5391 | 3.81953 | 0       | 4.2241  | 0       | Down |
| Maf      | 1476.81 | -0.2834 | 0.12791 | -2.216  | 0.02669  | 0.08388  | 1635.08 | 1794.82 | 1434.23 | 1306.26 | 1426.69 | 1263.79 | Down |
| Dynlrb2  | 3185.42 | -0.4431 | 0.17748 | -2.4966 | 0.01254  | 0.04598  | 3248.87 | 3925.99 | 3837.67 | 3043.8  | 2034.96 | 3021.23 | Down |
| Atmin    | 2267.83 | 0.29959 | 0.11356 | 2.63803 | 0.00834  | 0.03291  | 2214.61 | 1798.65 | 2086.42 | 2495.38 | 2474.27 | 2537.63 | Up   |
| Pkd1l2   | 43.3072 | -0.915  | 0.42297 | -2.1634 | 0.03051  | 0.09292  | 36.7651 | 68.9946 | 63.9772 | 26.9546 | 38.0169 | 25.135  | Down |
| Cmp1     | 1674.54 | 0.32373 | 0.15029 | 2.15406 | 0.03124  | 0.09449  | 1613.79 | 1447.93 | 1400.81 | 1571.66 | 1835.37 | 2177.7  | Up   |
| Plcg2    | 1418.76 | 0.98601 | 0.21753 | 4.5327  | 5.82E-06 | 6.06E-05 | 1190.99 | 964.966 | 699.929 | 1656.67 | 2296.86 | 1703.15 | Up   |
| Sdr42e1  | 391.143 | 0.36053 | 0.16603 | 2.17151 | 0.02989  | 0.09161  | 366.683 | 340.182 | 320.841 | 383.585 | 430.858 | 504.711 | Up   |
| Hsd17b2  | 87.5501 | 0.92249 | 0.32476 | 2.84055 | 0.0045   | 0.01988  | 54.1801 | 81.452  | 45.8344 | 101.598 | 103.479 | 138.745 | Up   |
| Mphosph  | 1512.53 | 0.31966 | 0.11358 | 2.81449 | 0.00489  | 0.02129  | 1284.84 | 1330.06 | 1421.82 | 1619.35 | 1840.65 | 1578.48 | Up   |
| Cdh13    | 1998.8  | -0.7227 | 0.23693 | -3.0502 | 0.00229  | 0.01116  | 2474.87 | 2810.57 | 2181.91 | 1710.58 | 1860.72 | 954.125 | Down |
| Necab2   | 48.9522 | -1.7812 | 0.3686  | -4.8324 | 1.35E-06 | 1.61E-05 | 64.8226 | 86.2433 | 76.3906 | 19.6976 | 27.4567 | 19.1026 | Down |
| Dnaaf1   | 949.999 | -0.9802 | 0.22131 | -4.4292 | 9.46E-06 | 9.33E-05 | 1118.43 | 1419.18 | 1245.17 | 741.252 | 432.97  | 742.991 | Down |
| Gm32352  | 24.7526 | -1.525  | 0.70032 | -2.1776 | 0.02944  | 0.0906   | 11.61   | 65.1616 | 33.4209 | 10.3672 | 16.8964 | 11.0594 | Down |
| Wfdc1    | 1912.1  | -0.4997 | 0.17409 | -2.8707 | 0.0041   | 0.01834  | 1766.66 | 2485.72 | 2467.42 | 1701.25 | 1702.31 | 1349.25 | Down |
| Atp2c2   | 1363.45 | -0.6317 | 0.29802 | -2.1196 | 0.03404  | 0.10101  | 1352.57 | 2008.51 | 1610.89 | 1111.36 | 589.262 | 1508.1  | Down |
| Cotl1    | 3295.65 | 1.02382 | 0.17842 | 5.73809 | 9.58E-09 | 1.75E-07 | 2542.59 | 2224.12 | 1752.21 | 4121.98 | 5263.23 | 3869.79 | Up   |
| Galnt2l  | 3403.8  | -0.4834 | 0.13557 | -3.5654 | 0.00036  | 0.00235  | 3596.2  | 4013.19 | 4296.97 | 2446.65 | 2897.73 | 3172.04 | Down |
| Ttc13    | 2486.36 | 0.22326 | 0.10883 | 2.05141 | 0.04023  | 0.11503  | 2453.58 | 2175.25 | 2254.48 | 2527.51 | 2595.71 | 2911.64 | Up   |
| Fam89a   | 385.642 | -0.6609 | 0.19159 | -3.4494 | 0.00056  | 0.00342  | 405.383 | 520.334 | 491.765 | 249.849 | 294.631 | 351.89  | Down |
| Trim67   | 19.561  | -2.3215 | 0.93406 | -2.4854 | 0.01294  | 0.04718  | 10.6425 | 77.619  | 9.54883 | 8.29373 | 4.2241  | 7.03781 | Down |
| Gnpat    | 7619.15 | 0.32607 | 0.11509 | 2.83307 | 0.00461  | 0.02026  | 6810.24 | 7532.87 | 5942.24 | 8231.52 | 8654.13 | 8543.9  | Up   |
| Exoc8    | 1546.7  | 0.27752 | 0.10046 | 2.76247 | 0.00574  | 0.0243   | 1432.87 | 1337.73 | 1424.69 | 1595.51 | 1712.87 | 1776.54 | Up   |
| Sipa1l2  | 3190.93 | -0.3976 | 0.10744 | -3.7003 | 0.00022  | 0.00148  | 3384.32 | 3605.93 | 3893.06 | 2605.27 | 2970.6  | 2686.43 | Down |
| 4930567H | 75.1397 | -1.326  | 0.37677 | -3.5194 | 0.00043  | 0.00273  | 84.1726 | 122.657 | 115.541 | 53.9092 | 24.2886 | 50.27   | Down |
| Ntpcr    | 907.328 | 0.57013 | 0.13696 | 4.16289 | 3.14E-05 | 0.00027  | 808.831 | 730.    |         |         |         |         |      |

|          |         |         |         |         |          |          |         |         |         |         |         |         |      |
|----------|---------|---------|---------|---------|----------|----------|---------|---------|---------|---------|---------|---------|------|
| Gm32856  | 305.657 | 1.07098 | 0.16854 | 6.3545  | 2.09E-10 | 5.28E-09 | 205.11  | 173.445 | 212.939 | 390.842 | 399.178 | 452.43  | Up   |
| Alkbh8   | 916.25  | -0.2532 | 0.11225 | -2.2556 | 0.0241   | 0.07734  | 959.761 | 986.048 | 1043.69 | 821.079 | 794.131 | 892.796 | Down |
| Gucyl2a2 | 219.71  | -1.0838 | 0.18608 | -5.8245 | 5.73E-09 | 1.09E-07 | 269.933 | 334.432 | 291.239 | 140.993 | 149.956 | 131.708 | Down |
| Kbtbd3   | 572.345 | -0.3903 | 0.12566 | -3.1059 | 0.0019   | 0.00954  | 631.778 | 624.785 | 691.335 | 523.542 | 470.987 | 491.641 | Down |
| Casp1    | 1152.71 | 1.00498 | 0.15253 | 6.58862 | 4.44E-11 | 1.24E-09 | 878.491 | 780.023 | 641.681 | 1683.63 | 1440.42 | 1492.01 | Up   |
| Casp4    | 1802.57 | 0.76655 | 0.11108 | 6.90068 | 5.18E-12 | 1.67E-10 | 1343.86 | 1349.23 | 1311.05 | 2151.19 | 2140.56 | 2519.53 | Up   |
| Dync2h1  | 1949.96 | -0.5953 | 0.17307 | -3.4395 | 0.00058  | 0.00353  | 2412.95 | 2413.85 | 2213.42 | 1642.16 | 1178.52 | 1838.88 | Down |
| Mmp13    | 206.621 | 3.23247 | 0.48003 | 6.73392 | 1.65E-11 | 5.01E-10 | 54.1801 | 30.6643 | 34.3758 | 447.861 | 545.965 | 126.681 | Up   |
| Mmp12    | 1120.63 | 3.39573 | 0.19003 | 17.8698 | 2.03E-71 | 7.29E-68 | 252.518 | 178.236 | 152.781 | 2167.77 | 1890.29 | 2082.19 | Up   |
| Mmp3     | 1120.19 | -1.0341 | 0.31037 | -3.3317 | 0.00086  | 0.00492  | 1624.43 | 1308.02 | 1583.2  | 795.161 | 1043.35 | 366.971 | Down |
| Mmp8     | 512.009 | 2.72184 | 0.39477 | 6.89476 | 5.40E-12 | 1.74E-10 | 224.46  | 126.49  | 53.4734 | 996.284 | 951.479 | 719.867 | Up   |
| Tmem123  | 15766.1 | 0.31465 | 0.08718 | 3.60906 | 0.00031  | 0.00203  | 14506.7 | 13202.9 | 14451.2 | 16691.1 | 17901.7 | 17842.8 | Up   |
| Birc3    | 4170.62 | 0.94679 | 0.09434 | 10.0359 | 1.06E-23 | 1.27E-21 | 2823.17 | 2988.81 | 2735.74 | 5215.72 | 5427.97 | 5832.33 | Up   |
| Yap1     | 7116.75 | -0.2654 | 0.07829 | -3.3903 | 0.0007   | 0.00412  | 7783.55 | 7524.25 | 8000.96 | 6298.05 | 6635.01 | 6458.7  | Down |
| Cfap300  | 882.666 | -0.8182 | 0.24786 | -3.3012 | 0.00096  | 0.00541  | 1104.89 | 1155.66 | 1119.12 | 670.755 | 396.01  | 849.564 | Down |
| Gm19324  | 52.0058 | 1.91983 | 0.39321 | 4.88248 | 1.05E-06 | 1.29E-05 | 15.48   | 18.2069 | 31.5111 | 72.5701 | 90.8182 | 83.4483 | Up   |
| 1700128F | 3.45015 | 5.28747 | 1.74675 | 3.02704 | 0.00247  | 0.01192  | 0       | 0       | 0       | 6.2203  | 8.4482  | 6.03241 | Up   |
| Gm32014  | 484.773 | -0.3042 | 0.15137 | -2.0093 | 0.0445   | 0.12451  | 526.321 | 485.837 | 594.892 | 390.842 | 458.315 | 452.43  | Down |
| Gm16485  | 74.7843 | -0.8715 | 0.31978 | -2.7253 | 0.00642  | 0.02662  | 114.165 | 100.617 | 75.4357 | 45.6155 | 47.5211 | 65.3511 | Down |
| Arhgap42 | 1948.6  | -0.5558 | 0.13875 | -4.0056 | 6.19E-05 | 0.0005   | 2010.47 | 2308.45 | 2639.3  | 1470.06 | 1548.13 | 1715.21 | Down |
| Sesn3    | 2214.14 | 0.27836 | 0.10481 | 2.65588 | 0.00791  | 0.03152  | 1961.13 | 2082.3  | 1960.37 | 2311.88 | 2316.92 | 2652.25 | Up   |
| Amotl1   | 3723.02 | -0.2341 | 0.0961  | -2.4361 | 0.01485  | 0.05264  | 3794.54 | 4024.69 | 4254    | 3233.52 | 3556.69 | 3474.67 | Down |
| Piwil4   | 733.372 | 1.71611 | 0.19804 | 8.66557 | 4.49E-18 | 3.39E-16 | 378.293 | 341.14  | 307.472 | 1128.98 | 865.941 | 1378.4  | Up   |
| Fut4     | 1099.97 | 1.61392 | 0.21905 | 7.36771 | 1.74E-13 | 7.08E-12 | 684.991 | 496.378 | 444.021 | 1737.54 | 1269.34 | 1967.57 | Up   |
| 1700012B | 177.947 | -3.4661 | 0.30867 | -11.229 | 2.93E-29 | 5.50E-27 | 234.135 | 340.182 | 404.87  | 26.9546 | 25.3446 | 36.1944 | Down |
| Izumo1r  | 38.678  | -1.0592 | 0.48839 | -2.1687 | 0.03011  | 0.09204  | 81.2701 | 39.2886 | 36.2855 | 18.6609 | 26.4006 | 30.162  | Down |
| Panx1    | 494.13  | 0.32212 | 0.15777 | 2.04171 | 0.04118  | 0.1172   | 475.043 | 420.676 | 422.058 | 547.386 | 476.267 | 623.349 | Up   |
| Heph11   | 5.4363  | -4.8323 | 2.11495 | -2.2848 | 0.02232  | 0.07272  | 0       | 28.7478 | 2.86465 | 0       | 0       | 1.0054  | Down |
| Smco4    | 1355.6  | -0.3972 | 0.1213  | -3.2745 | 0.00106  | 0.00584  | 1587.67 | 1548.55 | 1486.75 | 1310.41 | 1140.51 | 1059.69 | Down |
| Slc36a4  | 2544.42 | 0.31938 | 0.09558 | 3.34134 | 0.00083  | 0.00477  | 2368.44 | 2262.45 | 2160.9  | 2673.69 | 2954.76 | 2846.29 | Up   |
| Fat3     | 1004.4  | -0.8813 | 0.16997 | -5.1851 | 2.16E-07 | 3.03E-06 | 1036.19 | 1477.63 | 1392.22 | 713.261 | 639.951 | 767.121 | Down |
| Gm48069  | 30.7328 | -1.1731 | 0.45574 | -2.5741 | 0.01005  | 0.03836  | 52.2451 | 30.6643 | 44.8795 | 16.5875 | 16.8964 | 23.1242 | Down |
| Fbxl12os | 198.158 | -0.546  | 0.22344 | -2.4436 | 0.01454  | 0.05177  | 237.038 | 193.568 | 275.006 | 187.646 | 148.9   | 146.789 | Down |
| Rdh8     | 2.39334 | 4.76113 | 2.10286 | 2.26413 | 0.02357  | 0.07603  | 0       | 0       | 0       | 1.03672 | 5.28013 | 8.04321 | Up   |
| Shfl     | 1771.9  | 0.31514 | 0.11423 | 2.75873 | 0.0058   | 0.02454  | 1613.79 | 1423.01 | 1700.65 | 1854.68 | 2004.34 | 2034.93 | Up   |
| Ppan     | 968.977 | -0.347  | 0.13336 | -2.602  | 0.00927  | 0.03589  | 1073.93 | 1008.09 | 1172.6  | 880.172 | 924.022 | 755.056 | Down |
| Eif3g    | 4283.57 | -0.2316 | 0.10067 | -2.3008 | 0.0214   | 0.0703   | 4642.07 | 4428.11 | 4809.75 | 4249.5  | 3928.41 | 3643.57 | Down |
| S1pr2    | 3197.14 | 0.70554 | 0.17866 | 3.94904 | 7.85E-05 | 0.00061  | 2931.53 | 1949.1  | 2411.08 | 3840    | 4590.54 | 3460.59 | Up   |
| Mrpl4    | 2964.4  | -0.3138 | 0.13192 | -2.3786 | 0.01738  | 0.05967  | 3089.23 | 3463.15 | 3303.89 | 2889.33 | 2804.8  | 2236.01 | Down |
| Icam1    | 29894.6 | 1.30685 | 0.12784 | 10.2223 | 1.58E-24 | 2.02E-22 | 19763.2 | 14645.1 | 17223.2 | 42533.3 | 43484   | 41719.1 | Up   |
| Icam5    | 19.9436 | 1.92217 | 0.58321 | 3.29586 | 0.00098  | 0.00549  | 11.61   | 7.66607 | 5.7293  | 36.2851 | 22.1765 | 36.1944 | Up   |
| Tyk2     | 22.8205 | 0.97901 | 0.46849 | 2.08972 | 0.03664  | 0.10711  | 15.48   | 13.4156 | 17.1879 | 27.9913 | 31.6808 | 31.1674 | Up   |
| Pde4a    | 1099.68 | -0.4637 | 0.11957 | -3.8782 | 0.00011  | 0.00079  | 1394.17 | 1170.99 | 1259.49 | 897.796 | 976.823 | 898.828 | Down |
| Ap1m2    | 2644.61 | 0.36808 | 0.0936  | 3.93248 | 8.41E-05 | 0.00065  | 2196.23 | 2284.49 | 2446.41 | 3094.6  | 2905.13 | 2940.8  | Up   |
| Slc44a2  | 20560.9 | 0.39726 | 0.12177 | 3.26228 | 0.00111  | 0.00607  | 19043.3 | 16474.4 | 17725.5 | 23502.3 | 26032.1 | 20587.6 | Up   |
| Gm16853  | 29.6013 | -1.5964 | 0.52146 | -3.0614 | 0.0022   | 0.0108   | 49.3426 | 50.7877 | 33.4209 | 15.5507 | 7.39218 | 21.1134 | Down |
| Qtrt1    | 619.293 | -0.2701 | 0.11989 | -2.253  | 0.02426  | 0.07773  | 653.063 | 666.948 | 711.388 | 553.606 | 538.573 | 592.181 | Down |
| Dnm2     | 10084.9 | 0.44784 | 0.09385 | 4.77172 | 1.83E-06 | 2.13E-05 | 8829.42 | 8380.93 | 8385.78 | 11435   | 12569.9 | 10908.6 | Up   |
| Tmed1    | 854.497 | -0.3005 | 0.11899 | -2.5257 | 0.01155  | 0.04302  | 915.256 | 951.551 | 962.522 | 808.638 | 797.299 | 691.716 | Down |
| Smarca4  | 6462.7  | 0.32028 | 0.07755 | 4.12991 | 3.63E-05 | 0.00031  | 5751.8  | 5665.23 | 5827.65 | 6975.02 | 7452.37 | 7104.16 | Up   |
| Ldlr     | 6537.05 | 1.50552 | 0.12701 | 11.8539 | 2.05E-32 | 4.81E-30 | 3641.68 | 3514.89 | 3059.44 | 9304.52 | 10904.5 | 8797.26 | Up   |
| Dock6    | 6909.58 | -0.3331 | 0.10288 | -3.2383 | 0.0012   | 0.00651  | 7266.9  | 7345.05 | 8499.41 | 9594.9  | 6368.89 | 6022.35 | Down |
| Tmem205  | 3175.25 | -0.3543 | 0.10763 | -3.292  | 0.00099  | 0.00556  | 3892.26 | 3403.73 | 3393.65 | 2977.45 | 2716.1  | 2668.33 | Down |
| Plppr2   | 633.707 | -0.4351 | 0.15651 | -2.7797 | 0.00544  | 0.02326  | 851.401 | 621.91  | 712.343 | 556.716 | 528.013 | 531.857 | Down |
| Rgl3     | 1530.52 | 0.20665 | 0.09092 | 2.27289 | 0.02303  | 0.07463  | 1436.74 | 1367.44 | 1459.06 | 1643.19 | 1659.02 | 1617.69 | Up   |
| Ccdc151  | 1076.87 | -0.6299 | 0.21171 | -2.9754 | 0.00293  | 0.01377  | 1114.56 | 1419.18 | 1391.26 | 1051.23 | 608.271 | 876.71  | Down |
| Prkcsb   | 5173.01 | 0.24779 | 0.08535 | 2.90305 | 0.0037   | 0.0168   | 4763.01 | 4553.65 | 4872.77 | 5797.32 | 5703.59 | 5347.73 | Up   |
| Elavl3   | 3.51332 | -5.2096 | 1.89503 | -2.7491 | 0.00598  | 0.02508  | 1.935   | 13.4156 | 5.7293  | 0       | 0       | 0       | Down |
| Cnn1     | 1782.05 | -2.4113 | 0.33687 | -7.1579 | 8.19E-13 | 2.97E-11 | 1609.92 | 4446.32 | 2943.9  | 628.25  | 695.921 | 367.977 | Down |
| Elof1    | 7948.49 | -0.4902 | 0.14058 | -3.4872 | 0.00049  | 0.00304  | 9093.55 | 9900.73 | 8864.18 | 7205.18 | 5400.51 | 7226.82 | Down |
| Pigyl    | 1369.83 | 0.35132 | 0.13807 | 2.54452 | 0.01094  | 0.04117  | 1241.3  | 1116.37 | 1253.76 | 1737.54 | 1542.85 | 1327.13 | Up   |
| Gm18227  | 13.8013 | 1.6392  | 0.70009 | 2.34143 | 0.01921  | 0.06467  | 2.9025  | 9.58259 | 7.63906 | 19.6976 | 15.8404 | 27.1458 | Up   |
| Zfp872   | 210.998 | 1.28808 | 0.22796 | 5.65052 | 1.60E-08 | 2.78E-07 | 119.003 | 122.657 | 126.045 | 305.831 | 362.217 | 230.237 | Up   |
| 1810064F | 894.007 | 1.28368 | 0.13902 | 9.23408 | 2.61E-20 | 2.36E-18 | 565.021 | 483.921 | 512.772 | 1376.76 | 1311.58 | 1113.98 | Up   |
| Zfp809   | 6019.89 | 0.67373 | 0.12924 | 5.21314 | 1.86E-07 | 2.65E-06 | 4617.88 | 4495.19 | 4804.97 | 7198.95 | 6433.31 | 8569.03 | Up   |
| Zfp810   | 1179.91 | 0.21771 | 0.0998  | 2.18138 | 0.02916  | 0.08996  | 1075.86 | 1141.29 | 1056.1  | 1249.24 | 1241.89 | 1315.06 | Up   |
| Bmper    | 1246.67 | -0.6896 | 0.18615 | -3.7047 | 0.00021  | 0.00146  | 1153.26 | 1773.74 | 1690.14 | 896.759 | 1060.25 | 905.866 | Down |
| Tbx20    | 340.37  | -5.8168 | 1.40052 | -4.1533 | 3.28E-05 | 0.00028  | 342.496 | 1298.44 | 365.72  | 12.4406 | 0       | 23.1242 | Down |
| B3gat1   | 11.3568 | -2.0213 | 0.77214 | -2.6177 | 0.00885  | 0.03452  | 10.6425 | 21.0817 | 22.9172 | 4.14686 | 6.33615 | 3.0162  | Down |
| Glb1l2   | 2425.48 | -0.7145 | 0.21706 | -3.2917 | 0.001    | 0.00556  | 2425.53 | 3684.5  | 2932.45 | 2141.85 | 1330.59 | 2037.95 | Down |
| Glb1l3   | 162.54  | -0.5942 | 0.19739 | -3.0101 | 0.00261  | 0.01251  | 204.143 | 186.86  | 195.751 | 128.553 | 116.163 | 143.772 | Down |
| Vps26b   | 2274.1  | 0.23109 | 0.09287 | 2.48825 | 0.01284  | 0.04688  | 2179.78 | 2123.5  | 1973.74 | 2498.49 | 2494.33 | 2374.76 | Up   |
| Jam3     | 828.133 | -1.083  | 0.16302 | -6.6432 | 3.07E-11 | 8.85E-10 | 1040.06 | 1327.19 | 1008.36 | 534.945 | 473.099 | 585.143 | Down |
| Snx19    | 3330.55 | 0.26716 | 0.08457 | 3.15919 | 0.00158  | 0.00819  | 3123.09 | 3001.27 | 2944.86 | 3495.81 | 3700.31 | 3717.97 | Up   |
| Gm31013  | 6.89067 | -5.1828 | 1.63888 | -3.1624 | 0.00156  | 0.00811  | 7.74001 | 28.7478 | 3.81953 | 1.03672 | 0       | 0       | Down |
| Adamts15 | 3495.72 | -0.7425 | 0.26638 | -2.7873 | 0.00531  | 0.0228   | 2460.36 | 5505.2  | 5162.1  | 2525.44 | 2991.72 | 2329.51 | Down |
| Zbtb44   | 2880.15 | -0.2329 | 0.09569 | -2.4343 | 0.01492  | 0.05284  | 3146.31 | 2943.77 | 3246.6  | 2540.99 | 2605.21 | 2798.03 |      |

|          |         |         |         |         |          |          |         |         |         |         |         |         |      |
|----------|---------|---------|---------|---------|----------|----------|---------|---------|---------|---------|---------|---------|------|
| St3gal4  | 3689.43 | 0.40991 | 0.09886 | 4.14656 | 3.38E-05 | 0.00029  | 3121.16 | 3291.62 | 3093.82 | 4022.46 | 4032.96 | 4574.57 | Up   |
| Tirap    | 1226.47 | 0.42332 | 0.12673 | 3.34023 | 0.00084  | 0.00479  | 1135.85 | 976.466 | 1031.27 | 1268.94 | 1415.07 | 1531.23 | Up   |
| Srpr     | 8859.89 | 0.2762  | 0.09321 | 2.96308 | 0.00305  | 0.01428  | 8290.52 | 7776.27 | 7976.14 | 10097.6 | 10079.8 | 8939.02 | Up   |
| Stt3a    | 9371.63 | 0.27778 | 0.07246 | 3.83345 | 0.00013  | 0.00093  | 8664.94 | 8461.42 | 8290.29 | 10227.2 | 10157.9 | 10428   | Up   |
| Ei24     | 1860.4  | 0.39684 | 0.14469 | 2.74273 | 0.00609  | 0.02548  | 1875.02 | 1499.67 | 1443.78 | 1895.12 | 2241.94 | 2206.85 | Up   |
| Fez1     | 62.4548 | -1.0099 | 0.40326 | -2.5044 | 0.01227  | 0.0452   | 64.8226 | 114.991 | 70.6613 | 42.5053 | 27.4567 | 54.2916 | Down |
| Tmem218  | 567.864 | -0.4613 | 0.15332 | -3.0088 | 0.00262  | 0.01255  | 691.764 | 706.237 | 575.794 | 514.211 | 424.522 | 494.657 | Down |
| Slc37a2  | 508.107 | 1.11648 | 0.31926 | 3.49705 | 0.00047  | 0.00294  | 405.383 | 307.601 | 249.224 | 625.14  | 1037.02 | 424.279 | Up   |
| Hepacam  | 189.204 | -0.8089 | 0.23878 | -3.3876 | 0.00071  | 0.00415  | 303.795 | 208.9   | 210.074 | 151.361 | 119.331 | 141.762 | Down |
| Robo4    | 3647.55 | -0.5148 | 0.14998 | -3.4324 | 0.0006   | 0.00361  | 4130.26 | 3841.66 | 4902.37 | 2716.2  | 3501.78 | 2793    | Down |
| Robo3    | 15.3526 | -1.3591 | 0.60819 | -2.2347 | 0.02544  | 0.08078  | 23.22   | 22.0399 | 21.0074 | 5.18358 | 11.6163 | 9.04861 | Down |
| Msantd2  | 2593.23 | -0.5497 | 0.12962 | -4.2412 | 2.22E-05 | 0.0002   | 2747.7  | 3176.63 | 3320.13 | 2063.06 | 1909.29 | 2342.58 | Down |
| Esam     | 13332.3 | -0.2929 | 0.13138 | -2.2297 | 0.02577  | 0.08156  | 13465.7 | 13436.7 | 17141.1 | 11740.8 | 12883.5 | 11325.8 | Down |
| Vsig2    | 2203.8  | 0.43908 | 0.13639 | 3.21927 | 0.00129  | 0.00689  | 1878.89 | 1718.16 | 2015.76 | 2560.69 | 2856.55 | 2192.78 | Up   |
| Nrgn     | 1144.21 | -1.2348 | 0.21682 | -5.6949 | 1.23E-08 | 2.19E-07 | 1115.53 | 1711.45 | 1990.93 | 665.572 | 762.45  | 619.327 | Down |
| Vwa5a    | 6505.29 | 0.44671 | 0.08798 | 5.07726 | 3.83E-07 | 5.16E-06 | 5889.18 | 5270.42 | 5358.8  | 7353.43 | 7643.51 | 7516.38 | Up   |
| Olfr920  | 303.091 | 0.34697 | 0.17435 | 1.99005 | 0.04659  | 0.12911  | 234.135 | 298.018 | 268.322 | 305.831 | 344.264 | 367.977 | Up   |
| Scn3b    | 3684.35 | 0.4962  | 0.16517 | 3.00411 | 0.00266  | 0.01271  | 3721.01 | 2835.49 | 2614.47 | 3901.16 | 4140.68 | 4893.29 | Up   |
| Ubash3b  | 573.687 | 0.54632 | 0.13335 | 4.09681 | 4.19E-05 | 0.00035  | 457.628 | 492.545 | 448.795 | 625.14  | 742.386 | 675.629 | Up   |
| Mir100hg | 32.213  | -1.7849 | 0.52384 | -3.4073 | 0.00066  | 0.00391  | 42.5701 | 70.9111 | 36.2855 | 20.7343 | 13.7283 | 9.04861 | Down |
| Sc5d     | 4546.85 | 0.60549 | 0.1154  | 5.24705 | 1.55E-07 | 2.22E-06 | 3432.7  | 3978.69 | 3407.98 | 5008.37 | 5848.27 | 5605.11 | Up   |
| Grik4    | 83.2255 | 1.24878 | 0.34119 | 3.66009 | 0.00025  | 0.0017   | 45.4726 | 54.6207 | 47.7441 | 92.2677 | 164.74  | 94.5077 | Up   |
| Arhgef12 | 9948.18 | -0.3714 | 0.10922 | -3.4005 | 0.00067  | 0.00399  | 10633.8 | 10607   | 12424   | 8391.18 | 9299.36 | 8333.77 | Down |
| D630033C | 4.95901 | 2.75688 | 1.28856 | 2.13951 | 0.03239  | 0.0971   | 0       | 1.91652 | 1.90977 | 14.514  | 7.39218 | 4.0216  | Up   |
| Trim29   | 1012.1  | 2.51262 | 0.24477 | 10.2654 | 1.01E-24 | 1.31E-22 | 375.391 | 311.434 | 218.668 | 1633.86 | 2208.15 | 1325.12 | Up   |
| Nectin1  | 2445.37 | 0.95589 | 0.14699 | 6.50328 | 7.86E-11 | 2.11E-09 | 1500.59 | 1633.83 | 1856.29 | 3215.89 | 3688.7  | 2776.92 | Up   |
| Thy1     | 882.862 | -0.4601 | 0.15456 | -2.9765 | 0.00292  | 0.01373  | 939.444 | 993.714 | 1134.4  | 732.958 | 642.063 | 854.591 | Down |
| Gm10687  | 486.156 | -0.7728 | 0.26992 | -2.8632 | 0.00419  | 0.01871  | 391.838 | 686.113 | 761.997 | 288.207 | 430.858 | 357.923 | Down |
| Mcam     | 11670.7 | -0.4176 | 0.19431 | -2.1489 | 0.03164  | 0.09546  | 10034.9 | 12741   | 17268.1 | 8876.36 | 10585.6 | 10518.5 | Down |
| Cbl      | 3385.92 | 0.24743 | 0.09726 | 2.54402 | 0.01096  | 0.0412   | 3203.4  | 2942.81 | 3142.52 | 3489.59 | 3936.86 | 3600.34 | Up   |
| Ccdc153  | 9076.93 | -0.6577 | 0.20013 | -3.2862 | 0.00102  | 0.00565  | 9930.44 | 12086.5 | 11315.4 | 7918.44 | 4884.12 | 8326.73 | Down |
| Nlr1x1   | 769.571 | 0.8261  | 0.19291 | 4.28232 | 1.85E-05 | 0.00017  | 543.736 | 629.576 | 491.765 | 886.392 | 1234.49 | 831.467 | Up   |
| Hinfp    | 980.257 | 0.3937  | 0.12137 | 3.24377 | 0.00118  | 0.00641  | 905.581 | 794.396 | 842.207 | 1109.29 | 1029.62 | 1200.45 | Up   |
| C2cd2l   | 3092.8  | 0.63612 | 0.08985 | 7.07981 | 1.44E-12 | 5.08E-11 | 2539.69 | 2428.23 | 2297.45 | 3874.21 | 3761.56 | 3655.64 | Up   |
| Dpagt1   | 1307.46 | 0.22608 | 0.11205 | 2.0177  | 0.04362  | 0.12266  | 1200.67 | 1100.08 | 1314.87 | 1418.23 | 1422.47 | 1388.46 | Up   |
| Hmbs     | 1408.52 | 0.55649 | 0.097   | 5.73695 | 9.64E-09 | 1.76E-07 | 1155.2  | 1165.24 | 1100.03 | 1691.92 | 1737.16 | 1601.6  | Up   |
| Hyou1    | 7299.51 | 0.40162 | 0.12994 | 3.09072 | 0.002    | 0.00996  | 5602.8  | 5948.87 | 7318.22 | 8830.75 | 8136.68 | 7959.76 | Up   |
| Upk2     | 64.5399 | -0.8887 | 0.35616 | -2.4952 | 0.01259  | 0.04615  | 73.5301 | 107.325 | 70.6613 | 47.6889 | 32.7368 | 55.297  | Down |
| Phldb1   | 3257.25 | -0.3753 | 0.10201 | -3.6785 | 0.00023  | 0.00159  | 3655.22 | 3478.48 | 3901.65 | 2699.61 | 3048.75 | 2759.83 | Down |
| Arcn1    | 11780.7 | 0.23081 | 0.07177 | 3.2158  | 0.0013   | 0.00697  | 11012.1 | 10629   | 10879.9 | 12999.4 | 12556.1 | 12607.7 | Up   |
| Kmt2a    | 4086.7  | -0.2127 | 0.09811 | -2.1679 | 0.03016  | 0.09217  | 4476.63 | 4138.72 | 4547.15 | 3696.93 | 3598.93 | 4061.82 | Down |
| Cd3d     | 260.078 | -0.4367 | 0.16575 | -2.6345 | 0.00843  | 0.03317  | 279.608 | 295.144 | 322.75  | 220.82  | 204.869 | 237.275 | Down |
| Mpzl3    | 545.369 | 0.73406 | 0.1504  | 4.88063 | 1.06E-06 | 1.30E-05 | 471.173 | 355.514 | 402.006 | 664.535 | 683.248 | 695.737 | Up   |
| Jaml     | 179.101 | 0.5331  | 0.22551 | 2.36399 | 0.01808  | 0.06165  | 179.955 | 119.782 | 139.413 | 227.041 | 214.373 | 194.042 | Up   |
| Scn4b    | 203.838 | -4.9724 | 1.03871 | -4.7871 | 1.69E-06 | 1.99E-05 | 249.615 | 789.605 | 146.097 | 13.4773 | 2.11205 | 22.1188 | Down |
| Gm39327  | 22.5952 | 1.76911 | 0.67092 | 2.63683 | 0.00837  | 0.033    | 9.67501 | 17.2487 | 3.81953 | 24.8812 | 52.8013 | 27.1458 | Up   |
| Tmprss4  | 1363.3  | 1.93034 | 0.16667 | 11.5819 | 5.09E-31 | 1.10E-28 | 709.179 | 494.461 | 496.539 | 2056.84 | 2223.99 | 2198.81 | Up   |
| Il10ra   | 1230    | 0.48746 | 0.16329 | 2.98515 | 0.00283  | 0.01341  | 1252.91 | 974.549 | 845.071 | 1406.82 | 1468.93 | 1431.69 | Up   |
| Tmprss13 | 164.781 | -1.0815 | 0.4487  | -2.4102 | 0.01594  | 0.05577  | 145.125 | 334.432 | 191.931 | 144.104 | 45.4091 | 127.686 | Down |
| Fxyd6    | 1300.69 | -0.5283 | 0.21154 | -2.4974 | 0.01251  | 0.04589  | 1791.81 | 1548.55 | 1268.08 | 952.742 | 1382.34 | 860.623 | Down |
| 4833428L | 598.391 | 2.83204 | 0.72935 | 3.88299 | 0.0001   | 0.00078  | 67.7251 | 292.269 | 82.1199 | 1280.34 | 605.103 | 1262.78 | Up   |
| Dscaml1  | 113.355 | 2.69224 | 0.40592 | 6.63252 | 3.30E-11 | 9.44E-10 | 19.35   | 44.0799 | 27.6916 | 266.436 | 122.499 | 200.075 | Up   |
| Tagln    | 195.149 | -0.8808 | 0.30656 | -2.8731 | 0.00406  | 0.01823  | 167.378 | 342.098 | 249.224 | 130.626 | 168.964 | 112.605 | Down |
| Sidt2    | 6422.82 | 0.40188 | 0.11793 | 3.40771 | 0.00066  | 0.0039   | 6096.23 | 5138.18 | 5367.4  | 7176.15 | 8025.79 | 6733.17 | Up   |
| Zpr1     | 1893.16 | -0.2676 | 0.10059 | -2.6599 | 0.00782  | 0.03119  | 2010.47 | 1972.1  | 2222.01 | 1652.53 | 1762.51 | 1739.34 | Down |
| Gm31557  | 9.49976 | 2.13793 | 0.88099 | 2.42674 | 0.01524  | 0.05373  | 2.9025  | 1.91652 | 5.7293  | 24.8812 | 9.50423 | 12.0648 | Up   |
| Gm5617   | 286.991 | -0.4285 | 0.18323 | -2.3388 | 0.01935  | 0.06505  | 297.023 | 377.554 | 313.202 | 237.408 | 274.567 | 222.194 | Down |
| Zbtb16   | 1551.04 | -1.3923 | 0.3038  | -4.5829 | 4.59E-06 | 4.89E-05 | 1584.77 | 2420.56 | 2733.83 | 670.755 | 590.318 | 1306.02 | Down |
| Usp28    | 954.069 | -0.3914 | 0.13211 | -2.9627 | 0.00305  | 0.01428  | 1051.67 | 1190.16 | 1006.45 | 779.61  | 784.627 | 911.899 | Down |
| Ttc12    | 2274.34 | -0.3972 | 0.17549 | -2.2634 | 0.02361  | 0.07614  | 2377.15 | 2887.23 | 2492.24 | 2176.07 | 1497.44 | 2215.9  | Down |
| Ncam1    | 121.382 | -0.7325 | 0.31522 | -2.3238 | 0.02014  | 0.06711  | 99.6527 | 202.193 | 152.781 | 103.672 | 85.5381 | 84.4537 | Down |
| Plet1os  | 1311.23 | 1.73572 | 0.261   | 6.65018 | 2.93E-11 | 8.52E-10 | 680.154 | 660.24  | 476.487 | 1966.65 | 1320.03 | 2763.85 | Up   |
| Il18     | 1309.1  | 1.63895 | 0.2502  | 6.55065 | 5.73E-11 | 1.58E-09 | 897.841 | 550.999 | 460.254 | 1954.21 | 2346.49 | 1644.84 | Up   |
| Timm8b   | 916.647 | 0.26132 | 0.10409 | 2.51038 | 0.01206  | 0.04454  | 854.304 | 857.641 | 789.688 | 997.321 | 989.496 | 1011.43 | Up   |
| Pih1d2   | 1246.73 | -0.4243 | 0.19069 | -2.225  | 0.02608  | 0.08236  | 1339.02 | 1555.25 | 1392.22 | 1096.85 | 792.019 | 1305.01 | Down |
| Dlat     | 3759.23 | -0.3502 | 0.16847 | -2.0785 | 0.03766  | 0.10937  | 3900    | 5312.59 | 3427.07 | 3327.86 | 3282.13 | 3305.76 | Down |
| Dixdc1   | 2666.23 | -0.3773 | 0.14352 | -2.6288 | 0.00857  | 0.03365  | 3400.77 | 2850.82 | 2787.3  | 2400    | 1992.72 | 2565.78 | Down |
| 2310030G | 2211.4  | 0.22843 | 0.08505 | 2.6858  | 0.00724  | 0.02929  | 2068.52 | 2064.09 | 1977.56 | 2426.95 | 2325.37 | 2405.92 | Up   |
| Hspb2    | 95.0751 | -0.7116 | 0.33379 | -2.132  | 0.033    | 0.09858  | 90.9451 | 161.946 | 101.218 | 63.2397 | 89.7622 | 63.3403 | Down |
| Cryab    | 13404.5 | -0.6983 | 0.13454 | -5.1908 | 2.09E-07 | 2.95E-06 | 14655.7 | 19284   | 15820.5 | 10563.1 | 10788.4 | 9315.04 | Down |
| Alg9     | 1810.68 | 0.47105 | 0.11616 | 4.05531 | 5.01E-05 | 0.00041  | 1534.46 | 1376.06 | 1642.4  | 2177.1  | 2178.58 | 1955.5  | Up   |
| Gm32742  | 364.21  | 1.40744 | 0.25515 | 5.51608 | 3.47E-08 | 5.64E-07 | 187.695 | 270.229 | 140.368 | 597.148 | 450.923 | 538.895 | Up   |
| Arhgap20 | 38.7921 | 1.56882 | 0.45685 | 3.434   | 0.00059  | 0.00359  | 29.025  | 15.3321 | 14.3232 | 57.0194 | 71.8097 | 45.243  | Up   |
| Fdx1     | 3658.67 | -0.2818 | 0.13306 | -2.1176 | 0.03421  | 0.10141  | 4212.5  | 3794.7  | 4037.24 | 3846.22 | 2910.41 | 3150.93 | Down |
| Zc3h12c  | 797.08  | 0.37379 | 0.13417 | 2.78589 | 0.00534  | 0.02288  | 742.074 | 721.569 | 619.719 | 896.759 | 832.148 | 970.212 | Up   |
| Acat1    | 6222.77 | -0.6952 | 0.15774 | -4.4071 | 1.05E-05 | 0.0001   | 7140.16 | 9533.72 | 6407.26 | 4826.95 | 4675.02 | 4753.54 | Down |
| Sln      | 2474.48 | -6.1068 | 1.39971 | -4.3629 | 1.28E-05 | 0.00012  | 2940.24 |         |         |         |         |         |      |

|           |         |         |         |         |          |          |         |         |         |         |         |         |      |
|-----------|---------|---------|---------|---------|----------|----------|---------|---------|---------|---------|---------|---------|------|
| Ireb2     | 4939.42 | 0.2243  | 0.09543 | 2.35042 | 0.01875  | 0.06354  | 4467.92 | 4519.15 | 4681.79 | 5053.99 | 5138.62 | 5775.02 | Up   |
| Hykk      | 613.777 | -0.6019 | 0.22528 | -2.6715 | 0.00755  | 0.03034  | 858.174 | 616.16  | 745.764 | 572.267 | 346.376 | 543.922 | Down |
| ChrnB4    | 48.3616 | 2.55195 | 0.44091 | 5.78796 | 7.12E-09 | 1.33E-07 | 13.545  | 18.2069 | 10.5037 | 88.1208 | 103.49  | 56.3024 | Up   |
| Tmem266   | 37.2768 | -0.9389 | 0.42451 | -2.2117 | 0.02699  | 0.08458  | 48.3751 | 55.579  | 42.9697 | 32.1382 | 28.5127 | 16.0864 | Down |
| EtfA      | 6203.19 | -0.642  | 0.15465 | -4.1509 | 3.31E-05 | 0.00028  | 6907.96 | 9296.07 | 6478.88 | 5133.82 | 4675.02 | 4727.39 | Down |
| Isl2      | 7.45487 | -1.9411 | 0.89072 | -2.1792 | 0.02931  | 0.09031  | 10.6425 | 13.4156 | 11.4586 | 2.07343 | 2.11205 | 5.027   | Down |
| Gm7435    | 115.244 | -0.9255 | 0.24507 | -3.7764 | 0.00016  | 0.00114  | 130.613 | 153.321 | 169.014 | 68.4232 | 87.6501 | 82.4429 | Down |
| Pstpip1   | 647.047 | 0.38951 | 0.11623 | 3.3511  | 0.0008   | 0.00464  | 592.111 | 538.541 | 550.013 | 753.692 | 737.106 | 710.818 | Up   |
| Tspan3    | 4983.78 | -0.5705 | 0.14402 | -3.9615 | 7.45E-05 | 0.00059  | 5422.85 | 7057.57 | 5389.36 | 4276.45 | 3623.22 | 4133.2  | Down |
| Snx33     | 2047.07 | -0.2103 | 0.0958  | -2.1953 | 0.02814  | 0.08755  | 2213.64 | 2128.29 | 2245.88 | 1846.39 | 2024.4  | 1823.8  | Down |
| Ptpn9     | 545.109 | 0.55988 | 0.17231 | 3.24925 | 0.00116  | 0.0063   | 512.776 | 411.093 | 398.186 | 562.937 | 654.736 | 730.926 | Up   |
| Scamp5    | 764.054 | 1.57635 | 0.20953 | 7.52333 | 5.34E-14 | 2.37E-12 | 354.106 | 453.256 | 343.758 | 1032.57 | 1462.6  | 938.039 | Up   |
| Scamp2    | 4611.78 | 0.57583 | 0.09879 | 5.82902 | 5.58E-09 | 1.07E-07 | 3938.7  | 3617.43 | 3554.07 | 5629.37 | 5796.52 | 5134.58 | Up   |
| Cyp1a1    | 2785.81 | -3.7702 | 0.90628 | -4.1601 | 3.18E-05 | 0.00028  | 10659   | 1556.21 | 3358.32 | 377.365 | 165.796 | 598.214 | Down |
| Edc3      | 1896.76 | -0.3177 | 0.14439 | -2.2004 | 0.02778  | 0.08662  | 1866.31 | 1980.72 | 2467.42 | 1624.53 | 1595.65 | 1845.92 | Down |
| Sema7a    | 6182.48 | -0.7021 | 0.11265 | -6.2325 | 4.59E-10 | 1.07E-08 | 7208.85 | 7757.1  | 8007.65 | 5019.78 | 4164.96 | 4936.52 | Down |
| Ccdc33    | 1632.88 | -0.6067 | 0.22763 | -2.6653 | 0.00769  | 0.03079  | 1531.55 | 2542.26 | 1840.06 | 1404.75 | 971.543 | 1507.1  | Down |
| Stra6     | 34.0556 | -1.6199 | 0.68142 | -2.3773 | 0.01744  | 0.05985  | 17.415  | 75.7024 | 61.1125 | 9.33044 | 11.6163 | 29.1566 | Down |
| Islr      | 614.993 | -1.1724 | 0.14801 | -7.9209 | 2.36E-15 | 1.24E-13 | 804.961 | 938.135 | 812.605 | 405.356 | 398.122 | 330.777 | Down |
| Insyn1    | 615.894 | 0.60891 | 0.18943 | 3.21443 | 0.00131  | 0.00699  | 468.271 | 603.703 | 391.502 | 668.682 | 771.955 | 791.25  | Up   |
| Cd276     | 573.218 | 1.20725 | 0.1548  | 7.79897 | 6.24E-15 | 3.12E-13 | 381.196 | 336.349 | 321.796 | 749.546 | 913.462 | 736.959 | Up   |
| Neo1      | 3416.92 | -0.3073 | 0.09877 | -3.1114 | 0.00186  | 0.00939  | 3867.1  | 3814.83 | 3656.25 | 3206.56 | 3162.8  | 2794.01 | Down |
| Hexa      | 8383.9  | 0.85852 | 0.17449 | 4.92027 | 8.64E-07 | 1.09E-05 | 7273.68 | 5649.89 | 4957.75 | 11077.3 | 12229.8 | 9114.96 | Up   |
| Gm20275   | 33.5508 | 1.28333 | 0.57766 | 2.22162 | 0.02631  | 0.08297  | 26.1225 | 9.58259 | 22.9172 | 76.717  | 33.7928 | 32.1728 | Up   |
| 92301121  | 52.124  | -0.8059 | 0.34727 | -2.3207 | 0.0203   | 0.0675   | 80.3026 | 55.579  | 63.0223 | 40.4319 | 42.241  | 31.1674 | Down |
| Gm17853   | 11.2409 | -1.4013 | 0.71215 | -1.9677 | 0.04911  | 0.13473  | 14.5125 | 16.2904 | 18.1428 | 8.29373 | 3.16808 | 7.03781 | Down |
| Larp6     | 169.202 | -0.7756 | 0.2192  | -3.5385 | 0.0004   | 0.00257  | 239.94  | 207.942 | 192.886 | 140.993 | 129.891 | 103.556 | Down |
| Rplp1     | 22476.8 | -0.3059 | 0.1415  | -2.1618 | 0.03063  | 0.09316  | 24217.5 | 22740.4 | 27594.2 | 21861.2 | 21685.5 | 16762   | Down |
| Kif23     | 551.245 | 1.1235  | 0.22338 | 5.02946 | 4.92E-07 | 6.48E-06 | 385.066 | 400.552 | 254.954 | 884.319 | 611.439 | 771.142 | Up   |
| Itga11    | 392.63  | -0.6429 | 0.27406 | -2.3459 | 0.01898  | 0.06412  | 380.228 | 527.042 | 529.005 | 286.134 | 209.093 | 424.279 | Down |
| Fem1b     | 4870.65 | 0.38631 | 0.09219 | 4.19012 | 2.79E-05 | 0.00024  | 4092.53 | 4012.23 | 5472.82 | 5465.25 | 5518.65 | 5518.65 | Up   |
| Calml4    | 1631.62 | -0.5719 | 0.21555 | -2.6531 | 0.00798  | 0.03173  | 1781.17 | 2141.71 | 1929.82 | 1492.87 | 880.725 | 1563.4  | Down |
| 2300009A  | 344.125 | -0.4621 | 0.1876  | -2.4631 | 0.01377  | 0.04966  | 416.026 | 355.514 | 424.923 | 245.702 | 277.735 | 344.852 | Down |
| Iqch      | 21.5779 | -1.2552 | 0.5795  | -2.166  | 0.03031  | 0.09245  | 33.8626 | 22.9982 | 34.3758 | 20.7343 | 8.4482  | 9.04861 | Down |
| Smad3     | 2826.94 | -0.2392 | 0.09499 | -2.5186 | 0.01178  | 0.04372  | 3057.3  | 3027.14 | 3097.64 | 2563.8  | 2783.68 | 2432.06 | Down |
| Gm18541   | 123.91  | 0.57366 | 0.23585 | 2.43231 | 0.015    | 0.05306  | 107.393 | 105.408 | 85.9395 | 160.691 | 157.348 | 126.681 | Up   |
| Gm36033   | 179.01  | -0.8855 | 0.23684 | -3.7386 | 0.00019  | 0.00131  | 215.753 | 203.151 | 277.871 | 150.324 | 120.387 | 106.572 | Down |
| Smad6     | 6728.91 | -1.1947 | 0.16356 | -7.3044 | 2.78E-13 | 1.09E-11 | 8257.63 | 9680.33 | 10160   | 4167.68 | 4832.37 | 3275.6  | Down |
| Scarletlr | 22.7301 | -1.198  | 0.57894 | -2.0694 | 0.03851  | 0.11126  | 24.1875 | 28.7478 | 42.0148 | 21.771  | 11.6163 | 8.04321 | Down |
| Lctl      | 66.9157 | -9.4608 | 1.73039 | -5.4674 | 4.57E-08 | 7.29E-07 | 110.295 | 259.688 | 31.5111 | 0       | 0       | 0       | Down |
| Map2k1    | 5322.17 | 0.5925  | 0.09395 | 6.30685 | 2.85E-10 | 6.98E-09 | 4397.29 | 4229.75 | 4106    | 6202.67 | 6889.51 | 6107.81 | Up   |
| Hacd3     | 9652.37 | 0.63195 | 0.10502 | 6.01728 | 1.77E-09 | 3.71E-08 | 8299.23 | 6885.09 | 7530.21 | 11521   | 12278.4 | 11400.2 | Up   |
| Dpp8      | 399.731 | 0.71188 | 0.18439 | 3.86064 | 0.00011  | 0.00085  | 311.535 | 265.438 | 332.299 | 417.796 | 494.22  | 577.1   | Up   |
| Gm47350   | 4360.99 | -0.2803 | 0.1021  | -2.7454 | 0.00604  | 0.02531  | 4656.58 | 4635.1  | 5058.01 | 3738.4  | 4287.46 | 3790.36 | Down |
| Cilp      | 179.383 | -1.3771 | 0.4552  | -3.0253 | 0.00248  | 0.01198  | 163.508 | 405.343 | 208.164 | 140.993 | 114.051 | 44.2376 | Down |
| Clpx      | 3516.67 | -0.2565 | 0.10383 | -2.4708 | 0.01348  | 0.04877  | 3507.19 | 4171.3  | 3807.12 | 3157.84 | 3143.79 | 3312.8  | Down |
| Pdcd7     | 1123.16 | -0.2887 | 0.09528 | -3.0304 | 0.00244  | 0.0118   | 1259.69 | 1208.36 | 1237.53 | 1026.35 | 990.552 | 1016.46 | Down |
| Ras12     | 3612.65 | -0.4019 | 0.14882 | -2.7008 | 0.00692  | 0.02826  | 3528.48 | 4201.96 | 4607.31 | 2993    | 3567.25 | 2777.92 | Down |
| Slc51b    | 80.1716 | -0.6536 | 0.28625 | -1.969  | 0.04895  | 0.13435  | 77.4001 | 102.534 | 106.947 | 55.9827 | 71.8097 | 66.3565 | Down |
| Spg21     | 5857.63 | 0.77392 | 0.1098  | 7.04829 | 1.81E-12 | 6.26E-11 | 4737.85 | 4166.51 | 4064.94 | 7707.98 | 7670.97 | 6797.52 | Up   |
| Rbpms2    | 432.676 | -1.0043 | 0.24967 | -4.0222 | 5.76E-05 | 0.00047  | 455.693 | 792.48  | 484.126 | 266.436 | 337.928 | 259.393 | Down |
| Zfp609    | 1968.29 | 0.24865 | 0.11764 | 2.11377 | 0.03453  | 0.1022   | 1858.57 | 1635.75 | 1903.08 | 1970.8  | 2133.17 | 2308.4  | Up   |
| Csnk1g1   | 1431.37 | 0.31276 | 0.12831 | 2.43757 | 0.01479  | 0.05247  | 1397.07 | 1193.03 | 1240.39 | 1413.04 | 1713.93 | 1630.76 | Up   |
| Ppib      | 4472.82 | 0.27559 | 0.09362 | 2.94381 | 0.00324  | 0.01503  | 4135.1  | 3793.75 | 4211.99 | 5099.61 | 4654.96 | 4941.55 | Up   |
| Snx1      | 7116.71 | 0.60169 | 0.12266 | 4.90516 | 9.34E-07 | 1.16E-05 | 5944.33 | 5280.01 | 5736.94 | 8331.05 | 9740.78 | 7667.19 | Up   |
| Ciao2a    | 3142.89 | 0.62665 | 0.0944  | 6.63811 | 3.18E-11 | 9.13E-10 | 2510.67 | 2525.01 | 2376.7  | 3873.17 | 4007.62 | 3564.15 | Up   |
| Fbxl22    | 298.728 | -1.3452 | 0.43506 | -3.0921 | 0.00199  | 0.00992  | 214.785 | 793.438 | 277.871 | 179.352 | 192.197 | 134.724 | Down |
| Usp3      | 2917.66 | 0.5867  | 0.10308 | 5.69163 | 1.26E-08 | 2.23E-07 | 2548.4  | 2196.33 | 2252.57 | 3483.37 | 3640.12 | 3385.18 | Up   |
| Aph1c     | 909.554 | 0.34613 | 0.15074 | 2.29622 | 0.02166  | 0.071    | 938.476 | 734.984 | 729.531 | 1102.03 | 939.863 | 1012.44 | Up   |
| Rab8b     | 3740.24 | 0.29137 | 0.13761 | 2.11741 | 0.03422  | 0.10143  | 3703.6  | 3141.17 | 3246.6  | 3673.08 | 4769.01 | 3907.99 | Up   |
| Lactb     | 1107.52 | 0.2934  | 0.1081  | 2.71407 | 0.00665  | 0.0273   | 1040.06 | 1013.84 | 931.966 | 1162.16 | 1272.51 | 1224.58 | Up   |
| Tpm1      | 32339.6 | -0.6561 | 0.23751 | -2.7625 | 0.00574  | 0.0243   | 29615.2 | 58069.5 | 31023.2 | 24880.1 | 26081.7 | 24367.9 | Down |
| Gm19299   | 305.167 | -0.6134 | 0.22558 | -2.7194 | 0.00654  | 0.02698  | 384.098 | 403.427 | 319.886 | 277.84  | 175.3   | 270.453 | Down |
| Vps13c    | 1076.36 | 0.576   | 0.14808 | 3.88975 | 0.0001   | 0.00076  | 990.722 | 784.814 | 817.38  | 1150.75 | 1424.58 | 1289.93 | Up   |
| 4930502A  | 60.0956 | 0.87987 | 0.42892 | 2.05134 | 0.04023  | 0.11504  | 66.7576 | 26.8312 | 33.4209 | 69.46   | 67.5856 | 96.5185 | Up   |
| Anxa2     | 42899.2 | 0.47517 | 0.11316 | 4.19919 | 2.68E-05 | 0.00024  | 34824.2 | 34863.4 | 38005.3 | 50925.6 | 54743.3 | 44033.5 | Up   |
| B230323A  | 113.753 | 8.46754 | 1.15699 | 7.31857 | 2.51E-13 | 9.97E-12 | 1.935   | 0       | 0       | 206.306 | 392.841 | 81.4375 | Down |
| Gtf2a2    | 2960.02 | -0.2657 | 0.09122 | -2.9127 | 0.00358  | 0.01638  | 3043.76 | 3282.04 | 3369.78 | 2653.99 | 2631.62 | 2778.93 | Down |
| Fam81a    | 919.202 | -1.0223 | 0.18486 | -5.5303 | 3.20E-08 | 5.26E-07 | 1229.69 | 1324.31 | 1142.04 | 591.965 | 474.155 | 753.045 | Down |
| Myo1e     | 4521.43 | 0.42919 | 0.14191 | 3.0244  | 0.00249  | 0.01201  | 3259.51 | 3791.83 | 4509.91 | 5003.19 | 5566.31 | 4997.85 | Up   |
| Cnbl2     | 230.757 | 0.67255 | 0.169   | 3.97958 | 6.90E-05 | 0.00055  | 173.183 | 186.86  | 173.789 | 291.317 | 259.782 | 299.609 | Up   |
| Rnf111    | 2765.31 | 0.27556 | 0.0853  | 3.23036 | 0.00124  | 0.00667  | 2515.5  | 2555.68 | 2434.95 | 2914.21 | 3048.75 | 3122.78 | Up   |
| Adam10    | 7276.5  | 0.64264 | 0.10241 | 6.27512 | 3.49E-10 | 8.35E-09 | 6098.16 | 5311.63 | 5636.67 | 8242.93 | 9352.16 | 9017.44 | Up   |
| Lipc      | 55.6049 | 1.26598 | 0.35152 | 3.60142 | 0.00032  | 0.00208  | 34.8301 | 36.4138 | 26.7367 | 98.488  | 71.8097 | 65.3511 | Up   |
| Aqp9      | 212.123 | 1.47855 | 0.2401  | 6.15819 | 7.36E-10 | 1.66E-08 | 104.49  | 136.073 | 95.4883 | 278.877 | 383.337 | 274.474 | Up   |
| Myzap     | 8761.92 | -0.8072 | 0.1     | -8.0727 | 6.87E-16 | 3.91E-14 | 10439.3 | 11492.4 | 11521.6 | 6224.44 | 6888.45 | 6005.26 | Down |
| 4930509E  | 30.997  | -1.1614 | 0.5424  | -2.1411 | 0.03226  | 0.09679  | 32.895  | 57.4955 | 38.1953 |         |         |         |      |

|          |         |         |         |         |          |          |         |         |         |         |         |         |      |
|----------|---------|---------|---------|---------|----------|----------|---------|---------|---------|---------|---------|---------|------|
| Myo5a    | 1889    | 1.17077 | 0.17497 | 6.69121 | 2.21E-11 | 6.56E-10 | 1356.44 | 1105.83 | 1023.63 | 2421.77 | 3170.19 | 2256.12 | Up   |
| Myo5c    | 7863.81 | 0.35497 | 0.11995 | 2.95922 | 0.00308  | 0.01442  | 6058.49 | 7107.4  | 7537.85 | 9360.51 | 8172.58 | 8946.06 | Up   |
| Gnb5     | 911.855 | -0.4063 | 0.1935  | -2.0999 | 0.03574  | 0.10498  | 819.474 | 1233.28 | 1065.65 | 730.885 | 694.865 | 926.98  | Down |
| Mapk6    | 3298.06 | 0.5978  | 0.11059 | 5.40554 | 6.46E-08 | 9.96E-07 | 2459.39 | 2794.28 | 2619.24 | 3864.88 | 4348.71 | 3701.89 | Up   |
| Tmod2    | 2686.19 | -0.4661 | 0.17904 | -2.6032 | 0.00924  | 0.03578  | 2385.86 | 3298.33 | 3664.84 | 1969.76 | 2444.7  | 2353.64 | Down |
| Lysmd2   | 1976.95 | -0.5065 | 0.14598 | -3.4695 | 0.00052  | 0.00321  | 2172.04 | 2257.66 | 2531.39 | 1444.15 | 1927.25 | 1529.21 | Down |
| Scg3     | 51.3327 | -1.1113 | 0.38975 | -2.8512 | 0.00436  | 0.0193   | 83.2051 | 70.9111 | 56.3381 | 30.0648 | 44.3531 | 23.1242 | Down |
| Bmp5     | 1356.22 | 0.73733 | 0.12646 | 5.83039 | 5.53E-09 | 1.06E-07 | 1065.22 | 991.798 | 994.033 | 1475.25 | 1816.36 | 1794.64 | Up   |
| Gm26903  | 81.2249 | 1.0036  | 0.35748 | 2.80741 | 0.00499  | 0.02169  | 45.4726 | 68.9946 | 47.7441 | 133.736 | 70.7537 | 120.648 | Up   |
| Hmgcll1  | 1481.26 | 0.28365 | 0.12076 | 2.34895 | 0.01883  | 0.06373  | 1208.41 | 1431.64 | 1368.35 | 1691.92 | 1491.11 | 1696.11 | Up   |
| Mlip     | 250.69  | -5.1938 | 0.82898 | -6.2653 | 3.72E-10 | 8.85E-09 | 269.933 | 996.589 | 197.661 | 11.4039 | 8.4482  | 20.108  | Down |
| Klhl31   | 231.687 | -4.9292 | 0.82558 | -5.9706 | 2.36E-09 | 4.85E-08 | 156.735 | 929.511 | 259.728 | 13.4773 | 10.5603 | 20.108  | Down |
| Gclc     | 36013.9 | 1.44885 | 0.13949 | 10.3867 | 2.85E-25 | 3.93E-23 | 21075.1 | 17662.6 | 19195.1 | 45244.4 | 51775.9 | 61130.4 | Up   |
| Elov5    | 17317.5 | 0.58335 | 0.10751 | 5.4261  | 5.76E-08 | 9.01E-07 | 13675.6 | 12475.6 | 15438.5 | 20969.7 | 20351.7 | 20993.8 | Up   |
| Fbxo9    | 4256.2  | 0.25934 | 0.09279 | 2.79502 | 0.00519  | 0.02237  | 4123.49 | 3748.71 | 3751.73 | 4591.61 | 4856.66 | 4464.99 | Up   |
| Cilk1    | 4759.58 | 0.35189 | 0.08886 | 3.9599  | 7.50E-05 | 0.00059  | 3961.92 | 4172.26 | 4411.56 | 5327.68 | 5508.23 | 5175.8  | Up   |
| Gsta1    | 15.7432 | -1.8436 | 0.71882 | -2.5648 | 0.01032  | 0.03925  | 17.415  | 41.2051 | 15.2781 | 8.29373 | 4.2241  | 8.04321 | Down |
| Gm10639  | 6.16049 | -2.3119 | 0.99404 | -2.3257 | 0.02003  | 0.06692  | 13.545  | 9.58259 | 7.63906 | 2.07343 | 2.11205 | 2.0108  | Down |
| Gsta2    | 341.737 | -2.9782 | 0.45017 | -6.6158 | 3.69E-11 | 1.05E-09 | 952.021 | 438.882 | 428.742 | 105.745 | 28.5127 | 96.5185 | Down |
| Dppa5a   | 13.4775 | -1.9579 | 0.68333 | -2.8652 | 0.00417  | 0.01861  | 19.35   | 16.2904 | 28.6465 | 6.2203  | 6.33615 | 4.0216  | Down |
| Cgas     | 190.169 | 0.42666 | 0.19167 | 2.22598 | 0.02602  | 0.08219  | 165.443 | 165.779 | 155.646 | 213.563 | 193.253 | 247.329 | Up   |
| Slc17a5  | 1992.32 | 0.46962 | 0.12373 | 3.79556 | 0.00015  | 0.00107  | 1857.6  | 1697.08 | 1458.11 | 2366.82 | 2217.65 | 2356.66 | Up   |
| Cd109    | 98.2239 | -0.9201 | 0.33458 | -2.7499 | 0.00596  | 0.02503  | 89.0101 | 135.114 | 161.375 | 53.9092 | 86.5941 | 63.3403 | Down |
| Gm8116   | 514.584 | 0.42978 | 0.17594 | 2.44275 | 0.01458  | 0.05187  | 440.213 | 395.761 | 479.351 | 608.552 | 679.024 | 484.603 | Up   |
| Gm10635  | 9.69547 | -2.5902 | 0.88587 | -2.9239 | 0.00346  | 0.0159   | 9.67501 | 23.9565 | 16.233  | 2.07343 | 4.2241  | 2.0108  | Down |
| Tmem30a  | 27446.7 | 0.98205 | 0.09652 | 10.1748 | 2.57E-24 | 3.20E-22 | 18475.4 | 17968.3 | 18905.7 | 33474.5 | 39503.8 | 36352.3 | Up   |
| 4930429F | 339.35  | -0.7717 | 0.21742 | -3.5492 | 0.00039  | 0.00248  | 348.301 | 524.167 | 411.555 | 206.306 | 269.286 | 276.485 | Down |
| Filip1   | 654.052 | -0.4047 | 0.18719 | -2.162  | 0.03062  | 0.09315  | 654.031 | 871.057 | 710.433 | 456.155 | 650.512 | 582.127 | Down |
| Myo6     | 5258.02 | 0.20587 | 0.08464 | 2.43243 | 0.015    | 0.05305  | 4891.69 | 4863.16 | 4895.68 | 5291.4  | 5806.03 | 5800.16 | Up   |
| Gm9531   | 198.803 | 0.39742 | 0.18557 | 2.14165 | 0.03222  | 0.09673  | 175.118 | 172.487 | 167.105 | 207.343 | 256.614 | 214.15  | Up   |
| Gm26907  | 1.71342 | 4.27884 | 2.17645 | 1.96597 | 0.0493   | NA       | 0       | 0       | 0       | 4.14686 | 2.11205 | 4.0216  | Up   |
| Mei4     | 33.961  | -1.2015 | 0.55054 | -2.1824 | 0.02908  | 0.08983  | 33.8626 | 79.5355 | 28.6465 | 22.8077 | 14.7844 | 24.1296 | Down |
| Sh3bgrl2 | 3125.88 | 0.55502 | 0.17073 | 3.25095 | 0.00115  | 0.00628  | 2123.67 | 2903.52 | 2568.63 | 3234.55 | 3467.99 | 4456.94 | Up   |
| Gm36120  | 4.58809 | 3.73967 | 1.628   | 2.29709 | 0.02161  | 0.07086  | 0       | 1.91652 | 0       | 12.4406 | 2.11205 | 11.0594 | Up   |
| Ttk      | 69.7157 | 0.77016 | 0.34809 | 2.21256 | 0.02693  | 0.08447  | 52.2451 | 66.1198 | 36.2855 | 71.5334 | 85.5381 | 106.572 | Up   |
| Bckdhh   | 1087.61 | -0.4042 | 0.12844 | -3.1471 | 0.00165  | 0.00848  | 1127.14 | 1365.52 | 1224.16 | 880.172 | 1013.78 | 914.915 | Down |
| 4933431K | 80.8612 | -0.9031 | 0.30029 | -3.0075 | 0.00263  | 0.01259  | 128.678 | 103.492 | 84.0297 | 58.0561 | 48.5772 | 62.3349 | Down |
| Pgm3     | 876.244 | 0.52545 | 0.13762 | 3.81823 | 0.00013  | 0.00098  | 761.424 | 763.732 | 630.223 | 1085.44 | 939.863 | 1076.78 | Up   |
| Me1      | 8777.02 | 0.43362 | 0.20986 | 2.0662  | 0.03881  | 0.11186  | 7827.09 | 8781.48 | 5795.18 | 8828.67 | 8401.74 | 13028   | Up   |
| Snap91   | 44.9964 | -3.8448 | 0.62491 | -6.1526 | 7.62E-10 | 1.71E-08 | 57.0826 | 146.614 | 48.699  | 6.2203  | 6.33615 | 5.027   | Down |
| Nt5e     | 6342.76 | 0.46815 | 0.16166 | 2.89589 | 0.00378  | 0.01714  | 6547.08 | 5131.48 | 4289.33 | 7023.75 | 7381.62 | 7683.27 | Up   |
| Syncr1p  | 1670.92 | 0.31326 | 0.12587 | 2.4888  | 0.01282  | 0.04684  | 1545.1  | 1352.1  | 1573.65 | 1738.57 | 1753    | 2063.08 | Up   |
| Gm38214  | 6.00546 | -1.9968 | 0.99825 | -2.0003 | 0.04546  | 0.12654  | 10.6425 | 9.58259 | 8.59395 | 4.14686 | 1.05603 | 2.0108  | Down |
| Gm10634  | 22.8593 | 1.676   | 0.54435 | 3.0789  | 0.00208  | 0.01028  | 14.5125 | 12.4574 | 5.7293  | 39.3952 | 35.9049 | 29.1566 | Up   |
| Gm26611  | 10.8861 | 1.95138 | 0.88808 | 2.19732 | 0.028    | 0.08716  | 1.935   | 1.91652 | 9.54883 | 17.6242 | 23.2326 | 11.0594 | Up   |
| Gm2396   | 4.84647 | 3.82176 | 1.62982 | 2.3449  | 0.01903  | 0.06422  | 0       | 1.91652 | 0       | 10.3672 | 14.7844 | 2.0108  | Up   |
| Bcl2a1a  | 436.351 | 2.04958 | 0.24772 | 8.27377 | 1.30E-16 | 8.09E-15 | 209.948 | 150.447 | 148.962 | 656.241 | 916.63  | 535.879 | Up   |
| 4930579C | 5.15819 | 2.81665 | 1.35097 | 2.08491 | 0.03708  | 0.10806  | 1.935   | 0       | 1.90977 | 13.4773 | 11.6163 | 2.0108  | Up   |
| Gm47403  | 19.9221 | 1.91995 | 0.6224  | 3.08474 | 0.00204  | 0.01012  | 7.74001 | 11.4991 | 5.7293  | 27.9913 | 46.4651 | 20.108  | Up   |
| Tmed3    | 4272.27 | 0.39651 | 0.09628 | 4.11841 | 3.81E-05 | 0.00032  | 3792.61 | 3706.54 | 3567.44 | 5250.97 | 4593.71 | 4722.37 | Up   |
| Rasgrf1  | 232.423 | -2.1255 | 0.30236 | -7.0297 | 2.07E-12 | 7.08E-11 | 460.531 | 283.645 | 390.547 | 93.3044 | 54.9133 | 111.599 | Down |
| Ctsh     | 29710.7 | 1.02603 | 0.13333 | 7.69532 | 1.41E-14 | 6.65E-13 | 22962.7 | 17930.9 | 17815.3 | 43064.1 | 37907.1 | 38584.3 | Up   |
| Morf4l1  | 15352.9 | -0.2365 | 0.07754 | -3.0507 | 0.00228  | 0.01114  | 16454.3 | 16255.9 | 17116.3 | 13716.8 | 13921.6 | 14652.7 | Down |
| Tbc1d2b  | 556.332 | 0.71335 | 0.26235 | 2.71912 | 0.00655  | 0.02699  | 603.721 | 314.309 | 346.622 | 574.341 | 732.882 | 766.115 | Up   |
| Plscr1   | 6881.6  | 0.4096  | 0.10503 | 3.89996 | 9.62E-05 | 0.00073  | 5275.79 | 6345.59 | 6112.21 | 7671.7  | 8074.37 | 7809.95 | Up   |
| Plscr4   | 4599.82 | -0.5306 | 0.10619 | -4.9965 | 5.84E-07 | 7.61E-06 | 5754.7  | 5041.4  | 5512.54 | 3519.65 | 4066.75 | 3703.9  | Down |
| Gm38391  | 57.2539 | -0.6751 | 0.32164 | -2.0988 | 0.03583  | 0.10515  | 63.8551 | 80.4937 | 66.8418 | 51.8358 | 43.297  | 37.1998 | Down |
| Plod2    | 3173.47 | -0.6174 | 0.10506 | -5.8767 | 4.19E-09 | 8.28E-08 | 4009.33 | 3486.14 | 4031.52 | 2629.11 | 2421.47 | 2463.23 | Down |
| Dipk2a   | 6650.03 | -0.3533 | 0.13254 | -2.6653 | 0.00769  | 0.03079  | 8709.45 | 6514.24 | 7156.85 | 5569.24 | 5834.54 | 6115.85 | Down |
| Paqr9    | 136.667 | -3.2398 | 0.49978 | -6.4824 | 9.03E-11 | 2.40E-09 | 215.753 | 431.216 | 94.5334 | 29.028  | 25.3446 | 24.1296 | Down |
| Pcolce2  | 9830.08 | -0.8225 | 0.12158 | -6.7651 | 1.33E-11 | 4.10E-10 | 13470.5 | 12470.8 | 11734.6 | 6852.69 | 8038.47 | 6413.45 | Down |
| Trpc1    | 962.732 | -0.5119 | 0.13817 | -3.7049 | 0.00021  | 0.00146  | 1131.01 | 1129.79 | 1134.4  | 679.049 | 901.846 | 800.299 | Down |
| Pls1     | 1970.51 | 0.58194 | 0.12298 | 4.73209 | 2.22E-06 | 2.53E-05 | 1671.84 | 1427.81 | 1635.71 | 2385.48 | 2138.45 | 2563.77 | Up   |
| Gm16794  | 84.8489 | -0.6278 | 0.25353 | -2.4763 | 0.01328  | 0.04816  | 97.7176 | 107.325 | 104.082 | 67.3865 | 60.1934 | 72.3889 | Down |
| Gk5      | 333.798 | 0.71395 | 0.18445 | 3.87066 | 0.00011  | 0.00081  | 260.258 | 208.9   | 289.33  | 389.805 | 459.371 | 395.123 | Up   |
| Atp1b3   | 11727.3 | 0.32079 | 0.09178 | 3.49502 | 0.00047  | 0.00296  | 10415.2 | 10369.3 | 10501.8 | 12621   | 14144.4 | 12312.1 | Up   |
| Pxylp1   | 956.531 | -0.9281 | 0.2771  | -3.3495 | 0.00081  | 0.00466  | 1250.01 | 1364.56 | 1147.77 | 588.855 | 409.738 | 978.255 | Down |
| Gm10123  | 3733.54 | 0.24126 | 0.07588 | 3.17961 | 0.00147  | 0.00773  | 3417.22 | 3419.07 | 3429.94 | 4123.02 | 4025.57 | 3986.41 | Up   |
| Clstn2   | 1155.18 | -0.3157 | 0.15203 | -2.0765 | 0.03784  | 0.10979  | 1085.54 | 1342.52 | 1415.14 | 905.053 | 1092.99 | 1089.85 | Down |
| Rbp1     | 2395.93 | -0.9441 | 0.12865 | -7.3379 | 2.17E-13 | 8.70E-12 | 2789.31 | 3152.67 | 3516.83 | 1650.45 | 1757.23 | 1509.11 | Down |
| Rbp2     | 122.21  | 1.41113 | 0.37113 | 3.80225 | 0.00014  | 0.00104  | 40.6351 | 77.619  | 82.1199 | 220.82  | 112.995 | 199.069 | Up   |
| Copb2    | 8438.51 | 0.28051 | 0.07825 | 3.58454 | 0.00034  | 0.0022   | 7669.38 | 7783.94 | 7408.94 | 9574.07 | 8955.1  | 9239.63 | Up   |
| Mrps22   | 752.68  | -0.2857 | 0.12493 | -2.2871 | 0.02219  | 0.07239  | 837.856 | 785.772 | 857.485 | 688.379 | 615.663 | 730.926 | Down |
| Pik3cb   | 2871.58 | 0.26513 | 0.12655 | 2.09512 | 0.03616  | 0.10596  | 2828.01 | 2274.91 | 2722.37 | 2993    | 3413.07 | 2998.11 | Up   |
| Cep70    | 1620.34 | -0.4429 | 0.10528 | -4.2065 | 2.59E-05 | 0.00023  | 1870.18 | 1777.57 | 1953.69 | 1451.4  | 172.73  | 1392.48 | Down |
| 4930422N | 161.449 | -0.9879 | 0.3149  | -3.1372 | 0.00171  | 0.00872  | 199.305 | 226.149 | 218.668 | 131.663 | 60.1934 | 132.713 | Down |
| Gm37249  | 184.243 | -0.7014 | 0.19985 | -3.5097 | 0.00045  | 0.00283  |         |         |         |         |         |         |      |

|           |         |         |         |         |          |          |         |         |         |         |         |         |      |
|-----------|---------|---------|---------|---------|----------|----------|---------|---------|---------|---------|---------|---------|------|
| Gm28979   | 3.20709 | -4.0386 | 1.83497 | -2.2009 | 0.02774  | 0.08652  | 3.87001 | 12.4574 | 1.90977 | 0       | 0       | 1.0054  | Down |
| Ky        | 573.769 | -1.023  | 0.38313 | -2.6702 | 0.00758  | 0.03044  | 430.538 | 1225.61 | 651.23  | 359.74  | 237.606 | 537.889 | Down |
| Cep63     | 2412.93 | -0.3189 | 0.11629 | -2.742  | 0.00611  | 0.02553  | 2386.83 | 2896.82 | 2751.97 | 2108.68 | 2055.03 | 2278.24 | Down |
| Anapc13   | 657.29  | -0.3047 | 0.11521 | -2.6445 | 0.00818  | 0.03241  | 690.796 | 757.983 | 730.485 | 607.515 | 581.87  | 575.089 | Down |
| Ryk       | 6268.66 | -0.2429 | 0.08931 | -2.7197 | 0.00653  | 0.02696  | 7182.73 | 6351.34 | 6851.28 | 5802.5  | 5825.04 | 5599.08 | Down |
| Rab6b     | 1131.07 | -1.0139 | 0.17139 | -5.9156 | 3.31E-09 | 6.65E-08 | 1647.65 | 1240.94 | 1650.04 | 866.694 | 726.545 | 654.516 | Down |
| Srprb     | 3988.56 | 0.2192  | 0.09172 | 2.38973 | 0.01686  | 0.05834  | 3799.38 | 3492.85 | 3766.06 | 4473.43 | 4330.76 | 4068.86 | Up   |
| Trf       | 41944.4 | 1.02172 | 0.18668 | 5.473   | 4.42E-08 | 7.09E-07 | 28957.3 | 28348.2 | 25743.6 | 59883.8 | 40342.3 | 68391.4 | Up   |
| Cpne4     | 24.6975 | 2.37015 | 0.80418 | 2.94729 | 0.00321  | 0.01492  | 6.77251 | 12.4574 | 4.77441 | 58.0561 | 58.0814 | 8.04321 | Up   |
| Col6a5    | 52.7479 | 1.34733 | 0.50797 | 2.65239 | 0.00799  | 0.03178  | 33.8626 | 12.4574 | 42.9697 | 106.782 | 58.0814 | 62.3349 | Up   |
| Col6a4    | 37.9793 | 3.51748 | 0.9441  | 3.72574 | 0.00019  | 0.00136  | 12.5775 | 0.95826 | 4.77441 | 120.259 | 80.2579 | 9.04861 | Up   |
| Twf2      | 2843.73 | -0.2526 | 0.11888 | -2.1249 | 0.03359  | 0.09998  | 2915.08 | 3345.28 | 3015.52 | 2675.76 | 2795.3  | 2315.44 | Down |
| Tlr9      | 68.4292 | 0.74059 | 0.30568 | 2.42277 | 0.0154   | 0.0542   | 60.9526 | 52.7042 | 40.1051 | 76.717  | 86.5941 | 93.5023 | Up   |
| Poc1a     | 323.131 | 0.45331 | 0.1535  | 2.95312 | 0.00315  | 0.01467  | 289.283 | 285.561 | 243.495 | 384.622 | 374.889 | 360.939 | Up   |
| Dusp7     | 6102.26 | -0.3607 | 0.14286 | -2.525  | 0.01157  | 0.04309  | 7979.95 | 5732.3  | 6871.34 | 5654.25 | 4969.66 | 5406.04 | Down |
| Rpl29     | 7046.3  | -0.6241 | 0.22347 | -2.7928 | 0.00523  | 0.02249  | 8957.13 | 7512.75 | 9171.65 | 4531.48 | 4315.98 | 7788.84 | Down |
| Acy1      | 506.426 | 0.67002 | 0.2035  | 3.29254 | 0.00099  | 0.00555  | 416.993 | 340.182 | 415.374 | 633.433 | 754.002 | 478.571 | Up   |
| Abhd14a   | 793.692 | -1.1684 | 0.15961 | -7.32   | 2.48E-13 | 9.89E-12 | 1176.48 | 1015.75 | 1103.84 | 442.678 | 438.251 | 585.143 | Down |
| Pcbp4     | 1638.44 | -0.3503 | 0.1288  | -2.72   | 0.00653  | 0.02694  | 1825.68 | 1716.24 | 1967.06 | 1346.69 | 1635.78 | 1339.19 | Down |
| Parp3     | 3870.84 | 0.55955 | 0.10925 | 5.12191 | 3.02E-07 | 4.16E-06 | 3268.22 | 3015.64 | 3104.32 | 4700.47 | 4998.17 | 4138.23 | Up   |
| Mapkapk3  | 3457.31 | 0.86381 | 0.1035  | 8.34619 | 7.05E-17 | 4.59E-15 | 2434.23 | 2594.01 | 2328    | 4401.9  | 4812.31 | 4173.42 | Up   |
| Cish      | 436.826 | 0.3787  | 0.15021 | 2.52117 | 0.0117   | 0.04347  | 372.488 | 356.472 | 410.6   | 517.321 | 438.251 | 525.825 | Up   |
| 6430571L  | 26.1499 | -1.4292 | 0.51995 | -2.7487 | 0.00598  | 0.0251   | 44.5051 | 44.0799 | 25.7818 | 16.5875 | 16.8964 | 9.04861 | Down |
| Cacna2d2  | 35.3429 | -2.5576 | 0.87781 | -2.9137 | 0.00357  | 0.01634  | 24.1875 | 144.697 | 12.4135 | 11.4039 | 5.28013 | 14.0756 | Down |
| Cyb561d2  | 687.438 | 0.66287 | 0.15675 | 4.22869 | 2.35E-05 | 0.00021  | 593.078 | 527.042 | 476.487 | 878.098 | 924.022 | 725.899 | Up   |
| Zmynd10   | 440.82  | -0.727  | 0.23861 | -3.0466 | 0.00231  | 0.01125  | 489.556 | 592.204 | 567.2   | 369.071 | 220.709 | 406.182 | Down |
| Hyal2     | 5067.19 | -0.7677 | 0.17233 | -4.4548 | 8.40E-06 | 8.42E-05 | 5302.88 | 5902.87 | 7947.49 | 3894.94 | 4057.25 | 3297.71 | Down |
| Lsmem2    | 132.79  | -0.6843 | 0.32558 | -2.1018 | 0.03557  | 0.10455  | 108.36  | 194.527 | 188.112 | 115.075 | 118.275 | 72.3889 | Down |
| Slc38a3   | 93.4558 | -5.2447 | 0.60287 | -8.6996 | 3.33E-18 | 2.53E-16 | 152.865 | 300.893 | 92.6236 | 4.14686 | 3.16808 | 7.03781 | Down |
| Sema3f    | 9742.19 | -0.2798 | 0.09283 | -3.0137 | 0.00258  | 0.01238  | 10916.3 | 9899.77 | 11235.2 | 8834.89 | 9115.61 | 8451.4  | Down |
| Uba7      | 3381.44 | 0.58952 | 0.09769 | 6.03486 | 1.59E-09 | 3.38E-08 | 2755.44 | 2696.54 | 2647.89 | 4115.76 | 4333.93 | 3739.09 | Up   |
| Gm20661   | 8.75296 | 1.98651 | 1.01164 | 1.96364 | 0.04957  | 0.1359   | 6.77251 | 2.87478 | 0.95488 | 6.2203  | 10.5603 | 25.135  | Up   |
| Cdhr4     | 1298.1  | 0.87409 | 0.23383 | 3.73821 | 0.00019  | 0.00131  | 911.386 | 1074.21 | 763.906 | 1951.1  | 1120.44 | 1967.57 | Up   |
| Ip6kk1    | 6845.77 | -0.2311 | 0.09253 | -2.4976 | 0.0125   | 0.04587  | 7473.95 | 6900.42 | 7804.26 | 6579    | 6204.15 | 6112.84 | Down |
| Gmpgb     | 967.372 | 0.59781 | 0.1228  | 4.86835 | 1.13E-06 | 1.37E-05 | 770.131 | 757.983 | 781.094 | 1293.82 | 1140.51 | 1060.7  | Up   |
| Rnf123    | 1189.04 | 0.23958 | 0.11054 | 2.16736 | 0.03021  | 0.09222  | 1138.75 | 1048.33 | 1084.75 | 1280.34 | 1199.64 | 1382.43 | Up   |
| Bsn       | 120.036 | 0.9058  | 0.26176 | 3.46049 | 0.00054  | 0.0033   | 77.4001 | 98.7006 | 74.4809 | 134.773 | 190.085 | 144.778 | Up   |
| Dag1      | 20124.8 | 0.50732 | 0.09338 | 5.43265 | 5.55E-08 | 8.75E-07 | 17391.8 | 17335.9 | 15139.7 | 24016.6 | 23476.5 | 23388.6 | Up   |
| Amt       | 931.367 | -0.5358 | 0.16809 | -3.1876 | 0.00143  | 0.00755  | 1063.28 | 1115.41 | 1128.67 | 702.893 | 638.895 | 939.044 | Down |
| Rhoa      | 22840.5 | 0.2669  | 0.09572 | 2.78834 | 0.0053   | 0.02275  | 21987.4 | 19123   | 21090.5 | 24587.8 | 26238   | 24016   | Up   |
| Gpx1      | 19934.6 | 0.55137 | 0.1233  | 4.47187 | 7.75E-06 | 7.85E-05 | 17861   | 15716.4 | 14935.3 | 24385.6 | 25757.5 | 20951.5 | Up   |
| 1700102P  | 37.726  | -0.6009 | 0.24316 | -2.4713 | 0.01346  | 0.04873  | 139.32  | 160.987 | 197.661 | 94.3411 | 121.443 | 112.605 | Down |
| Klhdc8b   | 3327.5  | -0.271  | 0.11879 | -2.2813 | 0.02253  | 0.07322  | 3312.73 | 3507.23 | 4097.4  | 3089.41 | 2835.43 | 3122.78 | Down |
| Qars      | 5309.13 | 0.29028 | 0.11743 | 2.47189 | 0.01344  | 0.04867  | 5251.6  | 4562.27 | 4516.6  | 6459.78 | 5496.61 | 5567.91 | Up   |
| Impdh2    | 2867.85 | -0.2263 | 0.09574 | -2.364  | 0.01808  | 0.06165  | 3143.41 | 3036.72 | 3096.69 | 2811.57 | 2667.52 | 2451.17 | Down |
| 48334451C | 39.6766 | 1.04339 | 0.36879 | 2.82921 | 0.00467  | 0.02046  | 23.22   | 25.873  | 28.6465 | 52.8725 | 60.1934 | 47.2538 | Up   |
| Wdr6      | 4592.67 | 0.55434 | 0.1181  | 4.69385 | 2.68E-06 | 3.01E-05 | 4127.36 | 3610.72 | 3425.16 | 5813.9  | 4992.89 | 5586.01 | Up   |
| P4htm     | 712.031 | -0.7316 | 0.15785 | -4.6345 | 3.58E-06 | 3.92E-05 | 995.559 | 803.979 | 867.034 | 575.377 | 455.147 | 575.089 | Down |
| Arih2     | 3302.78 | 0.24906 | 0.07903 | 3.15139 | 0.00162  | 0.00838  | 3081.49 | 2953.35 | 3020.29 | 3603.62 | 3638.01 | 3519.91 | Up   |
| Prkar2a   | 5536.69 | 0.42136 | 0.11461 | 3.67654 | 0.00024  | 0.0016   | 4598.53 | 4493.27 | 5109.58 | 5801.46 | 7010.95 | 6206.34 | Up   |
| Celsr3    | 73.5614 | 0.71225 | 0.32531 | 2.18943 | 0.02857  | 0.08858  | 73.5301 | 50.7877 | 42.9697 | 83.974  | 106.659 | 83.4483 | Up   |
| Col7a1    | 662.365 | 0.51599 | 0.25062 | 2.05889 | 0.03951  | 0.11342  | 419.896 | 578.788 | 636.907 | 693.563 | 591.374 | 1053.66 | Up   |
| Pfkfb4    | 4541.74 | 1.17386 | 0.10646 | 11.0262 | 2.86E-28 | 5.18E-26 | 3009.9  | 2759.78 | 2599.19 | 6786.02 | 6019.33 | 6019.33 | Up   |
| Shisa5    | 17612.1 | 0.58367 | 0.10017 | 5.82671 | 5.65E-09 | 1.08E-07 | 14785.4 | 13250.8 | 14255.4 | 21157.3 | 22694   | 19529.9 | Up   |
| Fbxw22    | 4.46715 | 3.69607 | 1.51011 | 2.44755 | 0.01438  | 0.05134  | 0       | 1.91652 | 0       | 8.29373 | 10.5603 | 6.03241 | Up   |
| Fbxw23    | 3.25939 | 4.17079 | 1.67945 | 2.48343 | 0.01301  | 0.04739  | 0.9675  | 0       | 0       | 6.2203  | 6.33615 | 6.03241 | Up   |
| Fbxw15    | 10.0406 | 3.53245 | 1.05686 | 3.3424  | 0.00083  | 0.00476  | 0       | 3.83303 | 0.95488 | 21.771  | 10.5603 | 23.1242 | Up   |
| Fbxw26    | 25.2783 | -2.9553 | 0.92485 | -3.1954 | 0.0014   | 0.00738  | 31.9275 | 89.1181 | 13.3684 | 2.07343 | 2.11205 | 13.0702 | Down |
| 3000002C  | 152.815 | -0.4243 | 0.21075 | -2.0132 | 0.04409  | 0.12363  | 182.858 | 181.111 | 161.375 | 113.002 | 147.844 | 130.702 | Down |
| Cdc25a    | 838.435 | 0.69758 | 0.13016 | 5.3593  | 8.35E-08 | 1.26E-06 | 674.349 | 574.955 | 669.373 | 1031.53 | 1116.22 | 964.179 | Up   |
| Scap      | 3409.03 | 0.45203 | 0.08894 | 5.08259 | 3.72E-07 | 5.04E-06 | 3053.43 | 2792.37 | 2792.08 | 3880.43 | 4053.03 | 3882.86 | Up   |
| Klhl18    | 1412.76 | 0.43922 | 0.11695 | 3.75567 | 0.00017  | 0.00123  | 1171.64 | 1094.33 | 1332.06 | 1575.81 | 1634.73 | 1667.96 | Up   |
| Myl3      | 130.725 | -3.3965 | 1.06089 | -3.2016 | 0.00137  | 0.00726  | 142.223 | 350.723 | 223.443 | 16.5875 | 2.11205 | 49.2646 | Down |
| Prss50    | 14.7938 | -1.7236 | 0.64514 | -2.6717 | 0.00755  | 0.03034  | 20.3175 | 22.0399 | 25.7818 | 10.3672 | 4.2241  | 6.03241 | Down |
| Tmie      | 296.083 | -0.8504 | 0.22832 | -3.7247 | 0.0002   | 0.00137  | 297.023 | 468.588 | 377.179 | 231.188 | 175.3   | 227.221 | Down |
| Als2cl    | 6950.73 | -0.2763 | 0.12107 | -2.2825 | 0.02246  | 0.07302  | 6583.85 | 7713.02 | 8546.2  | 6398.61 | 6349.88 | 6112.84 | Down |
| Lrrc2     | 320.891 | -2.5661 | 0.71816 | -3.5731 | 0.00035  | 0.00229  | 290.25  | 1103.91 | 253.044 | 65.3131 | 98.2104 | 114.616 | Down |
| Rtp3      | 419.355 | -0.7065 | 0.22965 | -3.0763 | 0.0021   | 0.01036  | 431.506 | 524.167 | 604.441 | 230.151 | 355.881 | 369.988 | Down |
| Ltf       | 21812   | 3.31775 | 0.95751 | 3.46498 | 0.00053  | 0.00326  | 856.239 | 9144.66 | 1927.91 | 40051.4 | 31896.2 | 46995.5 | Up   |
| Gm43814   | 138.277 | -0.6712 | 0.29357 | -2.2863 | 0.02224  | 0.07251  | 133.515 | 202.193 | 173.789 | 88.1208 | 142.563 | 89.4807 | Down |
| Cnr12     | 2339.37 | -0.3854 | 0.14909 | -2.5852 | 0.00973  | 0.03736  | 2390.7  | 2634.25 | 2924.81 | 2157.41 | 2243    | 1686.06 | Down |
| Lrrfp2    | 5848.6  | 0.2646  | 0.09456 | 2.79812 | 0.00514  | 0.02221  | 5485.73 | 5270.42 | 5185.01 | 6016.06 | 6895.85 | 6238.51 | Up   |
| Stac      | 137.293 | 2.44776 | 0.35162 | 6.96138 | 3.37E-12 | 1.11E-10 | 25.155  | 66.1198 | 36.2855 | 221.857 | 268.23  | 206.107 | Up   |
| Arpp21    | 47.0273 | 2.08281 | 0.56203 | 3.70586 | 0.00021  | 0.00146  | 28.0575 | 15.3321 | 10.5037 | 117.149 | 73.9218 | 37.1998 | Up   |
| Pdcfbip   | 12505.2 | 0.33605 | 0.08835 | 3.80364 | 0.00014  | 0.00104  | 11087.6 | 10926.1 | 11152.1 | 13542.6 | 15033.6 | 13289.4 | Up   |
| Clasp2    | 2771.07 | -0.2779 | 0.09932 | -2.7977 | 0.00515  | 0.02223  | 2884.12 | 3048.22 | 3178.81 | 2356.46 | 2665.41 | 2493.39 | Down |
| 4930520C  | 116.799 | -0.7244 | 0.32755 | -2.2117 | 0.02699  | 0.08458  | 108.36  | 192.61  | 135.593 | 116     |         |         |      |

|          |         |         |         |         |          |          |         |         |         |         |         |         |      |
|----------|---------|---------|---------|---------|----------|----------|---------|---------|---------|---------|---------|---------|------|
| D730003K | 173.558 | 2.70848 | 0.41093 | 6.59108 | 4.37E-11 | 1.22E-09 | 35.7976 | 64.2033 | 38.1953 | 294.427 | 156.292 | 452.43  | Up   |
| Eomes    | 56.2707 | -1.0665 | 0.41273 | -2.5841 | 0.00976  | 0.03745  | 74.4976 | 95.8259 | 58.2479 | 21.771  | 38.0169 | 49.2646 | Down |
| Itga9    | 1676.02 | 0.4645  | 0.10607 | 4.37901 | 1.19E-05 | 0.00011  | 1488.98 | 1382.77 | 1354.02 | 1953.17 | 1811.08 | 2066.1  | Up   |
| Gm2415   | 296.912 | -0.5986 | 0.15686 | -3.8159 | 0.00014  | 0.00099  | 389.903 | 334.432 | 348.532 | 243.628 | 240.774 | 224.204 | Down |
| Ctdspl   | 8338.09 | -0.2703 | 0.11073 | -2.4413 | 0.01464  | 0.05203  | 10226.5 | 8287.98 | 8836.49 | 7735.97 | 7641.4  | 7300.22 | Down |
| Scn5a    | 1569.34 | -3.038  | 0.25018 | -12.143 | 6.22E-34 | 1.79E-31 | 2191.39 | 3796.62 | 2406.3  | 306.868 | 273.511 | 441.371 | Down |
| Scn10a   | 45.4079 | -3.2609 | 0.65555 | -4.9743 | 6.55E-07 | 8.44E-06 | 66.7576 | 132.24  | 47.7441 | 15.5507 | 2.11205 | 8.04321 | Down |
| Rpsa     | 39063.6 | -0.2055 | 0.10056 | -2.0435 | 0.041    | 0.11681  | 42238.2 | 39142.9 | 44141.4 | 37788.3 | 37830   | 33240.6 | Down |
| Myrip    | 1931.48 | -0.8756 | 0.11716 | -7.4739 | 7.79E-14 | 3.38E-12 | 2205.9  | 2701.33 | 2593.46 | 1393.35 | 1370.72 | 1324.11 | Down |
| Eif1b    | 2508.48 | -0.3148 | 0.08778 | -3.5864 | 0.00034  | 0.00219  | 2770.92 | 2868.07 | 2704.23 | 2326.39 | 2217.65 | 2163.62 | Down |
| Entpd3   | 493.31  | -0.5461 | 0.21956 | -2.4872 | 0.01288  | 0.04698  | 510.841 | 512.668 | 733.35  | 410.539 | 318.92  | 473.544 | Down |
| Rpl14    | 11400.5 | -0.2627 | 0.12363 | -2.1252 | 0.03357  | 0.09993  | 13011.9 | 10869.5 | 13425.7 | 10565.2 | 11104.1 | 9426.64 | Down |
| Gm39458  | 10.4355 | 3.29731 | 1.16876 | 2.82121 | 0.00478  | 0.0209   | 4.83751 | 0       | 0.95488 | 5.18358 | 28.5127 | 23.1242 | Up   |
| Gm34425  | 13.9245 | 2.50745 | 0.83844 | 2.99061 | 0.00278  | 0.0132   | 5.80501 | 4.79129 | 1.90977 | 8.29373 | 29.5687 | 33.1782 | Up   |
| Gm39460  | 3.74426 | 3.42164 | 1.5796  | 2.16615 | 0.0303   | 0.09243  | 0       | 1.91652 | 0       | 6.2203  | 5.28013 | 9.04861 | Up   |
| Ctnnb1   | 6431.76 | 0.83033 | 0.13778 | 6.02656 | 1.67E-09 | 3.53E-08 | 5314.49 | 4054.39 | 4522.33 | 7456.06 | 8193.7  | 9049.61 | Up   |
| Ulk4     | 1661.26 | -0.4868 | 0.23113 | -2.1063 | 0.03518  | 0.10373  | 1642.82 | 2271.07 | 1903.08 | 1502.2  | 926.134 | 1722.25 | Down |
| Trak1    | 9660.99 | 0.21361 | 0.09745 | 2.19205 | 0.02838  | 0.08813  | 8487.89 | 9668.83 | 8684.66 | 10564.1 | 9793.58 | 10766.8 | Up   |
| Ss18l2   | 669.431 | -0.3853 | 0.1446  | -2.6648 | 0.0077   | 0.03083  | 755.619 | 789.605 | 729.531 | 658.315 | 580.814 | 502.7   | Down |
| Zfp651   | 1379.91 | -0.3591 | 0.13608 | -2.6384 | 0.00833  | 0.03288  | 1699.9  | 1616.58 | 1335.88 | 1281.38 | 1114.11 | 1231.62 | Down |
| Klhl40   | 11.7524 | -2.734  | 1.0431  | -2.621  | 0.00877  | 0.03427  | 5.80501 | 41.2051 | 14.3232 | 1.03672 | 2.11205 | 6.03241 | Down |
| Hhatl    | 551.744 | -1.964  | 0.30779 | -6.381  | 1.76E-10 | 4.50E-09 | 531.158 | 1204.53 | 899.5   | 226.004 | 164.74  | 284.528 | Down |
| Ccdc13   | 532.916 | -0.6199 | 0.22662 | -2.7355 | 0.00623  | 0.02597  | 587.273 | 747.442 | 602.531 | 443.714 | 296.743 | 519.792 | Down |
| Ackr2    | 2248.69 | -0.3069 | 0.11404 | -2.6913 | 0.00712  | 0.02892  | 2630.64 | 2263.41 | 2566.73 | 1986.35 | 2165.91 | 1879.09 | Down |
| Gask1a   | 383.142 | -0.5349 | 0.16631 | -3.2164 | 0.0013   | 0.00695  | 439.246 | 416.843 | 504.178 | 299.611 | 284.071 | 354.907 | Down |
| Pomgnt2  | 796.554 | -0.4477 | 0.13871 | -3.2277 | 0.00125  | 0.00673  | 966.534 | 915.137 | 875.628 | 716.371 | 726.545 | 579.111 | Down |
| Ano10    | 3194.78 | 0.33853 | 0.11051 | 3.06345 | 0.00219  | 0.01074  | 3123.09 | 2805.78 | 2536.17 | 3524.83 | 3633.78 | 3545.04 | Up   |
| Abhd5    | 2516.02 | 0.70912 | 0.15014 | 4.72316 | 2.32E-06 | 2.64E-05 | 2269.76 | 1675.99 | 1783.72 | 3031.36 | 3444.75 | 2890.53 | Up   |
| A730085K | 113.567 | 0.76542 | 0.34609 | 2.21162 | 0.02699  | 0.08459  | 60.9526 | 108.283 | 83.0748 | 108.855 | 199.589 | 120.648 | Up   |
| Gm47135  | 17.9928 | 2.5895  | 0.74564 | 3.47284 | 0.00051  | 0.00318  | 5.80501 | 5.74955 | 3.81953 | 15.5507 | 54.9133 | 22.1188 | Up   |
| Tcaim    | 93.1987 | 0.54443 | 0.2639  | 2.06301 | 0.03911  | 0.11252  | 70.6276 | 78.5772 | 78.3004 | 122.332 | 88.7061 | 120.648 | Up   |
| Kif15    | 208.513 | 0.46351 | 0.21427 | 2.16324 | 0.03052  | 0.09294  | 165.443 | 155.238 | 205.3   | 250.885 | 202.757 | 271.458 | Up   |
| Zdhhc3   | 10542   | 0.50383 | 0.11701 | 4.30568 | 1.66E-05 | 0.00015  | 9400.24 | 7485.92 | 9272.87 | 12513.2 | 12385.1 | 12194.5 | Up   |
| Cdcp1    | 3168.37 | 1.13477 | 0.08525 | 13.3107 | 2.01E-40 | 1.01E-37 | 1969.83 | 2027.68 | 1950.83 | 4249.5  | 4552.53 | 4259.88 | Up   |
| Sacm1l   | 1251.73 | 0.54127 | 0.16265 | 3.32776 | 0.00088  | 0.00497  | 1102.95 | 966.883 | 989.259 | 1256.5  | 1397.12 | 1797.66 | Up   |
| Slc6a20a | 573.297 | 2.10849 | 0.32739 | 6.44029 | 1.19E-10 | 3.13E-09 | 242.843 | 232.857 | 171.879 | 908.163 | 501.612 | 1382.43 | Up   |
| Fyco1    | 1052.48 | 0.39273 | 0.13393 | 2.93238 | 0.00336  | 0.01553  | 1041.03 | 874.89  | 814.515 | 1228.51 | 1138.4  | 1217.54 | Up   |
| Xcr1     | 275.31  | 1.36797 | 0.2137  | 6.40133 | 1.54E-10 | 3.98E-09 | 180.923 | 160.029 | 120.315 | 396.025 | 446.699 | 347.869 | Up   |
| Ccr1     | 916.111 | 1.68143 | 0.26686 | 6.30073 | 2.96E-10 | 7.21E-09 | 648.226 | 365.097 | 293.149 | 1441.04 | 1476.32 | 1272.84 | Up   |
| Ccr2     | 1829.5  | 0.58949 | 0.17986 | 3.27755 | 0.00105  | 0.00579  | 1391.27 | 1755.53 | 1235.62 | 1991.53 | 2628.45 | 1974.61 | Up   |
| Ccr5     | 708.321 | 2.03986 | 0.16323 | 12.4966 | 7.79E-36 | 2.58E-33 | 272.835 | 255.855 | 302.698 | 973.476 | 1131    | 1314.06 | Up   |
| 2010315B | 1521.81 | 0.35907 | 0.13743 | 2.61277 | 0.00898  | 0.03493  | 1321.61 | 1447.93 | 1230.84 | 1547.82 | 1623.11 | 1959.53 | Up   |
| H60c     | 313.712 | 0.8052  | 0.32987 | 2.44099 | 0.01465  | 0.05207  | 366.683 | 140.864 | 177.608 | 396.025 | 415.018 | 386.074 | Up   |
| Ppp1r14c | 7293.75 | 0.33643 | 0.10602 | 3.17341 | 0.00151  | 0.00787  | 6097.19 | 6823.76 | 6420.63 | 7618.82 | 7861.05 | 8941.03 | Up   |
| lyd      | 480.247 | -0.7004 | 0.32264 | -2.1708 | 0.02995  | 0.09172  | 525.353 | 552.915 | 705.658 | 387.732 | 189.029 | 520.798 | Down |
| Plekgh1  | 1982.58 | 0.82615 | 0.10441 | 7.91226 | 2.53E-15 | 1.33E-13 | 1515.11 | 1320.48 | 1454.29 | 2404.14 | 2611.55 | 2589.91 | Up   |
| Akap12   | 6806.32 | -0.5884 | 0.16141 | -3.6454 | 0.00027  | 0.00179  | 6341.97 | 8465.26 | 9718.8  | 5255.11 | 5566.31 | 5490.49 | Down |
| Gm21781  | 472.212 | -0.4113 | 0.13948 | -2.949  | 0.00319  | 0.01485  | 564.053 | 493.503 | 559.561 | 391.879 | 437.195 | 387.079 | Down |
| Armt1    | 902.261 | 0.28862 | 0.12018 | 2.40147 | 0.01633  | 0.0568   | 899.776 | 764.69  | 772.5   | 969.329 | 1016.95 | 990.32  | Up   |
| Esr1     | 254.123 | 0.43004 | 0.20093 | 2.14019 | 0.03234  | 0.09698  | 170.28  | 247.231 | 232.037 | 272.656 | 299.911 | 302.626 | Up   |
| Syne1    | 6935.89 | -0.4048 | 0.1101  | -3.6769 | 0.00024  | 0.0016   | 7256.26 | 7927.67 | 8524.24 | 5579.6  | 5858.83 | 6468.75 | Down |
| Ulbp1    | 342.335 | 0.92998 | 0.17516 | 5.30923 | 1.10E-07 | 1.62E-06 | 268.965 | 210.817 | 227.262 | 394.989 | 479.436 | 472.538 | Up   |
| Lrp11    | 467.702 | 0.6386  | 0.17171 | 3.71902 | 0.0002   | 0.00139  | 357.976 | 430.258 | 309.382 | 537.019 | 551.245 | 620.332 | Up   |
| Pcmt1    | 4993.39 | -0.2144 | 0.08086 | -2.6517 | 0.00801  | 0.03183  | 5368.67 | 5178.43 | 5544.05 | 4688.03 | 4694.03 | 4487.1  | Down |
| Zc3h12d  | 268.47  | 0.65899 | 0.19638 | 3.35562 | 0.00079  | 0.00458  | 253.485 | 184.944 | 186.202 | 303.758 | 351.656 | 330.777 | Up   |
| Ust      | 464.182 | -0.6547 | 0.21667 | -3.0216 | 0.00251  | 0.0121   | 635.648 | 497.336 | 570.065 | 439.568 | 378.057 | 264.42  | Down |
| Sash1    | 4968.92 | -0.3742 | 0.12071 | -3.1001 | 0.00193  | 0.0097   | 4943.93 | 5850.17 | 6034.86 | 4169.67 | 4708.82 | 4106.06 | Down |
| Adgb     | 2259.82 | -0.6247 | 0.20869 | -2.9936 | 0.00276  | 0.01309  | 2492.28 | 3151.71 | 2581.05 | 1925.18 | 1245.05 | 2163.62 | Down |
| Rab32    | 1477.82 | 1.59687 | 0.22215 | 7.18837 | 6.56E-13 | 2.43E-11 | 900.744 | 763.732 | 538.554 | 1949.03 | 2779.46 | 1935.4  | Up   |
| Grm1     | 34.9168 | -0.8077 | 1.05313 | -4.5651 | 4.99E-06 | 5.28E-05 | 15.48   | 169.612 | 17.1879 | 1.03672 | 3.16808 | 3.0162  | Down |
| Fbxo30   | 2535.61 | -0.5846 | 0.10829 | -5.3985 | 6.72E-08 | 1.03E-06 | 2935.4  | 3202.5  | 2989.74 | 2016.41 | 1860.72 | 2208.87 | Down |
| Epm2a    | 703.568 | -0.347  | 0.16192 | -2.1428 | 0.03213  | 0.09656  | 857.206 | 846.142 | 659.824 | 619.956 | 684.304 | 553.976 | Down |
| Utrn     | 8545.15 | -0.2635 | 0.08743 | -3.0138 | 0.00258  | 0.01238  | 9242.54 | 9025.84 | 9701.61 | 7318.18 | 8093.38 | 7889.38 | Down |
| Plagl1   | 1496.9  | -0.5261 | 0.12676 | -4.1499 | 3.33E-05 | 0.00029  | 1760.85 | 1657.79 | 1882.07 | 1288.64 | 1073.98 | 1318.08 | Down |
| Phactr2  | 5113.83 | -0.3693 | 0.10275 | -3.5938 | 0.00033  | 0.00213  | 6013.02 | 6037.99 | 5243.26 | 4220.47 | 4550.41 | 4617.81 | Down |
| Fuca2    | 6616.6  | 0.7821  | 0.09762 | 8.01142 | 1.13E-15 | 6.26E-14 | 4976.83 | 5198.55 | 4422.06 | 8228.41 | 8474.6  | 8399.12 | Up   |
| Pex3     | 2162.45 | 0.20293 | 0.08966 | 2.26328 | 0.02362  | 0.07614  | 1980.48 | 2117.75 | 1933.64 | 2288.03 | 2324.31 | 2330.52 | Up   |
| Aig1     | 3567.93 | 0.31764 | 0.08195 | 3.87612 | 0.00011  | 0.0008   | 3185.98 | 3263.83 | 3080.45 | 4059.78 | 3849.21 | 3968.32 | Up   |
| Adgrg6   | 3726.97 | -0.4167 | 0.11595 | -3.5935 | 0.00033  | 0.00213  | 3729.72 | 4449.19 | 4605.4  | 3325.78 | 3106.83 | 3144.89 | Down |
| Gm47712  | 13.5027 | -3.8823 | 0.97605 | -3.9776 | 6.96E-05 | 0.00055  | 25.155  | 37.3721 | 13.3684 | 3.11015 | 0       | 2.0108  | Down |
| Gm47770  | 11.7405 | 3.77214 | 1.00635 | 3.74833 | 0.00018  | 0.00126  | 2.9025  | 0.95826 | 0.95488 | 29.028  | 8.4482  | 28.1512 | Up   |
| Cited2   | 4869.48 | 0.84051 | 0.16843 | 4.9903  | 6.03E-07 | 7.84E-06 | 3376.58 | 3466.02 | 3626.65 | 6653.64 | 7361.55 | 4732.42 | Up   |
| Txlnb    | 719.206 | -4.8878 | 0.93445 | -5.2307 | 1.69E-07 | 2.42E-06 | 881.394 | 2843.15 | 449.75  | 20.7343 | 32.7368 | 87.4699 | Down |
| Abrac1   | 1580.53 | 0.39669 | 0.13837 | 2.86681 | 0.00415  | 0.01854  | 1249.04 | 1331.98 | 1512.53 | 1838.1  | 1981.1  | 1570.44 | Up   |
| Ccdc28a  | 749.152 | -0.3142 | 0.13944 | -2.2537 | 0.02422  | 0.07765  | 905.581 | 752.233 | 833.613 | 708.077 | 596.654 | 698.754 | Down |
| Hebp2    | 58.8236 | -1.0686 | 0.50907 | -2.0991 | 0.03581  | 0.10514  | 63.8551 | 130.323 | 44.8795 | 40.4319 | 22.1765 | 51.2754 | Down |
| Gm48297  | 3.09472 | 4.0922  | 1.79237 | 2.28312 | 0.02242  | 0.0729   |         |         |         |         |         |         |      |

|           |         |         |         |         |          |          |         |         |         |         |         |         |      |
|-----------|---------|---------|---------|---------|----------|----------|---------|---------|---------|---------|---------|---------|------|
| Ahi1      | 859.124 | -0.4294 | 0.14048 | -3.0566 | 0.00224  | 0.01094  | 921.061 | 939.093 | 1098.12 | 682.159 | 695.921 | 818.396 | Down |
| Myb       | 1257.45 | -0.4982 | 0.18105 | -2.7519 | 0.00593  | 0.02493  | 1411.58 | 1614.67 | 1391.26 | 1197.41 | 784.627 | 1145.15 | Down |
| 1700020N  | 3.09704 | 4.09246 | 1.71659 | 2.38406 | 0.01712  | 0.05903  | 0.9675  | 0       | 0       | 7.25701 | 6.33615 | 4.0216  | Up   |
| Sgk1      | 15790.1 | 0.56678 | 0.23423 | 2.41978 | 0.01553  | 0.05453  | 10642.5 | 14831   | 12709.5 | 21337.7 | 23149.1 | 12070.8 | Up   |
| E030030IC | 354.323 | 0.52104 | 0.17084 | 3.04993 | 0.00229  | 0.01116  | 316.373 | 253.939 | 302.698 | 390.842 | 470.987 | 391.101 | Up   |
| Gm10824   | 113.931 | -0.868  | 0.27092 | -3.204  | 0.00136  | 0.00721  | 137.385 | 144.697 | 159.465 | 103.672 | 76.0338 | 62.3349 | Down |
| Vnn3      | 1342.68 | 1.84311 | 0.52887 | 3.48502 | 0.00049  | 0.00306  | 724.659 | 564.414 | 466.938 | 2191.62 | 910.294 | 3198.18 | Up   |
| Vnn1      | 1732.73 | 1.63488 | 0.62851 | 2.60119 | 0.00929  | 0.03597  | 1380.62 | 557.707 | 593.937 | 2711.01 | 1224.99 | 3928.1  | Up   |
| Ccn2      | 9111.8  | -0.5742 | 0.24169 | -2.3756 | 0.01752  | 0.06007  | 12146   | 12582.9 | 7975.18 | 9841.54 | 6754.34 | 5370.85 | Down |
| Enpp1     | 815.344 | 0.32982 | 0.11999 | 2.74877 | 0.00598  | 0.0251   | 706.276 | 690.904 | 770.59  | 897.796 | 853.268 | 973.228 | Up   |
| Med23     | 2001.93 | 0.22184 | 0.09397 | 2.36079 | 0.01824  | 0.06211  | 1846.96 | 1816.86 | 1881.12 | 2022.63 | 2247.22 | 2196.8  | Up   |
| Arg1      | 148.041 | 0.90462 | 0.3241  | 2.79116 | 0.00525  | 0.02257  | 113.198 | 119.782 | 76.3906 | 180.389 | 133.059 | 265.426 | Up   |
| Epb41l2   | 10434.7 | -0.2475 | 0.09453 | -2.6185 | 0.00883  | 0.03449  | 11574.2 | 11173.3 | 11235.2 | 8919.9  | 10375.4 | 9330.12 | Down |
| Tmem200   | 414.157 | -0.3839 | 0.16694 | -2.2996 | 0.02147  | 0.07047  | 395.708 | 485.837 | 525.186 | 335.896 | 384.393 | 357.923 | Down |
| Lama2     | 2346.19 | -0.2892 | 0.09321 | -3.1023 | 0.00192  | 0.00963  | 2537.76 | 2555.68 | 2647.89 | 2147.04 | 2208.15 | 1980.64 | Down |
| 9330159F  | 218.775 | -1.9313 | 0.25381 | -7.6093 | 2.76E-14 | 1.27E-12 | 267.03  | 384.262 | 388.637 | 114.039 | 80.2579 | 78.4213 | Down |
| Echdc1    | 797.462 | 0.30774 | 0.13693 | 2.24738 | 0.02462  | 0.07869  | 718.854 | 637.242 | 782.049 | 808.638 | 946.199 | 891.791 | Up   |
| Hint3     | 443.467 | 0.49788 | 0.14826 | 3.35814 | 0.00078  | 0.00455  | 336.691 | 395.761 | 370.495 | 535.982 | 553.357 | 468.517 | Up   |
| Ncoa7     | 1935.76 | 0.81192 | 0.10998 | 7.38236 | 1.56E-13 | 6.45E-12 | 1477.37 | 1327.19 | 1410.36 | 2300.47 | 2680.19 | 2418.99 | Up   |
| Hey2      | 256.97  | -0.8001 | 0.31996 | -2.5007 | 0.0124   | 0.0456   | 224.46  | 380.429 | 374.314 | 156.544 | 270.342 | 135.729 | Down |
| Hddc2     | 468.671 | 0.35333 | 0.12808 | 2.75861 | 0.0058   | 0.02454  | 413.123 | 398.636 | 423.013 | 502.807 | 517.452 | 556.992 | Up   |
| Rnf217    | 1254.5  | -0.2543 | 0.10195 | -2.4947 | 0.0126   | 0.04619  | 1303.22 | 1349.23 | 1441.87 | 1188.08 | 1122.55 | 1122.03 | Down |
| Trdn      | 862.12  | -5.0314 | 0.75854 | -6.633  | 3.29E-11 | 9.42E-10 | 1000.4  | 3200.58 | 818.335 | 37.3218 | 30.6247 | 85.4591 | Down |
| Rsph4a    | 2515.75 | -0.586  | 0.22802 | -2.5702 | 0.01016  | 0.03872  | 2895.73 | 3306.95 | 2857.01 | 2028.85 | 1330.59 | 2675.37 | Down |
| Gm48018   | 41.7379 | -1.0767 | 0.43449 | -2.4782 | 0.01321  | 0.04794  | 43.5376 | 83.3685 | 42.9697 | 26.9546 | 27.4567 | 26.1404 | Down |
| A830082N  | 120.759 | -0.5312 | 0.26117 | -2.0341 | 0.04194  | 0.11898  | 156.735 | 129.365 | 142.278 | 98.488  | 76.0338 | 121.654 | Down |
| Dse       | 1748.33 | 0.42751 | 0.10921 | 3.91454 | 9.06E-05 | 0.0007   | 1384.49 | 1625.21 | 1463.84 | 1924.14 | 1999.06 | 2093.24 | Up   |
| Frk       | 1247.66 | 2.01347 | 0.13394 | 15.0324 | 4.51E-51 | 4.23E-48 | 542.768 | 522.251 | 421.103 | 1906.52 | 2062.42 | 2030.91 | Up   |
| Marcks    | 10053.5 | -0.398  | 0.11635 | -3.4209 | 0.00062  | 0.00374  | 9849.16 | 12145.9 | 12299.8 | 8801.72 | 8744.95 | 8479.55 | Down |
| Lama4     | 3991.22 | -0.7774 | 0.12668 | -6.1363 | 8.45E-10 | 1.88E-08 | 4403.1  | 5124.77 | 5595.61 | 2780.47 | 3186.03 | 2857.35 | Down |
| Fam229b   | 275.518 | -0.8391 | 0.19522 | -4.298  | 1.72E-05 | 0.00016  | 297.023 | 404.385 | 359.036 | 180.389 | 190.085 | 222.194 | Down |
| Fyn       | 2044.98 | -0.3433 | 0.12987 | -2.6437 | 0.0082   | 0.03246  | 2113.02 | 2093.8  | 2654.57 | 1790.41 | 1858.6  | 1759.45 | Down |
| Gm16364   | 308.842 | -0.8731 | 0.17111 | -5.1026 | 3.35E-07 | 4.58E-06 | 351.203 | 390.97  | 456.434 | 211.49  | 221.765 | 221.188 | Down |
| Rev3l     | 2457.46 | -0.2955 | 0.13355 | -2.2125 | 0.02694  | 0.08448  | 2455.52 | 2785.66 | 2883.75 | 2321.21 | 1898.73 | 2399.89 | Down |
| 4930547N  | 126.394 | -1.1021 | 0.27208 | -4.0506 | 5.11E-05 | 0.00042  | 153.833 | 216.566 | 147.052 | 74.6435 | 70.7537 | 95.5131 | Down |
| Mfsd4b5   | 132.193 | -1.3638 | 0.29062 | -4.6928 | 2.69E-06 | 3.02E-05 | 192.533 | 207.942 | 170.924 | 71.5334 | 50.6892 | 99.5347 | Down |
| Mfsd4b1   | 322.387 | -1.0108 | 0.21085 | -4.7938 | 1.64E-06 | 1.93E-05 | 375.391 | 505.961 | 411.555 | 230.151 | 168.964 | 242.302 | Down |
| Slc16a10  | 1171.06 | -0.3871 | 0.1778  | -2.177  | 0.02948  | 0.09071  | 1092.31 | 1527.46 | 1361.66 | 938.228 | 1202.81 | 903.855 | Down |
| Amd1      | 5308.64 | 0.3939  | 0.09032 | 4.36133 | 1.29E-05 | 0.00012  | 4672.06 | 4801.83 | 4291.24 | 6221.33 | 6032.02 | 5833.34 | Up   |
| Cdk19     | 6468.3  | 0.62197 | 0.15921 | 3.90662 | 9.36E-05 | 0.00072  | 5602.8  | 5259.88 | 4423.02 | 9440.33 | 6839.88 | 7243.91 | Up   |
| Ddo       | 2367.88 | -0.5577 | 0.1749  | -3.1887 | 0.00143  | 0.00753  | 2496.15 | 2892.98 | 3070.9  | 2110.75 | 1466.82 | 2169.66 | Down |
| Mettl24   | 606.827 | -0.5915 | 0.12228 | -4.8372 | 1.32E-06 | 1.58E-05 | 770.131 | 698.571 | 719.982 | 485.183 | 459.371 | 507.727 | Down |
| Fig4      | 2679.5  | 0.80723 | 0.16684 | 4.83834 | 1.31E-06 | 1.57E-05 | 2425.53 | 1827.4  | 1593.7  | 3212.78 | 3458.48 | 3559.12 | Up   |
| Ak9       | 1436.73 | -0.5689 | 0.24289 | -2.3421 | 0.01917  | 0.06458  | 1116.5  | 1967.31 | 2065.41 | 1250.28 | 921.91  | 1298.98 | Down |
| Mical1    | 1498.63 | 0.40801 | 0.16199 | 2.51867 | 0.01178  | 0.04371  | 1358.37 | 1137.45 | 1368.35 | 1610.02 | 2048.69 | 1468.89 | Up   |
| Ppil6     | 3195.29 | -0.4887 | 0.23988 | -2.0374 | 0.04161  | 0.11823  | 3235.32 | 4084.1  | 3874.91 | 2993    | 1648.46 | 3335.92 | Down |
| Cd164     | 26773.6 | 0.45221 | 0.1073  | 4.2146  | 2.50E-05 | 0.00022  | 22686.9 | 22651.3 | 22496.1 | 30494   | 34507.7 | 27805.4 | Up   |
| Sesn1     | 3142.01 | -0.6579 | 0.13764 | -4.7797 | 1.76E-06 | 2.05E-05 | 3307.89 | 4498.07 | 3732.64 | 2473.6  | 2514.4  | 2325.49 | Down |
| Arm2      | 896.403 | -0.5495 | 0.22807 | -2.4093 | 0.01598  | 0.05587  | 951.054 | 1198.78 | 1045.6  | 800.345 | 486.828 | 895.812 | Down |
| Afgl1     | 1449.94 | -0.2968 | 0.09462 | -3.1364 | 0.00171  | 0.00873  | 1561.55 | 1614.67 | 1619.48 | 1241.99 | 1313.7  | 1348.24 | Down |
| Ostm1     | 3290.79 | 0.45733 | 0.09739 | 4.69585 | 2.66E-06 | 2.98E-05 | 2854.13 | 2898.73 | 2567.68 | 3691.75 | 3983.33 | 3749.14 | Up   |
| Sobp      | 451.25  | 0.93008 | 0.20947 | 4.44023 | 8.99E-06 | 8.93E-05 | 247.68  | 408.218 | 275.961 | 582.634 | 599.822 | 593.187 | Up   |
| Pdss2     | 662.733 | -0.2765 | 0.13727 | -2.0143 | 0.04398  | 0.12343  | 680.154 | 764.69  | 733.35  | 528.725 | 621.999 | 647.478 | Down |
| Crybg1    | 553.215 | 0.37139 | 0.13817 | 2.688   | 0.00719  | 0.02913  | 508.906 | 489.67  | 448.795 | 628.25  | 566.03  | 677.64  | Up   |
| Atg5      | 2387.56 | 0.37106 | 0.09326 | 3.9786  | 6.93E-05 | 0.00055  | 2113.02 | 2091.88 | 2041.54 | 2667.47 | 2860.77 | 2550.7  | Up   |
| Gm48065   | 8.88423 | 3.04494 | 0.91207 | 3.3385  | 0.00084  | 0.00482  | 1.935   | 0.95826 | 2.86465 | 14.514  | 17.9524 | 15.081  | Up   |
| Prep      | 6417.42 | 0.50915 | 0.09012 | 5.64949 | 1.61E-08 | 2.80E-07 | 5663.75 | 5232.09 | 4994.04 | 7520.34 | 7722.71 | 7371.6  | Up   |
| Popdc3    | 857.21  | -0.3421 | 0.13721 | -2.4932 | 0.01266  | 0.04632  | 1062.32 | 888.306 | 924.327 | 758.876 | 824.756 | 684.678 | Down |
| Bves      | 195.958 | -4.4845 | 0.53265 | -8.4194 | 3.79E-17 | 2.57E-15 | 238.005 | 678.447 | 209.119 | 8.29373 | 13.7283 | 28.1512 | Down |
| Hace1     | 1332.98 | -0.3565 | 0.10851 | -3.2854 | 0.00102  | 0.00566  | 1501.56 | 1407.68 | 1581.29 | 1092.7  | 1209.15 | 1205.48 | Down |
| Gm46224   | 86.902  | 2.02478 | 0.34613 | 5.84984 | 4.92E-09 | 9.57E-08 | 44.5051 | 36.4138 | 21.9623 | 171.058 | 128.835 | 118.637 | Up   |
| Gm48786   | 13.9066 | 2.6349  | 1.02797 | 2.56322 | 0.01037  | 0.03939  | 9.67501 | 1.91652 | 0       | 13.4773 | 22.1765 | 36.1944 | Up   |
| Fam162b   | 326.672 | -0.941  | 0.27282 | -3.4492 | 0.00056  | 0.00342  | 320.243 | 368.93  | 599.666 | 202.16  | 199.589 | 269.447 | Down |
| Gprc6a    | 150.878 | -1.0704 | 0.22436 | -4.7709 | 1.83E-06 | 2.13E-05 | 180.923 | 205.067 | 227.262 | 81.9006 | 104.547 | 105.567 | Down |
| Ros1      | 73.4254 | 0.99876 | 0.31893 | 3.13164 | 0.00174  | 0.00886  | 51.2776 | 41.2051 | 54.4283 | 75.6803 | 121.443 | 96.5185 | Up   |
| Nus1      | 6962.49 | 0.76169 | 0.10337 | 7.36859 | 1.72E-13 | 7.04E-12 | 5239.99 | 5050.98 | 5206.98 | 8410.88 | 9713.32 | 8152.8  | Up   |
| Cep85l    | 2465.78 | -0.643  | 0.14276 | -4.5043 | 6.66E-06 | 6.84E-05 | 2481.64 | 3098.05 | 3439.49 | 1890.97 | 1880.78 | 2003.76 | Down |
| Man1a     | 5784.66 | 0.85198 | 0.13715 | 6.2122  | 5.22E-10 | 1.21E-08 | 4426.32 | 4311.21 | 3636.19 | 6501.25 | 8388.01 | 7444.99 | Up   |
| Gja1      | 10047.1 | 2.17553 | 0.15109 | 14.3991 | 5.24E-47 | 3.90E-44 | 3676.51 | 4255.63 | 2993.56 | 15101.8 | 18060.1 | 16195   | Up   |
| Gm40652   | 19.4576 | 1.30844 | 0.59074 | 2.21494 | 0.02676  | 0.08407  | 11.61   | 7.66607 | 14.3232 | 19.6976 | 23.2326 | 40.216  | Up   |
| Hsf2      | 1311.14 | -0.2158 | 0.09891 | -2.182  | 0.02911  | 0.08986  | 1379.66 | 1377.02 | 1470.52 | 1221.25 | 1161.63 | 1256.75 | Down |
| Pkib      | 416.452 | 1.06199 | 0.22802 | 4.6574  | 3.20E-06 | 3.54E-05 | 318.308 | 290.352 | 200.525 | 605.442 | 634.671 | 449.414 | Up   |
| Smpdl3a   | 9978.5  | 0.2834  | 0.12749 | 2.22295 | 0.02622  | 0.08272  | 10082.3 | 8886.89 | 8035.34 | 11056.6 | 11927.8 | 9882.09 | Up   |
| Gcc2      | 4332.85 | 0.32052 | 0.08762 | 3.65807 | 0.00025  | 0.00171  | 3870.97 | 3772.66 | 3916.93 | 4512.82 | 4979.16 | 4944.56 | Up   |
| Ccdc138   | 850.329 | -0.5046 | 0.19547 | -2.5815 | 0.00984  | 0.03769  | 904.614 | 1058.88 | 1029.36 | 727.775 | 582.733 | 858.612 | Down |
| Sowahc    | 3146.54 | 0.78159 | 0.11832 | 6.6055  | 3.96E-11 | 1.12E-09 | 2590    | 2192.5  | 2160.9  | 3756.02 | 4275.85 | 3903.97 | Up   |
| Pla2g12b  | 19.7705 | -1.3022 | 0.63945 | -2.0365 | 0.0417   | 0.1184   | 19.35</ |         |         |         |         |         |      |

|          |         |         |         |         |          |          |         |         |         |         |         |         |      |
|----------|---------|---------|---------|---------|----------|----------|---------|---------|---------|---------|---------|---------|------|
| Adamts14 | 276.509 | -0.8493 | 0.20499 | -4.1431 | 3.43E-05 | 0.00029  | 276.705 | 412.051 | 378.134 | 196.976 | 190.085 | 205.102 | Down |
| Prf1     | 226.848 | -0.6069 | 0.27972 | -2.1698 | 0.03002  | 0.09182  | 229.298 | 302.81  | 289.33  | 158.618 | 251.334 | 129.697 | Down |
| Ppa1     | 1784.22 | 0.49656 | 0.15672 | 3.16843 | 0.00153  | 0.00797  | 1220.02 | 1782.36 | 1438.05 | 1987.38 | 2128.95 | 2148.54 | Up   |
| Col13a1  | 3063.48 | -0.4322 | 0.16735 | -2.5826 | 0.0098   | 0.03759  | 3707.47 | 3439.19 | 3409.89 | 2753.52 | 3074.09 | 1996.73 | Down |
| Gm5424   | 543.674 | -0.6738 | 0.13451 | -5.0091 | 5.47E-07 | 7.15E-06 | 621.136 | 648.741 | 735.26  | 403.282 | 420.298 | 433.328 | Down |
| HK1      | 5085.41 | 0.25892 | 0.12545 | 2.06404 | 0.03901  | 0.11232  | 4211.53 | 5287.67 | 4391.51 | 5322.5  | 5988.72 | 5310.53 | Up   |
| Hkdc1    | 1130.19 | 1.9779  | 0.18574 | 10.6487 | 1.77E-26 | 2.72E-24 | 502.133 | 533.75  | 337.074 | 1733.39 | 1951.53 | 1723.26 | Up   |
| Vps26a   | 5227.41 | 0.33692 | 0.1204  | 2.79837 | 0.00514  | 0.0222   | 5286.43 | 4333.25 | 4239.68 | 5723.71 | 6126    | 5655.38 | Up   |
| Srgn     | 9973.9  | -0.3041 | 0.11428 | -2.6606 | 0.0078   | 0.03113  | 10090.1 | 11979.2 | 10993.6 | 8880.51 | 9708.04 | 8192.01 | Down |
| Stox1    | 469.826 | -0.3665 | 0.15585 | -2.3516 | 0.01869  | 0.06337  | 503.101 | 504.044 | 580.569 | 414.686 | 360.105 | 456.452 | Down |
| Slc25a16 | 2841.34 | 0.30253 | 0.11271 | 2.68414 | 0.00727  | 0.02942  | 2755.44 | 2615.09 | 2263.07 | 3003.37 | 3243.05 | 3168.02 | Up   |
| Pbld2    | 718.97  | 2.481   | 0.24967 | 9.93728 | 2.87E-23 | 3.25E-21 | 254.453 | 210.817 | 190.022 | 1090.63 | 1680.14 | 887.769 | Up   |
| Pbld1    | 91.2045 | 1.09132 | 0.33031 | 3.30388 | 0.00095  | 0.00536  | 53.2126 | 68.0364 | 53.4734 | 126.479 | 161.572 | 84.4537 | Up   |
| Mypn     | 267.932 | -4.4071 | 0.98546 | -4.4721 | 7.75E-06 | 7.84E-05 | 240.908 | 959.217 | 335.164 | 23.8445 | 4.2241  | 44.2376 | Down |
| Sirt1    | 2573.06 | -0.294  | 0.09563 | -3.0745 | 0.00211  | 0.01041  | 2866.71 | 2671.63 | 2964.91 | 2292.18 | 2222.93 | 2420    | Down |
| Dnajc12  | 1139.94 | -0.4196 | 0.13581 | -3.0896 | 0.002    | 0.00999  | 1414.49 | 1219.86 | 1279.54 | 1020.13 | 846.932 | 1058.69 | Down |
| Gm32255  | 3.40591 | 3.27139 | 1.62096 | 2.01818 | 0.04357  | 0.12257  | 0       | 1.91652 | 0       | 7.25701 | 4.2241  | 7.03781 | Up   |
| Egr2     | 660.307 | 1.75363 | 0.32663 | 5.36886 | 7.92E-08 | 1.20E-06 | 337.658 | 360.305 | 208.164 | 935.118 | 1514.34 | 606.257 | Up   |
| Rtnk2    | 16974.3 | -0.4794 | 0.11232 | -4.2682 | 1.97E-05 | 0.00018  | 20276.9 | 17605.1 | 21424.7 | 14990.9 | 13253.1 | 14294.8 | Down |
| Arid5b   | 6761.23 | -0.3233 | 0.08895 | -3.6345 | 0.00028  | 0.00186  | 7065.66 | 7793.52 | 7687.76 | 5960.08 | 5800.75 | 6259.63 | Down |
| Cabcoco1 | 469.978 | -0.855  | 0.33078 | -2.5848 | 0.00974  | 0.03739  | 445.051 | 759.899 | 611.125 | 360.777 | 179.524 | 463.49  | Down |
| Rhobtb1  | 1170.19 | -0.6843 | 0.18749 | -3.6498 | 0.00026  | 0.00176  | 1515.11 | 1616.58 | 1196.47 | 793.088 | 790.963 | 1108.96 | Down |
| Cdk1     | 312.949 | 1.23512 | 0.33725 | 3.66237 | 0.00025  | 0.00168  | 172.215 | 268.312 | 119.36  | 506.954 | 283.015 | 527.835 | Up   |
| Ank3     | 5448.7  | 0.66037 | 0.13874 | 4.75965 | 1.94E-06 | 2.24E-05 | 3567.18 | 4826.75 | 4275.01 | 6115.59 | 7045.8  | 6861.86 | Up   |
| Slc16a9  | 1845.93 | -0.6182 | 0.12928 | -4.7821 | 1.73E-06 | 2.03E-05 | 2257.18 | 1986.47 | 2462.64 | 1431.7  | 1589.32 | 1348.24 | Down |
| Phyhip1  | 55.637  | -0.8017 | 0.31654 | -2.5327 | 0.01132  | 0.04231  | 67.7251 | 68.9946 | 75.4357 | 46.6522 | 33.7928 | 41.2214 | Down |
| Bicc1    | 260.166 | 0.64615 | 0.27065 | 2.38743 | 0.01697  | 0.05866  | 282.51  | 160.029 | 166.15  | 299.611 | 276.679 | 376.02  | Up   |
| Cisd1    | 2372.01 | -0.453  | 0.14733 | -3.0746 | 0.00211  | 0.01041  | 2548.4  | 3235.08 | 2440.68 | 2151.19 | 1803.69 | 2053.03 | Down |
| Ipkm     | 3235.42 | 0.27568 | 0.09241 | 2.98339 | 0.00285  | 0.01347  | 2934.43 | 2833.57 | 3013.61 | 3339.26 | 3743.61 | 3548.06 | Up   |
| Rsph14   | 582.233 | -0.7661 | 0.23797 | -3.2195 | 0.00128  | 0.00689  | 643.388 | 876.807 | 679.877 | 476.889 | 294.631 | 521.803 | Down |
| Rab36    | 1523.79 | -0.6031 | 0.17037 | -3.5399 | 0.0004   | 0.00255  | 1739.57 | 1928.97 | 1844.83 | 1361.21 | 921.91  | 1346.23 | Down |
| Bcr      | 5170.46 | 0.25324 | 0.10052 | 2.51921 | 0.01176  | 0.04366  | 5075.51 | 4296.83 | 4781.1  | 5739.26 | 5688.81 | 5441.23 | Up   |
| Specc1   | 7813.38 | -0.5254 | 0.07987 | -6.5782 | 4.76E-11 | 1.33E-09 | 8896.18 | 9469.51 | 9295.78 | 6387.21 | 6620.22 | 6211.37 | Down |
| Snprd3   | 1760.28 | -0.328  | 0.11725 | -2.7976 | 0.00515  | 0.02224  | 1841.16 | 1891.6  | 2145.62 | 1513.61 | 1691.75 | 1477.94 | Down |
| Lrrc75b  | 83.2509 | -1.2673 | 0.33508 | -3.7822 | 0.00016  | 0.00112  | 163.508 | 97.7424 | 91.6688 | 47.6889 | 49.6332 | 49.2646 | Down |
| Ggt5     | 987.288 | 1.10262 | 0.1828  | 6.03198 | 1.62E-09 | 3.43E-08 | 741.106 | 502.128 | 638.817 | 1212.96 | 1562.92 | 1265.8  | Up   |
| Cabin1   | 4321.51 | 0.21319 | 0.10399 | 2.05018 | 0.04035  | 0.11531  | 3929.99 | 3756.37 | 4321.8  | 4623.75 | 4932.69 | 4364.45 | Up   |
| Gstt3    | 111.583 | 0.53278 | 0.23636 | 2.25412 | 0.02419  | 0.07758  | 95.7826 | 83.3685 | 94.5334 | 143.067 | 112.995 | 139.751 | Up   |
| Gstt1    | 6032.99 | 0.27881 | 0.09615 | 2.89971 | 0.00374  | 0.01695  | 5892.08 | 5157.35 | 5306.28 | 6577.96 | 6376.28 | 6888    | Up   |
| Gstt2    | 2149.51 | 0.58679 | 0.17261 | 3.39954 | 0.00067  | 0.004    | 2084.97 | 1608.92 | 1460.97 | 2745.22 | 2813.25 | 2183.73 | Up   |
| Derl3    | 133.417 | 0.79952 | 0.29627 | 2.69867 | 0.00696  | 0.0284   | 121.905 | 64.2033 | 105.992 | 196.976 | 162.628 | 148.799 | Up   |
| S100b    | 32.9317 | 1.31823 | 0.5769  | 2.28504 | 0.02231  | 0.07269  | 13.545  | 21.0817 | 21.9623 | 31.1015 | 27.4567 | 82.4429 | Up   |
| Pcnt     | 5436.91 | 0.47894 | 0.11853 | 4.04058 | 5.33E-05 | 0.00043  | 5131.63 | 4277.67 | 4218.67 | 5972.52 | 6754.34 | 6266.66 | Up   |
| Ybey     | 334.714 | -0.3358 | 0.15117 | -2.2213 | 0.02633  | 0.08303  | 357.976 | 370.846 | 391.502 | 305.831 | 314.696 | 267.437 | Down |
| Lss      | 289.967 | 1.7945  | 0.23502 | 7.63564 | 2.25E-14 | 1.04E-12 | 170.28  | 125.532 | 93.5785 | 422.98  | 449.867 | 477.565 | Up   |
| Col6a2   | 9962.44 | 0.82108 | 0.13543 | 6.06274 | 1.34E-09 | 2.90E-08 | 8034.13 | 6451    | 7119.61 | 13784.2 | 13395.7 | 10990   | Up   |
| Col6a1   | 17000.1 | 1.03862 | 0.14198 | 7.3153  | 2.57E-13 | 1.02E-11 | 13193.8 | 9738.78 | 10463.6 | 24789.9 | 22691.9 | 21122.5 | Up   |
| Pcbp3    | 1391.7  | -0.5459 | 0.1416  | -3.8552 | 0.00012  | 0.00086  | 1585.73 | 1581.13 | 1788.5  | 1146.61 | 1282.01 | 966.19  | Down |
| Itgb2    | 8262.12 | 2.02238 | 0.25667 | 7.87939 | 3.29E-15 | 1.70E-13 | 4435.03 | 3033.85 | 2323.23 | 11896.3 | 17543.7 | 10340.5 | Up   |
| Tspear   | 9.0824  | -1.9266 | 0.92835 | -2.0753 | 0.03796  | 0.10999  | 6.77251 | 24.9147 | 11.4586 | 6.2203  | 2.11205 | 3.0162  | Down |
| 1700009J | 6.80113 | 2.60198 | 1.08969 | 2.38783 | 0.01695  | 0.05861  | 3.87001 | 0       | 1.90977 | 14.514  | 8.4482  | 12.0648 | Up   |
| Lrrc3    | 54.2607 | 0.82857 | 0.3817  | 2.17073 | 0.02995  | 0.09172  | 50.3101 | 28.7478 | 38.1953 | 65.3131 | 88.7061 | 54.2916 | Up   |
| Gatd3a   | 1860.05 | -0.5516 | 0.17148 | -3.2169 | 0.0013   | 0.00695  | 2077.23 | 2763.62 | 1793.27 | 1576.84 | 1778.44 | 1470.9  | Down |
| Trappc10 | 3689.22 | 0.21782 | 0.09786 | 2.22573 | 0.02603  | 0.08223  | 3562.34 | 3491.89 | 3179.76 | 3917.75 | 3790.08 | 4193.53 | Up   |
| Gm30122  | 252.142 | -0.5477 | 0.17153 | -3.1931 | 0.00141  | 0.00743  | 269.933 | 313.351 | 315.111 | 201.123 | 191.141 | 222.194 | Down |
| Cstb     | 3612.78 | 1.00941 | 0.10434 | 9.67443 | 3.87E-22 | 4.07E-20 | 2520.34 | 2313.24 | 2360.47 | 4858.05 | 5198.81 | 4425.77 | Up   |
| Syde1    | 3900.72 | -0.2934 | 0.11968 | -2.4519 | 0.01421  | 0.05089  | 4069.31 | 3909.7  | 4909.05 | 3434.64 | 3620.05 | 3461.6  | Down |
| Plpp2    | 1599.23 | 0.59536 | 0.13432 | 4.43231 | 9.32E-06 | 9.22E-05 | 1336.12 | 1272.57 | 1212.7  | 1965.61 | 2158.52 | 1649.86 | Up   |
| Mier2    | 1129.85 | -0.3246 | 0.11847 | -2.7399 | 0.00615  | 0.02567  | 1226.79 | 1247.65 | 1294.82 | 1114.47 | 926.134 | 969.206 | Down |
| Bsg      | 37649   | 0.43041 | 0.09373 | 4.59218 | 4.39E-06 | 4.70E-05 | 31192.2 | 34223.2 | 30807.4 | 45690.1 | 40729.8 | 43251.3 | Up   |
| Hcn2     | 132.108 | 0.93082 | 0.35423 | 2.62773 | 0.0086   | 0.03372  | 79.3351 | 132.24  | 61.1125 | 211.49  | 184.804 | 123.664 | Up   |
| Polrmt   | 1166.74 | -0.2366 | 0.09751 | -2.4262 | 0.01526  | 0.05379  | 1306.13 | 1236.15 | 1244.21 | 1064.71 | 1105.66 | 1043.61 | Down |
| Palm     | 1527.35 | -0.5055 | 0.18228 | -2.773  | 0.00555  | 0.02368  | 1821.81 | 1757.45 | 1797.09 | 1351.88 | 1505.89 | 929.996 | Down |
| Misp     | 966.015 | 0.90343 | 0.18227 | 4.9565  | 7.18E-07 | 9.18E-06 | 551.476 | 831.769 | 635.952 | 1359.13 | 1106.71 | 1311.04 | Up   |
| Ptbp1    | 2027    | 0.42031 | 0.12159 | 3.45675 | 0.00055  | 0.00334  | 1882.76 | 1509.26 | 1809.5  | 2310.84 | 2236.66 | 2412.96 | Up   |
| Plppr3   | 287.794 | 0.73024 | 0.20827 | 3.5062  | 0.00045  | 0.00286  | 258.323 | 194.527 | 196.706 | 318.272 | 332.648 | 426.29  | Up   |
| Gm19810  | 8.10598 | -2.2987 | 1.1256  | -2.0422 | 0.04113  | 0.1171   | 24.1875 | 5.74955 | 10.5037 | 0       | 3.16808 | 5.027   | Down |
| Cfd      | 1100.29 | -6.8032 | 0.96822 | -7.0265 | 2.12E-12 | 7.23E-11 | 1466.73 | 3308.87 | 1767.49 | 20.7343 | 35.9049 | 2.0108  | Down |
| R3hdm4   | 3642.37 | 0.46815 | 0.09125 | 5.13036 | 2.89E-07 | 4.00E-06 | 3181.14 | 3079.84 | 2908.57 | 4417.45 | 4232.55 | 4034.67 | Up   |
| Arid3a   | 557.586 | 0.48224 | 0.1641  | 2.93871 | 0.0033   | 0.01525  | 431.506 | 453.256 | 510.862 | 571.23  | 760.338 | 618.322 | Up   |
| Cnn2     | 19190.9 | 0.22166 | 0.10914 | 2.03097 | 0.04226  | 0.11964  | 17907.5 | 16912.3 | 18338.5 | 20698   | 22784.8 | 18504.4 | Up   |
| Abca7    | 3805.32 | 0.52561 | 0.11215 | 4.68655 | 2.78E-06 | 3.11E-05 | 3005.06 | 2985.93 | 3367.87 | 4552.22 | 4842.93 | 4077.91 | Up   |
| Sbno2    | 5738.83 | 0.79151 | 0.12684 | 6.24025 | 4.37E-10 | 1.03E-08 | 3726.82 | 4175.13 | 4706.62 | 6786.34 | 7976.16 | 7061.94 | Up   |
| Cbarp    | 1069.72 | -0.8263 | 0.15456 | -5.346  | 8.99E-08 | 1.34E-06 | 1421.62 | 1156.62 | 1525.9  | 687.343 | 849.044 | 778.18  | Down |
| Cirbp    | 3475.41 | -0.3546 | 0.10759 | -3.2955 | 0.00098  | 0.0055   | 3661.99 | 3944.19 | 4094.54 | 2993    | 3327.54 | 2831.21 | Down |
| Ndufs7   | 3246.55 | -0.4929 | 0.15322 | -3.2167 | 0.0013   | 0.00695  | 3196.62 | 4474.11 | 3716.4  | 2904.88 | 2777.35 | 2409.95 | Down |
| Rps15    | 20687.7 | -0.2752 | 0.12844 | -2.1427 | 0.03214  | 0.09657  | 23508.4 | 19483.3 | 24973.1 |         |         |         |      |

|           |         |         |         |         |          |          |         |         |         |         |         |         |      |
|-----------|---------|---------|---------|---------|----------|----------|---------|---------|---------|---------|---------|---------|------|
| Mob3a     | 2407.62 | 0.29913 | 0.09268 | 3.22768 | 0.00125  | 0.00673  | 2200.1  | 2046.84 | 2229.65 | 2683.02 | 2741.44 | 2544.67 | Up   |
| Izumo4    | 1383.18 | -0.5043 | 0.147   | -3.4307 | 0.0006   | 0.00362  | 1335.15 | 1694.2  | 1838.15 | 1123.8  | 1119.39 | 1188.38 | Down |
| Ap3d1     | 8015.89 | 0.21833 | 0.08913 | 2.44974 | 0.0143   | 0.05111  | 7437.18 | 7070.99 | 7723.09 | 8887.76 | 8852.66 | 8123.64 | Up   |
| Lingo3    | 7.24397 | -3.2406 | 1.23472 | -2.6246 | 0.00868  | 0.03397  | 3.87001 | 22.0399 | 13.3684 | 2.07343 | 2.11205 | 0       | Down |
| Lsm7      | 757.862 | -0.4509 | 0.16362 | -2.7555 | 0.00586  | 0.02473  | 819.474 | 752.233 | 1054.19 | 619.956 | 677.968 | 623.349 | Down |
| Gng7      | 228.981 | -0.4255 | 0.16912 | -2.5162 | 0.01186  | 0.04396  | 272.835 | 276.937 | 237.766 | 190.756 | 198.533 | 197.059 | Down |
| Thop1     | 1241.82 | -0.2502 | 0.12315 | -2.0314 | 0.04221  | 0.11956  | 1323.54 | 1331.02 | 1393.17 | 1259.61 | 1007.45 | 1136.1  | Down |
| Atcayos   | 17.3466 | -3.7394 | 0.97041 | -3.8534 | 0.00012  | 0.00087  | 10.6425 | 64.2033 | 21.9623 | 1.03672 | 4.2241  | 2.0108  | Down |
| Zfr2      | 396.825 | -0.5232 | 0.15906 | -3.2896 | 0.001    | 0.0056   | 500.198 | 472.422 | 431.607 | 325.529 | 287.239 | 363.955 | Down |
| Matk      | 142.022 | 0.54976 | 0.23771 | 2.31268 | 0.02074  | 0.06859  | 137.385 | 107.325 | 101.218 | 187.646 | 143.619 | 174.94  | Up   |
| Tjp3      | 4392.96 | 1.60065 | 0.17572 | 9.10889 | 8.32E-20 | 7.07E-18 | 1614.76 | 2580.59 | 2340.42 | 6981.24 | 6371    | 6469.75 | Up   |
| Mfsd12    | 482.274 | 1.13351 | 0.17511 | 6.47297 | 9.61E-11 | 2.56E-09 | 337.658 | 302.81  | 265.457 | 668.682 | 754.002 | 565.035 | Up   |
| Gm48551   | 51.2835 | -1.007  | 0.3294  | -3.057  | 0.00224  | 0.01093  | 68.6926 | 59.412  | 77.3455 | 36.2851 | 33.7928 | 32.1728 | Down |
| Smim24    | 232.286 | 0.64376 | 0.24913 | 2.58402 | 0.00977  | 0.03745  | 216.72  | 194.527 | 132.729 | 332.786 | 234.438 | 282.518 | Up   |
| Celf5     | 39.3914 | 1.66151 | 0.49426 | 3.3616  | 0.00077  | 0.0045   | 31.9275 | 12.4574 | 12.4135 | 48.7256 | 65.4736 | 65.3511 | Up   |
| Ncln      | 4722.08 | 0.32254 | 0.11719 | 2.75237 | 0.00592  | 0.02491  | 4249.27 | 4003.6  | 4336.12 | 5137.96 | 5905.29 | 4700.25 | Up   |
| S1pr4     | 738.34  | -0.5981 | 0.18701 | -3.1981 | 0.00138  | 0.00733  | 834.954 | 825.061 | 1007.4  | 546.349 | 728.658 | 487.619 | Down |
| Gna15     | 400.041 | 1.19637 | 0.19435 | 6.15581 | 7.47E-10 | 1.68E-08 | 274.77  | 223.274 | 231.082 | 578.487 | 645.231 | 447.403 | Up   |
| Tle2      | 3960.2  | 0.46011 | 0.08728 | 5.27169 | 1.35E-07 | 1.96E-06 | 3174.37 | 3295.45 | 3532.11 | 4628.94 | 4514.51 | 4615.8  | Up   |
| Tle6      | 1186.36 | 1.03929 | 0.13687 | 7.59334 | 3.12E-14 | 1.43E-12 | 754.651 | 734.026 | 841.252 | 1436.89 | 1537.57 | 1813.74 | Up   |
| BC024063  | 120.934 | 0.45248 | 0.21226 | 2.13172 | 0.03303  | 0.09864  | 109.328 | 95.8259 | 101.218 | 140.993 | 141.507 | 136.735 | Up   |
| 11900071C | 519.883 | -0.4067 | 0.12152 | -3.3465 | 0.00082  | 0.0047   | 582.436 | 586.454 | 609.215 | 432.311 | 440.363 | 468.517 | Down |
| Txnrd1    | 9366.49 | 0.41623 | 0.16688 | 2.49411 | 0.01263  | 0.04625  | 10194.6 | 6835.26 | 7044.17 | 10221   | 11017.5 | 10886.5 | Up   |
| Chst11    | 1090.89 | -0.3077 | 0.13142 | -2.3414 | 0.01921  | 0.06467  | 1167.77 | 1143.2  | 1309.14 | 949.632 | 1089.82 | 885.758 | Down |
| Slc41a2   | 1323.39 | 1.29734 | 0.15143 | 8.56709 | 1.06E-17 | 7.79E-16 | 654.031 | 753.191 | 888.996 | 1826.69 | 2074.03 | 1743.37 | Up   |
| D10Wsu1f  | 1253.01 | 0.24026 | 0.1019  | 2.35777 | 0.01839  | 0.06252  | 1220.02 | 1093.37 | 1133.45 | 1323.89 | 1353.82 | 1393.49 | Up   |
| Washc4    | 2752.43 | 0.31559 | 0.10166 | 3.10424 | 0.00191  | 0.00958  | 2569.68 | 2299.82 | 2488.42 | 2962.93 | 2924.13 | 3269.56 | Up   |
| Nuak1     | 1448.78 | -0.3655 | 0.13182 | -2.7728 | 0.00556  | 0.02369  | 1438.67 | 1706.66 | 1748.39 | 1314.56 | 1343.26 | 1141.13 | Down |
| Ckap4     | 2695.8  | 0.27598 | 0.10023 | 2.75364 | 0.00589  | 0.02482  | 2297.82 | 2504.89 | 2513.25 | 3001.29 | 3105.77 | 2751.78 | Up   |
| Tcp11i2   | 5406.08 | -0.2582 | 0.11253 | -2.2944 | 0.02177  | 0.07128  | 5270.95 | 6578.45 | 5816.19 | 4966.91 | 4789.08 | 5014.94 | Down |
| Polr3b    | 2116.33 | 0.51221 | 0.09768 | 5.24372 | 1.57E-07 | 2.26E-06 | 1738.6  | 1644.37 | 1850.56 | 2404.14 | 2581.98 | 2478.31 | Up   |
| Rfx4      | 47.7209 | 2.41938 | 0.80802 | 2.9942  | 0.00275  | 0.01307  | 5.80501 | 37.3721 | 1.90977 | 60.1295 | 107.715 | 73.3943 | Up   |
| Btbd11    | 391.778 | 0.75836 | 0.20348 | 3.72687 | 0.00019  | 0.00136  | 350.236 | 260.646 | 262.593 | 540.129 | 399.178 | 537.889 | Up   |
| Pwp1      | 1515.97 | -0.3214 | 0.10177 | -3.1578 | 0.00159  | 0.00822  | 1708.61 | 1573.46 | 1770.35 | 1387.13 | 1299.97 | 1356.29 | Down |
| Bpifc     | 5.9834  | -2.262  | 1.0487  | -2.1569 | 0.03101  | 0.09408  | 5.80501 | 7.66607 | 16.233  | 2.07343 | 2.11205 | 2.0108  | Down |
| Syn3      | 257.124 | -0.4214 | 0.17227 | -2.4464 | 0.01443  | 0.05146  | 299.925 | 284.603 | 298.878 | 207.343 | 200.645 | 251.35  | Down |
| 1810014B  | 250.313 | -0.5501 | 0.24624 | -2.2338 | 0.02549  | 0.08092  | 324.113 | 342.098 | 226.307 | 220.82  | 156.292 | 232.248 | Down |
| Hsp90b1   | 11037.8 | 0.47225 | 0.13848 | 3.41011 | 0.00065  | 0.00387  | 9435.07 | 8030.21 | 10276.4 | 11530.4 | 12453.7 | 14500.9 | Up   |
| Nt5dc3    | 1463.19 | -0.4044 | 0.11141 | -3.6298 | 0.00028  | 0.00189  | 1571.22 | 1794.82 | 1634.76 | 1172.53 | 1296.8  | 1309.03 | Down |
| Stab2     | 16.8071 | 1.68176 | 0.66081 | 2.54502 | 0.01093  | 0.04113  | 5.80501 | 7.66607 | 10.5037 | 16.5875 | 20.0645 | 40.216  | Up   |
| 1700113H  | 11.8637 | -1.615  | 0.78143 | -2.0667 | 0.03876  | 0.11177  | 7.74001 | 26.8312 | 19.0977 | 7.25701 | 4.2241  | 6.03241 | Down |
| Ascl1     | 81.4801 | -2.5726 | 0.40162 | -6.4057 | 1.50E-10 | 3.88E-09 | 108.36  | 205.067 | 105.037 | 25.9179 | 26.4006 | 18.0972 | Down |
| Parpbp    | 35.0411 | 0.91181 | 0.39189 | 2.32672 | 0.01998  | 0.06676  | 22.2525 | 29.706  | 21.0074 | 42.5053 | 47.5211 | 47.2538 | Up   |
| Dram1     | 29907   | 1.30652 | 0.14242 | 9.17384 | 4.56E-20 | 4.00E-18 | 20357.2 | 14179.4 | 17124.9 | 41787.9 | 42908.4 | 43084.4 | Up   |
| Gnptab    | 2269.75 | 1.49403 | 0.15591 | 9.5829  | 9.44E-22 | 9.65E-20 | 1376.75 | 1087.62 | 1103.84 | 2859.26 | 3384.56 | 3806.45 | Up   |
| Chpt1     | 7871.92 | -0.3647 | 0.15399 | -2.3685 | 0.01786  | 0.06108  | 8880.7  | 10555.2 | 7149.21 | 6513.69 | 6853.6  | 7279.1  | Down |
| Spic      | 62.928  | 1.6696  | 0.42321 | 3.94506 | 7.98E-05 | 0.00062  | 36.7651 | 33.5391 | 20.0525 | 88.1208 | 63.3615 | 135.729 | Up   |
| Arl1      | 9438.62 | 0.21765 | 0.07097 | 3.06676 | 0.00216  | 0.01065  | 8857.48 | 8735.49 | 8591.08 | 10308.1 | 10075.5 | 10064.1 | Up   |
| Ano4      | 24.7214 | -3.9112 | 0.77686 | -5.0347 | 4.79E-07 | 6.32E-06 | 30.96   | 77.619  | 30.5563 | 3.11015 | 1.05603 | 5.027   | Down |
| Gas2l3    | 177.136 | 1.78361 | 0.22156 | 8.05029 | 8.26E-16 | 4.65E-14 | 87.0751 | 82.4102 | 69.7065 | 277.84  | 311.527 | 234.258 | Up   |
| Nr1h4     | 26.5442 | 1.00981 | 0.48544 | 2.08019 | 0.03751  | 0.10896  | 20.3175 | 19.1652 | 13.3684 | 47.6889 | 29.5687 | 29.1566 | Up   |
| Scyl2     | 2949.02 | 0.45225 | 0.09329 | 4.84794 | 1.25E-06 | 1.50E-05 | 2627.73 | 2394.69 | 2449.27 | 3236.63 | 3487    | 3498.8  | Up   |
| 1500026H  | 27.7436 | -0.9449 | 0.44298 | -2.1331 | 0.03292  | 0.09839  | 40.6351 | 37.3721 | 31.5111 | 17.6242 | 23.2326 | 16.0864 | Down |
| Actr6     | 908.398 | -0.3148 | 0.11059 | -2.8463 | 0.00442  | 0.01955  | 1042    | 996.589 | 982.574 | 795.161 | 865.941 | 768.126 | Down |
| Uhrf1bp1l | 5440.04 | 0.54694 | 0.09823 | 5.56814 | 2.57E-08 | 4.30E-07 | 4658.52 | 4437.7  | 4167.11 | 6212    | 6232.66 | 6932.24 | Up   |
| Apaf1     | 1820.6  | 0.51993 | 0.13841 | 3.75641 | 0.00017  | 0.00123  | 1697.97 | 1329.1  | 1460.97 | 2093.13 | 2371.83 | 1970.59 | Up   |
| Ikbip     | 1404.61 | -0.2448 | 0.11349 | -2.1568 | 0.03102  | 0.09408  | 1604.12 | 1453.68 | 1512.53 | 1398.53 | 1270.4  | 1188.38 | Down |
| Slc25a3   | 22582.5 | -0.2453 | 0.12377 | -1.9822 | 0.04745  | 0.13103  | 22498.3 | 28318.5 | 22677.5 | 21166.6 | 21393   | 19441.4 | Down |
| Tmpo      | 7870.99 | -0.2872 | 0.08214 | -3.4958 | 0.00047  | 0.00296  | 8563.36 | 8284.15 | 9107.67 | 7223.84 | 7035.24 | 7011.67 | Down |
| Nedd1     | 1453.56 | -0.241  | 0.1036  | -2.3267 | 0.01998  | 0.06676  | 1489.95 | 1633.83 | 1600.38 | 1256.5  | 1341.15 | 1399.52 | Down |
| Cfap54    | 1857.31 | -0.5095 | 0.24787 | -2.0557 | 0.03981  | 0.11407  | 1979.51 | 2514.47 | 2052.04 | 1554.04 | 973.655 | 2070.12 | Down |
| Cdk17     | 3788.52 | -0.2357 | 0.10725 | -2.1975 | 0.02798  | 0.08713  | 3775.19 | 4048.64 | 4467.9  | 3304.01 | 3670.74 | 3464.61 | Down |
| Elk3      | 615.497 | -0.3403 | 0.14665 | -2.3205 | 0.02031  | 0.06752  | 595.981 | 699.529 | 767.726 | 511.101 | 558.637 | 560.008 | Down |
| Amdhd1    | 20.8209 | -1.9223 | 0.88247 | -2.1783 | 0.02939  | 0.09049  | 22.2525 | 43.1216 | 33.4209 | 14.514  | 11.6163 | 0       | Down |
| Ntn4      | 4828.77 | -0.5185 | 0.1251  | -4.1445 | 3.40E-05 | 0.00029  | 5911.43 | 4893.83 | 6256.39 | 3810.97 | 4226.21 | 3873.81 | Down |
| Gm3571    | 565.021 | 1.86815 | 0.14623 | 12.7751 | 2.26E-37 | 8.86E-35 | 249.615 | 261.605 | 217.713 | 851.144 | 971.543 | 838.504 | Up   |
| Fgd6      | 2106.52 | 0.57344 | 0.12669 | 4.52636 | 6.00E-06 | 6.23E-05 | 1937.91 | 1519.8  | 1622.35 | 2492.26 | 2424.63 | 2642.19 | Up   |
| Ndufa12   | 1836.14 | -0.313  | 0.14014 | -2.2337 | 0.0255   | 0.08092  | 1773.43 | 2385.11 | 1945.1  | 1717.84 | 1618.89 | 1576.47 | Down |
| 2310039L  | 22.0106 | -1.3095 | 0.66187 | -1.9785 | 0.04787  | 0.13199  | 33.8626 | 36.4138 | 23.8721 | 18.6609 | 3.16808 | 16.0864 | Down |
| Socs2     | 7388.3  | 0.46613 | 0.12375 | 3.76671 | 0.00017  | 0.00118  | 6403.89 | 6312.05 | 5899.27 | 9424.78 | 7325.65 | 8964.15 | Up   |
| Mrpl42    | 2292.52 | -0.4352 | 0.15456 | -2.8156 | 0.00487  | 0.02123  | 2186.55 | 3168    | 2552.4  | 2056.84 | 1907.18 | 1884.12 | Down |
| Gm47718   | 4.08218 | 3.55752 | 1.75122 | 2.03145 | 0.04221  | 0.11956  | 0       | 1.91652 | 0       | 13.4773 | 1.05603 | 8.04321 | Up   |
| Btg1      | 9847.16 | 0.25617 | 0.09992 | 2.56368 | 0.01036  | 0.03935  | 8911.66 | 9176.28 | 8837.44 | 11369.7 | 11142.1 | 9645.82 | Up   |
| Dcn       | 8080.14 | -1.6142 | 0.21663 | -7.4516 | 9.22E-14 | 3.93E-12 | 13249   | 14552.1 | 8742.91 | 4723.28 | 4106.88 | 3106.69 | Down |
| Lum       | 843.576 | -1.4137 | 0.31962 | -4.4231 | 9.73E-06 | 9.56E-05 | 929.769 | 1955.81 | 794.463 | 488.293 | 531.181 | 361.944 | Down |
| Gm48768   | 127.373 | -0.6413 | 0.21222 | -3.022  | 0.00251  | 0.01209  | 147.06  | 165.779 | 152.781 | 97.4513 | 106.659 | 94.5077 | Down |
| B530045E  | 212.662 | -1.712  | 0.29447 | -5.8139 | 6.10E-09 | 1.16E-07 | 257.    |         |         |         |         |         |      |

|           |         |         |         |         |          |          |         |         |         |         |         |         |      |
|-----------|---------|---------|---------|---------|----------|----------|---------|---------|---------|---------|---------|---------|------|
| Csrp2     | 2402.08 | -0.8377 | 0.14613 | -5.7327 | 9.89E-09 | 1.79E-07 | 2751.57 | 3460.27 | 3029.84 | 1918.96 | 1475.27 | 1776.54 | Down |
| Zdhhc17   | 2302.5  | -0.2827 | 0.12085 | -2.3393 | 0.01932  | 0.06498  | 2446.81 | 2436.85 | 2698.5  | 1823.58 | 2193.36 | 2215.9  | Down |
| Gm40761   | 26.1788 | -1.788  | 0.62305 | -2.8698 | 0.00411  | 0.01837  | 22.2525 | 53.6625 | 45.8344 | 17.6242 | 12.6723 | 5.027   | Down |
| Nap1l1    | 15210.9 | -0.4056 | 0.09269 | -4.3762 | 1.21E-05 | 0.00012  | 17327   | 17066.6 | 17611.9 | 13229.5 | 13996.6 | 12033.6 | Down |
| Gm5176    | 45.5446 | -1.3662 | 0.39772 | -3.4351 | 0.00059  | 0.00358  | 73.5301 | 53.6625 | 69.7065 | 16.5875 | 30.6247 | 29.1566 | Down |
| Phlda1    | 1885.18 | 0.91595 | 0.18499 | 4.9515  | 7.36E-07 | 9.41E-06 | 1169.71 | 1393.31 | 1354.98 | 2334.68 | 3108.94 | 1949.47 | Up   |
| Glpr1     | 1685.64 | 0.51395 | 0.15937 | 3.22489 | 0.00126  | 0.00678  | 1229.69 | 1539.92 | 1396.04 | 2220.65 | 1625.22 | 2102.29 | Up   |
| Glpr1l3   | 33.5375 | 1.45867 | 0.52874 | 2.75873 | 0.0058   | 0.02454  | 11.61   | 22.0399 | 20.0525 | 45.6155 | 28.5127 | 73.3943 | Up   |
| Kcnc2     | 156.513 | 2.70435 | 0.33739 | 8.01554 | 1.10E-15 | 6.08E-14 | 55.1476 | 28.7478 | 41.06   | 355.594 | 190.085 | 268.442 | Up   |
| Gm31182   | 4.23517 | 3.60861 | 1.65387 | 2.18192 | 0.02912  | 0.08986  | 1.935   | 0       | 0       | 8.29373 | 2.11205 | 13.0702 | Up   |
| Tph2      | 11.5767 | 2.05612 | 0.7749  | 2.65341 | 0.00797  | 0.0317   | 5.80501 | 5.74955 | 1.90977 | 14.514  | 26.4006 | 15.081  | Up   |
| Tbc1d15   | 4102.7  | 0.25817 | 0.11465 | 2.25183 | 0.02433  | 0.07794  | 4220.24 | 3476.56 | 3513.01 | 4281.64 | 4608.49 | 4516.26 | Up   |
| Rab21     | 6812.66 | 0.27288 | 0.08719 | 3.12964 | 0.00175  | 0.00891  | 6350.68 | 6101.23 | 6058.73 | 7334.76 | 7923.36 | 7107.18 | Up   |
| Tmem19    | 2290.35 | 0.2115  | 0.09184 | 2.30298 | 0.02128  | 0.07002  | 2036.59 | 2217.41 | 2114.11 | 2473.6  | 2538.68 | 2361.69 | Up   |
| Ptprrb    | 30827.4 | -0.4718 | 0.11386 | -4.1435 | 3.42E-05 | 0.00029  | 35004.2 | 31993.4 | 40472.7 | 26420.7 | 26024.7 | 25048.6 | Down |
| Kcnmb4    | 88.1341 | -0.9877 | 0.27053 | -3.6509 | 0.00026  | 0.00175  | 132.548 | 114.033 | 105.037 | 62.203  | 49.6332 | 65.3511 | Down |
| Kcnmb4os  | 14.3398 | -1.66   | 0.67482 | -2.4599 | 0.0139   | 0.04998  | 28.0575 | 13.4156 | 23.8721 | 9.33044 | 6.33615 | 5.027   | Down |
| 5330438D  | 176.266 | -0.7368 | 0.24345 | -3.0266 | 0.00247  | 0.01193  | 261.225 | 170.57  | 229.172 | 153.434 | 123.555 | 119.643 | Down |
| Lrrc10    | 108.986 | -6.7394 | 1.80696 | -3.7297 | 0.00019  | 0.00135  | 57.0826 | 465.714 | 125.09  | 0       | 0       | 6.03241 | Down |
| Yeats4    | 2811.99 | 0.24349 | 0.08379 | 2.90596 | 0.00366  | 0.01666  | 2583.23 | 2536.51 | 2605.88 | 3046.91 | 3159.63 | 2939.79 | Up   |
| Lyz2      | 571618  | 1.79216 | 0.23378 | 7.66602 | 1.77E-14 | 8.30E-13 | 365884  | 192894  | 209643  | 851191  | 1021058 | 789036  | Up   |
| Gm48903   | 25.205  | -3.4982 | 0.76595 | -4.5672 | 4.94E-06 | 5.23E-05 | 22.2525 | 71.8694 | 44.8795 | 2.07343 | 2.11205 | 8.04321 | Down |
| Cpm       | 9462.14 | 0.53732 | 0.09876 | 5.44076 | 5.31E-08 | 8.38E-07 | 8201.51 | 6987.62 | 7971.36 | 11031.7 | 11542.4 | 11038.3 | Up   |
| Slc35e3   | 2288.64 | -0.3328 | 0.13517 | -2.462  | 0.01382  | 0.04977  | 2580.33 | 2452.18 | 2622.11 | 2124.23 | 1693.86 | 2259.14 | Down |
| Gm40773   | 72.564  | -0.9789 | 0.28645 | -3.4175 | 0.00063  | 0.00378  | 83.2051 | 93.9093 | 111.721 | 49.7624 | 47.5211 | 49.2646 | Down |
| Mdm1      | 1225.73 | -0.6419 | 0.18197 | -3.5274 | 0.00042  | 0.00266  | 1273.23 | 1769.9  | 1439.01 | 1028.42 | 774.067 | 1069.75 | Down |
| Gm38403   | 15.4676 | -1.5403 | 0.69477 | -2.217  | 0.02662  | 0.08373  | 20.3175 | 11.4991 | 37.2404 | 7.25701 | 8.4482  | 8.04321 | Down |
| Gm47480   | 19.6713 | -3.2304 | 0.65801 | -4.9094 | 9.13E-07 | 1.14E-05 | 41.6026 | 33.5391 | 31.5111 | 2.07343 | 5.28013 | 4.0216  | Down |
| Gm34045   | 63.9811 | -0.6933 | 0.29396 | -2.3584 | 0.01835  | 0.06244  | 80.3026 | 75.7024 | 81.165  | 57.0194 | 46.4651 | 43.2322 | Down |
| Grip1os3  | 7.28225 | -2.3362 | 0.95967 | -2.4343 | 0.01492  | 0.05284  | 9.67501 | 17.2487 | 9.54883 | 1.03672 | 3.16808 | 3.0162  | Down |
| Helb      | 236.496 | 0.48709 | 0.21591 | 2.25592 | 0.02408  | 0.07731  | 236.07  | 150.447 | 204.345 | 260.216 | 290.407 | 277.491 | Up   |
| Tmbim4    | 4385.28 | 0.31461 | 0.10078 | 3.12163 | 0.0018   | 0.00912  | 3890.32 | 4000.73 | 3835.76 | 5124.49 | 5065.75 | 4394.61 | Up   |
| Llph      | 1935.56 | -0.2393 | 0.10402 | -2.3005 | 0.02142  | 0.07034  | 2084    | 2033.42 | 2169.49 | 1856.76 | 1846.99 | 1622.72 | Down |
| 4921513IC | 25.0111 | -1.7683 | 0.5452  | -3.2433 | 0.00118  | 0.00641  | 22.2525 | 49.8294 | 43.9246 | 12.4406 | 10.5603 | 11.0594 | Down |
| Msrp3     | 5316.78 | -0.4626 | 0.11488 | -4.0267 | 5.66E-05 | 0.00046  | 5418.01 | 6295.76 | 6772.03 | 4306.52 | 4623.28 | 4485.09 | Down |
| Wif1      | 445.592 | -1.4791 | 0.21459 | -6.8927 | 5.47E-12 | 1.76E-10 | 842.694 | 577.83  | 547.148 | 214.6   | 265.062 | 226.215 | Down |
| Gns       | 18779.9 | 0.94892 | 0.10451 | 9.07995 | 1.09E-19 | 9.19E-18 | 13844.9 | 13077.4 | 11529.3 | 23785.4 | 25891.6 | 24550.9 | Up   |
| D930020E  | 208.789 | -2.0873 | 0.24848 | -8.4    | 4.46E-17 | 2.99E-15 | 374.423 | 307.601 | 332.299 | 81.9006 | 55.9693 | 100.54  | Down |
| Gm35865   | 18.4364 | -2.5077 | 0.60596 | -4.1384 | 3.50E-05 | 0.0003   | 28.0575 | 30.6643 | 35.3307 | 4.14686 | 7.39218 | 5.027   | Down |
| Gm48877   | 13.5726 | -2.7621 | 1.12483 | -2.4556 | 0.01407  | 0.05048  | 9.67501 | 39.2886 | 21.9623 | 0       | 9.50423 | 1.0054  | Down |
| Ppm1h     | 1820.62 | 0.67907 | 0.09399 | 7.22527 | 5.00E-13 | 1.90E-11 | 1365.14 | 1455.59 | 1378.85 | 2140.82 | 2321.14 | 2262.15 | Up   |
| D630033A  | 77.8481 | -0.9983 | 0.29861 | -3.3431 | 0.00083  | 0.00475  | 123.84  | 84.3268 | 103.127 | 44.5788 | 54.9133 | 56.3024 | Down |
| Usp15     | 3715.16 | 0.22574 | 0.08638 | 2.61343 | 0.00896  | 0.03488  | 3296.28 | 3418.11 | 3560.76 | 3867.99 | 4153.35 | 3994.46 | Up   |
| Tspan31   | 3171.87 | 0.2923  | 0.08641 | 3.38265 | 0.00072  | 0.00422  | 2987.64 | 2781.82 | 2785.39 | 3520.69 | 3571.48 | 3384.18 | Up   |
| Os9       | 10652.9 | 0.32073 | 0.08644 | 3.71033 | 0.00021  | 0.00143  | 9666.31 | 8893.6  | 9861.08 | 12261.2 | 11589.9 | 11645.6 | Up   |
| B4galnt1  | 4364.34 | 1.14669 | 0.11003 | 10.4212 | 1.98E-25 | 2.80E-23 | 2657.73 | 2993.6  | 2496.06 | 6380.99 | 5477.95 | 5909.75 | Up   |
| Slc26a10  | 473.037 | 0.54592 | 0.27386 | 1.99344 | 0.04621  | 0.12825  | 256.388 | 444.632 | 452.614 | 587.818 | 689.585 | 407.187 | Up   |
| Arhgef25  | 1882.23 | -0.4173 | 0.12102 | -3.4481 | 0.00056  | 0.00343  | 2091.74 | 2127.33 | 2238.25 | 1611.06 | 1797.36 | 1427.67 | Down |
| Pip4k2c   | 431.686 | 0.81301 | 0.19302 | 4.21216 | 2.53E-05 | 0.00022  | 372.488 | 256.813 | 310.337 | 566.047 | 474.155 | 610.278 | Up   |
| Arhgap9   | 1140.36 | 0.59335 | 0.17299 | 3.42992 | 0.0006   | 0.00363  | 992.657 | 943.885 | 790.643 | 1284.49 | 1662.18 | 1168.28 | Up   |
| Ndufa4l2  | 1025.77 | -0.7814 | 0.15978 | -4.8901 | 1.01E-06 | 1.24E-05 | 1134.88 | 1319.52 | 1436.14 | 745.399 | 870.165 | 648.484 | Down |
| Stat6     | 9644.07 | 0.3208  | 0.08836 | 3.63051 | 0.00028  | 0.00189  | 8357.28 | 8401.05 | 8970.17 | 10290.4 | 11370.2 | 10475.3 | Up   |
| Myo1a     | 43.6811 | 0.97608 | 0.42166 | 2.31483 | 0.02062  | 0.06833  | 31.9275 | 30.6643 | 25.7818 | 70.4967 | 34.8488 | 68.3673 | Up   |
| Gpr182    | 2432.57 | -0.5363 | 0.18635 | -2.8782 | 0.004    | 0.01797  | 3206.3  | 2178.12 | 3254.24 | 1904.45 | 2296.86 | 1755.43 | Down |
| Sdr9c7    | 25.6789 | -1.2537 | 0.46617 | -2.6893 | 0.00716  | 0.02904  | 36.7651 | 37.3721 | 34.3758 | 18.6609 | 15.8404 | 11.0594 | Down |
| Hsd17b6   | 3.09307 | 4.09163 | 1.90602 | 2.14669 | 0.03182  | 0.09588  | 0       | 0.95826 | 0       | 13.4773 | 2.11205 | 2.0108  | Up   |
| Atp5b     | 37167.2 | -0.3684 | 0.1708  | -2.1567 | 0.03103  | 0.09409  | 37312.7 | 53758.3 | 34588.7 | 32663.8 | 33103.2 | 31576.6 | Down |
| Stat2     | 3354.46 | 0.49381 | 0.10844 | 4.5536  | 5.27E-06 | 5.54E-05 | 2712.87 | 2909.27 | 2735.74 | 3577.71 | 3883.01 | 4308.14 | Up   |
| Cnpy2     | 2962.29 | 0.21096 | 0.0889  | 2.37315 | 0.01764  | 0.06043  | 2786.4  | 2822.07 | 2629.75 | 3312.31 | 3162.8  | 3060.44 | Up   |
| Coq10a    | 2175.01 | -0.3875 | 0.16002 | -2.4216 | 0.01545  | 0.05434  | 2214.61 | 3059.72 | 2121.75 | 1869.2  | 1896.62 | 1888.14 | Down |
| Ankrd52   | 550.787 | 0.44313 | 0.17766 | 2.49424 | 0.01262  | 0.04625  | 467.303 | 396.719 | 536.644 | 565.01  | 605.103 | 733.943 | Up   |
| Rnf41     | 2474.96 | 0.34909 | 0.08863 | 3.93877 | 8.19E-05 | 0.00064  | 2226.22 | 2155.12 | 2149.44 | 2747.3  | 2909.35 | 2662.3  | Up   |
| Esyf1     | 7474.01 | 0.36657 | 0.12502 | 2.93199 | 0.00337  | 0.01555  | 7264.97 | 5924.91 | 6398.67 | 8356.97 | 9264.51 | 7634.01 | Up   |
| Ikzf4     | 218.935 | -0.6214 | 0.22981 | -2.704  | 0.00685  | 0.02805  | 201.24  | 275.978 | 318.931 | 168.985 | 159.46  | 189.015 | Down |
| Suox      | 1187.28 | -0.2979 | 0.1141  | -2.6113 | 0.00902  | 0.03506  | 1216.15 | 1405.77 | 1306.28 | 1126.91 | 1058.14 | 1010.43 | Down |
| Rab5b     | 6151.41 | 0.37248 | 0.13956 | 2.6689  | 0.00761  | 0.03053  | 6398.09 | 4803.75 | 4883.27 | 6753.17 | 7353.1  | 6717.08 | Up   |
| Cdk2      | 1441.6  | 0.47005 | 0.1237  | 3.80008 | 0.00014  | 0.00105  | 1301.29 | 1062.71 | 1262.36 | 1705.4  | 1741.39 | 1576.47 | Up   |
| Dnajc14   | 3414.19 | 0.34062 | 0.11946 | 2.8513  | 0.00435  | 0.0193   | 3250.8  | 2636.17 | 3152.07 | 3576.67 | 3967.49 | 3901.96 | Up   |
| Gdf11     | 106.007 | 0.82592 | 0.31172 | 2.64953 | 0.00806  | 0.03201  | 60.9526 | 107.325 | 61.1125 | 117.149 | 145.732 | 143.772 | Up   |
| Cd63      | 15696.9 | 0.86935 | 0.11936 | 7.28356 | 3.25E-13 | 1.27E-11 | 12073.5 | 10575.3 | 10668   | 20644.1 | 22280   | 17940.4 | Up   |
| Itga7     | 4924.9  | 1.92341 | 0.17803 | 10.8038 | 3.30E-27 | 5.65E-25 | 1812.13 | 2519.26 | 1833.38 | 7554.55 | 9187.42 | 6642.68 | Up   |
| Vmn2r87   | 17.749  | 1.49393 | 0.63253 | 2.36185 | 0.01818  | 0.06196  | 14.5125 | 9.58259 | 3.81953 | 24.8812 | 29.5687 | 24.1296 | Up   |
| Gm35405   | 13.5031 | 1.3324  | 0.65321 | 2.03977 | 0.04137  | 0.11764  | 4.83751 | 7.66607 | 10.5037 | 19.6976 | 23.2326 | 15.081  | Up   |
| Gm12592   | 378.166 | -0.7823 | 0.17202 | -4.5476 | 5.43E-06 | 5.69E-05 | 424.733 | 493.503 | 516.592 | 239.481 | 283.015 | 311.674 | Down |
| Pik3ip1   | 2226.5  | -0.303  | 0.13175 | -2.2997 | 0.02146  | 0.07046  | 2649.99 | 2617    | 2111.25 | 1918.96 | 2159.57 | 1902.22 | Down |
| Limk2     | 6325.76 | 0.39126 | 0.11449 | 3.41735 | 0.00063  | 0.00378  | 5100.67 | 5937.37 | 5381.72 | 7345.13 | 6469.21 | 7720.47 | Up   |
| Selenom   | 1126.89 | -0.7405 | 0.16963 | -4.3657 | 1.27E-05 | 0.0      |         |         |         |         |         |         |      |

|          |         |         |         |         |          |          |         |         |         |         |         |         |      |
|----------|---------|---------|---------|---------|----------|----------|---------|---------|---------|---------|---------|---------|------|
| Lif      | 692.804 | 1.55681 | 0.26266 | 5.92714 | 3.08E-09 | 6.23E-08 | 275.738 | 384.262 | 394.367 | 964.146 | 1422.47 | 715.845 | Up   |
| Ascc2    | 5120.95 | 0.25927 | 0.09252 | 2.80233 | 0.00507  | 0.02199  | 4441.8  | 4633.18 | 4910.96 | 5351.53 | 5894.73 | 5493.51 | Up   |
| Uqcr10   | 1511.76 | -0.2285 | 0.11421 | -2.0006 | 0.04543  | 0.12649  | 1481.24 | 1749.78 | 1662.45 | 1397.49 | 1460.48 | 1319.09 | Down |
| Nefh     | 36.9459 | 1.67761 | 0.39925 | 4.20195 | 2.65E-05 | 0.00023  | 17.415  | 19.1652 | 16.233  | 52.8725 | 49.6332 | 66.3565 | Up   |
| Ap1b1    | 5102.68 | 0.57064 | 0.08312 | 6.86529 | 6.64E-12 | 2.12E-10 | 4199.92 | 4133.93 | 3985.68 | 6365.44 | 5872.56 | 6058.55 | Up   |
| Gas2l1   | 4370.19 | 0.50843 | 0.10891 | 4.66826 | 3.04E-06 | 3.38E-05 | 3629.1  | 3683.55 | 3511.1  | 5252    | 5576.87 | 4568.54 | Up   |
| Xbp1     | 16234.1 | 0.25102 | 0.11057 | 2.27031 | 0.02319  | 0.0751   | 13745.3 | 14000.2 | 16730.5 | 17696.7 | 18200.6 | 17031.5 | Up   |
| Urgcp    | 1359.16 | 0.22129 | 0.10341 | 2.14005 | 0.03235  | 0.097    | 1315.8  | 1226.57 | 1223.2  | 1452.44 | 1387.62 | 1549.32 | Up   |
| Dbnl     | 6658.9  | 0.91482 | 0.12724 | 7.18958 | 6.50E-13 | 2.41E-11 | 4902.33 | 4379.24 | 4565.3  | 8639.99 | 9892.85 | 7573.68 | Up   |
| Pgam2    | 1275.88 | -1.4615 | 0.62695 | -2.3311 | 0.01975  | 0.06615  | 1041.03 | 3548.43 | 1026.5  | 698.746 | 825.812 | 514.765 | Down |
| Polm     | 1307.82 | 0.43245 | 0.11124 | 3.88736 | 0.0001   | 0.00077  | 1033.29 | 1159.49 | 1146.81 | 1532.27 | 1574.53 | 1400.52 | Up   |
| Myl7     | 7096.79 | -5.4179 | 1.14809 | -4.7191 | 2.37E-06 | 2.69E-05 | 8983.25 | 23256   | 9368.36 | 218.747 | 28.5127 | 725.899 | Down |
| Ykt6     | 5192.17 | 0.24559 | 0.09526 | 2.57799 | 0.00994  | 0.03803  | 5022.3  | 4816.21 | 4415.38 | 5438.61 | 5892.62 | 5567.91 | Up   |
| Ppia     | 27666.5 | 0.22866 | 0.07818 | 2.92489 | 0.00345  | 0.01585  | 25746.2 | 24806.4 | 25883.1 | 31282.9 | 29301.5 | 28978.7 | Up   |
| Myo1g    | 1992.87 | 0.72327 | 0.13032 | 5.54998 | 2.86E-08 | 4.73E-07 | 1585.73 | 1628.08 | 1296.73 | 2437.32 | 2672.8  | 2336.55 | Up   |
| Nacad    | 224.172 | -0.4413 | 0.20703 | -2.1315 | 0.03305  | 0.09869  | 237.038 | 227.107 | 310.337 | 205.27  | 195.365 | 169.913 | Down |
| Ramp3    | 420.343 | -1.085  | 0.20039 | -5.4143 | 6.15E-08 | 9.53E-07 | 548.573 | 610.411 | 554.787 | 262.289 | 336.872 | 209.123 | Down |
| Adcy1    | 185.974 | -2.2356 | 0.29175 | -7.6626 | 1.82E-14 | 8.51E-13 | 322.178 | 385.22  | 212.939 | 55.9827 | 79.2019 | 60.3241 | Down |
| Igfbp3   | 5134.63 | -2.0271 | 0.2412  | -8.4043 | 4.30E-17 | 2.90E-15 | 7833.86 | 6211.43 | 10692.8 | 2521.29 | 2104.66 | 1443.76 | Down |
| Tns3     | 13878.5 | -0.2685 | 0.08114 | -3.3085 | 0.00094  | 0.00529  | 14898.6 | 14756.2 | 15843.4 | 13040.8 | 12162.2 | 12569.5 | Down |
| Gm11992  | 746.455 | -0.714  | 0.24302 | -2.9379 | 0.0033   | 0.01528  | 824.311 | 1049.29 | 909.049 | 618.919 | 364.329 | 712.829 | Down |
| Abca13   | 46.0927 | -1.1383 | 0.43651 | -2.6078 | 0.00911  | 0.03536  | 70.6276 | 69.9529 | 49.6539 | 16.5875 | 28.5127 | 41.2214 | Down |
| Vvwc2    | 75.0732 | -1.5898 | 0.37578 | -4.2308 | 2.33E-05 | 0.00021  | 119.003 | 139.906 | 79.2553 | 48.7256 | 25.3446 | 38.2052 | Down |
| Spata48  | 47.367  | -1.238  | 0.42291 | -2.9274 | 0.00342  | 0.01575  | 52.2451 | 82.4102 | 64.932  | 16.5875 | 34.8488 | 33.1782 | Down |
| Ikzf1    | 1618.25 | 0.38884 | 0.1154  | 3.36954 | 0.00075  | 0.00439  | 1443.51 | 1412.47 | 1348.29 | 1735.46 | 2044.47 | 1725.27 | Up   |
| Figl1    | 124.897 | 1.02389 | 0.29964 | 3.417   | 0.00063  | 0.00379  | 106.425 | 86.2433 | 54.4283 | 144.104 | 173.188 | 184.994 | Up   |
| Ddc      | 157.234 | -1.6217 | 0.27674 | -5.8602 | 4.62E-09 | 9.07E-08 | 180.923 | 315.267 | 215.804 | 74.6435 | 82.37   | 74.3997 | Down |
| Grb10    | 3016.53 | -0.6061 | 0.14968 | -4.0495 | 5.13E-05 | 0.00042  | 2996.35 | 3595.39 | 4331.35 | 2446.65 | 2328.54 | 2400.9  | Down |
| Cobl     | 3803.28 | 0.55757 | 0.11436 | 4.87555 | 1.09E-06 | 1.33E-05 | 3281.76 | 2893.94 | 3056.58 | 4337.62 | 4216.71 | 5033.04 | Up   |
| Vstm2a   | 309.525 | 2.66341 | 0.41933 | 6.35161 | 2.13E-10 | 5.35E-09 | 138.353 | 79.5355 | 35.3307 | 403.282 | 738.162 | 462.484 | Up   |
| Akt2-ps  | 306.258 | 0.68587 | 0.2253  | 3.04418 | 0.00233  | 0.01134  | 287.348 | 239.565 | 177.608 | 380.874 | 325.256 | 427.295 | Up   |
| Gm12663  | 277.26  | 0.5105  | 0.21003 | 2.43061 | 0.01507  | 0.05326  | 278.64  | 190.693 | 216.758 | 341.08  | 355.881 | 280.507 | Up   |
| Egfr     | 1644.96 | -1.0105 | 0.1948  | -5.1873 | 2.13E-07 | 3.00E-06 | 1571.22 | 2444.52 | 2580.09 | 1073    | 1029.62 | 1171.29 | Down |
| Plek     | 5186.61 | 1.65012 | 0.19088 | 8.64492 | 5.38E-18 | 4.03E-16 | 2847.36 | 2637.13 | 2034.86 | 6698.22 | 9905.52 | 6996.58 | Up   |
| Cnrip1   | 428.219 | -0.4802 | 0.14389 | -3.3375 | 0.00085  | 0.00483  | 476.978 | 483.921 | 535.689 | 327.602 | 359.049 | 386.074 | Down |
| Ppp3r1   | 75.6017 | 0.6734  | 0.27382 | 2.45924 | 0.01392  | 0.05005  | 62.8876 | 59.412  | 52.5186 | 81.9006 | 101.378 | 95.5131 | Up   |
| Etaa1os  | 15.5341 | -1.2984 | 0.61364 | -2.116  | 0.03435  | 0.10174  | 21.285  | 17.2487 | 27.6916 | 9.33044 | 11.6163 | 6.03241 | Down |
| Meis1    | 1854.41 | -0.3071 | 0.14842 | -2.0689 | 0.03855  | 0.11133  | 1996.92 | 1962.51 | 2193.37 | 1471.1  | 1986.38 | 1516.14 | Down |
| Spred2   | 2088.09 | -0.2972 | 0.13461 | -2.2077 | 0.02726  | 0.08529  | 2118.83 | 2277.78 | 2510.39 | 1662.89 | 2125.78 | 1832.85 | Down |
| Actr2    | 15262.4 | 0.406   | 0.08918 | 4.5524  | 5.30E-06 | 5.57E-05 | 12984.8 | 12544.6 | 13857.3 | 16681.8 | 18335.8 | 17170.2 | Up   |
| Slc1a4   | 3497.08 | -0.7193 | 0.19907 | -3.6131 | 0.0003   | 0.002    | 3404.64 | 4368.7  | 5280.5  | 2727.6  | 2099.38 | 3101.66 | Down |
| Lgalsl   | 2651.28 | -0.4156 | 0.07977 | -5.2107 | 1.88E-07 | 2.68E-06 | 3026.34 | 2988.81 | 3076.63 | 2260.04 | 2251.45 | 2304.38 | Down |
| Mdh1     | 12913.5 | -0.5905 | 0.22516 | -2.6227 | 0.00872  | 0.03413  | 12028.9 | 22192.3 | 12339   | 10783.9 | 9891.79 | 10245   | Down |
| Otx1     | 136.071 | -1.7559 | 0.61656 | -2.8479 | 0.0044   | 0.01947  | 103.523 | 373.721 | 152.781 | 49.7624 | 19.0085 | 117.632 | Down |
| Ehbp1    | 1471.12 | -0.4351 | 0.18019 | -2.4145 | 0.01576  | 0.05522  | 1507.37 | 2165.66 | 1400.81 | 1213.99 | 1242.94 | 1295.96 | Down |
| Tmem17   | 342.701 | -0.3544 | 0.16576 | -2.1377 | 0.03254  | 0.09742  | 349.268 | 384.262 | 420.148 | 339.006 | 283.015 | 280.507 | Down |
| Pus10    | 1579.35 | 0.41356 | 0.09124 | 4.53246 | 5.83E-06 | 6.06E-05 | 1355.47 | 1361.69 | 1346.38 | 1727.17 | 1857.55 | 1827.82 | Up   |
| Rel      | 1151.31 | 0.34434 | 0.14531 | 2.36963 | 0.01781  | 0.06091  | 1149.39 | 1014.8  | 879.447 | 1217.1  | 1423.52 | 1223.57 | Up   |
| Ccdc85a  | 2385.78 | -0.3944 | 0.11132 | -3.5433 | 0.0004   | 0.00253  | 2655.79 | 2762.66 | 2710.91 | 2124.23 | 2229.27 | 1831.84 | Down |
| Efemp1   | 8257.72 | -0.2507 | 0.12368 | -2.0267 | 0.04269  | 0.12057  | 9932.37 | 8406.8  | 8580.58 | 8390.14 | 7423.86 | 6812.6  | Down |
| A630052C | 367.635 | -0.4896 | 0.14508 | -3.3745 | 0.00074  | 0.00432  | 413.123 | 404.385 | 470.757 | 309.978 | 299.911 | 307.653 | Down |
| Ccdc88a  | 1468.91 | 0.36797 | 0.12056 | 3.05215 | 0.00227  | 0.0111   | 1310.96 | 1217.95 | 1318.69 | 1553    | 1856.49 | 1556.36 | Up   |
| Gm12092  | 4.18538 | -3.4985 | 1.57471 | -2.2216 | 0.02631  | 0.08297  | 12.5775 | 5.74955 | 4.77441 | 0       | 0       | 2.0108  | Down |
| Sptbn1   | 65420.3 | -0.2392 | 0.08933 | -2.6778 | 0.00741  | 0.02988  | 70011.3 | 66591.3 | 75892.2 | 59171.6 | 62126   | 58729.5 | Down |
| Gm8098   | 213.126 | -0.4395 | 0.21105 | -2.0824 | 0.03731  | 0.10854  | 198.338 | 260.646 | 276.916 | 185.572 | 196.421 | 160.864 | Down |
| Acyp2    | 942.175 | -0.5837 | 0.14701 | -3.9705 | 7.17E-05 | 0.00057  | 1014.91 | 1305.15 | 1070.42 | 783.757 | 794.131 | 684.678 | Down |
| Psme4    | 5397.53 | 0.25508 | 0.09288 | 2.74625 | 0.00603  | 0.02526  | 4834.6  | 5282.88 | 4647.42 | 5679.13 | 5914.8  | 6026.37 | Up   |
| Stc2     | 534.883 | 1.46424 | 0.27007 | 5.42175 | 5.90E-08 | 9.20E-07 | 266.063 | 376.596 | 211.029 | 1011.83 | 766.674 | 577.1   | Up   |
| Bod1     | 2424.63 | -0.3575 | 0.11012 | -3.2463 | 0.00117  | 0.00636  | 2709.97 | 2792.37 | 2667.94 | 2319.13 | 2151.12 | 1907.25 | Down |
| Cpeb4    | 5745.49 | 0.48702 | 0.09237 | 5.27243 | 1.35E-07 | 1.95E-06 | 4500.82 | 4924.49 | 4929.11 | 6330.19 | 6947.59 | 6840.75 | Up   |
| Nsg2     | 134.136 | -0.8162 | 0.28912 | -2.823  | 0.00476  | 0.02082  | 131.58  | 220.399 | 161.375 | 108.855 | 76.0338 | 106.572 | Down |
| Rhbdf1   | 3955.58 | -0.2644 | 0.10381 | -2.5466 | 0.01088  | 0.04098  | 4335.37 | 3963.36 | 4652.19 | 3785.05 | 3458.48 | 3539.01 | Down |
| Hba-a2   | 3014.2  | -2.8163 | 0.8095  | -3.4791 | 0.0005   | 0.00312  | 8371.79 | 3434.4  | 4030.56 | 337.969 | 1556.58 | 353.901 | Down |
| Sh3pxd2b | 2027.95 | 0.93283 | 0.155   | 6.0184  | 1.76E-09 | 3.69E-08 | 1131.01 | 1607    | 1444.74 | 2485.01 | 2609.44 | 2890.53 | Up   |
| Ubt2d    | 226.068 | 0.68257 | 0.23305 | 2.92889 | 0.0034   | 0.01569  | 210.915 | 150.447 | 159.465 | 268.509 | 231.27  | 335.804 | Up   |
| Stk10    | 1526.72 | 0.4719  | 0.16162 | 2.91987 | 0.0035   | 0.01607  | 1486.08 | 1258.19 | 1093.34 | 1690.88 | 2041.3  | 1590.54 | Up   |
| Fgf18    | 418.699 | 0.5562  | 0.25294 | 2.19897 | 0.02788  | 0.08687  | 441.181 | 241.481 | 334.209 | 509.027 | 587.15  | 399.144 | Up   |
| Gabrp    | 9558.5  | -0.512  | 0.25188 | -2.0327 | 0.04209  | 0.11934  | 8664.94 | 13983.9 | 11062.3 | 8182.8  | 5159.74 | 10297.3 | Down |
| 4930469K | 56.9505 | 0.92183 | 0.32743 | 2.81536 | 0.00487  | 0.02124  | 34.8301 | 46.9547 | 36.2855 | 81.9006 | 62.3055 | 79.4267 | Up   |
| Dock2    | 1875.33 | 0.74743 | 0.17815 | 4.19549 | 2.72E-05 | 0.00024  | 1671.84 | 1343.48 | 1185.01 | 2158.44 | 2809.03 | 2084.2  | Up   |
| Spdl1    | 154.893 | 0.99134 | 0.21915 | 4.52357 | 6.08E-06 | 6.30E-05 | 104.49  | 94.8676 | 111.721 | 179.352 | 200.645 | 238.28  | Up   |
| Slit3    | 1442.97 | -0.5381 | 0.1614  | -3.3339 | 0.00086  | 0.00488  | 1807.29 | 1693.24 | 1626.17 | 1237.84 | 1362.27 | 931.001 | Down |
| Pank3    | 6160.4  | 0.32842 | 0.101   | 3.25176 | 0.00115  | 0.00627  | 5761.47 | 5483.16 | 5142.04 | 6339.52 | 7292.91 | 6943.3  | Up   |
| Wwc1     | 14747.5 | 0.29452 | 0.106   | 2.77839 | 0.00546  | 0.02333  | 12887.1 | 12122   | 14732.9 | 16083.6 | 16817.2 | 15842.1 | Up   |
| Hmmr     | 103.243 | 1.43667 | 0.32807 | 4.3791  | 1.19E-05 | 0.00011  | 59.9851 | 68.0364 | 39.1502 | 133.736 | 122.499 | 196.053 | Up   |
| Nudcd2   | 1409.58 | 0.21077 | 0.1013  | 2.08068 | 0.03746  | 0.1089   | 1375.79 | 1279.28 | 1265.22 | 1542.63 | 1561.86 | 1432.7  | Up   |
| Ccng1    | 10617.1 | 0.39764 | 0.18593 | 2.13867 | 0.03246  | 0.09725  | 8618.5  | 11781.8 | 7089.05 |         |         |         |      |

|           |         |         |         |         |          |          |         |         |         |         |         |         |      |
|-----------|---------|---------|---------|---------|----------|----------|---------|---------|---------|---------|---------|---------|------|
| Rnf145    | 7649.15 | 0.47013 | 0.13891 | 3.38434 | 0.00071  | 0.0042   | 7565.86 | 5445.78 | 6229.66 | 9170.79 | 8995.22 | 8487.59 | Up   |
| Ebf1      | 941.589 | -0.6838 | 0.16131 | -4.2393 | 2.24E-05 | 0.0002   | 1059.41 | 1332.94 | 1089.52 | 622.03  | 824.756 | 720.872 | Down |
| Clint1    | 8269.69 | 0.79982 | 0.0773  | 10.3475 | 4.30E-25 | 5.79E-23 | 6128.15 | 6101.23 | 5873.48 | 10356.8 | 10881.3 | 10277.2 | Up   |
| Adam19    | 733.527 | 1.66246 | 0.16014 | 10.3815 | 3.01E-25 | 4.11E-23 | 372.488 | 386.178 | 297.923 | 981.77  | 1218.65 | 1144.15 | Up   |
| Cyfp2     | 2756.25 | -0.3954 | 0.1951  | -2.0265 | 0.04272  | 0.12062  | 3009.9  | 3722.83 | 2662.21 | 2532.7  | 1805.8  | 2804.06 | Down |
| Havcr2    | 725.365 | 1.81398 | 0.27105 | 6.69254 | 2.19E-11 | 6.52E-10 | 466.336 | 244.356 | 253.044 | 1018.05 | 1398.18 | 972.223 | Up   |
| Timd4     | 117.427 | -0.612  | 0.29647 | -2.0643 | 0.03899  | 0.11226  | 179.955 | 128.407 | 117.451 | 95.3779 | 112.995 | 70.3781 | Down |
| Gm12183   | 1848.74 | 0.35561 | 0.13306 | 2.6726  | 0.00753  | 0.03027  | 1688.29 | 1579.21 | 1598.47 | 2364.75 | 2075.09 | 1786.6  | Up   |
| Gm12184   | 276.542 | -0.4186 | 0.17091 | -2.4493 | 0.01431  | 0.05115  | 272.835 | 338.265 | 338.029 | 245.702 | 229.158 | 235.264 | Down |
| Irgm1     | 3146.91 | 0.66337 | 0.11638 | 5.70028 | 1.20E-08 | 2.13E-07 | 2643.21 | 2378.4  | 2285.99 | 3677.23 | 4262.12 | 3634.52 | Up   |
| Gm5431    | 465.863 | 1.884   | 0.25558 | 7.37152 | 1.69E-13 | 6.96E-12 | 146.093 | 275.978 | 173.789 | 797.234 | 598.766 | 803.315 | Up   |
| Olfr1392  | 6.42077 | 2.00803 | 0.98923 | 2.02989 | 0.04237  | 0.11987  | 1.935   | 1.91652 | 3.81953 | 14.514  | 5.28013 | 11.0594 | Up   |
| Cnot6     | 6976.4  | 0.23341 | 0.07771 | 3.00349 | 0.00267  | 0.01274  | 6263.6  | 6336.01 | 6640.26 | 7406.3  | 7476.66 | 7735.55 | Up   |
| Gfp2      | 919.674 | -1.3005 | 0.16544 | -7.8607 | 3.82E-15 | 1.96E-13 | 1131.98 | 1447.93 | 1344.48 | 552.57  | 597.71  | 443.382 | Down |
| Rasgef1c  | 25.8143 | -1.571  | 0.74586 | -2.1063 | 0.03518  | 0.10373  | 12.5775 | 59.412  | 43.9246 | 18.6609 | 4.2241  | 16.0864 | Down |
| Tbcl1d9b  | 6778.25 | 0.22536 | 0.08096 | 2.78363 | 0.00538  | 0.02301  | 6228.77 | 6333.13 | 6187.64 | 7555.59 | 7429.14 | 6935.26 | Up   |
| Mgat4b    | 5893.13 | 0.52851 | 0.11599 | 4.5565  | 5.20E-06 | 5.48E-05 | 4901.36 | 4776.92 | 4798.29 | 7097.36 | 7713.21 | 6071.62 | Up   |
| Ltc4s     | 142.995 | 1.52511 | 0.45008 | 3.38851 | 0.0007   | 0.00415  | 97.7176 | 92.9511 | 30.5563 | 202.16  | 298.855 | 135.729 | Up   |
| Canx      | 21534.8 | 0.29283 | 0.09181 | 3.18974 | 0.00142  | 0.00751  | 18599.2 | 18875.8 | 20594.9 | 22664.7 | 25116.5 | 23357.5 | Up   |
| Hnrmph1   | 22577.6 | -0.2493 | 0.11701 | -2.1302 | 0.03316  | 0.09898  | 22872.7 | 22752.9 | 27943.7 | 19987.9 | 20098.1 | 21814.2 | Down |
| Zfp354c   | 442.291 | -0.5816 | 0.12753 | -4.5602 | 5.11E-06 | 5.40E-05 | 508.906 | 535.667 | 546.193 | 346.263 | 353.768 | 362.95  | Down |
| Zfp879    | 54.4468 | -0.7272 | 0.35898 | -2.0258 | 0.04278  | 0.12074  | 69.6601 | 81.452  | 52.5186 | 50.7991 | 39.0729 | 33.1782 | Down |
| Zfp2      | 445.696 | -0.2819 | 0.13976 | -2.0166 | 0.04374  | 0.12295  | 506.003 | 458.048 | 503.223 | 366.997 | 427.69  | 412.214 | Down |
| Zfp354b   | 239.559 | -0.4329 | 0.20016 | -2.163  | 0.03054  | 0.09298  | 288.315 | 262.563 | 275.006 | 215.637 | 161.572 | 234.258 | Down |
| Clk4      | 6225.39 | -0.2739 | 0.1032  | -2.6538 | 0.00796  | 0.03168  | 6616.74 | 6630.19 | 7196.95 | 5602.41 | 5187.2  | 6118.87 | Down |
| Col23a1   | 4760.78 | -0.6082 | 0.09198 | -6.6119 | 3.79E-11 | 1.07E-09 | 5773.08 | 5477.41 | 5998.57 | 3768.46 | 3577.81 | 3969.32 | Down |
| Hnrmgab   | 4138.21 | 0.31741 | 0.0929  | 3.41664 | 0.00063  | 0.00379  | 3922.25 | 3543.64 | 3588.45 | 4728.46 | 4673.97 | 4372.49 | Up   |
| Ube2b     | 13433.5 | -0.2841 | 0.09919 | -2.8645 | 0.00418  | 0.01864  | 13572.1 | 15992.4 | 14691.8 | 11978.2 | 11730.3 | 12635.9 | Down |
| Olfr1372- | 284.541 | 1.08707 | 0.29988 | 3.62504 | 0.00029  | 0.00192  | 277.673 | 131.281 | 137.503 | 394.989 | 412.906 | 352.896 | Up   |
| Tcf7      | 1725.37 | -0.6393 | 0.15695 | -4.0734 | 4.63E-05 | 0.00038  | 1875.02 | 1849.44 | 2580.09 | 1323.89 | 1345.38 | 1378.4  | Down |
| A630014C  | 50.0021 | -1.0471 | 0.4942  | -2.1187 | 0.03412  | 0.10118  | 41.6026 | 46.9547 | 113.631 | 36.2851 | 25.3446 | 36.1944 | Down |
| Vdac1     | 10385.9 | -0.2892 | 0.1403  | -2.0613 | 0.03927  | 0.11287  | 11309.1 | 13337   | 9624.26 | 9407.16 | 8742.83 | 9895.16 | Down |
| Zcchc10   | 700.939 | -0.2758 | 0.13144 | -2.098  | 0.00359  | 0.1053   | 823.344 | 710.07  | 769.636 | 608.552 | 693.809 | 600.224 | Down |
| A430108C  | 222.984 | -0.8393 | 0.24341 | -3.4481 | 0.00056  | 0.00343  | 264.128 | 325.808 | 268.322 | 207.343 | 122.499 | 149.805 | Down |
| Il4       | 742.979 | -0.5285 | 0.1662  | -3.1799 | 0.00147  | 0.00773  | 775.936 | 984.132 | 872.763 | 669.718 | 505.836 | 649.489 | Down |
| Gm12216   | 930.02  | -0.4955 | 0.17759 | -2.79   | 0.00527  | 0.02265  | 904.614 | 1137.45 | 1222.25 | 684.232 | 918.742 | 712.829 | Down |
| Slc22a5   | 2959.77 | -0.3413 | 0.08134 | -4.196  | 2.72E-05 | 0.00024  | 3304.02 | 3380.74 | 3239.92 | 2634.29 | 2658.02 | 2541.65 | Down |
| Pdlim4    | 232.439 | -1.8847 | 0.30677 | -6.1437 | 8.06E-10 | 1.80E-08 | 317.34  | 535.667 | 244.45  | 96.4146 | 98.2104 | 102.551 | Down |
| Csf2      | 72.272  | 1.90884 | 0.33887 | 5.63302 | 1.77E-08 | 3.05E-07 | 25.155  | 32.5808 | 33.4209 | 143.067 | 111.939 | 87.4699 | Up   |
| Acsf6     | 34.0087 | -2.6709 | 0.80765 | -3.307  | 0.00094  | 0.00531  | 21.285  | 119.782 | 35.3307 | 13.4773 | 2.11205 | 12.0648 | Down |
| Cdc42se2  | 7387.49 | 0.46504 | 0.07648 | 6.08042 | 1.20E-09 | 2.62E-08 | 6412.6  | 6083.03 | 6125.57 | 8365.26 | 8626.67 | 8711.8  | Up   |
| Lymr7     | 238.742 | -0.7202 | 0.356   | -2.0231 | 0.04306  | 0.12144  | 157.703 | 380.429 | 353.307 | 134.773 | 168.964 | 237.275 | Down |
| Gpx3      | 59074.5 | -0.6983 | 0.16725 | -4.1749 | 2.98E-05 | 0.00026  | 61922   | 91719.7 | 65652   | 46415.8 | 48226.6 | 40510.6 | Down |
| Tnfp1     | 2639.26 | 0.59188 | 0.14652 | 4.03966 | 5.35E-05 | 0.00044  | 2443.91 | 1891.6  | 1980.43 | 3370.36 | 3381.39 | 2767.87 | Up   |
| Gm2a      | 6627.91 | 0.62141 | 0.11601 | 5.35639 | 8.49E-08 | 1.27E-06 | 5805.98 | 5285.75 | 4574.84 | 8297.87 | 7908.57 | 7894.41 | Up   |
| Atp5pb-p  | 329.765 | 0.35944 | 0.17638 | 2.03784 | 0.04157  | 0.11813  | 243.81  | 324.85  | 297.923 | 392.915 | 382.281 | 336.809 | Up   |
| Slc36a2   | 2276.37 | -0.7169 | 0.14139 | -5.0703 | 3.97E-07 | 5.34E-06 | 2594.84 | 3377.86 | 2518.98 | 1733.39 | 1733.99 | 1699.13 | Down |
| Slc36a1   | 1698.92 | 0.54779 | 0.10227 | 5.35635 | 8.49E-08 | 1.27E-06 | 1426.1  | 1345.4  | 1369.3  | 1915.85 | 1964.21 | 2172.67 | Up   |
| Atox1     | 1948.81 | 0.37176 | 0.10905 | 3.4092  | 0.00065  | 0.00388  | 1698.93 | 1569.63 | 1828.6  | 2165.7  | 2332.76 | 2097.27 | Up   |
| Gria1     | 793.558 | -1.8902 | 0.20687 | -9.1371 | 6.42E-20 | 5.53E-18 | 950.086 | 1290.77 | 1508.71 | 313.088 | 397.066 | 301.62  | Down |
| Larp1     | 5912.16 | 0.22657 | 0.11406 | 1.98643 | 0.04699  | 0.13002  | 4977.8  | 5401.7  | 5967.06 | 5832.56 | 6678.3  | 6615.54 | Up   |
| Mrp122    | 879.34  | -0.3354 | 0.13698 | -2.4486 | 0.01434  | 0.05121  | 851.401 | 988.923 | 1102.89 | 789.977 | 787.795 | 755.056 | Down |
| Zfp692    | 1327.71 | -0.3498 | 0.12765 | -2.7404 | 0.00614  | 0.02564  | 1295.48 | 1553.34 | 1614.71 | 1207.77 | 1188.03 | 1106.95 | Down |
| Lypd8     | 97.0439 | 4.59282 | 1.17471 | 3.90977 | 9.24E-05 | 0.00071  | 20.3175 | 0.95826 | 1.90977 | 234.298 | 105.603 | 219.177 | Up   |
| 2210407C  | 604.783 | 7.17226 | 0.79877 | 8.97916 | 2.73E-19 | 2.23E-17 | 9.67501 | 10.5408 | 4.77441 | 1235.77 | 2018.06 | 349.88  | Up   |
| Olfr323   | 9.947   | 6.81435 | 1.61003 | 4.23245 | 2.31E-05 | 0.00021  | 0       | 0       | 0       | 16.5875 | 39.0729 | 4.0216  | Up   |
| Olfr317   | 9.00159 | -3.246  | 1.05758 | -3.0693 | 0.00215  | 0.01057  | 5.80501 | 26.8312 | 16.233  | 2.07343 | 1.05603 | 2.0108  | Down |
| Olfr316   | 6.7867  | -3.137  | 1.13513 | -2.7636 | 0.00572  | 0.02424  | 15.48   | 13.4156 | 7.63906 | 2.07343 | 2.11205 | 0       | Down |
| Fam183b   | 2259.82 | -0.6522 | 0.1722  | -3.7871 | 0.00015  | 0.0011   | 2861.87 | 2632.34 | 2792.08 | 2192.65 | 1393.95 | 1686.06 | Down |
| Gm12258   | 360.98  | -0.7579 | 0.19696 | -3.8481 | 0.00012  | 0.00089  | 424.733 | 392.886 | 543.328 | 233.261 | 306.247 | 265.426 | Down |
| Zfp39     | 247.642 | -0.6183 | 0.24735 | -2.4995 | 0.01244  | 0.04568  | 226.395 | 327.724 | 345.668 | 156.544 | 193.253 | 236.269 | Down |
| Rnf187    | 8294.44 | -0.2897 | 0.10531 | -2.7506 | 0.00595  | 0.025    | 8345.67 | 9223.24 | 9803.78 | 7335.8  | 7975.1  | 7083.05 | Down |
| Obscn     | 1341.34 | -4.2162 | 0.67173 | -6.2766 | 3.46E-10 | 8.28E-09 | 1599.28 | 4659.05 | 1378.85 | 96.4146 | 99.2664 | 215.156 | Down |
| Gjc2      | 91.4348 | -1.086  | 0.38843 | -2.796  | 0.00517  | 0.02233  | 164.475 | 81.452  | 126.999 | 83.974  | 46.4651 | 45.243  | Down |
| Zfp867    | 712.908 | -0.249  | 0.10984 | -2.2666 | 0.02341  | 0.07566  | 787.546 | 743.609 | 791.598 | 666.608 | 653.68  | 634.408 | Down |
| Nlrp3     | 324.495 | 1.35097 | 0.30855 | 4.37844 | 1.20E-05 | 0.00011  | 265.095 | 164.82  | 118.405 | 440.604 | 585.038 | 373.004 | Up   |
| Flcn      | 4408.77 | 0.20644 | 0.07598 | 2.71708 | 0.00659  | 0.02712  | 4148.65 | 4124.35 | 4008.6  | 4806.21 | 4708.82 | 4656.01 | Up   |
| Gm12714   | 5.60993 | 3.41897 | 1.21263 | 2.81946 | 0.00481  | 0.021    | 0.9675  | 0.95826 | 0.95488 | 10.3672 | 6.33615 | 14.0756 | Up   |
| Srebfl    | 6483.3  | 0.56794 | 0.08713 | 6.51851 | 7.10E-11 | 1.92E-09 | 5335.77 | 5351.87 | 4982.58 | 8151.7  | 7589.65 | 7488.23 | Up   |
| Tom1l2    | 4539.84 | -0.282  | 0.11964 | -2.3566 | 0.01844  | 0.06269  | 4301.51 | 5287.67 | 5356.89 | 3922.93 | 4216.71 | 4153.31 | Down |
| Drc3      | 3558.14 | -0.5349 | 0.24871 | -2.1508 | 0.03149  | 0.09516  | 3498.49 | 4919.7  | 4212.94 | 3188.94 | 1804.75 | 3724    | Down |
| Gid4      | 3211.4  | -0.4806 | 0.09855 | -4.8771 | 1.08E-06 | 1.32E-05 | 3943.54 | 3674.92 | 3605.64 | 2637.41 | 2870.28 | 2536.63 | Down |
| Myo15     | 142.818 | 1.22925 | 0.27468 | 4.47523 | 7.63E-06 | 7.75E-05 | 81.2701 | 72.8277 | 102.172 | 208.38  | 149.956 | 242.302 | Up   |
| Flii      | 9013.45 | 0.21577 | 0.08538 | 2.52727 | 0.0115   | 0.0429   | 8282.78 | 7883.59 | 8855.58 | 9606.21 | 9815.76 | 9636.77 | Up   |
| Smcr8     | 2023.82 | 0.34499 | 0.10983 | 3.14113 | 0.00168  | 0.00862  | 1896.3  | 1604.12 | 1848.65 | 2211.31 | 2202.82 | 2361.69 | Up   |
| Shmt1     | 1150.41 | 0.53457 | 0.1196  | 4.46982 | 7.83E-06 | 7.90E-05 | 1039.1  | 854.767 | 925.282 | 1315.59 | 1360.16 | 1407.56 | Up   |
| Dhrs7b    | 1719.33 | 0.49159 | 0.12882 | 3.81614 | 0.00014  | 0.00099  | 15      |         |         |         |         |         |      |

|          |         |         |         |         |          |          |         |         |         |         |         |         |      |
|----------|---------|---------|---------|---------|----------|----------|---------|---------|---------|---------|---------|---------|------|
| Mfap4    | 29697.3 | -0.5728 | 0.15485 | -3.6992 | 0.00022  | 0.00149  | 29173.1 | 42745   | 34631.7 | 25642.1 | 24049.9 | 21941.9 | Down |
| Grap     | 4027.61 | -0.4829 | 0.12707 | -3.8    | 0.00014  | 0.00105  | 4584.02 | 4291.08 | 5210.8  | 3523.8  | 3580.98 | 2974.98 | Down |
| Akap10   | 1600.87 | 0.32309 | 0.11455 | 2.82047 | 0.0048   | 0.02094  | 1502.53 | 1351.14 | 1413.23 | 1785.22 | 1929.36 | 1623.72 | Up   |
| Specc1   | 2754.69 | 0.50057 | 0.1351  | 3.70517 | 0.00021  | 0.00146  | 2444.88 | 2022.88 | 2376.7  | 2979.52 | 3672.86 | 3031.28 | Up   |
| Adora2b  | 1878.33 | 1.74545 | 0.10893 | 16.0232 | 8.80E-58 | 1.36E-54 | 811.734 | 861.475 | 915.733 | 2686.13 | 3056.14 | 2938.79 | Up   |
| Zswim7   | 479.913 | 0.49499 | 0.1605  | 3.08408 | 0.00204  | 0.01013  | 353.138 | 442.715 | 399.141 | 548.423 | 628.335 | 507.727 | Up   |
| Ncor1    | 2677.42 | 0.28891 | 0.13104 | 2.20476 | 0.02747  | 0.08579  | 2737.06 | 2217.41 | 2276.44 | 2862.37 | 2729.83 | 3241.41 | Up   |
| Ubb      | 36941.2 | 0.23797 | 0.09298 | 2.55936 | 0.01049  | 0.03978  | 32704.5 | 34176.3 | 34823.6 | 43336.8 | 37763.5 | 38842.7 | Up   |
| Trpv2    | 1366.15 | 1.08328 | 0.1873  | 5.78368 | 7.31E-09 | 1.36E-07 | 1049.74 | 802.062 | 776.32  | 1814.25 | 2230.33 | 1524.19 | Up   |
| Mmgt2    | 1160.82 | 0.42486 | 0.12514 | 3.39497 | 0.00069  | 0.00406  | 1049.74 | 923.761 | 999.762 | 1459.7  | 1328.48 | 1203.46 | Up   |
| Fbxw10   | 112.603 | 0.70044 | 0.28708 | 2.43989 | 0.01469  | 0.05217  | 85.1401 | 101.575 | 70.6613 | 178.315 | 118.275 | 121.654 | Up   |
| Pmp22    | 27538   | -0.4536 | 0.11408 | -3.9763 | 7.00E-05 | 0.00055  | 30074.8 | 30947   | 34474.1 | 24654.1 | 24433.3 | 20644.9 | Down |
| Hmgb1-p  | 39.9153 | 0.79789 | 0.38962 | 2.04789 | 0.04057  | 0.11577  | 32.895  | 33.5391 | 21.0074 | 48.7256 | 58.0814 | 45.243  | Up   |
| Hs3st3b1 | 761.388 | 0.50094 | 0.20141 | 2.48717 | 0.01288  | 0.04698  | 660.804 | 557.707 | 673.192 | 966.219 | 654.736 | 1055.67 | Up   |
| 2810001G | 360.992 | -0.8836 | 0.19946 | -4.4298 | 9.43E-06 | 9.31E-05 | 557.281 | 367.013 | 480.306 | 270.583 | 254.502 | 236.269 | Down |
| Gm12290  | 6.15015 | -2.6092 | 1.14199 | -2.2848 | 0.02233  | 0.07273  | 8.70751 | 15.3321 | 7.63906 | 3.11015 | 2.11205 | 0       | Down |
| Arhgap44 | 3845.53 | 0.61979 | 0.09941 | 6.23449 | 4.53E-10 | 1.06E-08 | 3304.99 | 2892.98 | 2898.07 | 4827.99 | 4530.35 | 4618.81 | Up   |
| Myocd    | 91.9389 | -2.4647 | 0.40756 | -6.0474 | 1.47E-09 | 3.17E-08 | 91.9126 | 229.024 | 146.097 | 22.8077 | 30.6247 | 31.1674 | Down |
| Gm12295  | 81.0559 | -4.2924 | 0.64183 | -6.6878 | 2.27E-11 | 6.70E-10 | 117.068 | 286.519 | 59.2027 | 7.25701 | 4.2241  | 12.0648 | Down |
| Map2k4   | 3500.46 | 0.48976 | 0.08305 | 5.89736 | 3.69E-09 | 7.36E-08 | 2924.76 | 2853.69 | 2957.27 | 3942.63 | 4250.5  | 4073.88 | Up   |
| Dnah9    | 2841.91 | -0.6198 | 0.24573 | -2.5222 | 0.01166  | 0.04337  | 3106.65 | 4149.26 | 3073.77 | 2197.84 | 1481.6  | 3042.34 | Down |
| Shisa6   | 30.5469 | -1.1922 | 0.50611 | -2.3556 | 0.01849  | 0.06282  | 23.22   | 45.9964 | 58.2479 | 18.6609 | 20.0645 | 17.0918 | Down |
| Adprm    | 1789.65 | -0.2556 | 0.11082 | -2.3066 | 0.02108  | 0.06948  | 1758.92 | 1976.89 | 2107.43 | 1672.22 | 1638.95 | 1583.51 | Down |
| Sco1     | 782.512 | 0.5845  | 0.11606 | 5.03637 | 4.74E-07 | 6.28E-06 | 654.998 | 610.411 | 613.035 | 872.915 | 970.487 | 973.228 | Up   |
| Myh8     | 6.905   | -4.2379 | 1.58204 | -2.6788 | 0.00739  | 0.02982  | 4.83751 | 29.706  | 4.77441 | 0       | 2.11205 | 0       | Down |
| Myh13    | 72.2733 | 1.21744 | 0.38725 | 3.14382 | 0.00167  | 0.00855  | 25.155  | 44.0799 | 61.1125 | 92.2677 | 123.555 | 87.4699 | Up   |
| Dhrs7c   | 332.354 | -5.5556 | 1.22945 | -4.5188 | 6.22E-06 | 6.43E-05 | 400.546 | 1207.41 | 344.713 | 6.2203  | 1.05603 | 34.1836 | Down |
| Pik3r5   | 1483.66 | 1.49038 | 0.1398  | 10.6611 | 1.55E-26 | 2.40E-24 | 907.516 | 756.066 | 673.192 | 2112.83 | 2295.8  | 2156.58 | Up   |
| Pik3r6   | 819.084 | 0.57353 | 0.14783 | 3.87956 | 0.0001   | 0.00079  | 732.399 | 667.906 | 574.84  | 895.722 | 1083.48 | 960.158 | Up   |
| Mfsd6l   | 458.062 | -0.5009 | 0.2231  | -2.2454 | 0.02474  | 0.07899  | 473.108 | 592.204 | 545.238 | 433.347 | 266.118 | 438.355 | Down |
| Myh10    | 8256.12 | -0.6634 | 0.12772 | -5.1939 | 2.06E-07 | 2.91E-06 | 10130.7 | 10207.4 | 10026.3 | 6057.53 | 7474.55 | 5640.3  | Down |
| Arhgef15 | 7129.37 | -0.3544 | 0.13024 | -2.7211 | 0.00651  | 0.02687  | 7887.07 | 7388.17 | 8726.67 | 5531.92 | 7115.5  | 6126.91 | Down |
| Slc25a35 | 1117.07 | 0.58464 | 0.16934 | 3.45241 | 0.00056  | 0.00339  | 729.496 | 1100.08 | 851.756 | 1332.18 | 1289.41 | 1399.52 | Up   |
| Pfas     | 865.369 | -0.2696 | 0.10621 | -2.5382 | 0.01114  | 0.04175  | 919.126 | 922.803 | 995.943 | 784.794 | 799.411 | 770.137 | Down |
| Aurkb    | 132.616 | 1.09621 | 0.27032 | 4.0553  | 5.01E-05 | 0.00041  | 85.1401 | 108.283 | 60.1576 | 192.829 | 176.356 | 172.929 | Up   |
| Tmem107  | 1661.3  | -0.6737 | 0.17649 | -3.8174 | 0.00013  | 0.00099  | 1944.68 | 2200.16 | 1982.34 | 1399.57 | 963.095 | 1477.94 | Down |
| Vamp2    | 7444.25 | -0.356  | 0.07854 | -4.533  | 5.81E-06 | 6.05E-05 | 8545.94 | 8227.61 | 8300.8  | 6606.99 | 6719.49 | 6264.65 | Down |
| Chd3     | 7579.16 | 0.89471 | 0.08229 | 10.8729 | 1.55E-27 | 2.70E-25 | 5383.18 | 5050.02 | 5471.48 | 9564.74 | 9880.17 | 10125.4 | Up   |
| Tmem88   | 579.021 | -0.5424 | 0.18246 | -2.9725 | 0.00295  | 0.01388  | 559.216 | 653.532 | 846.981 | 457.192 | 483.66  | 473.544 | Down |
| Dnah2    | 1889.71 | -0.4974 | 0.20101 | -2.4747 | 0.01334  | 0.04835  | 1844.06 | 2297.9  | 2495.11 | 1738.57 | 1146.84 | 1815.75 | Down |
| Atp1b2   | 485.76  | -0.7736 | 0.14819 | -5.2204 | 1.79E-07 | 2.55E-06 | 605.656 | 639.159 | 593.937 | 319.308 | 407.626 | 348.874 | Down |
| Sat2     | 155.46  | -0.554  | 0.24621 | -2.2501 | 0.02444  | 0.07818  | 160.605 | 190.693 | 203.39  | 116.112 | 158.404 | 103.556 | Down |
| Mpdu1    | 2842.8  | 0.3481  | 0.10512 | 3.31149 | 0.00093  | 0.00524  | 2538.72 | 2473.27 | 2492.24 | 3238.7  | 3438.42 | 2875.45 | Up   |
| Cd68     | 5412.79 | 2.94262 | 0.47995 | 6.13106 | 8.73E-10 | 1.94E-08 | 1971.77 | 1031.09 | 735.26  | 8830.75 | 12289   | 7618.93 | Up   |
| Eif4a1   | 15668.9 | 0.36697 | 0.11312 | 3.24406 | 0.00118  | 0.0064   | 14385.8 | 12143.1 | 14531.4 | 17821.1 | 18714.9 | 16417.2 | Up   |
| Polr2a   | 5594.46 | 0.28223 | 0.09714 | 2.90544 | 0.00367  | 0.01669  | 5282.56 | 4724.22 | 5140.13 | 5818.05 | 6525.18 | 676.64  | Up   |
| Slc35g3  | 139.71  | -1.494  | 0.40005 | -3.7345 | 0.00019  | 0.00133  | 133.515 | 311.434 | 173.789 | 59.0928 | 53.8573 | 106.572 | Down |
| Tmem102  | 848.44  | 0.97006 | 0.14655 | 6.61926 | 3.61E-11 | 1.02E-09 | 526.321 | 652.574 | 541.419 | 1180.82 | 1190.14 | 999.368 | Up   |
| Tnk1     | 697.924 | 0.37747 | 0.15909 | 2.37273 | 0.01766  | 0.06049  | 636.616 | 499.253 | 685.606 | 750.582 | 771.955 | 843.531 | Up   |
| Acap1    | 886.103 | -0.345  | 0.12728 | -2.711  | 0.00671  | 0.02753  | 1074.89 | 923.761 | 975.89  | 812.785 | 819.476 | 709.813 | Down |
| Eif5a    | 18600.3 | 0.22603 | 0.11316 | 1.9974  | 0.04578  | 0.12731  | 16642   | 17705.7 | 17090.5 | 20537.3 | 22066.7 | 17559.3 | Up   |
| Slc2a4   | 673.429 | -3.8037 | 0.65616 | -5.7969 | 6.76E-09 | 1.27E-07 | 787.546 | 2433.02 | 550.013 | 92.2677 | 79.2019 | 98.5293 | Down |
| Cldn7    | 4614.24 | 0.40545 | 0.11863 | 3.41789 | 0.00063  | 0.00378  | 3444.31 | 4285.33 | 4180.48 | 5485.26 | 5259.01 | 5031.03 | Up   |
| Gabarap  | 18008.6 | 0.40411 | 0.10452 | 3.86638 | 0.00011  | 0.00083  | 17078.3 | 14781.1 | 14648.9 | 20514.5 | 21628.5 | 19400.2 | Up   |
| Dlg4     | 1811.72 | -0.453  | 0.11129 | -4.0702 | 4.70E-05 | 0.00039  | 2291.04 | 1891.6  | 2098.83 | 1522.94 | 1540.74 | 1525.19 | Down |
| Asgr1    | 228.101 | -3.3313 | 0.42515 | -7.8355 | 4.67E-15 | 2.38E-13 | 306.698 | 484.879 | 453.569 | 27.9913 | 20.0645 | 75.4051 | Down |
| Asgr2    | 76.0117 | 0.88425 | 0.38325 | 2.30726 | 0.02104  | 0.06939  | 52.2451 | 46.9547 | 61.1125 | 118.186 | 54.9133 | 122.659 | Up   |
| Mgl2     | 1243.17 | 0.51717 | 0.1844  | 2.80457 | 0.00504  | 0.02187  | 778.839 | 1209.32 | 1079.97 | 1349.8  | 1400.29 | 1640.81 | Up   |
| Clec10a  | 243.23  | -1.104  | 0.33402 | -3.3054 | 0.00095  | 0.00534  | 321.21  | 480.088 | 194.796 | 170.021 | 119.331 | 173.934 | Down |
| Slc16a11 | 4168.05 | -0.5648 | 0.20191 | -2.7973 | 0.00515  | 0.02225  | 4458.25 | 5998.7  | 4464.08 | 4147.9  | 2526.01 | 3413.34 | Down |
| Bcl6b    | 1795.47 | 0.37846 | 0.18179 | 2.0818  | 0.03736  | 0.10864  | 1488.02 | 1361.69 | 1834.33 | 1666    | 1971.6  | 2451.17 | Up   |
| Alox12   | 511.131 | -1.3539 | 0.23587 | -5.74   | 9.47E-09 | 1.73E-07 | 507.938 | 959.217 | 737.17  | 278.877 | 303.079 | 280.507 | Down |
| Alox12e  | 86.0271 | 0.32038 | 0.76352 | 3.95586 | 7.63E-05 | 0.0006   | 11.61   | 43.1216 | 1.90977 | 152.397 | 72.8658 | 234.258 | Up   |
| Arrb2    | 2130.25 | 0.51568 | 0.15076 | 3.42065 | 0.00062  | 0.00375  | 2083.03 | 1537.05 | 1640.49 | 2420.73 | 2764.67 | 2335.55 | Up   |
| Cxcl16   | 5042.21 | 0.97053 | 0.08822 | 11.0011 | 3.77E-28 | 6.78E-26 | 3458.82 | 3209.21 | 3554.07 | 6641.2  | 6900.07 | 6489.86 | Up   |
| Zmynd15  | 695.793 | 1.30501 | 0.2262  | 5.7694  | 7.96E-09 | 1.47E-07 | 406.351 | 321.017 | 475.532 | 929.934 | 775.123 | 1266.81 | Up   |
| Pld2     | 2708.77 | 0.63606 | 0.09551 | 6.65978 | 2.74E-11 | 8.03E-10 | 2232.99 | 2031.51 | 2098.83 | 3436.71 | 3332.82 | 3119.76 | Up   |
| Mink1    | 3447.07 | 0.27779 | 0.09595 | 2.89521 | 0.00379  | 0.01717  | 3028.28 | 2973.48 | 3346.86 | 3623.32 | 3902.01 | 3808.46 | Up   |
| Gp1ba    | 88.2659 | -1.031  | 0.51273 | -2.0108 | 0.04435  | 0.12415  | 46.4401 | 208.9   | 100.263 | 66.3498 | 43.297  | 64.3457 | Down |
| Rnf167   | 5208.74 | -0.5027 | 0.08649 | -5.8125 | 6.16E-09 | 1.16E-07 | 6064.3  | 5987.2  | 6269.76 | 4456.84 | 4421.58 | 4052.77 | Down |
| Pfn1     | 19603   | 0.64013 | 0.1286  | 4.97776 | 6.43E-07 | 8.32E-06 | 15736.4 | 14613.4 | 15621.9 | 24917.5 | 26649.9 | 20078.9 | Up   |
| Eno3     | 2477.93 | -2.1987 | 0.30074 | -7.311  | 2.65E-13 | 1.05E-11 | 2904.44 | 6595.69 | 2708.05 | 944.448 | 896.566 | 818.396 | Down |
| Kif1c    | 11013.5 | 0.32692 | 0.08562 | 3.81832 | 0.00013  | 0.00098  | 9729.19 | 9963.02 | 9620.45 | 12310   | 12941.6 | 11516.9 | Up   |
| Scimp    | 372.697 | 1.99573 | 0.30606 | 6.52066 | 7.00E-11 | 1.90E-09 | 232.2   | 98.7006 | 117.451 | 535.982 | 673.744 | 578.105 | Up   |
| C1qbp    | 2171.68 | -0.2181 | 0.09179 | -2.3758 | 0.01751  | 0.06005  | 2396.5  | 2410.02 | 2200.05 | 2050.62 | 1983.22 | 1989.69 | Down |
| Derl2    | 4950.88 | 0.28717 | 0.08476 | 3.38812 | 0.0007   | 0.00415  | 4351.82 | 4316.96 | 4710.44 | 5331.83 | 5561.03 | 5433.19 | Up   |
| Mis12    | 1330.14 | 0.28651 | 0.12671 | 2.2611  | 0.02375  | 0.076    |         |         |         |         |         |         |      |

|           |         |         |         |         |          |          |         |         |         |         |         |         |      |
|-----------|---------|---------|---------|---------|----------|----------|---------|---------|---------|---------|---------|---------|------|
| Xaf1      | 2738.33 | 0.38965 | 0.17986 | 2.16637 | 0.03028  | 0.09239  | 2836.71 | 2312.28 | 1963.24 | 3258.4  | 3519.73 | 2539.64 | Up   |
| Smtnl2    | 1469.86 | -0.5318 | 0.16491 | -3.2249 | 0.00126  | 0.00678  | 2101.41 | 1569.63 | 1542.14 | 1328.03 | 1210.21 | 1067.74 | Down |
| Spns3     | 81.1136 | 1.53191 | 0.42543 | 3.6008  | 0.00032  | 0.00208  | 63.8551 | 39.2886 | 21.9623 | 148.25  | 87.6501 | 125.675 | Up   |
| Zzef1     | 3102.1  | 0.29948 | 0.10113 | 2.96152 | 0.00306  | 0.01433  | 2922.82 | 2714.75 | 2706.14 | 3257.36 | 3709.82 | 3301.74 | Up   |
| P2rx1     | 129.323 | -0.7725 | 0.33616 | -2.298  | 0.02156  | 0.07071  | 124.808 | 185.902 | 178.563 | 89.1576 | 135.171 | 62.3349 | Down |
| Itgae     | 528.376 | 1.31495 | 0.27286 | 4.81905 | 1.44E-06 | 1.72E-05 | 451.823 | 208.9   | 248.27  | 793.088 | 719.153 | 749.024 | Up   |
| P2rx5     | 588.098 | 1.3789  | 0.15608 | 8.83436 | 1.01E-18 | 7.95E-17 | 282.51  | 344.015 | 353.307 | 843.887 | 937.751 | 767.121 | Up   |
| Emc6      | 4153.83 | 0.43433 | 0.09161 | 4.74135 | 2.12E-06 | 2.43E-05 | 3631.03 | 3478.48 | 3490.1  | 5062.28 | 4789.08 | 4472.02 | Up   |
| Tax1bp3   | 3799.82 | 0.77768 | 0.09722 | 7.99889 | 1.26E-15 | 6.87E-14 | 3006.03 | 2728.16 | 2665.08 | 4873.6  | 4967.54 | 4558.49 | Up   |
| Ctns      | 1514.3  | 0.42691 | 0.11977 | 3.56453 | 0.00036  | 0.00235  | 1428.03 | 1193.99 | 1253.76 | 1640.08 | 1714.99 | 1854.96 | Up   |
| Aspa      | 841.954 | -0.4309 | 0.18977 | -2.2706 | 0.02317  | 0.07505  | 865.914 | 1165.24 | 868.943 | 658.315 | 865.941 | 627.37  | Down |
| Rap1gap2  | 652.64  | -0.5926 | 0.20376 | -2.9082 | 0.00364  | 0.01658  | 652.096 | 1031.09 | 671.283 | 499.697 | 523.789 | 537.889 | Down |
| Sgsm2     | 1718.28 | 0.36302 | 0.09454 | 3.83992 | 0.00012  | 0.00091  | 1480.28 | 1477.63 | 1551.68 | 1845.35 | 2023.34 | 1931.38 | Up   |
| Rpa1      | 3518.86 | -0.3084 | 0.09853 | -3.1304 | 0.00175  | 0.00889  | 3940.63 | 4038.1  | 3702.08 | 3387.99 | 2997    | 3047.37 | Down |
| Serpinf1  | 3032.99 | 0.65312 | 0.19822 | 3.29497 | 0.00098  | 0.00551  | 2054.97 | 2968.69 | 2050.13 | 4557.4  | 3344.43 | 3222.31 | Up   |
| Wdr81     | 2674.07 | 0.68866 | 0.11122 | 6.19192 | 5.94E-10 | 1.36E-08 | 2200.1  | 1939.52 | 2003.34 | 3450.19 | 3452.15 | 2999.11 | Up   |
| Rilp      | 1113.42 | 0.36601 | 0.12596 | 2.90581 | 0.00366  | 0.01667  | 861.076 | 1027.25 | 1030.32 | 1227.47 | 1337.98 | 1196.43 | Up   |
| Myo1c     | 19927   | 0.31084 | 0.14718 | 2.11195 | 0.03469  | 0.10253  | 20299.1 | 14560.7 | 18505.6 | 21955.6 | 24040.4 | 20200.5 | Up   |
| Doc2b     | 112.433 | -1.62   | 0.30059 | -5.3894 | 7.07E-08 | 1.08E-06 | 189.63  | 169.612 | 149.917 | 61.1662 | 35.9049 | 68.3673 | Down |
| Vps53     | 2511.26 | 0.49474 | 0.0896  | 5.52188 | 3.35E-08 | 5.49E-07 | 2054.01 | 2119.67 | 2080.69 | 3058.31 | 2976.94 | 2777.92 | Up   |
| Nxn       | 1519.5  | -0.5855 | 0.10275 | -5.6984 | 1.21E-08 | 2.15E-07 | 1725.06 | 1843.69 | 1902.13 | 1273.09 | 1222.88 | 1150.18 | Down |
| Abr       | 6438.48 | 0.53618 | 0.12289 | 4.36323 | 1.28E-05 | 0.00012  | 5809.85 | 5264.67 | 4692.29 | 7487.16 | 8332.04 | 7044.84 | Up   |
| Trarg1    | 689.768 | -1.3522 | 0.20405 | -6.6268 | 3.43E-11 | 9.79E-10 | 846.564 | 1257.24 | 869.898 | 446.825 | 382.281 | 335.804 | Down |
| Ssh2      | 5019.81 | -0.2389 | 0.11685 | -2.0444 | 0.04091  | 0.11658  | 4752.37 | 5924.91 | 5626.17 | 4557.4  | 4431.08 | 4826.93 | Down |
| Coro6     | 865.933 | -1.446  | 0.2965  | -4.8767 | 1.08E-06 | 1.32E-05 | 863.979 | 1986.47 | 950.108 | 509.027 | 466.763 | 419.252 | Down |
| Git1      | 5073.85 | -0.269  | 0.1357  | -1.9823 | 0.04744  | 0.13102  | 4848.15 | 5441.95 | 6346.15 | 4550.15 | 5033.02 | 4223.69 | Down |
| Trp53i13  | 1041.12 | -0.5112 | 0.1442  | -3.545  | 0.00039  | 0.00251  | 1280.97 | 1274.48 | 1115.3  | 901.944 | 904.087 | 729.921 | Down |
| Taok1     | 132.062 | 0.54203 | 0.21155 | 2.56217 | 0.0104   | 0.0395   | 107.393 | 106.367 | 108.857 | 138.92  | 168.964 | 161.87  | Up   |
| Myo18a    | 6379.96 | 0.4399  | 0.0901  | 4.8824  | 1.05E-06 | 1.29E-05 | 5507.02 | 5068.23 | 5669.14 | 7518.26 | 7050.03 | 7467.11 | Up   |
| Phf12     | 3452.72 | 0.21477 | 0.0916  | 2.34453 | 0.01905  | 0.06426  | 3332.08 | 2991.68 | 3264.74 | 3665.83 | 3835.48 | 3626.48 | Up   |
| Flot2     | 5725.38 | 0.45949 | 0.11853 | 3.87673 | 0.00011  | 0.0008   | 5329.97 | 4682.05 | 4451.66 | 6463.92 | 7268.62 | 6156.07 | Up   |
| Traf4     | 1358.54 | 0.36891 | 0.10636 | 3.46838 | 0.00052  | 0.00323  | 1244.21 | 1182.49 | 1130.58 | 1613.13 | 1548.13 | 1432.7  | Up   |
| Tlcd1     | 895.185 | 0.27854 | 0.11451 | 2.43241 | 0.015    | 0.05305  | 869.784 | 804.937 | 752.448 | 1017.02 | 955.703 | 971.217 | Up   |
| 2610507B  | 9433.22 | 0.33463 | 0.08486 | 3.94355 | 8.03E-05 | 0.00063  | 8261.5  | 8496.88 | 8274.06 | 9956.62 | 10469.4 | 11140.8 | Up   |
| Spag5     | 138.093 | 0.69812 | 0.21493 | 3.24815 | 0.00116  | 0.00632  | 113.198 | 107.325 | 95.4883 | 184.535 | 152.068 | 175.945 | Up   |
| Aldoc     | 1399.41 | 2.71923 | 0.24328 | 11.1776 | 5.25E-29 | 9.76E-27 | 521.483 | 329.641 | 255.909 | 2330.54 | 2774.18 | 2184.74 | Up   |
| Pigs      | 3385.02 | 0.63783 | 0.1116  | 5.71509 | 1.10E-08 | 1.96E-07 | 2926.69 | 2591.13 | 2428.27 | 4046.3  | 4363.5  | 3954.24 | Up   |
| Unc119    | 1809.21 | 1.19217 | 0.20796 | 5.73281 | 9.88E-09 | 1.79E-07 | 1371.92 | 1051.21 | 881.357 | 2567.95 | 3000.17 | 1982.65 | Up   |
| Slc13a2os | 5.4408  | 4.00237 | 1.48291 | 2.69899 | 0.00696  | 0.02838  | 0       | 1.91652 | 0       | 10.3672 | 5.28013 | 15.081  | Up   |
| Slc13a2   | 30.3207 | 3.54134 | 0.61938 | 5.71756 | 1.08E-08 | 1.94E-07 | 2.9025  | 7.66607 | 3.81953 | 67.3865 | 33.7928 | 66.3565 | Up   |
| Slc46a1   | 373.125 | 0.38233 | 0.15105 | 2.53122 | 0.01137  | 0.04247  | 333.788 | 348.806 | 289.33  | 448.898 | 409.738 | 408.193 | Up   |
| Vtn       | 819.174 | -1.0849 | 0.18527 | -5.8557 | 4.75E-09 | 9.26E-08 | 982.014 | 968.799 | 1389.35 | 526.652 | 578.702 | 469.522 | Down |
| Tmem199   | 1145.78 | 0.258   | 0.10375 | 2.48679 | 0.01289  | 0.04702  | 1075.86 | 1076.12 | 978.755 | 1259.61 | 1278.85 | 1205.48 | Up   |
| Tnfaip1   | 9683.56 | 0.29376 | 0.10378 | 2.8305  | 0.00465  | 0.0204   | 8579.8  | 7966    | 9557.42 | 10319.5 | 10574   | 11104.7 | Up   |
| Tmem97    | 1373.39 | 0.23155 | 0.09689 | 2.38972 | 0.01686  | 0.05834  | 1279.04 | 1308.98 | 1202.2  | 1525.01 | 1476.32 | 1448.78 | Up   |
| Lyrm9     | 431.368 | -0.8695 | 0.13867 | -6.2702 | 3.61E-10 | 8.60E-09 | 550.508 | 598.912 | 523.276 | 289.244 | 312.584 | 313.685 | Down |
| Nos2      | 253.625 | 1.38903 | 0.34976 | 3.97136 | 7.15E-05 | 0.00057  | 218.655 | 100.617 | 101.218 | 355.594 | 475.211 | 270.453 | Up   |
| Lgals9    | 6852.19 | 0.39457 | 0.09829 | 4.01431 | 5.96E-05 | 0.00048  | 5817.59 | 5677.68 | 6267.85 | 7562.84 | 7390.07 | 8397.11 | Up   |
| Ksr1      | 1021.41 | -0.4482 | 0.12936 | -3.4645 | 0.00053  | 0.00326  | 1126.17 | 1120.2  | 1290.05 | 775.463 | 897.622 | 918.936 | Down |
| Nf1       | 3599.89 | 0.37843 | 0.1431  | 2.64452 | 0.00818  | 0.03241  | 2913.15 | 3384.57 | 3093.82 | 3864.88 | 3546.13 | 4796.77 | Up   |
| Rab11fip4 | 881.283 | -1.164  | 0.2196  | -5.3007 | 1.15E-07 | 1.69E-06 | 1105.85 | 1355.94 | 1194.56 | 596.112 | 370.665 | 664.57  | Down |
| Rnf135    | 1009.84 | 0.38182 | 0.10654 | 3.58375 | 0.00034  | 0.00221  | 878.491 | 855.725 | 896.635 | 1089.59 | 1217.6  | 1121.02 | Up   |
| Rhbd13    | 363.669 | -0.7828 | 0.20853 | -3.7537 | 0.00017  | 0.00124  | 435.376 | 567.289 | 377.179 | 241.555 | 306.247 | 254.366 | Down |
| Psmd11    | 3799.62 | 0.26851 | 0.08615 | 3.11682 | 0.00183  | 0.00925  | 3636.84 | 3278.2  | 3426.12 | 4138.57 | 4179.75 | 4138.23 | Up   |
| Myo1d     | 9900.53 | 0.4941  | 0.10414 | 4.74465 | 2.09E-06 | 2.40E-05 | 9021.95 | 7517.54 | 8125.1  | 11472.3 | 12087.3 | 11179.1 | Up   |
| Tmem98    | 3003.55 | 0.79157 | 0.13736 | 5.76286 | 8.27E-09 | 1.52E-07 | 2568.72 | 2097.63 | 1932.68 | 4058.74 | 3565.14 | 3798.4  | Up   |
| Asic2     | 52.3233 | 2.50356 | 0.37756 | 6.63089 | 3.34E-11 | 9.53E-10 | 18.3825 | 17.2487 | 11.4586 | 91.231  | 77.0899 | 98.5293 | Up   |
| Ccl7      | 150.968 | 1.70874 | 0.30707 | 5.56471 | 2.63E-08 | 4.36E-07 | 70.6276 | 52.7042 | 88.8041 | 244.665 | 285.127 | 163.88  | Up   |
| Ccl12     | 181.915 | 1.87699 | 0.25153 | 7.4624  | 8.50E-14 | 3.66E-12 | 99.6527 | 75.7024 | 58.2479 | 317.235 | 288.295 | 252.356 | Up   |
| Ccl8      | 219.788 | 1.40405 | 0.44857 | 3.13008 | 0.00175  | 0.00889  | 74.4976 | 204.109 | 83.0748 | 324.492 | 171.076 | 461.479 | Up   |
| Fndc8     | 16.8208 | -2.58   | 0.66239 | -3.8949 | 9.82E-05 | 0.00075  | 29.9925 | 36.4138 | 20.0525 | 6.2203  | 4.2241  | 4.0216  | Down |
| Unc45b    | 975.36  | -0.585  | 0.16085 | -3.6369 | 0.00028  | 0.00184  | 1055.54 | 1348.27 | 1107.66 | 679.049 | 769.842 | 891.791 | Down |
| Slfn5os   | 85.0732 | -0.8598 | 0.34757 | -2.4738 | 0.01337  | 0.04844  | 84.1726 | 145.655 | 99.3078 | 43.5421 | 63.3615 | 74.3997 | Down |
| Slfn9     | 324.095 | 1.91012 | 0.29039 | 6.57775 | 4.78E-11 | 1.33E-09 | 199.305 | 88.1598 | 121.27  | 558.79  | 436.138 | 540.906 | Up   |
| Slfn8     | 337.17  | 0.94586 | 0.38113 | 2.48171 | 0.01308  | 0.04756  | 208.013 | 331.557 | 151.826 | 301.684 | 323.144 | 706.797 | Up   |
| Slfn10-ps | 13.1193 | 2.28169 | 1.01745 | 2.24257 | 0.02492  | 0.07948  | 3.87001 | 0       | 9.54883 | 36.2851 | 17.9524 | 11.0594 | Up   |
| Slfn2     | 171.112 | 0.79224 | 0.25562 | 3.09932 | 0.00194  | 0.00971  | 160.605 | 125.532 | 89.759  | 216.674 | 204.869 | 229.231 | Up   |
| Slfn1     | 449.25  | -0.686  | 0.20081 | -3.416  | 0.00064  | 0.0038   | 618.233 | 606.578 | 437.336 | 315.162 | 405.514 | 312.68  | Down |
| Gm11427   | 150.242 | 0.6784  | 0.25999 | 2.60933 | 0.00907  | 0.03523  | 121.905 | 96.7841 | 127.954 | 139.957 | 222.821 | 192.032 | Up   |
| Ap2b1     | 9076.13 | 0.43235 | 0.08043 | 5.37582 | 7.62E-08 | 1.16E-06 | 7740.01 | 7567.37 | 7871.1  | 10335   | 10921.4 | 10021.8 | Up   |
| 1700020L  | 255.225 | -1.0054 | 0.19976 | -5.0332 | 4.82E-07 | 6.36E-06 | 287.348 | 402.469 | 332.299 | 184.535 | 166.852 | 157.848 | Down |
| Mmp28     | 785.235 | -0.5069 | 0.15225 | -3.3292 | 0.00087  | 0.00495  | 769.164 | 941.968 | 1054.19 | 639.654 | 637.839 | 668.592 | Down |
| Ccl5      | 481.982 | -0.8281 | 0.16124 | -5.1357 | 2.81E-07 | 3.89E-06 | 648.226 | 656.407 | 545.238 | 302.721 | 384.393 | 354.907 | Down |
| Ccl9      | 1562.4  | 0.70929 | 0.22213 | 3.19309 | 0.00141  | 0.00743  | 920.094 | 1658.75 | 978.755 | 1939.7  | 2019.12 | 1857.98 | Up   |
| E230016K  | 1102.7  | 2.99426 | 0.55173 | 5.42701 | 5.73E-08 | 8.99E-07 | 440.213 | 166.737 | 130.819 | 1652.53 | 2331.7  | 1894.18 | Up   |
| Ccl3      | 225.811 | 1.62353 | 0.46983 | 3.45556 | 0.00055  | 0.00335  | 168.345 | 91.0346 | 72.5711 | 287.17  | 582.926 | 152.821 | Up   |
| Wfdc17    | 769.042 | 3.8153  | 0.35336 | 10      |          |          |         |         |         |         |         |         |      |

|          |         |         |         |         |          |          |         |         |         |         |         |         |      |
|----------|---------|---------|---------|---------|----------|----------|---------|---------|---------|---------|---------|---------|------|
| Acaca    | 3012.71 | 0.60665 | 0.25921 | 2.34043 | 0.01926  | 0.06483  | 1668.94 | 3562.81 | 1933.64 | 3233.52 | 3630.62 | 4046.74 | Up   |
| Myo19    | 816.228 | 0.31265 | 0.14319 | 2.18345 | 0.029    | 0.08963  | 722.724 | 792.48  | 669.373 | 898.833 | 801.523 | 1012.44 | Up   |
| Znhit3   | 533.589 | -0.3413 | 0.13802 | -2.4726 | 0.01341  | 0.0486   | 633.713 | 543.333 | 612.08  | 499.697 | 478.379 | 434.333 | Down |
| Car4     | 19271.1 | 0.95876 | 0.16891 | 5.6763  | 1.38E-08 | 2.43E-07 | 12426.6 | 12007   | 14846.5 | 24204.2 | 31279.5 | 20863.1 | Up   |
| Usp32    | 3279.71 | 0.40632 | 0.09238 | 4.39856 | 1.09E-05 | 0.00011  | 2709.97 | 2861.36 | 2891.39 | 3513.43 | 3179.13 | 3911.01 | Up   |
| Tbx2     | 12506.6 | -0.597  | 0.12306 | -4.8515 | 1.23E-06 | 1.48E-05 | 14760.2 | 14304.9 | 16108.9 | 10189.9 | 11048.1 | 8627.34 | Down |
| Tbx4     | 4115.27 | -0.5375 | 0.12271 | -4.3804 | 1.18E-05 | 0.00011  | 5263.21 | 4347.62 | 5008.36 | 3405.61 | 3628.5  | 3038.32 | Down |
| Brip1    | 112.632 | 0.93138 | 0.29816 | 3.1238  | 0.00179  | 0.00907  | 82.2376 | 98.7006 | 51.5637 | 136.846 | 142.563 | 163.88  | Up   |
| Brip1os  | 2585.58 | 0.41101 | 0.10682 | 3.84778 | 0.00012  | 0.00089  | 2149.79 | 2352.52 | 2157.08 | 2755.59 | 2888.23 | 3210.24 | Up   |
| Vmp1     | 12293.6 | 0.64673 | 0.07986 | 8.09798 | 5.59E-16 | 3.27E-14 | 9278.34 | 9388.06 | 10083.6 | 15094.6 | 15212   | 14705   | Up   |
| Cltc     | 19043.6 | 0.35397 | 0.10234 | 3.45872 | 0.00054  | 0.00332  | 15520.7 | 17087.7 | 17548.8 | 19835.5 | 21268.4 | 23000.6 | Up   |
| Gdpd1    | 4209.09 | 0.63583 | 0.12814 | 4.96209 | 6.97E-07 | 8.94E-06 | 3316.6  | 3495.73 | 3076.63 | 5817.01 | 4494.44 | 5054.15 | Up   |
| Smg8     | 1288.71 | 0.42592 | 0.12554 | 3.39257 | 0.00069  | 0.0041   | 1232.6  | 1000.42 | 1066.6  | 1571.66 | 1418.24 | 1442.75 | Up   |
| Prr11    | 110.934 | 0.68971 | 0.30948 | 2.22863 | 0.02584  | 0.08174  | 117.068 | 68.9946 | 68.7516 | 137.883 | 114.051 | 158.853 | Up   |
| Ppm1e    | 460.168 | -0.5285 | 0.1605  | -3.2928 | 0.00099  | 0.00554  | 465.368 | 599.87  | 565.291 | 345.226 | 399.178 | 386.074 | Down |
| Septin4  | 9387.58 | -0.6816 | 0.11775 | -5.7887 | 7.09E-09 | 1.33E-07 | 10115.2 | 12066.4 | 12512.8 | 7101.5  | 7686.81 | 6842.76 | Down |
| Mtmr4    | 2947.56 | 0.28899 | 0.12852 | 2.24848 | 0.02455  | 0.07851  | 2478.74 | 2548.97 | 2932.45 | 3217.97 | 2899.85 | 3607.38 | Up   |
| Rnf43    | 1091.35 | 0.62702 | 0.17517 | 3.57956 | 0.00034  | 0.00224  | 1074.89 | 705.278 | 793.508 | 1324.92 | 1264.06 | 1385.44 | Up   |
| Tspoap1  | 826.66  | -0.8596 | 0.25889 | -3.3202 | 0.0009   | 0.0051   | 811.734 | 1319.52 | 1066.6  | 555.68  | 418.186 | 788.234 | Down |
| Epx      | 6.63286 | -2.4439 | 0.99785 | -2.4492 | 0.01432  | 0.05115  | 12.5775 | 13.4156 | 7.63906 | 1.03672 | 2.11205 | 3.0162  | Down |
| Vezf1    | 5219.17 | -0.2608 | 0.08231 | -3.1687 | 0.00153  | 0.00797  | 5900.79 | 5400.75 | 5767.49 | 4706.69 | 4803.86 | 4735.44 | Down |
| Cuedc1   | 2316.4  | -0.4433 | 0.08417 | -5.2668 | 1.39E-07 | 2.01E-06 | 2659.66 | 2601.67 | 2747.2  | 1998.79 | 1953.65 | 1937.41 | Down |
| C030037C | 187.206 | -0.8739 | 0.24595 | -3.553  | 0.00038  | 0.00245  | 221.558 | 227.107 | 277.871 | 155.507 | 144.675 | 96.5185 | Down |
| Akap1    | 2385.57 | 0.22542 | 0.10895 | 2.06898 | 0.03855  | 0.11133  | 2203.97 | 2210.7  | 2183.82 | 2664.36 | 2757.28 | 2293.32 | Up   |
| Scpep1   | 713.378 | 0.60359 | 0.23695 | 2.54731 | 0.01086  | 0.04093  | 776.904 | 412.051 | 509.907 | 881.208 | 945.143 | 755.056 | Up   |
| Gm11496  | 23.826  | 1.4992  | 0.64884 | 2.31057 | 0.02086  | 0.06888  | 4.83751 | 16.2904 | 16.233  | 37.3218 | 19.0085 | 49.2646 | Up   |
| Ankfn1   | 228.956 | -0.7157 | 0.26498 | -2.7009 | 0.00691  | 0.02825  | 236.07  | 303.768 | 314.156 | 170.021 | 122.499 | 227.221 | Down |
| Pctp     | 958.075 | 0.42926 | 0.11941 | 3.59477 | 0.00032  | 0.00213  | 743.041 | 889.264 | 817.38  | 1060.56 | 1136.28 | 1101.92 | Up   |
| Tmem100  | 27953.8 | -0.6611 | 0.13606 | -4.8589 | 1.18E-06 | 1.43E-05 | 29462.4 | 33079.1 | 40204.4 | 22324.6 | 22380.3 | 20271.9 | Down |
| Mmd      | 3470.39 | -0.4277 | 0.12874 | -3.3221 | 0.00089  | 0.00507  | 3845.82 | 4545.02 | 3552.16 | 3092.52 | 3056.14 | 2730.67 | Down |
| Tom1l1   | 3164.61 | 0.32274 | 0.11774 | 2.74109 | 0.00612  | 0.02559  | 3063.11 | 2793.32 | 2580.09 | 3283.38 | 3414.13 | 3853.7  | Up   |
| B230206L | 163.646 | -0.8064 | 0.23651 | -3.4097 | 0.00065  | 0.00388  | 191.565 | 197.401 | 235.856 | 123.369 | 92.9302 | 140.756 | Down |
| Luc7l3   | 7787.41 | -0.3383 | 0.11707 | -2.8892 | 0.00386  | 0.01745  | 8343.73 | 7895.09 | 9849.62 | 6508.5  | 7101.77 | 7025.74 | Down |
| Cacna1g  | 33.9026 | -1.2347 | 0.53116 | -2.3246 | 0.02009  | 0.06705  | 23.22   | 60.3703 | 59.2027 | 19.6976 | 14.7844 | 26.1404 | Down |
| Epn3     | 5386.67 | 0.41294 | 0.14768 | 2.79614 | 0.00517  | 0.02232  | 3931.93 | 4617.85 | 5312.97 | 6677.49 | 6386.84 | 5392.97 | Up   |
| Mycbpap  | 2382.84 | -0.5388 | 0.23166 | -2.3257 | 0.02004  | 0.06692  | 2421.66 | 3324.2  | 2722.37 | 1996.71 | 1311.58 | 2520.54 | Down |
| Lrrc59   | 6804.79 | 0.61972 | 0.08213 | 7.5457  | 4.50E-14 | 2.01E-12 | 5183.87 | 5298.21 | 5613.76 | 8373.55 | 8377.45 | 7981.88 | Up   |
| Eme1     | 26.4632 | 1.20971 | 0.54549 | 2.21768 | 0.02658  | 0.08363  | 11.61   | 13.4156 | 22.9172 | 39.3952 | 22.7165 | 49.2646 | Up   |
| Gm11545  | 8.82936 | 2.17688 | 0.86115 | 2.52787 | 0.01148  | 0.04284  | 1.935   | 3.83303 | 3.81953 | 8.29373 | 19.0085 | 16.0864 | Up   |
| Sgca     | 148.169 | -4.4553 | 0.95394 | -4.6704 | 3.01E-06 | 3.35E-05 | 179.955 | 550.999 | 119.36  | 11.4039 | 3.16808 | 24.1296 | Down |
| Pdk2     | 2374.66 | -0.6159 | 0.16616 | -3.7065 | 0.00021  | 0.00145  | 2728.35 | 3481.35 | 2412.03 | 2028.85 | 1951.53 | 1645.84 | Down |
| Itga3    | 15310.5 | 0.56356 | 0.0899  | 6.26886 | 3.64E-10 | 8.66E-09 | 11852.9 | 12025.2 | 13194.6 | 17395.1 | 18713.8 | 18681.4 | Up   |
| Fam117a  | 415.635 | 0.45323 | 0.20653 | 2.19454 | 0.0282   | 0.0877   | 400.546 | 257.772 | 394.367 | 512.138 | 440.363 | 488.625 | Up   |
| Slc35b1  | 4225.75 | 0.27438 | 0.08965 | 3.06049 | 0.00221  | 0.01083  | 3709.4  | 3734.33 | 4031.52 | 4829.02 | 4606.38 | 4443.87 | Up   |
| Spop     | 16943.4 | -0.3698 | 0.07664 | -4.8251 | 1.40E-06 | 1.67E-05 | 18673.7 | 19047.3 | 19587.5 | 14961.9 | 15181.4 | 14208.3 | Down |
| Nxph3    | 366.083 | -1.1781 | 0.24322 | -4.8436 | 1.27E-06 | 1.53E-05 | 377.326 | 607.536 | 538.554 | 241.555 | 172.132 | 259.393 | Down |
| Abi3     | 353.523 | -0.4482 | 0.1809  | -2.4774 | 0.01324  | 0.04804  | 393.773 | 355.514 | 474.577 | 280.95  | 335.816 | 280.507 | Down |
| Atp5g1   | 3293.3  | -0.6888 | 0.23092 | -2.9831 | 0.00285  | 0.01348  | 3195.66 | 5742.84 | 3256.15 | 2692.35 | 2697.09 | 2175.69 | Down |
| Calco2   | 78.3152 | -1.1031 | 0.46672 | -2.3634 | 0.01811  | 0.06171  | 118.035 | 84.3268 | 118.405 | 40.4319 | 23.2326 | 85.4591 | Down |
| Ttll6    | 1594.19 | -0.6825 | 0.22281 | -3.0632 | 0.00219  | 0.01075  | 1863.41 | 2015.22 | 2014.8  | 1369.5  | 793.075 | 1509.11 | Down |
| Hoxb4    | 571.613 | -0.8004 | 0.15813 | -5.0618 | 4.15E-07 | 5.56E-06 | 739.171 | 639.159 | 800.192 | 397.062 | 472.043 | 382.052 | Down |
| Skap1    | 388.293 | -0.6716 | 0.14985 | -4.4821 | 7.39E-06 | 7.53E-05 | 454.726 | 464.755 | 511.817 | 270.583 | 304.135 | 323.739 | Down |
| Nfe2l1   | 13328.5 | 0.24355 | 0.07629 | 3.19242 | 0.00141  | 0.00745  | 12090.9 | 12298.3 | 12229.2 | 14212.3 | 15101.2 | 14039.4 | Up   |
| Copz2    | 1447.14 | -0.4046 | 0.10006 | -4.0433 | 5.27E-05 | 0.00043  | 1572.19 | 1717.2  | 1656.72 | 1308.34 | 1223.93 | 1204.47 | Down |
| Cdk5rap3 | 2268.23 | 0.33294 | 0.10237 | 3.25246 | 0.00114  | 0.00626  | 1946.61 | 2125.42 | 1950.83 | 2700.64 | 2509.12 | 2376.77 | Up   |
| D030028A | 26.8544 | 1.49224 | 0.46072 | 3.23889 | 0.0012   | 0.0065   | 14.5125 | 11.4991 | 16.233  | 34.2116 | 46.4651 | 38.2052 | Up   |
| Sp2      | 206.496 | 0.75613 | 0.1915  | 3.94837 | 7.87E-05 | 0.00062  | 134.483 | 164.82  | 161.375 | 278.877 | 267.174 | 232.248 | Up   |
| Lrrc46   | 792.906 | -0.8242 | 0.22634 | -3.6414 | 0.00027  | 0.00181  | 863.011 | 1157.58 | 1019.81 | 721.554 | 401.29  | 594.192 | Down |
| Osbpl7   | 1699.76 | 0.82087 | 0.11931 | 6.87999 | 5.99E-12 | 1.92E-10 | 1180.35 | 1178.66 | 1327.29 | 2281.81 | 2279.96 | 1950.48 | Up   |
| Tbx21    | 101.9   | -0.7204 | 0.31935 | -2.2558 | 0.02408  | 0.07733  | 135.45  | 139.906 | 105.037 | 55.9827 | 106.659 | 68.3673 | Down |
| Gm11592  | 63.4503 | -0.9905 | 0.37885 | -2.6146 | 0.00893  | 0.03477  | 71.5951 | 88.1598 | 93.5785 | 50.7991 | 24.2886 | 52.2808 | Down |
| Arhgap23 | 2685.53 | -0.2919 | 0.12989 | -2.2471 | 0.02463  | 0.07873  | 3087.3  | 2583.47 | 3197.9  | 2280.77 | 2665.41 | 2298.35 | Down |
| C410003L | 51.5994 | 1.32457 | 0.35849 | 3.69486 | 0.00022  | 0.00151  | 32.895  | 30.6643 | 24.827  | 63.2397 | 65.4736 | 92.4969 | Up   |
| Cisd3    | 741.429 | -0.3249 | 0.12211 | -2.6606 | 0.0078   | 0.03113  | 756.586 | 885.431 | 831.703 | 671.792 | 630.447 | 672.613 | Down |
| Lasp1    | 14564   | 0.34466 | 0.12443 | 2.76994 | 0.00561  | 0.02385  | 11070.2 | 13027.5 | 14399.6 | 16301.3 | 17177.3 | 15407.8 | Up   |
| B230217C | 96.6305 | -0.7913 | 0.28509 | -2.7755 | 0.00551  | 0.02352  | 97.7176 | 141.822 | 127.954 | 80.8638 | 57.0254 | 74.3997 | Down |
| Stac2    | 145.943 | 0.60278 | 0.19889 | 3.03068 | 0.00244  | 0.0118   | 119.97  | 114.033 | 113.631 | 185.572 | 180.58  | 161.87  | Up   |
| Ppp1r1b  | 130.453 | -1.6711 | 0.35052 | -4.7675 | 1.87E-06 | 2.16E-05 | 203.175 | 275.02  | 117.451 | 71.5334 | 61.2495 | 54.2916 | Down |
| Stard3   | 4184.58 | 0.49835 | 0.122   | 4.0849  | 4.41E-05 | 0.00037  | 3701.66 | 3197.71 | 3507.28 | 5310.06 | 5081.59 | 4309.15 | Up   |
| Tcap     | 2352.69 | -4.2936 | 0.58876 | -7.2925 | 3.04E-13 | 1.19E-11 | 5109.38 | 6277.55 | 2044.4  | 200.086 | 127.779 | 356.917 | Down |
| Pnmt     | 44.9368 | -2.3313 | 0.52362 | -4.4522 | 8.50E-06 | 8.52E-05 | 80.3026 | 94.8676 | 49.6539 | 16.5875 | 22.1765 | 6.03241 | Down |
| Thra     | 3222.22 | -0.4374 | 0.11046 | -3.9601 | 7.49E-05 | 0.00059  | 3367.87 | 3857.95 | 3894.97 | 2720.34 | 2929.41 | 2562.77 | Down |
| Msl1     | 485.169 | 0.33033 | 0.12618 | 2.61789 | 0.00885  | 0.03451  | 438.278 | 430.258 | 421.103 | 572.267 | 513.228 | 535.879 | Up   |
| Top2a    | 610.367 | 1.19072 | 0.21552 | 5.52475 | 3.30E-08 | 5.41E-07 | 352.171 | 441.757 | 321.796 | 869.805 | 643.119 | 1033.55 | Up   |
| Igfbp4   | 9296.91 | -0.8815 | 0.13172 | -6.6924 | 2.20E-11 | 6.52E-10 | 10695.7 | 14146.8 | 11313.5 | 6237.92 | 6579.04 | 6808.57 | Down |
| Tns4     | 99.077  | 1.29869 | 0.33184 | 3.91358 | 9.09E-05 | 0.0007   | 50.3101 | 76.6607 | 44.8795 | 118.186 | 121.443 | 182.983 | Up   |
| Krt222   | 96.8116 | -1.3743 | 0.50563 | -2.718  | 0.0      |          |         |         |         |         |         |         |      |

|          |         |         |         |         |          |          |         |         |         |         |         |         |      |
|----------|---------|---------|---------|---------|----------|----------|---------|---------|---------|---------|---------|---------|------|
| Gm10039  | 321.438 | -0.6075 | 0.26222 | -2.3168 | 0.02052  | 0.06809  | 322.178 | 538.541 | 303.653 | 298.574 | 234.438 | 231.242 | Down |
| Jup      | 18802.8 | -0.2648 | 0.13109 | -2.0197 | 0.04342  | 0.12222  | 19454.5 | 19225.5 | 22889.5 | 17517.4 | 18886   | 14843.7 | Down |
| P3h4     | 1317.58 | -0.4551 | 0.18203 | -2.4999 | 0.01242  | 0.04565  | 1825.68 | 1329.1  | 1416.09 | 1262.72 | 1169.02 | 902.85  | Down |
| Acly     | 15376.4 | 1.04451 | 0.13166 | 7.93363 | 2.13E-15 | 1.13E-13 | 11144.6 | 10200.7 | 8778.24 | 18506.4 | 22692.9 | 20935.5 | Up   |
| Ttc25    | 1233.09 | -0.6143 | 0.19667 | -3.1234 | 0.00179  | 0.00908  | 1379.66 | 1602.21 | 1493.44 | 1143.5  | 695.921 | 1083.82 | Down |
| Cnp      | 3709.09 | 0.29612 | 0.09314 | 3.17929 | 0.00148  | 0.00774  | 3226.62 | 3548.43 | 3214.14 | 4233.95 | 4116.39 | 3915.03 | Up   |
| Nkiras2  | 2248.87 | 0.46027 | 0.14543 | 3.16499 | 0.00155  | 0.00805  | 2037.56 | 1832.19 | 1809.5  | 2727.6  | 2936.81 | 2149.55 | Up   |
| Dhx58    | 320.249 | 0.90082 | 0.20009 | 4.502   | 6.73E-06 | 6.91E-05 | 218.655 | 261.605 | 190.022 | 386.695 | 374.889 | 489.63  | Up   |
| Rab5c    | 13429.1 | 0.22542 | 0.09931 | 2.26971 | 0.02323  | 0.07518  | 12819.4 | 12207.3 | 12119.4 | 15021   | 15328.2 | 13079.3 | Up   |
| Kcnh4    | 60.5847 | 1.57303 | 0.50499 | 3.115   | 0.00184  | 0.00929  | 51.2776 | 17.2487 | 22.9172 | 103.672 | 115.107 | 53.2862 | Up   |
| Ghdc     | 953.043 | 0.27206 | 0.11714 | 2.32256 | 0.0202   | 0.06728  | 922.029 | 820.269 | 847.936 | 1071.96 | 1090.87 | 965.185 | Up   |
| Stat5a   | 1091.32 | 0.50545 | 0.12699 | 3.98036 | 6.88E-05 | 0.00055  | 907.516 | 964.966 | 833.613 | 1292.78 | 1391.84 | 1157.22 | Up   |
| Stat3    | 13730.7 | 0.44923 | 0.08531 | 5.26605 | 1.39E-07 | 2.01E-06 | 11280.1 | 11626.6 | 11923.6 | 14940.1 | 15955.5 | 16658.5 | Up   |
| Cavin1   | 22577   | -0.4663 | 0.14824 | -3.1455 | 0.00166  | 0.00852  | 24665.5 | 23988.1 | 29928.9 | 19435.3 | 21477.4 | 15966.8 | Down |
| Atp6v0a1 | 9799.31 | 1.02669 | 0.15951 | 6.43633 | 1.22E-10 | 3.20E-09 | 7444.92 | 5827.17 | 6085.47 | 12525.6 | 15648.2 | 11264.5 | Up   |
| Naglu    | 1865.31 | 0.87475 | 0.1036  | 8.44373 | 3.07E-17 | 2.12E-15 | 1315.8  | 1368.39 | 1265.22 | 2443.54 | 2560.86 | 2238.02 | Up   |
| Mlx      | 2101.5  | 0.20361 | 0.09984 | 2.03927 | 0.04142  | 0.11777  | 1881.79 | 1977.85 | 2000.48 | 2327.43 | 2342.26 | 2079.17 | Up   |
| Psmc3ip  | 368.933 | -0.5423 | 0.19958 | -2.7173 | 0.00658  | 0.0271   | 431.506 | 458.048 | 423.013 | 348.337 | 224.933 | 327.761 | Down |
| Ramp2    | 15762.8 | -0.9444 | 0.14945 | -6.3192 | 2.63E-10 | 6.49E-09 | 17756.6 | 19934.7 | 24544.3 | 11052.4 | 11713.4 | 9575.44 | Down |
| Wnk4     | 1214    | 0.81179 | 0.15384 | 5.27693 | 1.31E-07 | 1.91E-06 | 904.614 | 793.438 | 945.334 | 1677.41 | 1683.3  | 1279.88 | Up   |
| Coa3     | 3115.08 | 0.2439  | 0.11355 | 2.14791 | 0.03172  | 0.09565  | 2713.84 | 3031.93 | 2811.18 | 3593.26 | 3526.07 | 3014.19 | Up   |
| Aoc3     | 455.485 | -3.1784 | 0.40803 | -7.7897 | 6.72E-15 | 3.34E-13 | 503.101 | 1475.72 | 482.216 | 72.5701 | 109.827 | 89.4807 | Down |
| Ifi35    | 2965.34 | -0.2712 | 0.12401 | -2.1873 | 0.02872  | 0.08894  | 2876.38 | 3622.22 | 3231.32 | 2801.21 | 2488    | 2772.9  | Down |
| Rnd2     | 571.841 | -0.4037 | 0.14309 | -2.8213 | 0.00478  | 0.0209   | 659.836 | 683.238 | 611.125 | 513.174 | 429.802 | 533.868 | Down |
| Brca1    | 122.275 | 0.9544  | 0.26279 | 3.63175 | 0.00028  | 0.00188  | 94.8151 | 88.1598 | 66.8418 | 162.764 | 133.059 | 188.01  | Up   |
| Nbr1     | 8261.47 | 0.20354 | 0.08815 | 2.30907 | 0.02094  | 0.06912  | 8143.46 | 7695.78 | 7199.82 | 8634.81 | 8888.57 | 9006.38 | Up   |
| Tmem106  | 2314.66 | 0.97873 | 0.14981 | 6.5332  | 6.44E-11 | 1.76E-09 | 1746.34 | 1604.12 | 1324.42 | 3003.37 | 3467.99 | 2741.73 | Up   |
| Rdm1     | 1307.18 | -0.4838 | 0.18142 | -2.6667 | 0.00766  | 0.03068  | 1712.48 | 1215.07 | 1645.26 | 1126.91 | 1234.49 | 908.882 | Down |
| Arl4d    | 3647.12 | -1.2582 | 0.20999 | -5.9915 | 2.08E-09 | 4.30E-08 | 4591.76 | 5254.13 | 5585.11 | 2745.22 | 2214.49 | 1492.01 | Down |
| Sost     | 14.429  | -4.3207 | 1.11536 | -3.8738 | 0.00011  | 0.00081  | 10.6425 | 54.6207 | 17.1879 | 0       | 2.11205 | 2.0108  | Down |
| Mpp3     | 367.052 | -1.3695 | 0.2218  | -6.1744 | 6.64E-10 | 1.50E-08 | 545.671 | 420.676 | 621.629 | 185.572 | 277.412 | 251.35  | Down |
| Lsm12    | 1836.73 | 0.33056 | 0.09305 | 3.55252 | 0.00038  | 0.00245  | 1536.39 | 1698.99 | 1646.22 | 2069.28 | 2047.63 | 2021.86 | Up   |
| G6pc3    | 2634.54 | 0.28243 | 0.12943 | 2.18212 | 0.0291   | 0.08985  | 2153.66 | 2687.92 | 2290.76 | 3146.43 | 2868.16 | 2660.29 | Up   |
| Asb16    | 6.79122 | -2.218  | 1.07172 | -2.0695 | 0.03849  | 0.11123  | 3.87001 | 21.0817 | 8.59395 | 2.07343 | 2.11205 | 3.0162  | Down |
| Tmub2    | 3011.25 | 0.22897 | 0.081   | 2.82673 | 0.0047   | 0.0206   | 2795.11 | 2754.99 | 2768.21 | 3357.92 | 3228.27 | 3162.99 | Up   |
| Rundc3a  | 318.226 | 1.78611 | 0.17906 | 9.97512 | 1.96E-23 | 2.27E-21 | 131.58  | 153.321 | 144.187 | 485.183 | 560.749 | 434.333 | Up   |
| Slc25a39 | 5581.69 | 0.28477 | 0.11581 | 2.45907 | 0.01393  | 0.05007  | 5486.7  | 5180.35 | 4430.66 | 6198.52 | 6404.79 | 5789.1  | Up   |
| Gri      | 13909.1 | 0.64561 | 0.12521 | 5.1561  | 2.52E-07 | 3.52E-06 | 11659.4 | 10499.6 | 10384.4 | 17370.2 | 18896.5 | 14644.7 | Up   |
| Itga2b   | 713.077 | -1.2543 | 0.26208 | -4.7859 | 1.70E-06 | 2.00E-05 | 602.753 | 1321.44 | 1090.48 | 414.686 | 430.858 | 418.247 | Down |
| 2810433D | 94.4622 | -0.9457 | 0.35201 | -2.6865 | 0.00722  | 0.02925  | 169.313 | 87.2015 | 116.496 | 58.0561 | 83.426  | 52.2808 | Down |
| Adam11   | 123.886 | -1.6505 | 0.38295 | -4.3101 | 1.63E-05 | 0.00015  | 171.248 | 286.519 | 105.992 | 67.3865 | 53.8573 | 58.3133 | Down |
| Gjc1     | 1685.15 | -0.6595 | 0.12891 | -5.1159 | 3.12E-07 | 4.28E-06 | 1816    | 2193.45 | 2181.91 | 1269.98 | 1222.88 | 1426.66 | Down |
| Higd1b   | 885.306 | -0.2958 | 0.13398 | -2.208  | 0.02725  | 0.08526  | 878.491 | 938.135 | 1110.53 | 792.051 | 819.476 | 773.153 | Down |
| Eftud2   | 5634.7  | -0.2294 | 0.08922 | -2.5714 | 0.01013  | 0.03863  | 5921.11 | 5806.09 | 6518.03 | 5188.76 | 5273.79 | 5100.4  | Down |
| Ccdc103  | 453.298 | -0.4951 | 0.23458 | -2.1108 | 0.03479  | 0.10277  | 452.791 | 587.413 | 550.967 | 403.282 | 260.838 | 464.495 | Down |
| Nmt1     | 6223.29 | 0.48549 | 0.11219 | 4.32746 | 1.51E-05 | 0.00014  | 5704.39 | 4844    | 5009.32 | 7378.31 | 7725.88 | 6677.87 | Up   |
| Acdb4    | 1922.87 | -0.3391 | 0.10609 | -3.1968 | 0.00139  | 0.00736  | 1947.58 | 2257.66 | 2238.25 | 1651.49 | 1736.11 | 1706.17 | Down |
| Fmnl1    | 2053.47 | 0.54531 | 0.18447 | 2.95616 | 0.00311  | 0.01455  | 2024.98 | 1566.75 | 1418    | 2314.99 | 2920.97 | 2075.15 | Up   |
| Plekham1 | 3466.58 | 0.40614 | 0.1368  | 2.96888 | 0.00299  | 0.01403  | 3202.43 | 2522.14 | 3220.82 | 381.26  | 4333.93 | 3700.88 | Up   |
| Gm884    | 8.28094 | 3.58039 | 1.3851  | 2.58493 | 0.00974  | 0.03738  | 0       | 3.83303 | 0       | 13.4773 | 4.2241  | 28.1512 | Up   |
| Rprml    | 129.898 | -0.6895 | 0.28765 | -2.3971 | 0.01653  | 0.05738  | 156.735 | 148.53  | 175.698 | 75.6803 | 137.283 | 85.4591 | Down |
| Nsf      | 3561.62 | 0.71235 | 0.12957 | 5.49789 | 3.84E-08 | 6.21E-07 | 2979.9  | 2481.89 | 2637.39 | 4184.19 | 5003.45 | 4082.93 | Up   |
| Arf2     | 3601.14 | 0.36753 | 0.11334 | 3.24271 | 0.00118  | 0.00642  | 3435.6  | 2843.15 | 3155.89 | 4016.24 | 4323.37 | 3832.59 | Up   |
| Mapt     | 7644.88 | -0.9141 | 0.16184 | -5.6483 | 1.62E-08 | 2.81E-07 | 8495.63 | 10119.2 | 11351.6 | 4777.19 | 6329.82 | 4795.76 | Down |
| Cdc27    | 2706.29 | 0.26379 | 0.1167  | 2.26044 | 0.02379  | 0.07658  | 2330.71 | 2622.75 | 2425.4  | 2733.82 | 2834.37 | 3290.68 | Up   |
| Myl4     | 9952.4  | -5.1479 | 0.85941 | -5.99   | 2.10E-09 | 4.33E-08 | 10983.1 | 35624.2 | 11469.1 | 455.118 | 199.589 | 983.282 | Down |
| Gm11639  | 18.4617 | 2.63268 | 0.75386 | 3.49227 | 0.00048  | 0.00299  | 7.74001 | 6.70781 | 0.95488 | 24.8812 | 23.2326 | 47.2538 | Up   |
| Mrc2     | 4269.52 | -0.4316 | 0.191   | -2.2599 | 0.02383  | 0.07666  | 3587.5  | 5507.11 | 5615.67 | 3563.19 | 4136.45 | 3207.23 | Down |
| Tanc2    | 3001.89 | 0.44933 | 0.12593 | 3.5682  | 0.00036  | 0.00233  | 2183.65 | 2828.78 | 2602.06 | 3381.77 | 3384.56 | 3630.5  | Up   |
| Cyb561   | 9345.42 | 0.39496 | 0.08037 | 4.9144  | 8.91E-07 | 1.11E-05 | 8169.58 | 7934.38 | 8118.41 | 11174.8 | 10283.6 | 10391.8 | Up   |
| Ace      | 23661.9 | -0.3465 | 0.10771 | -3.2166 | 0.0013   | 0.00695  | 27103.6 | 26222.7 | 26141.8 | 22643.9 | 21480.6 | 18378.7 | Down |
| Ace3     | 248.908 | -0.6315 | 0.24891 | -2.5368 | 0.01119  | 0.04189  | 327.983 | 256.813 | 322.75  | 261.252 | 165.796 | 158.853 | Down |
| Dcaf7    | 5692.97 | 0.21816 | 0.08633 | 2.52715 | 0.0115   | 0.04291  | 5385.11 | 4985.82 | 5418.96 | 6164.31 | 6313.98 | 5889.64 | Up   |
| Limd2    | 6468.28 | 0.6294  | 0.12639 | 4.97977 | 6.37E-07 | 8.24E-06 | 5454.77 | 4925.45 | 4857.49 | 8118.52 | 8692.14 | 6761.32 | Up   |
| Ccdc47   | 2463.67 | 0.57475 | 0.12756 | 4.5056  | 6.62E-06 | 6.81E-05 | 2139.15 | 1747.86 | 2051.09 | 2746.26 | 2850.21 | 3247.44 | Up   |
| Scn4a    | 106.416 | -1.2797 | 0.34376 | -3.7225 | 0.0002   | 0.00138  | 126.743 | 214.65  | 110.766 | 57.0194 | 76.0338 | 53.2862 | Down |
| Icam2    | 8758.23 | -0.6154 | 0.15735 | -3.911  | 9.19E-05 | 0.0007   | 8716.22 | 10300.3 | 12778.2 | 7053.81 | 7406.96 | 6293.81 | Down |
| Ern1     | 2569.08 | 0.37592 | 0.11124 | 3.37925 | 0.00073  | 0.00426  | 2441.01 | 2007.55 | 2260.21 | 2797.06 | 2997    | 2911.64 | Up   |
| Tex2     | 2431.05 | 0.25191 | 0.08829 | 2.85318 | 0.00433  | 0.0192   | 2303.62 | 2181.95 | 2172.36 | 2672.65 | 2716.1  | 2539.64 | Up   |
| Pecan1   | 34154.4 | -0.314  | 0.11453 | -2.7416 | 0.00611  | 0.02556  | 34978.1 | 36493.4 | 42097.9 | 29063.3 | 33157.1 | 29136.5 | Down |
| Milr1    | 316.116 | 1.53663 | 0.2283  | 6.73087 | 1.69E-11 | 5.11E-10 | 178.988 | 187.819 | 119.36  | 471.706 | 540.685 | 398.139 | Up   |
| Smurf2   | 7798.57 | -0.2366 | 0.10847 | -2.1809 | 0.02919  | 0.09003  | 7957.7  | 8022.54 | 9329.21 | 6683.71 | 7356.27 | 7441.98 | Down |
| Kpna2    | 2817.62 | 0.24564 | 0.12246 | 2.00589 | 0.04487  | 0.12537  | 2653.86 | 2234.66 | 2846.51 | 3152.65 | 2930.47 | 3087.59 | Up   |
| 1810010H | 4458.04 | -0.7601 | 0.21413 | -3.5499 | 0.00039  | 0.00247  | 4498.88 | 5549.28 | 6770.12 | 3943.67 | 2394.01 | 3592.3  | Down |
| Pitpnc1  | 6981.01 | -0.2854 | 0.13526 | -2.1102 | 0.03484  | 0.10285  | 8342.77 | 6812.26 | 7852.96 | 5651.14 | 7191.53 | 6035.42 | Down |
| Helz     | 1955.02 | 0.26431 | 0.10561 | 2.5028  | 0.01232  | 0.04535  | 1766.66 | 1640.54 | 1922.18 | 2109.72 | 2076.15 | 2214.9  | Up   |
| Cep112   | 288.367 | -0.8687 | 0.20891 | -4.1582 | 3.21E-05 | 0.00028  | 339.593 | 368.93  | 409.645 |         |         |         |      |

|            |         |         |         |         |          |          |         |         |         |         |         |         |      |
|------------|---------|---------|---------|---------|----------|----------|---------|---------|---------|---------|---------|---------|------|
| Fam20a     | 650.654 | -0.4251 | 0.1877  | -2.2648 | 0.02353  | 0.07591  | 597.916 | 764.69  | 874.673 | 561.9   | 625.167 | 479.576 | Down |
| Abca8b     | 1344.34 | -0.4973 | 0.11545 | -4.3074 | 1.65E-05 | 0.00015  | 1473.5  | 1614.67 | 1632.85 | 1125.87 | 1199.64 | 1019.48 | Down |
| Abca8a     | 4344.8  | -0.7688 | 0.14318 | -5.3695 | 7.90E-08 | 1.20E-06 | 6157.18 | 5234.01 | 5036.05 | 3603.62 | 3303.25 | 2734.69 | Down |
| Abca6      | 115.445 | -0.7518 | 0.30204 | -2.4892 | 0.0128   | 0.04679  | 118.035 | 170.57  | 146.097 | 68.4232 | 73.9218 | 115.621 | Down |
| Kcnj16     | 5.45505 | 2.9084  | 1.39971 | 2.07785 | 0.03772  | 0.10953  | 1.935   | 1.91652 | 0       | 20.7343 | 2.11205 | 6.03241 | Up   |
| Kcnj2      | 1545.26 | 0.35452 | 0.1499  | 2.36509 | 0.01803  | 0.06156  | 1427.06 | 1250.53 | 1391.26 | 1607.95 | 2064.53 | 1530.22 | Up   |
| Slc39a11   | 1665.2  | 1.00544 | 0.1548  | 6.49503 | 8.30E-11 | 2.22E-09 | 1220.02 | 1213.16 | 888.996 | 2279.74 | 2049.75 | 2339.57 | Up   |
| Cdc42ep4   | 7486.98 | -0.3946 | 0.09682 | -4.076  | 4.58E-05 | 0.00038  | 8793.62 | 7922.88 | 8797.34 | 6873.43 | 6402.68 | 6131.94 | Down |
| Sdk2       | 123.622 | -0.8092 | 0.31776 | -2.5466 | 0.01088  | 0.04098  | 121.905 | 201.234 | 148.962 | 82.9373 | 119.331 | 67.3619 | Down |
| 4932435C   | 2.40222 | -4.6608 | 2.01488 | -2.3132 | 0.02071  | 0.06851  | 4.83751 | 7.66607 | 1.90977 | 0       | 0       | 0       | Down |
| Rpl38      | 1307.09 | -0.461  | 0.13277 | -3.4725 | 0.00052  | 0.00318  | 1550.9  | 1313.77 | 1677.73 | 1102.03 | 1159.52 | 1038.58 | Down |
| Ttyh2      | 662.097 | 1.04036 | 0.18295 | 5.6866  | 1.30E-08 | 2.29E-07 | 382.163 | 440.799 | 476.487 | 832.483 | 1085.59 | 755.056 | Up   |
| Dnaic2     | 2333.8  | -0.6101 | 0.22107 | -2.7597 | 0.00579  | 0.02448  | 2483.58 | 3297.37 | 2679.4  | 1983.24 | 1260.89 | 2298.35 | Down |
| Btbdl17    | 110.54  | 1.87656 | 0.34937 | 5.3712  | 7.82E-08 | 1.19E-06 | 30.96   | 64.2033 | 46.7893 | 214.6   | 126.723 | 179.967 | Up   |
| Gpr142     | 25.4428 | 2.10489 | 0.53403 | 3.94149 | 8.10E-05 | 0.00063  | 6.77251 | 15.3321 | 6.68418 | 44.5788 | 39.0729 | 40.216  | Up   |
| Cd300a     | 734.204 | 0.91106 | 0.18151 | 5.01928 | 5.19E-07 | 6.81E-06 | 549.541 | 550.999 | 428.742 | 882.245 | 1153.18 | 840.515 | Up   |
| Cd300lb    | 426.684 | 0.76985 | 0.28737 | 2.67891 | 0.00739  | 0.02982  | 440.213 | 295.144 | 211.029 | 479.999 | 684.304 | 449.414 | Up   |
| Cd300ld    | 376.644 | 1.02426 | 0.24919 | 4.11041 | 3.95E-05 | 0.00033  | 293.153 | 276.937 | 174.744 | 473.779 | 621.999 | 419.252 | Up   |
| Cd300c2    | 1264.07 | 1.80438 | 0.23336 | 7.73218 | 1.06E-14 | 5.07E-13 | 716.919 | 571.122 | 400.096 | 1903.41 | 2399.29 | 1593.56 | Up   |
| Slc9a3r1   | 5475.54 | 0.35297 | 0.12086 | 2.92036 | 0.0035   | 0.01606  | 4917.81 | 5062.48 | 4446.89 | 6919.04 | 5562.09 | 5944.94 | Up   |
| Nat9       | 1628.7  | -0.3376 | 0.11827 | -2.8548 | 0.00431  | 0.01912  | 1721.19 | 2033.42 | 1700.65 | 1509.46 | 1392.9  | 1414.6  | Down |
| Grin2c     | 158.821 | 0.84407 | 0.42787 | 1.97274 | 0.04853  | 0.13339  | 205.11  | 76.6607 | 59.2027 | 198.013 | 203.813 | 210.129 | Up   |
| Fdxr       | 494.327 | -0.3317 | 0.12179 | -2.7233 | 0.00646  | 0.02672  | 567.923 | 547.166 | 537.599 | 425.053 | 449.867 | 438.355 | Down |
| Fads6      | 253.479 | -0.9498 | 0.19917 | -4.7687 | 1.85E-06 | 2.15E-05 | 375.391 | 335.391 | 291.239 | 200.086 | 168.964 | 149.805 | Down |
| Jpt1       | 3750.02 | 0.31098 | 0.13614 | 2.2842  | 0.02236  | 0.07279  | 3194.69 | 3466.02 | 3381.24 | 4227.73 | 4744.72 | 3485.72 | Up   |
| Nup85      | 2249.2  | -0.3415 | 0.09696 | -3.5222 | 0.00043  | 0.00271  | 2449.71 | 2483.81 | 2608.74 | 2005.01 | 2091.99 | 1855.97 | Down |
| Grb2       | 5547.49 | 0.37712 | 0.11219 | 3.36141 | 0.00078  | 0.0045   | 5309.65 | 4633.18 | 4536.65 | 6304.27 | 6712.1  | 5789.1  | Up   |
| Caskin2    | 7105.25 | -0.4317 | 0.10952 | -3.9419 | 8.08E-05 | 0.00063  | 7597.79 | 7699.61 | 9184.06 | 5950.75 | 6203.09 | 5996.21 | Down |
| Lgl2       | 3520.97 | 0.34942 | 0.11397 | 3.06578 | 0.00217  | 0.01067  | 3055.37 | 2959.1  | 3275.25 | 4200.77 | 4137.51 | 3497.79 | Up   |
| Itgb4      | 1828.6  | -0.7578 | 0.14423 | -5.2539 | 1.49E-07 | 2.15E-06 | 2517.44 | 2165.66 | 2211.51 | 1424.45 | 1138.4  | 1514.13 | Down |
| Trim47     | 1325.61 | -0.2899 | 0.09189 | -3.1549 | 0.00161  | 0.00829  | 1490.92 | 1452.72 | 1431.37 | 1175.64 | 1218.65 | 1184.36 | Down |
| Acox1      | 10718   | 0.33218 | 0.1232  | 2.6964  | 0.00701  | 0.02856  | 10688   | 9638.17 | 8142.29 | 11734.6 | 12337.5 | 11767.2 | Up   |
| Ten1       | 894.563 | 0.34696 | 0.15332 | 2.26294 | 0.02364  | 0.07618  | 675.316 | 761.816 | 925.282 | 955.852 | 1071.87 | 977.25  | Up   |
| Evpl       | 682.79  | -0.5576 | 0.13148 | -4.2409 | 2.23E-05 | 0.0002   | 793.351 | 760.857 | 885.176 | 595.075 | 515.34  | 546.938 | Down |
| Gm11739    | 24.7038 | -1.1305 | 0.46676 | -2.4221 | 0.01543  | 0.05429  | 31.9275 | 29.706  | 40.1051 | 17.6242 | 14.7844 | 14.0756 | Down |
| Sphk1      | 2208.23 | -0.9509 | 0.16574 | -5.7374 | 9.62E-09 | 1.75E-07 | 2769.96 | 2648.63 | 3313.44 | 1809.07 | 1441.47 | 1266.81 | Down |
| Cygb       | 1926.39 | -0.2826 | 0.13399 | -2.1088 | 0.03496  | 0.10317  | 2238.8  | 2321.86 | 1782.77 | 1792.48 | 1657.96 | 1764.48 | Down |
| Prcd       | 530.737 | 1.01533 | 0.2042  | 4.97228 | 6.62E-07 | 8.52E-06 | 421.831 | 317.184 | 315.111 | 727.775 | 566.03  | 836.494 | Up   |
| St6galnac1 | 726.395 | 0.53869 | 0.18837 | 2.85968 | 0.00424  | 0.01887  | 674.349 | 532.792 | 570.065 | 807.602 | 713.873 | 1059.69 | Up   |
| Gm11735    | 1210.47 | 2.02518 | 0.72382 | 2.7979  | 0.00514  | 0.02222  | 517.613 | 548.124 | 366.675 | 1330.11 | 694.865 | 3805.44 | Up   |
| St6galnac2 | 283.365 | 1.88389 | 0.83216 | 2.26385 | 0.02358  | 0.07607  | 160.605 | 114.033 | 87.8492 | 121.987 | 126.723 | 928.99  | Up   |
| Mkra7      | 3153.2  | -0.5007 | 0.11934 | -4.1955 | 2.72E-05 | 0.00024  | 3604.91 | 3773.62 | 3705.9  | 2545.14 | 2961.1  | 2328.51 | Down |
| Jmjd6      | 2212.44 | -0.2748 | 0.10971 | -2.5051 | 0.01224  | 0.04512  | 2398.44 | 2281.61 | 2587.73 | 2102.46 | 1833.26 | 2071.13 | Down |
| Mettl23    | 1143.74 | -0.2757 | 0.11859 | -2.3245 | 0.0201   | 0.06705  | 1220.99 | 1274.48 | 1262.36 | 1128.98 | 1048.63 | 926.98  | Down |
| Mfsd11     | 2131.54 | 0.23639 | 0.12027 | 1.96545 | 0.04936  | 0.1354   | 2013.37 | 2080.38 | 1777.99 | 2407.25 | 2433.08 | 2077.16 | Up   |
| Snhg20     | 950.696 | -0.6324 | 0.14229 | -4.4445 | 8.81E-06 | 8.78E-05 | 1194.86 | 1006.17 | 1266.17 | 773.39  | 790.963 | 672.613 | Down |
| Gm11730    | 90.801  | -0.7741 | 0.31452 | -2.4613 | 0.01384  | 0.04984  | 128.678 | 85.285  | 129.864 | 50.7991 | 70.7537 | 79.4267 | Down |
| Septin9    | 5932.17 | 0.46517 | 0.12742 | 3.6508  | 0.00026  | 0.00175  | 5535.08 | 4816.21 | 4600.63 | 6659.86 | 7720.6  | 6260.63 | Up   |
| Gm11734    | 185.495 | -1.4462 | 0.33266 | -4.3473 | 1.38E-05 | 0.00013  | 184.793 | 344.973 | 284.555 | 83.974  | 73.9218 | 140.756 | Down |
| 2900041M   | 44.054  | -0.8771 | 0.43872 | -1.9991 | 0.04559  | 0.12684  | 71.5951 | 57.4955 | 42.0148 | 43.5421 | 29.5687 | 20.108  | Down |
| Tnrc6c     | 2554.56 | -0.3122 | 0.092   | -3.3936 | 0.00069  | 0.00408  | 2913.15 | 2746.37 | 2830.27 | 2149.11 | 2312.7  | 2375.76 | Down |
| Tmc6       | 3492.99 | -0.3325 | 0.11565 | -2.8748 | 0.00404  | 0.01814  | 3727.78 | 4333.25 | 3619.96 | 3276.02 | 3118.44 | 2882.48 | Down |
| Tha1       | 516.681 | 0.29184 | 0.13424 | 2.17402 | 0.0297   | 0.09119  | 420.863 | 484.879 | 487.945 | 553.606 | 599.822 | 552.97  | Up   |
| Socs3      | 5076.83 | 1.58994 | 0.14802 | 10.7412 | 6.52E-27 | 1.06E-24 | 2259.12 | 2542.26 | 2793.99 | 7251.83 | 8952.98 | 6660.78 | Up   |
| Pgs1       | 4457.28 | 0.78546 | 0.09642 | 8.14639 | 3.75E-16 | 2.23E-14 | 3276.93 | 3030.01 | 3512.06 | 5536.06 | 5818.7  | 5569.92 | Up   |
| Dnah17     | 79.1617 | 0.65804 | 0.28281 | 2.32679 | 0.01998  | 0.06676  | 56.1151 | 53.6625 | 74.4809 | 100.561 | 86.5941 | 103.556 | Up   |
| Timp2      | 26892.5 | -0.2407 | 0.10476 | -2.2973 | 0.0216   | 0.07083  | 31570.5 | 27630.4 | 28190.1 | 24690.4 | 26460.8 | 22812.5 | Down |
| Lgals3bp   | 17119.8 | 1.68253 | 0.1999  | 8.4168  | 3.87E-17 | 2.62E-15 | 8928.1  | 9055.54 | 6415.86 | 29339.1 | 19386.5 | 29594   | Up   |
| Cant1      | 4328.89 | 0.36773 | 0.09503 | 3.86967 | 0.00011  | 0.00082  | 3946.44 | 3583.89 | 3809.98 | 4930.62 | 5123.84 | 4578.6  | Up   |
| Gm11747    | 626.753 | -0.8721 | 0.16473 | -5.2941 | 1.20E-07 | 1.75E-06 | 741.106 | 959.217 | 731.44  | 479.999 | 444.587 | 404.171 | Down |
| Engase     | 641.523 | -0.3778 | 0.17644 | -2.1415 | 0.03223  | 0.09674  | 643.388 | 883.514 | 648.365 | 535.982 | 519.564 | 618.322 | Down |
| Rbfox3     | 91.5542 | -0.8827 | 0.25969 | -3.399  | 0.00068  | 0.00401  | 113.198 | 108.283 | 134.638 | 58.0561 | 71.8097 | 63.3403 | Down |
| Ccdc40     | 2780.52 | -0.5856 | 0.23577 | -2.4836 | 0.01301  | 0.04738  | 3077.62 | 3719.96 | 3214.14 | 2510.93 | 1386.56 | 2773.9  | Down |
| Gaa        | 7096.1  | 0.34436 | 0.1296  | 2.65706 | 0.00788  | 0.03142  | 6760.9  | 6668.52 | 5330.16 | 7828.24 | 8575.98 | 7412.82 | Up   |
| Sgsh       | 498.925 | 1.00431 | 0.17297 | 5.80619 | 6.39E-09 | 1.21E-07 | 366.683 | 264.479 | 364.765 | 658.315 | 631.503 | 707.802 | Up   |
| Endov      | 1534.76 | 0.2523  | 0.10923 | 2.30986 | 0.0209   | 0.06898  | 1350.63 | 1315.69 | 1536.41 | 1698.14 | 1613.61 | 1694.1  | Up   |
| Gm11762    | 3.74635 | 3.42481 | 1.57987 | 2.16778 | 0.03018  | 0.09218  | 0       | 0       | 1.90977 | 5.18358 | 6.33615 | 9.04861 | Up   |
| Chmp6      | 1525.45 | 0.34251 | 0.15436 | 2.21886 | 0.0265   | 0.08343  | 1300.32 | 1441.22 | 1293.87 | 1719.91 | 1994.83 | 1402.53 | Up   |
| Ndufa8     | 498.859 | -0.366  | 0.14807 | -2.4718 | 0.01345  | 0.04868  | 502.133 | 555.79  | 627.358 | 459.265 | 441.419 | 407.187 | Down |
| Slc38a10   | 7251.23 | 0.35831 | 0.09646 | 3.71464 | 0.0002   | 0.00141  | 6942.79 | 6022.66 | 6100.75 | 7952.65 | 8325.7  | 8162.85 | Up   |
| 2810410L   | 1121.96 | -0.3412 | 0.16613 | -2.0536 | 0.04001  | 0.11456  | 1187.12 | 1160.45 | 1414.18 | 984.88  | 1163.74 | 821.413 | Down |
| Gm11770    | 1.91152 | 4.43453 | 2.2058  | 2.0104  | 0.04439  | NA       | 0       | 0       | 0       | 5.18358 | 5.28013 | 1.0054  | Up   |
| Actg1      | 47182.3 | 0.44384 | 0.11477 | 3.86706 | 0.00011  | 0.00083  | 35294.5 | 40596.6 | 44052.6 | 52718   | 57905   | 52527.2 | Up   |
| 0610009L   | 195.748 | -0.8232 | 0.21919 | -3.7556 | 0.00017  | 0.00123  | 206.078 | 275.978 | 268.322 | 119.222 | 152.068 | 152.821 | Down |
| Oxld1      | 221.256 | -0.4358 | 0.19502 | -2.2348 | 0.02543  | 0.08077  | 240.908 | 297.06  | 225.352 | 199.049 | 172.132 | 193.037 | Down |
| Ccdc137    | 1732.5  | -0.221  | 0.11152 | -1.9817 | 0.04752  | 0.13117  | 1896.3  | 1754.57 | 1944.14 | 1660.82 | 1453.09 | 1686.06 | Down |
| Slc25a10   | 4959.09 | 0.33323 | 0.1061  | 3.14065 | 0.00169  | 0.00863  | 4573.38 | 4465.49 | 4127.   |         |         |         |      |

|          |         |         |         |         |          |          |         |         |         |         |         |         |      |
|----------|---------|---------|---------|---------|----------|----------|---------|---------|---------|---------|---------|---------|------|
| Lrrc45   | 4782.06 | -0.2965 | 0.14415 | -2.057  | 0.03969  | 0.11382  | 4644.97 | 5471.66 | 5698.74 | 4690.1  | 3605.27 | 4581.61 | Down |
| Cbr2     | 284462  | -0.2791 | 0.13594 | -2.0531 | 0.04007  | 0.11469  | 333171  | 298938  | 303566  | 296682  | 216221  | 258192  | Down |
| Gm11771  | 234.326 | -0.4208 | 0.2119  | -1.986  | 0.04703  | 0.1301   | 277.673 | 298.018 | 229.172 | 233.261 | 164.74  | 203.091 | Down |
| Rfng     | 1646.63 | -0.2324 | 0.10708 | -2.1704 | 0.02998  | 0.09176  | 1816    | 1650.12 | 1870.62 | 1521.9  | 1592.49 | 1428.67 | Down |
| Fasn     | 38407.2 | 1.69596 | 0.17898 | 9.47589 | 2.64E-21 | 2.62E-19 | 17850.4 | 22763.4 | 13736.9 | 54575.8 | 61003.4 | 60513.1 | Up   |
| Slc16a3  | 1101.02 | -0.2775 | 0.11478 | -2.4178 | 0.01562  | 0.05481  | 1276.13 | 1224.65 | 1119.12 | 1029.46 | 927.19  | 1029.53 | Down |
| Gm11775  | 37.8213 | 2.72843 | 0.63004 | 4.33054 | 1.49E-05 | 0.00014  | 8.70751 | 12.4574 | 8.59395 | 101.598 | 22.1765 | 73.3943 | Up   |
| Sectm1b  | 248.523 | 3.93796 | 0.43468 | 9.05954 | 1.31E-19 | 1.10E-17 | 42.5701 | 28.7478 | 20.0525 | 650.021 | 203.813 | 545.933 | Up   |
| Sectm1a  | 127.208 | 4.23912 | 0.50529 | 8.38949 | 4.88E-17 | 3.24E-15 | 12.5775 | 7.66607 | 18.1428 | 267.473 | 103.49  | 353.901 | Up   |
| Fn3k     | 196.965 | -1.1641 | 0.22407 | -5.1954 | 2.04E-07 | 2.89E-06 | 254.453 | 335.391 | 227.262 | 119.222 | 128.835 | 116.627 | Down |
| Tbcd     | 2612.46 | 0.50709 | 0.09031 | 5.61491 | 1.97E-08 | 3.35E-07 | 2262.99 | 2173.33 | 2037.72 | 3031.36 | 3130.06 | 3039.33 | Up   |
| B3gnt1   | 360.329 | 0.47192 | 0.18498 | 2.55122 | 0.01073  | 0.04057  | 316.373 | 338.265 | 251.134 | 362.851 | 451.979 | 441.371 | Up   |
| Metrl    | 1045.23 | 0.75024 | 0.2187  | 3.43038 | 0.0006   | 0.00363  | 920.094 | 842.309 | 575.794 | 1407.86 | 1504.84 | 1020.48 | Up   |
| Rab10    | 1315.08 | 0.38568 | 0.11041 | 3.49305 | 0.00048  | 0.00298  | 1162.94 | 1066.54 | 1191.69 | 1490.8  | 1395.01 | 1583.51 | Up   |
| Asxl2    | 2194.28 | 0.29191 | 0.11249 | 2.59496 | 0.00946  | 0.0365   | 2184.62 | 1918.43 | 1816.19 | 2301.51 | 2461.6  | 2483.34 | Up   |
| Dnmt3a   | 2144.52 | 0.37717 | 0.09512 | 3.96532 | 7.33E-05 | 0.00058  | 1980.48 | 1840.81 | 1776.08 | 2342.98 | 2480.6  | 2446.14 | Up   |
| Efr3b    | 706.346 | 0.56668 | 0.12971 | 4.36864 | 1.25E-05 | 0.00012  | 574.696 | 542.374 | 591.073 | 753.692 | 895.51  | 880.731 | Up   |
| Dnajc27  | 708.888 | -0.4476 | 0.16463 | -2.719  | 0.00655  | 0.02699  | 774.001 | 886.389 | 793.508 | 490.367 | 692.753 | 616.311 | Down |
| Cenpo    | 401.409 | 0.3119  | 0.12905 | 2.41689 | 0.01565  | 0.05492  | 366.683 | 357.43  | 350.442 | 435.421 | 454.091 | 444.387 | Up   |
| Ncoa1    | 2995.2  | 0.53194 | 0.08378 | 6.34939 | 2.16E-10 | 5.42E-09 | 2537.76 | 2463.68 | 2346.15 | 3525.87 | 3577.81 | 3519.91 | Up   |
| Itsn2    | 7000.73 | 0.55426 | 0.09326 | 5.94325 | 2.79E-09 | 5.68E-08 | 5750.83 | 5425.66 | 5840.06 | 7949.54 | 8949.81 | 8088.45 | Up   |
| Fam228b  | 66.1375 | -0.8649 | 0.33294 | -2.5979 | 0.00938  | 0.03626  | 64.8226 | 85.285  | 105.992 | 46.6522 | 53.8573 | 40.216  | Down |
| Fkbp1b   | 423.506 | 0.57573 | 0.17158 | 3.35545 | 0.00079  | 0.00458  | 378.293 | 356.472 | 285.51  | 532.872 | 536.461 | 451.425 | Up   |
| Mfsd2b   | 421.494 | -0.6523 | 0.1987  | -3.2827 | 0.00103  | 0.0057   | 416.026 | 556.748 | 572.93  | 322.419 | 278.791 | 382.052 | Down |
| Ubxn2a   | 1904.27 | 0.51774 | 0.12028 | 4.30441 | 1.67E-05 | 0.00016  | 1719.25 | 1413.43 | 1566.01 | 2075.51 | 2294.74 | 2356.66 | Up   |
| 2810032G | 96.3616 | 1.3803  | 0.31327 | 4.40609 | 1.05E-05 | 0.0001   | 68.6926 | 49.8294 | 42.0148 | 126.479 | 117.219 | 173.934 | Up   |
| Apob     | 145.52  | 1.38217 | 0.43821 | 3.15415 | 0.00161  | 0.00831  | 79.3351 | 112.116 | 50.6088 | 115.075 | 34.004  | 175.945 | Up   |
| Ldah     | 2940.43 | 0.38694 | 0.0987  | 3.92039 | 8.84E-05 | 0.00068  | 2616.12 | 2641.92 | 2387.21 | 3460.56 | 3410.96 | 3125.79 | Up   |
| Gm48898  | 197.207 | 0.81745 | 0.39782 | 2.05484 | 0.03989  | 0.11427  | 124.808 | 233.815 | 69.7065 | 263.326 | 292.519 | 199.069 | Up   |
| Gm4755   | 33.066  | 1.15683 | 0.42912 | 2.69583 | 0.00702  | 0.0286   | 20.3175 | 20.1234 | 21.0074 | 33.1749 | 46.4651 | 57.3078 | Up   |
| Sdc1     | 21271.4 | 1.17454 | 0.11281 | 10.4114 | 2.20E-25 | 3.08E-23 | 14684.7 | 11682.1 | 12816.4 | 30285.6 | 29717.6 | 28441.8 | Up   |
| Wdr35    | 2025.55 | -0.5012 | 0.1601  | -3.1308 | 0.00174  | 0.00888  | 2278.47 | 2563.34 | 2280.26 | 1691.92 | 1350.66 | 1988.68 | Down |
| Osr1     | 474.278 | -0.7929 | 0.1748  | -4.5358 | 5.74E-06 | 5.98E-05 | 506.971 | 641.075 | 656.005 | 357.667 | 383.337 | 300.615 | Down |
| Gm5182   | 187.035 | 0.87281 | 0.31806 | 2.74417 | 0.00607  | 0.02539  | 201.24  | 101.575 | 93.5785 | 240.518 | 266.118 | 219.177 | Up   |
| Rdh14    | 1370.04 | -0.3482 | 0.11926 | -2.92   | 0.0035   | 0.01606  | 1537.36 | 1688.45 | 1377.9  | 1243.02 | 1211.26 | 1162.24 | Down |
| Gm38407  | 89.8847 | 0.61274 | 0.26093 | 2.3483  | 0.01886  | 0.06379  | 79.3351 | 69.9529 | 63.9772 | 93.3044 | 115.107 | 117.632 | Up   |
| Gen1     | 80.2155 | 0.92448 | 0.36233 | 2.55148 | 0.01073  | 0.04056  | 49.3426 | 74.7442 | 42.0148 | 73.6068 | 110.883 | 130.702 | Up   |
| Vsn1     | 735.243 | -0.5616 | 0.16536 | -3.3959 | 0.00068  | 0.00405  | 759.489 | 901.721 | 968.251 | 542.202 | 694.865 | 544.927 | Down |
| Gm4294   | 211.524 | -0.4779 | 0.22572 | -2.1171 | 0.03425  | 0.1015   | 272.835 | 252.022 | 213.894 | 135.81  | 198.533 | 196.053 | Down |
| Mycn     | 127.217 | 1.23593 | 0.3134  | 3.94364 | 8.03E-05 | 0.00063  | 65.7901 | 70.9111 | 90.7139 | 138.92  | 248.166 | 148.799 | Up   |
| Trib2    | 5241.39 | -0.5145 | 0.14022 | -3.669  | 0.00024  | 0.00164  | 5342.54 | 6418.42 | 6737.65 | 4148.94 | 3890.4  | 4910.38 | Down |
| Lpin1    | 2461.7  | 0.39855 | 0.20149 | 1.97802 | 0.04793  | 0.13209  | 2461.32 | 2402.35 | 1507.76 | 2550.32 | 3209.26 | 2639.18 | Up   |
| Ntsr2    | 69.9892 | 1.46679 | 0.47593 | 3.08196 | 0.00206  | 0.01019  | 48.3751 | 49.8294 | 13.3684 | 117.149 | 108.771 | 82.4429 | Up   |
| Greb1    | 64.3076 | -0.9725 | 0.30314 | -3.208  | 0.00134  | 0.00712  | 96.7501 | 81.452  | 77.3455 | 47.6889 | 45.4091 | 37.1998 | Down |
| E2f6     | 2067.77 | -0.4859 | 0.09878 | -4.9187 | 8.71E-07 | 1.09E-05 | 2309.43 | 2600.71 | 2328    | 1688.81 | 1719.21 | 1760.46 | Down |
| Rock2    | 11069.6 | -0.2957 | 0.1231  | -2.4023 | 0.01629  | 0.05672  | 10519.6 | 12262.8 | 13818.1 | 9623.83 | 10060.8 | 10132.4 | Down |
| Pqlc3    | 3744.4  | 0.51927 | 0.12549 | 4.13802 | 3.50E-05 | 0.0003   | 3325.3  | 2933.23 | 2974.46 | 4245.35 | 5007.67 | 3980.38 | Up   |
| Pdia6    | 14351.4 | 0.23303 | 0.10036 | 2.32207 | 0.02023  | 0.06734  | 12310.5 | 12663.4 | 14610.7 | 15670   | 15294.4 | 15559.6 | Up   |
| Atp6v1c2 | 5269.51 | 0.54981 | 0.13129 | 4.18784 | 2.82E-05 | 0.00025  | 4977.8  | 3673.01 | 4181.43 | 6212    | 6298.14 | 6274.71 | Up   |
| Gm36862  | 7.59958 | -2.1841 | 0.98345 | -2.2208 | 0.02636  | 0.08308  | 5.80501 | 21.0817 | 10.5037 | 2.07343 | 2.11205 | 4.0216  | Down |
| Gm49329  | 835.343 | -0.5778 | 0.13305 | -4.3428 | 1.41E-05 | 0.00013  | 914.289 | 1007.13 | 1079.97 | 618.919 | 655.792 | 735.953 | Down |
| 5730507C | 73.5292 | 1.33894 | 0.37497 | 3.57081 | 0.00036  | 0.00231  | 53.2126 | 41.2051 | 30.5563 | 85.0107 | 145.732 | 85.4591 | Up   |
| Gm10479  | 2.06943 | 4.55018 | 2.1549  | 2.11155 | 0.03473  | NA       | 0       | 0       | 0       | 8.29373 | 2.11205 | 2.0108  | Up   |
| 1700030C | 215.2   | -1.1759 | 0.41262 | -2.8498 | 0.00438  | 0.01937  | 140.288 | 408.218 | 346.622 | 98.488  | 104.547 | 193.037 | Down |
| Itgb1bp1 | 1435.23 | 0.24261 | 0.11282 | 2.15052 | 0.03151  | 0.0952   | 1388.36 | 1281.19 | 1274.77 | 1574.77 | 1670.63 | 1421.64 | Up   |
| Cpsf3    | 3724.74 | 0.42046 | 0.1153  | 3.64653 | 0.00027  | 0.00178  | 3563.31 | 3039.6  | 2954.41 | 4442.33 | 4361.38 | 3987.42 | Up   |
| Iah1     | 1569.84 | 0.76063 | 0.2414  | 3.15095 | 0.00163  | 0.00839  | 1689.26 | 872.015 | 934.83  | 1971.83 | 1863.88 | 2087.21 | Up   |
| Adam17   | 3228.77 | 0.61674 | 0.09121 | 6.76157 | 1.37E-11 | 4.18E-10 | 2560.01 | 2500.1  | 2586.78 | 3646.13 | 4030.85 | 4048.75 | Up   |
| Grhl1    | 521.453 | -1.0662 | 0.16986 | -6.277  | 3.45E-10 | 8.27E-09 | 741.106 | 729.235 | 647.411 | 344.19  | 276.679 | 390.096 | Down |
| Klf11    | 3148.23 | -0.3098 | 0.13755 | -2.2522 | 0.02431  | 0.07789  | 3888.39 | 2897.77 | 3668.66 | 2658.14 | 2923.08 | 2853.33 | Down |
| Rrm2     | 292.659 | 1.09542 | 0.22571 | 4.85327 | 1.21E-06 | 1.47E-05 | 185.76  | 211.775 | 162.33  | 474.816 | 302.023 | 419.252 | Up   |
| Mboat2   | 266.462 | -0.6735 | 0.31916 | -2.1103 | 0.03483  | 0.10285  | 233.168 | 505.961 | 243.495 | 227.041 | 210.149 | 178.961 | Down |
| Id2      | 4916.65 | 1.08919 | 0.1615  | 6.7444  | 1.54E-11 | 4.67E-10 | 3463.66 | 3122.01 | 2846.51 | 6954.29 | 7780.79 | 5332.65 | Up   |
| Gm36723  | 137.299 | 0.87675 | 0.3188  | 2.75015 | 0.00596  | 0.02502  | 140.288 | 87.2015 | 63.0223 | 161.728 | 179.524 | 192.032 | Up   |
| Gm9866   | 3.60021 | 4.32213 | 1.66039 | 2.60308 | 0.00924  | 0.03579  | 0       | 0.95826 | 0       | 9.33044 | 5.28013 | 6.03241 | Up   |
| Gm31333  | 9.51557 | 2.68555 | 0.83368 | 3.22133 | 0.00128  | 0.00685  | 2.9025  | 2.87478 | 1.90977 | 14.514  | 14.7844 | 20.108  | Up   |
| Sntg2    | 129.549 | -1.1727 | 0.3356  | -3.4944 | 0.00048  | 0.00297  | 147.06  | 259.688 | 131.774 | 70.4967 | 70.7537 | 97.5239 | Down |
| Acp1     | 2335.87 | 0.46594 | 0.2102  | 2.2167  | 0.02664  | 0.08376  | 2694.49 | 1652.04 | 1539.27 | 2820.9  | 2621.05 | 2687.44 | Up   |
| Sh3yl1   | 843.253 | 0.67403 | 0.1558  | 4.32618 | 1.52E-05 | 0.00014  | 727.561 | 693.779 | 528.05  | 1089.59 | 1000.06 | 1020.48 | Up   |
| Fam110c  | 367.78  | 0.98842 | 0.16294 | 6.06632 | 1.31E-09 | 2.84E-08 | 259.29  | 220.399 | 259.728 | 489.33  | 538.573 | 439.36  | Up   |
| Lamb1    | 5238.09 | -0.4005 | 0.12652 | -3.1653 | 0.00155  | 0.00804  | 5234.18 | 5904.79 | 6742.43 | 4858.05 | 4307.53 | 4381.54 | Down |
| Dld      | 6274.33 | -0.3112 | 0.12522 | -2.4852 | 0.01295  | 0.04719  | 6180.4  | 8027.33 | 6637.39 | 5690.53 | 5739.5  | 5370.85 | Down |
| Slc26a4  | 4875.53 | 4.96379 | 0.18975 | 26.1591 | #####    | #####    | 381.196 | 306.643 | 220.578 | 8796.53 | 9064.92 | 10483.3 | Up   |
| Bcap29   | 2819.68 | 0.77812 | 0.12919 | 6.02287 | 1.71E-09 | 3.60E-08 | 2167.2  | 2300.78 | 1763.67 | 3396.28 | 3628.5  | 3661.67 | Up   |
| Cog5     | 806.818 | 0.39074 | 0.12096 | 3.23032 | 0.00124  | 0.00667  | 751.749 | 663.115 | 679.877 | 852.18  | 939.863 | 954.125 | Up   |
| Hbp1     | 630.08  | 0.41649 | 0.13175 | 3.16126 | 0.00157  | 0.00814  | 579.533 | 490.628 | 549.058 | 755.766 | 732.882 | 672.613 | Up   |
| 5430401H | 27.5728 | 1.54581 | 0.51164 | 3.0213  | 0.00252  | 0.01211  | 11.61</ |         |         |         |         |         |      |

|           |         |         |         |         |          |          |         |         |         |         |         |         |      |
|-----------|---------|---------|---------|---------|----------|----------|---------|---------|---------|---------|---------|---------|------|
| Agr2      | 952.405 | 2.63061 | 0.84959 | 3.09633 | 0.00196  | 0.0098   | 140.288 | 564.414 | 89.759  | 1718.87 | 899.734 | 2301.36 | Up   |
| Tspan13   | 14631   | -0.5622 | 0.11413 | -4.9263 | 8.38E-07 | 1.05E-05 | 16613.9 | 16067.1 | 19658.2 | 11292.9 | 12522.3 | 11631.5 | Down |
| Crppa     | 407.728 | -0.426  | 0.14744 | -2.8896 | 0.00386  | 0.01743  | 424.733 | 515.543 | 462.163 | 332.786 | 363.273 | 347.869 | Down |
| Agmo      | 2746.78 | 0.51881 | 0.12655 | 4.09969 | 4.14E-05 | 0.00035  | 2217.51 | 2538.43 | 2018.62 | 3074.9  | 3116.33 | 3514.88 | Up   |
| Dgkb      | 198.185 | -0.6042 | 0.20092 | -3.0073 | 0.00264  | 0.01259  | 241.875 | 229.982 | 245.405 | 188.682 | 139.395 | 143.772 | Down |
| Etv1      | 1172.34 | -0.543  | 0.09621 | -5.6441 | 1.66E-08 | 2.87E-07 | 1397.07 | 1413.43 | 1360.71 | 987.99  | 938.807 | 936.028 | Down |
| Arl4a     | 2597.26 | -0.8185 | 0.18263 | -4.4816 | 7.41E-06 | 7.54E-05 | 3023.44 | 3888.61 | 3032.71 | 2239.31 | 1473.16 | 1926.35 | Down |
| Scin      | 47.2392 | -1.031  | 0.43207 | -2.3861 | 0.01703  | 0.05881  | 69.6601 | 83.3685 | 37.2404 | 30.0648 | 36.9609 | 26.1404 | Down |
| Lsmem1    | 50.5321 | -1.4872 | 0.53853 | -2.7616 | 0.00575  | 0.02435  | 37.7326 | 130.323 | 55.3832 | 32.1382 | 28.5127 | 19.1026 | Down |
| Ifrd1     | 6101.07 | -0.4011 | 0.12261 | -3.2714 | 0.00107  | 0.0059   | 6469.68 | 6994.33 | 7366.92 | 5494.59 | 5718.38 | 4562.51 | Down |
| Dock4     | 3819.93 | -0.6296 | 0.10782 | -5.8396 | 5.23E-09 | 1.01E-07 | 4529.84 | 4393.62 | 4997.86 | 2842.67 | 3262.06 | 2893.54 | Down |
| Immp2l    | 279.864 | -0.8184 | 0.38871 | -2.1054 | 0.03525  | 0.10388  | 337.658 | 462.839 | 271.187 | 233.261 | 88.7061 | 285.534 | Down |
| Dnajb9    | 4985.88 | 0.35855 | 0.10855 | 3.30313 | 0.00096  | 0.00537  | 4526.94 | 4370.62 | 4211.03 | 6176.75 | 5072.09 | 5557.86 | Up   |
| Stxbp6    | 1940.45 | -0.7246 | 0.10901 | -6.647  | 2.99E-11 | 8.65E-10 | 2204.94 | 2401.4  | 2646.94 | 1465.92 | 1464.71 | 1458.84 | Down |
| Nova1     | 740.297 | -1.1188 | 0.1923  | -5.8181 | 5.95E-09 | 1.13E-07 | 852.369 | 1121.16 | 1067.56 | 416.76  | 579.758 | 404.171 | Down |
| Scfd1     | 3249.59 | 0.25426 | 0.0821  | 3.09693 | 0.00196  | 0.00978  | 2990.55 | 3040.55 | 2860.83 | 3619.18 | 3500.72 | 3485.72 | Up   |
| Coch      | 118.213 | -1.4717 | 0.38732 | -3.7996 | 0.00014  | 0.00105  | 141.255 | 271.187 | 108.857 | 49.7624 | 72.8658 | 65.3511 | Down |
| Ap4s1     | 1621.4  | -0.3001 | 0.11032 | -2.7204 | 0.00652  | 0.02692  | 1673.78 | 1863.81 | 1830.51 | 1387.13 | 1576.65 | 1396.5  | Down |
| Heatr5a   | 3493.48 | 0.58866 | 0.12369 | 4.75925 | 1.94E-06 | 2.25E-05 | 2629.67 | 2670.67 | 3070.9  | 4047.34 | 4685.58 | 3856.72 | Up   |
| Nubpl     | 608.922 | -0.7509 | 0.20443 | -3.6733 | 0.00024  | 0.00162  | 687.894 | 988.923 | 614.945 | 483.11  | 418.186 | 460.474 | Down |
| Akap6     | 517.127 | -1.8027 | 0.40914 | -4.4062 | 1.05E-05 | 0.0001   | 541.801 | 1406.72 | 463.118 | 249.849 | 144.675 | 296.593 | Down |
| Snx6      | 5623.25 | 0.26085 | 0.10144 | 2.57153 | 0.01013  | 0.03863  | 5140.34 | 4801.83 | 5406.55 | 5686.39 | 6526.24 | 6178.19 | Up   |
| Cfl2      | 5927.72 | -0.3652 | 0.09888 | -3.693  | 0.00022  | 0.00152  | 6361.32 | 7335.47 | 6325.14 | 5246.82 | 5101.66 | 5195.91 | Down |
| Baz1a     | 2362.61 | 0.87424 | 0.12838 | 6.80968 | 9.78E-12 | 3.06E-10 | 1861.47 | 1563.88 | 1578.42 | 3380.73 | 2790.02 | 3001.12 | Up   |
| 2700097C  | 788.022 | -0.4348 | 0.13651 | -3.1852 | 0.00145  | 0.00761  | 887.199 | 861.475 | 969.206 | 640.69  | 612.495 | 757.067 | Down |
| Ppp2r3c   | 1283.85 | 0.3351  | 0.10961 | 3.05712 | 0.00223  | 0.01093  | 1077.8  | 1209.32 | 1119.12 | 1336.33 | 1481.6  | 1478.94 | Up   |
| Prorp     | 662.181 | 0.54777 | 0.11088 | 4.94029 | 7.80E-07 | 9.89E-06 | 524.386 | 540.458 | 549.058 | 802.418 | 763.506 | 793.261 | Up   |
| Gm19990   | 461.278 | 0.52643 | 0.22191 | 2.37229 | 0.01768  | 0.06056  | 476.011 | 317.184 | 340.893 | 639.654 | 557.581 | 436.344 | Up   |
| Mbip      | 5336.66 | 0.71826 | 0.07835 | 9.16699 | 4.86E-20 | 4.23E-18 | 4032.55 | 3970.07 | 4102.18 | 6662.97 | 6837.76 | 6414.46 | Up   |
| Sfta3-ps  | 19865.8 | 0.3795  | 0.10538 | 3.60114 | 0.00032  | 0.00208  | 16789.1 | 16285.6 | 18729.1 | 21130.3 | 24337.2 | 21923.8 | Up   |
| Nkx2-1    | 14498.2 | 0.53215 | 0.1128  | 4.71742 | 2.39E-06 | 2.71E-05 | 12349.2 | 10659.7 | 12553.8 | 18665   | 16706.3 | 16055.2 | Up   |
| Gm48835   | 169.191 | 0.60681 | 0.30803 | 1.96999 | 0.04884  | 0.13406  | 128.678 | 137.031 | 136.548 | 189.719 | 291.463 | 131.708 | Up   |
| Mia2      | 7009.85 | 0.63211 | 0.10445 | 6.0516  | 1.43E-09 | 3.09E-08 | 5919.17 | 5585.69 | 4990.22 | 8529.06 | 8104.99 | 8929.97 | Up   |
| Fbxo33    | 2033.15 | 0.37191 | 0.14751 | 2.52137 | 0.01169  | 0.04346  | 1905.98 | 1643.41 | 1768.44 | 2319.13 | 1917.74 | 2644.2  | Up   |
| Fkbp3     | 1510.53 | -0.276  | 0.13764 | -2.0052 | 0.04494  | 0.12553  | 1616.69 | 1753.61 | 1593.7  | 1380.91 | 1166.91 | 1551.33 | Down |
| Rpl17-ps3 | 569.396 | -0.5459 | 0.12549 | -4.3499 | 1.36E-05 | 0.00013  | 631.778 | 716.777 | 678.922 | 482.073 | 460.427 | 446.398 | Down |
| Rps29     | 1657.16 | -0.5285 | 0.12756 | -4.1436 | 3.42E-05 | 0.00029  | 2165.27 | 1855.19 | 1851.52 | 1466.95 | 1385.51 | 1218.55 | Down |
| Pole2     | 164.041 | 0.54848 | 0.2241  | 2.44744 | 0.01439  | 0.05135  | 155.768 | 124.574 | 119.36  | 165.875 | 218.597 | 200.075 | Up   |
| Nemf      | 4076.06 | 0.25192 | 0.0795  | 3.16895 | 0.00153  | 0.00796  | 3756.81 | 3660.55 | 3746.01 | 4550.15 | 4275.85 | 4467    | Up   |
| Gm9887    | 98.5308 | 0.70435 | 0.26997 | 2.60901 | 0.00908  | 0.03525  | 81.2701 | 81.452  | 62.0674 | 127.516 | 138.339 | 100.54  | Up   |
| Arf6      | 3632.94 | 0.60088 | 0.09526 | 6.30744 | 2.84E-10 | 6.96E-09 | 3010.86 | 2838.36 | 2812.13 | 4666.26 | 4352.94 | 4117.12 | Up   |
| 5830428N  | 1784.8  | 0.62564 | 0.14699 | 4.25624 | 2.08E-05 | 0.00019  | 1132.94 | 1538.96 | 1539.27 | 2109.72 | 2209.21 | 2178.7  | Up   |
| Vcpkmt    | 813.439 | 0.97279 | 0.15722 | 6.18743 | 6.12E-10 | 1.39E-08 | 546.638 | 497.336 | 603.486 | 1209.85 | 911.35  | 1111.97 | Up   |
| Dmac2l    | 963.106 | -0.3907 | 0.14545 | -2.6859 | 0.00723  | 0.02929  | 999.429 | 1204.53 | 1074.24 | 937.191 | 730.77  | 832.472 | Down |
| Cdk1l     | 262.627 | -0.8881 | 0.24107 | -3.684  | 0.00023  | 0.00157  | 304.763 | 359.347 | 359.036 | 219.784 | 126.723 | 206.107 | Down |
| Sav1      | 2002.04 | 0.37937 | 0.1372  | 2.76503 | 0.00569  | 0.02415  | 1990.15 | 1523.46 | 1703.51 | 2123.19 | 2198.64 | 2469.26 | Up   |
| Pygl      | 4996.22 | 1.09244 | 0.2075  | 5.26474 | 1.40E-07 | 2.03E-06 | 3136.64 | 3658.63 | 2774.89 | 5283.1  | 9035.35 | 6088.71 | Up   |
| Trim9     | 94.254  | -1.2644 | 0.5287  | -2.3915 | 0.01678  | 0.05812  | 122.873 | 172.487 | 104.082 | 39.3952 | 21.1205 | 105.567 | Down |
| Tmx1      | 5640.24 | 0.22096 | 0.08476 | 2.60682 | 0.00914  | 0.03543  | 5403.5  | 4910.12 | 5313.92 | 5947.64 | 6090.1  | 6176.18 | Up   |
| Gm32219   | 140.742 | 1.61746 | 0.29668 | 5.4518  | 4.99E-08 | 7.91E-07 | 88.0426 | 69.9529 | 49.6539 | 215.637 | 165.796 | 255.372 | Up   |
| Gm24474   | 59.8959 | -2.0137 | 0.54585 | -3.6891 | 0.00023  | 0.00154  | 75.4651 | 163.862 | 48.699  | 13.4773 | 32.7368 | 25.135  | Down |
| Gm40437   | 146.864 | -0.3932 | 0.19655 | -2.0003 | 0.04547  | 0.12654  | 167.378 | 164.82  | 168.059 | 137.883 | 120.387 | 122.659 | Down |
| Frm6      | 4258.79 | -0.4947 | 0.09455 | -4.7559 | 1.98E-06 | 2.28E-05 | 5024.24 | 4548.85 | 5178.33 | 3561.12 | 3718.27 | 3521.92 | Down |
| 3110056K  | 990.472 | -0.5432 | 0.18232 | -2.9795 | 0.00289  | 0.01361  | 1286.78 | 939.093 | 1298.64 | 721.554 | 747.666 | 949.098 | Down |
| Timm9     | 866.188 | -0.3905 | 0.14097 | -2.7705 | 0.0056   | 0.02382  | 853.336 | 1004.26 | 1090.48 | 697.71  | 797.299 | 754.051 | Down |
| 4930404H  | 15.3907 | -2.201  | 0.95997 | -2.2928 | 0.02186  | 0.07152  | 20.3175 | 43.1216 | 12.4135 | 0       | 8.4482  | 8.04321 | Down |
| L3hypedh  | 349.062 | -0.6738 | 0.2557  | -2.6352 | 0.00841  | 0.03311  | 460.531 | 466.672 | 359.991 | 243.628 | 367.497 | 196.053 | Down |
| Lrrc9     | 312.721 | -0.6075 | 0.23178 | -2.6209 | 0.00877  | 0.03427  | 389.903 | 328.683 | 414.419 | 260.216 | 178.468 | 304.636 | Down |
| Gm4756    | 113.881 | -0.5421 | 0.23225 | -2.3341 | 0.01959  | 0.06572  | 131.58  | 143.739 | 129.864 | 89.1576 | 82.37   | 106.572 | Down |
| Dhrs7     | 4099.53 | 0.23537 | 0.09788 | 2.4048  | 0.01618  | 0.05645  | 3961.92 | 3831.12 | 3504.42 | 4571.92 | 4549.36 | 4178.45 | Up   |
| Six1      | 821.167 | -0.8913 | 0.30344 | -2.9374 | 0.00331  | 0.0153   | 956.859 | 1250.53 | 994.033 | 579.524 | 312.584 | 833.477 | Down |
| Six4      | 966.942 | -1.0563 | 0.22993 | -4.5941 | 4.35E-06 | 4.66E-05 | 1394.17 | 1381.81 | 1142.04 | 691.489 | 413.962 | 778.18  | Down |
| Mnat1     | 1654.9  | -0.4451 | 0.10322 | -4.3124 | 1.61E-05 | 0.00015  | 2025.95 | 1795.78 | 1903.08 | 1409.93 | 1334.82 | 1459.84 | Down |
| Trmt5     | 709.121 | -0.4384 | 0.14375 | -3.0499 | 0.00229  | 0.01116  | 748.846 | 922.803 | 776.32  | 622.03  | 636.783 | 547.943 | Down |
| D830013C  | 45.26   | -1.9596 | 0.65858 | -2.9755 | 0.00292  | 0.01377  | 55.1476 | 137.989 | 22.9172 | 21.771  | 11.6163 | 22.1188 | Down |
| Gm33929   | 2.92537 | 4.00637 | 1.74029 | 2.30213 | 0.02133  | 0.07012  | 0       | 0       | 0.95488 | 5.18358 | 7.39218 | 4.0216  | Up   |
| Tmem30b   | 2479    | 0.6693  | 0.1358  | 4.92853 | 8.28E-07 | 1.04E-05 | 1873.08 | 2162.79 | 1706.38 | 3349.63 | 2748.83 | 3033.29 | Up   |
| Syne2     | 7721.19 | -0.2454 | 0.1051  | -2.3348 | 0.01955  | 0.06564  | 9040.33 | 7545.33 | 8543.34 | 7139.86 | 6748    | 7310.27 | Down |
| Akap5     | 11994.3 | -0.37   | 0.16727 | -2.2119 | 0.02697  | 0.08456  | 13295.4 | 12645.2 | 14630.7 | 10613.9 | 12641.7 | 8138.72 | Down |
| Hspa2     | 2119.28 | -0.5423 | 0.22571 | -2.4025 | 0.01628  | 0.05671  | 2363.61 | 2428.23 | 2747.2  | 2034.04 | 1105.66 | 2036.94 | Down |
| Sptb      | 374.178 | -1.9799 | 0.32052 | -6.1772 | 6.52E-10 | 1.48E-08 | 455.693 | 933.344 | 402.006 | 171.058 | 135.171 | 147.794 | Down |
| Fntb      | 1055.58 | -0.4078 | 0.13442 | -3.0336 | 0.00242  | 0.0117   | 1164.87 | 1316.65 | 1129.63 | 999.394 | 915.574 | 807.337 | Down |
| Fut8      | 3142.3  | 0.60654 | 0.10685 | 5.67668 | 1.37E-08 | 2.42E-07 | 2617.09 | 2587.3  | 2269.76 | 3703.15 | 3633.78 | 4042.72 | Up   |
| Atp6v1d   | 5239.15 | 0.21045 | 0.09057 | 2.32361 | 0.02015  | 0.06712  | 4796.87 | 5157.35 | 4618.77 | 5526.73 | 5857.77 | 5477.42 | Up   |
| Eif2s1    | 3183.96 | 0.20923 | 0.0808  | 2.58956 | 0.00961  | 0.03696  | 2963.46 | 2869.98 | 3026.98 | 3348.59 | 3475.38 | 3419.37 | Up   |
| 9230116U  | 37.3373 | 1.53192 | 0.46614 | 3.28641 | 0.00101  | 0.00565  | 14.5125 | 16.2904 | 26.7367 | 75.6803 | 48.5772 | 42.2268 | Up   |
| Arg2      | 565.987 | 0.71969 | 0.18901 | 3.80775 | 0.00014  | 0.00102  |         |         |         |         |         |         |      |

|           |         |         |         |         |          |          |         |         |         |         |         |         |      |
|-----------|---------|---------|---------|---------|----------|----------|---------|---------|---------|---------|---------|---------|------|
| Plekhd1   | 2992.8  | 1.00729 | 0.15986 | 6.30089 | 2.96E-10 | 7.21E-09 | 2032.72 | 1736.36 | 2196.23 | 3778.83 | 4772.18 | 3440.48 | Up   |
| Susd6     | 11448.6 | 0.74073 | 0.09743 | 7.60299 | 2.89E-14 | 1.33E-12 | 8842.96 | 8642.53 | 8232.05 | 13340.5 | 14077.9 | 15555.6 | Up   |
| Smoc1     | 354.42  | -1.6847 | 0.66361 | -2.5387 | 0.01113  | 0.04171  | 350.236 | 1046.42 | 225.352 | 170.021 | 140.451 | 194.042 | Down |
| Slc8a3    | 41.4084 | -1.2207 | 0.4121  | -2.9621 | 0.00306  | 0.01431  | 58.0501 | 52.7042 | 63.0223 | 18.6609 | 35.9049 | 20.108  | Down |
| Ttc9      | 4499.33 | 0.93271 | 0.10892 | 8.56363 | 1.09E-17 | 8.00E-16 | 2987.64 | 3358.7  | 2934.36 | 5460.38 | 5915.85 | 6339.05 | Up   |
| Gm49654   | 236.041 | 1.09446 | 0.24462 | 4.47405 | 7.68E-06 | 7.78E-05 | 198.338 | 117.866 | 135.593 | 293.391 | 303.079 | 367.977 | Up   |
| Map3k9    | 428.343 | 0.95343 | 0.20845 | 4.57397 | 4.79E-06 | 5.08E-05 | 350.236 | 212.733 | 312.247 | 575.377 | 596.654 | 522.808 | Up   |
| 4930423D  | 175.804 | 0.83225 | 0.22304 | 3.73143 | 0.00019  | 0.00134  | 140.288 | 101.575 | 137.503 | 198.013 | 249.222 | 228.226 | Up   |
| Pcnx      | 5709.95 | -0.2649 | 0.0834  | -3.1762 | 0.00149  | 0.00781  | 6316.82 | 5978.58 | 6402.49 | 5309.02 | 5279.07 | 4973.72 | Down |
| Rgs6      | 613.426 | -0.8007 | 0.18627 | -4.2985 | 1.72E-05 | 0.00016  | 683.056 | 923.761 | 731.44  | 366.997 | 483.66  | 491.641 | Down |
| Dpf3      | 100.115 | -0.8118 | 0.32179 | -2.5227 | 0.01165  | 0.04333  | 82.2376 | 160.987 | 139.413 | 76.717  | 74.9778 | 66.3565 | Down |
| Psen1     | 3813.43 | 0.23896 | 0.08935 | 2.67438 | 0.00749  | 0.03012  | 3717.14 | 3318.45 | 3459.54 | 4066    | 4105.83 | 4213.64 | Up   |
| Numb      | 8764.02 | -0.3622 | 0.11649 | -3.1092 | 0.00188  | 0.00945  | 9029.69 | 9257.74 | 11287.7 | 7556.62 | 7789.24 | 7663.17 | Down |
| Riox1     | 1217.29 | -0.4054 | 0.13353 | -3.036  | 0.0024   | 0.01162  | 1268.39 | 1591.67 | 1301.51 | 987.99  | 1082.43 | 1071.76 | Down |
| Acot1     | 2075.89 | -0.7036 | 0.16629 | -4.2312 | 2.32E-05 | 0.00021  | 2160.43 | 2650.54 | 2905.71 | 1825.66 | 1579.81 | 1333.16 | Down |
| Pnma1     | 148.512 | -0.6619 | 0.2332  | -2.8385 | 0.00453  | 0.01999  | 155.768 | 206.026 | 184.292 | 104.708 | 104.547 | 135.729 | Down |
| Elmsan1   | 3093.72 | -0.2594 | 0.1265  | -2.0505 | 0.04032  | 0.11526  | 3106.65 | 3123.92 | 3882.55 | 2756.63 | 2977.99 | 2714.58 | Down |
| Zfp410    | 2171.28 | -0.2062 | 0.10449 | -1.9737 | 0.04841  | 0.13314  | 2169.14 | 2356.36 | 2453.09 | 2152.22 | 1928.3  | 1968.57 | Down |
| Coq6      | 924.765 | -0.3018 | 0.1472  | -2.0499 | 0.04038  | 0.11537  | 867.849 | 1136.49 | 1058.97 | 900.906 | 794.131 | 790.245 | Down |
| Entpd5    | 4510.57 | -0.9134 | 0.19516 | -4.7724 | 1.82E-06 | 2.12E-05 | 7345.27 | 5625.94 | 4783.01 | 3209.67 | 2491.16 | 3608.38 | Down |
| Bbof1     | 654.652 | -0.7828 | 0.24387 | -3.2099 | 0.00133  | 0.00709  | 913.321 | 861.475 | 709.478 | 570.194 | 309.415 | 564.03  | Down |
| Aldh6a1   | 166.031 | -0.7143 | 0.25497 | -2.8016 | 0.00509  | 0.02203  | 260.258 | 200.276 | 158.511 | 127.516 | 110.883 | 138.745 | Down |
| Lin52     | 1415.12 | -0.4023 | 0.10563 | -3.8086 | 0.00014  | 0.00102  | 1644.75 | 1495.84 | 1693.01 | 1193.26 | 1188.03 | 1275.85 | Down |
| Abcd4     | 1467.71 | 0.74853 | 0.17651 | 4.24079 | 2.23E-05 | 0.0002   | 1249.04 | 1056    | 980.665 | 1801.81 | 2218.71 | 1500.06 | Up   |
| Npc2      | 100601  | 1.54402 | 0.14675 | 10.5216 | 6.87E-26 | 9.94E-24 | 62454.2 | 47696.4 | 43985.7 | 146937  | 157371  | 145163  | Up   |
| Ltpb2     | 4398.48 | 0.2829  | 0.10167 | 2.78257 | 0.00539  | 0.02306  | 3733.59 | 3861.78 | 4310.34 | 5093.38 | 4746.83 | 4644.95 | Up   |
| Arel1     | 1513.65 | 0.31483 | 0.12899 | 2.44071 | 0.01466  | 0.05208  | 1480.28 | 1262.03 | 1305.32 | 1257.08 | 1643.18 | 1864.01 | Up   |
| Acyp1     | 405.973 | -0.2931 | 0.13015 | -2.2517 | 0.02434  | 0.07794  | 438.278 | 451.34  | 451.66  | 364.924 | 350.6   | 379.036 | Down |
| Zc2hc1c   | 858.497 | -0.3537 | 0.15784 | -2.2411 | 0.02502  | 0.07975  | 913.321 | 1062.71 | 913.823 | 809.675 | 621.999 | 829.456 | Down |
| Tmed10    | 14553   | 0.34002 | 0.07653 | 4.44315 | 8.87E-06 | 8.82E-05 | 13043.9 | 12839.7 | 12654.1 | 16678.7 | 16551.1 | 15550.5 | Up   |
| Jdp2      | 1996.9  | -0.381  | 0.15899 | -2.3967 | 0.01654  | 0.05742  | 2232.03 | 1890.64 | 2654.57 | 1952.14 | 1605.16 | 1646.85 | Down |
| Batf      | 395.482 | 0.88358 | 0.14579 | 6.06051 | 1.36E-09 | 2.94E-08 | 254.453 | 278.853 | 300.788 | 504.881 | 489.996 | 543.922 | Up   |
| Flvcr2    | 966.975 | 0.84528 | 0.19778 | 4.27385 | 1.92E-05 | 0.00017  | 811.734 | 661.198 | 601.576 | 1285.53 | 1482.66 | 959.152 | Up   |
| Erg28     | 1926.14 | 0.21985 | 0.10159 | 2.16414 | 0.03045  | 0.0928   | 1639.91 | 1819.73 | 1879.21 | 2113.86 | 2099.38 | 2004.77 | Up   |
| Ift43     | 3507.44 | -0.4427 | 0.11975 | -3.6964 | 0.00022  | 0.0015   | 3685.21 | 4255.63 | 4183.34 | 3176.5  | 2644.29 | 3099.65 | Down |
| Gm805     | 12.6952 | -1.4357 | 0.71016 | -2.0216 | 0.04321  | 0.12175  | 16.4475 | 12.4574 | 26.7367 | 7.25701 | 4.2241  | 9.04861 | Down |
| Esrrb     | 32.6711 | -2.5286 | 0.71474 | -3.5378 | 0.0004   | 0.00257  | 43.5376 | 96.7841 | 26.7367 | 18.6609 | 5.28013 | 5.027   | Down |
| Vash1     | 122.373 | 0.6294  | 0.25734 | 2.44574 | 0.01446  | 0.05152  | 119.97  | 82.4102 | 85.9395 | 168.985 | 135.171 | 141.762 | Up   |
| Isrm2     | 27.4746 | -2.3688 | 0.52132 | -4.5438 | 5.52E-06 | 5.78E-05 | 39.6676 | 43.1216 | 55.3832 | 9.33044 | 5.28013 | 12.0648 | Down |
| Sptlc2    | 13381.2 | 0.81039 | 0.10325 | 7.84866 | 4.21E-15 | 2.15E-13 | 10345.5 | 9068    | 9742.67 | 16292   | 18517.4 | 16321.7 | Up   |
| Oog1      | 34.3756 | -2.8764 | 0.52432 | -5.4859 | 4.11E-08 | 6.61E-07 | 68.6926 | 58.4538 | 54.4283 | 3.11015 | 9.50423 | 12.0648 | Down |
| Gm3742    | 4.00981 | -5.3998 | 1.78452 | -3.0259 | 0.00248  | 0.01195  | 13.545  | 2.87478 | 7.63906 | 0       | 0       | 0       | Down |
| Gm21038   | 3.05454 | -3.9602 | 1.70559 | -2.3219 | 0.02024  | 0.06736  | 4.83751 | 5.74955 | 6.68418 | 0       | 1.05603 | 0       | Down |
| Gm2042    | 10.7598 | -4.9294 | 1.30271 | -3.784  | 0.00015  | 0.00111  | 31.9275 | 18.2069 | 12.4135 | 0       | 0       | 2.0108  | Down |
| Gm2099    | 19.9997 | -1.9422 | 0.60977 | -3.1851 | 0.00145  | 0.00761  | 44.5051 | 31.6225 | 19.0977 | 6.2203  | 9.50423 | 9.04861 | Down |
| Gm10436   | 26.2046 | -2.9795 | 0.72741 | -4.0961 | 4.20E-05 | 0.00035  | 64.8226 | 45.9964 | 28.6465 | 2.07343 | 12.6723 | 3.0162  | Down |
| Gm47684   | 3.20794 | -4.0355 | 1.7844  | -2.2615 | 0.02373  | 0.07641  | 1.935   | 6.70781 | 9.54883 | 0       | 1.05603 | 0       | Down |
| Dio2      | 93.0178 | -2.0835 | 0.66265 | -3.1442 | 0.00167  | 0.00855  | 46.4401 | 338.265 | 66.8418 | 29.028  | 44.3531 | 33.1782 | Down |
| Tshr      | 64.2642 | -2.6321 | 0.49198 | -5.35   | 8.80E-08 | 1.31E-06 | 78.3676 | 184.944 | 68.7516 | 17.6242 | 14.7844 | 21.1134 | Down |
| Sel1l     | 9089.2  | 0.38386 | 0.07074 | 5.42651 | 5.75E-08 | 9.00E-07 | 7761.3  | 7926.72 | 7973.27 | 10154.6 | 10318.4 | 10400.9 | Up   |
| Galc      | 2362.6  | 0.7646  | 0.13251 | 5.7701  | 7.92E-09 | 1.47E-07 | 1929.2  | 1704.74 | 1618.53 | 2589.72 | 3112.11 | 3221.3  | Up   |
| Gm47567   | 2.58379 | 4.87057 | 1.91275 | 2.54637 | 0.01088  | 0.041    | 0       | 0       | 0       | 7.25701 | 4.2241  | 4.0216  | Up   |
| Zc3h14    | 4220.45 | 0.28106 | 0.09624 | 2.92029 | 0.0035   | 0.01606  | 4010.29 | 3681.63 | 3740.28 | 4584.36 | 4365.61 | 4940.54 | Up   |
| Eml5      | 591.707 | -0.4803 | 0.1877  | -2.5591 | 0.01049  | 0.0398   | 617.266 | 650.658 | 800.192 | 498.66  | 402.346 | 581.122 | Down |
| Efcab11   | 183.722 | -0.6788 | 0.25741 | -2.6372 | 0.00836  | 0.03298  | 202.208 | 254.897 | 221.533 | 157.581 | 98.2104 | 167.902 | Down |
| Tdp1      | 731.275 | -0.3402 | 0.14162 | -2.4026 | 0.01628  | 0.05671  | 803.026 | 789.605 | 858.44  | 655.204 | 723.377 | 557.997 | Down |
| Kcnk13    | 340.873 | 0.91691 | 0.27815 | 3.29645 | 0.00098  | 0.00548  | 272.835 | 218.483 | 216.758 | 386.695 | 636.783 | 313.685 | Up   |
| Calm1     | 59505.7 | 0.21607 | 0.08376 | 2.5796  | 0.00989  | 0.03787  | 54613.5 | 52443.6 | 58117   | 66092.7 | 63794.5 | 61972.9 | Up   |
| Ttc7b     | 1407.73 | 0.24743 | 0.11896 | 2.07994 | 0.03753  | 0.10902  | 1281.94 | 1271.61 | 1308.19 | 1431.7  | 1720.27 | 1432.7  | Up   |
| Dglucy    | 1042.96 | 0.49923 | 0.15614 | 3.19741 | 0.00139  | 0.00734  | 949.119 | 944.843 | 698.974 | 1302.12 | 1154.24 | 1208.49 | Up   |
| Ppp4r3a   | 1127.74 | 0.37864 | 0.17403 | 2.17564 | 0.02958  | 0.09087  | 1016.84 | 828.894 | 1096.21 | 1160.09 | 1134.17 | 1530.22 | Up   |
| Gm18795   | 12.551  | -3.2408 | 1.23337 | -2.6276 | 0.0086   | 0.03373  | 9.67501 | 53.6625 | 4.77441 | 5.18358 | 0       | 2.0108  | Down |
| Catsperb  | 263.816 | 1.77207 | 0.22872 | 7.74775 | 9.35E-15 | 4.58E-13 | 147.06  | 114.033 | 97.3981 | 394.989 | 481.548 | 347.869 | Up   |
| Tc2n      | 2986.07 | 2.05653 | 0.14574 | 14.1109 | 3.26E-45 | 2.13E-42 | 1352.57 | 1057.92 | 1061.83 | 4465.14 | 5418.47 | 4560.5  | Up   |
| Fbln5     | 8197.58 | -0.2098 | 0.10687 | -1.9629 | 0.04966  | 0.13608  | 8246.01 | 9822.15 | 8309.39 | 7337.87 | 7675.19 | 7794.87 | Down |
| Cpsf2     | 2221.57 | 0.32527 | 0.08903 | 3.65327 | 0.00026  | 0.00174  | 2047.23 | 1924.18 | 1945.1  | 2419.69 | 2567.2  | 2426.03 | Up   |
| Slc24a4   | 1362.61 | 1.10901 | 0.15077 | 7.35587 | 1.90E-13 | 7.68E-12 | 947.184 | 898.847 | 743.854 | 1855.72 | 1635.78 | 2094.25 | Up   |
| Lgmn      | 8144.33 | 0.94079 | 0.13259 | 7.09533 | 1.29E-12 | 4.58E-11 | 6510.32 | 5213.89 | 5013.14 | 11199.6 | 11043.9 | 9885.1  | Up   |
| Chga      | 14.067  | -2.6753 | 0.78595 | -3.4039 | 0.00066  | 0.00395  | 22.2525 | 18.2069 | 32.466  | 2.07343 | 7.39218 | 2.0108  | Down |
| Unc79     | 446.714 | -2.1006 | 0.3839  | -5.4717 | 4.46E-08 | 7.14E-07 | 406.351 | 1259.15 | 507.998 | 134.773 | 189.029 | 182.983 | Down |
| Asb2      | 671.084 | -2.13   | 0.61836 | -3.4447 | 0.00057  | 0.00347  | 508.906 | 2067.92 | 700.884 | 220.82  | 254.502 | 273.469 | Down |
| Otub2     | 669.248 | -0.5346 | 0.13492 | -3.962  | 7.43E-05 | 0.00059  | 861.076 | 774.273 | 740.034 | 582.634 | 561.805 | 495.663 | Down |
| Ifi27     | 7393.14 | 0.24602 | 0.10616 | 2.31751 | 0.02048  | 0.06801  | 6639.96 | 7318.22 | 6334.69 | 8684.57 | 7608.66 | 7772.75 | Up   |
| Ppp4r4    | 1220.05 | -0.7773 | 0.14479 | -5.3686 | 7.93E-08 | 1.20E-06 | 1300.32 | 1538.01 | 1784.68 | 897.796 | 898.678 | 900.839 | Down |
| Serpina10 | 97.598  | 1.14593 | 0.45039 | 2.54434 | 0.01095  | 0.04118  | 53.2126 | 53.6625 | 75.4357 | 146.177 | 57.0254 | 200.075 | Up   |
| Serpina16 | 5.48897 | -2.7897 | 1.30182 | -2.1429 | 0.03212  | 0.09656  | 6.77251 | 3.83303 | 18.1428 | 2.07343 | 2.11205 | 0       | Down |
| Serpina11 | 8.09968 | 3.54364 | 1.25632 | 2.82066 | 0.00479  | 0.02093  | 1.935   | 0       | 1.90977 | 10.3672 | 4.2241  | 30.162  | Up   |
| Gm285     |         |         |         |         |          |          |         |         |         |         |         |         |      |

|           |         |         |         |         |          |          |         |         |         |         |         |         |      |
|-----------|---------|---------|---------|---------|----------|----------|---------|---------|---------|---------|---------|---------|------|
| Serpina3i | 108.613 | 1.21288 | 0.41179 | 2.94539 | 0.00323  | 0.01499  | 28.0575 | 76.6607 | 91.6688 | 134.773 | 142.563 | 177.956 | Up   |
| Serpina3n | 8286.8  | 0.92308 | 0.1311  | 7.04096 | 1.91E-12 | 6.57E-11 | 6276.18 | 5733.26 | 5158.28 | 11576   | 11585.7 | 9391.45 | Up   |
| Clnn      | 2051.01 | 1.1396  | 0.12343 | 9.23287 | 2.63E-20 | 2.37E-18 | 1249.04 | 1448.89 | 1143.95 | 2759.74 | 2743.55 | 2960.91 | Up   |
| Gm28875   | 372.493 | -0.8289 | 0.18861 | -4.3948 | 1.11E-05 | 0.00011  | 389.903 | 563.456 | 476.487 | 264.363 | 290.407 | 250.345 | Down |
| Atg2b     | 1808.75 | 0.23894 | 0.08991 | 2.6575  | 0.00787  | 0.03138  | 1691.19 | 1666.41 | 1620.44 | 1892.01 | 1951.53 | 2030.91 | Up   |
| Setd3     | 8397.94 | 0.21447 | 0.08267 | 2.59427 | 0.00948  | 0.03654  | 7779.68 | 7636.36 | 7908.34 | 8871.18 | 9529.57 | 8662.53 | Up   |
| Ccdc85c   | 919.469 | -0.33   | 0.11279 | -2.9253 | 0.00344  | 0.01584  | 985.884 | 1082.83 | 1003.58 | 800.345 | 866.997 | 777.175 | Down |
| Cyp46a1   | 85.8076 | -0.6463 | 0.26959 | -2.3972 | 0.01652  | 0.05737  | 110.295 | 103.492 | 100.263 | 74.6435 | 72.8658 | 53.2862 | Down |
| Evl       | 382.041 | 1.25526 | 0.23989 | 5.23262 | 1.67E-07 | 2.39E-06 | 291.218 | 199.318 | 186.202 | 502.807 | 665.296 | 447.403 | Up   |
| Degs2     | 107.742 | 0.79813 | 0.358   | 2.22942 | 0.02579  | 0.0816   | 59.9851 | 108.283 | 67.7967 | 164.838 | 88.7061 | 156.843 | Up   |
| Gm34220   | 92.8478 | -0.8478 | 0.24618 | -3.4437 | 0.00057  | 0.00348  | 122.873 | 114.991 | 120.315 | 62.203  | 62.3055 | 74.3997 | Down |
| Slc25a47  | 416.689 | -0.7592 | 0.21011 | -3.6133 | 0.0003   | 0.002    | 449.888 | 505.961 | 615.899 | 331.749 | 239.718 | 356.917 | Down |
| Wdr25     | 345.389 | -0.5094 | 0.1731  | -2.9431 | 0.00325  | 0.01506  | 388.936 | 405.343 | 423.013 | 331.749 | 240.774 | 282.518 | Down |
| Meg3      | 1280.85 | 1.26134 | 0.52614 | 2.39734 | 0.01651  | 0.05736  | 724.659 | 850.934 | 686.561 | 1221.25 | 3190.25 | 1011.43 | Up   |
| Rian      | 838.814 | 0.86921 | 0.33935 | 2.56138 | 0.01043  | 0.03958  | 520.516 | 649.699 | 610.17  | 757.839 | 1830.09 | 664.57  | Up   |
| Dio3os    | 30.6562 | -2.1349 | 0.45743 | -4.6672 | 3.05E-06 | 3.39E-05 | 52.2451 | 43.1216 | 54.4283 | 13.4773 | 11.6163 | 9.04861 | Down |
| B930059U  | 26.0669 | -0.9767 | 0.44977 | -2.1716 | 0.02988  | 0.0916   | 34.8301 | 30.6643 | 38.1953 | 20.7343 | 16.8964 | 15.081  | Down |
| Gm35558   | 72.2531 | -0.8753 | 0.28488 | -3.0725 | 0.00212  | 0.01047  | 107.393 | 89.1181 | 84.0297 | 52.8725 | 53.8573 | 46.2484 | Down |
| 1700001K  | 151.28  | -0.4202 | 0.19546 | -2.1495 | 0.03159  | 0.09538  | 174.15  | 165.779 | 179.518 | 139.957 | 124.611 | 123.664 | Down |
| Hsp90aa1  | 31981.6 | -0.3834 | 0.19445 | -1.9719 | 0.04862  | 0.13354  | 30938.8 | 32275.1 | 45406.6 | 26354.4 | 22989.7 | 33925.2 | Down |
| Cinp      | 1371.84 | -0.2524 | 0.10181 | -2.479  | 0.01318  | 0.04786  | 1443.51 | 1427.81 | 1603.25 | 1257.54 | 1248.22 | 1250.72 | Down |
| Ankrd9    | 380.17  | -1.1725 | 0.17469 | -6.712  | 1.92E-11 | 5.76E-10 | 545.671 | 565.373 | 468.847 | 262.289 | 240.774 | 198.064 | Down |
| Gm48630   | 3.6799  | -5.2762 | 1.90768 | -2.7658 | 0.00568  | 0.02411  | 4.83751 | 15.3321 | 1.90977 | 0       | 0       | 0       | Down |
| Traf3     | 2034.31 | 0.4634  | 0.11245 | 4.12105 | 3.77E-05 | 0.00032  | 1729.89 | 1669.29 | 1732.16 | 2181.25 | 2265.17 | 2628.12 | Up   |
| Cdc42bpt  | 5160.38 | 0.35337 | 0.11492 | 3.07487 | 0.00211  | 0.0104   | 4624.66 | 3978.69 | 4991.17 | 5758.96 | 5986.61 | 5622.2  | Up   |
| Lbhd2     | 7.65892 | 4.52125 | 1.40463 | 3.21881 | 0.00129  | 0.0069   | 0       | 1.91652 | 0       | 16.5875 | 6.33615 | 21.1134 | Up   |
| Tnfrap2   | 583.333 | 2.11144 | 0.27285 | 7.73858 | 1.01E-14 | 4.87E-13 | 308.633 | 174.403 | 174.744 | 171.986 | 1217.6  | 862.634 | Up   |
| Bag5      | 2764.79 | -0.2672 | 0.13468 | -1.9837 | 0.04728  | 0.13064  | 3043.76 | 2584.42 | 3431.85 | 2525.44 | 2650.62 | 2352.64 | Down |
| Apopt1    | 1377.04 | -0.2453 | 0.09811 | -2.5001 | 0.01241  | 0.04563  | 1488.02 | 1544.71 | 1448.56 | 1269.98 | 1310.53 | 1200.45 | Down |
| Zfyve21   | 3252.67 | -0.3355 | 0.16078 | -2.0863 | 0.03695  | 0.10778  | 4145.74 | 3267.66 | 3473.86 | 3393.17 | 2819.59 | 2415.98 | Down |
| Atp5mpl   | 1209.85 | -0.4487 | 0.12341 | -3.6361 | 0.00028  | 0.00185  | 1231.63 | 1516.92 | 1440.92 | 1058.49 | 992.664 | 1018.47 | Down |
| Aspg      | 272.404 | -2.2545 | 0.38076 | -5.9212 | 3.20E-09 | 6.44E-08 | 363.781 | 595.079 | 392.457 | 147.214 | 45.4091 | 90.4861 | Down |
| A530016L  | 58.3539 | -9.2633 | 1.3811  | -6.7072 | 1.98E-11 | 5.94E-10 | 54.1801 | 251.064 | 44.8795 | 0       | 0       | 0       | Down |
| Tmem179   | 28.9791 | -5.358  | 1.25864 | -4.257  | 2.07E-05 | 0.00019  | 17.415  | 137.989 | 14.3232 | 4.14686 | 0       | 0       | Down |
| Adssl1    | 1610.83 | -0.352  | 0.16748 | -2.1019 | 0.03556  | 0.10453  | 1767.63 | 2204.95 | 1446.65 | 1364.32 | 1404.51 | 1476.93 | Down |
| Siva1     | 1103.13 | -0.5365 | 0.10967 | -4.8918 | 9.99E-07 | 1.23E-05 | 1222.92 | 1335.81 | 1358.8  | 938.228 | 913.462 | 849.564 | Down |
| Akt1      | 11083   | 0.22182 | 0.10147 | 2.18603 | 0.02881  | 0.08918  | 10593.2 | 9581.63 | 10522.8 | 11907.7 | 12860.3 | 11032.3 | Up   |
| Zbtb42    | 1425.32 | 0.39772 | 0.11406 | 3.48689 | 0.00049  | 0.00304  | 1209.38 | 1135.54 | 1345.43 | 1584.1  | 1570.31 | 1707.17 | Up   |
| Jag2      | 3014.31 | -0.5738 | 0.17005 | -3.374  | 0.00074  | 0.00433  | 2822.2  | 3634.68 | 4360.95 | 2501.6  | 2219.77 | 2546.68 | Down |
| Gm26583   | 63.1794 | -1.8808 | 0.4923  | -3.8204 | 0.00013  | 0.00098  | 67.7251 | 107.325 | 123.18  | 13.4773 | 21.1205 | 46.2484 | Down |
| Crip2     | 32640.3 | -0.4529 | 0.12321 | -3.6759 | 0.00024  | 0.00161  | 35269.3 | 36845   | 41051.4 | 29800.4 | 28940.4 | 23935.6 | Down |
| Igha      | 8713.37 | 2.50232 | 0.54896 | 4.55829 | 5.16E-06 | 5.44E-05 | 1250.01 | 4164.59 | 2428.27 | 9014.24 | 16648.2 | 18774.9 | Up   |
| Ighg2b    | 548.275 | 1.83272 | 0.61927 | 2.95948 | 0.00308  | 0.01441  | 86.1076 | 257.772 | 377.179 | 1134.17 | 812.084 | 622.343 | Up   |
| Ighg1     | 317.537 | 3.79057 | 0.95535 | 3.96771 | 7.26E-05 | 0.00057  | 16.4475 | 63.2451 | 48.699  | 1308.34 | 230.214 | 238.28  | Up   |
| Ighg3     | 97.7729 | 1.45025 | 0.64997 | 2.23126 | 0.02566  | 0.08126  | 112.23  | 21.0817 | 23.8721 | 228.077 | 132.003 | 69.3727 | Up   |
| Ighm      | 16146.3 | 1.14248 | 0.52502 | 2.17606 | 0.02955  | 0.09081  | 16912.9 | 7475.38 | 5814.28 | 25800.7 | 16964   | 23910.4 | Up   |
| Ighv2-2   | 75.7062 | 4.29075 | 0.86201 | 4.97761 | 6.44E-07 | 8.32E-06 | 7.74001 | 2.87478 | 11.4586 | 183.499 | 237.606 | 11.0594 | Up   |
| Ighv5-4   | 19.8096 | 2.46115 | 0.92746 | 2.65364 | 0.00796  | 0.03168  | 9.67501 | 2.87478 | 5.7293  | 4.14686 | 40.129  | 56.3024 | Up   |
| Ighv5-6   | 13.0981 | 2.53776 | 0.97989 | 2.58983 | 0.0096   | 0.03694  | 4.83751 | 4.79129 | 1.90977 | 12.4406 | 48.5772 | 6.03241 | Up   |
| Ighv5-9   | 13.5224 | 3.70638 | 1.10756 | 3.34643 | 0.00082  | 0.0047   | 2.9025  | 1.91652 | 0.95488 | 27.9913 | 44.3531 | 3.0162  | Up   |
| Ighv5-9-1 | 23.5164 | 1.96685 | 0.87584 | 2.24567 | 0.02472  | 0.07895  | 3.87001 | 6.70781 | 18.1428 | 8.29373 | 73.9218 | 30.162  | Up   |
| Ighv2-6-8 | 12.1245 | 4.60494 | 1.64472 | 2.79983 | 0.00511  | 0.02212  | 0       | 0.95826 | 1.90977 | 0       | 10.5603 | 59.3187 | Up   |
| Ighv5-16  | 33.0551 | 4.45311 | 1.13236 | 3.93258 | 8.40E-05 | 0.00065  | 5.80501 | 0       | 2.86465 | 4.14686 | 52.8013 | 132.713 | Up   |
| Ighv4-1   | 74.9754 | 4.72725 | 1.45566 | 3.24749 | 0.00116  | 0.00633  | 10.6425 | 0       | 5.7293  | 29.028  | 89.7622 | 314.69  | Up   |
| Ighv3-1   | 8.38416 | 4.6594  | 1.74015 | 2.67758 | 0.00742  | 0.02989  | 0       | 0.95826 | 0.95488 | 1.03672 | 2.11205 | 45.243  | Up   |
| Ighv11-2  | 34.5939 | 1.73456 | 0.72658 | 2.3873  | 0.01697  | 0.05867  | 14.5125 | 7.66607 | 25.7818 | 99.5247 | 15.8404 | 44.2376 | Up   |
| Ighv14-3  | 17.3274 | 2.87405 | 0.94327 | 3.04691 | 0.00231  | 0.01124  | 2.9025  | 8.62433 | 0.95488 | 52.8725 | 8.4482  | 30.162  | Up   |
| Ighv9-1   | 26.0307 | 3.10047 | 1.13267 | 2.73731 | 0.00619  | 0.02585  | 3.87001 | 3.83303 | 8.59395 | 3.11015 | 126.723 | 10.054  | Up   |
| Ighv9-3   | 46.6578 | 1.97682 | 0.8057  | 2.45355 | 0.01415  | 0.05071  | 25.155  | 14.3739 | 17.1879 | 177.278 | 14.7844 | 31.1674 | Up   |
| Ighv14-4  | 31.8701 | 4.0947  | 0.70893 | 5.77592 | 7.65E-09 | 1.42E-07 | 4.83751 | 2.87478 | 2.86465 | 93.3044 | 60.1934 | 27.1458 | Up   |
| Ighv3-5   | 7.4254  | 3.04421 | 1.22674 | 2.48155 | 0.01308  | 0.04756  | 2.9025  | 1.91652 | 0       | 10.3672 | 25.3446 | 4.0216  | Up   |
| Ighv3-6   | 66.0478 | 2.21752 | 0.47184 | 4.69971 | 2.61E-06 | 2.93E-05 | 28.0575 | 26.8312 | 15.2781 | 126.479 | 53.8573 | 145.783 | Up   |
| Ighv9-4   | 8.60027 | 3.28342 | 1.32276 | 2.48225 | 0.01306  | 0.04751  | 2.9025  | 0.95826 | 0.95488 | 1.03672 | 10.5603 | 35.189  | Up   |
| Ighv12-3  | 16.2219 | 1.60887 | 0.59848 | 2.68828 | 0.00718  | 0.02911  | 11.61   | 5.74955 | 6.68418 | 22.8077 | 25.3446 | 25.135  | Up   |
| Ighv6-3   | 104.818 | 3.90179 | 0.62369 | 6.25598 | 3.95E-10 | 9.35E-09 | 21.285  | 5.74955 | 12.4135 | 293.391 | 240.774 | 55.297  | Up   |
| Ighv6-6   | 198.557 | 3.83937 | 0.54862 | 6.99821 | 2.59E-12 | 8.70E-11 | 24.1875 | 39.2886 | 14.3232 | 678.012 | 129.891 | 305.642 | Up   |
| Ighv1-7   | 10.0098 | 2.39498 | 0.93251 | 2.56832 | 0.01022  | 0.03892  | 1.935   | 5.74955 | 1.90977 | 27.9913 | 7.39218 | 15.081  | Up   |
| Ighv1-9   | 51.9533 | 3.51753 | 0.65427 | 5.37627 | 7.60E-08 | 1.15E-06 | 15.48   | 5.74955 | 3.81953 | 89.1576 | 156.292 | 41.2214 | Up   |
| Ighv1-12  | 40.5041 | 4.20928 | 0.64832 | 6.49256 | 8.44E-11 | 2.25E-09 | 0       | 7.66607 | 4.77441 | 57.0194 | 97.1543 | 76.4105 | Up   |
| Ighv1-36  | 3.16486 | 5.16207 | 2.57764 | 2.00264 | 0.04522  | 0.12605  | 0       | 0       | 0       | 1.03672 | 17.9524 | 0       | Up   |
| Ighv1-47  | 10.0976 | 2.24071 | 1.05211 | 2.12973 | 0.03319  | 0.09905  | 4.83751 | 2.87478 | 2.86465 | 31.1015 | 16.8964 | 2.0108  | Up   |
| Ighv1-50  | 13.9239 | 2.26804 | 0.93711 | 2.42024 | 0.01551  | 0.05448  | 1.935   | 5.74955 | 6.68418 | 8.29373 | 11.6163 | 49.2646 | Up   |
| Ighv1-52  | 116.864 | 3.99495 | 0.67659 | 5.90453 | 3.54E-09 | 7.08E-08 | 23.22   | 14.3739 | 3.81953 | 99.5247 | 109.827 | 450.42  | Up   |
| Ighv1-55  | 113.467 | 2.81794 | 0.43926 | 6.41516 | 1.41E-10 | 3.65E-09 | 36.7651 | 12.4574 | 35.3307 | 257.106 | 216.485 | 122.659 | Up   |
| Ighv1-56  | 9.81116 | -3.3704 | 1.46018 | -2.3082 | 0.02099  | 0.06925  | 1.935   | 46.9547 | 4.77441 | 4.14686 | 1.05603 | 0       | Down |
| Ighv1-58  | 14.1012 | 4.05855 | 1.47087 | 2.75928 | 0.00579  | 0.02451  | 0       | 2.87478 | 1.90977 | 74.6435 | 3.16808 | 2.0108  | Up   |
| Ighv1-61  | 4.09473 | 2.42931 | 1.2178  | 1.99484 | 0.04606  | 0.12796  | 1.935   | 0.95826 |         |         |         |         |      |

|           |         |         |         |         |          |          |         |         |         |         |         |         |      |
|-----------|---------|---------|---------|---------|----------|----------|---------|---------|---------|---------|---------|---------|------|
| Ighv1-81  | 25.7695 | 2.37695 | 0.56935 | 4.17486 | 2.98E-05 | 0.00026  | 7.74001 | 12.4574 | 4.77441 | 31.1015 | 42.241  | 56.3024 | Up   |
| Ighv1-82  | 76.5456 | 2.56369 | 0.6021  | 4.25791 | 2.06E-05 | 0.00019  | 42.5701 | 14.3739 | 9.54883 | 82.9373 | 87.6501 | 222.194 | Up   |
| Gm9260    | 123.466 | -0.8642 | 0.38914 | -2.2208 | 0.02636  | 0.08308  | 76.4326 | 190.693 | 211.029 | 85.0107 | 77.0899 | 100.54  | Down |
| Vipr2     | 1420.9  | -0.5078 | 0.16467 | -3.0836 | 0.00205  | 0.01015  | 1553.81 | 1674.08 | 1777.04 | 1274.12 | 1327.42 | 918.936 | Down |
| D430020J  | 39.9123 | 0.92544 | 0.36696 | 2.52192 | 0.01167  | 0.0434   | 29.9925 | 27.7895 | 24.827  | 60.1295 | 46.4651 | 50.27   | Up   |
| Ncapg2    | 354.891 | 0.60379 | 0.14839 | 4.06906 | 4.72E-05 | 0.00039  | 303.795 | 257.772 | 283.6   | 420.907 | 411.85  | 451.425 | Up   |
| Ptprn2    | 209.479 | -0.8472 | 0.35748 | -2.37   | 0.01779  | 0.06088  | 205.11  | 367.013 | 235.856 | 139.957 | 89.7622 | 219.177 | Down |
| Rapgef5   | 11137.2 | -0.4756 | 0.13584 | -3.5013 | 0.00046  | 0.0029   | 11119.5 | 12555.1 | 15195.1 | 9046.38 | 9067.03 | 9839.86 | Down |
| Dnah11    | 1357.64 | -0.5328 | 0.21869 | -2.4363 | 0.01484  | 0.05262  | 1492.85 | 1623.29 | 1700.65 | 1132.09 | 758.226 | 1438.73 | Down |
| Gm49602   | 484.624 | -0.5373 | 0.18486 | -2.9067 | 0.00365  | 0.01664  | 581.468 | 480.088 | 659.824 | 434.384 | 418.186 | 333.793 | Down |
| Ncoa4-ps  | 233.313 | 0.89292 | 0.2088  | 4.27645 | 1.90E-05 | 0.00017  | 192.533 | 132.24  | 165.195 | 301.684 | 334.76  | 273.469 | Up   |
| Macc1     | 970.376 | 0.37472 | 0.18185 | 2.06055 | 0.03935  | 0.11305  | 990.722 | 713.903 | 830.748 | 1038.79 | 944.087 | 1304    | Up   |
| Gm17177   | 7.237   | 6.35646 | 1.52368 | 4.17179 | 3.02E-05 | 0.00026  | 0       | 0       | 0       | 22.8077 | 10.5603 | 10.054  | Up   |
| Gm48530   | 16.3127 | -1.4839 | 0.61134 | -2.4272 | 0.01521  | 0.05369  | 31.9275 | 23.9565 | 16.233  | 7.25701 | 8.4482  | 10.054  | Down |
| Gm16505   | 52.9847 | -1.8328 | 0.52076 | -3.5194 | 0.00043  | 0.00273  | 119.003 | 62.2868 | 66.8418 | 27.9913 | 32.7368 | 9.04861 | Down |
| Gdi2      | 20276.7 | 0.29693 | 0.07601 | 3.9063  | 9.37E-05 | 0.00072  | 18934   | 18219.4 | 17439   | 22304.9 | 22286.4 | 22476.7 | Up   |
| Akr1c13   | 613.73  | 0.51732 | 0.18911 | 2.73552 | 0.00623  | 0.02597  | 514.711 | 591.246 | 408.69  | 823.152 | 615.663 | 728.916 | Up   |
| Akr1c19   | 841.83  | 2.25807 | 0.31342 | 7.20465 | 5.82E-13 | 2.18E-11 | 431.506 | 198.36  | 243.495 | 1311.45 | 1882.89 | 983.282 | Up   |
| Akr1c12   | 121.125 | 1.54925 | 0.44515 | 3.48029 | 0.0005   | 0.00311  | 33.8626 | 100.617 | 50.6088 | 221.857 | 106.659 | 213.145 | Up   |
| Gm40660   | 7.63114 | -2.1861 | 0.95544 | -2.288  | 0.02213  | 0.07224  | 21.285  | 8.62433 | 7.63906 | 3.11015 | 2.11205 | 3.0162  | Down |
| Gm47507   | 34.6318 | 1.89039 | 0.43123 | 4.38369 | 1.17E-05 | 0.00011  | 13.545  | 15.3321 | 15.2781 | 44.5788 | 50.6892 | 68.3673 | Up   |
| Gm46401   | 26.5908 | 2.3054  | 0.54602 | 4.22216 | 2.42E-05 | 0.00022  | 4.83751 | 11.4991 | 10.5037 | 34.2116 | 41.185  | 57.3078 | Up   |
| Idi1      | 1948.4  | 1.44997 | 0.14479 | 10.0141 | 1.32E-23 | 1.56E-21 | 1119.4  | 1151.83 | 861.304 | 2628.07 | 2934.69 | 2995.09 | Up   |
| Gtpbp4    | 2879.53 | -0.2582 | 0.10981 | -2.3512 | 0.01871  | 0.06343  | 3358.2  | 2820.16 | 3231.32 | 2638.44 | 2495.39 | 2733.68 | Down |
| Gm36264   | 31.9901 | -1.4432 | 0.47484 | -3.0392 | 0.00237  | 0.01151  | 60.9526 | 38.3303 | 41.06   | 23.8445 | 12.6723 | 15.081  | Down |
| Chrm3     | 325.808 | -0.8883 | 0.33284 | -2.6687 | 0.00761  | 0.03054  | 464.401 | 528.001 | 276.916 | 244.665 | 136.227 | 304.636 | Down |
| Ryr2      | 1883.47 | -3.765  | 0.63354 | -5.9428 | 2.80E-09 | 5.69E-08 | 2467.13 | 6306.3  | 1753.16 | 218.747 | 178.468 | 377.025 | Down |
| Mtr       | 1764.2  | -0.5179 | 0.16087 | -3.2193 | 0.00128  | 0.00689  | 1875.99 | 2543.22 | 1813.32 | 1354.99 | 1438.31 | 1559.38 | Down |
| Actn2     | 2166.53 | -5.3324 | 1.11143 | -4.7978 | 1.60E-06 | 1.89E-05 | 2279.43 | 8023.5  | 2381.48 | 81.9006 | 12.6723 | 220.183 | Down |
| Heatr1    | 2810.75 | 0.78562 | 0.21696 | 3.62095 | 0.00029  | 0.00195  | 1802.46 | 2314.19 | 2074.96 | 2974.34 | 2835.43 | 4863.12 | Up   |
| Lgals8    | 3717.78 | 0.71387 | 0.18847 | 3.78767 | 0.00015  | 0.0011   | 3369.81 | 2422.48 | 2656.48 | 4533.56 | 5626.5  | 3697.86 | Up   |
| Gm30239   | 2.71533 | -4.8379 | 1.97458 | -2.4501 | 0.01428  | 0.05108  | 1.935   | 9.58259 | 4.77441 | 0       | 0       | 0       | Down |
| Nid1      | 4928.83 | -0.3759 | 0.10193 | -3.6875 | 0.00023  | 0.00155  | 5055.2  | 5638.39 | 6008.12 | 4174.85 | 4398.35 | 4298.09 | Down |
| Lyst      | 2788.84 | 0.6875  | 0.19462 | 3.53259 | 0.00041  | 0.00262  | 2446.81 | 1951.97 | 2010.98 | 3301.94 | 4375.11 | 2646.22 | Up   |
| Gng4      | 69.4027 | -1.3148 | 0.37939 | -3.4654 | 0.00053  | 0.00325  | 137.385 | 70.9111 | 88.8041 | 40.4319 | 30.6247 | 48.2592 | Down |
| Gli3      | 256.015 | -0.7788 | 0.18911 | -4.118  | 3.82E-05 | 0.00032  | 311.535 | 280.77  | 378.134 | 176.242 | 195.365 | 194.042 | Down |
| Gm5628    | 75.2789 | -1.2523 | 0.31622 | -3.9603 | 7.49E-05 | 0.00059  | 122.873 | 106.367 | 88.8041 | 49.7624 | 50.6892 | 33.1782 | Down |
| Vdac3-ps  | 1002.87 | -0.434  | 0.1537  | -2.8238 | 0.00475  | 0.02078  | 964.599 | 1334.85 | 1158.27 | 914.383 | 823.7   | 821.413 | Down |
| Vps41     | 4052.42 | 0.22142 | 0.0895  | 2.47399 | 0.01336  | 0.04842  | 3823.57 | 3866.57 | 3535.93 | 4231.87 | 4550.41 | 4306.13 | Up   |
| Amph      | 1183.54 | -1.1515 | 0.18313 | -6.2878 | 3.22E-10 | 7.79E-09 | 1229.69 | 1716.24 | 1950.83 | 755.766 | 754.002 | 694.732 | Down |
| Stard3nl  | 4653.16 | 0.33277 | 0.09974 | 3.33628 | 0.00085  | 0.00485  | 4036.42 | 4094.64 | 4225.36 | 5438.61 | 5422.69 | 4701.25 | Up   |
| Epdrl     | 1206.47 | -0.4188 | 0.12773 | -3.2791 | 0.00104  | 0.00576  | 1429    | 1488.18 | 1224.16 | 1015.98 | 971.543 | 1109.96 | Down |
| Sfrp4     | 96.3052 | -1.5197 | 0.40708 | -3.7332 | 0.00019  | 0.00133  | 70.6276 | 195.485 | 162.33  | 45.6155 | 46.4651 | 57.3078 | Down |
| Aoah      | 182.234 | 0.95838 | 0.39974 | 2.39753 | 0.01651  | 0.05734  | 109.328 | 176.32  | 85.9395 | 187.646 | 153.124 | 381.047 | Up   |
| Gpx6      | 27.8254 | 8.29951 | 3.90841 | 2.1235  | 0.03371  | 0.1002   | 0       | 0       | 0       | 68.4232 | 0       | 98.5293 | Up   |
| Gm11274   | 47.0268 | -0.2691 | 0.72996 | -2.8345 | 0.00459  | 0.02018  | 28.0575 | 79.5355 | 120.315 | 26.9546 | 3.16808 | 24.1296 | Down |
| C2300351  | 179.623 | -0.4545 | 0.21918 | -2.0738 | 0.0381   | 0.1103   | 200.273 | 189.735 | 232.991 | 181.425 | 143.619 | 129.697 | Down |
| Gm46404   | 104.331 | -0.5481 | 0.23269 | -2.3556 | 0.01849  | 0.06282  | 132.548 | 120.741 | 118.405 | 88.1208 | 89.7622 | 76.4105 | Down |
| H4c8      | 62.3154 | -1.039  | 0.37999 | -2.7343 | 0.00625  | 0.02603  | 69.6601 | 84.3268 | 97.3981 | 47.6889 | 50.6892 | 24.1296 | Down |
| H1f3      | 46.6249 | 0.89557 | 0.4185  | 2.13996 | 0.03236  | 0.09701  | 19.35   | 31.6225 | 46.7893 | 61.1662 | 66.5296 | 54.2916 | Up   |
| H2bc8     | 56.7794 | 1.47351 | 0.32315 | 4.55977 | 5.12E-06 | 5.40E-05 | 25.155  | 32.5808 | 32.466  | 85.0107 | 74.9778 | 90.4861 | Up   |
| H2bc6     | 577.537 | -0.5234 | 0.17434 | -3.0025 | 0.00268  | 0.01277  | 684.024 | 665.032 | 694.2   | 487.256 | 559.693 | 375.015 | Down |
| H2ac6     | 51.985  | -0.8272 | 0.38547 | -2.1458 | 0.03189  | 0.09605  | 43.5376 | 83.3685 | 72.5711 | 32.1382 | 39.0729 | 41.2214 | Down |
| Ripor2    | 1439.83 | -0.4084 | 0.1353  | -3.0182 | 0.00254  | 0.01222  | 1753.11 | 1762.24 | 1411.32 | 1259.61 | 1311.58 | 1141.13 | Down |
| Acot13    | 1750.2  | -0.3724 | 0.16841 | -2.2115 | 0.027    | 0.08459  | 1733.76 | 2425.35 | 1765.58 | 1584.1  | 1348.54 | 1643.83 | Down |
| D130043K  | 232.986 | -0.6898 | 0.33707 | -2.0465 | 0.04071  | 0.11607  | 274.77  | 311.434 | 276.916 | 184.535 | 91.8742 | 258.388 | Down |
| Dcdc2a    | 856.379 | -1.3182 | 0.33246 | -3.9651 | 7.34E-05 | 0.00058  | 731.431 | 1617.54 | 1318.69 | 469.632 | 306.247 | 694.732 | Down |
| Gm11353   | 165.72  | -0.4625 | 0.21526 | -2.1484 | 0.03168  | 0.09556  | 208.013 | 192.61  | 175.698 | 136.846 | 118.275 | 162.875 | Down |
| Gm40841   | 41.6793 | -1.6329 | 0.43115 | -3.7873 | 0.00015  | 0.0011   | 50.3101 | 87.2015 | 51.5637 | 23.8445 | 20.0645 | 17.0918 | Down |
| 2610307P  | 220.398 | -0.6267 | 0.1769  | -3.543  | 0.0004   | 0.00253  | 251.55  | 260.646 | 290.284 | 173.132 | 186.916 | 159.859 | Down |
| Sox4      | 2404.27 | 0.43996 | 0.15761 | 2.79154 | 0.00525  | 0.02256  | 1816    | 1836.98 | 2468.37 | 2501.6  | 3030.79 | 2771.89 | Up   |
| E2f3      | 551.002 | 0.5702  | 0.15961 | 3.57244 | 0.00035  | 0.00229  | 397.643 | 529.917 | 402.961 | 651.058 | 656.848 | 667.586 | Up   |
| Mboat1    | 1181.08 | 0.42509 | 0.11485 | 3.70118 | 0.00021  | 0.00148  | 936.541 | 1078.04 | 1010.27 | 1433.78 | 1358.05 | 1269.82 | Up   |
| Agtr1a    | 906.848 | -1.0861 | 0.10839 | -10.02  | 1.25E-23 | 1.49E-21 | 1175.51 | 1221.78 | 1301.51 | 588.855 | 571.31  | 582.127 | Down |
| Uqcrls1   | 5359.5  | -0.4786 | 0.2008  | -2.3836 | 0.01714  | 0.05907  | 5641.5  | 8357.93 | 4721.9  | 4702.54 | 4492.33 | 4240.78 | Down |
| 1700018A  | 81.9123 | -0.8204 | 0.2953  | -2.7784 | 0.00546  | 0.02333  | 82.2376 | 120.741 | 110.766 | 68.4232 | 57.0254 | 52.2808 | Down |
| Foxf2     | 1577.42 | -0.4652 | 0.13853 | -3.358  | 0.00079  | 0.00455  | 1864.38 | 1687.49 | 1936.5  | 1249.24 | 1536.52 | 1190.39 | Down |
| Foxc1     | 472.593 | -0.9031 | 0.21134 | -4.2734 | 1.92E-05 | 0.00017  | 513.743 | 795.355 | 538.554 | 354.557 | 292.519 | 340.831 | Down |
| Gmids     | 860.594 | 0.71907 | 0.13397 | 5.36754 | 7.98E-08 | 1.20E-06 | 647.258 | 702.404 | 601.576 | 1054.34 | 1182.75 | 975.239 | Up   |
| Myk4      | 413.946 | -5.8326 | 1.03246 | -5.6492 | 1.61E-08 | 2.80E-07 | 336.691 | 1796.73 | 307.472 | 8.29373 | 6.33615 | 28.1512 | Down |
| Wrrn1     | 2354.62 | -0.2038 | 0.0904  | -2.2543 | 0.02418  | 0.07756  | 2580.33 | 2403.31 | 2578.18 | 2256.93 | 2198.64 | 2110.34 | Down |
| Serpinb1a | 2009.27 | 0.82701 | 0.22068 | 3.74751 | 0.00018  | 0.00127  | 1859.54 | 1305.15 | 1181.19 | 2269.37 | 3274.73 | 2165.63 | Up   |
| Serpinb6b | 10183.6 | 0.85078 | 0.10561 | 8.0559  | 7.89E-16 | 4.45E-14 | 7950.93 | 6535.32 | 7308.67 | 12673.9 | 13519.2 | 13113.4 | Up   |
| Serpinb9  | 12719.4 | 0.94971 | 0.1277  | 7.43703 | 1.03E-13 | 4.36E-12 | 9993.32 | 7555.87 | 8484.13 | 16091.9 | 17688.4 | 16502.6 | Up   |
| Gm6093    | 1.73029 | 4.29133 | 2.17467 | 1.97333 | 0.04846  | NA       | 0       | 0       | 0       | 4.14686 | 4.2241  | 2.0108  | Up   |
| Ripk1     | 2696.61 | 0.45852 | 0.09739 | 4.70789 | 2.50E-06 | 2.83E-05 | 2347.16 | 2140.75 | 2327.05 | 2943.24 | 3270.51 | 3150.93 | Up   |
| Slc22a23  | 5441.62 | 0.64085 | 0.10602 | 6.04488 | 1.50E-09 | 3.21E-08 | 4682.71 | 3901.07 | 4173.79 | 6341.59 | 6852.55 |         |      |

|           |         |         |         |         |          |          |         |         |         |         |         |         |      |
|-----------|---------|---------|---------|---------|----------|----------|---------|---------|---------|---------|---------|---------|------|
| Gm47732   | 17.756  | -1.4301 | 0.66189 | -2.1606 | 0.03073  | 0.0934   | 25.155  | 12.4574 | 40.1051 | 10.3672 | 7.39218 | 11.0594 | Down |
| Gm47754   | 42.7721 | 1.25157 | 0.45946 | 2.72398 | 0.00645  | 0.02669  | 27.09   | 34.4973 | 14.3232 | 42.5053 | 72.8658 | 65.3511 | Up   |
| Rreb1     | 3055.5  | 0.31396 | 0.13072 | 2.40183 | 0.01631  | 0.05677  | 2659.66 | 2869.98 | 2643.12 | 3401.46 | 3848.16 | 2910.64 | Up   |
| Snrrp48   | 2548.58 | -0.3206 | 0.11505 | -2.787  | 0.00532  | 0.02282  | 2612.25 | 2848.9  | 3030.8  | 2062.03 | 2308.47 | 2429.05 | Down |
| Gm47990   | 3.53676 | -4.1847 | 1.679   | -2.4924 | 0.01269  | 0.04642  | 7.74001 | 8.62433 | 3.81953 | 1.03672 | 0       | 0       | Down |
| Bmp6      | 8020.69 | -0.7406 | 0.15326 | -4.8326 | 1.35E-06 | 1.61E-05 | 10150.1 | 9178.2  | 10777.8 | 5732    | 7238    | 5048.12 | Down |
| Txndc5    | 11766.1 | 0.22261 | 0.08444 | 2.63641 | 0.00838  | 0.03302  | 11179.5 | 10588.8 | 10812.1 | 13438.9 | 12334.4 | 12242.8 | Up   |
| Bloc1s5   | 1002.58 | -0.2701 | 0.12449 | -2.17   | 0.03001  | 0.0918   | 989.754 | 1130.75 | 1167.82 | 926.824 | 957.815 | 842.526 | Down |
| Slc35b3   | 2542.51 | 0.36299 | 0.09667 | 3.75504 | 0.00017  | 0.00124  | 2085.93 | 2327.61 | 2259.25 | 2858.23 | 2984.33 | 2739.72 | Up   |
| Gcnt2     | 560.36  | 0.68637 | 0.18131 | 3.78561 | 0.00015  | 0.0011   | 528.256 | 361.264 | 399.141 | 633.433 | 699.089 | 740.98  | Up   |
| A730081C  | 95.76   | -0.8518 | 0.28835 | -2.9541 | 0.00314  | 0.01463  | 138.353 | 109.241 | 122.225 | 53.9092 | 63.3615 | 87.4699 | Down |
| Tmem14c   | 3697.14 | 0.44877 | 0.11002 | 4.07898 | 4.52E-05 | 0.00037  | 3065.04 | 3313.66 | 3001.2  | 4472.39 | 4505    | 3825.55 | Up   |
| Gcm2      | 19.4731 | 1.54311 | 0.65692 | 2.34899 | 0.01882  | 0.06373  | 18.3825 | 5.74955 | 5.7293  | 24.8812 | 36.9609 | 25.135  | Up   |
| Nedd9     | 8051.43 | 0.34386 | 0.12526 | 2.74504 | 0.00605  | 0.02533  | 7350.11 | 6665.65 | 7273.34 | 8582.97 | 10370.2 | 8066.33 | Up   |
| Tmem170   | 2599.18 | 0.41252 | 0.08389 | 4.91731 | 8.77E-07 | 1.10E-05 | 2277.5  | 2269.16 | 2143.71 | 2946.35 | 2944.2  | 3014.19 | Up   |
| Adtrp     | 130.055 | 2.6726  | 0.46276 | 5.77538 | 7.68E-09 | 1.43E-07 | 46.4401 | 46.9547 | 12.4135 | 249.849 | 280.903 | 143.772 | Up   |
| Phactr1   | 5294.52 | -0.3949 | 0.11286 | -3.4992 | 0.00047  | 0.00293  | 6558.69 | 5376.79 | 6108.39 | 4656.93 | 4773.23 | 4293.06 | Down |
| Gfod1     | 1324.85 | -0.3382 | 0.12143 | -2.785  | 0.00535  | 0.02294  | 1409.65 | 1509.26 | 1519.22 | 1047.08 | 1292.58 | 1171.29 | Down |
| Sirt5     | 756.788 | -0.521  | 0.13554 | -3.8437 | 0.00012  | 0.0009   | 929.769 | 957.3   | 788.733 | 600.258 | 668.464 | 596.203 | Down |
| Nol7      | 3661.18 | -0.0282 | 0.08553 | -2.4338 | 0.01494  | 0.05288  | 3931.93 | 3801.41 | 4041.06 | 3482.33 | 3466.93 | 3243.42 | Down |
| Mcur1     | 3685.64 | 0.24115 | 0.11037 | 2.18501 | 0.02889  | 0.08937  | 3171.47 | 3692.17 | 3271.43 | 3745.65 | 3940.03 | 4293.06 | Up   |
| Cd83      | 1327.17 | 0.99023 | 0.1826  | 5.42295 | 5.86E-08 | 9.14E-07 | 1139.72 | 775.231 | 751.493 | 1633.86 | 1804.75 | 1857.98 | Up   |
| Gm40932   | 7.70148 | 3.91324 | 1.34183 | 2.91635 | 0.00354  | 0.01623  | 0       | 1.91652 | 0.95488 | 30.0648 | 4.2241  | 9.04861 | Up   |
| 503343011 | 61.3384 | 0.76295 | 0.32071 | 2.37894 | 0.01736  | 0.05965  | 53.2126 | 47.9129 | 35.3307 | 85.0107 | 79.2019 | 67.3619 | Up   |
| Stmnd1    | 1815.1  | -0.855  | 0.26195 | -3.2641 | 0.0011   | 0.00603  | 1883.73 | 3004.14 | 2125.57 | 1434.81 | 822.644 | 1619.7  | Down |
| Cap2      | 881.758 | -0.7985 | 0.29898 | -2.6707 | 0.00757  | 0.03039  | 774.001 | 1741.16 | 844.116 | 644.837 | 535.405 | 751.034 | Down |
| 2010001K  | 669.83  | -0.394  | 0.15734 | -2.5044 | 0.01227  | 0.0452   | 676.284 | 800.146 | 805.921 | 630.323 | 489.996 | 616.311 | Down |
| Rnf144b   | 2467.24 | 0.50869 | 0.13506 | 3.76648 | 0.00017  | 0.00118  | 2303.62 | 1744.99 | 2061.59 | 2681.98 | 3040.3  | 2970.96 | Up   |
| Id4       | 706.614 | -0.8392 | 0.22252 | -3.7713 | 0.00016  | 0.00116  | 696.601 | 1234.24 | 788.733 | 493.477 | 505.836 | 520.798 | Down |
| Gm48648   | 2.56235 | -4.7539 | 1.89966 | -2.5025 | 0.01233  | 0.04537  | 5.80501 | 5.74955 | 3.81953 | 0       | 0       | 0       | Down |
| 67204271C | 439.423 | -0.7451 | 0.2585  | -2.8826 | 0.00394  | 0.01776  | 595.013 | 352.639 | 703.749 | 332.786 | 290.407 | 361.944 | Down |
| Ptpdc1    | 825.584 | -0.4005 | 0.14927 | -2.6827 | 0.0073   | 0.02953  | 1006.2  | 948.676 | 863.214 | 746.435 | 786.739 | 602.235 | Down |
| Fam120a   | 13762.7 | 0.34571 | 0.07629 | 4.53166 | 5.85E-06 | 6.08E-05 | 11693.2 | 12225.5 | 12445.9 | 14972.3 | 15589   | 15650.1 | Up   |
| Wnk2      | 221.331 | -2.8604 | 0.3599  | -7.9479 | 1.90E-15 | 1.01E-13 | 308.633 | 611.369 | 247.315 | 52.8725 | 46.4651 | 61.3295 | Down |
| Ninj1     | 1550.4  | -0.3801 | 0.11891 | -3.1964 | 0.00139  | 0.00736  | 1838.25 | 1785.24 | 1636.67 | 1398.53 | 1437.25 | 1206.48 | Down |
| Susd3     | 308.546 | 1.18667 | 0.28801 | 4.12019 | 3.79E-05 | 0.00032  | 214.785 | 203.151 | 147.052 | 427.127 | 577.646 | 281.512 | Up   |
| Fgd3      | 412.757 | 0.62705 | 0.18573 | 3.37616 | 0.00074  | 0.0043   | 367.651 | 342.098 | 263.548 | 468.596 | 568.142 | 466.506 | Up   |
| Bicd2     | 6445.77 | -0.3329 | 0.12355 | -2.6946 | 0.00705  | 0.0287   | 6354.55 | 7108.36 | 8095.5  | 5446.91 | 6137.62 | 5531.72 | Down |
| Cenpp     | 488.646 | -0.8995 | 0.16325 | -5.5096 | 3.60E-08 | 5.83E-07 | 538.898 | 690.904 | 678.922 | 362.851 | 309.415 | 350.885 | Down |
| Gm8739    | 109.344 | -0.7153 | 0.30406 | -2.3526 | 0.01864  | 0.06322  | 94.8151 | 163.862 | 148.962 | 81.9006 | 97.1543 | 69.3727 | Down |
| Hist1h2a1 | 116.853 | -0.6077 | 0.26146 | -2.3243 | 0.02011  | 0.06708  | 146.093 | 127.448 | 149.917 | 82.9373 | 77.0899 | 117.632 | Down |
| Cks2      | 272.267 | 0.58907 | 0.21155 | 2.78453 | 0.00536  | 0.02296  | 247.68  | 222.316 | 182.383 | 389.805 | 277.735 | 313.685 | Up   |
| Sema4d    | 1638.28 | 0.66717 | 0.14422 | 4.62599 | 3.73E-06 | 4.07E-05 | 1378.69 | 1339.65 | 1079.97 | 1777.97 | 2130    | 2123.41 | Up   |
| Gadd45g   | 2062.11 | 0.76771 | 0.21731 | 3.53276 | 0.00041  | 0.00262  | 1099.08 | 1973.05 | 1505.85 | 2628.07 | 2974.82 | 2191.77 | Up   |
| Syk       | 3980.55 | 1.17992 | 0.18696 | 6.31106 | 2.77E-10 | 6.81E-09 | 3115.35 | 2332.4  | 1865.84 | 5048.81 | 5893.68 | 5627.23 | Up   |
| Auh       | 1942.38 | -0.2358 | 0.11576 | -2.0374 | 0.04161  | 0.11823  | 2104.32 | 2216.45 | 1981.38 | 1849.5  | 1905.07 | 1597.58 | Down |
| Gm33424   | 81.5241 | -0.7923 | 0.29066 | -2.7259 | 0.00641  | 0.02658  | 108.36  | 105.408 | 96.4432 | 60.1295 | 45.4091 | 73.3943 | Down |
| Gm48336   | 28.4534 | -1.7046 | 0.57099 | -2.9854 | 0.00283  | 0.0134   | 51.2776 | 45.9964 | 33.4209 | 5.18358 | 13.7283 | 21.1134 | Down |
| Gm2762    | 9.16466 | 3.09997 | 1.08872 | 2.84735 | 0.00441  | 0.01949  | 0       | 1.91652 | 3.81953 | 22.8077 | 6.33615 | 20.108  | Up   |
| Hrh2      | 80.0121 | 1.16381 | 0.37033 | 3.14262 | 0.00167  | 0.00858  | 75.4651 | 38.3303 | 34.3758 | 105.745 | 124.611 | 101.545 | Up   |
| Gm2830    | 224.331 | -0.8513 | 0.17999 | -4.7295 | 2.25E-06 | 2.56E-05 | 277.673 | 298.977 | 289.33  | 182.462 | 145.732 | 151.816 | Down |
| Faf2      | 3939.28 | 0.34523 | 0.09413 | 3.66766 | 0.00024  | 0.00165  | 3616.52 | 3559.93 | 3234.19 | 4209.07 | 4520.84 | 4495.15 | Up   |
| HK3       | 405.014 | 1.51031 | 0.28175 | 5.36044 | 8.30E-08 | 1.25E-06 | 238.973 | 253.939 | 138.458 | 572.267 | 773.011 | 453.436 | Up   |
| Fgfr4     | 2755.39 | -0.8996 | 0.18994 | -4.7361 | 2.18E-06 | 2.49E-05 | 4309.25 | 2806.74 | 3646.7  | 1916.89 | 2245.11 | 1607.64 | Down |
| Prelid1   | 7533.73 | 0.3577  | 0.10034 | 3.56478 | 0.00036  | 0.00235  | 6805.41 | 6389.67 | 6618.29 | 8795.5  | 8942.42 | 7651.1  | Up   |
| Mxd3      | 41.0415 | 1.1394  | 0.3938  | 2.89332 | 0.00381  | 0.01726  | 32.895  | 22.0399 | 21.9623 | 45.6155 | 64.4175 | 59.3187 | Up   |
| Lman2     | 10397.9 | 0.24137 | 0.09336 | 2.58536 | 0.00973  | 0.03735  | 9926.57 | 9599.84 | 9063.75 | 11537.6 | 11786.3 | 10473.3 | Up   |
| Pdlim7    | 2166.8  | -0.6269 | 0.19105 | -3.2815 | 0.00103  | 0.00573  | 1891.47 | 2944.73 | 3054.67 | 1695.03 | 1836.43 | 1578.48 | Down |
| Dok3      | 1283.65 | 0.62813 | 0.16835 | 3.73101 | 0.00019  | 0.00134  | 1053.61 | 1094.33 | 877.537 | 1456.59 | 1877.61 | 1342.21 | Up   |
| Fam193b   | 7166.45 | -0.292  | 0.10138 | -2.88   | 0.00398  | 0.01788  | 7650.03 | 7364.22 | 8653.15 | 6575.89 | 6583.26 | 6172.16 | Down |
| Tmed9     | 6574.69 | 0.28276 | 0.10643 | 2.65671 | 0.00789  | 0.03144  | 5719.87 | 5906.71 | 6170.45 | 7569.06 | 7642.46 | 6439.59 | Up   |
| Macroh2a  | 2923.05 | 0.44187 | 0.09903 | 4.46178 | 8.13E-06 | 8.17E-05 | 2678.04 | 2335.28 | 2423.49 | 3366.22 | 3252.56 | 3482.71 | Up   |
| Tifab     | 581.957 | 1.29978 | 0.20681 | 6.28473 | 3.28E-10 | 7.92E-09 | 354.106 | 366.055 | 288.375 | 757.839 | 1050.75 | 674.624 | Up   |
| Slc25a48  | 19.9953 | -1.8669 | 0.65249 | -2.8612 | 0.00422  | 0.0188   | 31.9275 | 45.9964 | 16.233  | 12.4406 | 6.33615 | 7.03781 | Down |
| Tgfb1     | 5324.75 | 1.47349 | 0.11253 | 13.0945 | 3.54E-39 | 1.59E-36 | 3059.24 | 2934.19 | 2465.51 | 7724.57 | 7997.28 | 7767.73 | Up   |
| Trpc7     | 22.9696 | 3.2104  | 0.60761 | 5.28368 | 1.27E-07 | 1.84E-06 | 4.83751 | 4.79129 | 3.81953 | 36.2851 | 33.7928 | 54.2916 | Up   |
| Klhl3     | 288.405 | -0.6039 | 0.17879 | -3.3777 | 0.00073  | 0.00428  | 341.528 | 394.803 | 307.472 | 213.563 | 220.709 | 252.356 | Down |
| Gm48295   | 3.3695  | -4.1115 | 1.98716 | -2.069  | 0.03854  | 0.11133  | 1.935   | 16.2904 | 0.95488 | 1.03672 | 0       | 0       | Down |
| 2210016F  | 2344.45 | 0.44492 | 0.12119 | 3.67129 | 0.00024  | 0.00163  | 2151.72 | 1979.76 | 1825.74 | 2764.92 | 2912.52 | 2432.06 | Up   |
| Ntrk2     | 2634.17 | 1.17496 | 0.24597 | 4.77674 | 1.78E-06 | 2.08E-05 | 1589.6  | 2131.17 | 1130.58 | 4696.32 | 3161.74 | 3095.63 | Up   |
| Golm1     | 3510.84 | 2.08088 | 0.13728 | 15.1575 | 6.76E-52 | 7.67E-49 | 1495.76 | 1409.6  | 1121.99 | 5257.19 | 5834.54 | 5945.94 | Up   |
| Isca1     | 4896.63 | -0.2832 | 0.11171 | -2.5352 | 0.01124  | 0.04206  | 5161.62 | 5913.41 | 5052.29 | 4615.46 | 4060.42 | 4576.58 | Down |
| Tut7      | 2603.23 | 0.52207 | 0.10813 | 4.82838 | 1.38E-06 | 1.64E-05 | 2242.67 | 1969.22 | 2200.05 | 2844.75 | 3114.22 | 3248.45 | Up   |
| Gm19792   | 21.9764 | 2.0261  | 0.68795 | 2.94515 | 0.00323  | 0.015    | 14.5125 | 7.66607 | 3.81953 | 20.7343 | 55.9693 | 29.1566 | Up   |
| Gm3604    | 171.527 | 0.68495 | 0.19334 | 3.54271 | 0.0004   | 0.00253  | 137.385 | 131.281 | 126.045 | 188.682 | 217.541 | 228.226 | Up   |
| Gm48691   | 28.3583 | 1.64159 | 0.57168 | 2.87153 | 0.00408  | 0.0183   | 10.6425 | 20.1234 | 10.5037 | 32.1382 | 67.5856 | 29.1566 | Up   |
| Gm48701   | 32.8722 | 0.92257 | 0.44575 | 2.06971 | 0.03848  | 0.11122  |         |         |         |         |         |         |      |

|           |         |         |         |         |          |          |         |         |         |         |         |         |      |
|-----------|---------|---------|---------|---------|----------|----------|---------|---------|---------|---------|---------|---------|------|
| Uqcrb     | 2746.42 | -0.3272 | 0.14906 | -2.1954 | 0.02814  | 0.08754  | 2648.05 | 3463.15 | 3058.49 | 2796.02 | 2214.49 | 2298.35 | Down |
| Mterf3    | 2661.23 | -0.3194 | 0.08329 | -3.8345 | 0.00013  | 0.00093  | 2921.85 | 2958.14 | 2984.01 | 2352.31 | 2296.86 | 2454.18 | Down |
| Ptdss1    | 1512.8  | 0.33851 | 0.09684 | 3.49562 | 0.00047  | 0.00296  | 1396.1  | 1264.9  | 1347.34 | 1709.54 | 1717.1  | 1641.82 | Up   |
| F630042J  | 139.636 | 0.58634 | 0.23939 | 2.44929 | 0.01431  | 0.05115  | 92.8801 | 122.657 | 119.36  | 139.957 | 189.029 | 173.934 | Up   |
| Zfp874a   | 690.67  | -0.4279 | 0.18473 | -2.3164 | 0.02054  | 0.06813  | 786.579 | 790.563 | 800.192 | 572.267 | 461.483 | 732.937 | Down |
| Zfp874b   | 452.971 | -0.4194 | 0.15151 | -2.7682 | 0.00564  | 0.02396  | 502.133 | 464.755 | 588.208 | 376.328 | 381.225 | 405.177 | Down |
| Zfp58     | 239.82  | -0.4283 | 0.16837 | -2.5439 | 0.01096  | 0.0412   | 260.258 | 282.686 | 282.645 | 202.16  | 187.973 | 223.199 | Down |
| Zfp738    | 342.781 | 0.44805 | 0.16051 | 2.79145 | 0.00525  | 0.02256  | 273.803 | 317.184 | 278.826 | 414.686 | 420.298 | 351.89  | Up   |
| Zfp65     | 742.314 | 0.35964 | 0.13963 | 2.57573 | 0.01     | 0.03823  | 710.146 | 643.95  | 596.802 | 742.289 | 864.885 | 895.812 | Up   |
| Zfp85os   | 113.332 | 0.64695 | 0.25286 | 2.55848 | 0.01051  | 0.03986  | 84.1726 | 81.452  | 99.3078 | 130.626 | 165.796 | 118.637 | Up   |
| 1700001L  | 501.962 | -0.4559 | 0.22548 | -2.022  | 0.04318  | 0.12168  | 579.533 | 655.449 | 507.043 | 493.477 | 295.687 | 480.582 | Down |
| Ube2ql1   | 41.153  | -1.6134 | 0.39396 | -4.0954 | 4.21E-05 | 0.00035  | 48.3751 | 69.9529 | 67.7967 | 18.6609 | 19.0085 | 23.1242 | Down |
| Gm3772    | 3.05128 | -5.0055 | 1.91365 | -2.6157 | 0.00891  | 0.03469  | 11.61   | 3.83303 | 2.86465 | 0       | 0       | 0       | Down |
| Gm40999   | 133.69  | 1.83488 | 0.29492 | 6.22161 | 4.92E-10 | 1.14E-08 | 48.3751 | 65.1616 | 62.0674 | 276.803 | 164.74  | 184.994 | Up   |
| Irx1      | 7349.15 | 1.16917 | 0.2531  | 4.61932 | 3.85E-06 | 4.18E-05 | 6535.47 | 3455.48 | 3581.77 | 10971.6 | 7919.13 | 11631.5 | Up   |
| Gm20554   | 118.193 | 0.68007 | 0.26986 | 2.52007 | 0.01173  | 0.04358  | 85.1401 | 75.7024 | 111.721 | 153.434 | 118.275 | 164.886 | Up   |
| Irx2      | 5658.57 | 0.54193 | 0.0967  | 5.60396 | 2.10E-08 | 3.55E-07 | 4553.06 | 4477.94 | 4793.51 | 6885.87 | 6164.02 | 7077.02 | Up   |
| Ndufs6    | 1037.23 | -0.3464 | 0.12938 | -2.6777 | 0.00741  | 0.02989  | 1131.01 | 1210.28 | 1142.04 | 1018.05 | 917.686 | 804.321 | Down |
| Lpcat1    | 23395.2 | 0.89322 | 0.13857 | 6.4462  | 1.15E-10 | 3.02E-09 | 18734.7 | 14119   | 16273.1 | 30531.3 | 33364.1 | 27348.9 | Up   |
| Ciptm1l   | 8443.78 | 0.46375 | 0.09323 | 4.97428 | 6.55E-07 | 8.44E-06 | 7321.08 | 7216.65 | 6756.75 | 9936.92 | 10316.3 | 9114.96 | Up   |
| Tert      | 111.042 | 0.70514 | 0.29199 | 2.41492 | 0.01574  | 0.05516  | 77.4001 | 65.1616 | 110.766 | 128.553 | 122.499 | 161.87  | Up   |
| Nkd2      | 1327.25 | -0.3999 | 0.1907  | -2.0969 | 0.03601  | 0.10558  | 1708.61 | 1545.67 | 1275.72 | 1432.74 | 1048.63 | 952.115 | Down |
| Gm15912   | 151.517 | -0.6375 | 0.22059 | -2.8898 | 0.00385  | 0.01743  | 203.175 | 176.32  | 173.789 | 133.736 | 123.555 | 98.5293 | Down |
| Slc9a3    | 5.16943 | -2.6907 | 1.26153 | -2.1329 | 0.03294  | 0.09843  | 3.87001 | 12.4574 | 10.5037 | 2.07343 | 2.11205 | 0       | Down |
| Sdha      | 13185.3 | -0.2753 | 0.13415 | -2.0522 | 0.04015  | 0.11486  | 13558.6 | 17112.6 | 12647.4 | 12136.8 | 11563.5 | 12093   | Down |
| Gm46430   | 789.8   | -0.3201 | 0.11609 | -2.757  | 0.00583  | 0.02464  | 821.409 | 903.638 | 906.184 | 672.829 | 692.753 | 741.986 | Down |
| Erap1     | 3593.69 | 0.62454 | 0.09455 | 3.43235 | 0.0006   | 0.00361  | 3335.95 | 3127.76 | 3110.05 | 3807.86 | 3912.57 | 4267.93 | Up   |
| Cast      | 6067.82 | 0.31962 | 0.08577 | 3.72629 | 0.00019  | 0.00136  | 5454.77 | 5454.41 | 5286.23 | 6399.65 | 6683.58 | 7128.29 | Up   |
| Pcsk1     | 121.089 | -2.1703 | 0.26742 | -8.1156 | 4.83E-16 | 2.83E-14 | 219.623 | 160.029 | 214.849 | 48.7256 | 39.0729 | 44.2376 | Down |
| Ell2      | 2495.15 | 0.51897 | 0.09414 | 5.51256 | 3.54E-08 | 5.74E-07 | 2009.5  | 2122.54 | 2021.49 | 2768.03 | 2953.7  | 3095.63 | Up   |
| Glrx      | 2521.65 | 1.09708 | 0.13304 | 8.24638 | 1.63E-16 | 1.00E-14 | 1705.71 | 1605.08 | 1508.71 | 3402.5  | 3916.8  | 2991.07 | Up   |
| Rhobtb3   | 514.998 | -0.6268 | 0.14173 | -4.4229 | 9.74E-06 | 9.56E-05 | 618.233 | 694.738 | 562.426 | 405.356 | 417.13  | 392.106 | Down |
| Gm38604   | 40.3929 | -0.9142 | 0.44537 | -2.0527 | 0.0401   | 0.11477  | 39.6676 | 50.7877 | 67.7967 | 27.9913 | 38.0169 | 18.0972 | Down |
| A830082K  | 139.977 | -0.5321 | 0.21823 | -2.438  | 0.01477  | 0.05241  | 160.605 | 174.403 | 161.375 | 107.818 | 134.115 | 101.545 | Down |
| Arrdc3    | 9131.67 | -0.6837 | 0.15975 | -4.2798 | 1.87E-05 | 0.00017  | 9832.72 | 13662.9 | 10271.7 | 7829.28 | 6976.1  | 6217.4  | Down |
| 5430425K  | 263.385 | -1.1724 | 0.26139 | -4.4853 | 7.28E-06 | 7.43E-05 | 290.25  | 417.801 | 386.728 | 187.646 | 110.883 | 187.005 | Down |
| Adgrv1    | 196.296 | -1.161  | 0.33342 | -3.482  | 0.0005   | 0.00309  | 313.47  | 305.685 | 194.796 | 151.361 | 69.6977 | 142.767 | Down |
| Mblac2    | 908.727 | -0.3612 | 0.12584 | -2.8704 | 0.0041   | 0.01835  | 981.046 | 1140.33 | 944.379 | 814.859 | 761.394 | 810.353 | Down |
| A230107N  | 27.298  | -1.2082 | 0.4615  | -2.6179 | 0.00885  | 0.03451  | 44.5051 | 37.3721 | 32.466  | 12.4406 | 16.8964 | 20.108  | Down |
| Rasa1     | 1237.85 | 0.32201 | 0.15233 | 2.11397 | 0.03452  | 0.10217  | 1123.27 | 983.173 | 1194.56 | 1239.91 | 1272.51 | 1613.67 | Up   |
| Cox7c     | 1944.41 | -0.3506 | 0.14935 | -2.3472 | 0.01891  | 0.06394  | 1837.29 | 2499.14 | 2201.96 | 1896.15 | 1626.28 | 1605.63 | Down |
| Edil3     | 868.123 | -0.6607 | 0.14052 | -4.7019 | 2.58E-06 | 2.91E-05 | 1007.17 | 963.05  | 1220.34 | 634.47  | 676.912 | 706.797 | Down |
| Hapln1    | 44.0719 | 1.52675 | 0.46806 | 3.26185 | 0.00111  | 0.00608  | 20.3175 | 24.9147 | 22.9172 | 87.0841 | 33.7928 | 75.4051 | Up   |
| Atp6ap1l  | 6.99544 | 4.38442 | 1.88094 | 2.33097 | 0.01975  | 0.06616  | 0       | 1.91652 | 0       | 27.9913 | 0       | 12.0648 | Up   |
| Rps23     | 12028.6 | -0.258  | 0.12388 | -2.0831 | 0.03724  | 0.10839  | 13174.5 | 11527.9 | 14602.1 | 11362.4 | 11503.3 | 10001.7 | Down |
| Ssbp2     | 1548.76 | -0.3281 | 0.10756 | -3.0508 | 0.00228  | 0.01114  | 1796.65 | 1758.4  | 1617.57 | 1393.35 | 1277.79 | 1448.78 | Down |
| 4833422C  | 396.055 | -0.369  | 0.15571 | -2.3699 | 0.0178   | 0.06088  | 433.441 | 489.67  | 416.329 | 326.565 | 325.256 | 385.069 | Down |
| Ckmt2     | 1761.26 | -5.5423 | 0.78729 | -7.0398 | 1.93E-12 | 6.61E-11 | 1928.23 | 6808.43 | 1608.98 | 59.0928 | 41.185  | 121.654 | Down |
| Ankrd34b  | 44.2568 | 2.01018 | 0.372   | 5.40377 | 6.53E-08 | 1.01E-06 | 17.415  | 16.2904 | 19.0977 | 62.203  | 78.1459 | 72.3889 | Up   |
| Fam151b   | 756.683 | -0.3711 | 0.13794 | -2.6899 | 0.00715  | 0.02901  | 817.539 | 922.803 | 820.244 | 663.498 | 586.094 | 729.921 | Down |
| Mtx3      | 1215.79 | -0.2694 | 0.12689 | -2.1236 | 0.03371  | 0.1002   | 1197.77 | 1365.52 | 1423.73 | 1002.5  | 1128.89 | 1176.32 | Down |
| Cmya5     | 963.201 | -3.7855 | 0.58959 | -6.4205 | 1.36E-10 | 3.53E-09 | 1170.68 | 3267.66 | 950.108 | 160.691 | 101.378 | 128.691 | Down |
| Gm47155   | 102.504 | -0.723  | 0.31558 | -2.291  | 0.02196  | 0.0718   | 110.295 | 164.82  | 107.902 | 55.9827 | 85.5381 | 90.4861 | Down |
| Jmy       | 2623.07 | -0.2352 | 0.09565 | -2.4586 | 0.01395  | 0.05013  | 2705.13 | 2753.08 | 3050.85 | 2354.38 | 2448.92 | 2426.03 | Down |
| Arsb      | 2192.64 | 0.3427  | 0.10516 | 3.2588  | 0.00112  | 0.00614  | 2081.1  | 1886.81 | 1832.42 | 2608.38 | 2404.57 | 2342.58 | Up   |
| Lhflp2    | 1000.52 | 1.87778 | 0.23367 | 8.03593 | 9.29E-16 | 5.19E-14 | 513.743 | 468.588 | 301.743 | 1423.41 | 1970.54 | 1325.12 | Up   |
| Scamp1    | 7655.73 | 0.70807 | 0.09098 | 7.78263 | 7.10E-15 | 3.51E-13 | 5834.03 | 5717.93 | 5889.72 | 8843.19 | 9500    | 10149.5 | Up   |
| Gm9776    | 139.609 | 0.66022 | 0.22917 | 2.8809  | 0.00397  | 0.01785  | 115.133 | 112.116 | 97.3981 | 140.993 | 189.029 | 182.983 | Up   |
| Ap3b1     | 4094.44 | 0.39676 | 0.0957  | 4.14603 | 3.38E-05 | 0.00029  | 3764.55 | 3366.36 | 3473.86 | 4584.36 | 4910.52 | 4467    | Up   |
| Tbca      | 2780.98 | 0.21473 | 0.099   | 2.16906 | 0.03008  | 0.09199  | 2619.03 | 2474.22 | 2629.75 | 314.201 | 3069.87 | 2752.79 | Up   |
| Pde8b     | 2725.76 | -0.3793 | 0.10648 | -3.5625 | 0.00037  | 0.00237  | 3141.48 | 2778.95 | 3325.86 | 2335.72 | 2347.54 | 2425.03 | Down |
| Zbed3     | 816.986 | 0.31119 | 0.10857 | 2.86616 | 0.00415  | 0.01857  | 763.359 | 701.445 | 722.846 | 938.228 | 891.285 | 884.753 | Up   |
| F2rl1     | 872.009 | 0.39579 | 0.19764 | 2.0026  | 0.04522  | 0.12605  | 792.384 | 659.282 | 807.831 | 1221.25 | 752.946 | 998.363 | Up   |
| Sv2c      | 51.9295 | -1.0763 | 0.46647 | -2.3074 | 0.02103  | 0.06938  | 81.2701 | 57.4955 | 72.5711 | 14.514  | 47.5211 | 38.2052 | Down |
| Col4a3bp  | 5895.03 | 0.24306 | 0.08334 | 2.91667 | 0.00354  | 0.01621  | 5450.9  | 5323.13 | 5424.69 | 6741.76 | 6310.81 | 6118.87 | Up   |
| Hmgcr     | 4596.15 | 1.55202 | 0.1226  | 12.6592 | 9.96E-37 | 3.70E-34 | 2621.93 | 2317.07 | 2074.01 | 6703.4  | 7361.55 | 6498.91 | Up   |
| Hexb      | 2565.44 | 1.23614 | 0.17432 | 7.09141 | 1.33E-12 | 4.70E-11 | 1875.99 | 1431.64 | 1279.54 | 3099.78 | 3697.14 | 4008.53 | Up   |
| Enc1      | 1214.5  | 0.55033 | 0.19894 | 2.76636 | 0.00567  | 0.02407  | 911.386 | 1070.37 | 974.935 | 1302.12 | 1886.06 | 1142.14 | Up   |
| Lncenc1   | 2.411   | 4.77074 | 1.94119 | 2.45764 | 0.01399  | 0.05023  | 0       | 0       | 0       | 6.2203  | 4.2241  | 4.0216  | Up   |
| Gm5086    | 45.7308 | 0.8247  | 0.39413 | 2.09245 | 0.0364   | 0.10653  | 46.4401 | 24.9147 | 27.6916 | 50.7991 | 60.1934 | 64.3457 | Up   |
| Tnpo1     | 6736.21 | 0.2456  | 0.09653 | 2.54442 | 0.01095  | 0.04118  | 6130.09 | 5866.46 | 6496.07 | 6774.94 | 7599.16 | 7550.56 | Up   |
| A930014C  | 12.6518 | 3.88595 | 0.95239 | 4.08021 | 4.50E-05 | 0.00037  | 3.87001 | 0       | 0.95488 | 24.8812 | 20.0645 | 26.1404 | Up   |
| Zfp366    | 1991.92 | -0.4097 | 0.11941 | -3.4311 | 0.0006   | 0.00362  | 2087.87 | 2268.2  | 2462.64 | 1576.84 | 1695.98 | 1859.99 | Down |
| BC001981  | 5.9948  | -2.5646 | 1.27585 | -2.0101 | 0.04442  | 0.12435  | 9.67501 | 18.2069 | 2.86465 | 3.11015 | 2.11205 | 0       | Down |
| Naip2     | 1365.98 | 1.93341 | 0.1356  | 14.2581 | 3.99E-46 | 2.87E-43 | 660.804 | 531.834 | 507.998 | 2079.65 | 2240.89 | 2174.68 | Up   |
| Naip5     | 1402.06 | 1.53245 | 0.17283 | 8.86693 | 7.52E-19 | 6.03E-17 | 758.521 | 780.981 | 621.629 | 2347.12 | 1659.02 | 2245.06 | Up   |
| Naip3-ps1 | 79.635  | 1.29695 | 0.2849  | 4.5523  | 5.31E-06 | 5.57E-05 | 39.6676 | 49.8294 | 48.     |         |         |         |      |

|            |         |         |         |         |          |          |         |         |         |         |         |         |      |
|------------|---------|---------|---------|---------|----------|----------|---------|---------|---------|---------|---------|---------|------|
| Cd180      | 445.133 | 0.62899 | 0.23503 | 2.67622 | 0.00745  | 0.02997  | 454.726 | 306.643 | 287.42  | 485.183 | 665.296 | 471.533 | Up   |
| Nln        | 2250.58 | 0.21147 | 0.10364 | 2.04041 | 0.04131  | 0.11749  | 2263.95 | 2033.42 | 1960.37 | 2381.34 | 2521.79 | 2342.58 | Up   |
| Sgtb       | 416.698 | -0.5134 | 0.14774 | -3.4748 | 0.00051  | 0.00316  | 517.613 | 477.213 | 475.532 | 314.125 | 332.648 | 383.058 | Down |
| Cwc27      | 463.824 | -0.3835 | 0.15205 | -2.5219 | 0.01167  | 0.0434   | 483.751 | 523.209 | 568.155 | 412.613 | 439.307 | 355.912 | Down |
| Nt5el      | 2.95798 | 5.06444 | 2.01444 | 2.51407 | 0.01193  | 0.04413  | 0       | 0       | 0       | 8.29373 | 8.4482  | 1.0054  | Up   |
| Rnf180     | 459.935 | 1.94785 | 0.20832 | 9.35009 | 8.76E-21 | 8.11E-19 | 240.908 | 174.403 | 152.781 | 702.893 | 831.092 | 657.532 | Up   |
| Gm30411    | 15.6209 | -2.8649 | 0.80291 | -3.5682 | 0.00036  | 0.00233  | 12.5775 | 44.0799 | 25.7818 | 4.14686 | 2.11205 | 5.027   | Down |
| Dimt1      | 930.672 | -0.4036 | 0.11615 | -3.4751 | 0.00051  | 0.00316  | 1065.22 | 1019.59 | 1095.25 | 729.848 | 841.652 | 832.472 | Down |
| Ndufaf2    | 680.357 | -0.4233 | 0.13156 | -3.2173 | 0.00129  | 0.00694  | 731.431 | 813.562 | 793.508 | 615.809 | 519.564 | 608.268 | Down |
| Elovl7     | 607.837 | 0.56094 | 0.13938 | 4.02471 | 5.70E-05 | 0.00046  | 514.711 | 515.543 | 443.066 | 706.003 | 793.075 | 674.624 | Up   |
| Pde4d      | 1749.31 | -0.4246 | 0.12563 | -3.38   | 0.00072  | 0.00425  | 1756.98 | 2164.71 | 2093.1  | 1404.75 | 1484.77 | 1591.55 | Down |
| Rab3c      | 324.328 | 1.18969 | 0.25847 | 4.60285 | 4.17E-06 | 4.49E-05 | 248.648 | 183.027 | 161.375 | 439.568 | 575.534 | 337.815 | Up   |
| Gapt       | 303.118 | 3.16258 | 0.4092  | 7.72868 | 1.09E-14 | 5.19E-13 | 82.2376 | 60.3703 | 40.1051 | 469.632 | 882.837 | 283.523 | Up   |
| Plk2       | 4841.94 | 0.41347 | 0.13852 | 2.98483 | 0.00284  | 0.01342  | 3649.42 | 4329.41 | 4479.36 | 5540.21 | 6226.33 | 4826.93 | Up   |
| Gm33172    | 4.60544 | 2.63399 | 1.28155 | 2.05532 | 0.03985  | 0.11415  | 0       | 1.91652 | 1.90977 | 4.14686 | 11.6163 | 8.04321 | Up   |
| Mier3      | 1802.27 | -0.2921 | 0.12101 | -2.414  | 0.01578  | 0.05527  | 2048.2  | 1864.77 | 2039.63 | 1638.01 | 1440.42 | 1782.58 | Down |
| Ddx4       | 167.209 | 2.13311 | 0.46619 | 4.57562 | 4.75E-06 | 5.05E-05 | 47.4076 | 112.116 | 26.7367 | 327.602 | 183.748 | 305.642 | Up   |
| Plpp1      | 6392.74 | -0.6287 | 0.16917 | -3.7163 | 0.0002   | 0.00141  | 8888.44 | 6978.04 | 7425.17 | 5028.07 | 5994    | 4042.72 | Down |
| Dhx29      | 2007.99 | 0.49155 | 0.08471 | 5.80296 | 6.52E-09 | 1.23E-07 | 1683.45 | 1660.66 | 1663.41 | 2290.11 | 2407.74 | 2342.58 | Up   |
| Ccno       | 328.5   | 1.20857 | 0.1937  | 6.23944 | 4.39E-10 | 1.03E-08 | 182.858 | 245.314 | 167.105 | 487.256 | 434.026 | 454.441 | Up   |
| Mcidas     | 111.571 | 2.44708 | 0.25551 | 9.57717 | 9.97E-22 | 1.01E-19 | 39.6676 | 33.5391 | 30.5563 | 200.086 | 180.58  | 184.994 | Up   |
| Cdc20b     | 137.053 | 1.31    | 0.28581 | 4.58353 | 4.57E-06 | 4.88E-05 | 90.9451 | 90.0763 | 55.3832 | 164.838 | 184.804 | 236.269 | Up   |
| Gzma       | 899.518 | -0.4687 | 0.22611 | -2.073  | 0.03817  | 0.11048  | 814.636 | 1309.94 | 1008.36 | 682.159 | 954.647 | 627.37  | Down |
| Hspb3      | 11.3829 | -4.3883 | 1.3833  | -3.1724 | 0.00151  | 0.00788  | 3.87001 | 52.7042 | 8.59395 | 2.07343 | 1.05603 | 0       | Down |
| Fst        | 324.615 | -1.0896 | 0.22332 | -4.8789 | 1.07E-06 | 1.31E-05 | 437.311 | 480.088 | 407.735 | 263.326 | 153.124 | 206.107 | Down |
| Itga1      | 11300.5 | -0.2795 | 0.13753 | -2.032  | 0.04215  | 0.11944  | 11043.1 | 12554.1 | 13577.5 | 8961.37 | 11676.5 | 9990.67 | Down |
| Parp8      | 1315.59 | 0.35276 | 0.11213 | 3.14607 | 0.00165  | 0.0085   | 1206.47 | 1140.33 | 1120.08 | 1454.51 | 1367.55 | 1604.62 | Up   |
| Gm6416     | 14.4444 | -3.4793 | 1.04581 | -3.3269 | 0.00088  | 0.00499  | 13.545  | 46.9547 | 19.0977 | 1.03672 | 0       | 6.03241 | Down |
| Emb        | 14562   | 0.79734 | 0.10542 | 7.56379 | 3.91E-14 | 1.77E-12 | 11438.8 | 10737.3 | 9735.99 | 18169.5 | 19820.5 | 17469.8 | Up   |
| Gm6421     | 351.177 | 0.34563 | 0.16111 | 2.14526 | 0.03193  | 0.09616  | 349.268 | 301.851 | 276.916 | 408.466 | 365.385 | 405.177 | Up   |
| Mprp30     | 1181.02 | -0.2906 | 0.11891 | -2.4436 | 0.01454  | 0.05177  | 1220.99 | 1347.31 | 1330.15 | 1153.86 | 1066.59 | 967.196 | Down |
| Fgf10      | 1186.06 | -0.8257 | 0.15413 | -5.3572 | 8.45E-08 | 1.27E-06 | 1443.51 | 1468.05 | 1637.62 | 859.437 | 996.888 | 710.818 | Down |
| Ccl28      | 367.256 | 2.80515 | 0.29106 | 9.63779 | 5.54E-22 | 5.71E-20 | 110.295 | 110.2   | 55.3832 | 538.056 | 569.198 | 820.407 | Up   |
| Hmgcs1     | 7988.07 | 1.12142 | 0.17509 | 6.40473 | 1.51E-10 | 3.90E-09 | 4797.84 | 5996.78 | 4297.93 | 10111.1 | 13227.8 | 9497.02 | Up   |
| D13Ertdd6C | 4.02092 | -4.3775 | 1.65043 | -2.6523 | 0.00799  | 0.03178  | 10.6425 | 3.83303 | 8.59395 | 0       | 1.05603 | 0       | Down |
| B020031N   | 1.9063  | 4.43085 | 2.12145 | 2.08859 | 0.03674  | NA       | 0       | 0       | 0       | 4.14686 | 5.28013 | 2.0108  | Up   |
| 1700110IC  | 15.1062 | 4.93032 | 1.28314 | 3.84238 | 0.00012  | 0.0009   | 0       | 2.87478 | 0       | 61.1662 | 9.50423 | 17.0918 | Up   |
| Gm26898    | 12.4956 | 4.6463  | 1.06864 | 4.34787 | 1.37E-05 | 0.00013  | 0.9675  | 0       | 1.90977 | 30.0648 | 16.8964 | 25.135  | Up   |
| Gm3618     | 11.0415 | 3.14825 | 0.98909 | 3.18297 | 0.00146  | 0.00766  | 1.935   | 1.91652 | 2.86465 | 5.18358 | 22.1765 | 32.1728 | Up   |
| Gm10251    | 27.819  | 3.75801 | 0.83049 | 4.52505 | 6.04E-06 | 6.26E-05 | 0       | 4.79129 | 6.68418 | 27.9913 | 36.9609 | 90.4861 | Up   |
| Gm10339    | 5.14586 | 3.91509 | 1.44914 | 2.70167 | 0.0069   | 0.0282   | 0       | 1.91652 | 0       | 8.29373 | 11.6163 | 9.04861 | Up   |
| 4933406F   | 10.9774 | 1.96841 | 0.95743 | 2.05593 | 0.03979  | 0.11402  | 0       | 8.62433 | 4.77441 | 17.6242 | 13.7283 | 21.1134 | Up   |
| Flnb       | 6732.79 | 0.24057 | 0.10995 | 2.18803 | 0.02867  | 0.08879  | 6040.11 | 5634.56 | 6843.65 | 7275.67 | 6948.65 | 7654.12 | Up   |
| Dnase1l3   | 233.785 | 1.08349 | 0.27863 | 3.8886  | 0.0001   | 0.00077  | 184.793 | 123.615 | 141.323 | 215.637 | 385.449 | 351.89  | Up   |
| Fam107a    | 2472.97 | -1.1721 | 0.13809 | -8.4883 | 2.10E-17 | 1.47E-15 | 3536.22 | 3695.05 | 3046.08 | 1316.63 | 1560.81 | 1683.04 | Down |
| Fhit       | 393.242 | -0.9975 | 0.23193 | -4.3009 | 1.70E-05 | 0.00016  | 363.781 | 619.993 | 588.208 | 283.023 | 267.174 | 237.275 | Down |
| Sntn       | 2767.07 | -0.7083 | 0.23451 | -3.0204 | 0.00252  | 0.01215  | 3016.67 | 3983.48 | 3299.12 | 2043.37 | 1423.52 | 2836.24 | Down |
| Ngly1      | 3348.96 | -0.2017 | 0.09132 | -2.2087 | 0.0397   | 0.08512  | 3520.74 | 3510.1  | 3717.36 | 2942.2  | 3124.78 | 3278.61 | Down |
| Gm48163    | 48.2295 | -0.7897 | 0.38272 | -2.0635 | 0.03907  | 0.11242  | 56.1151 | 76.6607 | 50.6088 | 40.4319 | 25.3446 | 40.216  | Down |
| Rarb       | 611.544 | -1.3639 | 0.24782 | -5.5035 | 3.72E-08 | 6.03E-07 | 757.554 | 902.68  | 982.574 | 283.023 | 260.838 | 482.592 | Down |
| Thrb       | 1304.98 | -0.3221 | 0.11576 | -2.7826 | 0.00539  | 0.02306  | 1555.74 | 1500.63 | 1293.87 | 1145.57 | 1164.8  | 1169.28 | Down |
| Nid2       | 481.724 | -0.8674 | 0.19763 | -4.3892 | 1.14E-05 | 0.00011  | 547.606 | 748.4   | 571.02  | 277.84  | 366.441 | 379.036 | Down |
| Gng2       | 1159.32 | -0.365  | 0.13539 | -2.696  | 0.00702  | 0.02859  | 1178.42 | 1244.78 | 1492.48 | 991.1   | 967.319 | 1081.81 | Down |
| Saysd1     | 732.982 | -0.3765 | 0.13408 | -2.8083 | 0.00498  | 0.02165  | 796.254 | 776.19  | 911.913 | 681.122 | 582.926 | 649.489 | Down |
| Kcnk5      | 472.568 | -0.4616 | 0.16417 | -2.8114 | 0.00493  | 0.02148  | 550.508 | 508.835 | 583.433 | 411.576 | 332.648 | 448.409 | Down |
| Nudt13     | 1436.44 | -0.385  | 0.11846 | -3.2499 | 0.00115  | 0.00629  | 1457.06 | 1747.86 | 1675.82 | 1249.24 | 1306.3  | 1182.35 | Down |
| Dnajc9     | 1643.41 | 0.27354 | 0.1177  | 2.324   | 0.02013  | 0.06711  | 1593.47 | 1413.43 | 1457.15 | 1850.54 | 1925.13 | 1620.71 | Up   |
| Cfap70     | 1704.82 | -0.7242 | 0.2303  | -3.1447 | 0.00166  | 0.00854  | 1804.39 | 2306.53 | 2261.16 | 1470.06 | 837.428 | 1549.32 | Down |
| Anxa7      | 11070.9 | 0.25598 | 0.08987 | 2.84835 | 0.00439  | 0.01944  | 10351.3 | 9668.83 | 10253.5 | 11710.7 | 12889.8 | 11551.1 | Up   |
| Mss51      | 281.398 | -0.5666 | 0.20961 | -2.7033 | 0.00687  | 0.02809  | 337.658 | 286.519 | 383.863 | 207.343 | 198.533 | 274.474 | Down |
| Myoz1      | 15.532  | -1.3717 | 0.66529 | -2.0618 | 0.03923  | 0.11278  | 17.415  | 25.873  | 23.8721 | 6.2203  | 14.7844 | 5.027   | Down |
| Synpo2l    | 266.826 | -4.755  | 0.87066 | -5.4614 | 4.72E-08 | 7.53E-07 | 304.763 | 985.09  | 253.999 | 16.5875 | 6.33615 | 34.1836 | Down |
| Sec24c     | 423.293 | 0.69645 | 0.19359 | 3.59755 | 0.00032  | 0.00211  | 374.423 | 274.062 | 320.841 | 465.485 | 482.604 | 622.343 | Up   |
| Zswim8     | 6240.69 | 0.21402 | 0.07948 | 2.69268 | 0.00709  | 0.02884  | 5963.68 | 5561.73 | 5810.46 | 6761.46 | 6818.76 | 6528.07 | Up   |
| Camk2g     | 2762.8  | 0.28924 | 0.10804 | 2.67708 | 0.00743  | 0.02991  | 2529.05 | 2436.85 | 2494.15 | 2995.07 | 3350.77 | 2770.88 | Up   |
| Plau       | 522.34  | 0.58345 | 0.1679  | 3.47497 | 0.00051  | 0.00316  | 360.878 | 451.34  | 442.111 | 540.129 | 700.145 | 639.435 | Up   |
| Ap3m1      | 4183.67 | 0.34271 | 0.08804 | 3.89274 | 9.91E-05 | 0.00075  | 3886.45 | 3535.02 | 3645.74 | 4588.5  | 4856.66 | 4589.65 | Up   |
| Adk        | 7980.25 | 0.34683 | 0.11737 | 2.95497 | 0.00313  | 0.01459  | 7899.65 | 6196.1  | 6981.15 | 8742.62 | 8765.01 | 9296.94 | Up   |
| Dusp13     | 26.5671 | 1.46992 | 0.48424 | 3.03549 | 0.0024   | 0.01164  | 14.5125 | 16.2904 | 11.4586 | 41.4686 | 47.5211 | 28.1512 | Up   |
| Samd8      | 2280.36 | 0.30512 | 0.10375 | 2.9409  | 0.00327  | 0.01516  | 1982.41 | 1961.56 | 2176.18 | 2565.87 | 2649.57 | 2346.61 | Up   |
| Vdac2      | 14292.6 | 0.23389 | 0.10972 | 2.13174 | 0.03303  | 0.09864  | 12284.4 | 12284.2 | 12826.9 | 15872.1 | 16407.5 | 14066.6 | Up   |
| A430057N   | 27.8422 | 1.51883 | 0.4522  | 3.35879 | 0.00078  | 0.00454  | 16.4475 | 10.5408 | 16.233  | 38.3585 | 42.241  | 43.2322 | Up   |
| Lrmda      | 781.906 | 0.39478 | 0.13491 | 2.9262  | 0.00343  | 0.0158   | 650.161 | 746.483 | 630.223 | 929.934 | 803.635 | 931.001 | Up   |
| Gm10248    | 17.6549 | 3.49166 | 0.81434 | 4.2877  | 1.81E-05 | 0.00017  | 4.83751 | 2.87478 | 0.95488 | 31.1015 | 16.8964 | 49.2646 | Up   |
| Kcnma1     | 93.3513 | -1.9697 | 0.36075 | -5.46   | 4.76E-08 | 7.58E-07 | 104.49  | 200.276 | 141.323 | 36.2851 | 48.5772 | 29.1566 | Down |
| Gm31392    | 12.2953 | -2.0547 | 0.90684 | -2.2658 | 0.02346  | 0.07576  | 16.4475 | 25.873  | 17.1879 | 6.2203  | 0       | 8.04321 | Down |
| Dlg5       | 186.558 | 0.91479 | 0.26832 | 3.40929 | 0.00065  | 0.00388  | 142.223 | 125.532 | 120.315 | 212.527 | 187.973 | 330.777 | Up   |
| Rps24</    |         |         |         |         |          |          |         |         |         |         |         |         |      |

|           |         |         |         |         |          |          |         |         |         |         |         |         |      |
|-----------|---------|---------|---------|---------|----------|----------|---------|---------|---------|---------|---------|---------|------|
| Appl1     | 3424.47 | -0.2158 | 0.09707 | -2.2231 | 0.02621  | 0.08269  | 3505.26 | 3870.41 | 3664.84 | 2990.93 | 3154.35 | 3361.06 | Down |
| Hesx1     | 21.394  | 1.85203 | 0.60421 | 3.06519 | 0.00218  | 0.01069  | 10.6425 | 11.4991 | 5.7293  | 33.1749 | 20.0645 | 47.2538 | Up   |
| Il17rd    | 1644.87 | -0.2933 | 0.11297 | -2.5959 | 0.00944  | 0.03643  | 1962.09 | 1696.12 | 1776.08 | 1449.33 | 1585.09 | 1400.52 | Down |
| Cacna2d3  | 138.279 | -1.3516 | 0.40318 | -3.3523 | 0.0008   | 0.00462  | 146.093 | 332.516 | 117.451 | 72.5701 | 87.6501 | 73.3943 | Down |
| Cacna1d   | 1499.17 | -0.3355 | 0.147   | -2.2826 | 0.02245  | 0.073    | 1384.49 | 1699.95 | 1933.64 | 1309.37 | 1368.61 | 1298.98 | Down |
| Tkt       | 12877.2 | 0.65374 | 0.14597 | 4.47866 | 7.51E-06 | 7.64E-05 | 10615.4 | 11214.5 | 8195.76 | 15072.8 | 17368.4 | 14796.5 | Up   |
| Prkcd     | 7038.9  | 0.42534 | 0.11063 | 3.84464 | 0.00012  | 0.0009   | 6092.36 | 5545.44 | 6388.17 | 8328.98 | 8581.26 | 7297.2  | Up   |
| Rft1      | 1339.9  | 0.3158  | 0.11834 | 2.66856 | 0.00762  | 0.03055  | 1247.11 | 1282.15 | 1052.28 | 1483.54 | 1496.39 | 1477.94 | Up   |
| Sfmbt1    | 1424.72 | 0.30399 | 0.13317 | 2.28269 | 0.02245  | 0.073    | 1400.94 | 1155.66 | 1269.04 | 1406.82 | 1594.6  | 1721.25 | Up   |
| Stimate   | 3129.92 | 0.6633  | 0.10923 | 6.07232 | 1.26E-09 | 2.75E-08 | 2678.04 | 2259.57 | 2330.87 | 3668.94 | 4025.57 | 3816.5  | Up   |
| Itih4     | 6260.02 | 1.56948 | 0.72041 | 2.17858 | 0.02936  | 0.09044  | 3269.19 | 3917.36 | 2279.31 | 6511.61 | 3475.38 | 18107.3 | Up   |
| Itih1     | 243.416 | 1.95486 | 0.41769 | 4.68013 | 2.87E-06 | 3.20E-05 | 104.49  | 68.9946 | 126.045 | 301.684 | 202.757 | 656.527 | Up   |
| Glt8d1    | 3291.15 | -0.3851 | 0.09774 | -3.9401 | 8.14E-05 | 0.00063  | 3589.43 | 3834.95 | 3759.37 | 2806.39 | 2681.25 | 3075.52 | Down |
| Smim4     | 353.457 | -0.9309 | 0.15278 | -6.0934 | 1.11E-09 | 2.43E-08 | 458.596 | 426.425 | 506.088 | 229.114 | 248.166 | 252.356 | Down |
| Nt5dc2    | 1936.73 | -0.8857 | 0.20182 | -4.3888 | 1.14E-05 | 0.00011  | 3123.09 | 2224.12 | 2192.41 | 1522.94 | 1512.23 | 1045.62 | Down |
| Stab1     | 3869.49 | -0.3266 | 0.13631 | -2.3958 | 0.01658  | 0.05753  | 4087.69 | 3912.57 | 4916.69 | 3505.14 | 3048.75 | 3746.12 | Down |
| Sema3g    | 6437.92 | -0.6193 | 0.20686 | -2.9938 | 0.00276  | 0.01308  | 5860.16 | 7015.41 | 10520.9 | 4629.97 | 5455.43 | 5145.64 | Down |
| Dnah1     | 1516.71 | -0.9596 | 0.19965 | -4.8065 | 1.54E-06 | 1.82E-05 | 1758.92 | 2217.41 | 2033.9  | 1091.66 | 747.666 | 1250.72 | Down |
| Capn7     | 401.857 | 0.85913 | 0.19825 | 4.33352 | 1.47E-05 | 0.00014  | 333.788 | 256.813 | 266.412 | 482.073 | 446.699 | 625.359 | Up   |
| Sh3bp5    | 4213.61 | -0.5736 | 0.15311 | -3.7463 | 0.00018  | 0.00127  | 4497.91 | 5097.94 | 5524.95 | 3179.61 | 4042.47 | 2938.79 | Down |
| Mettl6    | 1642.32 | -0.3295 | 0.14466 | -2.2779 | 0.02273  | 0.07381  | 1692.16 | 1786.19 | 2009.07 | 1402.68 | 1276.73 | 1687.06 | Down |
| Colq      | 1188.5  | -1.8277 | 0.25777 | -7.0902 | 1.34E-12 | 4.74E-11 | 1653.46 | 2071.76 | 1838.15 | 669.718 | 589.262 | 308.658 | Down |
| Galnt15   | 1153.87 | -1.5658 | 0.21324 | -7.3429 | 2.09E-13 | 8.41E-12 | 1669.91 | 2037.26 | 1467.66 | 646.911 | 683.248 | 418.247 | Down |
| Dph3      | 1550.03 | -0.3008 | 0.11238 | -2.6766 | 0.00744  | 0.02994  | 1552.84 | 1712.41 | 1867.75 | 1421.34 | 1386.56 | 1359.3  | Down |
| Oxnad1    | 693.567 | -0.4485 | 0.17618 | -2.5458 | 0.0109   | 0.04105  | 714.984 | 935.26  | 751.493 | 563.973 | 509.004 | 686.689 | Down |
| Ncoa4     | 1712.11 | 0.68435 | 0.16569 | 4.13037 | 3.62E-05 | 0.00031  | 1543.16 | 1215.07 | 1182.15 | 1912.74 | 2491.16 | 1928.36 | Up   |
| Ogdhl     | 90.4992 | -1.7558 | 0.56234 | -3.1224 | 0.00179  | 0.0091   | 51.2776 | 275.978 | 91.6688 | 44.5788 | 43.297  | 36.1944 | Down |
| 1700024G  | 1009.01 | -1.2652 | 0.22634 | -5.5901 | 2.27E-08 | 3.83E-07 | 1309.03 | 1566.75 | 1399.86 | 634.47  | 393.897 | 750.029 | Down |
| 3425401B  | 85.0349 | -1.0476 | 0.4898  | -2.1389 | 0.03244  | 0.09722  | 110.295 | 183.027 | 50.6088 | 45.6155 | 42.241  | 78.4213 | Down |
| Tmem273   | 347.405 | 1.51317 | 0.20701 | 7.30953 | 2.68E-13 | 1.06E-11 | 191.565 | 181.111 | 168.059 | 448.898 | 648.4   | 446.398 | Up   |
| Vstrn4    | 1526.12 | -0.5499 | 0.20897 | -2.6315 | 0.0085   | 0.03341  | 1358.37 | 2104.34 | 1977.56 | 1180.82 | 1510.12 | 1025.51 | Down |
| Wdfy4     | 2011.31 | 1.05231 | 0.19935 | 5.27876 | 1.30E-07 | 1.89E-06 | 1644.75 | 1077.08 | 1204.11 | 2495.38 | 3296.91 | 2349.62 | Up   |
| Arhgap22  | 289.265 | 0.92774 | 0.28922 | 3.20772 | 0.00134  | 0.00713  | 203.175 | 123.615 | 271.187 | 321.382 | 437.195 | 379.036 | Up   |
| A630023A  | 24.4975 | 2.29228 | 0.64744 | 3.54051 | 0.0004   | 0.00255  | 1.935   | 12.4574 | 10.5037 | 32.1382 | 51.7452 | 38.2052 | Up   |
| Rpl23a-ps | 1304.25 | -0.3693 | 0.17248 | -2.1408 | 0.03229  | 0.09686  | 1495.76 | 1221.78 | 1693.01 | 1148.68 | 1302.08 | 964.179 | Down |
| Glud1     | 12749.8 | 0.25431 | 0.10347 | 2.45783 | 0.01398  | 0.05022  | 12498.2 | 11224.1 | 11164.5 | 13745.8 | 14985   | 12881.2 | Up   |
| Ldb3      | 1789.92 | -4.5742 | 0.67238 | -6.803  | 1.02E-11 | 3.19E-10 | 2067.55 | 6423.21 | 1816.19 | 129.589 | 91.8742 | 211.134 | Down |
| Lrit2     | 3.36821 | 5.2546  | 2.46025 | 2.1358  | 0.0327   | 0.09783  | 0       | 0       | 0       | 0       | 2.11205 | 18.0972 | Up   |
| Cdhr1     | 1948.84 | 3.30155 | 0.85553 | 3.85907 | 0.00011  | 0.00085  | 208.013 | 750.317 | 118.405 | 3120.51 | 1940.97 | 5554.84 | Up   |
| Tspan14   | 4772.13 | 0.37419 | 0.10698 | 3.49793 | 0.00047  | 0.00294  | 4049.96 | 3991.15 | 4428.75 | 5257.19 | 5896.85 | 5008.91 | Up   |
| Prxl2a    | 3375.78 | -0.4176 | 0.16706 | -2.4997 | 0.01243  | 0.04567  | 3130.83 | 4495.19 | 3957.03 | 3116.37 | 2462.65 | 3092.61 | Down |
| Dydc1     | 133.759 | -0.8898 | 0.3278  | -2.7145 | 0.00664  | 0.02728  | 174.15  | 177.278 | 169.969 | 105.745 | 51.7452 | 123.664 | Down |
| Mat1a     | 1721.63 | 1.01277 | 0.25763 | 3.93105 | 8.46E-05 | 0.00065  | 1187.12 | 988.923 | 1247.08 | 2178.14 | 1471.04 | 3257.5  | Up   |
| Sftpa1    | 211905  | 0.91799 | 0.1577  | 5.82095 | 5.85E-09 | 1.12E-07 | 178407  | 125519  | 136095  | 266922  | 254067  | 310422  | Up   |
| Sftpd     | 88511.5 | 2.05954 | 0.15841 | 13.001  | 1.21E-38 | 5.21E-36 | 42643.6 | 28132.6 | 31974.3 | 142971  | 143770  | 141577  | Up   |
| Gm5930    | 81.7375 | -1.7793 | 0.6108  | -2.9131 | 0.00358  | 0.01636  | 247.68  | 92.9511 | 39.1502 | 52.8725 | 30.6247 | 27.1458 | Down |
| Gm8229    | 90.8736 | -1.3077 | 0.54721 | -2.3898 | 0.01686  | 0.05834  | 254.453 | 68.9946 | 64.932  | 68.4232 | 41.185  | 47.2538 | Down |
| AC160336  | 605.425 | -1.8031 | 0.37172 | -4.8506 | 1.23E-06 | 1.48E-05 | 1433.84 | 603.703 | 785.869 | 416.76  | 215.429 | 176.951 | Down |
| Gm8267    | 66.2114 | -5.081  | 1.92401 | -2.6408 | 0.00827  | 0.0327   | 214.785 | 44.0799 | 126.999 | 11.4039 | 0       | 0       | Down |
| Gm34060   | 25.8076 | -5.6226 | 1.16984 | -4.8063 | 1.54E-06 | 1.82E-05 | 68.6926 | 8.62433 | 74.4809 | 1.03672 | 0       | 2.0108  | Down |
| Ero1l     | 2847.44 | 0.47683 | 0.12443 | 3.83222 | 0.00013  | 0.00094  | 2643.21 | 2085.17 | 2414.9  | 3385.91 | 3464.82 | 3090.6  | Up   |
| Gm15601   | 111.709 | 1.16595 | 0.26001 | 4.48425 | 7.32E-06 | 7.46E-05 | 87.0751 | 64.2033 | 55.3832 | 151.361 | 158.404 | 153.826 | Up   |
| Ddh1d1    | 2501.2  | 1.52199 | 0.10537 | 14.4442 | 2.73E-47 | 2.10E-44 | 1341.92 | 1284.07 | 1249.94 | 3441.9  | 4027.68 | 3661.67 | Up   |
| A530076l  | 45.9119 | 0.98999 | 0.38223 | 2.59002 | 0.0096   | 0.03693  | 34.8301 | 29.706  | 27.6916 | 47.6889 | 80.2579 | 55.297  | Up   |
| Bmp4      | 3411.26 | 0.5198  | 0.20431 | 2.54421 | 0.01095  | 0.04119  | 3214.04 | 2484.76 | 2710.91 | 3958.18 | 5141.79 | 2957.89 | Up   |
| Cdkn3     | 62.9704 | 0.76251 | 0.34913 | 2.18403 | 0.02896  | 0.08952  | 36.7651 | 55.579  | 47.7441 | 102.635 | 70.7537 | 64.3457 | Up   |
| Gmfb      | 10297.9 | 0.29214 | 0.09826 | 2.97325 | 0.00295  | 0.01386  | 9746.61 | 8560.12 | 9469.57 | 10612.9 | 11708.2 | 11689.8 | Up   |
| Gm34934   | 212.884 | -0.7528 | 0.19611 | -3.8387 | 0.00012  | 0.00091  | 239.94  | 278.853 | 282.645 | 151.361 | 183.748 | 140.756 | Down |
| Gch1      | 3071.49 | 1.45111 | 0.09556 | 15.1848 | 4.46E-52 | 5.34E-49 | 1697.97 | 1674.08 | 1563.14 | 4292    | 4766.9  | 4434.82 | Up   |
| Wdh1d1    | 318.774 | 0.55573 | 0.18857 | 2.94712 | 0.00321  | 0.01492  | 294.12  | 275.02  | 205.3   | 400.172 | 357.993 | 380.042 | Up   |
| Lgals3    | 11770.1 | 1.13398 | 0.19804 | 5.72592 | 1.03E-08 | 1.86E-07 | 9381.86 | 6316.84 | 6407.26 | 16572.9 | 18983.1 | 12958.6 | Up   |
| Dlgap5    | 103.469 | 0.84599 | 0.28772 | 2.94036 | 0.00328  | 0.01518  | 84.1726 | 84.3268 | 53.4734 | 115.075 | 130.947 | 152.821 | Up   |
| Fbxo34    | 1603.52 | 0.50175 | 0.10684 | 4.69609 | 2.65E-06 | 2.98E-05 | 1352.57 | 1322.4  | 1307.23 | 1975.98 | 1955.76 | 1707.17 | Up   |
| Ktn1      | 5528.52 | -0.4207 | 0.10952 | -3.8414 | 0.00012  | 0.00091  | 6031.4  | 6991.46 | 5964.2  | 4624.79 | 4507.12 | 5052.14 | Down |
| Peli2     | 1539.98 | -0.5969 | 0.10484 | -5.6934 | 1.25E-08 | 2.21E-07 | 1782.14 | 1784.28 | 1995.71 | 1268.94 | 1234.49 | 1174.31 | Down |
| Gm18962   | 2.40054 | -4.6599 | 1.92551 | -2.4201 | 0.01552  | 0.0545   | 4.83751 | 4.79129 | 4.77441 | 0       | 0       | 0       | Down |
| Gm48935   | 1.88299 | 4.41505 | 2.21569 | 1.99262 | 0.0463   | NA       | 0       | 0       | 0       | 6.2203  | 1.05603 | 4.0216  | Up   |
| ccdc198   | 72.3228 | 4.21976 | 0.50896 | 8.29098 | 1.12E-16 | 7.06E-15 | 10.6425 | 7.66607 | 3.81953 | 188.682 | 82.37   | 140.756 | Up   |
| Tlr11     | 47.7823 | 0.8384  | 0.35302 | 2.37495 | 0.01755  | 0.06015  | 41.6026 | 35.4556 | 25.7818 | 58.0561 | 65.4736 | 60.3241 | Up   |
| Tep1      | 2487.21 | 0.52559 | 0.10895 | 4.82411 | 1.41E-06 | 1.68E-05 | 1978.54 | 2228.91 | 1909.77 | 2801.21 | 3116.33 | 2888.52 | Up   |
| Gm26782   | 443.47  | 0.45489 | 0.14122 | 3.22115 | 0.00128  | 0.00686  | 357.008 | 409.176 | 356.171 | 479.999 | 504.685 | 517.781 | Up   |
| Klhl33    | 102.79  | -0.8203 | 0.32977 | -2.4876 | 0.01286  | 0.04694  | 141.255 | 153.321 | 99.3078 | 61.1662 | 59.1374 | 102.551 | Down |
| Apex1     | 222.618 | 0.81947 | 0.17321 | 4.73123 | 2.23E-06 | 2.54E-05 | 169.313 | 158.113 | 155.646 | 274.73  | 310.471 | 267.437 | Up   |
| Rnase4    | 43833.1 | 0.95843 | 0.15967 | 6.00247 | 1.94E-09 | 4.04E-08 | 35625.3 | 27029.6 | 26703.3 | 63085.2 | 61817.6 | 48737.8 | Up   |
| Rnase1    | 8.41148 | 2.4812  | 1.10003 | 2.25557 | 0.0241   | 0.07734  | 1.935   | 1.91652 | 3.81953 | 15.5507 | 2.11205 | 25.135  | Up   |
| Rnase2b   | 24.7987 | 4.19698 | 0.7609  | 5.51585 | 3.47E-08 | 5.64E-07 | 5.80501 | 0       | 1.90977 | 51.8358 | 36.9609 | 52.2808 | Up   |
| Gm7107    | 77.1791 | 0.77275 | 0.26414 | 2.92555 | 0.00344  | 0.01583  | 62.8876 | 56.5373 | 51.5637 |         |         |         |      |



|          |         |         |         |         |          |          |         |         |         |         |         |         |      |
|----------|---------|---------|---------|---------|----------|----------|---------|---------|---------|---------|---------|---------|------|
| Rhobtb2  | 995.368 | -0.3312 | 0.10721 | -3.089  | 0.00201  | 0.01001  | 1060.38 | 1109.66 | 1157.32 | 920.604 | 838.484 | 885.758 | Down |
| Egr3     | 221.418 | 0.74932 | 0.2618  | 2.86222 | 0.00421  | 0.01875  | 151.898 | 208.9   | 134.638 | 270.583 | 345.32  | 217.167 | Up   |
| Bin3     | 1638.6  | 0.21302 | 0.09541 | 2.23253 | 0.02558  | 0.08108  | 1560.58 | 1442.18 | 1550.73 | 1812.18 | 1768.84 | 1697.12 | Up   |
| Pdlm2    | 7799.69 | -0.4152 | 0.14071 | -2.9506 | 0.00317  | 0.01478  | 9615.03 | 7868.26 | 9259.5  | 7584.61 | 6726.88 | 5743.86 | Down |
| Sorbs3   | 15015.1 | -0.8461 | 0.13023 | -6.4975 | 8.17E-11 | 2.19E-09 | 17468.2 | 17764.2 | 22656.5 | 11241.1 | 10257.2 | 10703.5 | Down |
| Gm49417  | 330.204 | -0.5314 | 0.16597 | -3.2017 | 0.00137  | 0.00726  | 374.423 | 369.888 | 426.833 | 283.023 | 235.494 | 291.566 | Down |
| Phyhip   | 52.9764 | -1.2519 | 0.41525 | -3.0149 | 0.00257  | 0.01234  | 80.3026 | 91.0346 | 52.5186 | 44.5788 | 24.2886 | 25.135  | Down |
| Bmp1     | 7760.24 | 1.17561 | 0.11164 | 10.5304 | 6.26E-26 | 9.12E-24 | 4442.77 | 5065.36 | 4779.19 | 10514.4 | 11867.6 | 9892.14 | Up   |
| Sftpc    | 1018493 | 1.10725 | 0.15674 | 7.06419 | 1.62E-12 | 5.64E-11 | 762454  | 510364  | 664492  | 1498180 | 1332686 | 1342780 | Up   |
| Lgi3     | 11855.9 | 0.72427 | 0.1641  | 4.41362 | 1.02E-05 | 9.94E-05 | 11054.7 | 7066.2  | 8701.85 | 15143.3 | 14673.5 | 14495.9 | Up   |
| Reep4    | 2251.3  | 0.5677  | 0.12257 | 4.63181 | 3.62E-06 | 3.96E-05 | 1683.45 | 1852.31 | 1905.95 | 2728.64 | 2952.65 | 2384.81 | Up   |
| Hr       | 366.602 | -0.6233 | 0.29094 | -2.1423 | 0.03217  | 0.09663  | 276.705 | 533.75  | 523.276 | 213.563 | 331.592 | 320.723 | Down |
| Nudt18   | 1348.66 | 0.26308 | 0.10672 | 2.46524 | 0.01369  | 0.0494   | 1254.85 | 1233.28 | 1189.78 | 1514.64 | 1548.13 | 1351.26 | Up   |
| Fam160b2 | 1274.47 | 0.31641 | 0.11144 | 2.83916 | 0.00452  | 0.01995  | 1232.6  | 1066.54 | 1106.71 | 1486.65 | 1373.89 | 1380.42 | Up   |
| Dmtn     | 916.992 | -0.7653 | 0.10868 | -7.0417 | 1.90E-12 | 6.54E-11 | 1117.46 | 1137.45 | 1208.88 | 694.6   | 699.089 | 644.462 | Down |
| Gfra2    | 920.929 | -0.7304 | 0.18311 | -3.9889 | 6.64E-05 | 0.00053  | 905.581 | 1330.06 | 1211.75 | 706.003 | 771.955 | 600.224 | Down |
| Fndc3a   | 5242.99 | 0.48172 | 0.08587 | 5.61007 | 2.02E-08 | 3.44E-07 | 4514.36 | 4314.08 | 4298.88 | 5904.1  | 5971.82 | 6454.67 | Up   |
| Rcbtb2   | 1265.89 | 0.56303 | 0.14325 | 3.9304  | 8.48E-05 | 0.00066  | 1178.42 | 1026.3  | 861.304 | 1486.65 | 1475.27 | 1567.42 | Up   |
| Rb1      | 413.616 | 0.40766 | 0.19066 | 2.13818 | 0.0325   | 0.09732  | 445.051 | 294.185 | 327.525 | 468.596 | 466.763 | 479.576 | Up   |
| Sucla2   | 4850.65 | -0.4613 | 0.13749 | -3.3553 | 0.00079  | 0.00458  | 5104.54 | 6677.15 | 5077.11 | 3917.75 | 4027.57 | 4056.79 | Down |
| Lrch1    | 3369.31 | 0.28256 | 0.13544 | 2.08623 | 0.03696  | 0.10779  | 3539.12 | 2686    | 2896.16 | 3448.12 | 3930.53 | 3715.96 | Up   |
| Lcp1     | 16178   | 1.45182 | 0.17966 | 8.08094 | 6.43E-16 | 3.71E-14 | 10810.9 | 7928.63 | 7245.65 | 20589.2 | 27544.3 | 22949.3 | Up   |
| Gtf2f2   | 1188.24 | 0.28412 | 0.11926 | 2.38228 | 0.01721  | 0.05922  | 1146.49 | 1074.21 | 994.033 | 1365.35 | 1355.94 | 1193.41 | Up   |
| Tsc22d1  | 21513.5 | -0.4263 | 0.11974 | -3.56   | 0.00037  | 0.00239  | 22256.4 | 27528.9 | 24221.6 | 20061.5 | 17668.4 | 17344.2 | Down |
| Serp2    | 72.2791 | -1.06   | 0.31018 | -3.4175 | 0.00063  | 0.00378  | 113.198 | 99.6589 | 80.2102 | 39.3952 | 55.9693 | 45.243  | Down |
| Lacc1    | 873.042 | 1.24959 | 0.16543 | 7.55365 | 4.23E-14 | 1.90E-12 | 508.906 | 598.912 | 443.066 | 1069.89 | 1246.11 | 1371.37 | Up   |
| Ccdc122  | 637.463 | 1.26382 | 0.18094 | 6.98484 | 2.85E-12 | 9.51E-11 | 369.586 | 448.465 | 306.517 | 968.293 | 788.851 | 943.066 | Up   |
| Epsti1   | 1652.38 | 1.58118 | 0.15787 | 10.0156 | 1.30E-23 | 1.54E-21 | 822.376 | 983.173 | 677.967 | 2565.87 | 2281.01 | 2583.88 | Up   |
| Tnfsf11  | 29.0261 | 1.09207 | 0.4999  | 2.1846  | 0.02892  | 0.08943  | 9.67501 | 25.873  | 20.0525 | 43.5421 | 33.7928 | 41.2214 | Up   |
| Dgkh     | 4027.47 | -0.5546 | 0.16414 | -3.3785 | 0.00073  | 0.00427  | 3853.56 | 5179.39 | 5343.52 | 2804.32 | 3366.61 | 3617.43 | Down |
| Vwa8     | 2425.38 | -0.2372 | 0.12001 | -1.9763 | 0.04812  | 0.13245  | 2738.03 | 2832.61 | 2302.22 | 2351.27 | 2199.7  | 2128.43 | Down |
| Rgcc     | 9104.69 | -0.9385 | 0.20588 | -4.5586 | 5.15E-06 | 5.43E-05 | 12817.5 | 11618.9 | 11461.5 | 7724.57 | 6787.08 | 4218.66 | Down |
| Elf1     | 5792.06 | 0.20158 | 0.07391 | 2.72742 | 0.00638  | 0.0265   | 5376.41 | 5317.38 | 5470.52 | 6197.49 | 6082.71 | 6307.89 | Up   |
| Ofm4     | 243.126 | 3.88683 | 0.47081 | 8.25559 | 1.51E-16 | 9.34E-15 | 49.3426 | 27.7895 | 15.2781 | 713.261 | 221.765 | 431.317 | Up   |
| Pcdh17   | 1308.99 | 0.36997 | 0.16135 | 2.29301 | 0.02185  | 0.07149  | 1357.4  | 954.426 | 1114.35 | 1374.69 | 1629.45 | 1423.65 | Up   |
| Rps3a2   | 7125.98 | -0.8593 | 0.22088 | -3.8906 | 1.00E-04 | 0.00076  | 9122.57 | 7874.97 | 10565.8 | 4010.02 | 4204.04 | 6978.49 | Down |
| Gm33203  | 3.08248 | 5.12607 | 1.85236 | 2.76732 | 0.00565  | 0.02401  | 0       | 0       | 0       | 3.11015 | 6.33615 | 9.04861 | Up   |
| Pcdh9    | 49.8068 | -1.2643 | 0.51195 | -2.4695 | 0.01353  | 0.04893  | 36.7651 | 120.741 | 53.4734 | 25.9179 | 33.7928 | 28.1512 | Down |
| Klhl1    | 35.1195 | 2.65623 | 0.71898 | 3.69443 | 0.00022  | 0.00151  | 15.48   | 8.62433 | 4.77441 | 68.4232 | 16.8964 | 96.5185 | Up   |
| Dach1    | 2156.98 | -0.3164 | 0.12172 | -2.5996 | 0.00933  | 0.03611  | 2256.21 | 2389.9  | 2531.39 | 2135.63 | 1913.52 | 1715.21 | Down |
| Bora     | 440.562 | -0.4205 | 0.13629 | -3.085  | 0.00204  | 0.01011  | 482.783 | 523.209 | 507.043 | 352.483 | 370.665 | 407.187 | Down |
| Gm41230  | 259.789 | -4.1793 | 0.24194 | -17.274 | 7.39E-67 | 1.99E-63 | 440.213 | 544.291 | 492.72  | 32.1382 | 23.2326 | 26.1404 | Down |
| Kctd12   | 6048.28 | 0.21807 | 0.08317 | 2.6221  | 0.00874  | 0.03418  | 5418.98 | 5584.73 | 5772.27 | 6252.43 | 6775.46 | 6485.84 | Up   |
| Cln5     | 3752.59 | 0.47267 | 0.13652 | 3.46226 | 0.00054  | 0.00328  | 3662.96 | 2821.11 | 2945.81 | 4152.05 | 4753.17 | 4180.46 | Up   |
| Fbxl3    | 7427.22 | -0.236  | 0.09215 | -2.5614 | 0.01042  | 0.03958  | 7426.54 | 8279.35 | 8394.38 | 6588.33 | 6904.29 | 6970.44 | Down |
| Gm34907  | 335.782 | 1.03532 | 0.27502 | 3.76457 | 0.00017  | 0.00119  | 303.795 | 193.568 | 163.285 | 388.768 | 568.142 | 397.133 | Up   |
| Ednrb    | 3643.77 | -0.8839 | 0.1056  | -8.3697 | 5.78E-17 | 3.80E-15 | 4808.48 | 4368.7  | 5001.68 | 2372.01 | 2689.7  | 2622.09 | Down |
| Ndfip2   | 3940.92 | 0.28674 | 0.10401 | 2.75689 | 0.00584  | 0.02464  | 3449.14 | 3687.38 | 3514.92 | 4288.89 | 4727.83 | 3977.37 | Up   |
| 9330188P | 80.7583 | -2.5293 | 0.50088 | -5.0496 | 4.43E-07 | 5.90E-06 | 147.06  | 117.866 | 148.007 | 7.25701 | 42.241  | 22.1188 | Down |
| Mir17hg  | 433.68  | -0.947  | 0.19283 | -4.9109 | 9.07E-07 | 1.13E-05 | 562.118 | 461.881 | 689.425 | 302.721 | 268.23  | 317.707 | Down |
| Gpc6     | 76.7954 | -1.2338 | 0.37548 | -3.286  | 0.00102  | 0.00565  | 93.8476 | 121.699 | 107.902 | 42.5053 | 27.4567 | 67.3619 | Down |
| Abcc4    | 1430.73 | 1.03246 | 0.17328 | 5.95829 | 2.55E-09 | 5.21E-08 | 929.769 | 1143.2  | 745.764 | 1747.9  | 2017.01 | 2000.75 | Up   |
| Cldn10   | 2038.56 | -1.1925 | 0.27448 | -4.3445 | 1.40E-05 | 0.00013  | 2747.7  | 2751.16 | 3009.79 | 1680.52 | 675.856 | 1366.34 | Down |
| Dzip1    | 830.678 | -0.7175 | 0.23001 | -3.1196 | 0.00181  | 0.00917  | 1043.93 | 1015.75 | 1039.87 | 654.168 | 413.962 | 816.386 | Down |
| Dnajc3   | 13523.3 | 0.30005 | 0.08202 | 3.65827 | 0.00025  | 0.00171  | 11856.7 | 11804.8 | 12704.7 | 14340.9 | 15316.6 | 15116.2 | Up   |
| Gm49768  | 92.9539 | -0.6511 | 0.30105 | -2.1629 | 0.03055  | 0.093    | 93.8476 | 141.822 | 105.037 | 89.1576 | 66.5296 | 61.3295 | Down |
| Uggt2    | 411.044 | -0.3821 | 0.14037 | -2.7221 | 0.00649  | 0.0268   | 479.881 | 460.922 | 454.524 | 354.557 | 388.617 | 327.761 | Down |
| Gm4681   | 14.5635 | -2.2233 | 0.76106 | -2.9213 | 0.00349  | 0.01602  | 19.35   | 38.3303 | 14.3232 | 3.11015 | 4.2241  | 8.04321 | Down |
| Rap2a    | 6367.85 | 0.36315 | 0.12397 | 2.92931 | 0.0034   | 0.01567  | 6380.67 | 4951.32 | 5379.81 | 7093.21 | 7544.25 | 6857.84 | Up   |
| Gm49008  | 2.55758 | -4.7515 | 1.90569 | -2.4933 | 0.01266  | 0.04632  | 3.87001 | 4.79129 | 6.68418 | 0       | 0       | 0       | Down |
| Stk24    | 3735.73 | 0.28257 | 0.11572 | 2.44178 | 0.01462  | 0.05198  | 3594.27 | 3174.71 | 3344    | 3894.94 | 4578.93 | 3827.56 | Up   |
| Slc15a1  | 192.999 | 0.94972 | 0.24582 | 3.86355 | 0.00011  | 0.00084  | 172.215 | 101.575 | 121.27  | 231.188 | 270.342 | 261.404 | Up   |
| Gm49035  | 23.1402 | -1.9487 | 0.71508 | -2.7252 | 0.00643  | 0.02662  | 29.025  | 48.8712 | 32.466  | 4.14686 | 4.2241  | 20.108  | Down |
| Dock9    | 11430.9 | -0.2436 | 0.09865 | -2.4692 | 0.01354  | 0.04897  | 11885.8 | 11708   | 13587   | 10702   | 10071.3 | 10631.1 | Down |
| 1810041H | 39.7118 | -0.8358 | 0.40938 | -2.0416 | 0.04119  | 0.11721  | 60.9526 | 34.4973 | 57.293  | 26.9546 | 26.4006 | 32.1728 | Down |
| Timm8a2  | 2.5722  | -3.6975 | 1.80434 | -2.0492 | 0.04044  | 0.11552  | 4.83751 | 2.87478 | 6.68418 | 1.03672 | 0       | 0       | Down |
| Pcca     | 1578.76 | -0.3069 | 0.11677 | -2.6282 | 0.00858  | 0.03368  | 1731.83 | 1928.02 | 1578.42 | 1418.23 | 1362.27 | 1453.81 | Down |
| Fgf14    | 120.849 | -1.1577 | 0.34019 | -3.4031 | 0.00067  | 0.00396  | 122.873 | 196.443 | 181.428 | 97.4513 | 46.4651 | 80.4321 | Down |
| Ccdc152  | 1119.87 | -0.5057 | 0.12101 | -4.179  | 2.93E-05 | 0.00026  | 1265.49 | 1460.39 | 1216.52 | 961.036 | 924.022 | 891.791 | Down |
| Ghr      | 6056.54 | -0.3935 | 0.1237  | -3.1811 | 0.00147  | 0.0077   | 6247.16 | 7788.73 | 6596.33 | 4902.63 | 5669.8  | 5134.58 | Down |
| Fbxo4    | 1836.71 | 0.64552 | 0.11277 | 5.72398 | 1.04E-08 | 1.87E-07 | 1490.92 | 1481.47 | 1325.38 | 2269.37 | 2059.25 | 2393.86 | Up   |
| Plcx3    | 55.273  | -1.1641 | 0.35446 | -3.2841 | 0.00102  | 0.00568  | 56.1151 | 88.1598 | 84.9846 | 32.1382 | 39.0729 | 31.1674 | Down |
| C6       | 9474.43 | 1.49512 | 0.11958 | 12.5029 | 7.20E-36 | 2.46E-33 | 4854.92 | 5336.54 | 4694.2  | 12211.5 | 14882.6 | 14866.9 | Up   |
| C7       | 8873.68 | 0.31275 | 0.1247  | 2.50809 | 0.01214  | 0.0448   | 8654.3  | 7533.83 | 7558.85 | 8610.96 | 10023.8 | 10860.3 | Up   |
| Rpl37    | 4240.03 | -0.412  | 0.14519 | -2.8373 | 0.00455  | 0.02003  | 5281.59 | 4027.56 | 5214.62 | 3739.43 | 3930.53 | 3246.44 | Down |
| Prkaa1   | 198.072 | 0.49823 | 0.20396 | 2.44283 | 0.01457  | 0.05187  | 180.923 | 137.031 | 174.744 | 218.747 | 218.597 | 258.388 | Up   |
| Ptger4   | 1058.73 | 0.42988 | 0.13837 | 3.10678 | 0.00189  | 0.00952  | 923.964 | 954.426 | 827.883 |         |         |         |      |

|           |         |         |         |         |          |          |         |         |         |         |         |         |      |
|-----------|---------|---------|---------|---------|----------|----------|---------|---------|---------|---------|---------|---------|------|
| Slc1a3    | 2459.28 | 0.69342 | 0.1883  | 3.68244 | 0.00023  | 0.00157  | 2152.69 | 1632.87 | 1852.47 | 2679.91 | 3861.88 | 2575.84 | Up   |
| Lmbrd2    | 3087.37 | 0.37869 | 0.0886  | 4.27408 | 1.92E-05 | 0.00017  | 2623.86 | 2686    | 2743.38 | 3424.27 | 3688.7  | 3358.04 | Up   |
| Capsl     | 2094.97 | 0.67371 | 0.16499 | 4.08325 | 4.44E-05 | 0.00037  | 1588.64 | 1853.27 | 1401.77 | 2830.23 | 2109.94 | 2785.97 | Up   |
| Rad1      | 763.683 | -0.3567 | 0.13071 | -2.7292 | 0.00635  | 0.02638  | 902.679 | 795.355 | 874.673 | 640.69  | 741.33  | 627.37  | Down |
| C1qtnf3   | 109.37  | -0.5068 | 0.24614 | -2.0588 | 0.03951  | 0.11342  | 148.028 | 114.033 | 123.18  | 88.1208 | 81.314  | 101.545 | Down |
| Adamts12  | 131.719 | -1.1316 | 0.34962 | -3.2366 | 0.00121  | 0.00654  | 99.6527 | 246.272 | 196.706 | 83.974  | 80.2579 | 83.4483 | Down |
| Npr3      | 6344.99 | -2.0505 | 0.43812 | -4.6804 | 2.86E-06 | 3.20E-05 | 5149.04 | 10237.1 | 15281   | 2025.74 | 2898.79 | 2478.31 | Down |
| Mtmr12    | 3372.37 | -0.2478 | 0.0949  | -2.6111 | 0.00903  | 0.03506  | 3632.97 | 3879.03 | 3471.95 | 3119.48 | 2932.58 | 3198.18 | Down |
| Golph3    | 9629.82 | 0.22344 | 0.0717  | 3.11614 | 0.00183  | 0.00926  | 8777.17 | 8809.27 | 9070.43 | 10307   | 10260.3 | 10554.7 | Up   |
| Pdzd2     | 16599.1 | -0.4634 | 0.15875 | -2.9188 | 0.00351  | 0.01612  | 17540.8 | 18100.5 | 22084.5 | 11887   | 16668.3 | 13313.5 | Down |
| Otulinl   | 2103.67 | 0.51183 | 0.1148  | 4.45851 | 8.25E-06 | 8.29E-05 | 1761.82 | 1822.61 | 1618.53 | 2576.24 | 2617.89 | 2224.95 | Up   |
| Dnah5     | 4169.1  | -0.7259 | 0.29508 | -2.4602 | 0.01389  | 0.04997  | 4427.29 | 6679.06 | 4483.18 | 2927.69 | 1855.44 | 4641.94 | Down |
| Dap       | 6172.41 | 0.65453 | 0.13328 | 4.91095 | 9.06E-07 | 1.13E-05 | 4871.37 | 4689.72 | 4825.98 | 7648.89 | 8660.46 | 6338.05 | Up   |
| Ankrd33b  | 4166.03 | -0.6164 | 0.14361 | -4.2924 | 1.77E-05 | 0.00016  | 4362.46 | 4990.61 | 5775.13 | 2911.1  | 3596.82 | 3360.05 | Down |
| Ropn1l    | 264.092 | -0.4646 | 0.19658 | -2.3636 | 0.0181   | 0.0617   | 293.153 | 349.764 | 275.961 | 242.592 | 184.804 | 238.28  | Down |
| Cmb1      | 1977.82 | -0.4414 | 0.19077 | -2.3138 | 0.02068  | 0.06843  | 2371.35 | 2409.06 | 2053.95 | 1923.11 | 1211.26 | 1898.2  | Down |
| Snhg18    | 802.26  | -0.4474 | 0.11437 | -3.9116 | 9.17E-05 | 0.0007   | 915.256 | 941.968 | 919.552 | 709.114 | 703.313 | 624.354 | Down |
| Sema5a    | 1517.64 | -0.2321 | 0.09596 | -2.4189 | 0.01557  | 0.05464  | 1605.08 | 1623.29 | 1690.14 | 1349.8  | 1368.61 | 1468.89 | Down |
| Gm32618   | 196.307 | -0.4373 | 0.1974  | -2.2153 | 0.02674  | 0.08401  | 198.338 | 222.316 | 256.863 | 152.397 | 168.964 | 178.961 | Down |
| Sdc2      | 4983.05 | -0.6497 | 0.10225 | -6.3536 | 2.10E-10 | 5.30E-09 | 5730.51 | 5940.25 | 6588.69 | 3278.03 | 3781.63 | 4129.18 | Down |
| Mtdh      | 6559.42 | 0.34763 | 0.12957 | 2.68299 | 0.0073   | 0.02951  | 6420.34 | 5497.53 | 5400.82 | 7050.7  | 8318.31 | 6668.82 | Up   |
| Rpl30     | 5723.27 | -0.3301 | 0.13037 | -2.5324 | 0.01133  | 0.04234  | 6761.87 | 5661.39 | 6702.32 | 5535.6  | 5441.7  | 4418.74 | Down |
| Erich5    | 21.8301 | -1.3984 | 0.55005 | -2.5424 | 0.01101  | 0.04136  | 23.22   | 44.0799 | 27.6916 | 11.4039 | 9.50423 | 15.081  | Down |
| Stk3      | 2328.78 | 0.1852  | 0.102   | 3.12262 | 0.00179  | 0.0091   | 1934.04 | 2058.34 | 2225.83 | 2463.24 | 2639.01 | 2652.25 | Up   |
| Gm33497   | 5.97952 | 3.05974 | 1.26116 | 2.42613 | 0.01526  | 0.05379  | 0.9675  | 2.87478 | 0       | 18.6609 | 6.33615 | 7.03781 | Up   |
| Osr2      | 54.903  | 1.4296  | 0.38224 | 3.74009 | 0.00018  | 0.0013   | 17.415  | 38.3303 | 33.4209 | 77.7537 | 76.0338 | 86.4645 | Up   |
| Vps13b    | 1239.16 | 0.45522 | 0.12187 | 3.73541 | 0.00019  | 0.00132  | 1137.78 | 989.881 | 1008.36 | 138.16  | 134.38  | 1565.41 | Up   |
| Rnf19a    | 4566.88 | 0.33055 | 0.12376 | 2.67089 | 0.00756  | 0.03039  | 4220.24 | 3491.89 | 4425.88 | 4824.88 | 5040.41 | 5398    | Up   |
| Ankrd46   | 6293.92 | 0.20101 | 0.10149 | 1.9806  | 0.04764  | 0.13145  | 6335.2  | 5416.08 | 5817.15 | 6830.92 | 6991.94 | 6372.23 | Up   |
| Gm46515   | 22.7009 | -1.2003 | 0.5624  | -2.1343 | 0.03282  | 0.09812  | 16.4475 | 41.2051 | 37.2404 | 14.514  | 13.7283 | 13.0702 | Down |
| Ywhaz     | 21966.3 | 0.23193 | 0.08967 | 2.58657 | 0.00969  | 0.03725  | 18819.8 | 20330.4 | 21462.9 | 22990.2 | 24376.2 | 23817.9 | Up   |
| Gm10384   | 48.1607 | 0.92339 | 0.39792 | 2.32058 | 0.02031  | 0.06752  | 23.22   | 31.6225 | 44.8795 | 76.717  | 61.2495 | 51.2754 | Up   |
| Gm34590   | 32.5367 | -0.9776 | 0.47636 | -2.0522 | 0.04015  | 0.11486  | 35.7976 | 45.0382 | 48.699  | 25.9179 | 11.6163 | 28.1512 | Down |
| Grhl2     | 1862.1  | 0.39145 | 0.1318  | 2.96993 | 0.00298  | 0.01399  | 1572.19 | 1661.62 | 1599.43 | 2272.48 | 1783.63 | 2283.27 | Up   |
| Ncald     | 2466.72 | -0.331  | 0.14648 | -2.2596 | 0.02385  | 0.07671  | 2519.37 | 3035.76 | 2689.91 | 2128.38 | 2540.8  | 1886.13 | Down |
| Ubr5      | 6428.39 | 0.2089  | 0.08755 | 2.38603 | 0.01703  | 0.05881  | 6005.28 | 5938.33 | 5947.97 | 6530.27 | 6783.91 | 7364.56 | Up   |
| Gm41307   | 200.529 | 1.82838 | 0.26106 | 7.00361 | 2.49E-12 | 8.41E-11 | 113.198 | 83.3685 | 67.7967 | 289.244 | 379.113 | 270.453 | Up   |
| G930009F  | 229.553 | 0.9022  | 0.19809 | 4.55441 | 5.25E-06 | 5.52E-05 | 148.995 | 163.862 | 167.105 | 298.574 | 347.432 | 251.35  | Up   |
| Azin1     | 15898.8 | 1.07499 | 0.12831 | 8.37819 | 5.37E-17 | 3.56E-15 | 9419.59 | 10121.1 | 11164.5 | 18875.5 | 24199.9 | 21612.1 | Up   |
| Atp6v1c1  | 4341.42 | 0.42957 | 0.11686 | 3.67593 | 0.00024  | 0.00161  | 3733.59 | 3699.84 | 3665.8  | 4859.09 | 5642.34 | 4447.89 | Up   |
| Gm9522    | 51.608  | -1.5173 | 0.5031  | -3.0159 | 0.00256  | 0.0123   | 69.6601 | 67.0781 | 92.6236 | 27.9913 | 42.241  | 10.054  | Down |
| Dcstamp   | 66.6322 | 2.46133 | 0.70161 | 3.50812 | 0.00045  | 0.00284  | 24.1875 | 9.58259 | 27.6916 | 54.9459 | 39.0729 | 244.312 | Up   |
| Lrp12     | 1469.34 | 1.92193 | 0.27337 | 7.0304  | 2.06E-12 | 7.05E-11 | 864.946 | 529.917 | 445.93  | 2207.17 | 3029.74 | 1738.34 | Up   |
| AU022793  | 163.388 | 1.98117 | 0.32481 | 6.0994  | 1.06E-09 | 2.35E-08 | 94.8151 | 55.579  | 47.7441 | 232.224 | 335.816 | 214.15  | Up   |
| Gm33251   | 6.87281 | 3.73236 | 1.19284 | 3.12897 | 0.00175  | 0.00892  | 1.935   | 0       | 0.95488 | 14.514  | 14.7844 | 9.04861 | Up   |
| Zfpm2     | 530.106 | -0.4278 | 0.17013 | -2.5148 | 0.01191  | 0.04407  | 577.598 | 703.362 | 543.328 | 502.807 | 460.427 | 393.112 | Down |
| Abra      | 135.082 | -2.6281 | 0.92596 | -2.8382 | 0.00454  | 0.02     | 147.06  | 416.843 | 133.684 | 42.5053 | 63.3615 | 7.03781 | Down |
| Angpt1    | 4905.13 | -0.7245 | 0.10254 | -7.065  | 1.61E-12 | 5.62E-11 | 5995.61 | 6368.59 | 5969.93 | 3573.56 | 4062.53 | 3460.59 | Down |
| Gm17473   | 60.4127 | -1.1429 | 0.50036 | -2.2841 | 0.02237  | 0.0728   | 71.5951 | 98.7006 | 79.2553 | 13.4773 | 40.129  | 59.3187 | Down |
| Nudcd1    | 1303.4  | 0.26268 | 0.11098 | 2.36693 | 0.01794  | 0.0613   | 1226.79 | 1227.53 | 1100.98 | 1511.53 | 1337.98 | 1415.6  | Up   |
| Ebag9     | 1606.28 | 0.28302 | 0.10631 | 2.66216 | 0.00776  | 0.03105  | 1405.78 | 1572.5  | 1369.3  | 1814.25 | 1785.74 | 1690.08 | Up   |
| Sybu      | 275.044 | -1.1084 | 0.18952 | -5.8486 | 4.96E-09 | 9.63E-08 | 362.813 | 434.091 | 330.389 | 189.719 | 177.412 | 155.837 | Down |
| A930017A  | 84.2234 | -1.8322 | 0.58982 | -3.1065 | 0.00189  | 0.00953  | 35.7976 | 204.109 | 154.691 | 36.2851 | 22.1765 | 52.2808 | Down |
| Aard      | 530.976 | -0.9743 | 0.14945 | -6.5195 | 7.05E-11 | 1.91E-09 | 613.396 | 742.65  | 755.312 | 356.63  | 335.816 | 382.052 | Down |
| Med30     | 1446.1  | -0.2468 | 0.11628 | -2.1229 | 0.03376  | 0.1003   | 1607.02 | 1589.75 | 1511.58 | 1421.34 | 1368.61 | 1178.33 | Down |
| Ext1      | 3265.96 | 0.41027 | 0.10011 | 4.09805 | 4.17E-05 | 0.00035  | 2704.17 | 2818.24 | 2891.39 | 3700.04 | 4021.34 | 3460.59 | Up   |
| Tnfrsf11b | 244.056 | 0.97132 | 0.21115 | 4.60001 | 4.22E-06 | 4.55E-05 | 178.02  | 134.156 | 182.383 | 368.034 | 325.256 | 276.485 | Up   |
| Ccn3      | 672.472 | -2.0423 | 0.25656 | -7.9604 | 1.72E-15 | 9.23E-14 | 697.569 | 1472.84 | 1076.15 | 272.656 | 269.286 | 246.323 | Down |
| Enpp2     | 3478.27 | -0.2754 | 0.12364 | -2.227  | 0.02595  | 0.08204  | 4217.34 | 3461.23 | 3748.87 | 2986.78 | 3475.38 | 2980.01 | Down |
| Col14a1   | 1628.72 | -0.3524 | 0.12148 | -2.9011 | 0.00372  | 0.01688  | 1895.34 | 1960.6  | 1624.26 | 1438.96 | 1339.04 | 1514.13 | Down |
| Mrpl13    | 1728.14 | -0.3357 | 0.11073 | -3.0318 | 0.00243  | 0.01176  | 1732.8  | 2035.34 | 2016.71 | 1578.92 | 1508    | 1497.04 | Down |
| Slc22a22  | 101.832 | -1.3623 | 0.27345 | -4.9818 | 6.30E-07 | 8.17E-06 | 168.345 | 124.574 | 147.052 | 47.6889 | 55.9693 | 67.3619 | Down |
| Der1l     | 8804.79 | 0.29314 | 0.10151 | 2.88781 | 0.00388  | 0.01751  | 7862.88 | 7852.93 | 8023.88 | 9753.42 | 10564.5 | 8771.12 | Up   |
| Tbc1d31   | 553.789 | 0.37412 | 0.17984 | 2.08027 | 0.0375   | 0.10896  | 517.613 | 438.882 | 490.81  | 693.563 | 493.164 | 688.7   | Up   |
| Atad2     | 1199.77 | 0.58523 | 0.16187 | 3.61549 | 0.0003   | 0.00198  | 1181.32 | 858.6   | 839.342 | 1443.11 | 1380.23 | 1496.04 | Up   |
| Wdyh1     | 2306.08 | -0.3256 | 0.13819 | -2.3561 | 0.01847  | 0.06275  | 2430.36 | 2790.45 | 2475.06 | 2130.45 | 1732.94 | 2277.23 | Down |
| Fam91a1   | 6316.35 | 0.51262 | 0.09816 | 5.22254 | 1.76E-07 | 2.52E-06 | 5383.18 | 4858.37 | 5375.99 | 6904.53 | 7705.82 | 7670.2  | Up   |
| Gm20712   | 166.193 | -0.5661 | 0.20857 | -2.7142 | 0.00664  | 0.0273   | 173.183 | 224.233 | 197.661 | 130.626 | 146.788 | 124.67  | Down |
| Mtss1     | 4605.64 | 0.69352 | 0.10288 | 6.74137 | 1.57E-11 | 4.77E-10 | 3838.08 | 3507.23 | 3213.18 | 5542.28 | 5853.55 | 5679.51 | Up   |
| Gm36617   | 20.7264 | -1.2908 | 0.64996 | -1.9859 | 0.04704  | 0.13011  | 22.2525 | 41.2051 | 24.827  | 4.14686 | 15.8404 | 16.0864 | Down |
| Sqle      | 6122.4  | 1.09751 | 0.13347 | 8.22262 | 1.99E-16 | 1.21E-14 | 4210.57 | 4266.17 | 3222.73 | 8072.91 | 8597.1  | 8364.94 | Up   |
| Washc5    | 3220.65 | 0.36141 | 0.10776 | 3.35374 | 0.0008   | 0.0046   | 3033.12 | 2738.7  | 2686.09 | 3547.64 | 3923.13 | 3395.24 | Up   |
| Trib1     | 2630.88 | 0.29971 | 0.14707 | 2.03795 | 0.04155  | 0.11811  | 2520.34 | 2283.53 | 2271.67 | 2935.98 | 3371.89 | 2401.9  | Up   |
| Gm2682    | 371.417 | -0.6868 | 0.18498 | -3.7128 | 0.0002   | 0.00142  | 423.766 | 515.543 | 435.427 | 247.775 | 267.174 | 338.82  | Down |
| Myc       | 683.135 | 0.72465 | 0.19933 | 3.63535 | 0.00028  | 0.00185  | 537.931 | 478.171 | 529.005 | 809.675 | 1083.48 | 660.548 | Up   |
| Pvt1      | 216.731 | 0.58692 | 0.18403 | 3.18925 | 0.00143  | 0.00752  | 200.273 | 156.196 | 163.285 | 261.252 | 264.006 | 255.372 | Up   |
| Fam49b    | 4367.39 | 0.70449 | 0.11075 | 6.36119 | 2.00E-10 | 5.07E-09 |         |         |         |         |         |         |      |

|          |         |         |         |         |          |          |         |         |         |         |         |         |      |
|----------|---------|---------|---------|---------|----------|----------|---------|---------|---------|---------|---------|---------|------|
| Ndrgr1   | 556.126 | -0.2918 | 0.13114 | -2.2253 | 0.02606  | 0.0823   | 608.558 | 592.204 | 635.952 | 471.706 | 478.379 | 549.954 | Down |
| St3gal1  | 8752.07 | 0.77364 | 0.1348  | 5.73928 | 9.51E-09 | 1.74E-07 | 6810.24 | 5991.99 | 6578.19 | 9310.75 | 11331.2 | 12490.1 | Up   |
| Khdrbs3  | 1291.55 | -0.3227 | 0.13544 | -2.3825 | 0.0172   | 0.0592   | 1277.1  | 1649.16 | 1379.81 | 1097.88 | 1211.26 | 1134.09 | Down |
| Gm2999   | 92.0332 | 1.0179  | 0.2588  | 3.93319 | 8.38E-05 | 0.00065  | 72.5626 | 55.579  | 54.4283 | 118.186 | 127.779 | 123.664 | Up   |
| Dennd3   | 5754.64 | -0.5317 | 0.16271 | -3.2677 | 0.00108  | 0.00597  | 5354.15 | 6960.79 | 8094.54 | 4831.1  | 4956.98 | 4330.26 | Down |
| Ptp4a3   | 7195.59 | -0.5135 | 0.15632 | -3.2848 | 0.00102  | 0.00567  | 9866.58 | 7273.18 | 8248.28 | 6194.38 | 6561.09 | 5030.02 | Down |
| Mroh5    | 19.5467 | -1.6648 | 0.83067 | -2.0041 | 0.04505  | 0.12572  | 16.4475 | 25.873  | 46.7893 | 2.07343 | 20.0645 | 6.03241 | Down |
| Them6    | 938.855 | -0.5394 | 0.17392 | -3.1018 | 0.00192  | 0.00965  | 1308.06 | 1011.92 | 1016.95 | 823.152 | 841.652 | 631.392 | Down |
| Lypd2    | 1415.23 | -2.7601 | 0.83245 | -3.3156 | 0.00091  | 0.00517  | 1503.5  | 3869.45 | 2026.26 | 258.142 | 116.163 | 717.856 | Down |
| Slurp2   | 80.9586 | -4.1611 | 0.42649 | -9.7566 | 1.73E-22 | 1.89E-20 | 175.118 | 144.697 | 140.368 | 9.33044 | 3.16808 | 13.0702 | Down |
| Lynx1    | 1903.8  | -0.7519 | 0.15809 | -4.7559 | 1.98E-06 | 2.28E-05 | 2271.69 | 2855.61 | 2039.63 | 1554.04 | 1286.24 | 1415.6  | Down |
| Ly6d     | 729.938 | 0.55364 | 0.21534 | 2.57104 | 0.01014  | 0.03865  | 794.319 | 471.463 | 508.953 | 874.988 | 935.638 | 794.267 | Up   |
| Gm17189  | 396.283 | 0.43889 | 0.21615 | 2.03051 | 0.0423   | 0.11975  | 267.03  | 412.051 | 330.389 | 450.971 | 384.393 | 532.862 | Up   |
| Ly6m     | 132.232 | -1.6309 | 0.31829 | -5.1238 | 2.99E-07 | 4.13E-06 | 154.8   | 280.77  | 164.24  | 59.0928 | 58.0814 | 76.4105 | Down |
| Ly6e     | 62236.4 | 0.77656 | 0.09327 | 8.32557 | 8.39E-17 | 5.40E-15 | 46926.7 | 45145.5 | 45566.1 | 83412.1 | 80605.4 | 71762.5 | Up   |
| Ly6i     | 3807.19 | 5.88486 | 0.28297 | 20.7964 | 4.66E-96 | 5.03E-92 | 119.003 | 128.407 | 132.729 | 9524.31 | 4030.85 | 8907.85 | Up   |
| Ly6c2    | 2283.23 | 2.33086 | 0.17466 | 13.3451 | 1.26E-40 | 6.65E-38 | 863.979 | 824.102 | 583.433 | 3954.03 | 4145.96 | 3327.88 | Up   |
| Ly6g2    | 119.375 | 6.06208 | 0.51006 | 11.8851 | 1.41E-32 | 3.47E-30 | 1.935   | 5.74955 | 2.86465 | 265.399 | 250.278 | 190.021 | Up   |
| 9030619P | 3.20064 | 5.181   | 2.48007 | 2.08905 | 0.0367   | 0.10723  | 0       | 0       | 0       | 0       | 2.11205 | 17.0918 | Up   |
| Gpihbp1  | 7662.68 | -0.822  | 0.18384 | -4.4716 | 7.76E-06 | 7.86E-05 | 8306.97 | 9041.17 | 12017.2 | 6007.77 | 6166.13 | 4436.83 | Down |
| 2810039B | 206.81  | -0.4022 | 0.18421 | -2.1833 | 0.02902  | 0.08965  | 210.915 | 230.94  | 264.503 | 172.095 | 177.412 | 184.994 | Down |
| Rhpn1    | 480.793 | 0.619   | 0.24371 | 2.53988 | 0.01109  | 0.0416   | 360.878 | 403.427 | 373.359 | 768.206 | 390.729 | 588.16  | Up   |
| Naprt    | 872.111 | 0.65693 | 0.13055 | 5.0322  | 4.85E-07 | 6.39E-06 | 745.944 | 670.781 | 613.99  | 1027.39 | 1151.07 | 1023.5  | Up   |
| Eef1d    | 5805.86 | -0.2437 | 0.08842 | -2.7562 | 0.00585  | 0.02469  | 6376.8  | 6047.57 | 6460.74 | 5641.81 | 5177.69 | 5130.56 | Down |
| Tsta3    | 1790.75 | 0.38689 | 0.10036 | 3.85498 | 0.00012  | 0.00086  | 1606.05 | 1430.68 | 1619.48 | 2074.47 | 1998    | 2015.83 | Up   |
| Zfp707   | 842.419 | -0.2617 | 0.12773 | -2.0491 | 0.04045  | 0.11555  | 864.946 | 862.433 | 1028.41 | 796.198 | 764.562 | 737.964 | Down |
| Mapk15   | 4521.23 | -0.5177 | 0.2078  | -2.4914 | 0.01272  | 0.04652  | 4394.39 | 5762.01 | 5815.24 | 4610.28 | 2669.63 | 3875.82 | Down |
| Fam83h   | 1251.08 | 0.44895 | 0.09733 | 4.61267 | 3.98E-06 | 4.30E-05 | 1021.68 | 1057.92 | 1094.3  | 1495.98 | 1412.96 | 1423.65 | Up   |
| Nrbp2    | 3070.62 | 0.48613 | 0.11398 | 4.26491 | 2.00E-05 | 0.00018  | 2526.15 | 2313.24 | 2835.05 | 3461.59 | 3513.4  | 3774.27 | Up   |
| Gm41349  | 156.151 | -0.6969 | 0.23643 | -2.9475 | 0.0032   | 0.01491  | 161.573 | 189.735 | 228.217 | 114.039 | 105.603 | 137.74  | Down |
| Eppk1    | 820.315 | -0.4677 | 0.20753 | -2.2536 | 0.02422  | 0.07765  | 724.659 | 938.135 | 1193.6  | 587.818 | 707.537 | 770.137 | Down |
| BC024139 | 67.1299 | 0.83088 | 0.29057 | 2.85947 | 0.00424  | 0.01888  | 48.3751 | 41.2051 | 55.3832 | 85.0107 | 81.314  | 91.4915 | Up   |
| Parp10   | 2079.96 | 0.30552 | 0.10551 | 2.89566 | 0.00378  | 0.01715  | 1881.79 | 1751.7  | 1947.96 | 2226.87 | 2481.66 | 2189.76 | Up   |
| Grina    | 9553.63 | 0.47706 | 0.13365 | 3.56954 | 0.00036  | 0.00232  | 9119.67 | 7742.73 | 7102.42 | 11163.4 | 12172.8 | 10020.8 | Up   |
| Oplah    | 3329.09 | 0.46651 | 0.14191 | 3.28727 | 0.00101  | 0.00564  | 3295.31 | 2681.21 | 2410.12 | 3824.44 | 3644.34 | 4119.13 | Up   |
| Gpaa1    | 2692.57 | 0.2973  | 0.09621 | 3.09022 | 0.002    | 0.00997  | 2385.86 | 2445.48 | 2416.81 | 3108.07 | 3063.53 | 2735.7  | Up   |
| Sharpin  | 2754.26 | 0.35504 | 0.11792 | 3.01087 | 0.0026   | 0.01248  | 2461.32 | 2420.56 | 2369.06 | 3312.31 | 3277.9  | 2684.42 | Up   |
| Mroh1    | 4896.18 | 0.73666 | 0.10277 | 7.16794 | 7.61E-13 | 2.77E-11 | 3895.16 | 3553.22 | 3569.35 | 6276.28 | 6484    | 5599.08 | Up   |
| Hsf1     | 2848.61 | -0.2754 | 0.10533 | -2.6151 | 0.00892  | 0.03474  | 3100.84 | 2922.69 | 3335.41 | 2629.11 | 2709.76 | 2393.86 | Down |
| Slc39a4  | 17606.4 | 1.74771 | 0.21589 | 8.09545 | 5.71E-16 | 3.33E-14 | 8997.76 | 7916.17 | 7324.91 | 32171.4 | 17825.7 | 31402.7 | Up   |
| Tonsl    | 383.247 | 0.70316 | 0.15202 | 4.62532 | 3.74E-06 | 4.08E-05 | 312.503 | 275.978 | 286.465 | 523.542 | 464.651 | 436.344 | Up   |
| Cyhr1    | 7148.63 | 0.20269 | 0.08161 | 2.48356 | 0.01301  | 0.04738  | 6679.63 | 6680.02 | 6582.01 | 7913.25 | 7804.03 | 7232.85 | Up   |
| Ppp1r16a | 4801    | 0.38473 | 0.10456 | 3.67951 | 0.00023  | 0.00159  | 3762.61 | 4241.25 | 4489.86 | 5665.65 | 5336.1  | 5310.53 | Up   |
| Gpt      | 3255.61 | 0.50792 | 0.16457 | 3.08624 | 0.00203  | 0.01008  | 3061.17 | 2606.46 | 2397.71 | 3908.42 | 3109.99 | 4449.9  | Up   |
| 1110038F | 1632.71 | -0.3165 | 0.12716 | -2.4886 | 0.01282  | 0.04684  | 1872.12 | 1646.29 | 1914.54 | 1423.41 | 1616.77 | 1323.11 | Down |
| Mb       | 5193.38 | -6.3364 | 1.4172  | -4.471  | 7.78E-06 | 7.87E-05 | 5041.65 | 21636.5 | 4101.22 | 87.0841 | 4.2241  | 289.555 | Down |
| Apol6    | 182.959 | -2.3828 | 0.49908 | -4.7745 | 1.80E-06 | 2.10E-05 | 179.955 | 570.164 | 170.924 | 55.9827 | 85.5381 | 35.189  | Down |
| Apol7a   | 237.618 | 3.65614 | 0.36975 | 9.88817 | 4.69E-23 | 5.26E-21 | 46.4401 | 38.3303 | 20.0525 | 594.038 | 271.399 | 455.447 | Up   |
| Apol9a   | 154.695 | 1.82097 | 0.41999 | 4.33574 | 1.45E-05 | 0.00014  | 82.2376 | 92.9511 | 29.6014 | 297.537 | 158.404 | 267.437 | Up   |
| Apol9b   | 275.627 | 0.9058  | 0.26168 | 3.46146 | 0.00054  | 0.00329  | 214.785 | 230.94  | 129.864 | 385.658 | 289.351 | 403.166 | Up   |
| Myh9     | 22774   | 0.43172 | 0.12116 | 3.56318 | 0.00037  | 0.00236  | 18916.6 | 17430.7 | 21827.7 | 24229.1 | 28154.7 | 26085.1 | Up   |
| Txn2     | 4280.45 | -0.2761 | 0.13113 | -2.1054 | 0.03525  | 0.10388  | 4085.76 | 5409.37 | 4571.02 | 3955.07 | 4012.9  | 3648.6  | Down |
| Ift27    | 1485.8  | -0.4279 | 0.12074 | -3.544  | 0.00039  | 0.00252  | 1612.82 | 1755.53 | 1745.53 | 1291.75 | 1125.72 | 1383.43 | Down |
| Ncf4     | 875.775 | 1.12443 | 0.15256 | 7.37061 | 1.70E-13 | 6.98E-12 | 604.688 | 561.54  | 486.035 | 1155.94 | 1369.66 | 1076.78 | Up   |
| Csf2rb2  | 1216.76 | 2.45349 | 0.24085 | 10.1867 | 2.27E-24 | 2.85E-22 | 528.256 | 333.474 | 265.457 | 1785.22 | 2108.88 | 2279.24 | Up   |
| Csf2rb   | 3563.28 | 2.26307 | 0.21125 | 10.7127 | 8.87E-27 | 1.42E-24 | 1605.08 | 1186.32 | 894.725 | 5348.42 | 6853.6  | 5491.5  | Up   |
| Il2rb    | 497.282 | -0.5194 | 0.1764  | -2.9444 | 0.00324  | 0.01502  | 542.768 | 644.908 | 570.065 | 409.503 | 336.872 | 479.576 | Down |
| C1qtnf6  | 650.726 | -0.3112 | 0.12316 | -2.5271 | 0.0115   | 0.04291  | 684.991 | 705.278 | 771.545 | 608.552 | 585.038 | 548.949 | Down |
| Gm49490  | 25.1392 | -3.0232 | 0.6171  | -4.8991 | 9.63E-07 | 1.19E-05 | 29.9925 | 66.1198 | 38.1953 | 6.2203  | 5.28013 | 5.027   | Down |
| Sstr3    | 32.6203 | -3.5521 | 0.89289 | -3.9782 | 6.94E-05 | 0.00055  | 34.8301 | 117.866 | 27.6916 | 0       | 5.28013 | 10.054  | Down |
| Rac2     | 2994.76 | 0.60462 | 0.15183 | 3.98216 | 6.83E-05 | 0.00054  | 2877.35 | 2247.12 | 2004.3  | 3643.02 | 3756.28 | 3440.48 | Up   |
| Cyth4    | 2231.8  | 1.15846 | 0.15584 | 7.43345 | 1.06E-13 | 4.46E-12 | 1612.82 | 1260.11 | 1269.99 | 2794.99 | 3570.42 | 2882.48 | Up   |
| Elfn2    | 5.16612 | 4.86238 | 1.68806 | 2.88044 | 0.00397  | 0.01786  | 0.9675  | 0       | 0       | 2.07343 | 16.8964 | 11.0594 | Up   |
| Mfn3     | 1746.15 | -0.5189 | 0.13173 | -3.9395 | 8.16E-05 | 0.00063  | 1910.82 | 1870.52 | 2389.12 | 1436.89 | 1471.04 | 1398.51 | Down |
| Card10   | 2896.19 | -0.3671 | 0.1183  | -3.1029 | 0.00192  | 0.00962  | 2943.14 | 3277.24 | 3567.44 | 2393.78 | 2739.33 | 2456.19 | Down |
| Cdc42ep1 | 7294.82 | -0.3487 | 0.14409 | -2.4204 | 0.01551  | 0.05448  | 8214.09 | 6969.42 | 9333.03 | 6656.75 | 6941.25 | 5654.37 | Down |
| Gm26634  | 15.6568 | -1.3256 | 0.61245 | -2.1645 | 0.03043  | 0.09274  | 20.3175 | 16.2904 | 30.5563 | 9.33044 | 7.39218 | 10.054  | Down |
| Triobp   | 983.5   | 0.27181 | 0.13861 | 1.96097 | 0.04988  | 0.13658  | 1009.1  | 777.148 | 887.086 | 1061.6  | 1141.56 | 1024.5  | Up   |
| H1f0     | 4853.63 | 0.56798 | 0.14333 | 3.96266 | 7.41E-05 | 0.00058  | 4553.06 | 3841.66 | 3336.36 | 5632.48 | 6356.22 | 5402.02 | Up   |
| Gcat     | 11.4311 | 2.79612 | 0.82274 | 3.39854 | 0.00068  | 0.00402  | 0.9675  | 3.83303 | 3.81953 | 14.514  | 25.3446 | 20.108  | Up   |
| Galr3    | 16.1224 | 3.53269 | 0.80876 | 4.36806 | 1.25E-05 | 0.00012  | 3.87001 | 3.83303 | 0       | 27.9913 | 35.9049 | 25.135  | Up   |
| Gm3924   | 70.2396 | 2.52407 | 0.32695 | 7.72002 | 1.16E-14 | 5.53E-13 | 18.3825 | 22.9982 | 21.0074 | 122.332 | 135.171 | 101.545 | Up   |
| Micall1  | 190.801 | 0.68577 | 0.20462 | 3.35146 | 0.0008   | 0.00464  | 163.508 | 126.49  | 148.962 | 220.82  | 218.597 | 266.431 | Up   |
| Gm10863  | 86.7787 | 0.76491 | 0.29435 | 2.59866 | 0.00936  | 0.03618  | 48.3751 | 77.619  | 66.8418 | 102.635 | 125.667 | 99.5347 | Up   |
| Baiap2l2 | 61.1914 | -1.7948 | 0.48202 | -3.7234 | 0.0002   | 0.00137  | 75.4651 | 142.781 | 66.8418 | 32.1382 | 13.7283 | 36.1944 | Down |
| Pla2g6   | 1702.32 | 0.37808 | 0.11497 | 3.28856 | 0.00101  | 0.00562  | 1346.76 | 1635.75 | 1459.06 | 1994.64 | 1854.38 | 1923.33 | Up   |
| Tmem184  | 7102.38 | -0.2378 | 0.1108  | -2.1463 | 0.03185  | 0.09596  | 7130.   |         |         |         |         |         |      |

|           |         |         |         |         |          |          |         |         |         |         |         |         |      |
|-----------|---------|---------|---------|---------|----------|----------|---------|---------|---------|---------|---------|---------|------|
| Gm41361   | 86.8765 | -1.0968 | 0.29812 | -3.6789 | 0.00023  | 0.00159  | 121.905 | 89.1181 | 144.187 | 52.8725 | 53.8573 | 59.3187 | Down |
| Mgat3     | 2967.35 | -0.8762 | 0.26971 | -3.2486 | 0.00116  | 0.00632  | 3094.07 | 4770.21 | 3661.02 | 2170.88 | 1276.73 | 2831.21 | Down |
| Sgsm3     | 3388.72 | 0.3758  | 0.12418 | 3.0262  | 0.00248  | 0.01194  | 2811.56 | 3078.89 | 2959.18 | 4276.45 | 3324.37 | 3881.85 | Up   |
| Mrtfa     | 2013.67 | 0.44562 | 0.15005 | 2.96986 | 0.00298  | 0.01399  | 1774.4  | 1523.63 | 1817.14 | 2279.74 | 2703.42 | 1983.66 | Up   |
| Mchr1     | 12.0981 | -1.4284 | 0.72264 | -1.9766 | 0.04809  | 0.13239  | 27.09   | 11.4991 | 14.3232 | 7.25701 | 7.39218 | 5.027   | Down |
| 8430426Jc | 91.7154 | -0.8028 | 0.27586 | -2.9103 | 0.00361  | 0.01648  | 137.385 | 110.2   | 102.172 | 77.7537 | 65.4736 | 57.3078 | Down |
| Slc25a17  | 5232.31 | -0.2892 | 0.13724 | -2.1072 | 0.0351   | 0.10356  | 5022.3  | 6558.32 | 5684.42 | 4761.64 | 4233.61 | 5133.58 | Down |
| Chadl     | 107.867 | -0.5661 | 0.27416 | -2.0647 | 0.03896  | 0.11219  | 159.638 | 112.116 | 114.586 | 72.5701 | 89.7622 | 98.5293 | Down |
| Rangap1   | 3383.79 | 0.26191 | 0.11839 | 2.21218 | 0.02695  | 0.08452  | 3275.96 | 2675.46 | 3280.98 | 3795.42 | 3751    | 3523.93 | Up   |
| Tob2      | 2864.98 | -0.5584 | 0.12285 | -4.5455 | 5.48E-06 | 5.74E-05 | 3336.91 | 3802.37 | 3098.59 | 2523.37 | 2240.89 | 2187.75 | Down |
| Csdc2     | 294.656 | -3.281  | 0.41053 | -7.9921 | 1.33E-15 | 7.24E-14 | 389.903 | 897.888 | 315.111 | 53.9092 | 73.9218 | 37.1998 | Down |
| Pmm1      | 1314.05 | -0.6244 | 0.15042 | -4.151  | 3.31E-05 | 0.00028  | 1879.86 | 1446.97 | 1455.24 | 1045.01 | 1115.16 | 942.061 | Down |
| Snu13     | 4077.59 | -0.2171 | 0.08964 | -2.4218 | 0.01544  | 0.05432  | 4220.24 | 4317.91 | 4613.04 | 3778.83 | 3922.08 | 3613.41 | Down |
| Sreb12    | 10576.2 | 0.45412 | 0.08379 | 5.41986 | 5.96E-08 | 9.27E-07 | 8812.97 | 8799.69 | 9163.06 | 11900.5 | 12964.8 | 11816.5 | Up   |
| Septin3   | 300.416 | 1.17419 | 0.21637 | 5.42678 | 5.74E-08 | 8.99E-07 | 224.46  | 167.695 | 161.375 | 337.969 | 463.595 | 447.403 | Up   |
| Wbp2nl    | 35.7384 | 1.25672 | 0.46645 | 2.69419 | 0.00706  | 0.02873  | 12.5775 | 22.9982 | 27.6916 | 52.8725 | 36.9609 | 61.3295 | Up   |
| Naga      | 6958.03 | 0.79615 | 0.08656 | 9.19725 | 3.67E-20 | 3.27E-18 | 5292.23 | 5083.56 | 4880.41 | 9064.01 | 9046.97 | 8381.02 | Up   |
| Ndufa6    | 2693.61 | -0.2389 | 0.1028  | -2.3243 | 0.02011  | 0.06708  | 2928.63 | 2891.07 | 2928.63 | 2707.9  | 2415.13 | 2290.3  | Down |
| Cyp2d22   | 3516.92 | -0.9751 | 0.09627 | -10.128 | 4.13E-24 | 5.06E-22 | 4513.39 | 4509.57 | 4963.48 | 2507.82 | 2317.98 | 2289.3  | Down |
| Cyp2d10   | 75.7297 | 5.14845 | 1.90004 | 2.70966 | 0.00674  | 0.02762  | 0       | 12.4574 | 0       | 230.151 | 97.1543 | 114.616 | Up   |
| Cyp2d34   | 43.1274 | 8.93162 | 1.3105  | 6.81544 | 9.40E-12 | 2.96E-10 | 0       | 0       | 0       | 148.25  | 61.2495 | 49.2646 | Up   |
| Gm49431   | 2.78112 | 3.92772 | 1.95979 | 2.00415 | 0.04505  | 0.12572  | 0       | 0       | 0.95488 | 3.11015 | 11.6163 | 1.0054  | Up   |
| Nfam1     | 1689.29 | 1.41761 | 0.22319 | 6.35153 | 2.13E-10 | 5.35E-09 | 1160.03 | 893.097 | 707.568 | 2133.56 | 3132.17 | 2109.33 | Up   |
| A4galt    | 1943.86 | -0.7547 | 0.11834 | -6.3775 | 1.80E-10 | 4.59E-09 | 2148.82 | 2634.25 | 2539.99 | 1497.02 | 1401.35 | 1441.74 | Down |
| 1700001U  | 496.29  | 0.41922 | 0.14064 | 2.9808  | 0.00288  | 0.01356  | 429.571 | 386.178 | 458.344 | 606.479 | 530.125 | 567.046 | Up   |
| Ttl12     | 1197.47 | 0.29589 | 0.12491 | 2.36889 | 0.01784  | 0.06102  | 1164.87 | 995.631 | 1064.69 | 1395.42 | 1372.83 | 1191.4  | Up   |
| Scube1    | 1060.11 | -0.3092 | 0.12965 | -2.3846 | 0.0171   | 0.05899  | 1325.48 | 1069.42 | 1124.85 | 937.191 | 995.832 | 907.877 | Down |
| Efcab6    | 840.507 | -0.7197 | 0.25184 | -2.8579 | 0.00426  | 0.01896  | 1031.36 | 1132.66 | 973.981 | 666.608 | 393.897 | 844.537 | Down |
| Sult4a1   | 139.308 | 1.69725 | 0.30261 | 5.60879 | 2.04E-08 | 3.46E-07 | 84.1726 | 67.0781 | 45.8344 | 193.866 | 178.468 | 266.431 | Up   |
| Pnpla3    | 66.2196 | -2.221  | 0.63809 | -3.4807 | 0.0005   | 0.0031   | 56.1151 | 228.066 | 42.9697 | 31.1015 | 17.9524 | 21.1134 | Down |
| Gm49513   | 70.3165 | -1.6045 | 0.49968 | -3.211  | 0.00132  | 0.00707  | 56.1151 | 189.735 | 71.6162 | 35.2483 | 38.0169 | 31.1674 | Down |
| Samm50    | 3278.16 | -0.2061 | 0.08874 | -2.3223 | 0.02021  | 0.06731  | 3361.1  | 3630.84 | 3543.57 | 3090.45 | 3136.4  | 2906.61 | Down |
| Parvb     | 3914.12 | -0.6536 | 0.17541 | -3.7263 | 0.00019  | 0.00136  | 4070.28 | 4952.28 | 5334.93 | 2754.55 | 3763.67 | 2609.02 | Down |
| Parvg     | 947.606 | 1.38021 | 0.20758 | 6.64907 | 2.95E-11 | 8.57E-10 | 644.356 | 464.755 | 468.847 | 1262.72 | 1712.87 | 1132.08 | Up   |
| Prr5      | 223.838 | -0.4376 | 0.21202 | -2.064  | 0.03902  | 0.11233  | 312.503 | 212.733 | 247.315 | 198.013 | 198.533 | 173.934 | Down |
| Arhgap8   | 1141.08 | 0.56123 | 0.20518 | 2.73528 | 0.00623  | 0.02597  | 1094.24 | 660.24  | 1011.22 | 1175.64 | 1458.37 | 1446.77 | Up   |
| Nup50     | 2957.27 | 0.32117 | 0.09319 | 3.44641 | 0.00057  | 0.00345  | 2771.89 | 2551.84 | 2564.82 | 3350.67 | 3114.22 | 3390.21 | Up   |
| Upk3a     | 110.189 | 1.21552 | 0.51091 | 2.37914 | 0.01735  | 0.05963  | 88.0426 | 73.7859 | 37.2404 | 158.618 | 59.1374 | 244.312 | Up   |
| Fam118a   | 869.779 | -0.4332 | 0.13773 | -3.1454 | 0.00166  | 0.00852  | 908.484 | 954.426 | 1135.36 | 750.582 | 690.641 | 779.186 | Down |
| Ribc2     | 197.058 | -0.938  | 0.27306 | -3.4353 | 0.00059  | 0.00358  | 241.875 | 350.723 | 184.292 | 140.993 | 126.723 | 137.74  | Down |
| Gm19277   | 9.98115 | -3.1356 | 1.54999 | -2.023  | 0.04307  | 0.12146  | 13.545  | 40.2469 | 0       | 2.07343 | 0       | 4.0216  | Down |
| Fbln1     | 2957.93 | -0.4662 | 0.16184 | -2.8807 | 0.00397  | 0.01786  | 3600.07 | 3887.66 | 2807.36 | 2643.63 | 2685.47 | 2123.41 | Down |
| Atxn10    | 10254   | 0.27761 | 0.09523 | 2.91522 | 0.00355  | 0.01627  | 10136.5 | 8707.7  | 8967.31 | 11310.6 | 11277.3 | 11124.8 | Up   |
| Wnt7b     | 755.516 | 1.04009 | 0.24016 | 4.33086 | 1.49E-05 | 0.00014  | 520.516 | 603.703 | 359.036 | 1181.86 | 754.002 | 1113.98 | Up   |
| Ppara     | 183.497 | -1.0022 | 0.35673 | -2.8095 | 0.00496  | 0.02159  | 152.865 | 294.185 | 287.42  | 133.736 | 73.9218 | 158.853 | Down |
| Gtse1     | 133.733 | 1.32951 | 0.24187 | 5.49674 | 3.87E-08 | 6.25E-07 | 63.8551 | 91.0346 | 73.526  | 192.829 | 170.02  | 211.134 | Up   |
| Trmu      | 871.103 | -0.2347 | 0.11225 | -2.0908 | 0.03654  | 0.10686  | 928.801 | 888.306 | 1008.36 | 786.867 | 788.851 | 825.434 | Down |
| Celsr1    | 2902.38 | 0.51537 | 0.12055 | 4.27494 | 1.91E-05 | 0.00017  | 2268.79 | 2486.68 | 2412.99 | 3227.3  | 3141.68 | 3876.83 | Up   |
| Tbc1d22a  | 2072.35 | 0.37431 | 0.118   | 3.17203 | 0.00151  | 0.00789  | 2004.66 | 1741.16 | 1669.14 | 2416.58 | 2428.86 | 2173.68 | Up   |
| Pim3      | 6211.74 | -0.5178 | 0.19179 | -2.6996 | 0.00694  | 0.02835  | 7400.42 | 7656.49 | 6886.62 | 6069.97 | 5667.69 | 3589.28 | Down |
| Ttl8      | 262.441 | -0.7083 | 0.20106 | -3.5228 | 0.00043  | 0.00271  | 287.348 | 299.935 | 389.592 | 184.535 | 189.029 | 224.204 | Down |
| Mlc1      | 5802.57 | 1.68297 | 0.20229 | 8.31972 | 8.82E-17 | 5.61E-15 | 3730.69 | 2094.75 | 2442.59 | 8536.32 | 9129.34 | 8881.71 | Up   |
| Mov101    | 42.9304 | -5.9438 | 0.92965 | -6.3936 | 1.62E-10 | 4.18E-09 | 68.6926 | 145.655 | 39.1502 | 2.07343 | 0       | 2.0108  | Down |
| Panx2     | 57.9931 | -1.9878 | 0.43119 | -4.61   | 4.03E-06 | 4.35E-05 | 126.743 | 93.9093 | 57.293  | 17.6242 | 23.2326 | 29.1566 | Down |
| Hdac10    | 1448.59 | -0.3963 | 0.11093 | -3.5724 | 0.00035  | 0.00229  | 1551.87 | 1589.75 | 1797.09 | 1275.16 | 1286.24 | 1191.4  | Down |
| Mapk12    | 3530.56 | -0.3415 | 0.10922 | -3.1271 | 0.00177  | 0.00897  | 4184.44 | 3498.6  | 4156.61 | 3036.54 | 3131.12 | 3176.06 | Down |
| Mapk11    | 1362.62 | 0.64565 | 0.15332 | 4.21106 | 2.54E-05 | 0.00023  | 936.541 | 1047.38 | 1204.11 | 1427.56 | 1845.93 | 1714.21 | Up   |
| Plxn2     | 19757.7 | 0.83818 | 0.0815  | 10.2845 | 8.28E-25 | 1.08E-22 | 14954.7 | 13910.1 | 13658.6 | 25184.9 | 24800.8 | 26036.9 | Up   |
| Dennd6b   | 906.076 | -0.262  | 0.11393 | -2.2993 | 0.02149  | 0.07051  | 934.606 | 958.259 | 1071.38 | 835.593 | 835.316 | 801.304 | Down |
| Adm2      | 40.3562 | 2.83825 | 0.98109 | 2.89296 | 0.00382  | 0.01727  | 1.935   | 19.1652 | 8.59395 | 176.242 | 21.1205 | 15.081  | Up   |
| Tymp      | 1951.22 | -1.1207 | 0.17154 | -6.5332 | 6.44E-11 | 1.76E-09 | 2326.84 | 2667.79 | 3025.07 | 1301.08 | 979.992 | 1406.56 | Down |
| Odf3b     | 2232.64 | -0.6768 | 0.18157 | -3.7276 | 0.00019  | 0.00136  | 2375.22 | 2964.85 | 2900.93 | 1991.53 | 1306.3  | 1856.98 | Down |
| Mapk8ip2  | 8.62713 | -1.6685 | 0.84085 | -1.9843 | 0.04722  | 0.13051  | 13.545  | 14.3739 | 11.4586 | 7.25701 | 2.11205 | 3.0162  | Down |
| Shank3    | 7662.81 | -0.5625 | 0.16799 | -3.3485 | 0.00081  | 0.00467  | 7702.28 | 8463.34 | 11248.5 | 5383.67 | 6443.87 | 6735.18 | Down |
| Rabl2     | 2123.75 | -0.6872 | 0.17547 | -3.9161 | 9.00E-05 | 0.00069  | 2317.17 | 2862.32 | 2681.31 | 1760.34 | 1250.33 | 1871.05 | Down |
| Syt10     | 85.9069 | -2.004  | 0.35626 | -5.625  | 1.85E-08 | 3.18E-07 | 111.263 | 181.111 | 120.315 | 27.9913 | 28.5127 | 46.2484 | Down |
| Alg10b    | 3485.53 | 0.23296 | 0.07606 | 3.06282 | 0.00219  | 0.01076  | 3202.43 | 3180.46 | 3231.32 | 3720.77 | 3763.67 | 3814.49 | Up   |
| Cpne8     | 2446.11 | 0.25836 | 0.12904 | 2.00218 | 0.04527  | 0.12615  | 2210.74 | 2022.88 | 2449.27 | 2401.03 | 2950.53 | 2642.19 | Up   |
| Kif21a    | 2791.43 | -1.0695 | 0.21942 | -4.8742 | 1.09E-06 | 1.33E-05 | 3229.52 | 4512.44 | 3601.82 | 1714.73 | 1326.37 | 2363.7  | Down |
| Abcd2     | 2003.55 | 0.93288 | 0.23068 | 4.04413 | 5.25E-05 | 0.00043  | 1525.75 | 1531.3  | 1075.2  | 2273.52 | 3552.47 | 2063.08 | Up   |
| Lrrk2     | 14780.5 | 1.78862 | 0.18932 | 9.44763 | 3.47E-21 | 3.37E-19 | 7845.47 | 6155.85 | 5905.95 | 19526.5 | 19961   | 29288.3 | Up   |
| Cntn1     | 312.418 | -0.9822 | 0.30386 | -3.2324 | 0.00123  | 0.00663  | 235.103 | 561.54  | 447.84  | 191.792 | 228.101 | 210.129 | Down |
| Gm26760   | 63.0559 | -3.0658 | 0.87029 | -3.5227 | 0.00043  | 0.00271  | 88.0426 | 196.443 | 53.4734 | 35.2483 | 2.11205 | 3.0162  | Down |
| Pdzrn4    | 29.9493 | -1.6514 | 0.65089 | -2.5371 | 0.01118  | 0.04186  | 30.96   | 85.285  | 20.0525 | 18.6609 | 12.6723 | 12.0648 | Down |
| Gm30085   | 8.03661 | -3.8516 | 1.43108 | -2.6914 | 0.00711  | 0.02892  | 4.83751 | 36.4138 | 3.81953 | 1.03672 | 2.11205 | 0       | Down |
| Zcrb1     | 3840.44 | -0.2774 | 0.09796 | -2.8316 | 0.00463  | 0.02035  | 3849.69 | 4405.12 | 4370.5  | 3507.21 | 3544.02 | 3366.08 | Down |
| Irak4     | 1295.8  | 0.63251 | 0.11854 | 5.33583 | 9.51E-08 | 1.41E-06 | 1108.76 | 938.135 | 1001.67 |         |         |         |      |

|          |         |         |         |         |          |          |         |         |         |         |         |         |      |
|----------|---------|---------|---------|---------|----------|----------|---------|---------|---------|---------|---------|---------|------|
| Rpap3    | 1231.69 | -0.2394 | 0.10571 | -2.2651 | 0.02351  | 0.07586  | 1331.28 | 1371.27 | 1298.64 | 1163.2  | 1044.41 | 1181.35 | Down |
| Rapgef3  | 3212.94 | -0.6057 | 0.11859 | -5.108  | 3.26E-07 | 4.46E-06 | 3759.71 | 3609.76 | 4263.55 | 2327.43 | 2760.45 | 2556.73 | Down |
| Slc48a1  | 8892.78 | -0.3157 | 0.13039 | -2.4215 | 0.01546  | 0.05435  | 11430.1 | 8881.14 | 9274.78 | 7958.87 | 8428.14 | 7383.66 | Down |
| Vdr      | 546.604 | 0.53461 | 0.16587 | 3.22309 | 0.00127  | 0.00682  | 536.963 | 404.385 | 398.186 | 642.764 | 615.663 | 681.662 | Up   |
| Pfkm     | 2033.16 | -1.5021 | 0.27554 | -5.4515 | 4.99E-08 | 7.91E-07 | 2487.45 | 4600.6  | 1927.91 | 1085.44 | 1054.97 | 1042.6  | Down |
| Ccdc184  | 191.978 | -1.5247 | 0.44708 | -3.4103 | 0.00065  | 0.00387  | 128.678 | 350.723 | 375.269 | 120.259 | 125.667 | 51.2754 | Down |
| Zfp641   | 1370.02 | -0.7936 | 0.18527 | -4.2832 | 1.84E-05 | 0.00017  | 1276.13 | 2061.21 | 1875.39 | 992.137 | 1015.9  | 999.368 | Down |
| Cacnb3   | 1596.51 | 0.69    | 0.15362 | 4.49147 | 7.07E-06 | 7.23E-05 | 1436.74 | 1097.21 | 1131.54 | 2138.74 | 2045.52 | 1729.29 | Up   |
| Rnd1     | 724.664 | 0.55597 | 0.21933 | 2.53486 | 0.01125  | 0.0421   | 595.013 | 559.623 | 605.396 | 812.785 | 1145.79 | 629.381 | Up   |
| Ccdc65   | 1090.59 | -0.826  | 0.1986  | -4.159  | 3.20E-05 | 0.00028  | 1302.26 | 1548.55 | 1333.02 | 867.731 | 566.03  | 925.974 | Down |
| Fkbp11   | 546.906 | 0.95741 | 0.25587 | 3.74183 | 0.00018  | 0.00129  | 521.483 | 307.601 | 286.465 | 810.712 | 585.038 | 770.137 | Up   |
| Wnt10b   | 642.275 | -1.521  | 0.2443  | -6.2261 | 4.78E-10 | 1.11E-08 | 666.609 | 1074.21 | 1117.21 | 317.235 | 267.174 | 411.209 | Down |
| Rheb1    | 379.292 | -0.8043 | 0.16327 | -4.9262 | 8.38E-07 | 1.05E-05 | 510.841 | 418.759 | 517.547 | 298.574 | 255.558 | 274.474 | Down |
| Lmbr1l   | 1942.11 | -0.3103 | 0.10447 | -2.9697 | 0.00298  | 0.014    | 1990.15 | 2134.04 | 2326.09 | 1774.86 | 1742.44 | 1685.05 | Down |
| Tuba1b   | 8777.08 | -0.325  | 0.14924 | -2.1778 | 0.02942  | 0.09058  | 7946.09 | 10188.2 | 11150.2 | 8175.54 | 8154.63 | 7047.86 | Down |
| 4930578N | 62.3058 | -1.1785 | 0.30047 | -3.9223 | 8.77E-05 | 0.00068  | 88.0426 | 93.9093 | 77.3455 | 35.2483 | 39.0729 | 40.216  | Down |
| Tuba1c   | 4059.98 | 0.82049 | 0.11775 | 6.968   | 3.21E-12 | 1.06E-10 | 2753.51 | 3014.68 | 3038.44 | 5340.12 | 5647.62 | 4565.53 | Up   |
| Prph     | 100.947 | -1.6305 | 0.46581 | -3.5004 | 0.00046  | 0.00291  | 200.273 | 157.154 | 100.263 | 45.6155 | 80.2579 | 22.1188 | Down |
| Dnajc22  | 73.9216 | 2.82734 | 0.41774 | 6.76824 | 1.30E-11 | 4.03E-10 | 23.22   | 22.9982 | 8.59395 | 121.296 | 104.547 | 162.875 | Up   |
| Spats2   | 1527.63 | 0.73422 | 0.1059  | 6.93321 | 4.11E-12 | 1.34E-10 | 1072.96 | 1153.74 | 1214.61 | 1888.9  | 1823.76 | 2011.81 | Up   |
| Kcnh3    | 665.284 | -0.5859 | 0.13817 | -4.24   | 2.23E-05 | 0.0002   | 822.376 | 775.231 | 798.282 | 528.725 | 468.875 | 598.214 | Down |
| 1700120C | 40.2807 | -1.6784 | 0.58021 | -2.8928 | 0.00382  | 0.01727  | 36.7651 | 108.283 | 39.1502 | 20.7343 | 11.6163 | 25.135  | Down |
| Prpf40b  | 2698.13 | -0.2911 | 0.1057  | -2.7539 | 0.00589  | 0.02481  | 2679.98 | 3133.51 | 3094.78 | 2461.16 | 2338.04 | 2481.33 | Down |
| Tmbim6   | 54428.6 | 0.34635 | 0.07808 | 4.43603 | 9.16E-06 | 9.08E-05 | 49190.7 | 46205.3 | 48383   | 62540.9 | 61801.8 | 58450   | Up   |
| Faim2    | 998.582 | -1.33   | 0.15235 | -8.73   | 2.55E-18 | 1.95E-16 | 1509.3  | 1378.93 | 1397.95 | 521.468 | 681.136 | 502.7   | Down |
| Aqp2     | 33.9799 | -1.9294 | 0.59301 | -3.2536 | 0.00114  | 0.00624  | 62.8876 | 65.1616 | 33.4209 | 25.9179 | 8.4482  | 8.04321 | Down |
| Racgap1  | 422.206 | 0.46188 | 0.17252 | 2.67724 | 0.00742  | 0.02991  | 322.178 | 424.509 | 318.931 | 463.412 | 478.379 | 525.825 | Up   |
| Cox14    | 2315.12 | -0.2053 | 0.10188 | -2.0152 | 0.04388  | 0.12325  | 2450.68 | 2578.67 | 2409.17 | 2295.29 | 2172.24 | 1984.66 | Down |
| Larp4    | 3713.38 | 0.20966 | 0.09611 | 2.18143 | 0.02915  | 0.08996  | 3480.1  | 3220.71 | 3631.42 | 3938.48 | 3828.09 | 4181.46 | Up   |
| Tmprss12 | 27.1757 | -2.0522 | 0.66662 | -3.0785 | 0.00208  | 0.0103   | 31.9275 | 65.1616 | 34.3758 | 7.25701 | 4.2241  | 20.108  | Down |
| Mettl7a1 | 31405.6 | -0.5778 | 0.15388 | -3.7546 | 0.00017  | 0.00124  | 46624.9 | 33908   | 32301.8 | 25582   | 24294.9 | 25722.2 | Down |
| Mettl7a3 | 74.1305 | -1.173  | 0.42063 | -2.7888 | 0.00529  | 0.02272  | 94.8151 | 131.281 | 82.1199 | 59.0928 | 22.1765 | 55.297  | Down |
| Slc11a2  | 4533.2  | -0.4887 | 0.14902 | -3.2796 | 0.00104  | 0.00576  | 5031.98 | 5789.8  | 5059.92 | 3623.32 | 3206.09 | 4488.11 | Down |
| 5330439K | 39.9745 | -1.1668 | 0.50035 | -2.332  | 0.0197   | 0.06604  | 41.6026 | 76.6607 | 47.7441 | 14.514  | 21.1205 | 38.2052 | Down |
| Csrnp2   | 436.934 | -0.4769 | 0.14901 | -3.2004 | 0.00137  | 0.00728  | 513.743 | 459.006 | 552.877 | 358.704 | 342.152 | 395.123 | Down |
| Gm49492  | 261.88  | -0.4338 | 0.19099 | -2.2711 | 0.02314  | 0.07497  | 334.756 | 278.853 | 289.33  | 185.572 | 234.438 | 248.334 | Down |
| Smagp    | 2375.91 | -0.3711 | 0.15894 | -2.3347 | 0.01956  | 0.06564  | 2339.42 | 2468.47 | 3231.32 | 1910.67 | 2315.86 | 1989.69 | Down |
| Bin2     | 1311.61 | 0.78933 | 0.18992 | 4.15612 | 3.24E-05 | 0.00028  | 1102.95 | 985.09  | 796.372 | 1517.75 | 2052.91 | 1414.6  | Up   |
| Cela1    | 140.259 | 1.54994 | 0.22362 | 6.93126 | 4.17E-12 | 1.35E-10 | 81.2701 | 69.9529 | 63.0223 | 200.086 | 229.158 | 198.064 | Up   |
| Galnt6   | 1325.94 | 1.13214 | 0.15648 | 7.23487 | 4.66E-13 | 1.78E-11 | 706.276 | 990.839 | 795.417 | 1821.51 | 1679.08 | 1962.54 | Up   |
| Scn8a    | 43.5403 | 2.185   | 0.40365 | 5.41308 | 6.19E-08 | 9.59E-07 | 19.35   | 16.2904 | 11.4586 | 78.7904 | 76.0338 | 59.3187 | Up   |
| Fignl2   | 709.405 | -0.4269 | 0.14808 | -2.883  | 0.00394  | 0.01774  | 768.196 | 731.151 | 941.515 | 628.25  | 564.974 | 622.343 | Down |
| Acvrl1   | 27407.9 | -0.4829 | 0.14346 | -3.3658 | 0.00076  | 0.00444  | 30846.8 | 27077.5 | 37932.7 | 22432.5 | 24542   | 21616.1 | Down |
| Grasp    | 1584.71 | -0.3877 | 0.12845 | -3.0184 | 0.00254  | 0.01222  | 1763.76 | 1740.2  | 1884.94 | 1267.9  | 1576.65 | 1274.85 | Down |
| Krt7     | 24875.7 | 0.36391 | 0.14276 | 2.54919 | 0.0108   | 0.04077  | 20767.4 | 19867.6 | 24629.3 | 30150.8 | 30258.3 | 23580.7 | Up   |
| Krt87    | 406.903 | 2.43801 | 0.30155 | 8.08481 | 6.23E-16 | 3.60E-14 | 124.808 | 167.695 | 87.8492 | 958.962 | 549.133 | 552.97  | Up   |
| Krt1     | 69.2862 | 1.4358  | 0.37373 | 3.84178 | 0.00012  | 0.0009   | 20.3175 | 49.8294 | 42.0148 | 99.5247 | 103.49  | 100.54  | Up   |
| Krt4     | 15.6963 | 1.96143 | 0.96487 | 2.03284 | 0.04207  | 0.1193   | 7.74001 | 11.4991 | 0       | 20.7343 | 40.129  | 14.0756 | Up   |
| Krt78    | 15.4328 | 1.93212 | 0.70951 | 2.72317 | 0.00647  | 0.02673  | 7.74001 | 9.58259 | 1.90977 | 18.6609 | 29.5687 | 25.135  | Up   |
| Tns2     | 15136.7 | -0.7417 | 0.08991 | -8.2499 | 1.59E-16 | 9.77E-15 | 19265.9 | 17610.9 | 19956.1 | 11494.1 | 11570.9 | 10922.7 | Down |
| Igfbp6   | 7160.23 | -1.3336 | 0.27737 | -4.8079 | 1.53E-06 | 1.81E-05 | 13520.8 | 7809.81 | 9426.6  | 5361.89 | 4351.88 | 2490.38 | Down |
| Soat2    | 84.4203 | 0.9239  | 0.36651 | 2.52082 | 0.01171  | 0.0435   | 55.1476 | 78.5772 | 41.06   | 128.553 | 127.779 | 75.4051 | Up   |
| Csad     | 2566.66 | -0.5251 | 0.10043 | -5.2286 | 1.71E-07 | 2.44E-06 | 2828.97 | 3194.83 | 3062.31 | 2196.8  | 1990.61 | 2126.42 | Down |
| Zfp740   | 5992.02 | -0.4061 | 0.07641 | -5.3146 | 1.07E-07 | 1.57E-06 | 6817.02 | 6709.73 | 6963.01 | 5079.91 | 5068.92 | 5313.54 | Down |
| Rarg     | 4104.46 | -0.3959 | 0.11108 | -3.564  | 0.00037  | 0.00236  | 4674.97 | 4186.63 | 5130.59 | 3626.43 | 3617.94 | 3390.21 | Down |
| Gm9918   | 14.379  | -1.5669 | 0.74453 | -2.1045 | 0.03534  | 0.10404  | 34.8301 | 13.4156 | 16.233  | 4.14686 | 11.6163 | 6.03241 | Down |
| Esp1     | 207.964 | 0.80062 | 0.19173 | 4.17573 | 2.97E-05 | 0.00026  | 141.255 | 159.071 | 154.691 | 298.574 | 262.95  | 231.242 | Up   |
| Amhr2    | 367.188 | 0.5507  | 0.18693 | 2.94612 | 0.00322  | 0.01496  | 269.933 | 329.641 | 294.104 | 429.2   | 514.284 | 365.966 | Up   |
| Prr13    | 6706.26 | 0.4411  | 0.12926 | 3.41241 | 0.00064  | 0.00384  | 5346.41 | 5947.91 | 5772.27 | 7781.59 | 8760.79 | 6628.61 | Up   |
| Pcbp2    | 11530   | -0.2345 | 0.08411 | -2.7875 | 0.00531  | 0.0228   | 13097.1 | 12538.8 | 11758.4 | 10819.2 | 10583.5 | 10382.8 | Down |
| Gm28047  | 324.31  | -0.3816 | 0.18275 | -2.0879 | 0.03681  | 0.10748  | 341.528 | 354.556 | 404.87  | 240.518 | 275.623 | 328.766 | Down |
| Calcoco1 | 6785.99 | -0.2847 | 0.11325 | -2.514  | 0.01194  | 0.04413  | 8138.62 | 7476.33 | 6745.29 | 6547.9  | 6111.22 | 5696.6  | Down |
| Copz1    | 7640.54 | 0.31292 | 0.09872 | 3.16986 | 0.00153  | 0.00794  | 6379.7  | 6802.68 | 7262.84 | 8715.67 | 8781.91 | 7900.44 | Up   |
| Gpr84    | 3.79452 | 4.40051 | 1.69988 | 2.58871 | 0.00963  | 0.03703  | 0       | 0       | 0.95488 | 11.4039 | 7.39218 | 3.0162  | Up   |
| Zfp385a  | 505.022 | 0.53812 | 0.18982 | 2.83494 | 0.00458  | 0.02017  | 476.978 | 415.884 | 342.803 | 624.103 | 672.688 | 497.673 | Up   |
| Nckap1l  | 2384.68 | 1.24996 | 0.18887 | 6.61808 | 3.64E-11 | 1.03E-09 | 1803.42 | 1278.32 | 1153.5  | 3173.39 | 3846.04 | 3053.4  | Up   |
| Pde1b    | 741.809 | 0.41708 | 0.14622 | 2.85237 | 0.00434  | 0.01924  | 724.659 | 610.411 | 571.02  | 777.537 | 854.325 | 912.904 | Up   |
| Ppp1r1a  | 212.59  | -1.6524 | 0.34691 | -4.7632 | 1.91E-06 | 2.21E-05 | 268.965 | 496.378 | 202.435 | 97.4513 | 87.6501 | 122.659 | Down |
| Gm41409  | 45.5307 | 0.79388 | 0.36187 | 2.19385 | 0.02825  | 0.08782  | 41.6026 | 32.5808 | 25.7818 | 53.9092 | 55.9693 | 63.3403 | Up   |
| Cluap1   | 947.903 | -0.4598 | 0.12399 | -3.7084 | 0.00021  | 0.00144  | 1081.67 | 1105.83 | 1105.75 | 859.437 | 702.257 | 832.472 | Down |
| Slx4     | 868.307 | 0.24385 | 0.10867 | 2.24392 | 0.02484  | 0.07925  | 829.149 | 764.69  | 791.598 | 927.861 | 909.238 | 987.304 | Up   |
| Srl      | 1593.59 | -4.4905 | 0.66404 | -6.7625 | 1.36E-11 | 4.16E-10 | 1680.55 | 5939.29 | 1534.5  | 125.443 | 109.827 | 171.924 | Down |
| Tfap4    | 281.249 | -0.6381 | 0.16208 | -3.9372 | 8.24E-05 | 0.00064  | 339.593 | 319.1   | 368.585 | 209.417 | 238.662 | 212.14  | Down |
| Coro7    | 2040.14 | 0.46937 | 0.11039 | 4.2519  | 2.12E-05 | 0.00019  | 1707.64 | 1849.44 | 1576.51 | 2472.57 | 2218.71 | 2415.98 | Up   |
| Cdip1    | 3230.22 | -0.2115 | 0.08394 | -2.5193 | 0.01176  | 0.04366  | 3462.69 | 3445.9  | 3491.05 | 3132.96 | 2879.78 | 2968.95 | Down |
| 4930562C | 968.084 | -0.951  | 0.20596 | -4.6172 | 3.89E-06 | 4.22E-05 | 1294.52 | 1285.98 | 1248.03 | 658.315 | 473.099 | 848.558 | Down |
| Mgrn1    | 2746.08 | 0.39218 | 0.0868  | 4.51836 | 6.23E-06 | 6.44E-05 | 2431.33 | 2421.   |         |         |         |         |      |

|           |         |         |         |         |          |          |         |         |         |         |         |         |      |
|-----------|---------|---------|---------|---------|----------|----------|---------|---------|---------|---------|---------|---------|------|
| Mettl22   | 486.665 | -0.3301 | 0.16311 | -2.0241 | 0.04296  | 0.12122  | 491.491 | 610.411 | 524.231 | 450.971 | 468.875 | 374.009 | Down |
| Abat      | 422.433 | -1.1678 | 0.31395 | -3.7199 | 0.0002   | 0.00139  | 397.643 | 921.845 | 434.472 | 241.555 | 255.558 | 283.523 | Down |
| Pmm2      | 2950.31 | 0.3839  | 0.09716 | 3.95127 | 7.77E-05 | 0.00061  | 2396.5  | 2543.22 | 2740.51 | 3410.8  | 3215.6  | 3395.24 | Up   |
| Atf7ip2   | 37.7214 | 4.10073 | 0.62353 | 6.57667 | 4.81E-11 | 1.34E-09 | 0       | 7.66607 | 4.77441 | 65.3131 | 79.2019 | 69.3727 | Up   |
| Nubp1     | 323.137 | 0.62766 | 0.17746 | 3.537   | 0.0004   | 0.00258  | 286.38  | 230.94  | 244.45  | 350.41  | 444.587 | 382.052 | Up   |
| Ciita     | 74.8483 | 1.30139 | 0.2844  | 4.57585 | 4.74E-06 | 5.04E-05 | 40.6351 | 40.2469 | 48.699  | 101.598 | 120.387 | 97.5239 | Up   |
| Clec16a   | 1981.48 | 0.43279 | 0.09725 | 4.45012 | 8.58E-06 | 8.58E-05 | 1601.21 | 1744.99 | 1713.06 | 2251.75 | 2397.18 | 2180.71 | Up   |
| Gspt1     | 171.658 | 0.45113 | 0.22241 | 2.02841 | 0.04252  | 0.1202   | 165.443 | 132.24  | 137.503 | 164.838 | 201.701 | 228.226 | Up   |
| Tnfrsf17  | 15.9031 | 1.5709  | 0.59189 | 2.65405 | 0.00795  | 0.03167  | 9.67501 | 8.62433 | 5.7293  | 24.8812 | 26.4006 | 20.108  | Up   |
| Snx29     | 368.349 | 0.44041 | 0.19885 | 2.21481 | 0.02677  | 0.08408  | 362.813 | 268.312 | 306.517 | 357.667 | 500.556 | 414.225 | Up   |
| Cpped1    | 2131.76 | 0.22161 | 0.1011  | 2.19188 | 0.02839  | 0.08814  | 2009.5  | 2079.42 | 1816.19 | 2207.17 | 2330.65 | 2347.61 | Up   |
| Shisa9    | 79.3305 | -1.6382 | 0.28476 | -5.7528 | 8.78E-09 | 1.62E-07 | 131.58  | 116.908 | 111.721 | 44.5788 | 38.0169 | 33.1782 | Down |
| 2310015D  | 13.9878 | -3.2022 | 1.02149 | -3.1349 | 0.00172  | 0.00877  | 6.77251 | 55.579  | 13.3684 | 2.07343 | 2.11205 | 4.0216  | Down |
| Pla2g10   | 26.8762 | 1.364   | 0.56623 | 2.40893 | 0.016    | 0.05589  | 13.545  | 23.9565 | 7.63906 | 39.3952 | 27.4567 | 49.2646 | Up   |
| Pla2g10os | 6.2784  | 2.20298 | 1.07308 | 2.05295 | 0.04008  | 0.11471  | 1.935   | 3.83303 | 0.95488 | 17.6242 | 5.28013 | 8.04321 | Up   |
| A930007A  | 389.786 | 0.97392 | 0.19615 | 4.96507 | 6.87E-07 | 8.82E-06 | 236.07  | 308.559 | 244.45  | 534.945 | 424.522 | 590.17  | Up   |
| Rrn3      | 2046.35 | 0.21386 | 0.09645 | 2.21736 | 0.0266   | 0.08366  | 1971.77 | 1831.23 | 1882.07 | 2125.27 | 2134.23 | 2333.54 | Up   |
| Pdxdc1    | 4035.16 | 0.47214 | 0.10163 | 4.64589 | 3.39E-06 | 3.73E-05 | 3601.04 | 3358.7  | 3182.62 | 4518.01 | 4514.51 | 5036.05 | Up   |
| Nde1      | 3339.55 | -0.2528 | 0.0941  | -2.6862 | 0.00723  | 0.02927  | 3667.8  | 3404.69 | 3821.44 | 3034.47 | 3168.08 | 2940.8  | Down |
| Myh11     | 4175.16 | -1.3097 | 0.21515 | -6.0874 | 1.15E-09 | 2.52E-08 | 4125.43 | 7596.12 | 6128.44 | 2161.55 | 2756.17 | 2284.27 | Down |
| Abcc1     | 2874.16 | 0.39633 | 0.15058 | 2.63206 | 0.00849  | 0.03336  | 2721.58 | 2547.05 | 2177.13 | 3249.07 | 2787.91 | 3762.21 | Up   |
| Pkp2      | 3683.5  | 0.35023 | 0.08988 | 3.89687 | 9.74E-05 | 0.00074  | 3330.14 | 3294.49 | 3090.96 | 4124.06 | 4320.2  | 3941.17 | Up   |
| Ppm1f     | 5639.11 | -0.4102 | 0.14815 | -2.7686 | 0.00563  | 0.02394  | 5952.16 | 5933.54 | 7780.39 | 4529.41 | 5084.76 | 4914.4  | Down |
| Mapk1     | 9328.97 | 0.25611 | 0.08628 | 2.96835 | 0.00299  | 0.01405  | 9014.21 | 8235.27 | 8259.74 | 9816.66 | 10507.5 | 10140.5 | Up   |
| 2610318N  | 28.0523 | 1.24547 | 0.57195 | 2.17758 | 0.02944  | 0.0906   | 11.61   | 26.8312 | 11.4586 | 35.2483 | 57.0254 | 26.1404 | Up   |
| Sdf2l1    | 1065.68 | 0.91729 | 0.11183 | 8.2023  | 2.36E-16 | 1.42E-14 | 681.121 | 746.483 | 785.869 | 1437.92 | 1404.51 | 1338.19 | Up   |
| Cdccl116  | 116.802 | 1.23082 | 0.2724  | 4.51845 | 6.23E-06 | 6.44E-05 | 74.4976 | 73.7859 | 61.1125 | 207.343 | 137.283 | 146.789 | Up   |
| Ydjc      | 148.881 | 0.9851  | 0.27405 | 3.5946  | 0.00032  | 0.00213  | 113.198 | 116.908 | 69.7065 | 227.041 | 198.533 | 167.902 | Up   |
| Ube2l3    | 320.7   | 0.52662 | 0.15617 | 3.37201 | 0.00075  | 0.00435  | 268.965 | 273.104 | 246.36  | 417.796 | 359.049 | 358.928 | Up   |
| Tmem191   | 134.514 | -0.5966 | 0.22635 | -2.636  | 0.00839  | 0.03305  | 161.573 | 140.864 | 183.338 | 118.186 | 105.603 | 97.5239 | Down |
| Pi4ka     | 2247.24 | 0.49358 | 0.13807 | 3.5749  | 0.00035  | 0.00227  | 2184.62 | 1743.07 | 1672    | 2436.28 | 2730.88 | 2716.59 | Up   |
| Snap29    | 2481.59 | 0.50423 | 0.11977 | 4.21011 | 2.55E-05 | 0.00023  | 2247.51 | 1909.81 | 1999.52 | 2658.14 | 3164.91 | 2909.63 | Up   |
| Aifm3     | 292.484 | 1.08307 | 0.26184 | 4.13633 | 3.53E-05 | 0.0003   | 198.338 | 201.234 | 163.285 | 371.144 | 283.015 | 537.889 | Up   |
| Lztr1     | 5477.85 | 0.31058 | 0.09409 | 3.30076 | 0.00096  | 0.00542  | 5186.78 | 4618.81 | 4866.08 | 6074.12 | 5771.18 | 6350.11 | Up   |
| Lrrc74b   | 1818.84 | -0.592  | 0.2876  | -2.0585 | 0.03954  | 0.11348  | 1791.81 | 2538.43 | 2230.61 | 1639.05 | 787.795 | 1925.34 | Down |
| P2rx6     | 1124.1  | -0.396  | 0.14499 | -2.7316 | 0.0063   | 0.02621  | 1305.16 | 1303.23 | 1224.16 | 1038.79 | 801.523 | 1071.76 | Down |
| Slc7a4    | 64.9619 | -1.3214 | 0.42619 | -3.1005 | 0.00193  | 0.00969  | 76.4326 | 136.073 | 65.8869 | 23.8445 | 43.297  | 44.2376 | Down |
| Cdc674a   | 892.475 | -0.4722 | 0.18605 | -2.5383 | 0.01114  | 0.04175  | 1029.42 | 1058.88 | 1023.63 | 883.282 | 552.301 | 807.337 | Down |
| Med15     | 3706.5  | 0.31725 | 0.09846 | 3.22197 | 0.00127  | 0.00684  | 3388.19 | 3292.58 | 3220.82 | 4251.57 | 4328.65 | 3757.18 | Up   |
| Khlh22    | 2072.3  | 0.32194 | 0.11844 | 2.71809 | 0.00657  | 0.02705  | 1931.13 | 1793.86 | 1800.91 | 2336.76 | 2529.18 | 2041.97 | Up   |
| AA914427  | 24.4473 | -1.5595 | 0.49858 | -3.1278 | 0.00176  | 0.00896  | 42.5701 | 33.5391 | 33.4209 | 8.29373 | 14.7844 | 14.0756 | Down |
| Slc25a1   | 4552.29 | 0.70319 | 0.1462  | 4.80983 | 1.51E-06 | 1.79E-05 | 3277.89 | 4112.85 | 3002.15 | 5286.21 | 6168.24 | 5466.36 | Up   |
| Prodh     | 1953.69 | -0.5581 | 0.09236 | -6.0421 | 1.52E-09 | 3.25E-08 | 2252.34 | 2341.98 | 2386.25 | 1530.19 | 1659.02 | 1552.34 | Down |
| 49334321C | 24.403  | -1.6669 | 0.50297 | -3.3142 | 0.00092  | 0.00519  | 32.895  | 47.9129 | 30.5563 | 10.3672 | 11.6163 | 13.0702 | Down |
| Zdhhc8    | 2991.05 | -0.2064 | 0.08799 | -2.3454 | 0.01901  | 0.06417  | 3245    | 3124.88 | 3243.74 | 2848.9  | 2858.66 | 2625.1  | Down |
| Tango2    | 1689.84 | -0.6576 | 0.13879 | -4.7381 | 2.16E-06 | 2.47E-05 | 1941.78 | 2407.15 | 1856.29 | 1389.2  | 1320.03 | 1224.58 | Down |
| Arvcf     | 1687.06 | -0.5317 | 0.12425 | -4.2792 | 1.88E-05 | 0.00017  | 2012.4  | 1971.14 | 1999.52 | 1458.66 | 1494.28 | 1186.37 | Down |
| Comt      | 5257.12 | 0.24921 | 0.08491 | 2.93488 | 0.00334  | 0.01542  | 4745.59 | 5053.86 | 4613.04 | 5610.71 | 5886.29 | 5633.26 | Up   |
| Gnb1l     | 413.445 | -0.3213 | 0.13673 | -2.3502 | 0.01876  | 0.06356  | 464.401 | 440.799 | 472.667 | 341.08  | 390.729 | 370.993 | Down |
| Tbx1      | 1560.17 | -1.3947 | 0.22946 | -6.0781 | 1.22E-09 | 2.66E-08 | 1921.46 | 2493.39 | 2367.15 | 976.586 | 562.862 | 1039.58 | Down |
| 4930588K  | 55.6463 | -1.7876 | 0.41585 | -4.2987 | 1.72E-05 | 0.00016  | 63.8551 | 96.7841 | 98.3529 | 25.9179 | 14.7844 | 34.1836 | Down |
| Cldn5     | 17892.1 | -0.8984 | 0.20902 | -4.2983 | 1.72E-05 | 0.00016  | 16835.5 | 25254.9 | 27778.5 | 13026.3 | 14528.8 | 9928.33 | Down |
| Gm28539   | 139.018 | -0.9957 | 0.21504 | -4.4442 | 8.82E-06 | 8.79E-05 | 197.37  | 191.652 | 161.375 | 98.488  | 88.7061 | 96.5185 | Down |
| Iglc2     | 300.021 | 0.78636 | 0.18037 | 4.35965 | 1.30E-05 | 0.00012  | 240.908 | 195.485 | 224.397 | 371.144 | 336.872 | 431.317 | Up   |
| Iglv2     | 134.71  | 2.08458 | 0.44033 | 4.7341  | 2.20E-06 | 2.51E-05 | 21.285  | 44.0799 | 88.8041 | 230.151 | 181.636 | 242.302 | Up   |
| Olfir171  | 60.1268 | 1.14285 | 0.40249 | 2.83946 | 0.00452  | 0.01993  | 53.2126 | 21.0817 | 38.1953 | 73.6068 | 78.1459 | 96.5185 | Up   |
| Lamp3     | 58428.8 | 2.12091 | 0.17189 | 12.339  | 5.58E-35 | 1.72E-32 | 27284.5 | 17681.8 | 20565.3 | 84400.1 | 98227.3 | 102414  | Up   |
| Map6d1    | 23.1697 | -1.5623 | 0.57901 | -2.6983 | 0.00697  | 0.02842  | 47.4076 | 25.873  | 30.5563 | 6.2203  | 16.8964 | 12.0648 | Down |
| Cyp2ab1   | 154.33  | 1.59135 | 0.31343 | 5.07723 | 3.83E-07 | 5.16E-06 | 102.555 | 65.1616 | 63.0223 | 170.021 | 302.023 | 223.199 | Up   |
| Abcc5     | 8409.58 | 0.53093 | 0.08439 | 6.29132 | 3.15E-10 | 7.64E-09 | 6877    | 6621.57 | 7139.66 | 9457.96 | 10148.4 | 10212.9 | Up   |
| Abcf3     | 2744.88 | -0.2256 | 0.10171 | -2.2182 | 0.02654  | 0.08355  | 2918.95 | 2845.07 | 3112.92 | 2629.11 | 2633.73 | 2329.51 | Down |
| Eif4g1    | 14643.3 | 0.22511 | 0.08077 | 2.7872  | 0.00532  | 0.02281  | 13339.9 | 13133.9 | 14035.8 | 15122.6 | 15949.2 | 16278.4 | Up   |
| Fam131a   | 932.601 | -0.4421 | 0.1392  | -3.1761 | 0.00149  | 0.00781  | 1077.8  | 1079    | 1066.6  | 858.401 | 664.24  | 849.564 | Down |
| Ephb3     | 2547.72 | 0.32288 | 0.12664 | 2.5497  | 0.01078  | 0.04072  | 2361.67 | 2118.71 | 2310.82 | 2939.09 | 3107.88 | 2448.15 | Up   |
| Ehhadh    | 953.292 | 0.37038 | 0.12556 | 2.94988 | 0.00318  | 0.01481  | 817.539 | 897.888 | 779.184 | 1084.4  | 1158.46 | 982.277 | Up   |
| Map3k13   | 593.6   | 0.95704 | 0.17879 | 5.35281 | 8.66E-08 | 1.30E-06 | 499.231 | 354.556 | 357.126 | 746.435 | 852.212 | 752.04  | Up   |
| Tmem41a   | 1263.03 | -0.4564 | 0.16391 | -2.7846 | 0.00536  | 0.02296  | 1221.95 | 1542.8  | 1618.53 | 1093.74 | 1193.31 | 907.877 | Down |
| Etv5      | 9490.69 | 1.32846 | 0.26785 | 4.95971 | 7.06E-07 | 9.05E-06 | 7648.1  | 3509.14 | 5059.92 | 13737.5 | 16640.8 | 10348.6 | Up   |
| Dgkg      | 272.101 | 0.99527 | 0.29827 | 3.33686 | 0.00085  | 0.00484  | 264.128 | 150.447 | 130.819 | 336.933 | 445.643 | 304.636 | Up   |
| Dnajb11   | 5744.85 | 0.39769 | 0.0905  | 4.3944  | 1.11E-05 | 0.00011  | 4912    | 4746.26 | 5215.57 | 6684.74 | 6735.33 | 6175.17 | Up   |
| Kng2      | 3568.5  | 5.84825 | 0.70196 | 8.33128 | 8.00E-17 | 5.18E-15 | 136.418 | 194.527 | 34.3758 | 7014.42 | 9267.68 | 4763.59 | Up   |
| Kng1      | 219.751 | 6.59881 | 1.00632 | 6.55736 | 5.48E-11 | 1.52E-09 | 5.80501 | 7.66607 | 0       | 322.419 | 720.209 | 262.41  | Up   |
| Eif4a2    | 37065.8 | 0.31856 | 0.08957 | 3.55652 | 0.00038  | 0.00242  | 32616.4 | 31638.8 | 34714.8 | 39732.1 | 43792.3 | 39900.3 | Up   |
| Rfc4      | 419.712 | 0.58679 | 0.13944 | 4.20812 | 2.58E-05 | 0.00023  | 367.651 | 315.267 | 323.705 | 491.403 | 498.444 | 521.803 | Up   |
| Adipoq    | 595.583 | -8.4315 | 0.89784 | -9.3908 | 5.95E-21 | 5.61E-19 | 639.518 | 2386.06 | 537.599 | 2.07343 | 4.2241  | 4.0216  | Down |
| B630019A  | 149.007 | -0.4786 | 0.24376 | -1.9634 | 0.0496   | 0.13595  | 178.988 | 181.111 | 160.42  | 92.2677 | 141.507 | 139.751 | Down |
| Rtp4      | 1902.65 | 0.45076 | 0.149   |         |          |          |         |         |         |         |         |         |      |

|          |         |         |         |         |          |          |         |         |         |         |         |         |      |
|----------|---------|---------|---------|---------|----------|----------|---------|---------|---------|---------|---------|---------|------|
| Atp13a4  | 424.42  | 1.17669 | 0.23319 | 5.04597 | 4.51E-07 | 6.00E-06 | 279.608 | 274.062 | 227.262 | 710.15  | 645.231 | 410.204 | Up   |
| Gm49636  | 1.71986 | 4.2836  | 2.17576 | 1.96878 | 0.04898  | NA       | 0       | 0       | 0       | 2.07343 | 4.2241  | 4.0216  | Up   |
| 4632428C | 791.016 | 0.66395 | 0.15866 | 4.18484 | 2.85E-05 | 0.00025  | 645.323 | 606.578 | 584.388 | 891.576 | 1161.63 | 856.602 | Up   |
| 9030404E | 213.33  | 1.05018 | 0.2383  | 4.40697 | 1.05E-05 | 0.0001   | 146.093 | 123.615 | 147.052 | 233.261 | 368.553 | 261.404 | Up   |
| Hes1     | 5281.59 | -0.3804 | 0.08448 | -4.5033 | 6.69E-06 | 6.87E-05 | 5887.25 | 6311.09 | 5723.57 | 4513.86 | 4635.95 | 4617.81 | Down |
| Cpn2     | 249.831 | 4.14936 | 0.90426 | 4.58866 | 4.46E-06 | 4.77E-05 | 48.3751 | 27.7895 | 3.81953 | 542.202 | 274.567 | 602.235 | Up   |
| Gp5      | 154.204 | -1.4247 | 0.34054 | -4.1836 | 2.87E-05 | 0.00025  | 134.483 | 294.185 | 245.405 | 105.745 | 76.0338 | 69.3727 | Down |
| Atp13a3  | 16347.1 | 0.47125 | 0.10751 | 4.38313 | 1.17E-05 | 0.00011  | 14816.3 | 13293   | 12993.1 | 19381.4 | 17293.5 | 20305.1 | Up   |
| Acap2    | 6379.06 | -0.2578 | 0.09587 | -2.6892 | 0.00716  | 0.02905  | 6574.17 | 6839.09 | 7428.99 | 5715.41 | 6139.73 | 5576.96 | Down |
| Gm41442  | 433.818 | -0.9636 | 0.20495 | -4.7016 | 2.58E-06 | 2.91E-05 | 532.126 | 468.588 | 719.982 | 278.877 | 274.567 | 328.766 | Down |
| Ppp1r2   | 15960.4 | -0.3905 | 0.11074 | -3.5265 | 0.00042  | 0.00267  | 16185.3 | 18354.5 | 19782.3 | 13162.1 | 14645   | 13633.2 | Down |
| Gm49767  | 220.867 | -0.4891 | 0.18181 | -2.6903 | 0.00714  | 0.02899  | 250.583 | 264.479 | 258.773 | 157.581 | 202.757 | 191.026 | Down |
| Apod     | 385.5   | -1.3343 | 0.32356 | -4.1238 | 3.73E-05 | 0.00032  | 392.806 | 852.85  | 410.6   | 176.242 | 208.037 | 272.464 | Down |
| Gm46560  | 6.28095 | 1.96648 | 0.95122 | 2.06732 | 0.0387   | 0.11164  | 1.935   | 1.91652 | 3.81953 | 8.29373 | 12.6723 | 9.04861 | Up   |
| Senp5    | 692.454 | 0.49554 | 0.15878 | 3.12098 | 0.0018   | 0.00913  | 643.388 | 519.376 | 561.471 | 729.848 | 765.618 | 935.023 | Up   |
| Pak2     | 7972.47 | 0.24856 | 0.08904 | 2.79153 | 0.00525  | 0.02256  | 7507.81 | 6904.25 | 7450    | 8225.3  | 9062.81 | 8684.65 | Up   |
| Nrros    | 2170.47 | 0.47617 | 0.13986 | 3.40466 | 0.00066  | 0.00394  | 1826.64 | 1800.57 | 1819.05 | 2422.8  | 2979.05 | 2174.68 | Up   |
| Smco1    | 26.4514 | -5.2206 | 0.94979 | -5.4966 | 3.87E-08 | 6.25E-07 | 36.7651 | 87.2015 | 30.5563 | 2.07343 | 2.11205 | 0       | Down |
| Ubxn7    | 3366.18 | -0.2107 | 0.08478 | -2.4852 | 0.01295  | 0.04719  | 3661.03 | 3439.19 | 3734.55 | 3118.44 | 3068.81 | 3175.06 | Down |
| Tm4sf19  | 4.10416 | 2.91885 | 1.34671 | 2.1674  | 0.0302   | 0.09222  | 0       | 0.95826 | 1.90977 | 6.2203  | 9.50423 | 6.03241 | Up   |
| Gm20056  | 19.3124 | 2.01078 | 0.55039 | 3.65334 | 0.00026  | 0.00174  | 6.77251 | 8.62433 | 7.63906 | 25.9179 | 32.7368 | 34.1836 | Up   |
| Tfrc     | 7523.36 | 1.10537 | 0.15213 | 7.26602 | 3.70E-13 | 1.43E-11 | 4861.69 | 4545.98 | 4915.74 | 8815.19 | 9403.91 | 12597.7 | Up   |
| Tnk2     | 2428.74 | -0.2049 | 0.09271 | -2.2102 | 0.02709  | 0.08484  | 2462.29 | 2605.51 | 2734.78 | 2265.22 | 2315.86 | 2188.76 | Down |
| Muc4     | 3716.01 | 1.45467 | 0.19495 | 7.46167 | 8.54E-14 | 3.67E-12 | 1861.47 | 2522.14 | 1576.51 | 5287.25 | 4684.53 | 6364.19 | Up   |
| Muc20    | 3419.36 | 2.29412 | 0.21774 | 10.5361 | 5.89E-26 | 8.64E-24 | 820.441 | 1509.26 | 1144.9  | 5962.15 | 4758.45 | 6320.96 | Up   |
| Smbd1    | 73.9268 | 2.0477  | 0.29818 | 6.86723 | 6.55E-12 | 2.09E-10 | 24.1875 | 33.5391 | 28.6465 | 127.516 | 114.051 | 115.621 | Up   |
| Snx4     | 7539.23 | 0.50915 | 0.09382 | 5.42687 | 5.74E-08 | 8.99E-07 | 6331.33 | 5920.12 | 6415.86 | 8906.43 | 9391.23 | 8270.43 | Up   |
| Gm15657  | 553.575 | -0.6819 | 0.20966 | -3.2525 | 0.00114  | 0.00626  | 543.736 | 636.284 | 866.079 | 468.596 | 365.385 | 441.371 | Down |
| Muc13    | 592.623 | 5.41365 | 0.63919 | 8.46961 | 2.46E-17 | 1.72E-15 | 18.3825 | 24.9147 | 38.1953 | 1876.46 | 465.707 | 1132.08 | Up   |
| Kalrn    | 1600.07 | 0.49598 | 0.13221 | 3.75146 | 0.00018  | 0.00125  | 1414.49 | 1305.15 | 1263.31 | 1808.03 | 2138.45 | 1670.98 | Up   |
| Ccdc14   | 537.802 | -0.6096 | 0.13857 | -4.3994 | 1.09E-05 | 0.00011  | 574.696 | 693.779 | 680.832 | 417.796 | 421.354 | 438.355 | Down |
| Adcy5    | 1385.54 | -0.8509 | 0.2072  | -4.1068 | 4.01E-05 | 0.00034  | 1484.15 | 2264.37 | 1599.43 | 1117.58 | 1065.53 | 782.202 | Down |
| Sec22a   | 1611.96 | 0.21336 | 0.10347 | 2.06214 | 0.03919  | 0.11271  | 1444.48 | 1515.01 | 1519.22 | 1710.58 | 1861.77 | 1620.71 | Up   |
| Pdia5    | 832.333 | -0.6025 | 0.1524  | -3.9532 | 7.71E-05 | 0.0006   | 900.744 | 989.881 | 1120.08 | 722.591 | 690.641 | 570.062 | Down |
| Parp14   | 5020.24 | 0.54231 | 0.11121 | 4.87648 | 1.08E-06 | 1.32E-05 | 4162.19 | 3966.23 | 4134.64 | 5293.47 | 6006.67 | 6558.23 | Up   |
| Dtx3l    | 2437.3  | 1.03482 | 0.10903 | 9.49151 | 2.28E-21 | 2.26E-19 | 1702.8  | 1607.96 | 1485.8  | 3016.84 | 3414.13 | 3396.24 | Up   |
| Parp9    | 1335.78 | 0.90787 | 0.12601 | 7.205   | 5.80E-13 | 2.18E-11 | 1040.06 | 822.186 | 924.327 | 1681.55 | 1729.77 | 1816.76 | Up   |
| Fam162a  | 2271.32 | 0.29231 | 0.12884 | 2.26885 | 0.02328  | 0.0753   | 1908.88 | 2211.66 | 2005.25 | 2376.15 | 2840.71 | 2285.28 | Up   |
| Csta2    | 154.443 | 0.78708 | 0.2263  | 3.47808 | 0.00051  | 0.00313  | 109.328 | 128.407 | 102.172 | 193.866 | 225.989 | 166.897 | Up   |
| Cd86     | 568.092 | 1.07026 | 0.23716 | 4.51286 | 6.40E-06 | 6.59E-05 | 481.816 | 298.977 | 318.931 | 638.617 | 718.097 | 952.115 | Up   |
| Ildr1    | 1809.73 | 0.7571  | 0.16849 | 4.49337 | 7.01E-06 | 7.18E-05 | 1258.72 | 1639.58 | 1138.22 | 2407.25 | 1990.61 | 2424.02 | Up   |
| Golgb1   | 5797.31 | 0.37835 | 0.09497 | 3.98372 | 6.78E-05 | 0.00054  | 4992.31 | 4867    | 5265.22 | 6745.91 | 6061.59 | 6851.81 | Up   |
| Hcls1    | 1777.78 | 1.23833 | 0.20492 | 6.04307 | 1.51E-09 | 3.23E-08 | 1369.98 | 989.881 | 815.47  | 2272.48 | 2911.46 | 2307.39 | Up   |
| Fbxo40   | 234.982 | -3.5063 | 0.81676 | -4.293  | 1.76E-05 | 0.00016  | 198.338 | 923.761 | 173.789 | 31.1015 | 30.6247 | 52.2808 | Down |
| Ndufb4   | 1975.88 | -0.2378 | 0.10646 | -2.2333 | 0.02553  | 0.08097  | 1973.7  | 2191.54 | 2249.7  | 1923.11 | 1726.6  | 1790.62 | Down |
| Gsk3b    | 5569.96 | 0.54253 | 0.09952 | 5.4516  | 4.99E-08 | 7.91E-07 | 4915.87 | 4363.91 | 4324.66 | 6459.78 | 6979.27 | 6376.25 | Up   |
| Popdc2   | 1251.42 | -1.9983 | 0.28301 | -7.0609 | 1.65E-12 | 5.75E-11 | 1438.67 | 3096.13 | 1470.52 | 500.734 | 547.021 | 455.447 | Down |
| Pla1a    | 209.119 | 1.01436 | 0.34456 | 2.94392 | 0.00324  | 0.01503  | 187.695 | 137.031 | 90.7139 | 337.969 | 327.368 | 173.934 | Up   |
| Cd80     | 319.576 | 0.67912 | 0.21541 | 3.15267 | 0.00162  | 0.00835  | 316.373 | 210.817 | 210.074 | 388.768 | 360.105 | 431.317 | Up   |
| B4galt4  | 4399.18 | -0.2969 | 0.11506 | -2.58   | 0.00988  | 0.03783  | 4279.26 | 5083.56 | 5187.88 | 3942.63 | 3739.39 | 4162.36 | Down |
| Upk1b    | 3066.42 | -0.6616 | 0.14901 | -4.4397 | 9.01E-06 | 8.94E-05 | 3850.66 | 3792.79 | 3628.55 | 2773.21 | 2430.97 | 1922.33 | Down |
| Lsmp     | 69.7195 | -1.5144 | 0.46188 | -3.2786 | 0.00104  | 0.00577  | 64.8226 | 160.029 | 84.9846 | 52.8725 | 27.4567 | 28.1512 | Down |
| Zbtb20   | 5459.66 | -0.5225 | 0.12563 | -4.159  | 3.20E-05 | 0.00028  | 6006.25 | 6956.96 | 6349.97 | 4003.8  | 5073.72 | 5073.25 | Down |
| Qtrt2    | 1039.91 | -0.3907 | 0.10565 | -3.6981 | 0.00022  | 0.00149  | 1143.59 | 1175.78 | 1220.34 | 856.327 | 892.341 | 951.109 | Down |
| Ccdc191  | 1182.28 | -0.4997 | 0.16778 | -2.9785 | 0.0029   | 0.01365  | 1284.84 | 1383.73 | 1486.75 | 1023.24 | 773.011 | 1142.14 | Down |
| Zdhhc23  | 1127.25 | 0.49206 | 0.12339 | 3.98798 | 6.66E-05 | 0.00053  | 892.036 | 885.431 | 1033.18 | 1250.28 | 1280.96 | 1421.64 | Up   |
| Atp6v1a  | 9285.86 | 0.71656 | 0.11613 | 6.1703  | 6.82E-10 | 1.54E-08 | 7860.95 | 6462.5  | 6754.84 | 10644   | 12080.9 | 11912   | Up   |
| Naa50    | 5884.18 | 0.35918 | 0.08858 | 4.055   | 5.01E-05 | 0.00041  | 5332.87 | 4946.53 | 5186.92 | 6292.87 | 6965.54 | 6580.35 | Up   |
| Sid1t    | 750.767 | 1.15869 | 0.11457 | 10.113  | 4.84E-24 | 5.90E-22 | 488.588 | 461.881 | 443.066 | 998.357 | 1077.15 | 1035.56 | Up   |
| Boc      | 2385.38 | -0.3878 | 0.13946 | -2.7805 | 0.00543  | 0.0232   | 2598.71 | 2955.27 | 2558.13 | 2412.44 | 1874.45 | 1913.28 | Down |
| Nepro    | 416.637 | 0.4037  | 0.14642 | 2.75722 | 0.00583  | 0.02463  | 350.236 | 323.891 | 402.006 | 473.779 | 478.379 | 471.533 | Up   |
| Cd200r1  | 688.443 | 2.36491 | 0.28828 | 8.20338 | 2.34E-16 | 1.42E-14 | 341.528 | 174.403 | 155.646 | 1151.79 | 1340.1  | 967.196 | Up   |
| Gm19142  | 25.2215 | 2.08618 | 0.70148 | 2.97399 | 0.00294  | 0.01383  | 10.6425 | 16.2904 | 1.90977 | 35.2483 | 58.0814 | 29.1566 | Up   |
| Cd200r4  | 948.331 | 2.56321 | 0.57017 | 4.49552 | 6.94E-06 | 7.11E-05 | 488.588 | 182.069 | 152.781 | 1586.18 | 2091.99 | 1188.38 | Up   |
| Cd200r2  | 69.4143 | 3.79563 | 0.87185 | 4.35355 | 1.34E-05 | 0.00013  | 22.2525 | 3.83303 | 1.90977 | 95.3779 | 262.95  | 30.162  | Up   |
| Gm6030   | 47.1213 | -0.9321 | 0.36239 | -2.5721 | 0.01011  | 0.03857  | 74.4976 | 58.4538 | 52.5186 | 29.028  | 39.0729 | 29.1566 | Down |
| Gcsam    | 158.583 | 0.83492 | 0.21986 | 3.79749 | 0.00015  | 0.00106  | 117.068 | 102.534 | 122.225 | 168.985 | 216.485 | 224.204 | Up   |
| BC016579 | 51.2336 | 2.33633 | 0.46968 | 4.97433 | 6.55E-07 | 8.44E-06 | 9.67501 | 15.3321 | 25.7818 | 111.965 | 60.1934 | 84.4537 | Up   |
| Tagln3   | 72.0922 | -1.257  | 0.39148 | -3.2109 | 0.00132  | 0.00707  | 81.2701 | 85.285  | 138.458 | 27.9913 | 42.241  | 57.3078 | Down |
| Phldb2   | 12849.9 | 0.46894 | 0.12771 | 3.67191 | 0.00024  | 0.00163  | 10740.2 | 9573    | 12025.8 | 13618.3 | 14670.3 | 16471.5 | Up   |
| Gm7204   | 225.546 | 0.45588 | 0.18281 | 2.49369 | 0.01264  | 0.04628  | 211.883 | 190.693 | 168.059 | 283.023 | 250.278 | 249.339 | Up   |
| Morc1    | 177.493 | 1.8746  | 0.47714 | 3.92885 | 8.54E-05 | 0.00066  | 35.7976 | 133.198 | 59.2027 | 293.391 | 156.292 | 387.079 | Up   |
| Retnlb   | 8.49368 | 5.5969  | 1.47735 | 3.78847 | 0.00015  | 0.00109  | 0.9675  | 0       | 0       | 15.5507 | 26.4006 | 8.04321 | Up   |
| Retnla   | 45695.9 | 4.28463 | 0.24104 | 17.7759 | 1.09E-70 | 3.35E-67 | 5451.87 | 4085.06 | 3844.36 | 85946.9 | 116939  | 57908.1 | Up   |
| Cip2a    | 226.884 | 0.66159 | 0.1838  | 3.59943 | 0.00032  | 0.00209  | 192.533 | 177.278 | 157.556 | 260.216 | 265.062 | 308.658 | Up   |
| Gm9575   | 103.731 | -0.5572 | 0.23415 | -2.3797 | 0.01733  | 0.05958  | 116.1   | 128.407 | 126.045 | 93.3044 | 77.0899 | 81.4375 | Down |
| Cblb     | 3009.02 | -0.3153 | 0.095   |         |          |          |         |         |         |         |         |         |      |

|           |         |         |         |         |          |          |         |           |         |         |         |         |      |
|-----------|---------|---------|---------|---------|----------|----------|---------|-----------|---------|---------|---------|---------|------|
| Adgrg7    | 25.986  | 4.70399 | 0.78073 | 6.02508 | 1.69E-09 | 3.56E-08 | 1.935   | 3.83303   | 0       | 42.5053 | 43.297  | 64.3457 | Up   |
| Tmem45a   | 800.785 | -0.6257 | 0.18448 | -3.3918 | 0.00069  | 0.0041   | 787.546 | 1107.75   | 1019.81 | 664.535 | 702.257 | 522.808 | Down |
| Cmss1     | 699.341 | -0.8393 | 0.15054 | -5.5752 | 2.47E-08 | 4.13E-07 | 797.221 | 1047.38   | 846.981 | 521.468 | 497.388 | 485.609 | Down |
| Col8a1    | 554.415 | -0.9167 | 0.14772 | -6.2058 | 5.44E-10 | 1.25E-08 | 778.839 | 705.278   | 690.38  | 435.421 | 371.721 | 344.852 | Down |
| Cpox      | 1380.31 | 0.45074 | 0.15613 | 2.88695 | 0.00389  | 0.01755  | 1374.82 | 1092.41   | 1032.23 | 1603.8  | 1416.13 | 1762.47 | Up   |
| Gpr15     | 40.2589 | 2.44708 | 0.4193  | 5.83606 | 5.34E-09 | 1.03E-07 | 11.61   | 11.4991   | 14.3232 | 54.9459 | 70.7537 | 78.4213 | Up   |
| Riox2     | 836.381 | 0.54202 | 0.12983 | 4.1749  | 2.98E-05 | 0.00026  | 592.111 | 717.736   | 733.35  | 991.1   | 992.664 | 991.325 | Up   |
| Gm9816    | 842.337 | 0.26153 | 0.12661 | 2.06556 | 0.03887  | 0.112    | 828.181 | 752.233   | 718.072 | 907.126 | 995.832 | 852.58  | Up   |
| Pros1     | 6836.53 | 0.2214  | 0.11094 | 1.99556 | 0.04598  | 0.12776  | 6894.42 | 5836.75   | 6207.69 | 7112.91 | 7990.94 | 6976.48 | Up   |
| Gm18870   | 146.569 | -1.0218 | 0.28651 | -3.5665 | 0.00036  | 0.00234  | 158.67  | 197.401   | 232.991 | 101.598 | 120.387 | 68.3673 | Down |
| Cggbp1    | 8509.21 | 0.21208 | 0.09011 | 2.35367 | 0.01859  | 0.06309  | 7588.11 | 7818.43   | 8248.28 | 8827.64 | 8850.55 | 9722.23 | Up   |
| Chmp2b    | 5966.68 | 0.28435 | 0.09622 | 2.95516 | 0.00313  | 0.01459  | 5083.25 | 5611.56   | 5446.65 | 6596.62 | 6938.09 | 6123.9  | Up   |
| Vgll3     | 1715.91 | -0.9266 | 0.13931 | -6.6512 | 2.91E-11 | 8.47E-10 | 1994.02 | 2290.24   | 2461.69 | 1180.82 | 1320.03 | 1048.63 | Down |
| Cadm2     | 148.078 | -1.9359 | 0.2766  | -6.9988 | 2.58E-12 | 8.67E-11 | 208.013 | 272.145   | 224.397 | 51.8358 | 49.6332 | 82.4429 | Down |
| Gbe1      | 2234.91 | -0.2747 | 0.11486 | -2.3917 | 0.01677  | 0.05811  | 2420.69 | 2721.45   | 2199.1  | 1992.57 | 2008.56 | 2067.1  | Down |
| Robo1     | 859.847 | -0.5873 | 0.13674 | -4.2951 | 1.75E-05 | 0.00016  | 974.274 | 1009.05   | 1114.35 | 723.628 | 599.822 | 737.964 | Down |
| Robo2     | 1353.78 | -0.257  | 0.11633 | -2.2091 | 0.02717  | 0.08505  | 1343.86 | 1572.5    | 1505.85 | 1184.97 | 1195.42 | 1320.09 | Down |
| Hspa13    | 2921.83 | 0.35013 | 0.10533 | 3.32403 | 0.00089  | 0.00504  | 2513.57 | 2399.48   | 2793.99 | 3430.49 | 3105.77 | 3287.66 | Up   |
| Samsn1    | 743.211 | 0.78279 | 0.23538 | 3.32568 | 0.00088  | 0.00501  | 696.601 | 564.414   | 378.134 | 901.943 | 1108.83 | 809.348 | Up   |
| Nrip1     | 1719.72 | 0.34247 | 0.11096 | 3.08656 | 0.00202  | 0.01008  | 1420.29 | 1674.08   | 1455.24 | 1859.87 | 1989.55 | 1919.31 | Up   |
| Mir99ahg  | 555.423 | -0.716  | 0.13771 | -5.1991 | 2.00E-07 | 2.84E-06 | 624.038 | 759.899   | 687.516 | 403.282 | 423.466 | 434.333 | Down |
| E330011C  | 87.2881 | 0.82052 | 0.38531 | 2.1295  | 0.03321  | 0.09906  | 88.0426 | 40.2469   | 61.1125 | 131.663 | 74.9778 | 127.686 | Up   |
| Cxadr     | 250.49  | 0.66207 | 0.19737 | 3.35441 | 0.0008   | 0.00459  | 214.785 | 189.735   | 177.608 | 268.509 | 289.351 | 362.95  | Up   |
| Btg3      | 3521.82 | 0.29822 | 0.14067 | 2.12006 | 0.034    | 0.10094  | 3611.68 | 2703.25   | 3162.57 | 3718.7  | 3650.68 | 4284.01 | Up   |
| Chodl     | 29.3123 | 2.2997  | 0.90523 | 2.54047 | 0.01107  | 0.04156  | 0       | 22.9982   | 6.68418 | 36.2851 | 48.5772 | 61.3295 | Up   |
| Ncam2     | 47.9546 | -1.7472 | 0.6392  | -2.7335 | 0.00627  | 0.02609  | 146.093 | 50.7877   | 24.827  | 26.9546 | 17.9524 | 21.1134 | Down |
| Mrip39    | 2460.26 | -0.6307 | 0.13217 | -2.51   | 0.01207  | 0.04457  | 2566.78 | 3094.22   | 2564.82 | 2309.8  | 1934.64 | 2291.31 | Down |
| Jam2      | 4897.53 | -0.2981 | 0.13071 | -2.2806 | 0.02257  | 0.07333  | 5384.15 | 5970.91   | 4849.85 | 4431.96 | 4851.38 | 3896.93 | Down |
| Atp5j     | 5253.17 | -0.4021 | 0.10454 | -3.8464 | 0.00012  | 0.00089  | 5493.47 | 6509.45   | 5938.42 | 4725.35 | 4546.19 | 4306.13 | Down |
| App       | 60023.1 | 0.3409  | 0.09831 | 3.46744 | 0.00053  | 0.00323  | 57892.4 | 49330.2   | 51670.6 | 65838.7 | 70072.6 | 65334   | Down |
| Adamts5   | 1005.17 | -1.313  | 0.21725 | -6.0438 | 1.50E-09 | 3.22E-08 | 1148.42 | 1871.48   | 1280.5  | 580.561 | 479.436 | 670.602 | Down |
| Rwdd2b    | 360.056 | 0.61382 | 0.155   | 3.96015 | 7.49E-05 | 0.00059  | 300.893 | 288.436   | 264.503 | 481.036 | 399.178 | 426.29  | Up   |
| Map3k7cl  | 128.335 | -0.9886 | 0.33996 | -2.9079 | 0.00364  | 0.01658  | 101.588 | 207.942   | 202.435 | 67.3865 | 97.1543 | 93.5023 | Down |
| Bach1     | 4035.26 | 0.21604 | 0.10636 | 2.0313  | 0.04222  | 0.11956  | 4120.59 | 3556.1    | 3524.47 | 4118.87 | 4642.76 | 4428.79 | Up   |
| Gm49688   | 20.7675 | 4.1343  | 0.98984 | 4.17672 | 2.96E-05 | 0.00026  | 1.935   | 1.91652   | 2.86465 | 30.0648 | 7.39218 | 80.4321 | Up   |
| Tiam1     | 2147.55 | -0.3189 | 0.14599 | -2.1845 | 0.02892  | 0.08943  | 2384.89 | 2584.42   | 2182.86 | 1801.81 | 1682.25 | 2249.08 | Down |
| Sod1      | 11376.8 | -0.48   | 0.10226 | -4.694  | 2.68E-06 | 3.01E-05 | 14195.2 | 12466     | 13095.3 | 10286.3 | 9130.4  | 9087.82 | Down |
| Gm49708   | 495.621 | -2.1785 | 0.7824  | -2.7844 | 0.00536  | 0.02297  | 764.326 | 1431.64   | 239.676 | 240.518 | 209.093 | 88.4753 | Down |
| Gm36169   | 37.6644 | -1.5043 | 0.38222 | -3.9356 | 8.30E-05 | 0.00064  | 54.1801 | 57.4955   | 55.3832 | 21.771  | 20.0645 | 17.0918 | Down |
| Mrap      | 152.706 | -3.2216 | 0.58028 | -5.5518 | 2.83E-08 | 4.68E-07 | 108.36  | 583.58    | 135.593 | 23.8445 | 31.6808 | 33.1782 | Down |
| Urb1      | 825.403 | -0.3441 | 0.16493 | -2.0864 | 0.03695  | 0.10778  | 876.556 | 889.264   | 1004.54 | 723.628 | 599.822 | 858.612 | Down |
| Eva1c     | 1602.55 | -0.5423 | 0.16567 | -3.2733 | 0.00106  | 0.00586  | 1598.31 | 2001.8    | 2100.74 | 1458.66 | 1082.43 | 1373.38 | Down |
| 4932438H  | 25.8228 | 1.07105 | 0.5303  | 2.01972 | 0.04341  | 0.12222  | 20.3175 | 21.0817   | 8.59395 | 37.3218 | 26.4006 | 41.2214 | Up   |
| Gm15966   | 5.25746 | 3.31415 | 1.31238 | 2.52531 | 0.01156  | 0.04306  | 1.935   | 0         | 0.95488 | 8.29373 | 5.28013 | 15.081  | Up   |
| Ifnar2    | 1750.95 | 0.53016 | 0.09604 | 5.52007 | 3.39E-08 | 5.54E-07 | 1472.54 | 1486.26   | 1339.7  | 2097.28 | 2031.79 | 2078.16 | Up   |
| Il10rb    | 4918.27 | 0.45535 | 0.09353 | 4.86829 | 1.13E-06 | 1.37E-05 | 4423.42 | 4065.89   | 3956.08 | 5861.59 | 5797.58 | 5405.04 | Up   |
| Ifnar1    | 3685.02 | 0.31477 | 0.11591 | 2.71553 | 0.00662  | 0.02721  | 3266.28 | 2952.39   | 3635.24 | 3942.63 | 3962.21 | 4351.37 | Up   |
| Ifngr2    | 4619.14 | 0.76122 | 0.09247 | 8.23167 | 1.85E-16 | 1.13E-14 | 3441.4  | 3493.81   | 3348.77 | 5507.03 | 6245.33 | 5678.5  | Up   |
| Tmem50b   | 12518.4 | 0.33859 | 0.10804 | 3.13409 | 0.00172  | 0.00879  | 12312.4 | 10116.3   | 10739.6 | 14615.6 | 13748.4 | 13577.9 | Up   |
| Gart      | 1607.6  | 0.21056 | 0.09721 | 2.16593 | 0.03032  | 0.09245  | 1582.83 | 1414.39   | 1474.34 | 1696.07 | 1725.55 | 1752.41 | Up   |
| Kcne2     | 1665.34 | 0.60998 | 0.1832  | 3.32949 | 0.00087  | 0.00495  | 1423.19 | 1061.75   | 1470.52 | 1964.58 | 1680.14 | 2391.85 | Up   |
| Smim11    | 596.091 | -0.3738 | 0.13703 | -2.7275 | 0.00638  | 0.0265   | 618.233 | 653.532   | 746.718 | 516.284 | 549.133 | 492.646 | Down |
| Rxn1      | 4273.93 | 0.38032 | 0.09581 | 3.96932 | 7.21E-05 | 0.00057  | 3637.81 | 3907.78   | 3596.09 | 4880.86 | 4516.62 | 5104.42 | Up   |
| 1700029J  | 71.9923 | 1.05894 | 0.4181  | 2.53272 | 0.01132  | 0.04231  | 29.9925 | 70.9111   | 39.1502 | 126.479 | 95.0423 | 70.3781 | Up   |
| Cbr1      | 3384.52 | -0.4202 | 0.19683 | -2.135  | 0.03276  | 0.09799  | 4850.08 | 3777.46   | 2994.51 | 3384.88 | 2468.99 | 2831.21 | Down |
| Gm5678    | 10.9757 | -4.9341 | 1.59927 | -3.0852 | 0.00203  | 0.01011  | 54.1801 | 3.83303   | 5.7293  | 0       | 2.11205 | 0       | Down |
| Cbr3      | 1433.96 | -0.759  | 0.32412 | -2.3417 | 0.0192   | 0.06465  | 3002.16 | 1254.36   | 1151.59 | 1209.85 | 946.199 | 1039.58 | Down |
| Dop1b     | 3002.68 | 0.33415 | 0.11129 | 3.00238 | 0.00268  | 0.01277  | 2925.72 | 2516.39   | 2527.58 | 3207.6  | 3251.5  | 3587.27 | Up   |
| Chaf1b    | 338.477 | 1.22494 | 0.2478  | 4.94328 | 7.68E-07 | 9.76E-06 | 276.705 | 146.614   | 185.247 | 424.017 | 501.612 | 496.668 | Up   |
| 24100031I | 22.8334 | 2.45684 | 0.69879 | 3.51584 | 0.00044  | 0.00277  | 4.83751 | 13.4156   | 2.86465 | 38.3585 | 23.326  | 54.2916 | Up   |
| Gm49619   | 10.8712 | 2.37385 | 0.89006 | 2.66705 | 0.00765  | 0.03066  | 0.9675  | 7.66607   | 1.90977 | 22.8077 | 14.7844 | 17.0918 | Up   |
| Sim2      | 4.30744 | 4.59091 | 1.59636 | 2.87587 | 0.00403  | 0.01809  | 0       | 0.95826   | 0       | 8.29373 | 10.5603 | 6.03241 | Up   |
| Hlcs      | 1208.06 | 0.33761 | 0.11205 | 3.01303 | 0.00259  | 0.0124   | 1123.27 | 1102      | 976.845 | 1280.34 | 1385.51 | 1380.42 | Up   |
| Ripply3   | 3804.76 | -0.7681 | 0.16563 | -4.6371 | 3.53E-06 | 3.88E-05 | 4248.3  | 4632.22   | 5502.04 | 2802.24 | 3323.31 | 2320.47 | Down |
| Pigp      | 2476.99 | -0.2456 | 0.12486 | -1.9668 | 0.04921  | 0.135    | 2452.62 | 3033.85   | 2575.32 | 2439.39 | 2230.33 | 2130.44 | Down |
| Gm31641   | 1080.77 | 0.53404 | 0.14372 | 3.71573 | 0.0002   | 0.00141  | 823.344 | 799.188   | 1026.5  | 1239.91 | 1211.26 | 1384.44 | Up   |
| Get1      | 1136.31 | -0.2761 | 0.11878 | -2.3242 | 0.02011  | 0.06708  | 1235.5  | 1328.15   | 1170.69 | 1019.09 | 951.479 | 1112.98 | Down |
| Sh3bgr    | 286.527 | -2.1758 | 0.3612  | -6.0238 | 1.70E-09 | 3.58E-08 | 312.503 | 780.981   | 314.156 | 103.672 | 99.2664 | 108.583 | Down |
| Bace2     | 1639.87 | 0.44359 | 0.20099 | 2.20708 | 0.02731  | 0.08538  | 1595.41 | 1473.8    | 1100.03 | 2363.71 | 1584.04 | 1722.25 | Up   |
| Mx1       | 328.239 | 1.38852 | 0.14847 | 9.35245 | 8.56E-21 | 7.96E-19 | 173.183 | 184.944   | 186.202 | 497.624 | 450.923 | 476.56  | Up   |
| Tmprss2   | 8232.35 | 0.52047 | 0.1554  | 3.34915 | 0.00081  | 0.00467  | 7519.42 | 5618.27   | 7152.07 | 9775.19 | 10975.3 | 8353.88 | Up   |
| Ripk4     | 2447.27 | 0.82574 | 0.14318 | 5.76725 | 8.06E-09 | 1.49E-07 | 1973.7  | 1490.09   | 1832.42 | 3035.5  | 3456.37 | 2895.55 | Up   |
| Scaf8     | 1979.89 | 0.2689  | 0.12034 | 2.23456 | 0.02545  | 0.08079  | 1936.94 | 1639.58   | 1811.41 | 2026.78 | 2089.87 | 2374.76 | Up   |
| Tiam2     | 345.259 | -0.4002 | 0.16013 | -2.4991 | 0.01245  | 0.04571  | 346.366 | 417.801   | 414.419 | 287.17  | 284.071 | 321.728 | Down |
| Snx9      | 4393.21 | 0.22135 | 0.09132 | 2.42387 | 0.01536  | 0.05408  | 4270.55 | 3845.49   | 4054.43 | 4634.12 | 4956.98 | 4597.7  | Up   |
| Tmem181   | 975.472 | 0.47402 | 0.11366 | 4.17051 | 3.04E-05 | 0.00026  | 865.914 | 822.186   | 761.997 | 1111.36 | 1091.93 | 1199.44 | Up   |
| Dynt11a   | 161.754 | 0.52789 | 0.24575 | 2.14807 | 0.03171  | 0.09563  | 121.905 | 168.654</ |         |         |         |         |      |

|           |         |         |         |         |          |          |         |         |         |         |         |         |      |
|-----------|---------|---------|---------|---------|----------|----------|---------|---------|---------|---------|---------|---------|------|
| Mpc1      | 886.309 | 0.27013 | 0.1306  | 2.06835 | 0.03861  | 0.11143  | 833.986 | 873.932 | 702.794 | 1003.54 | 972.599 | 931.001 | Up   |
| T2        | 964.136 | -0.6707 | 0.24824 | -2.7017 | 0.0069   | 0.0282   | 1007.17 | 1381.81 | 1164    | 938.228 | 475.211 | 818.396 | Down |
| 170001011 | 200.993 | 0.66568 | 0.25343 | 2.62665 | 0.00862  | 0.03381  | 123.84  | 188.777 | 153.736 | 238.445 | 198.533 | 302.626 | Up   |
| Gm7947    | 3.24762 | 5.20158 | 1.87895 | 2.76834 | 0.00563  | 0.02395  | 0       | 0       | 0       | 9.33044 | 2.11205 | 8.04321 | Up   |
| Slc22a1   | 99.0321 | -1.5315 | 0.35633 | -4.2979 | 1.72E-05 | 0.00016  | 113.198 | 215.608 | 112.676 | 59.0928 | 44.3531 | 49.2646 | Down |
| Igf2r     | 4732.23 | 0.40697 | 0.09363 | 4.3464  | 1.38E-05 | 0.00013  | 4359.56 | 4033.31 | 3814.76 | 5239.56 | 5398.4  | 5547.8  | Up   |
| Airn      | 1426.97 | -0.3203 | 0.13143 | -2.437  | 0.01481  | 0.05253  | 1588.64 | 1403.85 | 1761.76 | 1171.49 | 1277.79 | 1358.3  | Down |
| Mrgprh    | 5.75921 | -5.9224 | 1.81675 | -3.2599 | 0.00111  | 0.00612  | 6.77251 | 25.873  | 1.90977 | 0       | 0       | 0       | Down |
| Acat2     | 2733.98 | 1.25162 | 0.14368 | 8.71106 | 3.01E-18 | 2.29E-16 | 1611.86 | 1836.02 | 1403.68 | 3835.85 | 4279.01 | 3437.47 | Up   |
| Gpr31c    | 9.32057 | 2.64841 | 1.09602 | 2.41639 | 0.01568  | 0.05497  | 3.87001 | 3.83303 | 0       | 5.18358 | 16.8964 | 26.1404 | Up   |
| Gm19283   | 5.41753 | 2.90467 | 1.28173 | 2.2662  | 0.02344  | 0.07572  | 0       | 1.91652 | 1.90977 | 12.4406 | 3.16808 | 13.0702 | Up   |
| Dact2     | 289.368 | 1.0742  | 0.17866 | 6.01255 | 1.83E-09 | 3.81E-08 | 202.208 | 174.403 | 182.383 | 404.319 | 435.082 | 337.815 | Up   |
| Thbs2     | 136.787 | -0.8026 | 0.37999 | -2.1121 | 0.03468  | 0.10251  | 167.378 | 260.646 | 93.5785 | 92.2677 | 120.387 | 86.4645 | Down |
| Wdr27     | 608.261 | -0.8297 | 0.19112 | -4.3413 | 1.42E-05 | 0.00013  | 737.236 | 823.144 | 775.365 | 472.742 | 326.312 | 514.765 | Down |
| 1600012H  | 1495.74 | 0.30761 | 0.12783 | 2.4065  | 0.01611  | 0.05621  | 1455.12 | 1165.24 | 1390.31 | 1762.42 | 1575.59 | 1625.73 | Up   |
| Ermard    | 1140.34 | -0.2528 | 0.10254 | -2.4653 | 0.01369  | 0.04939  | 1236.47 | 1304.19 | 1179.28 | 1010.8  | 1068.7  | 1042.6  | Down |
| Gm35455   | 29.8126 | -1.1028 | 0.4643  | -2.3751 | 0.01754  | 0.06014  | 49.3426 | 35.4556 | 37.2404 | 12.4406 | 24.2886 | 20.108  | Down |
| Gm5091    | 6.7316  | -6.1473 | 1.5462  | -3.9757 | 7.02E-05 | 0.00056  | 17.415  | 16.2904 | 6.68418 | 0       | 0       | 0       | Down |
| Gm35576   | 8.80757 | -4.6348 | 1.46899 | -3.1551 | 0.0016   | 0.00829  | 7.74001 | 35.4556 | 7.63906 | 0       | 0       | 2.0108  | Down |
| Dil1      | 2699.26 | -0.4491 | 0.14384 | -3.1222 | 0.0018   | 0.00911  | 3400.77 | 2520.22 | 3427.07 | 2303.58 | 2254.61 | 2289.3  | Down |
| Spaca6    | 1520.39 | 0.30717 | 0.13014 | 2.36032 | 0.01826  | 0.06216  | 1260.65 | 1274.48 | 1542.14 | 1642.16 | 1817.42 | 1585.52 | Up   |
| Fpr1      | 861.405 | 2.29901 | 0.65992 | 3.48376 | 0.00049  | 0.00307  | 538.898 | 210.817 | 123.18  | 1020.13 | 1673.8  | 1601.6  | Up   |
| Fpr3      | 13.392  | 1.66545 | 0.76976 | 2.16358 | 0.0305   | 0.0929   | 11.61   | 5.74955 | 1.90977 | 24.8812 | 21.1205 | 15.081  | Up   |
| Zfp53     | 997.011 | 0.31815 | 0.12354 | 2.57539 | 0.01001  | 0.03825  | 807.864 | 878.723 | 975.89  | 1171.49 | 1081.37 | 1066.73 | Up   |
| Gm50433   | 32.2734 | -0.9547 | 0.46611 | -2.0482 | 0.04055  | 0.11573  | 50.3101 | 33.5391 | 43.9246 | 13.4773 | 23.2326 | 29.1566 | Down |
| Gm10509   | 73.028  | 0.9     | 0.35069 | 2.56638 | 0.01028  | 0.03909  | 67.7251 | 52.7042 | 32.466  | 85.0107 | 108.771 | 91.4915 | Up   |
| Zfp820    | 317.262 | 0.62057 | 0.16872 | 3.67805 | 0.00024  | 0.0016   | 284.445 | 224.233 | 241.585 | 355.594 | 386.505 | 411.209 | Up   |
| Zfp995    | 424.553 | 0.3336  | 0.16273 | 2.04996 | 0.04037  | 0.11536  | 373.456 | 375.637 | 378.134 | 433.347 | 428.746 | 557.997 | Up   |
| Gm7072    | 906.461 | 0.39037 | 0.13337 | 2.92696 | 0.00342  | 0.01577  | 782.709 | 849.975 | 720.937 | 943.411 | 1137.34 | 1004.4  | Up   |
| Zfp946    | 1493.81 | 0.58913 | 0.10951 | 5.37984 | 7.46E-08 | 1.13E-06 | 1121.33 | 1254.36 | 1203.15 | 1669.11 | 1907.18 | 1807.71 | Up   |
| Mmp25     | 121.842 | 0.72395 | 0.25783 | 2.80785 | 0.00499  | 0.02167  | 106.425 | 94.8676 | 74.4809 | 132.7   | 143.619 | 178.961 | Up   |
| Bicdl2    | 512.13  | 0.42797 | 0.16351 | 2.61736 | 0.00886  | 0.03454  | 389.903 | 444.632 | 475.532 | 675.939 | 564.974 | 521.803 | Up   |
| Cldn6     | 6.58115 | -4.1923 | 1.37586 | -3.0471 | 0.00231  | 0.01124  | 15.48   | 9.58259 | 12.4135 | 0       | 0       | 2.0108  | Down |
| 9530082P  | 475.791 | 0.54361 | 0.26752 | 2.03203 | 0.04215  | 0.11944  | 546.638 | 269.271 | 345.668 | 574.341 | 646.288 | 472.538 | Up   |
| Srrm2     | 23961.2 | 0.25699 | 0.09488 | 2.70865 | 0.00676  | 0.0277   | 21868.4 | 20029.5 | 23599.9 | 25779   | 25986.7 | 26503.4 | Up   |
| Prss32    | 5.30151 | 4.9021  | 1.54562 | 3.17161 | 0.00152  | 0.0079   | 0.9675  | 0       | 0       | 12.4406 | 6.33615 | 12.0648 | Up   |
| Sbp       | 4.10754 | 5.54036 | 1.71283 | 3.23462 | 0.00122  | 0.00658  | 0       | 0       | 0       | 10.3672 | 4.2241  | 10.054  | Up   |
| Prss30    | 441.173 | 4.15829 | 0.72618 | 5.72626 | 1.03E-08 | 1.85E-07 | 62.8876 | 45.9964 | 31.5111 | 1663.93 | 402.346 | 440.366 | Up   |
| Prss22    | 129.121 | 3.74067 | 0.60801 | 6.15226 | 7.64E-10 | 1.71E-08 | 30.96   | 21.0817 | 1.90977 | 352.483 | 195.365 | 172.929 | Up   |
| Amhdh2    | 1468.47 | 0.99099 | 0.10512 | 9.42692 | 4.22E-21 | 4.00E-19 | 1012.97 | 986.048 | 950.108 | 1838.1  | 2096.21 | 1927.35 | Up   |
| Atp6v0c   | 7175.92 | 0.66606 | 0.11987 | 5.55653 | 2.75E-08 | 4.57E-07 | 5012.63 | 6160.64 | 5471.48 | 8041.8  | 8961.43 | 9407.54 | Up   |
| Ccnf      | 161.396 | 1.12592 | 0.22167 | 5.07927 | 3.79E-07 | 5.12E-06 | 99.6527 | 105.408 | 99.3078 | 223.931 | 182.692 | 257.383 | Up   |
| Abca3     | 11884.6 | 1.78756 | 0.18248 | 9.79595 | 1.17E-22 | 1.30E-20 | 7010.52 | 4310.25 | 4695.16 | 18100   | 18636.7 | 18554.7 | Up   |
| D330041f  | 205.555 | 0.76057 | 0.2111  | 3.60281 | 0.00031  | 0.00207  | 122.873 | 183.986 | 150.871 | 269.546 | 258.726 | 247.329 | Up   |
| Dnase1l2  | 316.026 | -0.5293 | 0.22891 | -2.3125 | 0.02075  | 0.06861  | 362.813 | 344.015 | 413.464 | 245.702 | 195.365 | 334.798 | Down |
| Pgp       | 2319.95 | 0.31359 | 0.10649 | 2.94467 | 0.00323  | 0.01501  | 2180.75 | 2089.96 | 1935.55 | 2650.88 | 2691.81 | 2370.74 | Up   |
| Nthl1     | 494.512 | -0.4882 | 0.15336 | -3.1837 | 0.00145  | 0.00764  | 492.458 | 607.536 | 632.132 | 430.237 | 406.57  | 398.139 | Down |
| Slc9a3r2  | 21206   | -0.3054 | 0.14304 | -2.135  | 0.03276  | 0.09799  | 25656.2 | 19724.8 | 24945.4 | 19665.5 | 20640   | 16604.2 | Down |
| Gfer      | 950.772 | 0.49719 | 0.15695 | 3.16782 | 0.00154  | 0.00798  | 696.601 | 818.353 | 850.801 | 1125.87 | 946.199 | 1266.81 | Up   |
| Noxo1     | 195.185 | 0.95126 | 0.24918 | 3.81756 | 0.00013  | 0.00099  | 122.873 | 134.156 | 142.278 | 234.298 | 201.701 | 335.804 | Up   |
| Tb13      | 1700.67 | 0.33143 | 0.09862 | 3.36056 | 0.00078  | 0.00452  | 1401.91 | 1564.84 | 1551.68 | 1946.95 | 1877.61 | 1861    | Up   |
| Ndufb10   | 3868.87 | -0.6202 | 0.14837 | -4.1798 | 2.92E-05 | 0.00026  | 3792.61 | 5456.32 | 4814.52 | 3158.87 | 3013.9  | 2976.99 | Down |
| Rpl3l     | 65.7203 | -1.3332 | 0.50083 | -2.6621 | 0.00777  | 0.03105  | 72.5626 | 153.321 | 56.3381 | 25.9179 | 57.0254 | 29.1566 | Down |
| Msr1b     | 2447.41 | 0.97308 | 0.21254 | 4.5784  | 4.69E-06 | 4.98E-05 | 2026.92 | 1715.28 | 1213.66 | 3094.6  | 3929.47 | 2704.53 | Up   |
| Hs3st6    | 242.894 | -1.2641 | 0.30375 | -4.1617 | 3.16E-05 | 0.00027  | 238.005 | 400.552 | 390.547 | 144.104 | 97.1543 | 187.005 | Down |
| Hagh      | 2155.23 | 0.24746 | 0.09443 | 2.62046 | 0.00878  | 0.03431  | 1956.29 | 1972.1  | 1984.25 | 2477.75 | 2194.42 | 2346.61 | Up   |
| Igfals    | 143.871 | 1.13845 | 0.28769 | 3.95726 | 7.58E-05 | 0.0006   | 72.5626 | 116.908 | 80.2102 | 173.132 | 171.076 | 249.339 | Up   |
| Nubp2     | 1381.77 | 0.26    | 0.12066 | 2.1549  | 0.03117  | 0.09436  | 1356.44 | 1187.28 | 1228.93 | 1454.51 | 1656.9  | 1406.56 | Up   |
| Mapk8ip3  | 5099.65 | -0.3043 | 0.0898  | -3.3882 | 0.0007   | 0.00415  | 5418.98 | 5429.49 | 6057.78 | 4598.87 | 4528.24 | 4564.52 | Down |
| Jpt2      | 2152.38 | 0.80315 | 0.1225  | 6.55632 | 5.52E-11 | 1.53E-09 | 1427.06 | 1535.13 | 1742.66 | 2815.72 | 2511.23 | 2882.48 | Up   |
| Clcn7     | 3393.89 | 0.36766 | 0.08011 | 4.58948 | 4.44E-06 | 4.75E-05 | 3045.69 | 2918.86 | 2926.72 | 3754.98 | 3914.69 | 3802.43 | Up   |
| Ccdc154   | 521.151 | -0.6691 | 0.1975  | -3.3879 | 0.0007   | 0.00415  | 648.226 | 671.739 | 599.666 | 518.358 | 340.04  | 348.874 | Down |
| BC003965  | 1205.96 | -0.364  | 0.13997 | -2.6007 | 0.0093   | 0.03601  | 1162.94 | 1473.8  | 1435.19 | 969.329 | 1063.42 | 1131.08 | Down |
| Gnptg     | 3077.39 | 0.26138 | 0.09035 | 2.89299 | 0.00382  | 0.01727  | 2705.13 | 2923.65 | 2769.16 | 3437.75 | 3440.53 | 3188.13 | Up   |
| Baiap3    | 558.451 | -0.7553 | 0.20485 | -3.6874 | 0.00023  | 0.00155  | 774.969 | 619.035 | 710.433 | 416.76  | 315.752 | 513.76  | Down |
| Ube2i     | 9161.75 | 0.45407 | 0.0924  | 4.91421 | 8.91E-07 | 1.11E-05 | 8293.42 | 7381.47 | 7520.66 | 10510.2 | 10203.3 | 11061.4 | Up   |
| Tpsb2     | 20.5217 | -4.2341 | 1.40213 | -3.0197 | 0.00253  | 0.01217  | 4.83751 | 99.6589 | 12.4135 | 6.2203  | 0       | 0       | Down |
| Cacna1h   | 334.858 | -1.1586 | 0.392   | -2.9555 | 0.00312  | 0.01457  | 264.128 | 709.111 | 414.419 | 255.032 | 115.107 | 251.35  | Down |
| Tekt4     | 1667.26 | -0.6369 | 0.18068 | -3.5252 | 0.00042  | 0.00268  | 1895.34 | 2214.54 | 1978.52 | 1619.35 | 1016.95 | 1278.87 | Down |
| Ccdc78    | 2726.76 | -0.4894 | 0.23443 | -2.0876 | 0.03683  | 0.10753  | 2615.16 | 3652.88 | 3286.71 | 2725.53 | 1475.27 | 2604.99 | Down |
| Mettrn    | 233.896 | -0.3925 | 0.19492 | -2.0138 | 0.04403  | 0.12351  | 222.525 | 312.392 | 261.638 | 201.123 | 199.589 | 206.107 | Down |
| Jmjd8     | 883.188 | 0.3491  | 0.15401 | 2.26672 | 0.02341  | 0.07565  | 893.971 | 723.485 | 713.298 | 966.219 | 889.173 | 1112.98 | Up   |
| Wdr90     | 1379.89 | -0.4895 | 0.16316 | -3.0003 | 0.0027   | 0.01283  | 1485.11 | 1556.21 | 1794.22 | 1245.1  | 920.854 | 1277.86 | Down |
| Mcrip2    | 446.683 | -0.8251 | 0.2477  | -3.3309 | 0.00087  | 0.00493  | 446.018 | 804.937 | 462.163 | 325.529 | 314.696 | 326.755 | Down |
| Pigq      | 509.444 | 0.92859 | 0.16319 | 5.69015 | 1.27E-08 | 2.25E-07 | 389.903 | 316.225 | 346.622 | 594.038 | 761.394 | 648.484 | Up   |
| Capn15    | 274.254 | 0.98527 | 0.17973 | 5.48208 | 4.20E-08 | 6.75E-07 | 204.143 | 155.238 | 192.886 | 337.969 | 382.281 | 373.004 | Up   |
| Rab11fip3 | 930.6   | 0.37419 | 0.17411 | 2.1491  | 0.03163  | 0.09546  | 902.679 | 671.739 | 857.485 | 911.273 | 1014.84 | 1225.58 | Up   |
| Tmem8     | 2599.8  |         |         |         |          |          |         |         |         |         |         |         |      |

|           |         |         |         |         |          |          |         |         |         |         |         |         |      |
|-----------|---------|---------|---------|---------|----------|----------|---------|---------|---------|---------|---------|---------|------|
| Neurl1b   | 1144.27 | -0.8004 | 0.15613 | -5.1264 | 2.95E-07 | 4.08E-06 | 1254.85 | 1414.39 | 1692.05 | 739.178 | 894.453 | 870.677 | Down |
| Gm50269   | 69.0697 | -0.8425 | 0.35901 | -2.3468 | 0.01894  | 0.06399  | 82.2376 | 100.617 | 83.0748 | 53.9092 | 64.4175 | 30.162  | Down |
| Gm34455   | 32.2214 | -2.1775 | 0.66511 | -3.2739 | 0.00106  | 0.00585  | 45.4726 | 58.4538 | 54.4283 | 22.8077 | 2.11205 | 10.054  | Down |
| Atp6v0e   | 6332.17 | 0.49064 | 0.1105  | 4.44011 | 8.99E-06 | 8.93E-05 | 5150.98 | 5383.5  | 5262.36 | 7353.43 | 8222.21 | 6620.56 | Up   |
| Crebrf    | 5729.41 | -0.2037 | 0.09741 | -2.0913 | 0.03651  | 0.10677  | 6405.83 | 5924.91 | 6069.24 | 4986.6  | 5240    | 5749.89 | Down |
| Nkx2-5    | 53.4122 | -6.2727 | 1.02746 | -6.1051 | 1.03E-09 | 2.27E-08 | 44.5051 | 215.608 | 56.3381 | 0       | 0       | 4.0216  | Down |
| Cuta      | 2517.11 | 0.26905 | 0.09444 | 2.84893 | 0.00439  | 0.01941  | 2215.58 | 2268.2  | 2365.24 | 2857.19 | 2819.59 | 2576.84 | Up   |
| Syngap1   | 1645.01 | -0.4979 | 0.1981  | -2.5134 | 0.01196  | 0.04418  | 1820.84 | 1807.28 | 2150.4  | 1398.53 | 996.888 | 1696.11 | Down |
| Itpr3     | 3770.71 | 0.32639 | 0.09691 | 3.36789 | 0.00076  | 0.00441  | 3438.5  | 3089.43 | 3510.15 | 4191.44 | 4040.35 | 4354.39 | Up   |
| Uqcc2     | 1036.83 | -0.2888 | 0.14647 | -1.9716 | 0.04866  | 0.13362  | 943.314 | 1197.82 | 1279.54 | 939.265 | 945.143 | 915.92  | Down |
| Ip6k3     | 292.08  | -1.2713 | 0.22434 | -5.6669 | 1.45E-08 | 2.55E-07 | 341.528 | 492.545 | 404.87  | 161.728 | 208.037 | 143.772 | Down |
| 9630028Ic | 1199.97 | -0.9256 | 0.22377 | -4.1363 | 3.53E-05 | 0.0003   | 1776.33 | 1711.45 | 1228.93 | 1075.07 | 638.895 | 769.132 | Down |
| Grm4      | 301.759 | -1.2592 | 0.2133  | -5.9034 | 3.56E-09 | 7.12E-08 | 343.463 | 495.42  | 438.291 | 166.911 | 157.348 | 209.123 | Down |
| Nudt3     | 3302.71 | -0.381  | 0.11399 | -3.3428 | 0.00083  | 0.00475  | 3449.14 | 4161.72 | 3598    | 2861.34 | 3024.46 | 2721.62 | Down |
| Spdef     | 258.522 | 1.14611 | 0.30563 | 3.75003 | 0.00018  | 0.00126  | 124.808 | 238.606 | 119.36  | 309.978 | 321.032 | 437.349 | Up   |
| Ilrun     | 9284.14 | 0.26127 | 0.09545 | 2.73716 | 0.0062   | 0.02586  | 9088.71 | 7912.34 | 8336.13 | 10081   | 10563.4 | 9723.23 | Up   |
| Tcp11     | 934.957 | -0.3691 | 0.18257 | -2.0214 | 0.04323  | 0.12176  | 1041.03 | 1102    | 1018.86 | 923.714 | 607.215 | 916.926 | Down |
| Scube3    | 170.634 | -1.2137 | 0.28245 | -4.2972 | 1.73E-05 | 0.00016  | 156.735 | 281.728 | 276.916 | 94.3411 | 103.49  | 110.594 | Down |
| Def6      | 538.054 | 0.4154  | 0.13928 | 2.98257 | 0.00286  | 0.01349  | 428.603 | 462.839 | 491.765 | 643.801 | 647.344 | 553.976 | Up   |
| Ppard     | 1263.34 | 0.27908 | 0.09772 | 2.85593 | 0.00429  | 0.01906  | 1191.96 | 1104.87 | 1127.72 | 1418.23 | 1396.07 | 1341.2  | Up   |
| Fkbp5     | 2102.52 | -0.6809 | 0.18618 | -3.6571 | 0.00026  | 0.00171  | 2432.3  | 3242.75 | 2094.06 | 1738.57 | 1379.17 | 1728.28 | Down |
| E230001N  | 24.5139 | -1.3077 | 0.51117 | -2.5583 | 0.01052  | 0.03986  | 42.5701 | 38.3303 | 23.8721 | 17.6242 | 11.6163 | 13.0702 | Down |
| Slc26a8   | 97.0604 | -1.0372 | 0.26693 | -3.8857 | 0.0001   | 0.00077  | 119.003 | 128.407 | 144.187 | 75.6803 | 51.7452 | 63.3403 | Down |
| Mapk13    | 2086.75 | 1.69713 | 0.10596 | 16.0173 | 9.68E-58 | 1.39E-54 | 1021.68 | 1027.25 | 902.364 | 3120.51 | 3083.59 | 3365.08 | Up   |
| Bnip5     | 61.681  | 4.35054 | 0.58532 | 7.43272 | 1.06E-13 | 4.47E-12 | 7.74001 | 5.74955 | 3.81953 | 175.205 | 54.9133 | 122.659 | Up   |
| Pxt1      | 2.0828  | -4.4549 | 2.07354 | -2.1484 | 0.03168  | NA       | 4.83751 | 5.74955 | 1.90977 | 0       | 0       | 0       | Down |
| Stk38     | 8207.9  | 0.57837 | 0.08805 | 6.56871 | 5.08E-11 | 1.41E-09 | 6734.78 | 6542.99 | 6475.06 | 9599.99 | 10522.2 | 9372.35 | Up   |
| Srsf3     | 15125.1 | -0.2102 | 0.10558 | -1.9912 | 0.04646  | 0.12882  | 14662.5 | 16266.4 | 17746.5 | 13374.7 | 14492.9 | 14207.3 | Down |
| Trp53cor1 | 13.1649 | 1.9413  | 0.70302 | 2.76137 | 0.00576  | 0.02437  | 5.80501 | 6.70781 | 3.81953 | 23.8445 | 12.6723 | 26.1404 | Up   |
| Rab44     | 1168.26 | 1.18706 | 0.20708 | 5.73237 | 9.90E-09 | 1.79E-07 | 891.069 | 531.834 | 716.162 | 1587.21 | 1879.73 | 1403.54 | Up   |
| Pi16      | 1147.59 | -2.0644 | 0.28631 | -7.2105 | 5.58E-13 | 2.11E-11 | 1397.07 | 2820.16 | 1339.7  | 533.909 | 407.626 | 387.079 | Down |
| Mtch1     | 14011.8 | 0.20313 | 0.08182 | 2.48256 | 0.01304  | 0.04747  | 13515   | 12929.8 | 12636   | 15478.2 | 15209.9 | 14301.8 | Up   |
| Fgd2      | 1415.52 | 0.68918 | 0.14099 | 4.88809 | 1.02E-06 | 1.25E-05 | 1245.17 | 1050.25 | 955.838 | 1622.46 | 1718.15 | 1901.21 | Up   |
| Gm36486   | 57.7683 | 2.16018 | 0.43574 | 4.95754 | 7.14E-07 | 9.14E-06 | 19.35   | 17.2487 | 26.7367 | 68.4232 | 140.451 | 74.3997 | Up   |
| Pim1      | 2120.63 | 1.00656 | 0.16032 | 6.27835 | 3.42E-10 | 8.21E-09 | 1174.55 | 1620.42 | 1433.28 | 2781.51 | 3215.6  | 2498.42 | Up   |
| Mdga1     | 175.779 | 1.11451 | 0.29759 | 3.74511 | 0.00018  | 0.00128  | 97.7176 | 146.614 | 88.8041 | 224.967 | 312.584 | 183.988 | Up   |
| Btbd9     | 1318.21 | 0.23441 | 0.09003 | 2.60374 | 0.00922  | 0.03573  | 1193.9  | 1215.07 | 1225.11 | 1418.23 | 1418.24 | 1438.73 | Up   |
| Gm10503   | 102.008 | -0.7999 | 0.31393 | -2.5481 | 0.01083  | 0.04086  | 114.165 | 137.989 | 136.548 | 48.7256 | 98.2104 | 76.4105 | Down |
| Abcg1     | 4874.63 | 1.53941 | 0.26864 | 5.73046 | 1.00E-08 | 1.81E-07 | 3773.26 | 1814.94 | 1898.31 | 7038.26 | 8554.86 | 6168.13 | Up   |
| Rsp1      | 3003.93 | -0.5243 | 0.2344  | -2.2368 | 0.0253   | 0.08045  | 3015.7  | 4023.73 | 3592.27 | 2756.63 | 1579.81 | 3055.41 | Down |
| Slc37a1   | 3973.42 | 0.60506 | 0.11664 | 5.18719 | 2.13E-07 | 3.00E-06 | 3068.91 | 3325.16 | 3062.31 | 4823.84 | 5304.42 | 4255.86 | Up   |
| Pde9a     | 1614.96 | -0.8043 | 0.14366 | -5.5987 | 2.16E-08 | 3.65E-07 | 1779.24 | 2175.25 | 2206.73 | 1098.92 | 1333.76 | 1095.89 | Down |
| Gm50105   | 127.005 | 1.2596  | 0.2715  | 4.63937 | 3.49E-06 | 3.84E-05 | 54.1801 | 81.452  | 88.8041 | 201.123 | 181.636 | 154.832 | Up   |
| 4833413E  | 8.13001 | 2.02881 | 0.85408 | 2.37544 | 0.01753  | 0.06009  | 2.9025  | 4.79129 | 1.90977 | 10.3672 | 13.7283 | 15.081  | Up   |
| Gm30571   | 176.053 | -2.3328 | 0.43205 | -5.3994 | 6.69E-08 | 1.03E-06 | 199.305 | 399.594 | 282.645 | 50.7991 | 27.4567 | 96.5185 | Down |
| Hsf2bp    | 152.92  | 1.3236  | 0.36262 | 3.65014 | 0.00026  | 0.00176  | 66.7576 | 120.741 | 74.4809 | 218.747 | 135.171 | 301.62  | Up   |
| Rrp1b     | 1142.81 | -0.2434 | 0.11531 | -2.1108 | 0.03479  | 0.10277  | 1176.48 | 1198.78 | 1341.61 | 981.77  | 1103.55 | 1054.67 | Down |
| Ephx3     | 92.789  | -0.5867 | 0.29007 | -2.0227 | 0.0431   | 0.12153  | 108.36  | 113.075 | 112.676 | 58.0561 | 98.2104 | 66.3565 | Down |
| Akap8     | 7711.27 | -0.2948 | 0.0951  | -3.0996 | 0.00194  | 0.00971  | 8335.99 | 8026.37 | 9126.77 | 6726.21 | 707.18  | 7282.12 | Down |
| Cyp4f16   | 1702.4  | 0.60417 | 0.13174 | 4.58603 | 4.52E-06 | 4.82E-05 | 1409.65 | 1434.51 | 1208.88 | 1988.42 | 2296.86 | 1876.08 | Up   |
| Cyp4f37   | 5.63534 | 3.42214 | 1.23859 | 2.76293 | 0.00573  | 0.02428  | 1.935   | 0.95826 | 0       | 8.29373 | 10.5603 | 12.0648 | Up   |
| Cyp4f40   | 32.1807 | 1.63439 | 0.55662 | 2.93627 | 0.00332  | 0.01536  | 13.545  | 25.873  | 7.63906 | 55.9827 | 32.7368 | 57.3078 | Up   |
| Cyp4f15   | 1050.18 | -1.3491 | 0.34744 | -3.883  | 0.0001   | 0.00078  | 1116.5  | 1799.61 | 1608.98 | 689.416 | 267.174 | 819.402 | Down |
| Zfp763    | 600.433 | -0.419  | 0.12221 | -3.4283 | 0.00061  | 0.00365  | 645.323 | 686.113 | 729.531 | 531.835 | 511.116 | 498.679 | Down |
| Adams10   | 7119.81 | -0.3886 | 0.11278 | -3.4454 | 0.00057  | 0.00347  | 7666.48 | 7608.57 | 8943.43 | 5742.37 | 6616    | 6141.99 | Down |
| Myo1f     | 2341.08 | 1.09993 | 0.18606 | 5.91157 | 3.39E-09 | 6.80E-08 | 1759.89 | 1506.38 | 1202.2  | 2828.16 | 3871.39 | 2878.46 | Up   |
| Gm17251   | 137.556 | -0.8739 | 0.21396 | -4.0844 | 4.42E-05 | 0.00037  | 178.02  | 191.652 | 164.24  | 105.745 | 98.2104 | 87.4699 | Down |
| Angptl4   | 3656.7  | -1.2335 | 0.15847 | -7.7839 | 7.03E-15 | 3.48E-13 | 4243.46 | 5366.25 | 5783.73 | 2510.93 | 2079.31 | 1956.51 | Down |
| Kank3     | 2820.87 | -0.4371 | 0.15892 | -2.7502 | 0.00596  | 0.02502  | 3355.3  | 2640    | 3739.32 | 2218.57 | 2690.75 | 2281.25 | Down |
| Rps28     | 1516.93 | -0.4246 | 0.13628 | -3.1158 | 0.00183  | 0.00927  | 1785.04 | 1514.05 | 1916.45 | 1377.8  | 1336.93 | 1171.29 | Down |
| Kifc1     | 112.93  | 0.72331 | 0.33658 | 2.14899 | 0.03164  | 0.09546  | 101.588 | 96.7841 | 57.293  | 166.911 | 97.1543 | 157.848 | Up   |
| Tapbp     | 14614   | 0.35577 | 0.09871 | 3.60411 | 0.00031  | 0.00206  | 11764.8 | 13276.7 | 13421.8 | 15734.2 | 17402.2 | 16084.4 | Up   |
| Rps18     | 13048.5 | -0.3208 | 0.14306 | -2.2428 | 0.02491  | 0.07947  | 12169.2 | 14559.8 | 16751.5 | 11131.2 | 10923.5 | 12755.5 | Down |
| AA38823E  | 9.87561 | -2.0721 | 0.97575 | -2.1236 | 0.03371  | 0.1002   | 4.83751 | 13.4156 | 29.6014 | 6.2203  | 3.16808 | 2.0108  | Down |
| H2-K1     | 75866.3 | 0.76362 | 0.15228 | 5.01448 | 5.32E-07 | 6.97E-06 | 49360   | 60291.7 | 59081.5 | 86179.1 | 85482.1 | 114804  | Up   |
| Ring1     | 1471.76 | -0.4613 | 0.14767 | -3.1237 | 0.00179  | 0.00907  | 1446.41 | 1653.95 | 2014.8  | 1229.54 | 1205.98 | 1279.88 | Down |
| Col11a2   | 162.559 | 0.49797 | 0.2163  | 2.3022  | 0.02132  | 0.07012  | 145.125 | 125.532 | 133.684 | 226.004 | 171.076 | 173.934 | Up   |
| H2-DMa    | 3623.88 | 0.80305 | 0.13636 | 5.88928 | 3.88E-09 | 7.69E-08 | 2992.48 | 2437.81 | 2491.29 | 4782.37 | 5007.67 | 4031.66 | Up   |
| H2-DMb2   | 1044.63 | 0.75632 | 0.34118 | 2.21679 | 0.02664  | 0.08376  | 1141.65 | 607.536 | 581.524 | 1589.29 | 1640.01 | 707.802 | Up   |
| H2-DMb1   | 3494.95 | 0.95211 | 0.12733 | 7.47741 | 7.58E-14 | 3.31E-12 | 2224.29 | 2385.11 | 2536.17 | 4272.31 | 4268.45 | 5283.38 | Up   |
| Psmb9     | 2338.6  | 0.40365 | 0.13973 | 2.88875 | 0.00387  | 0.01746  | 2275.56 | 1867.65 | 1897.35 | 2508.85 | 3035.02 | 2447.15 | Up   |
| Tap1      | 3719.42 | 0.5902  | 0.13811 | 4.27351 | 1.92E-05 | 0.00017  | 3188.88 | 3079.84 | 2638.34 | 4184.19 | 5153.4  | 4071.87 | Up   |
| Psmb8     | 729.709 | 0.72941 | 0.1907  | 3.82483 | 0.00013  | 0.00096  | 667.576 | 509.794 | 469.802 | 961.036 | 1018.01 | 752.04  | Up   |
| Tap2      | 3577.45 | 0.23798 | 0.12068 | 1.97199 | 0.04861  | 0.13354  | 3532.35 | 3010.85 | 3305.8  | 3898.05 | 4241    | 3476.68 | Up   |
| H2-Ab1    | 22338.9 | 0.81567 | 0.08073 | 10.1035 | 5.33E-24 | 6.46E-22 | 16329.5 | 16097.8 | 16133.7 | 27411.8 | 27863.2 | 30197.2 | Up   |
| H2-Aa     | 33376.4 | 0.82878 | 0.1417  | 5.84872 | 4.95E-09 | 9.63E-08 | 22188.7 | 24116.5 | 25829.6 | 38968.1 | 38225   | 50930.6 | Up   |
| Gm20513   | 14.1902 | 1.50917 | 0.72719 | 2.07534 | 0.03796  | 0        |         |         |         |         |         |         |      |

|           |           |         |         |         |          |          |         |         |         |         |         |         |      |
|-----------|-----------|---------|---------|---------|----------|----------|---------|---------|---------|---------|---------|---------|------|
| C4b       | 17209.3   | 1.52116 | 0.25886 | 5.87639 | 4.19E-09 | 8.28E-08 | 13410.5 | 7381.47 | 5887.81 | 26037.1 | 24110.1 | 26429   | Up   |
| Stk19-ps1 | 3.24832   | 3.19151 | 1.52257 | 2.09614 | 0.03607  | 0.10575  | 0.9675  | 0.95826 | 0       | 7.25701 | 5.28013 | 5.027   | Up   |
| Cyp21a1   | 7.2945    | 6.36684 | 1.55461 | 4.09545 | 4.21E-05 | 0.00035  | 0       | 0       | 0       | 12.4406 | 24.2886 | 7.03781 | Up   |
| C4a       | 169.385   | 0.7865  | 0.30985 | 2.53834 | 0.01114  | 0.04175  | 164.475 | 85.285  | 123.18  | 245.702 | 241.83  | 155.837 | Up   |
| Ehmt2     | 7575.47   | 0.42849 | 0.12211 | 3.50901 | 0.00045  | 0.00283  | 6911.83 | 6224.85 | 6239.2  | 9283.79 | 9289.86 | 7503.31 | Up   |
| Slc44a4   | 3863.41   | 1.30125 | 0.16728 | 7.77902 | 7.31E-15 | 3.60E-13 | 1957.26 | 2823.99 | 1909.77 | 5714.38 | 5247.39 | 5527.69 | Up   |
| Neu1      | 3737.44   | 1.14361 | 0.16118 | 7.09528 | 1.29E-12 | 4.58E-11 | 2550.33 | 2309.4  | 2127.48 | 5268.59 | 6044.69 | 4124.15 | Up   |
| Hspa1b    | 794.01    | -0.6805 | 0.30927 | -2.2003 | 0.02779  | 0.08663  | 752.716 | 844.226 | 1336.84 | 559.827 | 390.729 | 879.726 | Down |
| Hspa1a    | 191.087   | -1.326  | 0.45034 | -2.9445 | 0.00323  | 0.01502  | 170.28  | 317.184 | 332.299 | 77.7537 | 55.9693 | 193.037 | Down |
| Vwa7      | 212.505   | 0.68115 | 0.18783 | 3.62636 | 0.00029  | 0.00191  | 177.053 | 137.989 | 174.744 | 250.885 | 261.894 | 272.464 | Up   |
| Msh5      | 325.123   | 0.35884 | 0.15925 | 2.25332 | 0.02424  | 0.07769  | 287.348 | 272.145 | 295.059 | 373.218 | 400.234 | 322.734 | Up   |
| Clic1     | 13704.6   | 0.68224 | 0.07565 | 9.01795 | 1.92E-19 | 1.60E-17 | 10356.1 | 10489.1 | 10724.3 | 17381.6 | 17018.9 | 16257.3 | Up   |
| Mpig6b    | 161.784   | -1.3996 | 0.33351 | -4.1967 | 2.71E-05 | 0.00024  | 145.125 | 334.432 | 224.397 | 91.231  | 74.9778 | 100.54  | Down |
| Ly6g6c    | 92.668    | -0.7435 | 0.34403 | -2.1613 | 0.03067  | 0.09324  | 154.8   | 109.241 | 84.0297 | 88.1208 | 66.5296 | 53.2862 | Down |
| Ly6g6d    | 208.365   | 0.45245 | 0.20232 | 2.23625 | 0.02534  | 0.08052  | 166.41  | 165.779 | 195.751 | 209.417 | 232.326 | 280.507 | Up   |
| Ly6g6e    | 111.247   | 1.44143 | 0.30111 | 4.78709 | 1.69E-06 | 1.99E-05 | 59.9851 | 78.5772 | 41.06   | 182.462 | 162.628 | 142.767 | Up   |
| Aif1      | 342.386   | 0.99983 | 0.15469 | 6.46333 | 1.02E-10 | 2.71E-09 | 248.648 | 213.692 | 222.488 | 425.053 | 489.996 | 454.441 | Up   |
| Tnf       | 174.351   | 2.12471 | 0.30486 | 6.9694  | 3.18E-12 | 1.05E-10 | 81.2701 | 74.7442 | 39.1502 | 230.151 | 324.2   | 296.593 | Up   |
| Lta       | 31.21     | 1.06615 | 0.432   | 2.46794 | 0.01359  | 0.04912  | 26.1225 | 17.2487 | 17.1879 | 43.5421 | 35.9049 | 47.2538 | Up   |
| H2-D1     | 107139    | 0.91335 | 0.22145 | 4.1244  | 3.72E-05 | 0.00032  | 96530.5 | 64395   | 62016.8 | 157249  | 160573  | 102070  | Up   |
| H2-Q2     | 781.148   | 1.25132 | 0.2174  | 5.75592 | 8.62E-09 | 1.59E-07 | 628.876 | 378.512 | 379.089 | 1183.93 | 1092.99 | 1023.5  | Up   |
| H2-Q4     | 11571.1   | 0.29406 | 0.08441 | 3.48366 | 0.00049  | 0.00307  | 10304.9 | 10620.4 | 10262.1 | 12362.8 | 13572   | 12304.1 | Up   |
| H2-Q7     | 6295.72   | 0.33332 | 0.14836 | 2.24672 | 0.02466  | 0.07877  | 5085.19 | 5830.05 | 5799.96 | 6228.59 | 6373.11 | 8457.43 | Up   |
| Tcf19     | 388.11    | 0.52112 | 0.19768 | 2.63616 | 0.00839  | 0.03303  | 395.708 | 296.102 | 264.503 | 496.587 | 462.539 | 413.22  | Up   |
| Cdsn      | 172.658   | 1.29117 | 0.35183 | 3.66984 | 0.00024  | 0.00164  | 80.3026 | 155.238 | 64.932  | 240.518 | 299.911 | 195.048 | Up   |
| 2300002N  | 72.9866   | 9.69043 | 1.31557 | 7.36597 | 1.76E-13 | 7.16E-12 | 0       | 0       | 0       | 176.242 | 215.429 | 46.2484 | Up   |
| Sfta2     | 1241.44   | 0.97541 | 0.19888 | 4.90465 | 9.36E-07 | 1.16E-05 | 1067.15 | 623.826 | 820.244 | 1804.92 | 1566.09 | 1566.41 | Up   |
| Gm20483   | 26.0834   | 1.3931  | 0.53004 | 2.62831 | 0.00858  | 0.03368  | 11.61   | 8.62433 | 22.9172 | 34.2116 | 35.9049 | 43.2322 | Up   |
| Vars2     | 577.476   | 1.39499 | 0.14798 | 9.42704 | 4.22E-21 | 4.00E-19 | 343.463 | 273.104 | 338.029 | 783.757 | 843.764 | 882.742 | Up   |
| Gtf2h4    | 683.736   | -0.343  | 0.14949 | -2.2943 | 0.02177  | 0.07129  | 656.933 | 861.475 | 775.365 | 571.23  | 645.231 | 592.181 | Down |
| Ddr1      | 5416.96   | 0.31636 | 0.11748 | 2.69286 | 0.00708  | 0.02883  | 4996.18 | 4943.66 | 4536.65 | 6247.25 | 5259.01 | 6519.02 | Up   |
| 4833427F  | 81.9435   | 0.85701 | 0.37831 | 2.26536 | 0.02349  | 0.07583  | 75.4651 | 50.7877 | 48.699  | 132.7   | 63.3615 | 120.648 | Up   |
| Ier3      | 9866.09   | 0.66759 | 0.15923 | 4.19259 | 2.76E-05 | 0.00024  | 8184.09 | 6617.73 | 8067.81 | 11534.5 | 14538.3 | 10254.1 | Up   |
| Tubb5     | 14541.4   | 0.30684 | 0.11913 | 2.57562 | 0.01001  | 0.03823  | 12158.6 | 12433.4 | 14410.1 | 16652.8 | 17186.8 | 14406.4 | Up   |
| Prr3      | 1131.29   | -0.2399 | 0.11562 | -2.0747 | 0.03802  | 0.11011  | 1152.29 | 1204.53 | 1318.69 | 1018.05 | 984.216 | 1109.96 | Down |
| A930015C  | 1231.62   | -0.543  | 0.18999 | -2.8583 | 0.00426  | 0.01894  | 1246.14 | 1634.79 | 1501.08 | 793.088 | 1231.33 | 983.282 | Down |
| Gm10499   | 59.6216   | -1.0075 | 0.34199 | -2.9459 | 0.00322  | 0.01497  | 63.8551 | 72.8277 | 102.172 | 37.3218 | 44.3531 | 37.1998 | Down |
| Rpp21     | 804.707   | -0.2619 | 0.12589 | -2.0807 | 0.03747  | 0.1089   | 883.329 | 813.562 | 935.785 | 795.161 | 689.585 | 710.818 | Down |
| Trim26    | 4100.47   | 0.33227 | 0.11608 | 2.86258 | 0.0042   | 0.01874  | 3860.33 | 3444.94 | 3585.59 | 4831.1  | 4848.21 | 4032.66 | Up   |
| Trim15    | 299.016   | 0.79347 | 0.17034 | 4.65812 | 3.19E-06 | 3.53E-05 | 190.598 | 218.483 | 247.315 | 364.924 | 369.609 | 403.166 | Up   |
| Trim10    | 70.5002   | 0.90554 | 0.45659 | 1.98328 | 0.04734  | 0.13077  | 73.5301 | 53.6625 | 20.0525 | 104.708 | 86.5941 | 84.4537 | Up   |
| Trim31    | 37.9242   | 0.10589 | 0.75236 | 5.45738 | 4.83E-08 | 7.68E-07 | 3.87001 | 5.74955 | 2.86465 | 78.7904 | 116.163 | 20.108  | Up   |
| Znrd1     | 1275.57   | -0.4521 | 0.12726 | -3.5526 | 0.00038  | 0.00245  | 1459.96 | 1414.39 | 1546.91 | 1196.37 | 1087.71 | 948.093 | Down |
| H2-M6-p   | 20.4493   | -1.253  | 0.58397 | -2.1456 | 0.03191  | 0.0961   | 23.22   | 42.1634 | 21.0074 | 13.4773 | 14.7844 | 8.04321 | Down |
| 2410137N  | 14.3889   | -2.1938 | 0.8669  | -2.5306 | 0.01139  | 0.04254  | 4.83751 | 33.5391 | 32.466  | 5.18358 | 5.28013 | 5.027   | Down |
| H2-M5     | 168.273   | -1.1264 | 0.27757 | -4.0581 | 4.95E-05 | 0.0004   | 155.768 | 267.354 | 269.277 | 96.4146 | 118.275 | 102.551 | Down |
| Mog       | 55.4044   | -1.5447 | 0.37631 | -4.1048 | 4.05E-05 | 0.00034  | 66.7576 | 74.7442 | 105.992 | 32.1382 | 31.6808 | 21.1134 | Down |
| H2-M2     | 241.742   | 3.52162 | 0.28856 | 12.2043 | 2.95E-34 | 8.83E-32 | 40.6351 | 41.2051 | 34.3758 | 428.164 | 318.92  | 587.154 | Up   |
| Olfr110   | 2.06421   | 4.5469  | 2.10632 | 2.15869 | 0.03087  | NA       | 0       | 0       | 0       | 7.25701 | 2.11205 | 3.0162  | Up   |
| Olfr111   | 3.58197   | 5.3433  | 1.79413 | 2.9782  | 0.0029   | 0.01366  | 0       | 0       | 0       | 4.14686 | 5.28013 | 12.0648 | Up   |
| Gm20541   | 2.05499   | 4.54113 | 2.0815  | 2.18167 | 0.02913  | NA       | 0       | 0       | 0       | 2.07343 | 4.2241  | 6.03241 | Up   |
| Esp8      | 2.05577   | 4.54157 | 2.17783 | 2.08537 | 0.03704  | NA       | 0       | 0       | 0       | 7.25701 | 1.05603 | 4.0216  | Up   |
| Crisp2    | 41.761    | 2.15022 | 0.39164 | 5.49029 | 4.01E-08 | 6.46E-07 | 11.61   | 18.2069 | 16.233  | 66.3498 | 71.8097 | 66.3565 | Up   |
| Cd2ap     | 7182.04   | 0.32518 | 0.09546 | 3.40633 | 0.00066  | 0.00392  | 6249.09 | 6670.44 | 6208.65 | 7364.83 | 8202.15 | 8397.11 | Up   |
| Tnfrsf21  | 3466.1    | 0.39192 | 0.11896 | 3.29467 | 0.00099  | 0.00551  | 2862.84 | 3333.78 | 2797.81 | 4244.31 | 3927.36 | 3630.5  | Up   |
| Slc25a27  | 589.688   | -0.6456 | 0.16952 | -3.8086 | 0.00014  | 0.00102  | 753.684 | 644.908 | 760.087 | 453.045 | 386.505 | 539.9   | Down |
| Rcan2     | 2213.86   | -0.5822 | 0.22984 | -2.5332 | 0.0113   | 0.04227  | 2292.98 | 3737.21 | 1933.64 | 1797.67 | 1882.89 | 1638.8  | Down |
| Enpp5     | 6952.72   | 0.32903 | 0.1084  | 3.03534 | 0.0024   | 0.01164  | 6606.1  | 6368.59 | 5515.4  | 7561.81 | 7472.44 | 8192.01 | Up   |
| Runx2     | 570.834   | 0.66333 | 0.1731  | 3.83205 | 0.00013  | 0.00094  | 471.173 | 449.423 | 404.87  | 710.15  | 816.308 | 573.078 | Up   |
| Nfkbia    | 819.841   | 1.3856  | 0.16122 | 8.59471 | 8.35E-18 | 6.19E-16 | 535.996 | 453.256 | 372.404 | 1248.21 | 1127.84 | 1181.35 | Up   |
| Slc35b2   | 2283.18   | 0.44909 | 0.13816 | 3.25043 | 0.00115  | 0.00629  | 2151.72 | 1950.06 | 1690.14 | 2840.6  | 2734.05 | 2332.53 | Up   |
| Slc29a1   | 2888.87   | -0.4729 | 0.15724 | -3.0078 | 0.00263  | 0.01258  | 3589.43 | 3053.01 | 3431.85 | 2534.77 | 2784.74 | 1939.42 | Down |
| Tmem63b   | 5456.57   | 0.35969 | 0.1156  | 3.11148 | 0.00186  | 0.00939  | 5358.02 | 4325.58 | 4656.01 | 6474.29 | 6071.09 | 5854.45 | Up   |
| Xpo5      | 2555.3    | 0.27183 | 0.08732 | 3.11313 | 0.00185  | 0.00934  | 2334.58 | 2202.08 | 2409.17 | 2760.77 | 2810.08 | 2815.12 | Up   |
| Polr1c    | 2900.4    | 0.41904 | 0.10354 | 4.04707 | 5.19E-05 | 0.00042  | 2493.25 | 2422.48 | 2530.44 | 3575.63 | 3362.38 | 3018.21 | Up   |
| Yipf3     | 4618.19   | 0.21388 | 0.10029 | 2.13256 | 0.03296  | 0.09847  | 4269.58 | 4354.33 | 4205.3  | 5256.15 | 5139.68 | 4484.09 | Up   |
| Lrrc73    | 285.102   | -0.7473 | 0.19304 | -3.8715 | 0.00011  | 0.00081  | 324.113 | 381.387 | 366.675 | 228.077 | 171.076 | 239.285 | Down |
| Klc4      | 2631.66   | 0.28824 | 0.11039 | 2.6111  | 0.00903  | 0.03506  | 2481.64 | 2378.4  | 2248.75 | 3135.03 | 2922.02 | 2624.1  | Up   |
| Gnmt      | 404.154   | -0.584  | 0.21592 | -2.7047 | 0.00684  | 0.028    | 488.588 | 509.794 | 456.434 | 288.207 | 256.614 | 425.285 | Down |
| 2310039H  | 295.367   | -0.3328 | 0.16173 | -2.0579 | 0.0396   | 0.11362  | 306.698 | 368.93  | 312.247 | 270.583 | 251.334 | 262.41  | Down |
| Bicral    | 2591.32   | -0.2701 | 0.10597 | -2.5484 | 0.01082  | 0.04083  | 2798.98 | 2659.17 | 3041.3  | 2182.29 | 2434.14 | 2432.06 | Down |
| Tbcc      | 838.707   | -0.2424 | 0.11548 | -2.099  | 0.03582  | 0.10514  | 887.199 | 956.342 | 883.267 | 784.794 | 806.803 | 713.835 | Down |
| Foxp4     | 3617.01   | 0.21372 | 0.09743 | 2.19352 | 0.02827  | 0.08787  | 3366.91 | 3103.8  | 3577.95 | 3941.59 | 3971.71 | 3740.09 | Up   |
| Trem1     | 436.487   | 2.07704 | 0.66603 | 3.11853 | 0.00182  | 0.00919  | 296.055 | 118.824 | 86.8943 | 748.509 | 1012.73 | 355.912 | Up   |
| Trem2     | 303.482   | -0.4353 | 0.19891 | -2.1885 | 0.02863  | 0.08873  | 335.723 | 397.677 | 313.202 | 248.812 | 307.303 | 218.172 | Down |
| Trem2     | 619.282   | 2.5299  | 0.30899 | 8.18777 | 2.66E-16 | 1.59E-14 | 276.705 | 162.904 | 108.857 | 1069.89 | 1259.84 | 837.499 | Up   |
| Trem1     | 122.689   | -1.4114 | 0.45459 | -3.1048 | 0.0019   | 0.00957  | 83.2051 | 288.436 | 163.285 | 58.0561 | 91.8742 | 51.2754 | Down |
| Oard1     | 2211.24</ |         |         |         |          |          |         |         |         |         |         |         |      |

|           |         |         |         |         |          |          |         |         |         |         |         |         |      |
|-----------|---------|---------|---------|---------|----------|----------|---------|---------|---------|---------|---------|---------|------|
| Satb1     | 813.837 | -0.7185 | 0.10814 | -6.6447 | 3.04E-11 | 8.77E-10 | 1023.62 | 1025.34 | 988.304 | 583.671 | 635.727 | 626.365 | Down |
| Sgo1      | 75.9454 | 0.88074 | 0.30731 | 2.86592 | 0.00416  | 0.01857  | 60.9526 | 53.6625 | 45.8344 | 90.1943 | 82.37   | 122.659 | Up   |
| Sult1c2   | 36.7958 | 2.67907 | 0.83045 | 3.22604 | 0.00126  | 0.00676  | 12.5775 | 17.2487 | 0       | 98.488  | 41.185  | 51.2754 | Up   |
| Sult1c1   | 83.7876 | 4.44617 | 2.05894 | 2.15945 | 0.03082  | 0.0936   | 0.9675  | 21.0817 | 0       | 327.602 | 5.28013 | 147.794 | Up   |
| Stap2     | 3090.93 | 0.41382 | 0.09669 | 4.28007 | 1.87E-05 | 0.00017  | 2555.17 | 2581.55 | 2814.99 | 3605.7  | 3662.3  | 3325.87 | Up   |
| Ubxn6     | 669.156 | 0.30573 | 0.14206 | 2.15203 | 0.03139  | 0.09492  | 684.991 | 556.748 | 553.832 | 704.967 | 781.459 | 732.937 | Up   |
| Plin4     | 1167.44 | -3.0161 | 0.6144  | -4.909  | 9.16E-07 | 1.14E-05 | 1351.6  | 3843.58 | 1038.91 | 200.086 | 239.718 | 330.777 | Down |
| Plin5     | 533.437 | -0.5606 | 0.28578 | -1.9618 | 0.04979  | 0.1364   | 531.158 | 913.22  | 463.118 | 463.412 | 319.976 | 509.738 | Down |
| Lrg1      | 36392.2 | 3.79641 | 0.2583  | 14.6978 | 6.66E-49 | 5.75E-46 | 6343.91 | 5534.9  | 2781.57 | 66464.9 | 76270.4 | 60957.5 | Up   |
| Sema6b    | 784.027 | 0.51702 | 0.16966 | 3.04745 | 0.00231  | 0.01123  | 737.236 | 630.534 | 567.2   | 912.31  | 1067.64 | 789.24  | Up   |
| Tnfaip8l1 | 155.212 | 1.22204 | 0.21027 | 5.81192 | 6.18E-09 | 1.17E-07 | 95.7826 | 80.4937 | 103.127 | 231.188 | 218.597 | 202.086 | Up   |
| Mydgf     | 2615.59 | 0.47664 | 0.1061  | 4.49224 | 7.05E-06 | 7.21E-05 | 2220.42 | 2111.04 | 2230.61 | 3290.54 | 3074.09 | 2766.86 | Up   |
| Dpp9      | 5639.37 | 0.70271 | 0.10929 | 6.42949 | 1.28E-10 | 3.34E-09 | 3903.87 | 4423.32 | 4550.02 | 7148.16 | 7375.28 | 6435.57 | Up   |
| Ticam1    | 939.565 | 0.32725 | 0.12166 | 2.68984 | 0.00715  | 0.02901  | 835.921 | 828.894 | 835.523 | 1167.34 | 988.44  | 981.271 | Up   |
| Plin3     | 4530.24 | 0.21776 | 0.09864 | 2.20762 | 0.02727  | 0.0853   | 4336.34 | 4146.39 | 4084.03 | 5137.96 | 5028.79 | 4447.89 | Up   |
| Arrdc5    | 5.63893 | -3.3222 | 1.29353 | -2.5683 | 0.01022  | 0.03892  | 14.5125 | 11.4991 | 4.77441 | 1.03672 | 0       | 2.0108  | Down |
| Uhrf1     | 343.75  | 0.89582 | 0.22656 | 3.95402 | 7.68E-05 | 0.0006   | 240.908 | 243.398 | 236.811 | 463.412 | 319.976 | 557.997 | Up   |
| Gm20219   | 604.894 | -0.6042 | 0.20051 | -3.0131 | 0.00259  | 0.0124   | 570.826 | 772.356 | 846.026 | 561.9   | 409.738 | 468.517 | Down |
| Rpl36     | 3867.54 | -0.2526 | 0.12047 | -2.097  | 0.03599  | 0.10555  | 4403.1  | 3702.71 | 4509.91 | 3707.3  | 3633.78 | 3248.45 | Down |
| Catsperd  | 208.621 | 1.50291 | 0.20998 | 7.15744 | 8.22E-13 | 2.97E-11 | 113.198 | 114.033 | 99.3078 | 339.006 | 252.39  | 333.793 | Up   |
| Vmac      | 1748.22 | 0.48605 | 0.13506 | 3.59882 | 0.00032  | 0.0021   | 1666.04 | 1400.02 | 1303.42 | 2212.35 | 2003.28 | 1904.23 | Up   |
| Gm17949   | 18.59   | -1.316  | 0.57762 | -2.2784 | 0.0227   | 0.07374  | 16.4475 | 32.5808 | 30.5563 | 9.33044 | 10.5603 | 12.0648 | Down |
| Crnb3     | 2102.39 | 0.60355 | 0.12139 | 4.97209 | 6.62E-07 | 8.52E-06 | 1802.46 | 1529.38 | 1674.86 | 2748.33 | 2562.97 | 2296.34 | Up   |
| Dennd1c   | 1466.64 | 0.54651 | 0.12093 | 4.51939 | 6.20E-06 | 6.42E-05 | 1342.89 | 1090.5  | 1142.99 | 1708.51 | 1804.75 | 1710.19 | Up   |
| Tubb4a    | 1278.46 | -1.2357 | 0.20542 | -6.0155 | 1.79E-09 | 3.75E-08 | 1335.15 | 1981.68 | 2067.32 | 799.308 | 866.997 | 620.332 | Down |
| Gm11110   | 131.717 | 0.52748 | 0.26499 | 1.99053 | 0.04653  | 0.12899  | 119.003 | 87.2015 | 117.451 | 130.626 | 193.253 | 142.767 | Up   |
| Tnfsf14   | 132.647 | 0.87615 | 0.29136 | 3.00711 | 0.00264  | 0.0126   | 123.84  | 91.9928 | 64.932  | 159.654 | 158.404 | 197.059 | Up   |
| C3        | 35078.9 | 0.83923 | 0.19248 | 4.36002 | 1.30E-05 | 0.00012  | 31337.4 | 24592.7 | 19533.1 | 45672.5 | 37363.2 | 51974.2 | Up   |
| Gpr108    | 4831.77 | 0.33183 | 0.08251 | 4.02178 | 5.78E-05 | 0.00047  | 4336.34 | 4261.38 | 4237.77 | 5595.16 | 5437.47 | 5122.52 | Up   |
| Vav1      | 1197.44 | 1.2813  | 0.19066 | 6.72035 | 1.81E-11 | 5.48E-10 | 855.271 | 697.612 | 541.419 | 1598.62 | 1949.42 | 1542.28 | Up   |
| Adgre1    | 1949.81 | 1.99847 | 0.29415 | 6.79406 | 1.09E-11 | 3.39E-10 | 1145.52 | 767.565 | 428.742 | 2611.49 | 3466.93 | 3278.61 | Up   |
| Cntnap5c  | 124.291 | 2.18173 | 0.36579 | 5.96448 | 2.45E-09 | 5.03E-08 | 67.7251 | 41.2051 | 25.7818 | 196.976 | 248.166 | 165.891 | Up   |
| Efn5      | 325.389 | 0.62025 | 0.19597 | 3.16504 | 0.00155  | 0.00805  | 287.348 | 277.895 | 204.345 | 351.447 | 394.953 | 436.344 | Up   |
| Man2a1    | 5657.87 | 0.58477 | 0.10049 | 5.81897 | 5.92E-09 | 1.13E-07 | 4544.35 | 4712.72 | 4322.75 | 6484.66 | 7406.96 | 6475.79 | Up   |
| Tmem232   | 1548.71 | -0.6744 | 0.29925 | -2.2535 | 0.02423  | 0.07767  | 1591.54 | 2446.43 | 1674.86 | 1236.8  | 671.632 | 1670.98 | Down |
| Ndufv2    | 5259.16 | -0.3242 | 0.14234 | -2.2777 | 0.02274  | 0.07383  | 5180.97 | 7050.87 | 5311.06 | 4799.99 | 4584.21 | 4627.86 | Down |
| Gm20742   | 3.51388 | -5.2098 | 1.91531 | -2.7201 | 0.00653  | 0.02694  | 1.935   | 14.3739 | 4.77441 | 0       | 0       | 0       | Down |
| Themis3   | 39.0081 | 1.95536 | 0.4158  | 4.70264 | 2.57E-06 | 2.90E-05 | 10.6425 | 19.1652 | 18.1428 | 59.0928 | 69.6977 | 57.3078 | Up   |
| Arhgap28  | 1155.59 | -0.7796 | 0.18548 | -4.2032 | 2.63E-05 | 0.00023  | 1201.64 | 1305.15 | 1874.44 | 833.52  | 892.341 | 826.44  | Down |
| Tgfr1     | 1571.96 | 0.67252 | 0.09007 | 7.46667 | 8.22E-14 | 3.56E-12 | 1201.64 | 1250.53 | 1184.05 | 1962.5  | 1896.62 | 1936.4  | Up   |
| Myl12b    | 616.302 | -0.365  | 0.14203 | -2.5697 | 0.01018  | 0.03877  | 671.446 | 669.823 | 740.034 | 556.716 | 589.262 | 470.528 | Down |
| Myom1     | 1777.06 | -2.227  | 0.51008 | -4.3659 | 1.27E-05 | 0.00012  | 1741.5  | 5142.97 | 1901.17 | 629.287 | 644.175 | 603.241 | Down |
| Emilin2   | 864.888 | 0.70504 | 0.25239 | 2.79346 | 0.00521  | 0.02247  | 658.868 | 843.268 | 470.757 | 1085.44 | 1332.7  | 798.288 | Up   |
| Ndc80     | 105.553 | 0.60048 | 0.28288 | 2.12277 | 0.03377  | 0.10031  | 92.8801 | 97.7424 | 61.1125 | 143.067 | 109.827 | 128.691 | Up   |
| Pcare     | 21.9153 | 1.60205 | 0.61168 | 2.61912 | 0.00882  | 0.03443  | 3.87001 | 15.3321 | 13.3684 | 25.9179 | 33.7928 | 39.2106 | Up   |
| Clp4      | 6529.56 | 1.27193 | 0.17848 | 7.1264  | 1.03E-12 | 3.69E-11 | 3513    | 4814.29 | 3145.38 | 8065.65 | 9407.07 | 10232   | Up   |
| Ypel5     | 4118.24 | 0.4773  | 0.10216 | 4.67208 | 2.98E-06 | 3.32E-05 | 3704.56 | 3205.38 | 3419.44 | 4814.51 | 5037.24 | 4528.33 | Up   |
| Lbh       | 10486.8 | -0.3416 | 0.13049 | -2.618  | 0.00884  | 0.03451  | 12125.7 | 11773.2 | 11268.6 | 9093.03 | 10714.4 | 7945.68 | Down |
| Capn13    | 121.264 | -1.3657 | 0.50395 | -2.7101 | 0.00673  | 0.02759  | 88.0426 | 235.732 | 200.525 | 55.9827 | 31.6808 | 115.621 | Down |
| Ehd3      | 2841.46 | 1.70398 | 0.17648 | 9.65521 | 4.67E-22 | 4.85E-20 | 1316.77 | 1426.85 | 1260.45 | 3774.68 | 3716.15 | 5553.83 | Up   |
| Memo1     | 2477.98 | 0.29751 | 0.09531 | 3.12152 | 0.0018   | 0.00912  | 2084.97 | 2347.73 | 2237.29 | 2793.95 | 2766.79 | 2637.17 | Up   |
| Slc30a6   | 1197.03 | 0.20677 | 0.09551 | 2.16491 | 0.03039  | 0.09267  | 1148.42 | 1096.25 | 1089.52 | 1256.5  | 1312.64 | 1278.87 | Up   |
| Nlrc4     | 272.553 | 1.57372 | 0.21013 | 7.4893  | 6.92E-14 | 3.04E-12 | 160.605 | 147.572 | 103.127 | 406.393 | 382.281 | 435.339 | Up   |
| Ltbp1     | 4508.86 | -0.3394 | 0.14949 | -2.2702 | 0.0232   | 0.07512  | 4312.15 | 4907.24 | 5890.67 | 3744.62 | 4476.49 | 3721.99 | Down |
| Fez2      | 3685.42 | -0.2487 | 0.11545 | -2.1542 | 0.03123  | 0.09449  | 3859.36 | 4090.81 | 4056.34 | 3328.89 | 3768.95 | 3008.16 | Down |
| Vit       | 306.058 | 1.55023 | 0.27851 | 5.5662  | 2.60E-08 | 4.34E-07 | 148.028 | 151.405 | 168.059 | 502.807 | 280.903 | 585.143 | Up   |
| Strn      | 2348.13 | 0.24877 | 0.09048 | 2.74938 | 0.00597  | 0.02507  | 2089.8  | 2192.5  | 2156.13 | 2443.54 | 2681.25 | 2525.57 | Up   |
| Gm6548    | 1190.73 | 0.69671 | 0.09524 | 7.31515 | 2.57E-13 | 1.02E-11 | 921.061 | 912.262 | 892.816 | 1471.1  | 1433.03 | 1514.13 | Up   |
| Eif2ak2   | 1294.77 | 0.75396 | 0.14939 | 5.04692 | 4.49E-07 | 5.98E-06 | 1060.38 | 851.892 | 979.71  | 1461.77 | 1541.8  | 1873.06 | Up   |
| Sult6b1   | 95.3308 | 0.82414 | 0.24508 | 3.36273 | 0.00077  | 0.00449  | 68.6926 | 72.8277 | 64.932  | 135.81  | 115.107 | 114.616 | Up   |
| Ndufaf7   | 1849.37 | -0.4311 | 0.10213 | -4.221  | 2.43E-05 | 0.00022  | 1983.38 | 2144.58 | 2243.02 | 1614.17 | 1496.39 | 1614.67 | Down |
| Prkd3     | 4556.76 | -0.2937 | 0.11305 | -2.5977 | 0.00938  | 0.03627  | 5346.41 | 4450.15 | 5260.45 | 3960.25 | 3975.94 | 4347.35 | Down |
| Cdc42ep3  | 3012.99 | 0.69284 | 0.18041 | 3.84034 | 0.00012  | 0.00091  | 2688.69 | 2147.46 | 2073.05 | 3798.53 | 4438.47 | 2931.75 | Up   |
| Rmdn2     | 3598.48 | 0.58395 | 0.15203 | 3.84106 | 0.00012  | 0.00091  | 3270.15 | 2307.49 | 3062.31 | 4236.02 | 4637.01 | 4077.91 | Up   |
| Cyp1b1    | 906.72  | -1.7369 | 0.17002 | -10.216 | 1.68E-24 | 2.15E-22 | 1558.64 | 1483.38 | 1142.99 | 378.401 | 402.346 | 474.549 | Down |
| Atl2      | 4429.01 | 0.29706 | 0.08662 | 3.42963 | 0.0006   | 0.00363  | 4151.55 | 4000.73 | 3771.79 | 4767.86 | 4846.1  | 5036.05 | Up   |
| Srsf7     | 8689.33 | -0.3576 | 0.10222 | -3.4985 | 0.00047  | 0.00293  | 9375.09 | 9204.07 | 10703.3 | 7986.86 | 7273.9  | 7592.79 | Down |
| Gemin6    | 227.231 | -0.3848 | 0.16871 | -2.2807 | 0.02257  | 0.07333  | 267.998 | 250.106 | 253.999 | 179.352 | 203.813 | 208.118 | Down |
| Arhgef33  | 190.386 | -0.8572 | 0.23351 | -3.6709 | 0.00024  | 0.00163  | 223.493 | 252.98  | 259.728 | 126.479 | 107.715 | 171.924 | Down |
| Tmem178   | 1152.6  | -0.695  | 0.15553 | -4.4685 | 7.88E-06 | 7.94E-05 | 1440.61 | 1343.48 | 1490.57 | 799.308 | 1064.47 | 777.175 | Down |
| Gm19689   | 28.6609 | 2.42472 | 0.97669 | 2.48259 | 0.01304  | 0.04747  | 18.3825 | 8.62433 | 0       | 60.1295 | 70.7537 | 14.0756 | Up   |
| Mta3      | 2291.22 | 0.48633 | 0.12212 | 3.98246 | 6.82E-05 | 0.00054  | 2054.01 | 2009.47 | 1662.45 | 2678.87 | 2806.92 | 2535.62 | Up   |
| 4933433H  | 4.43149 | 3.68762 | 1.58686 | 2.32385 | 0.02013  | 0.06711  | 0       | 0       | 1.90977 | 3.11015 | 9.50423 | 12.0648 | Up   |
| Gm19696   | 31.7212 | 1.23441 | 0.59278 | 2.08241 | 0.03731  | 0.10854  | 30.96   | 18.2069 | 7.63906 | 49.7624 | 27.4567 | 56.3024 | Up   |
| Zfp3612   | 7311.68 | 0.47359 | 0.14203 | 3.33451 | 0.00085  | 0.00487  | 6514.19 | 6058.11 | 5794.23 | 8433.68 | 9944.59 | 7125.28 | Up   |
| Plekhh2   | 32.4876 | 0.89607 | 0.42958 | 2.08591 | 0.03699  | 0.10786  | 21.285  | 18.2069 | 28.6465 | 49.7624 | 33.7928 | 43.2322 | Up   |
| Abcg8     | 16.7898 | 2.58464 | 0.67924 | 3.80522 | 0.0      |          |         |         |         |         |         |         |      |

|          |         |         |         |         |          |          |         |         |         |         |         |         |      |
|----------|---------|---------|---------|---------|----------|----------|---------|---------|---------|---------|---------|---------|------|
| Ttc7     | 4171.26 | 0.99422 | 0.14956 | 6.64781 | 2.97E-11 | 8.62E-10 | 3221.78 | 2704.21 | 2438.77 | 5454.16 | 6301.3  | 4907.36 | Up   |
| Epcam    | 6475.54 | 0.61285 | 0.15627 | 3.9216  | 8.80E-05 | 0.00068  | 4891.69 | 5045.23 | 5424.69 | 8243.96 | 6160.85 | 9086.81 | Up   |
| Gm31499  | 3.80228 | 4.40243 | 1.69503 | 2.59726 | 0.0094   | 0.0363   | 0.9675  | 0       | 0       | 4.14686 | 12.6723 | 5.027   | Up   |
| Gm31615  | 45.6397 | -1.177  | 0.48058 | -2.4491 | 0.01432  | 0.05115  | 33.8626 | 81.452  | 74.4809 | 25.9179 | 38.0169 | 20.108  | Down |
| Ston1    | 3830.35 | -0.5709 | 0.15891 | -3.5928 | 0.00033  | 0.00214  | 4509.52 | 5060.56 | 4165.2  | 3321.64 | 3467.99 | 2457.2  | Down |
| Lhcgr    | 22.7995 | -2.1846 | 0.6494  | -3.364  | 0.00077  | 0.00447  | 21.285  | 48.8712 | 42.0148 | 11.4039 | 3.16808 | 10.054  | Down |
| Nrxn1    | 63.5485 | -0.8912 | 0.37661 | -2.3663 | 0.01797  | 0.0614   | 69.6601 | 110.2   | 67.7967 | 54.9459 | 47.5211 | 31.1674 | Down |
| Gm20939  | 165.473 | 0.68097 | 0.21425 | 3.17846 | 0.00148  | 0.00776  | 138.353 | 120.741 | 122.225 | 194.903 | 238.662 | 177.956 | Up   |
| Crem     | 1654.92 | -0.4867 | 0.19132 | -2.5437 | 0.01097  | 0.04121  | 1472.54 | 1896.39 | 2425.4  | 1269.98 | 1339.04 | 1526.2  | Down |
| Bambi    | 1453.36 | -0.5531 | 0.16485 | -3.3551 | 0.00079  | 0.00458  | 1970.8  | 1537.05 | 1677.73 | 1343.58 | 1220.77 | 970.212 | Down |
| Map3k8   | 1381.33 | 0.23237 | 0.08957 | 2.59437 | 0.00948  | 0.03654  | 1280.97 | 1253.4  | 1276.68 | 1484.58 | 1474.21 | 1518.16 | Up   |
| Jcad     | 16171.8 | -0.379  | 0.10236 | -3.7025 | 0.00021  | 0.00147  | 16872.3 | 17670.3 | 20308.4 | 14172.9 | 14100.1 | 13906.7 | Down |
| Gm10556  | 138.995 | 8.75797 | 1.13295 | 7.73021 | 1.07E-14 | 5.14E-13 | 1.935   | 0       | 0       | 496.587 | 139.395 | 196.053 | Up   |
| Gm26682  | 18.302  | -2.203  | 0.58918 | -3.7391 | 0.00018  | 0.00131  | 28.0575 | 29.706  | 32.466  | 4.14686 | 7.39218 | 8.04321 | Down |
| Zfp438   | 461.362 | -0.398  | 0.1347  | -2.955  | 0.00313  | 0.01459  | 520.516 | 527.042 | 526.14  | 430.237 | 401.29  | 362.95  | Down |
| Gm10125  | 244.699 | -0.6106 | 0.17774 | -3.4356 | 0.00059  | 0.00357  | 280.575 | 299.935 | 306.517 | 180.389 | 222.821 | 177.956 | Down |
| Zeb1     | 4593.53 | -0.2694 | 0.12353 | -2.1812 | 0.02917  | 0.08998  | 5031.01 | 4726.13 | 5306.28 | 3834.81 | 4769.01 | 3893.92 | Down |
| Epc1     | 2830.95 | -0.2924 | 0.11665 | -2.5067 | 0.01219  | 0.04495  | 3169.53 | 2775.12 | 3406.07 | 2451.83 | 2481.66 | 2701.51 | Down |
| Mkx      | 24.7106 | -1.3152 | 0.51858 | -2.5362 | 0.0112   | 0.04195  | 44.5051 | 26.8312 | 34.3758 | 15.5507 | 17.9524 | 9.04861 | Down |
| Armc4    | 1167.62 | -0.5548 | 0.24588 | -2.2566 | 0.02403  | 0.0772   | 1214.21 | 1589.75 | 1364.53 | 949.632 | 617.775 | 1269.82 | Down |
| Greb1l   | 277.498 | -2.5944 | 0.20884 | -12.423 | 1.96E-35 | 6.40E-33 | 455.693 | 450.382 | 522.321 | 61.1662 | 93.9863 | 81.4375 | Down |
| Esco1    | 2039.68 | 0.40068 | 0.1076  | 3.7239  | 0.0002   | 0.00137  | 1754.08 | 1684.62 | 1836.24 | 2342.98 | 2125.78 | 2494.4  | Up   |
| Gata6os  | 817.974 | -0.3038 | 0.12918 | -2.352  | 0.01867  | 0.06331  | 879.459 | 879.681 | 952.018 | 789.977 | 758.226 | 648.484 | Down |
| Rbbp8    | 2481.31 | 1.11683 | 0.15626 | 7.1473  | 8.85E-13 | 3.19E-11 | 1876.95 | 1300.36 | 1521.13 | 3605.7  | 3467.99 | 3115.74 | Up   |
| Gm6277   | 225.111 | -0.4452 | 0.2213  | -2.0119 | 0.04423  | 0.12391  | 275.738 | 259.688 | 243.495 | 185.572 | 148.9   | 237.275 | Down |
| Tmem241  | 848.345 | 0.24067 | 0.10575 | 2.27575 | 0.02286  | 0.07416  | 769.164 | 796.313 | 767.726 | 962.072 | 905.014 | 889.78  | Up   |
| Gm25289  | 2.23579 | -4.5576 | 2.18815 | -2.0828 | 0.03727  | NA       | 0.9675  | 9.58259 | 2.86465 | 0       | 0       | 0       | Down |
| Rmc1     | 2806.69 | 0.44976 | 0.09672 | 4.65028 | 3.31E-06 | 3.66E-05 | 2317.17 | 2318.99 | 2481.74 | 3325.78 | 3378.23 | 3018.21 | Up   |
| Npc1     | 2572.08 | 1.00652 | 0.1326  | 7.59034 | 3.19E-14 | 1.45E-12 | 1927.26 | 1538.96 | 1662.45 | 3148.51 | 3793.24 | 3362.06 | Up   |
| Ankrd29  | 1069.13 | -0.3422 | 0.16877 | -2.0274 | 0.04262  | 0.12041  | 1021.68 | 1144.16 | 1419.91 | 952.742 | 1052.86 | 823.423 | Down |
| Lama3    | 6744.25 | 0.65441 | 0.15687 | 4.17157 | 3.03E-05 | 0.00026  | 6075.91 | 4288.21 | 5356.89 | 9335.26 | 7771.75 | 7771.75 | Up   |
| Ttc39c   | 810.877 | -0.6046 | 0.13847 | -4.3661 | 1.26E-05 | 0.00012  | 854.304 | 1097.21 | 983.529 | 635.507 | 624.111 | 670.602 | Down |
| Zfp521   | 632.938 | -0.5136 | 0.14737 | -3.485  | 0.00049  | 0.00306  | 830.116 | 688.03  | 715.207 | 462.375 | 544.909 | 556.992 | Down |
| 8430422H | 2.07587 | 4.55412 | 2.08044 | 2.18902 | 0.0286   | NA       | 0       | 0       | 0       | 6.2203  | 4.2241  | 2.0108  | Up   |
| Taf4b    | 547.313 | 0.61747 | 0.13028 | 4.73949 | 2.14E-06 | 2.46E-05 | 394.741 | 458.048 | 443.066 | 641.727 | 651.568 | 694.732 | Up   |
| Kctd1    | 937.899 | 0.90639 | 0.12844 | 7.05688 | 1.70E-12 | 5.91E-11 | 631.778 | 710.07  | 615.899 | 1342.55 | 1186.97 | 1140.12 | Up   |
| A830021F | 7.64166 | 2.79435 | 1.28408 | 2.17615 | 0.02954  | 0.0908   | 3.87001 | 1.91652 | 0       | 24.8812 | 2.11205 | 13.0702 | Up   |
| Aqp4     | 1539.18 | 1.4974  | 0.28455 | 5.2623  | 1.42E-07 | 2.05E-06 | 614.363 | 1147.99 | 653.14  | 2633.26 | 1506.95 | 2679.39 | Up   |
| Gm7665   | 791.8   | 0.65478 | 0.10957 | 5.97619 | 2.28E-09 | 4.71E-08 | 607.591 | 633.409 | 604.441 | 1014.94 | 928.246 | 962.169 | Up   |
| Cdh2     | 323.899 | -1.4813 | 0.32088 | -4.6163 | 3.91E-06 | 4.24E-05 | 351.203 | 738.817 | 340.893 | 142.03  | 177.412 | 193.037 | Down |
| Gm15328  | 2.23579 | -4.5576 | 2.18815 | -2.0828 | 0.03727  | NA       | 0.9675  | 9.58259 | 2.86465 | 0       | 0       | 0       | Down |
| Dsc2     | 285.206 | -1.1683 | 0.40097 | -2.9138 | 0.00357  | 0.01634  | 284.445 | 668.865 | 231.082 | 163.801 | 127.779 | 235.264 | Down |
| Dsg1a    | 10.9223 | 3.37784 | 0.99789 | 3.38497 | 0.00071  | 0.00419  | 0       | 3.83303 | 1.90977 | 10.3672 | 24.2886 | 25.135  | Up   |
| Gm16090  | 138.235 | -0.6849 | 0.26219 | -2.6123 | 0.00899  | 0.03498  | 142.223 | 179.194 | 190.022 | 116.112 | 79.2019 | 122.659 | Down |
| Mep1b    | 4.27627 | 3.62899 | 1.52498 | 2.37969 | 0.01733  | 0.05958  | 0       | 1.91652 | 0       | 10.3672 | 6.33615 | 7.03781 | Up   |
| Dtna     | 2378.61 | -0.4491 | 0.1344  | -3.3417 | 0.00083  | 0.00477  | 2426.49 | 3200.58 | 2610.65 | 1930.36 | 2003.28 | 2100.28 | Down |
| Zscan30  | 502.828 | -0.4651 | 0.17553 | -2.6499 | 0.00805  | 0.03199  | 540.833 | 557.707 | 651.23  | 408.466 | 359.049 | 499.684 | Down |
| Ino80c   | 2352.8  | 0.32728 | 0.09381 | 3.48894 | 0.00048  | 0.00302  | 1970.8  | 2170.46 | 2119.84 | 2526.48 | 2718.21 | 2611.03 | Up   |
| Galnt1   | 7052.92 | 0.31482 | 0.07919 | 3.97562 | 7.02E-05 | 0.00056  | 6217.16 | 6326.42 | 6315.6  | 7481.98 | 8127.17 | 7849.16 | Up   |
| Gm38410  | 27.1281 | 0.98025 | 0.48257 | 2.03132 | 0.04222  | 0.11956  | 22.2525 | 20.1234 | 12.4135 | 36.2851 | 27.4567 | 44.2376 | Up   |
| Fhod3    | 217.889 | -2.878  | 0.36809 | -7.8187 | 5.34E-15 | 2.71E-13 | 292.185 | 609.453 | 249.224 | 53.9092 | 42.241  | 60.3241 | Down |
| Tpgs2    | 943.884 | -0.2604 | 0.10207 | -2.551  | 0.01074  | 0.04058  | 1064.25 | 1032.04 | 990.214 | 840.777 | 874.389 | 861.629 | Down |
| AW55491  | 1070.74 | -0.2812 | 0.10981 | -2.5612 | 0.01043  | 0.03959  | 1189.06 | 1229.45 | 1105.75 | 924.751 | 1024.34 | 951.109 | Down |
| Celf4    | 248.311 | 0.795   | 0.27352 | 2.90654 | 0.00365  | 0.01664  | 211.883 | 191.652 | 141.323 | 291.317 | 234.438 | 419.252 | Up   |
| Syt4     | 3.1939  | -5.0721 | 1.91524 | -2.6483 | 0.00809  | 0.03211  | 1.935   | 11.4991 | 5.7293  | 0       | 0       | 0       | Down |
| Wdr33    | 4501.11 | -0.2906 | 0.0963  | -3.0176 | 0.00255  | 0.01224  | 4677.87 | 4860.29 | 5320.61 | 3884.57 | 4046.69 | 4216.65 | Down |
| Lims2    | 6788.8  | -0.7429 | 0.0784  | -9.4752 | 2.66E-21 | 2.62E-19 | 8220.86 | 8762.32 | 8513.74 | 5215.72 | 4998.17 | 5021.98 | Down |
| Bin1     | 2321.89 | -0.3673 | 0.10567 | -3.476  | 0.00051  | 0.00315  | 2506.8  | 2459.85 | 2880.88 | 2055.81 | 2042.35 | 1985.67 | Down |
| Gypc     | 977.775 | -0.8705 | 0.14851 | -5.8613 | 4.59E-09 | 9.01E-08 | 1339.99 | 1384.68 | 1067.56 | 713.261 | 730.77  | 630.386 | Down |
| Stard4   | 2931.5  | 0.98655 | 0.13968 | 7.06313 | 1.63E-12 | 5.67E-11 | 2039.49 | 1960.6  | 1899.26 | 3645.09 | 4621.17 | 3423.39 | Up   |
| Nrep     | 2285.36 | -0.5535 | 0.18305 | -3.024  | 0.00249  | 0.01202  | 2199.13 | 2690.79 | 3265.7  | 1827.73 | 1568.2  | 2160.61 | Down |
| Apc      | 6469.6  | 0.59564 | 0.09421 | 6.32267 | 2.57E-10 | 6.35E-09 | 5147.11 | 4960.91 | 5350.21 | 7216.58 | 7929.69 | 8213.12 | Up   |
| Brd8dc   | 210.086 | -0.5321 | 0.2586  | -2.0578 | 0.03961  | 0.11363  | 189.63  | 229.024 | 326.57  | 150.324 | 167.908 | 197.059 | Down |
| Gfra3    | 12.9546 | -1.9075 | 0.9065  | -2.1043 | 0.03535  | 0.10407  | 12.5775 | 39.2886 | 9.54883 | 4.14686 | 2.11205 | 10.054  | Down |
| Cdc25c   | 22.1833 | 1.56386 | 0.52096 | 3.0019  | 0.00268  | 0.01278  | 13.545  | 9.58259 | 10.5037 | 37.3218 | 38.0169 | 24.1296 | Up   |
| Kdm3b    | 4012.11 | 0.24883 | 0.09054 | 2.74812 | 0.00599  | 0.02514  | 3880.65 | 3434.4  | 3685.85 | 4359.39 | 4437.42 | 4274.96 | Up   |
| Etf1     | 8694.85 | 0.20467 | 0.08259 | 2.47821 | 0.0132   | 0.04794  | 8330.19 | 7878.8  | 8028.66 | 9099.26 | 9039.58 | 9792.6  | Up   |
| Sil1     | 1556    | 0.20687 | 0.09548 | 2.16649 | 0.03027  | 0.09239  | 1514.14 | 1398.1  | 1421.82 | 1667.04 | 1614.66 | 1720.24 | Up   |
| 1700066B | 108.222 | 0.83595 | 0.29374 | 2.84586 | 0.00443  | 0.01956  | 64.8226 | 66.1198 | 102.172 | 114.039 | 158.404 | 143.772 | Up   |
| Sting1   | 3027.59 | 1.87617 | 0.11504 | 16.3082 | 8.63E-60 | 1.55E-56 | 1299.35 | 1331.98 | 1257.58 | 4485.87 | 5351.94 | 4438.84 | Up   |
| Cxxc5    | 941.258 | -0.7301 | 0.16676 | -4.3782 | 1.20E-05 | 0.00011  | 1070.06 | 1440.26 | 1013.13 | 744.362 | 677.968 | 701.77  | Down |
| Igip     | 3725.7  | -0.2419 | 0.111   | -2.1792 | 0.02931  | 0.09031  | 4484.37 | 3818.66 | 3809.03 | 3236.63 | 3416.24 | 3589.28 | Down |
| Cystm1   | 6690.86 | 0.6258  | 0.08092 | 7.73347 | 1.05E-14 | 5.03E-13 | 5169.36 | 5205.26 | 5411.32 | 8194.2  | 8392.23 | 7772.75 | Up   |
| Pfdn1    | 1648.79 | 0.2066  | 0.09895 | 2.08793 | 0.0368   | 0.10748  | 1479.31 | 1479.55 | 1633.8  | 1800.78 | 1793.13 | 1706.17 | Up   |
| Hbegf    | 2864.88 | 0.94929 | 0.18491 | 5.13385 | 2.84E-07 | 3.93E-06 | 1933.07 | 1727.74 | 2203.87 | 3154.73 | 4802.8  | 3367.09 | Up   |
| Cd14     | 6801.79 | 1.71631 | 0.12403 | 13.8383 | 1.50E-43 | 9.23E-41 | 2745.77 | 3599.22 | 3176.9  | 10273.9 | 10866.5 | 10148.5 | Up   |
| Dnd1     | 74.7268 | -0.6215 | 0.28878 | -2.1522 | 0.03138  | 0.0949   | 92.8801 | 76.6607 | 102.172 | 50.7991 | 66.5296 | 59.3187 | Down |
| Diaph1   | 10403.6 | 0.41525 | 0.11035 | 3.7629  | 0.00017  | 0.00     |         |         |         |         |         |         |      |

|          |         |         |         |         |          |          |         |         |         |         |         |         |      |
|----------|---------|---------|---------|---------|----------|----------|---------|---------|---------|---------|---------|---------|------|
| Spry4    | 1863.94 | 0.32984 | 0.12276 | 2.68683 | 0.00721  | 0.02922  | 1452.22 | 1800.57 | 1702.56 | 1946.95 | 2125.78 | 2155.58 | Up   |
| Arhgap26 | 208.744 | 0.37338 | 0.18719 | 1.99467 | 0.04608  | 0.128    | 202.208 | 170.57  | 172.834 | 257.106 | 237.606 | 212.14  | Up   |
| Gm41715  | 17.0097 | -1.9048 | 0.87024 | -2.1889 | 0.02861  | 0.08868  | 13.545  | 56.5373 | 10.5037 | 5.18358 | 4.2241  | 12.0648 | Down |
| Dcp2     | 2846.65 | 0.23723 | 0.10695 | 2.21804 | 0.02655  | 0.08357  | 2696.43 | 2494.35 | 2648.85 | 2868.59 | 2987.5  | 3384.18 | Up   |
| Mcc      | 4651.37 | -0.3031 | 0.10476 | -2.8934 | 0.00381  | 0.01726  | 5323.19 | 4653.3  | 5438.06 | 4027.64 | 4395.18 | 4070.87 | Down |
| Kcnn2    | 134.913 | -1.1611 | 0.337   | -3.4453 | 0.00057  | 0.00347  | 224.46  | 219.441 | 115.541 | 92.2677 | 61.2495 | 96.5185 | Down |
| Trim36   | 333.3   | 0.6667  | 0.15102 | 4.41465 | 1.01E-05 | 9.90E-05 | 253.485 | 240.523 | 278.826 | 388.768 | 434.026 | 404.171 | Up   |
| Ticam2   | 237.971 | 1.39179 | 0.21345 | 6.52034 | 7.01E-11 | 1.91E-09 | 153.833 | 137.989 | 102.172 | 337.969 | 380.169 | 315.696 | Up   |
| Eif1a    | 6097.63 | 0.40115 | 0.09338 | 4.29582 | 1.74E-05 | 0.00016  | 4965.22 | 5124.77 | 5675.82 | 6811.22 | 7140.84 | 6867.89 | Up   |
| Cdo1     | 11345   | -0.6085 | 0.09315 | -6.5321 | 6.48E-11 | 1.77E-09 | 14394.5 | 14138.1 | 12574.9 | 9132.43 | 9107.16 | 8722.86 | Down |
| Atg12    | 3453.81 | 0.24853 | 0.10099 | 2.46094 | 0.01386  | 0.04988  | 3280.8  | 3009.89 | 3180.71 | 3860.73 | 3440.53 | 3950.22 | Up   |
| Ap3s1    | 2675.57 | 0.28161 | 0.11517 | 2.4451  | 0.01448  | 0.0516   | 2271.69 | 2712.83 | 2261.16 | 3018.92 | 2992.78 | 2796.02 | Up   |
| Sema6a   | 2959.95 | -0.3213 | 0.12748 | -2.5204 | 0.01172  | 0.04355  | 3608.78 | 3041.51 | 3214.14 | 2472.57 | 2969.54 | 2453.18 | Down |
| 1700065C | 4.92645 | 3.84978 | 1.56082 | 2.46651 | 0.01364  | 0.04925  | 0       | 1.91652 | 0       | 11.4039 | 3.16808 | 13.0702 | Up   |
| Hsd17b4  | 7953.93 | 0.23024 | 0.09688 | 2.3765  | 0.01748  | 0.05996  | 7829.02 | 7465.79 | 6666.99 | 8756.1  | 8521.07 | 8484.58 | Up   |
| Snx2     | 7181.41 | 0.31442 | 0.09622 | 3.26782 | 0.00108  | 0.00597  | 6531.6  | 6462.5  | 6211.51 | 7738.05 | 8663.63 | 7481.19 | Up   |
| Snx24    | 1303.22 | 0.86834 | 0.15412 | 5.63411 | 1.76E-08 | 3.04E-07 | 990.722 | 927.594 | 848.891 | 1706.43 | 1944.14 | 1401.53 | Up   |
| Ppic     | 7215.77 | 0.77388 | 0.09153 | 8.45486 | 2.79E-17 | 1.94E-15 | 5661.82 | 4986.78 | 5328.25 | 9355.32 | 8766.07 | 9196.4  | Up   |
| Prdm6    | 1256.67 | -0.9651 | 0.18158 | -5.3152 | 1.07E-07 | 1.57E-06 | 1478.34 | 1653.95 | 1853.43 | 810.712 | 1052.86 | 690.71  | Down |
| Aldh7a1  | 3463.11 | -0.2559 | 0.09638 | -2.6547 | 0.00794  | 0.03162  | 3801.31 | 3775.54 | 3731.68 | 3176.5  | 2911.46 | 3382.17 | Down |
| Lmnb1    | 1139.28 | 0.2904  | 0.13177 | 2.2039  | 0.02753  | 0.08594  | 1086.5  | 1007.13 | 981.62  | 1202.59 | 1134.17 | 1423.65 | Up   |
| 4930511M | 11.518  | -1.7984 | 0.73319 | -2.4529 | 0.01417  | 0.05078  | 11.61   | 21.0817 | 21.0074 | 4.14686 | 4.2241  | 7.03781 | Down |
| Gm19519  | 26.4389 | 1.41817 | 0.51539 | 2.75164 | 0.00593  | 0.02494  | 12.5775 | 19.1652 | 11.4586 | 24.8812 | 43.297  | 47.2538 | Up   |
| Slc12a2  | 6529.35 | -0.3929 | 0.1495  | -2.6283 | 0.00858  | 0.03368  | 5993.67 | 8449.92 | 7795.66 | 5484.23 | 5328.7  | 6123.9  | Down |
| Slc27a6  | 266.087 | 0.83578 | 0.31183 | 2.68026 | 0.00736  | 0.02972  | 282.51  | 139.906 | 150.871 | 302.721 | 432.97  | 287.545 | Up   |
| Adamts19 | 51.8428 | -3.4053 | 0.58353 | -5.8356 | 5.36E-09 | 1.03E-07 | 79.3351 | 158.113 | 46.7893 | 12.4406 | 6.33615 | 8.04321 | Down |
| Chsy3    | 434.834 | 0.65712 | 0.2468  | 2.66256 | 0.00775  | 0.03102  | 343.463 | 437.924 | 231.082 | 615.809 | 470.987 | 509.738 | Up   |
| Gm4951   | 302.934 | 1.85056 | 0.41179 | 4.49394 | 6.99E-06 | 7.16E-05 | 212.85  | 88.1598 | 93.5785 | 328.639 | 744.498 | 349.88  | Up   |
| Gm4841   | 43.2834 | 2.40175 | 0.44003 | 5.45811 | 4.81E-08 | 7.66E-07 | 19.35   | 13.4156 | 8.59395 | 79.8271 | 58.0814 | 80.4321 | Up   |
| Igfp1    | 1779.25 | 1.43203 | 0.23964 | 5.97566 | 2.29E-09 | 4.71E-08 | 1237.43 | 848.059 | 801.147 | 1912.74 | 3388.79 | 2487.36 | Up   |
| BC023105 | 62.3377 | 2.6502  | 0.43028 | 4.79928 | 1.59E-06 | 1.88E-05 | 39.6676 | 17.2487 | 15.2781 | 89.1576 | 95.0423 | 117.632 | Up   |
| Synpo    | 5074.76 | -0.3597 | 0.17747 | -2.0269 | 0.04267  | 0.12052  | 4301.51 | 5751.47 | 7059.45 | 4268.16 | 4452.2  | 4615.8  | Down |
| Cd74     | 97993.1 | 1.53009 | 0.15473 | 9.88893 | 4.65E-23 | 5.25E-21 | 61620.2 | 44976.8 | 44625.5 | 152627  | 153380  | 130728  | Up   |
| Camk2a   | 128.876 | -0.9562 | 0.2941  | -3.2513 | 0.00115  | 0.00628  | 196.403 | 201.234 | 112.676 | 85.0107 | 83.426  | 94.5077 | Down |
| Slc6a7   | 21.9963 | -1.4663 | 0.58134 | -2.5223 | 0.01166  | 0.04337  | 22.2525 | 50.7877 | 23.8721 | 12.4406 | 10.5603 | 12.0648 | Down |
| Pdgfrb   | 5593.45 | -0.4567 | 0.17262 | -2.6455 | 0.00816  | 0.03233  | 5577.65 | 6506.58 | 7329.68 | 4196.63 | 5825.04 | 4125.16 | Down |
| Hmgxb3   | 1428.53 | 0.37146 | 0.12596 | 2.94901 | 0.00319  | 0.01485  | 1349.66 | 1147.04 | 1240.39 | 1492.87 | 1557.64 | 1783.58 | Up   |
| Arhgef37 | 158.275 | -0.734  | 0.33139 | -2.215  | 0.02676  | 0.08406  | 143.19  | 298.977 | 150.871 | 131.663 | 120.387 | 104.562 | Down |
| Bvht     | 1567.06 | -0.4825 | 0.18623 | -2.5909 | 0.00957  | 0.03684  | 1904.04 | 1821.65 | 1754.12 | 1200.52 | 1686.47 | 1035.56 | Down |
| Grpel2   | 3447.92 | 0.23733 | 0.09614 | 2.46867 | 0.01356  | 0.04903  | 3339.82 | 3013.72 | 3141.56 | 3699    | 3547.19 | 3946.2  | Up   |
| Ablim3   | 4286.88 | -0.4681 | 0.10629 | -4.4037 | 1.06E-05 | 0.0001   | 4878.14 | 4663.84 | 5386.49 | 3505.14 | 3869.28 | 3418.36 | Down |
| Adrb2    | 4366.66 | -0.5068 | 0.16446 | -3.0815 | 0.00206  | 0.01021  | 5266.11 | 5115.18 | 4995.95 | 4452.69 | 3498.61 | 2871.42 | Down |
| Apccdd1  | 402.248 | -0.451  | 0.1802  | -2.5029 | 0.01232  | 0.04535  | 530.191 | 386.178 | 477.441 | 377.365 | 332.648 | 309.663 | Down |
| Wdr7     | 1668.04 | 0.43709 | 0.10642 | 4.10731 | 4.00E-05 | 0.00034  | 1515.11 | 1345.4  | 1391.26 | 1833.95 | 2043.41 | 1879.09 | Up   |
| Amd-ps3  | 90.6965 | 0.80863 | 0.26203 | 3.08597 | 0.00203  | 0.01009  | 69.6601 | 54.6207 | 73.526  | 114.039 | 106.659 | 125.675 | Up   |
| Alpk2    | 248.514 | 2.40954 | 0.39928 | 6.03468 | 1.59E-09 | 3.38E-08 | 61.9201 | 137.989 | 36.2855 | 425.053 | 385.449 | 444.387 | Up   |
| Malt1    | 5425.29 | 2.53169 | 0.15217 | 16.6376 | 3.72E-62 | 8.03E-59 | 1889.53 | 1490.09 | 1419.91 | 8318.61 | 8918.13 | 10515.5 | Up   |
| Gm41760  | 31.7178 | -0.8358 | 0.41738 | -2.0026 | 0.04522  | 0.12605  | 37.7326 | 43.1216 | 41.06   | 23.8445 | 27.4567 | 17.0918 | Down |
| Oacyl    | 35.3794 | 1.05264 | 0.43624 | 2.41298 | 0.01582  | 0.05541  | 14.5125 | 29.706  | 24.827  | 41.4686 | 46.4651 | 55.297  | Up   |
| Sec11c   | 4419.11 | 0.8842  | 0.08711 | 10.1507 | 3.29E-24 | 4.05E-22 | 3055.37 | 3173.75 | 3088.09 | 6054.42 | 5686.7  | 5456.31 | Up   |
| Gm15958  | 27.8865 | -1.0338 | 0.45273 | -2.2834 | 0.02241  | 0.0729   | 37.7326 | 40.2469 | 34.3758 | 18.6609 | 23.2326 | 13.0702 | Down |
| Gm9926   | 59.3489 | 7.52567 | 1.11243 | 6.7651  | 1.33E-11 | 4.10E-10 | 1.935   | 0       | 0       | 172.095 | 106.659 | 75.4051 | Up   |
| Gm50162  | 1.8822  | 4.41447 | 2.21576 | 1.99231 | 0.04634  | NA       | 0       | 0       | 0       | 1.03672 | 4.2241  | 6.03241 | Up   |
| Impa2    | 371.431 | 0.74647 | 0.22318 | 3.34471 | 0.00082  | 0.00473  | 327.015 | 296.102 | 209.119 | 466.522 | 541.741 | 388.085 | Up   |
| Psmg2    | 1316.94 | -0.2422 | 0.09748 | -2.4845 | 0.01297  | 0.04727  | 1355.47 | 1450.8  | 1475.29 | 1232.66 | 1208.09 | 1179.34 | Down |
| Ptpn2    | 2293.53 | 0.33828 | 0.10111 | 3.34578 | 0.00082  | 0.00471  | 1916.62 | 2091.88 | 2069.23 | 2618.74 | 2380.28 | 2684.42 | Up   |
| Ldlrad4  | 2191.43 | 0.42321 | 0.10148 | 4.17053 | 3.04E-05 | 0.00026  | 1896.3  | 1967.31 | 1753.16 | 2409.33 | 2662.24 | 2460.22 | Up   |
| Tcf4     | 6770.98 | -0.2815 | 0.08419 | -3.344  | 0.00083  | 0.00474  | 7465.24 | 7254.02 | 7569.36 | 5763.1  | 6325.59 | 6248.57 | Down |
| 4930448D | 32.7376 | -1.0488 | 0.47472 | -2.2092 | 0.02716  | 0.08503  | 37.7326 | 41.2051 | 53.4734 | 32.1382 | 14.7844 | 17.0918 | Down |
| Rab27b   | 1825.2  | 0.56453 | 0.14722 | 3.83449 | 0.00013  | 0.00093  | 1245.17 | 1490.09 | 1682.5  | 2000.86 | 2143.73 | 2388.83 | Up   |
| Gm45879  | 2.88119 | 3.98624 | 1.8166  | 2.19434 | 0.02821  | 0.08773  | 0       | 0       | 0.95488 | 3.11015 | 3.16808 | 10.054  | Up   |
| Mex3c    | 3867.28 | 0.22547 | 0.09835 | 2.29259 | 0.02187  | 0.07154  | 3542.99 | 3298.33 | 3855.82 | 4211.14 | 4065.7  | 4229.72 | Up   |
| Ska1     | 35.8628 | 1.35508 | 0.41249 | 3.2851  | 0.00102  | 0.00567  | 17.415  | 26.8312 | 16.233  | 54.9459 | 46.4651 | 53.2862 | Up   |
| Myo5b    | 4682.23 | 0.55058 | 0.10321 | 5.33446 | 9.58E-08 | 1.42E-06 | 4087.69 | 3879.03 | 3431.85 | 5413.73 | 5547.3  | 5733.8  | Up   |
| Acaa2    | 8578.89 | -0.624  | 0.17746 | -3.5162 | 0.00044  | 0.00276  | 10825.4 | 12571.4 | 7820.49 | 7364.83 | 6606.49 | 6284.76 | Down |
| Lipg     | 2414.95 | -0.5242 | 0.11875 | -4.4142 | 1.01E-05 | 9.92E-05 | 2499.06 | 3053.01 | 2994.51 | 2002.94 | 2056.08 | 1884.12 | Down |
| 9030625G | 4.33925 | -3.5199 | 1.68778 | -2.0855 | 0.03702  | 0.10795  | 2.9025  | 3.83303 | 17.1879 | 0       | 2.11205 | 0       | Down |
| Rpl17    | 12201.1 | -0.216  | 0.10912 | -1.9793 | 0.04778  | 0.13179  | 13269.3 | 11752.1 | 14316.6 | 11803   | 11364.9 | 10700.5 | Down |
| Dym      | 3282.09 | 0.32342 | 0.11117 | 2.9092  | 0.00362  | 0.01654  | 3099.87 | 2987.85 | 2659.35 | 3757.06 | 3833.37 | 3355.02 | Up   |
| 2010010A | 2.70518 | 3.89014 | 1.87486 | 2.0749  | 0.038    | 0.11008  | 0       | 0       | 0.95488 | 3.11015 | 2.11205 | 10.054  | Up   |
| Smad7    | 3708.72 | -0.4105 | 0.16127 | -2.5456 | 0.01091  | 0.04106  | 3905.8  | 4061.1  | 4731.44 | 3545.57 | 3483.83 | 2524.56 | Down |
| Zbtb7c   | 303.887 | -0.5411 | 0.19371 | -2.7934 | 0.00522  | 0.02247  | 387.968 | 405.343 | 287.42  | 257.106 | 228.101 | 257.383 | Down |
| Smad2    | 3495.89 | 0.35791 | 0.10988 | 3.25726 | 0.00112  | 0.00617  | 3403.67 | 2822.07 | 2967.78 | 4013.13 | 3753.11 | 4015.57 | Up   |
| Gm7276   | 4.31634 | -5.5065 | 1.66418 | -3.3088 | 0.00094  | 0.00528  | 5.80501 | 11.4991 | 8.59395 | 0       | 0       | 0       | Down |
| St8sia5  | 12.6199 | -1.9763 | 0.85823 | -2.3028 | 0.02129  | 0.07003  | 11.61   | 32.5808 | 16.233  | 2.07343 | 3.16808 | 10.054  | Down |
| Haus1    | 513.203 | -0.6233 | 0.1263  | -4.9351 | 8.01E-07 | 1.01E-05 | 585.338 | 620.952 | 660.779 | 409.503 | 405.514 | 397.133 | Down |
| Atp5a1   | 32285.9 | -0.3605 | 0.16192 | -2.2267 | 0.02597  | 0.0821   | 33647.8 | 45487.6 | 29762.7 | 28729.5 | 28561.3 |         |      |

|          |         |         |         |         |          |          |         |         |         |         |         |         |      |
|----------|---------|---------|---------|---------|----------|----------|---------|---------|---------|---------|---------|---------|------|
| D330025C | 11.8578 | -5.0626 | 1.32841 | -3.8111 | 0.00014  | 0.00101  | 13.545  | 41.2051 | 14.3232 | 2.07343 | 0       | 0       | Down |
| Sall3    | 2.87253 | -4.919  | 2.46188 | -1.9981 | 0.04571  | 0.12713  | 0       | 13.4156 | 3.81953 | 0       | 0       | 0       | Down |
| Mbp      | 3906.42 | 0.67489 | 0.12077 | 5.58832 | 2.29E-08 | 3.86E-07 | 3441.4  | 2888.19 | 2697.54 | 4662.11 | 4863    | 4886.25 | Up   |
| Gm41793  | 8.61284 | -1.8333 | 0.84979 | -2.1574 | 0.03098  | 0.09399  | 18.3825 | 7.66607 | 14.3232 | 3.11015 | 3.16808 | 5.027   | Down |
| Zfp516   | 1742.11 | 0.23726 | 0.11656 | 2.03553 | 0.0418   | 0.11864  | 1667.01 | 1548.55 | 1582.24 | 1798.7  | 1749.83 | 2106.31 | Up   |
| 4933401U | 39.1089 | 1.12094 | 0.38801 | 2.88897 | 0.00387  | 0.01746  | 24.1875 | 23.9565 | 25.7818 | 41.4686 | 54.9133 | 64.3457 | Up   |
| Zadh2    | 3407.98 | 0.24295 | 0.11044 | 2.19981 | 0.02782  | 0.08672  | 3413.35 | 3031.93 | 2920.03 | 3458.48 | 3672.86 | 3951.23 | Up   |
| Cndp2    | 6751.23 | 0.89374 | 0.12892 | 6.93235 | 4.14E-12 | 1.35E-10 | 5457.68 | 4479.86 | 4235.86 | 8757.14 | 9362.72 | 8214.13 | Up   |
| Socs6    | 2069.21 | 0.25477 | 0.10649 | 2.3925  | 0.01673  | 0.05801  | 1763.76 | 2021.93 | 1875.39 | 2191.62 | 2161.68 | 2400.9  | Up   |
| Cd226    | 384.091 | -0.5256 | 0.19004 | -2.7656 | 0.00568  | 0.02411  | 376.358 | 550.999 | 432.562 | 299.611 | 305.191 | 339.825 | Down |
| Tmx3     | 7251.97 | 0.27517 | 0.07841 | 3.50915 | 0.00045  | 0.00283  | 6391.31 | 6570.78 | 6725.24 | 7685.17 | 8192.64 | 7946.69 | Up   |
| Gm45871  | 746.937 | 0.71841 | 0.20477 | 3.50836 | 0.00045  | 0.00284  | 523.418 | 596.037 | 574.84  | 897.796 | 700.145 | 1189.39 | Down |
| Kmt5b    | 131.979 | 0.52556 | 0.24987 | 2.1033  | 0.03544  | 0.10424  | 122.873 | 82.4102 | 119.36  | 168.985 | 139.395 | 158.853 | Up   |
| Tcirg1   | 6309.69 | 0.74657 | 0.10235 | 7.29455 | 3.00E-13 | 1.17E-11 | 4815.25 | 4562.27 | 4760.09 | 8195.24 | 8408.07 | 7117.23 | Up   |
| Unc93b1  | 5944.64 | 0.56486 | 0.09836 | 5.74272 | 9.32E-09 | 1.71E-07 | 5061    | 4925.45 | 4400.1  | 7013.38 | 7430.19 | 6837.73 | Up   |
| Aldh3b3  | 6.12149 | -2.976  | 1.23768 | -2.4045 | 0.01619  | 0.05647  | 2.9025  | 20.1234 | 9.54883 | 1.03672 | 2.11205 | 1.0054  | Down |
| Aldh3b2  | 28.2678 | -1.647  | 0.51484 | -3.199  | 0.00138  | 0.00731  | 38.7001 | 51.746  | 38.1953 | 11.4039 | 8.4482  | 21.1134 | Down |
| Doc2g    | 378.821 | -2.3984 | 0.67569 | -3.5495 | 0.00039  | 0.00247  | 300.893 | 1273.53 | 336.119 | 118.186 | 123.555 | 120.648 | Down |
| Ndufv1   | 5297.59 | -0.5569 | 0.15103 | -3.6875 | 0.00023  | 0.00155  | 5514.76 | 7721.65 | 5686.33 | 4470.32 | 4118.5  | 4273.96 | Down |
| Gstp1    | 6481.83 | -0.4949 | 0.08847 | -5.5941 | 2.22E-08 | 3.74E-07 | 7919.97 | 7326.85 | 7501.56 | 5694.68 | 5238.94 | 5208.98 | Down |
| Gstp2    | 213.626 | -0.4677 | 0.22341 | -2.0936 | 0.03629  | 0.10628  | 313.47  | 206.984 | 223.443 | 170.021 | 185.86  | 181.978 | Down |
| Gstp3    | 492.512 | 1.10674 | 0.2237  | 4.9475  | 7.52E-07 | 9.58E-06 | 301.86  | 351.681 | 283.6   | 781.684 | 474.155 | 762.094 | Up   |
| Pitpnm1  | 3057.57 | 0.37711 | 0.11099 | 3.39773 | 0.00068  | 0.00403  | 2783.5  | 2577.72 | 2619.24 | 3421.16 | 3806.97 | 3136.85 | Up   |
| Coro1b   | 6220.73 | 0.7364  | 0.14234 | 5.17366 | 2.30E-07 | 3.21E-06 | 5340.61 | 4209.63 | 4449.75 | 7749.45 | 8751.28 | 6823.66 | Up   |
| Carns1   | 350.034 | -0.6234 | 0.26069 | -2.3915 | 0.01678  | 0.05812  | 408.286 | 565.373 | 299.833 | 230.151 | 322.088 | 274.474 | Down |
| Ppp1ca   | 9989.27 | 0.27819 | 0.10674 | 2.60614 | 0.00916  | 0.03549  | 9964.3  | 8442.26 | 8680.84 | 11160.2 | 11418.8 | 10269.2 | Up   |
| Ssh3     | 3872.09 | 0.59517 | 0.09551 | 6.23139 | 4.62E-10 | 1.08E-08 | 3241.13 | 2853.69 | 3158.75 | 4838.35 | 4603.21 | 4537.37 | Up   |
| Grk2     | 6983.14 | 0.23006 | 0.11156 | 2.06223 | 0.03919  | 0.1127   | 7064.7  | 5967.08 | 6250.66 | 7668.59 | 8001.5  | 6946.31 | Up   |
| Rhod     | 627.271 | 0.36025 | 0.16094 | 2.23846 | 0.02519  | 0.08019  | 476.978 | 622.868 | 548.103 | 779.61  | 710.705 | 625.359 | Up   |
| A930001C | 60.8087 | 2.20022 | 0.42575 | 5.1679  | 2.37E-07 | 3.31E-06 | 16.4475 | 19.1652 | 29.6014 | 85.0107 | 72.8658 | 141.762 | Up   |
| Syt12    | 149.522 | 2.039   | 0.30304 | 6.72854 | 1.71E-11 | 5.18E-10 | 44.5051 | 63.2451 | 67.7967 | 166.911 | 267.239 | 267.437 | Up   |
| Pcx      | 5297.98 | 0.92269 | 0.15849 | 5.8216  | 5.83E-09 | 1.11E-07 | 3294.34 | 4465.49 | 3217.96 | 6165.35 | 7341.49 | 7303.23 | Up   |
| Sptbn2   | 161.919 | -0.5945 | 0.27317 | -2.1762 | 0.02954  | 0.0908   | 181.89  | 183.027 | 219.623 | 158.618 | 86.5941 | 141.762 | Down |
| Gm21992  | 1484.39 | -0.2863 | 0.11375 | -2.5171 | 0.01183  | 0.04387  | 1548    | 1551.42 | 1794.22 | 1275.16 | 1337.98 | 1399.52 | Down |
| Dpp3     | 2942.69 | 0.57813 | 0.08489 | 6.81048 | 9.73E-12 | 3.05E-10 | 2471    | 2298.86 | 2312.73 | 3589.11 | 3479.6  | 3504.83 | Up   |
| Peli3    | 451.571 | 0.8118  | 0.20666 | 3.92821 | 8.56E-05 | 0.00066  | 347.333 | 321.975 | 314.156 | 615.809 | 423.466 | 686.689 | Up   |
| Npas4    | 23.5131 | -2.0248 | 0.5373  | -3.7685 | 0.00016  | 0.00118  | 33.8626 | 43.1216 | 36.2855 | 5.18358 | 10.5603 | 12.0648 | Down |
| Slc29a2  | 123.96  | -1.0638 | 0.24797 | -4.29   | 1.79E-05 | 0.00016  | 155.768 | 187.819 | 159.465 | 64.2764 | 93.9863 | 82.4429 | Down |
| Rin1     | 517.962 | 0.61299 | 0.16218 | 3.77969 | 0.00016  | 0.00113  | 374.423 | 392.886 | 461.208 | 568.12  | 714.929 | 596.203 | Up   |
| Cd248    | 321.234 | -1.0132 | 0.21029 | -4.8178 | 1.45E-06 | 1.73E-05 | 342.496 | 531.834 | 414.419 | 206.306 | 231.27  | 201.08  | Down |
| Tmem151  | 553.544 | 0.7627  | 0.32753 | 2.32865 | 0.01988  | 0.0665   | 637.583 | 295.144 | 298.878 | 807.602 | 800.467 | 481.587 | Up   |
| Rab1b    | 9422.17 | 0.44116 | 0.11599 | 3.80354 | 0.00014  | 0.00104  | 8655.27 | 8047.46 | 7275.25 | 10862.7 | 11803.2 | 9889.12 | Up   |
| Klc2     | 1823.85 | 0.28202 | 0.10384 | 2.71594 | 0.00661  | 0.02718  | 1579.93 | 1667.37 | 1691.1  | 2168.81 | 1914.57 | 1921.32 | Up   |
| D330050I | 42.618  | -0.8399 | 0.42821 | -1.9614 | 0.04984  | 0.13647  | 41.6026 | 73.7859 | 48.699  | 37.3218 | 21.1205 | 33.1782 | Down |
| Ctsw     | 263.129 | -0.556  | 0.17715 | -3.1387 | 0.0017   | 0.00868  | 271.868 | 347.848 | 319.886 | 200.086 | 224.933 | 214.15  | Down |
| Efemp2   | 3042.89 | 0.30725 | 0.08989 | 3.41794 | 0.00063  | 0.00378  | 2689.65 | 2675.46 | 2794.94 | 3396.28 | 3523.96 | 3177.07 | Up   |
| Ap5b1    | 289.739 | 0.87005 | 0.19929 | 4.36585 | 1.27E-05 | 0.00012  | 226.395 | 178.236 | 210.074 | 344.19  | 447.755 | 331.782 | Up   |
| Sipa1    | 4771.32 | -0.3239 | 0.13788 | -2.3493 | 0.01881  | 0.06369  | 5084.22 | 4709.84 | 6119.84 | 4139.61 | 4684.53 | 3889.9  | Down |
| Ltbp3    | 6194.97 | -0.2511 | 0.09511 | -2.6402 | 0.00829  | 0.03275  | 6817.98 | 6375.29 | 7005.02 | 6047.16 | 5362.5  | 5561.88 | Down |
| Scyl1    | 4996.48 | 0.28906 | 0.11081 | 2.60862 | 0.00909  | 0.03529  | 4828.8  | 4121.47 | 4542.38 | 5813.9  | 5641.29 | 5031.03 | Up   |
| Neat1    | 131154  | 0.31483 | 0.12192 | 2.58227 | 0.00982  | 0.03762  | 100430  | 123707  | 126563  | 135696  | 152439  | 148090  | Up   |
| Frmd8os  | 16.4006 | -2.0053 | 0.61544 | -3.2584 | 0.00112  | 0.00614  | 28.0575 | 31.6225 | 19.0977 | 7.25701 | 6.33615 | 6.03241 | Down |
| Frmd8    | 3027.29 | 0.20839 | 0.09744 | 2.13861 | 0.03247  | 0.09725  | 2953.78 | 2650.54 | 2822.63 | 3669.64 | 3044.63 | 3065.47 | Up   |
| Slc25a45 | 1543.05 | 0.61428 | 0.11906 | 5.1592  | 2.48E-07 | 3.46E-06 | 1224.86 | 1155.66 | 1277.63 | 1710.58 | 2069.81 | 1819.78 | Up   |
| Cdc42ep2 | 1633.84 | -0.486  | 0.14277 | -3.404  | 0.00066  | 0.00395  | 1960.16 | 1593.58 | 2165.67 | 1350.84 | 1302.08 | 1430.69 | Down |
| Capn1    | 3738.91 | 0.60121 | 0.14797 | 4.06309 | 4.84E-05 | 0.0004   | 3514.93 | 2678.33 | 2719.51 | 4620.64 | 4891.51 | 4008.53 | Up   |
| Tm7sf2   | 1320.68 | 1.37764 | 0.11097 | 12.4143 | 2.18E-35 | 7.03E-33 | 751.749 | 780.981 | 669.373 | 1853.65 | 1983.22 | 1885.13 | Up   |
| Cdca5    | 66.1793 | 1.32683 | 0.34797 | 3.81309 | 0.00014  | 0.001    | 28.0575 | 43.1216 | 42.0148 | 80.8638 | 82.37   | 120.648 | Up   |
| Map4k2   | 6629.81 | -0.481  | 0.12359 | -3.8917 | 9.95E-05 | 0.00076  | 6919.57 | 7329.72 | 8925.29 | 5358.78 | 5580.04 | 5665.43 | Down |
| Gm14966  | 252.719 | -0.5801 | 0.22569 | -2.5705 | 0.01015  | 0.0387   | 230.265 | 339.224 | 338.983 | 181.425 | 233.382 | 193.037 | Down |
| Pygm     | 2507.85 | -2.1325 | 0.3033  | -7.0311 | 2.05E-12 | 7.03E-11 | 2719.65 | 6636.9  | 2896.16 | 971.403 | 989.496 | 833.477 | Down |
| Rasgrp2  | 2464.34 | -0.7728 | 0.13856 | -5.5774 | 2.44E-08 | 4.09E-07 | 2838.65 | 2902.57 | 3585.59 | 1913.78 | 1917.74 | 1627.74 | Down |
| Nrxn2    | 502.77  | -1.3274 | 0.20533 | -6.4648 | 1.01E-10 | 2.69E-09 | 673.381 | 683.238 | 800.192 | 330.712 | 319.976 | 209.123 | Down |
| Rps6ka4  | 1655.83 | 0.54354 | 0.1937  | 2.80613 | 0.00501  | 0.02177  | 1671.84 | 1022.46 | 1348.29 | 2050.62 | 2141.62 | 1700.13 | Up   |
| Ccdc88b  | 686.112 | 0.82585 | 0.18728 | 4.40962 | 1.04E-05 | 0.0001   | 606.623 | 436.966 | 441.156 | 852.18  | 1010.62 | 769.132 | Up   |
| Esrra    | 2102.62 | 0.53107 | 0.13622 | 3.89858 | 9.68E-05 | 0.00074  | 1714.41 | 1909.81 | 1535.45 | 2390.67 | 2793.19 | 2272.21 | Up   |
| Kcnk4    | 67.2856 | -1.0207 | 0.43496 | -2.3466 | 0.01895  | 0.06402  | 68.6926 | 100.617 | 101.218 | 48.7256 | 21.1205 | 63.3403 | Down |
| Trpt1    | 557.092 | -0.4505 | 0.20324 | -2.2164 | 0.02666  | 0.08381  | 545.671 | 720.611 | 663.644 | 565.01  | 483.66  | 363.955 | Down |
| Fermt3   | 1793.19 | 0.51577 | 0.17317 | 2.97847 | 0.0029   | 0.01365  | 1566.38 | 1549.5  | 1312.01 | 2027.82 | 2586.21 | 1717.22 | Up   |
| Macrodl  | 1239.93 | -0.783  | 0.17728 | -4.4166 | 1.00E-05 | 9.83E-05 | 1339.02 | 1957.72 | 1408.45 | 957.925 | 816.308 | 960.158 | Down |
| Mark2    | 4211.18 | 0.45581 | 0.10678 | 4.26879 | 1.97E-05 | 0.00018  | 3839.05 | 3281.08 | 3534.02 | 4806.21 | 5201.98 | 4604.74 | Up   |
| 2700081C | 1851.85 | -0.3715 | 0.10664 | -3.4842 | 0.00049  | 0.00307  | 2049.17 | 1980.72 | 2237.29 | 1616.24 | 1517.51 | 1710.19 | Down |
| Ati3     | 7637.99 | 0.29399 | 0.09221 | 3.18831 | 0.00143  | 0.00753  | 7216.59 | 6383.92 | 6986.88 | 8051.14 | 8621.39 | 8568.03 | Up   |
| Lgals12  | 387.24  | -0.8432 | 0.34455 | -2.4472 | 0.0144   | 0.05137  | 432.473 | 688.988 | 370.495 | 361.814 | 149.956 | 319.717 | Down |
| Wdr74    | 1258.43 | -0.2459 | 0.11485 | -2.1414 | 0.03224  | 0.09675  | 1299.35 | 1322.4  | 1474.34 | 1188.08 | 1200.7  | 1065.72 | Down |
| Taf6l    | 414.059 | 0.5634  | 0.16667 | 3.38031 | 0.00072  | 0.00425  | 346.366 | 313.351 | 342.803 | 503.844 | 560.749 | 417.241 | Up   |
| Ttc9c    | 2290.81 | 0.29212 | 0.08732 | 3.34525 | 0.00082  | 0.00472  | 2111.09 |         |         |         |         |         |      |

|           |         |         |         |         |          |          |         |         |         |         |         |         |      |
|-----------|---------|---------|---------|---------|----------|----------|---------|---------|---------|---------|---------|---------|------|
| Asrgl1    | 936.066 | -0.3797 | 0.15367 | -2.471  | 0.01347  | 0.04876  | 1145.52 | 1138.41 | 891.861 | 738.142 | 803.635 | 898.828 | Down |
| Stxbp3-ps | 127.054 | 0.52717 | 0.23568 | 2.23676 | 0.0253   | 0.08045  | 125.775 | 99.6589 | 86.8943 | 152.397 | 146.788 | 150.81  | Up   |
| Gm29231   | 25.3368 | 4.9392  | 0.82547 | 5.98348 | 2.18E-09 | 4.50E-08 | 0.9675  | 2.87478 | 0.95488 | 32.1382 | 51.7452 | 63.3403 | Up   |
| Gm50321   | 138.915 | -1.3728 | 0.37966 | -3.6158 | 0.0003   | 0.00198  | 190.598 | 303.768 | 106.947 | 68.4232 | 81.314  | 82.4429 | Down |
| Incenp    | 649.123 | 1.02741 | 0.16353 | 6.28252 | 3.33E-10 | 8.02E-09 | 511.808 | 411.093 | 359.036 | 908.163 | 849.044 | 855.596 | Up   |
| Fth1      | 145261  | 0.5598  | 0.14411 | 3.88447 | 0.0001   | 0.00078  | 131241  | 115392  | 105648  | 172660  | 199106  | 147519  | Up   |
| Best1     | 438.992 | 0.67894 | 0.21377 | 3.17598 | 0.00149  | 0.00781  | 325.08  | 322.933 | 364.765 | 407.429 | 529.069 | 684.678 | Up   |
| Rab3il1   | 960.619 | 1.15404 | 0.1774  | 6.50548 | 7.74E-11 | 2.09E-09 | 666.609 | 660.24  | 460.254 | 1217.1  | 1293.63 | 1465.87 | Up   |
| Fads3     | 10964.7 | 0.35912 | 0.11052 | 3.24939 | 0.00116  | 0.0063   | 10595.1 | 8930.01 | 9295.78 | 12730.9 | 12878.2 | 11358   | Up   |
| Fads2     | 4973.91 | 1.44552 | 0.12531 | 11.5359 | 8.69E-31 | 1.82E-28 | 3058.27 | 2618.92 | 2337.55 | 7003.02 | 7572.76 | 7252.96 | Up   |
| Fads1     | 13891   | 1.08394 | 0.08672 | 12.499  | 7.56E-36 | 2.55E-33 | 8963.9  | 9158.08 | 8592.99 | 17829.4 | 19923   | 18878.4 | Up   |
| Myrf      | 2812.79 | 0.39569 | 0.12199 | 3.24355 | 0.00118  | 0.00641  | 2517.44 | 2205.91 | 2564.82 | 3147.47 | 3533.46 | 2907.62 | Up   |
| Dagla     | 983.434 | 0.4287  | 0.12328 | 3.47756 | 0.00051  | 0.00313  | 871.719 | 816.436 | 826.929 | 1250.28 | 1106.71 | 1028.53 | Up   |
| Syt7      | 2671.97 | 1.19549 | 0.1473  | 8.11592 | 4.82E-16 | 2.83E-14 | 1863.41 | 1446.97 | 1562.19 | 3299.87 | 4218.82 | 3640.56 | Up   |
| Lrrc10b   | 2395.77 | -0.5714 | 0.18657 | -3.0624 | 0.0022   | 0.01076  | 2671.27 | 3240.83 | 2680.36 | 2132.52 | 1426.69 | 2222.94 | Down |
| Cyb561a3  | 1174.71 | 1.24631 | 0.21432 | 5.81522 | 6.06E-09 | 1.15E-07 | 914.289 | 619.993 | 555.742 | 1582.03 | 1951.53 | 1424.65 | Up   |
| Tkfc      | 393.078 | 0.86874 | 0.1451  | 5.98727 | 2.13E-09 | 4.40E-08 | 281.543 | 289.394 | 263.548 | 477.926 | 554.413 | 491.641 | Up   |
| Slc15a3   | 1161.94 | 1.92064 | 0.30474 | 6.30253 | 2.93E-10 | 7.15E-09 | 745.944 | 371.804 | 338.983 | 1768.64 | 2351.77 | 1394.49 | Up   |
| Tmem132   | 624.026 | 0.44519 | 0.13817 | 3.22215 | 0.00127  | 0.00684  | 528.256 | 555.79  | 501.314 | 767.17  | 758.226 | 633.403 | Up   |
| Tmem109   | 6733.26 | -0.5619 | 0.12551 | -4.4772 | 7.56E-06 | 7.68E-05 | 7607.46 | 8002.42 | 8474.59 | 5739.26 | 5935.92 | 4639.93 | Down |
| Prpf19    | 4925.2  | -0.2027 | 0.08262 | -2.4535 | 0.01415  | 0.05071  | 5165.49 | 5486.03 | 5160.19 | 4504.53 | 4746.83 | 4488.11 | Down |
| Ms4a15    | 45.1311 | -2.5731 | 0.59192 | -4.3471 | 1.38E-05 | 0.00013  | 43.5376 | 73.7859 | 114.586 | 15.5507 | 4.2241  | 19.1026 | Down |
| AW11201i  | 3377.64 | 0.95731 | 0.13572 | 7.05341 | 1.75E-12 | 6.04E-11 | 2374.25 | 2282.57 | 2232.52 | 5013.56 | 3712.99 | 4649.98 | Up   |
| Ms4a8a    | 1892.72 | 2.00683 | 0.23572 | 8.51358 | 1.69E-17 | 1.20E-15 | 1024.58 | 718.694 | 519.456 | 2983.67 | 3504.95 | 2604.99 | Up   |
| Ms4a14    | 109.195 | 1.90366 | 0.399   | 4.77102 | 1.83E-06 | 2.13E-05 | 40.6351 | 52.7042 | 44.8795 | 132.7   | 108.771 | 275.48  | Up   |
| Ms4a7     | 548.295 | 2.36018 | 0.26674 | 8.8484  | 8.88E-19 | 7.07E-17 | 224.46  | 180.153 | 131.774 | 761.986 | 748.722 | 1242.68 | Up   |
| Ms4a4b    | 767.961 | -0.539  | 0.1343  | -4.0136 | 5.98E-05 | 0.00048  | 960.729 | 822.186 | 946.289 | 675.939 | 632.559 | 570.062 | Down |
| Ms4a6b    | 1125.17 | -0.2579 | 0.11157 | -2.3112 | 0.02082  | 0.06879  | 1191.96 | 1330.06 | 1154.45 | 1026.35 | 989.496 | 1058.69 | Down |
| Ms4a4d    | 2704.43 | -0.9682 | 0.1283  | -7.5458 | 4.50E-14 | 2.01E-12 | 3655.22 | 3485.19 | 3597.04 | 1957.32 | 1988.5  | 1543.29 | Down |
| Ms4a6d    | 1237.62 | 2.49666 | 0.20519 | 12.1677 | 4.62E-34 | 1.36E-31 | 443.116 | 408.218 | 266.412 | 1933.48 | 2433.08 | 1941.43 | Up   |
| Olfrl1419 | 5.79406 | 3.01244 | 1.16841 | 2.57824 | 0.00993  | 0.03801  | 0       | 1.91652 | 1.90977 | 7.25701 | 11.6163 | 12.0648 | Up   |
| Pat1l     | 2852.21 | 0.26262 | 0.09298 | 2.82454 | 0.00473  | 0.02074  | 2756.41 | 2427.27 | 2596.33 | 3099.78 | 3145.9  | 3087.59 | Up   |
| Osbp      | 5711.61 | 0.20263 | 0.07385 | 2.74381 | 0.00607  | 0.02541  | 5353.19 | 5188.97 | 5391.27 | 6149.8  | 6143.96 | 6042.46 | Up   |
| Mpeg1     | 17883.4 | 2.4367  | 0.25649 | 9.50002 | 2.10E-21 | 2.10E-19 | 8057.35 | 5034.69 | 3637.15 | 27385.9 | 35782.4 | 27403.2 | Up   |
| Lpxn      | 612.487 | 0.89847 | 0.18777 | 4.78485 | 1.71E-06 | 2.00E-05 | 545.671 | 361.264 | 376.224 | 778.574 | 828.98  | 784.213 | Up   |
| Psat1     | 1040.23 | 0.65116 | 0.17414 | 3.73933 | 0.00018  | 0.0013   | 617.266 | 914.179 | 896.635 | 1345.66 | 1224.99 | 1242.68 | Up   |
| Gcnt1     | 593.801 | 0.80275 | 0.21835 | 3.67639 | 0.00024  | 0.00161  | 392.806 | 571.122 | 334.209 | 776.5   | 821.588 | 666.581 | Up   |
| Ostf1     | 8811.42 | 0.84753 | 0.11991 | 4.06595 | 4.78E-05 | 0.00039  | 7374.3  | 7524.25 | 7111.01 | 10547.5 | 11436.8 | 8874.67 | Up   |
| Carnmt1   | 708.426 | -0.5645 | 0.21336 | -2.6456 | 0.00815  | 0.03233  | 946.216 | 804.937 | 784.914 | 466.522 | 487.884 | 760.083 | Down |
| Trpm6     | 3729.42 | 0.76058 | 0.1277  | 5.95594 | 2.59E-09 | 5.27E-08 | 2852.19 | 2495.31 | 2958.23 | 4539.78 | 4253.67 | 5277.35 | Up   |
| Aldh1a1   | 85779.2 | -0.8954 | 0.19929 | -4.4929 | 7.02E-06 | 7.19E-05 | 129348  | 113657  | 91721.3 | 67740.1 | 43656.1 | 68552.3 | Down |
| Aldh1a7   | 9652.79 | -0.5044 | 0.18751 | -2.6901 | 0.00714  | 0.029    | 12530.1 | 10264.9 | 11175   | 8769.58 | 5780.68 | 9396.48 | Down |
| Gda       | 3517.45 | 1.83093 | 0.22786 | 8.03528 | 9.34E-16 | 5.20E-14 | 1834.38 | 1713.37 | 1082.84 | 4700.47 | 6970.82 | 4802.8  | Up   |
| Gm3443    | 50.6702 | 1.2891  | 0.34215 | 3.76764 | 0.00016  | 0.00118  | 24.1875 | 27.7895 | 36.2855 | 67.3865 | 74.9778 | 73.3943 | Up   |
| 1110059E  | 3324.53 | 0.37339 | 0.12466 | 2.99533 | 0.00274  | 0.01302  | 2772.86 | 2850.82 | 3066.13 | 3963.36 | 4064.64 | 3229.35 | Up   |
| Abhd17b   | 4141.32 | 0.23658 | 0.11693 | 2.02331 | 0.04304  | 0.12141  | 3785.83 | 3829.2  | 3792.79 | 4344.88 | 4012.9  | 5082.3  | Up   |
| Cemip2    | 8270.21 | -0.341  | 0.12901 | -2.6429 | 0.00822  | 0.03253  | 7832.89 | 9519.34 | 10376.7 | 7250.79 | 6981.38 | 7660.15 | Down |
| Trpm3     | 671.514 | -1.1765 | 0.35158 | -3.3463 | 0.00082  | 0.00471  | 966.534 | 896.93  | 930.056 | 321.382 | 215.429 | 698.754 | Down |
| Klf9      | 12631.2 | -0.8875 | 0.13488 | -6.5804 | 4.69E-11 | 1.31E-09 | 15660   | 16613.3 | 16922.4 | 9555.41 | 7293.97 | 9742.33 | Down |
| Mamdc2    | 5745.16 | -0.3627 | 0.14758 | -2.4576 | 0.01399  | 0.05023  | 7616.17 | 5591.44 | 6182.87 | 5096.5  | 5480.77 | 4503.19 | Down |
| 1700028P  | 393.308 | -0.6466 | 0.18871 | -3.4265 | 0.00061  | 0.00367  | 463.433 | 508.835 | 467.893 | 348.337 | 236.55  | 334.798 | Down |
| Ptar1     | 3765    | -0.5761 | 0.09098 | -4.1341 | 3.56E-05 | 0.0003   | 4176.7  | 4067.81 | 4514.69 | 3176.5  | 3262.06 | 3392.22 | Down |
| Fam189a2  | 10374.2 | -0.3511 | 0.21117 | -2.6096 | 0.00907  | 0.03521  | 9073.23 | 13598.6 | 14323.2 | 9083.7  | 9739.72 | 6426.52 | Down |
| Tjp2      | 7364.15 | 0.39124 | 0.08622 | 4.53778 | 5.69E-06 | 5.93E-05 | 6563.53 | 6090.69 | 6460.74 | 8022.11 | 8771.35 | 8276.46 | Up   |
| Pip5k1b   | 2514.65 | 0.56015 | 0.12414 | 4.51224 | 6.41E-06 | 6.61E-05 | 2039.49 | 2069.84 | 1988.07 | 2679.91 | 3433.14 | 2877.46 | Up   |
| Tmem252   | 1723.98 | -0.9186 | 0.14519 | -6.3267 | 2.50E-10 | 6.19E-09 | 2302.65 | 2495.31 | 1967.06 | 1350.84 | 1070.81 | 1157.22 | Down |
| Pgm5      | 1055.14 | -1.3603 | 0.18851 | -7.216  | 5.35E-13 | 2.03E-11 | 1345.79 | 1859.02 | 1351.16 | 559.827 | 702.257 | 512.754 | Down |
| Gm10053   | 243.234 | -0.8195 | 0.32564 | -2.5165 | 0.01185  | 0.04393  | 201.24  | 482.004 | 248.27  | 171.058 | 186.916 | 169.913 | Down |
| Cbwd1     | 826.075 | 0.32858 | 0.11702 | 2.80787 | 0.00499  | 0.02167  | 756.586 | 744.567 | 696.11  | 991.1   | 872.277 | 895.812 | Up   |
| Dock8     | 4296.96 | 0.59818 | 0.10369 | 5.76872 | 7.99E-09 | 1.48E-07 | 3292.41 | 3668.21 | 3295.3  | 4894.34 | 5586.37 | 5045.1  | Up   |
| Kank1     | 2100.57 | -0.2921 | 0.14147 | -2.0646 | 0.03896  | 0.11219  | 2381.99 | 2621.8  | 1933.64 | 2002.94 | 1874.45 | 1788.61 | Down |
| Dmrt3     | 21.762  | -4.6271 | 1.30231 | -3.553  | 0.00038  | 0.00245  | 7.74001 | 100.617 | 17.1879 | 0       | 0       | 5.027   | Down |
| Dmrt2     | 209.351 | -0.9241 | 0.4216  | -2.1918 | 0.0284   | 0.08815  | 157.703 | 380.429 | 284.555 | 158.618 | 69.6977 | 205.102 | Down |
| Vldlr     | 2881.18 | -0.5389 | 0.18116 | -2.9746 | 0.00293  | 0.0138   | 3035.05 | 4199.09 | 3005.02 | 2614.6  | 2507    | 1926.35 | Down |
| Gm50114   | 23.6805 | -5.4855 | 1.08952 | -5.0348 | 4.78E-07 | 6.32E-06 | 17.415  | 79.5355 | 42.0148 | 0       | 2.11205 | 1.0054  | Down |
| Kcnv2     | 19.888  | -4.803  | 1.04479 | -4.5971 | 4.28E-06 | 4.60E-05 | 28.0575 | 71.8694 | 15.2781 | 0       | 2.11205 | 2.0108  | Down |
| Glis3     | 1027.75 | -0.3614 | 0.1793  | -2.0158 | 0.04382  | 0.12312  | 1110.69 | 1188.24 | 1168.78 | 907.126 | 692.753 | 1098.9  | Down |
| Slc1a1    | 111.001 | 0.76418 | 0.27274 | 2.80188 | 0.00508  | 0.02201  | 94.8151 | 68.9946 | 83.0748 | 114.039 | 135.171 | 169.913 | Up   |
| 44304021i | 1045.11 | -0.5292 | 0.25902 | -2.0431 | 0.04105  | 0.11693  | 1007.17 | 1469.01 | 1227.98 | 977.623 | 531.181 | 1057.68 | Down |
| Ak3       | 972.829 | -0.4194 | 0.17383 | -2.4129 | 0.01583  | 0.05542  | 1188.09 | 951.551 | 1200.29 | 697.71  | 811.027 | 988.309 | Down |
| Jak2      | 4451.87 | 0.31451 | 0.09783 | 3.21477 | 0.00131  | 0.00699  | 4183.48 | 3833.03 | 3889.24 | 4605.09 | 4941.14 | 5259.25 | Up   |
| Cd274     | 1916.47 | 0.92287 | 0.23923 | 3.8577  | 0.00011  | 0.00085  | 1453.19 | 1463.26 | 1054.19 | 2234.12 | 3452.15 | 1841.89 | Up   |
| Pdcd1lg2  | 67.806  | 1.4945  | 0.3332  | 4.48526 | 7.28E-06 | 7.43E-05 | 31.9275 | 30.6643 | 43.9246 | 95.3779 | 122.499 | 82.4429 | Up   |
| A9300071i | 397.361 | 0.56308 | 0.18833 | 2.9898  | 0.00279  | 0.01323  | 325.08  | 332.516 | 304.608 | 473.779 | 568.142 | 380.042 | Up   |
| Milana    | 225.141 | -1.0683 | 0.47714 | -2.239  | 0.02516  | 0.08012  | 204.143 | 577.83  | 132.729 | 115.075 | 133.059 | 188.01  | Down |
| Il33      | 25033.3 | 2.86339 | 0.249   | 11.4997 | 1.32E-30 | 2.74E-28 | 8488.86 | 5057.69 | 4599.67 | 40813.4 | 35188.9 | 56051.1 | Up   |
| Trpd52l3  | 6.31123 | 6.16042 | 1.57122 | 3.9     |          |          |         |         |         |         |         |         |      |

|          |         |         |         |         |          |          |         |         |         |         |         |         |      |
|----------|---------|---------|---------|---------|----------|----------|---------|---------|---------|---------|---------|---------|------|
| Ankrd22  | 84.5759 | 2.64005 | 0.49943 | 5.28617 | 1.25E-07 | 1.82E-06 | 24.1875 | 37.3721 | 8.59395 | 102.635 | 206.981 | 127.686 | Up   |
| Acta2    | 10648.8 | -1.7675 | 0.30307 | -5.8319 | 5.48E-09 | 1.05E-07 | 8342.77 | 21483.2 | 19560.8 | 5045.7  | 5738.44 | 3721.99 | Down |
| Fas      | 5365.48 | -0.6286 | 0.12965 | -4.8488 | 1.24E-06 | 1.49E-05 | 5998.51 | 6749.02 | 6801.63 | 4481.72 | 3589.43 | 4572.56 | Down |
| Ch25h    | 1310.13 | 2.56822 | 0.24207 | 10.6093 | 2.70E-26 | 4.10E-24 | 478.913 | 337.307 | 317.976 | 2393.78 | 2779.46 | 1553.34 | Up   |
| Gm26902  | 97.8602 | 1.76254 | 0.33276 | 5.29673 | 1.18E-07 | 1.73E-06 | 62.8876 | 34.4973 | 36.2855 | 159.654 | 173.188 | 120.648 | Up   |
| Lipa     | 4907.72 | 1.11383 | 0.20639 | 5.39687 | 6.78E-08 | 1.04E-06 | 4027.71 | 2643.84 | 2634.52 | 6158.09 | 8201.09 | 5781.05 | Up   |
| Ifit2    | 1920.73 | 0.32518 | 0.13594 | 2.39203 | 0.01676  | 0.05808  | 1858.57 | 1658.75 | 1598.47 | 1988.42 | 1958.93 | 2461.22 | Up   |
| Ifit3    | 2865.75 | 0.90288 | 0.21797 | 4.14227 | 3.44E-05 | 0.00029  | 2738.03 | 1708.58 | 1545    | 4255.72 | 3436.31 | 3510.86 | Up   |
| Ifit1bl1 | 668.157 | 1.21902 | 0.14996 | 8.12887 | 4.33E-16 | 2.56E-14 | 465.368 | 358.389 | 380.998 | 987.99  | 869.109 | 947.088 | Up   |
| Ifit3b   | 617.058 | 0.42793 | 0.17575 | 2.43492 | 0.01489  | 0.05278  | 606.623 | 534.708 | 437.336 | 810.712 | 648.4   | 664.57  | Up   |
| Ifit1    | 1653.71 | 1.33105 | 0.19883 | 6.69454 | 2.16E-11 | 6.45E-10 | 891.069 | 930.469 | 1000.72 | 2511.96 | 1686.47 | 2901.59 | Up   |
| Kif20b   | 173.53  | 0.50064 | 0.21635 | 2.31402 | 0.02067  | 0.06841  | 151.898 | 148.53  | 130.819 | 171.058 | 199.589 | 239.285 | Up   |
| Htr7     | 39.9162 | 1.82172 | 0.46607 | 3.90868 | 9.28E-05 | 0.00071  | 21.285  | 16.2904 | 15.2781 | 50.7991 | 44.3531 | 91.4915 | Up   |
| Ankrd1   | 5112.52 | -2.3236 | 0.90249 | -2.5747 | 0.01003  | 0.03832  | 2850.26 | 19462.2 | 3255.2  | 1287.6  | 1454.15 | 2365.71 | Down |
| Gm32027  | 4.95883 | -5.7066 | 1.61771 | -3.5276 | 0.00042  | 0.00266  | 7.74001 | 14.3739 | 7.63906 | 0       | 0       | 0       | Down |
| Hectd2os | 48.8264 | -1.7059 | 0.67819 | -2.5154 | 0.01189  | 0.04402  | 23.22   | 148.53  | 52.5186 | 23.8445 | 12.6723 | 32.1728 | Down |
| Btaf1    | 3187.67 | 0.29951 | 0.10322 | 2.9017  | 0.00371  | 0.01686  | 2779.63 | 2768.41 | 3026.02 | 3337.19 | 3397.23 | 3817.51 | Up   |
| Cpeb3    | 1412.31 | 1.02339 | 0.16745 | 6.11156 | 9.87E-10 | 2.18E-08 | 1061.35 | 1013.84 | 719.027 | 1808.03 | 2009.62 | 1862    | Up   |
| Marchf5  | 5250.84 | 0.46822 | 0.08414 | 5.565   | 2.62E-08 | 4.36E-07 | 4512.43 | 4421.41 | 4284.56 | 6275.24 | 6226.33 | 5785.08 | Up   |
| Kif11    | 271.092 | 0.71506 | 0.24103 | 2.96664 | 0.00301  | 0.01412  | 229.298 | 226.149 | 160.42  | 370.108 | 254.502 | 386.074 | Up   |
| Exoc6    | 2125.99 | 0.2153  | 0.08754 | 2.45929 | 0.01392  | 0.05005  | 1954.35 | 1916.52 | 2031.99 | 2228.94 | 2354.94 | 2269.19 | Up   |
| Myof     | 10719.1 | 1.02318 | 0.12289 | 8.32577 | 8.38E-17 | 5.40E-15 | 7311.41 | 6825.68 | 7071.86 | 14301.5 | 16320.9 | 12483.1 | Up   |
| Cep55    | 104.836 | 1.27963 | 0.30169 | 4.2416  | 2.22E-05 | 0.0002   | 77.4001 | 55.579  | 50.6088 | 151.361 | 115.107 | 178.961 | Up   |
| Rbp4     | 1078    | -1.4459 | 0.1263  | -11.448 | 2.40E-30 | 4.84E-28 | 1562.51 | 1678.87 | 1489.62 | 569.157 | 641.007 | 526.83  | Down |
| Fra10ac1 | 1095.58 | -0.2464 | 0.10519 | -2.3428 | 0.01914  | 0.06451  | 1164.87 | 1173.87 | 1227.98 | 941.338 | 1056.03 | 1009.42 | Down |
| Slc35g1  | 1012.17 | 2.31343 | 0.18382 | 12.585  | 2.55E-36 | 9.03E-34 | 342.496 | 416.843 | 257.818 | 1755.16 | 1740.33 | 1560.38 | Up   |
| Hells    | 280.449 | 0.82898 | 0.18099 | 4.58017 | 4.65E-06 | 4.95E-05 | 219.623 | 214.65  | 171.879 | 379.438 | 322.088 | 375.015 | Up   |
| Cyp2c68  | 6.46006 | 5.19613 | 1.65018 | 3.14884 | 0.00164  | 0.00844  | 0       | 0.95826 | 0       | 16.5875 | 2.11205 | 19.1026 | Up   |
| Cyp2c69  | 2.06943 | 4.55018 | 2.1549  | 2.11155 | 0.03473  | NA       | 0       | 0       | 0       | 8.29373 | 2.11205 | 2.0108  | Up   |
| Pdlim1   | 8471.79 | 0.65595 | 0.15387 | 4.26302 | 2.02E-05 | 0.00018  | 6835.4  | 5685.35 | 7214.14 | 10098.6 | 12151.7 | 8845.52 | Up   |
| Sorbs1   | 819.849 | -0.4932 | 0.19959 | -2.4712 | 0.01346  | 0.04873  | 865.914 | 1143.2  | 867.034 | 611.662 | 578.702 | 852.58  | Down |
| Aldh18a1 | 1130.86 | 0.71699 | 0.1744  | 4.11128 | 3.93E-05 | 0.00033  | 694.666 | 849.017 | 1022.68 | 1563.37 | 1408.74 | 1246.7  | Up   |
| Entpd1   | 7244    | 0.25673 | 0.10506 | 2.44376 | 0.01454  | 0.05176  | 6543.21 | 6218.14 | 7042.26 | 7321.29 | 7788.19 | 8550.93 | Up   |
| Cc2d2b   | 145.898 | 2.06312 | 0.34913 | 5.90929 | 3.44E-09 | 6.89E-08 | 53.2126 | 75.7024 | 40.1051 | 155.507 | 312.584 | 238.28  | Up   |
| Ccnj     | 1488.84 | 1.05407 | 0.10149 | 10.3864 | 2.86E-25 | 3.93E-23 | 991.689 | 905.554 | 1006.45 | 1970.8  | 2091.99 | 1966.56 | Up   |
| Zfp518a  | 1364.44 | 0.36306 | 0.10896 | 3.33201 | 0.00086  | 0.00491  | 1144.55 | 1235.2  | 1201.24 | 1406.82 | 1586.15 | 1612.66 | Up   |
| Blnk     | 915.299 | 0.7189  | 0.17436 | 4.12308 | 3.74E-05 | 0.00032  | 811.734 | 725.402 | 538.554 | 1116.54 | 1073.98 | 1225.58 | Up   |
| Tm9sf3   | 21417.4 | 0.28054 | 0.07691 | 3.64769 | 0.00026  | 0.00177  | 19094.6 | 19393.2 | 19536.9 | 22359.4 | 24042.5 | 24077.3 | Up   |
| Pik3ap1  | 2985.95 | 1.39328 | 0.22058 | 6.31654 | 2.67E-10 | 6.58E-09 | 2277.5  | 1415.35 | 1247.08 | 4158.27 | 4848.21 | 3969.32 | Up   |
| Arhgap19 | 411.385 | 0.59996 | 0.18676 | 3.2125  | 0.00132  | 0.00704  | 399.578 | 302.81  | 278.826 | 452.008 | 535.405 | 499.684 | Up   |
| Pgam1    | 3093.21 | 0.32728 | 0.10515 | 3.11258 | 0.00185  | 0.00936  | 2831.88 | 2930.35 | 2469.33 | 3405.61 | 3542.97 | 3379.15 | Up   |
| Ubttd1   | 1041.67 | 0.32095 | 0.12028 | 2.66848 | 0.00762  | 0.03055  | 1001.36 | 954.426 | 823.109 | 1145.57 | 1154.24 | 1171.29 | Up   |
| Pi4k2a   | 4056.01 | 0.40028 | 0.09093 | 4.40219 | 1.07E-05 | 0.0001   | 3567.18 | 3386.49 | 3536.89 | 4739.86 | 4796.47 | 4309.15 | Up   |
| Avp1     | 2839.12 | 1.0886  | 0.12376 | 8.79641 | 1.41E-18 | 1.09E-16 | 2018.21 | 1640.54 | 1789.45 | 4211.14 | 3770.01 | 3605.37 | Up   |
| Marveld1 | 13419.3 | 0.33304 | 0.12437 | 2.67788 | 0.00741  | 0.02988  | 13516   | 10244.7 | 11871.1 | 15086.3 | 15389.5 | 14408.4 | Up   |
| Zfyve27  | 2881.13 | 0.24203 | 0.08476 | 2.85551 | 0.0043   | 0.01908  | 2764.15 | 2583.47 | 2572.45 | 3104.96 | 3169.13 | 3092.61 | Up   |
| Sfrp5    | 62.2227 | -4.539  | 0.6608  | -6.869  | 6.46E-12 | 2.07E-10 | 86.1076 | 205.067 | 66.8418 | 6.2203  | 1.05603 | 8.04321 | Down |
| Loxl4    | 134.886 | 1.10412 | 0.39379 | 2.80386 | 0.00505  | 0.0219   | 139.32  | 52.7042 | 64.932  | 188.682 | 224.933 | 138.745 | Up   |
| Pyroxd2  | 324.403 | -0.5009 | 0.18527 | -2.7035 | 0.00686  | 0.02808  | 379.261 | 383.303 | 378.134 | 251.922 | 227.045 | 326.755 | Down |
| Hps1     | 989.749 | 0.26878 | 0.12899 | 2.08378 | 0.03718  | 0.10829  | 1004.27 | 822.186 | 867.034 | 1011.83 | 1136.28 | 1096.89 | Up   |
| Got1     | 2285.78 | -1.1076 | 0.26762 | -4.1388 | 3.49E-05 | 0.0003   | 2250.41 | 4735.71 | 2381.48 | 1567.51 | 1271.45 | 1508.1  | Down |
| Entpd7   | 341.803 | 0.40689 | 0.17216 | 2.3635  | 0.0181   | 0.06171  | 336.691 | 258.73  | 286.465 | 380.475 | 361.161 | 427.295 | Up   |
| Cpn1     | 691.499 | 0.38534 | 0.17411 | 2.21315 | 0.02689  | 0.08439  | 590.176 | 608.494 | 600.621 | 744.362 | 644.175 | 961.163 | Up   |
| Erlin1   | 2570.83 | 0.28333 | 0.13345 | 2.12307 | 0.03375  | 0.10027  | 2465.19 | 2155.12 | 2337.55 | 2852.01 | 2432.03 | 3183.1  | Up   |
| Bloc1s2  | 1980.26 | 0.83964 | 0.12285 | 6.83466 | 8.22E-12 | 2.61E-10 | 1423.19 | 1314.73 | 1521.13 | 2593.86 | 2760.45 | 2268.18 | Up   |
| Scd3     | 48.5738 | -1.0922 | 0.46802 | -2.3337 | 0.01961  | 0.06578  | 34.8301 | 67.0781 | 96.4432 | 75.9179 | 38.0169 | 29.1566 | Down |
| Scd2     | 57598.4 | 0.84283 | 0.07126 | 11.827  | 2.83E-32 | 6.57E-30 | 40258.7 | 40904.2 | 42546.7 | 73218.1 | 73575.4 | 75087.4 | Up   |
| Scd4     | 119.646 | -1.0005 | 0.32257 | -3.1017 | 0.00192  | 0.00965  | 106.425 | 222.316 | 149.917 | 81.9006 | 72.8658 | 84.4537 | Down |
| Scd1     | 422704  | 3.30031 | 0.24903 | 13.2524 | 4.37E-40 | 2.14E-37 | 63194.3 | 110719  | 59812   | 650092  | 679542  | 972864  | Up   |
| Gm50337  | 102.381 | 1.4133  | 0.41401 | 3.41368 | 0.00064  | 0.00383  | 24.1875 | 69.9529 | 73.526  | 135.81  | 128.835 | 181.978 | Up   |
| Wnt8b    | 6.93515 | 3.29876 | 1.21427 | 2.71667 | 0.00659  | 0.02714  | 1.935   | 0       | 1.90977 | 10.3672 | 5.28013 | 22.1188 | Up   |
| Ndufb8   | 1645.62 | -0.3716 | 0.15701 | -2.3669 | 0.01794  | 0.0613   | 1605.08 | 2276.82 | 1687.28 | 1447.26 | 1445.7  | 1411.58 | Down |
| Sif2     | 119.357 | 0.96178 | 0.33905 | 2.83672 | 0.00456  | 0.02007  | 94.8151 | 60.3703 | 87.8492 | 130.626 | 118.275 | 224.204 | Up   |
| Twnk     | 609.518 | -0.3146 | 0.13521 | -2.327  | 0.01997  | 0.06675  | 598.883 | 711.986 | 716.162 | 545.313 | 564.974 | 519.792 | Down |
| Pdcd7    | 228.327 | -0.4271 | 0.18089 | -2.361  | 0.01823  | 0.06209  | 265.095 | 265.438 | 254.954 | 205.27  | 213.317 | 165.891 | Down |
| Gm35867  | 100.113 | -0.7083 | 0.23321 | -3.0371 | 0.00239  | 0.01158  | 132.548 | 120.741 | 119.36  | 72.5701 | 76.0338 | 79.4267 | Down |
| Fbxw4    | 1004.71 | 0.45187 | 0.14243 | 3.17256 | 0.00151  | 0.00788  | 816.571 | 779.064 | 950.108 | 1122.76 | 1302.08 | 1057.68 | Up   |
| Oga      | 2529.52 | 0.3528  | 0.13686 | 2.57789 | 0.00994  | 0.03803  | 2437.14 | 1923.23 | 2305.09 | 2619.78 | 2730.88 | 3160.98 | Up   |
| Kcnip2   | 136.904 | -1.8155 | 0.40624 | -4.469  | 7.86E-06 | 7.92E-05 | 211.883 | 308.559 | 119.36  | 55.9827 | 41.185  | 84.4537 | Down |
| Nfkb2    | 2324.29 | 0.56861 | 0.10185 | 5.58282 | 2.37E-08 | 3.97E-07 | 1927.26 | 1705.7  | 1983.29 | 2725.53 | 2828.04 | 2775.91 | Up   |
| Psd      | 847.464 | 0.58539 | 0.19179 | 3.05227 | 0.00227  | 0.01109  | 620.168 | 624.785 | 788.733 | 936.154 | 851.156 | 1263.79 | Up   |
| Mfsd13a  | 1150.35 | 1.29405 | 0.12967 | 9.97972 | 1.87E-23 | 2.18E-21 | 696.601 | 615.202 | 687.516 | 1472.14 | 1807.92 | 1622.72 | Up   |
| Arl3     | 3022.2  | -0.4509 | 0.09537 | -4.7284 | 2.26E-06 | 2.58E-05 | 3364    | 3573.35 | 3534.98 | 2619.78 | 2370.78 | 2670.34 | Down |
| Wbp1l    | 6251.8  | 0.40923 | 0.09011 | 4.54147 | 5.59E-06 | 5.84E-05 | 5131.63 | 5716.01 | 5265.22 | 7140.9  | 7392.18 | 6864.88 | Up   |
| Cnm2     | 1201.98 | 0.6436  | 0.13219 | 4.86861 | 1.12E-06 | 1.37E-05 | 963.631 | 1002.34 | 848.891 | 1504.27 | 1304.19 | 1588.53 | Up   |
| Gm50431  | 521.511 | 0.44998 | 0.16334 | 2.75493 | 0.00587  | 0.02475  | 467.303 | 477.213 | 378.134 | 565.01  | 560.749 | 680.656 | Up   |
| Atp5md   | 1082.16 | -0.3293 | 0.12808 | -2.5714 | 0.01013  | 0.03863  | 1       |         |         |         |         |         |      |

|            |         |         |         |         |          |          |         |         |         |         |         |         |      |
|------------|---------|---------|---------|---------|----------|----------|---------|---------|---------|---------|---------|---------|------|
| Cfap58     | 1029.95 | -0.7074 | 0.23439 | -3.0182 | 0.00254  | 0.01222  | 1302.26 | 1398.1  | 1132.49 | 823.152 | 514.284 | 1009.42 | Down |
| Xpnpep1    | 3977.39 | 0.21458 | 0.08888 | 2.41418 | 0.01577  | 0.05526  | 3572.02 | 3936.53 | 3537.84 | 4305.48 | 4272.68 | 4239.78 | Up   |
| Add3       | 9339.28 | -0.4617 | 0.09254 | -4.989  | 6.07E-07 | 7.89E-06 | 10012.7 | 10816.8 | 11633.3 | 7848.98 | 7893.79 | 7830.06 | Down |
| Dusp5      | 658.925 | 0.64191 | 0.2651  | 2.42141 | 0.01546  | 0.05435  | 582.436 | 542.374 | 419.194 | 865.658 | 1040.18 | 503.706 | Up   |
| Nutrf2-ps1 | 151.244 | 0.51508 | 0.23284 | 2.2122  | 0.02695  | 0.08452  | 118.035 | 145.655 | 109.812 | 177.278 | 204.869 | 151.816 | Up   |
| Smc3       | 3381.01 | -0.2785 | 0.09562 | -2.9121 | 0.00359  | 0.0164   | 3687.15 | 3501.48 | 3930.3  | 2900.73 | 3119.5  | 3146.9  | Down |
| Rbm20      | 397.39  | -2.0928 | 0.354   | -5.9118 | 3.38E-09 | 6.80E-08 | 517.613 | 1036.84 | 377.179 | 154.471 | 118.275 | 179.967 | Down |
| Pdcd4      | 2386.24 | -0.2928 | 0.12862 | -2.2766 | 0.02281  | 0.07404  | 2846.39 | 2586.34 | 2450.23 | 2268.33 | 1861.77 | 2304.38 | Down |
| Adra2a     | 140.449 | -1.7764 | 0.35067 | -5.0656 | 4.07E-07 | 5.46E-06 | 153.833 | 293.227 | 205.3   | 79.8271 | 40.129  | 70.3781 | Down |
| Gm50186    | 134.742 | -1.9086 | 0.26578 | -7.181  | 6.92E-13 | 2.54E-11 | 222.525 | 171.528 | 244.45  | 62.203  | 45.4091 | 62.3349 | Down |
| Gpam       | 10846.8 | 0.91602 | 0.11714 | 7.81976 | 5.29E-15 | 2.69E-13 | 8305.03 | 7167.77 | 7070.91 | 13077.1 | 13879.3 | 15580.7 | Up   |
| Acsf5      | 910.602 | 1.07142 | 0.20042 | 5.34585 | 9.00E-08 | 1.34E-06 | 740.139 | 502.128 | 519.456 | 1031.53 | 1237.66 | 1432.7  | Up   |
| Zdhhc6     | 2578.49 | 0.25715 | 0.09404 | 2.73464 | 0.00624  | 0.02601  | 2284.27 | 2380.31 | 2383.39 | 2633.26 | 2822.76 | 2966.94 | Up   |
| Tcf7l2     | 1493.03 | 0.80226 | 0.17461 | 4.59445 | 4.34E-06 | 4.66E-05 | 1234.53 | 1129.79 | 900.455 | 1837.06 | 2236.66 | 1619.7  | Up   |
| Nrap       | 429.401 | -2.4369 | 0.68011 | -3.5831 | 0.00034  | 0.00221  | 380.228 | 1441.22 | 353.307 | 107.818 | 152.068 | 141.762 | Down |
| Casp7      | 2259.19 | 0.73603 | 0.11271 | 6.53032 | 6.56E-11 | 1.79E-09 | 1867.28 | 1618.5  | 1599.43 | 2751.44 | 3014.95 | 2703.52 | Up   |
| Plekhs1    | 87.4424 | 1.60887 | 0.4136  | 3.88988 | 0.0001   | 0.00076  | 34.8301 | 59.412  | 35.3307 | 149.287 | 72.8658 | 172.929 | Up   |
| Nhlrc2     | 8554.16 | -0.275  | 0.08797 | -3.1264 | 0.00177  | 0.00899  | 9010.34 | 9433.1  | 9657.69 | 7359.65 | 8200.04 | 7664.17 | Down |
| Gm32492    | 28.02   | -3.5243 | 0.64924 | -5.4283 | 5.69E-08 | 8.94E-07 | 50.3101 | 73.7859 | 30.5563 | 3.11015 | 6.33615 | 4.0216  | Down |
| Gm50100    | 43.2411 | -0.7871 | 0.38448 | -2.0472 | 0.04064  | 0.11592  | 53.2126 | 66.1198 | 44.8795 | 26.9546 | 40.129  | 28.1512 | Down |
| Tdrd1      | 5.76776 | 2.63433 | 1.08007 | 2.43903 | 0.01473  | 0.05228  | 1.935   | 1.91652 | 0.95488 | 6.2203  | 9.50423 | 14.0756 | Up   |
| Trub1      | 705.138 | -0.3594 | 0.12052 | -2.982  | 0.00286  | 0.01351  | 787.546 | 836.56  | 753.403 | 577.451 | 650.512 | 625.359 | Down |
| Atrn1      | 4167.37 | 0.42838 | 0.12633 | 3.39088 | 0.0007   | 0.00412  | 4062.54 | 3176.63 | 3420.39 | 4451.66 | 4988.66 | 4904.35 | Up   |
| Gm16277    | 126.674 | -1.1045 | 0.25274 | -4.3702 | 1.24E-05 | 0.00012  | 201.24  | 171.528 | 146.097 | 90.1943 | 66.5296 | 84.4537 | Down |
| Gfra1      | 1476.34 | -1.23   | 0.24684 | -4.983  | 6.26E-07 | 8.13E-06 | 2162.37 | 2082.3  | 1966.1  | 810.712 | 580.814 | 1255.75 | Down |
| Eno4       | 2552.49 | -0.8738 | 0.21508 | -4.0627 | 4.85E-05 | 0.0004   | 2889.93 | 3799.5  | 3218.91 | 1986.35 | 1235.55 | 2184.74 | Down |
| Shtn1      | 4055.84 | 1.29354 | 0.12251 | 10.5586 | 4.63E-26 | 6.85E-24 | 2471.97 | 2239.45 | 2339.46 | 5403.36 | 6584.32 | 5296.45 | Up   |
| Pdzd8      | 2962.76 | 0.32586 | 0.1306  | 2.49512 | 0.01259  | 0.04615  | 2949.91 | 2246.16 | 2692.77 | 3112.22 | 3337.04 | 3438.47 | Up   |
| Eif3a      | 9376.23 | 0.25275 | 0.0935  | 2.70313 | 0.00687  | 0.0281   | 8323.42 | 8198.86 | 9148.73 | 9621.76 | 10444.1 | 10520.5 | Up   |
| Sfxn4      | 553.221 | -0.577  | 0.1493  | -3.8648 | 0.00011  | 0.00083  | 642.421 | 614.244 | 730.485 | 498.66  | 420.298 | 413.22  | Down |
| Zfp950     | 3706.3  | -0.3346 | 0.09744 | -3.4336 | 0.0006   | 0.00359  | 3818.73 | 4123.39 | 4460.26 | 3279.13 | 3252.56 | 3303.75 | Down |
| Gm6020     | 13.2394 | 2.42147 | 0.76854 | 3.15072 | 0.00163  | 0.00839  | 5.80501 | 5.74955 | 0.95488 | 18.6609 | 21.1205 | 27.1458 | Up   |
| Csf2ra     | 3267.94 | 1.2983  | 0.15416 | 8.42195 | 3.70E-17 | 2.52E-15 | 2107.22 | 1869.56 | 1691.1  | 4725.35 | 5346.66 | 3867.78 | Up   |
| Gm18999    | 5.63613 | 3.42227 | 1.2511  | 2.73541 | 0.00623  | 0.02597  | 1.935   | 0.95826 | 0       | 13.4773 | 7.39218 | 10.054  | Up   |
| Nudt10     | 111.788 | -0.8279 | 0.26981 | -3.0686 | 0.00215  | 0.01059  | 143.19  | 139.906 | 146.097 | 70.4967 | 65.4736 | 105.567 | Down |
| Bmp15      | 14.1998 | -1.3707 | 0.62401 | -2.1966 | 0.02805  | 0.08731  | 17.415  | 25.873  | 18.1428 | 6.2203  | 9.50423 | 8.04321 | Down |
| Clcn5      | 1055.49 | 1.56258 | 0.16528 | 9.45408 | 3.26E-21 | 3.19E-19 | 623.071 | 518.418 | 460.254 | 1435.85 | 1817.42 | 1477.94 | Up   |
| 2010204K   | 268.857 | -1.2283 | 0.2073  | -5.9252 | 3.12E-09 | 6.30E-08 | 357.976 | 322.933 | 449.75  | 176.242 | 138.339 | 167.902 | Down |
| Cacna1f    | 20.9634 | 1.57139 | 0.56143 | 2.79891 | 0.00513  | 0.02217  | 6.77251 | 14.3739 | 10.5037 | 40.4319 | 29.5687 | 24.1296 | Up   |
| Plp2       | 6952.06 | 0.45493 | 0.11902 | 3.82214 | 0.00013  | 0.00097  | 6252.96 | 5580.9  | 5760.81 | 8502.11 | 8612.94 | 7002.62 | Up   |
| Praf2      | 384.669 | -0.3714 | 0.16471 | -2.2552 | 0.02412  | 0.07741  | 400.546 | 426.425 | 474.577 | 339.006 | 374.889 | 292.572 | Down |
| Tfe3       | 2785.69 | 0.25168 | 0.09908 | 2.54014 | 0.01108  | 0.04159  | 2681.91 | 2372.65 | 2575.32 | 2933.91 | 3194.48 | 2955.88 | Up   |
| Hdac6      | 1030.33 | 0.37457 | 0.1088  | 3.44272 | 0.00058  | 0.00349  | 956.859 | 836.56  | 898.545 | 1140.39 | 1195.42 | 1154.2  | Up   |
| Gata1      | 25.8302 | -1.2656 | 0.56327 | -2.247  | 0.02464  | 0.07873  | 29.9925 | 51.746  | 27.6916 | 8.29373 | 22.1765 | 15.081  | Down |
| Was        | 583.432 | 0.85776 | 0.22151 | 3.87231 | 0.00011  | 0.00081  | 516.646 | 406.302 | 321.796 | 699.783 | 916.63  | 639.435 | Up   |
| Rbm3       | 8055.39 | 0.27125 | 0.10663 | 2.54383 | 0.01096  | 0.0412   | 6810.24 | 7839.51 | 7251.38 | 9296.23 | 8052.19 | 9082.79 | Up   |
| Slc38a5    | 1162.01 | -0.7681 | 0.14436 | -5.3208 | 1.03E-07 | 1.53E-06 | 1271.3  | 1531.3  | 1589.88 | 913.347 | 908.182 | 758.072 | Down |
| Xk         | 289.831 | -0.3886 | 0.18166 | -2.1393 | 0.03241  | 0.09713  | 316.373 | 358.389 | 311.292 | 224.967 | 233.382 | 294.582 | Down |
| Cybb       | 7831.94 | 2.16964 | 0.28464 | 7.6223  | 2.49E-14 | 1.16E-12 | 3937.73 | 2803.86 | 1803.77 | 9393.68 | 17209   | 11843.6 | Up   |
| Dynlt3     | 10276.9 | 0.25699 | 0.07826 | 3.28376 | 0.00102  | 0.00569  | 9499.9  | 9085.25 | 9506.81 | 10794.3 | 11576.2 | 11199.2 | Up   |
| Sytl5      | 23.3786 | -1.7101 | 0.54468 | -3.1395 | 0.00169  | 0.00866  | 33.8626 | 35.4556 | 38.1953 | 9.33044 | 6.33615 | 17.0918 | Down |
| SrpX       | 468.599 | -1.2524 | 0.21462 | -5.8352 | 5.37E-09 | 1.03E-07 | 497.296 | 828.894 | 654.095 | 304.794 | 266.118 | 260.399 | Down |
| Tspan7     | 27277.7 | -0.8231 | 0.1227  | -6.7086 | 1.96E-11 | 5.89E-10 | 33774.5 | 31960.8 | 38829.4 | 20150.6 | 21325.4 | 17625.7 | Down |
| Mid1ip1    | 9689.12 | 0.816   | 0.1027  | 7.94584 | 1.93E-15 | 1.02E-13 | 6917.64 | 7220.48 | 6920.99 | 12606.5 | 13353.4 | 11115.7 | Up   |
| Atp6ap2    | 7991.78 | 0.43721 | 0.09298 | 4.70199 | 2.58E-06 | 2.91E-05 | 7063.73 | 6719.31 | 6586.78 | 9236.1  | 9777.74 | 8567.02 | Up   |
| Gm14634    | 65.4825 | -1.249  | 0.32148 | -3.8852 | 0.0001   | 0.00077  | 97.1716 | 101.575 | 77.3455 | 37.3218 | 31.6808 | 47.2538 | Down |
| Usp9x      | 2795.62 | 0.36759 | 0.14264 | 2.57703 | 0.00997  | 0.0381   | 2721.58 | 2231.78 | 2370.97 | 2737.97 | 3112.11 | 3599.34 | Up   |
| Cask       | 2537.11 | 0.34825 | 0.10214 | 3.40972 | 0.00065  | 0.00388  | 2417.79 | 2054.51 | 2224.88 | 2778.4  | 2877.67 | 2869.41 | Up   |
| Maob       | 3138.11 | -0.5543 | 0.11839 | -4.6815 | 2.85E-06 | 3.19E-05 | 4026.74 | 3624.13 | 3550.25 | 2624.96 | 2258.84 | 2743.74 | Down |
| Ndp        | 15.7896 | -1.8364 | 0.627   | -2.9289 | 0.0034   | 0.01569  | 27.09   | 26.8312 | 20.0525 | 8.29373 | 8.4482  | 4.0216  | Down |
| Efhc2      | 119.559 | -1.4289 | 0.31261 | -4.5709 | 4.86E-06 | 5.15E-05 | 156.735 | 218.483 | 148.007 | 62.203  | 46.4651 | 85.4591 | Down |
| Slc9a7     | 70.903  | 0.89048 | 0.37431 | 2.37898 | 0.01736  | 0.05965  | 72.5626 | 33.5391 | 42.9697 | 97.4513 | 103.49  | 75.4051 | Up   |
| Rp2        | 3188.37 | 0.61743 | 0.09483 | 6.51101 | 7.46E-11 | 2.01E-09 | 2559.04 | 2652.46 | 2337.55 | 3736.32 | 3936.86 | 3907.99 | Up   |
| Rgn        | 53.2207 | 0.93602 | 0.43646 | 2.14459 | 0.03199  | 0.09626  | 53.2126 | 34.4973 | 21.9623 | 60.1295 | 57.0254 | 92.4969 | Up   |
| Ndufb11    | 4257.06 | -0.2662 | 0.10948 | -2.4313 | 0.01505  | 0.05319  | 4359.56 | 4911.08 | 4675.11 | 4190.41 | 3888.29 | 3517.9  | Down |
| Usp11      | 1292.8  | -0.2846 | 0.09696 | -2.935  | 0.00334  | 0.01542  | 1374.82 | 1398.1  | 1486.75 | 1136.24 | 1178.52 | 1182.35 | Down |
| Syn1       | 92.6668 | 1.15935 | 0.26912 | 4.30788 | 1.65E-05 | 0.00015  | 65.7901 | 51.746  | 54.4283 | 149.287 | 115.107 | 119.643 | Up   |
| Elk1       | 680.541 | 0.27501 | 0.11154 | 2.38301 | 0.01717  | 0.05912  | 641.453 | 575.913 | 630.223 | 745.399 | 760.338 | 729.921 | Up   |
| A230072C   | 304.928 | -0.4172 | 0.18355 | -2.2732 | 0.02301  | 0.07461  | 328.95  | 321.017 | 396.276 | 229.114 | 256.614 | 297.599 | Down |
| Slc6a14    | 8450.43 | 1.00368 | 0.13529 | 7.4187  | 1.18E-13 | 4.95E-12 | 6677.7  | 4941.74 | 5252.81 | 10920.8 | 11315.3 | 11594.3 | Up   |
| Khlh13     | 924.548 | -0.7269 | 0.20302 | -3.5805 | 0.00034  | 0.00223  | 867.849 | 1464.22 | 1125.81 | 701.857 | 757.17  | 630.386 | Down |
| Gm2223     | 128.098 | 0.47577 | 0.22581 | 2.10692 | 0.03512  | 0.10362  | 99.6527 | 106.367 | 115.541 | 144.104 | 132.003 | 170.918 | Up   |
| Dock11     | 963.588 | 0.45993 | 0.12512 | 3.67589 | 0.00024  | 0.00161  | 863.011 | 841.351 | 729.531 | 1035.68 | 1164.8  | 1147.16 | Up   |
| Il13ra1    | 5890.55 | 0.53994 | 0.20293 | 2.66077 | 0.0078   | 0.03113  | 3638.77 | 6421.29 | 4342.81 | 6827.81 | 6476.6  | 7636.02 | Up   |
| Zcchc12    | 52.1048 | -1.0513 | 0.41803 | -2.5149 | 0.01191  | 0.04407  | 46.4401 | 73.7859 | 90.7139 | 31.1015 | 25.3446 | 45.243  | Down |
| Gm14569    | 212.04  | 1.13991 | 0.26492 | 4.30283 | 1.69E-05 | 0.00016  | 179.955 | 118.824 | 98.3529 | 294.427 | 326.312 | 254.366 | Up   |
| Pgrmc1     | 17843.9 | -0.7069 | 0.11106 | -6.3652 | 1.95E-10 | 4.9      |         |         |         |         |         |         |      |

|           |         |         |         |         |          |          |         |         |         |         |         |         |      |
|-----------|---------|---------|---------|---------|----------|----------|---------|---------|---------|---------|---------|---------|------|
| Cul4b     | 1857.95 | 0.6328  | 0.10075 | 6.28117 | 3.36E-10 | 8.08E-09 | 1537.36 | 1389.48 | 1443.78 | 2157.41 | 2387.67 | 2231.99 | Up   |
| C1galt1c1 | 3415.4  | 0.7364  | 0.09892 | 7.44414 | 9.76E-14 | 4.14E-12 | 2516.47 | 2479.02 | 2690.86 | 4442.33 | 4421.58 | 3942.18 | Up   |
| Ap3s1-ps. | 175.42  | 0.83278 | 0.4161  | 2.00139 | 0.04535  | 0.12632  | 158.67  | 46.9547 | 172.834 | 243.628 | 212.261 | 218.172 | Up   |
| Gria3     | 1551.07 | -0.6792 | 0.11717 | -5.797  | 6.75E-09 | 1.27E-07 | 1737.63 | 2044.92 | 1946.05 | 1144.53 | 1284.13 | 1149.17 | Down |
| Sh2d1a    | 52.8478 | -0.841  | 0.32243 | -2.6084 | 0.0091   | 0.03531  | 59.0176 | 74.7442 | 69.7065 | 41.4686 | 36.9609 | 35.189  | Down |
| Dcaf12l1  | 112.353 | 0.54993 | 0.26198 | 2.09912 | 0.03581  | 0.10514  | 89.0101 | 100.617 | 84.0297 | 147.214 | 102.434 | 150.81  | Up   |
| Prr32     | 13.7566 | -7.1786 | 1.49287 | -4.8086 | 1.52E-06 | 1.80E-05 | 17.415  | 54.6207 | 10.5037 | 0       | 0       | 0       | Down |
| Ocr1      | 2390.93 | 0.32914 | 0.09573 | 3.43833 | 0.00059  | 0.00354  | 2266.86 | 2045.88 | 2045.36 | 2600.08 | 2757.28 | 2630.13 | Up   |
| Xpnpep2   | 883.652 | -0.8719 | 0.15409 | -5.6581 | 1.53E-08 | 2.67E-07 | 1053.61 | 1338.69 | 1036.05 | 589.891 | 687.473 | 596.203 | Down |
| Sash3     | 1219.16 | 0.70449 | 0.16271 | 4.32961 | 1.49E-05 | 0.00014  | 1105.85 | 835.602 | 840.297 | 1530.19 | 1674.86 | 1328.13 | Up   |
| Zdhhc9    | 2916.42 | 1.28052 | 0.11996 | 10.6744 | 1.34E-26 | 2.10E-24 | 1908.88 | 1559.09 | 1634.76 | 3978.92 | 4439.53 | 3977.37 | Up   |
| Aifm1     | 2121    | -0.2764 | 0.13263 | -2.0836 | 0.03719  | 0.10831  | 2356.83 | 2629.46 | 1984.25 | 1982.2  | 1929.36 | 1843.91 | Down |
| Rab33a    | 34.6592 | -1.778  | 0.72425 | -2.455  | 0.01409  | 0.05053  | 25.155  | 94.8676 | 41.06   | 7.25701 | 8.4482  | 31.1674 | Down |
| Arhgap36  | 14.4624 | -2.1918 | 0.79215 | -2.7669 | 0.00566  | 0.02404  | 29.025  | 31.6225 | 10.5037 | 6.2203  | 7.39218 | 2.0108  | Down |
| Igslf1    | 174.699 | -1.7702 | 0.89493 | -1.978  | 0.04793  | 0.13209  | 208.013 | 550.04  | 52.5186 | 53.9092 | 78.1459 | 105.567 | Down |
| Rap2c     | 3492.97 | 0.47587 | 0.09651 | 4.93073 | 8.19E-07 | 1.04E-05 | 2894.76 | 2897.77 | 2973.51 | 3794.38 | 4388.84 | 4008.53 | Up   |
| Mbnl3     | 178.257 | 0.76106 | 0.22988 | 3.3107  | 0.00093  | 0.00525  | 166.41  | 107.325 | 123.18  | 220.82  | 238.662 | 213.145 | Up   |
| Gpc4      | 1620.93 | 0.48808 | 0.15876 | 3.07443 | 0.00211  | 0.01041  | 1374.82 | 1525.55 | 1147.77 | 2011.23 | 1605.16 | 2061.07 | Up   |
| Gm14586   | 93.103  | -0.5007 | 0.24649 | -2.0313 | 0.04222  | 0.11956  | 95.7826 | 113.075 | 118.405 | 77.7537 | 79.2019 | 74.3997 | Down |
| Hprt      | 7799.84 | 0.4595  | 0.09382 | 4.89797 | 9.68E-07 | 1.20E-05 | 6633.19 | 6621.57 | 6449.28 | 9187.38 | 9614.05 | 8293.55 | Up   |
| C430049B  | 348.209 | -1.019  | 0.30044 | -3.3919 | 0.00069  | 0.0041   | 281.543 | 596.037 | 521.366 | 289.244 | 186.916 | 214.15  | Down |
| Fam122b   | 645.149 | 0.60999 | 0.17536 | 3.47842 | 0.0005   | 0.00313  | 565.988 | 503.086 | 463.118 | 674.902 | 940.919 | 722.883 | Up   |
| Gm14597   | 442.761 | -0.5997 | 0.13828 | -4.3371 | 1.44E-05 | 0.00014  | 506.003 | 537.583 | 556.697 | 347.3   | 381.225 | 327.761 | Down |
| Rtl8a     | 1374.99 | -0.8932 | 0.20168 | -4.4286 | 9.48E-06 | 9.35E-05 | 1376.75 | 1858.06 | 2127.48 | 952.742 | 1142.62 | 792.256 | Down |
| Rtl8b     | 1514.19 | -0.7203 | 0.15875 | -4.5371 | 5.70E-06 | 5.94E-05 | 1546.07 | 1983.6  | 2123.66 | 1118.62 | 1274.62 | 1038.58 | Down |
| Ct55      | 20.8674 | 1.67829 | 0.65424 | 2.56523 | 0.01031  | 0.03921  | 11.61   | 14.3739 | 3.81953 | 42.5053 | 33.7928 | 19.1026 | Up   |
| Xlr       | 382.806 | 0.90266 | 0.21254 | 4.24702 | 2.17E-05 | 0.00019  | 322.178 | 224.233 | 253.999 | 589.891 | 496.332 | 410.204 | Up   |
| Zfp449    | 250.324 | -0.4714 | 0.19015 | -2.4792 | 0.01317  | 0.04784  | 283.478 | 300.893 | 288.375 | 181.425 | 196.421 | 251.35  | Down |
| Mmgt1     | 2945.68 | 0.25185 | 0.0998  | 2.52367 | 0.01161  | 0.04324  | 2860.9  | 2640.96 | 2565.77 | 3028.25 | 3395.12 | 3183.1  | Up   |
| Slc9a6    | 4217.31 | 0.54324 | 0.11808 | 4.60056 | 4.21E-06 | 4.54E-05 | 3705.53 | 3113.38 | 3478.64 | 4753.34 | 5513.51 | 4739.46 | Up   |
| Fhl1      | 46098.6 | -0.7813 | 0.10744 | -7.2726 | 3.53E-13 | 1.37E-11 | 54601.9 | 57637.3 | 62616.4 | 34979.8 | 36064.3 | 30691.9 | Down |
| Htatsf1   | 2620.49 | -0.3362 | 0.09867 | -3.4079 | 0.00065  | 0.0039   | 2708.04 | 2959.1  | 3106.23 | 2246.56 | 2385.56 | 2317.45 | Down |
| RbmX      | 3003.05 | -0.2486 | 0.09567 | -2.5987 | 0.00936  | 0.03618  | 3274.99 | 3173.75 | 3334.45 | 2711.01 | 2945.25 | 2578.85 | Down |
| Gm364     | 8.5676  | 3.27463 | 1.07046 | 3.05908 | 0.00222  | 0.01087  | 3.87001 | 0       | 0.95488 | 12.4406 | 20.0645 | 14.0756 | Up   |
| F9        | 21.3886 | 2.42355 | 0.62104 | 3.90242 | 9.52E-05 | 0.00073  | 5.80501 | 11.4991 | 2.86465 | 37.3218 | 30.6247 | 40.216  | Up   |
| Gm5637    | 203.413 | 1.18582 | 0.21625 | 5.4837  | 4.17E-08 | 6.69E-07 | 130.613 | 112.116 | 129.864 | 298.574 | 322.088 | 227.221 | Up   |
| Mamld1    | 486.291 | -0.3088 | 0.13865 | -2.227  | 0.02595  | 0.08204  | 553.411 | 530.875 | 529.96  | 467.559 | 449.867 | 386.074 | Down |
| Mtm1      | 1428.98 | 0.34525 | 0.12517 | 2.75823 | 0.00581  | 0.02456  | 1413.52 | 1255.32 | 1107.66 | 1624.53 | 1568.2  | 1604.62 | Up   |
| Hmgb3     | 944.75  | 0.84211 | 0.10961 | 7.68304 | 1.55E-14 | 7.28E-13 | 667.576 | 707.195 | 655.05  | 1142.46 | 1233.44 | 1262.78 | Up   |
| Prrg3     | 8013.15 | 1.21175 | 0.14722 | 8.23065 | 1.86E-16 | 1.14E-14 | 5866.93 | 4145.43 | 4486.04 | 11671.3 | 10789.4 | 11119.7 | Up   |
| Cnga2     | 179.644 | -0.8532 | 0.2754  | -3.098  | 0.00195  | 0.00975  | 298.958 | 169.612 | 225.352 | 121.296 | 109.827 | 152.821 | Down |
| Gabre     | 832.736 | -1.7439 | 0.22339 | -7.8063 | 5.89E-15 | 2.96E-13 | 1280.97 | 1141.29 | 1425.64 | 436.457 | 256.614 | 455.447 | Down |
| Gabra3    | 477.531 | -1.1172 | 0.22166 | -5.0401 | 4.65E-07 | 6.17E-06 | 833.019 | 643.95  | 484.126 | 330.712 | 299.911 | 273.469 | Down |
| Gabrq     | 101.668 | -2.0347 | 0.3376  | -6.027  | 1.67E-09 | 3.53E-08 | 227.363 | 119.782 | 143.232 | 42.5053 | 35.9049 | 41.2214 | Down |
| Nsdhl     | 2999.98 | 1.24537 | 0.1157  | 10.7639 | 5.10E-27 | 8.46E-25 | 1850.83 | 1918.43 | 1570.78 | 3991.36 | 4298.02 | 4370.48 | Up   |
| Zfp185    | 847.526 | 0.41324 | 0.12589 | 3.28243 | 0.00103  | 0.00571  | 772.066 | 665.99  | 742.899 | 887.429 | 1005.34 | 1011.43 | Up   |
| Zfp275    | 1582.92 | -0.4033 | 0.12079 | -3.3386 | 0.00084  | 0.00482  | 1617.66 | 1786.19 | 2004.3  | 1302.12 | 1389.73 | 1397.51 | Down |
| Bgn       | 44525.7 | -0.3136 | 0.12109 | -2.5897 | 0.00961  | 0.03695  | 52978.4 | 51394.3 | 43664.9 | 42452.5 | 40970.6 | 35693.7 | Down |
| Pnck      | 252.187 | -1.1247 | 0.298   | -3.7742 | 0.00016  | 0.00115  | 297.023 | 386.178 | 354.262 | 218.747 | 95.0423 | 161.87  | Down |
| Abcd1     | 3326.96 | 0.41983 | 0.12929 | 3.24713 | 0.00117  | 0.00634  | 3043.76 | 2836.45 | 2658.39 | 3750.84 | 4322.31 | 3350    | Up   |
| PlxnB3    | 320.446 | 1.80309 | 0.26495 | 6.80534 | 1.01E-11 | 3.15E-10 | 135.45  | 183.986 | 108.857 | 567.084 | 363.273 | 564.03  | Up   |
| SrpK3     | 283.21  | -0.4881 | 0.2223  | -2.1955 | 0.02813  | 0.08752  | 312.503 | 383.303 | 296.014 | 261.252 | 268.23  | 177.956 | Down |
| Idh3g     | 5616.63 | -0.3597 | 0.13515 | -2.6617 | 0.00777  | 0.03108  | 5789.53 | 7451.42 | 5698.74 | 5052.95 | 5075.26 | 4631.88 | Down |
| Ssr4      | 3751.76 | 0.36181 | 0.0999  | 3.62163 | 0.00029  | 0.00194  | 3304.99 | 3379.78 | 3166.39 | 4550.15 | 4209.32 | 3899.95 | Up   |
| Pdzd4     | 285.316 | -0.6368 | 0.19851 | -3.2081 | 0.00134  | 0.00712  | 374.423 | 324.85  | 342.803 | 216.674 | 182.692 | 270.453 | Down |
| Renbp     | 3920.58 | 1.10639 | 0.14861 | 7.44495 | 9.70E-14 | 4.13E-12 | 2912.18 | 2216.45 | 2331.82 | 5398.18 | 5946.48 | 4718.35 | Up   |
| Dnase1l1  | 2554.76 | 0.41949 | 0.10265 | 4.08657 | 4.38E-05 | 0.00036  | 2346.19 | 2039.17 | 2172.36 | 2980.56 | 3023.4  | 2766.86 | Up   |
| Atp6ap1   | 14998.8 | 0.33702 | 0.09977 | 3.37813 | 0.00073  | 0.00427  | 13176.4 | 13569.9 | 13017.9 | 16762.7 | 18230.2 | 15235.8 | Up   |
| Plxna3    | 473.326 | -0.4447 | 0.1567  | -2.8376 | 0.00455  | 0.02002  | 535.996 | 512.668 | 588.208 | 416.76  | 442.475 | 343.847 | Down |
| Ikbkg     | 3528.54 | -0.2997 | 0.1303  | -2.3003 | 0.02143  | 0.07037  | 4478.56 | 3605.93 | 3597.04 | 3057.28 | 2997    | 3435.45 | Down |
| Mpp1      | 4340.47 | 0.43273 | 0.12258 | 3.53011 | 0.00042  | 0.00264  | 4031.58 | 3663.42 | 3387.92 | 4866.34 | 5543.08 | 4550.44 | Up   |
| Fundc2    | 2712.29 | -0.3538 | 0.10737 | -3.295  | 0.00098  | 0.00551  | 3050.53 | 3310.78 | 2768.21 | 2374.08 | 2464.76 | 2305.38 | Down |
| Cmc4      | 884.364 | -0.4307 | 0.12777 | -3.3705 | 0.00075  | 0.00437  | 1066.19 | 994.672 | 985.439 | 668.682 | 768.786 | 822.418 | Down |
| Rab39b    | 56.3479 | -1.0587 | 0.34618 | -3.0582 | 0.00223  | 0.0109   | 59.9851 | 88.1598 | 80.2102 | 34.2116 | 44.3531 | 31.1674 | Down |
| Pls3      | 18690.2 | 0.25021 | 0.08246 | 3.03429 | 0.00241  | 0.01167  | 17183.8 | 16216.6 | 17820   | 19714.2 | 20936.8 | 20269.9 | Up   |
| Prrg1     | 1329.18 | -0.5331 | 0.14372 | -3.7095 | 0.00021  | 0.00144  | 1367.08 | 1614.67 | 1734.07 | 1066.78 | 1210.21 | 982.277 | Down |
| Cfap47    | 493.234 | -0.4336 | 0.15085 | -2.8742 | 0.00405  | 0.01817  | 569.858 | 593.162 | 537.599 | 412.613 | 369.609 | 476.56  | Down |
| Tmem47    | 2304.47 | -0.6384 | 0.12261 | -5.2069 | 1.92E-07 | 2.73E-06 | 2507.76 | 2946.65 | 2963.96 | 1732.35 | 1978.99 | 1697.12 | Down |
| Actr3-ps  | 536.026 | 0.81936 | 0.14758 | 5.55179 | 2.83E-08 | 4.68E-07 | 440.213 | 356.472 | 366.675 | 636.544 | 726.545 | 689.705 | Up   |
| Dmd       | 2973.06 | -0.7133 | 0.11941 | -5.9736 | 2.32E-09 | 4.77E-08 | 3215.97 | 4039.06 | 3825.26 | 2333.65 | 2215.54 | 2208.87 | Down |
| Gk        | 2411.95 | 1.1176  | 0.12862 | 8.68911 | 3.65E-18 | 2.76E-16 | 1435.77 | 1769.9  | 1359.75 | 3276.02 | 3385.29 | 3344.97 | Up   |
| 5430427C  | 190.842 | 0.90853 | 0.25456 | 3.56896 | 0.00036  | 0.00232  | 168.345 | 129.365 | 100.263 | 265.399 | 274.567 | 207.113 | Up   |
| Pdk3      | 1972.79 | 0.60001 | 0.11019 | 5.44506 | 5.18E-08 | 8.19E-07 | 1644.75 | 1588.79 | 1471.47 | 2231.01 | 2587.26 | 2313.43 | Up   |
| Eif2s3x   | 2120.08 | 0.374   | 0.11881 | 3.14799 | 0.00164  | 0.00846  | 2053.04 | 1701.87 | 1785.63 | 2222.72 | 2445.75 | 2511.49 | Up   |
| Apoo      | 1028.17 | -0.4305 | 0.18409 | -2.3383 | 0.01937  | 0.06509  | 952.989 | 1497.76 | 1090.48 | 906.09  | 890.229 | 831.467 | Down |
| Arhgef9   | 286.254 | -0.778  | 0.18798 | -4.1387 | 3.49E-05 | 0.0003   | 325.08  | 418.759 | 340.893 | 200.086 | 238.662 | 194.042 | Down |
| Asb12     | 8.83159 | -4.6136 | 1.38514 | -3.3308 | 0.00087  | 0.00493  | 12.577  |         |         |         |         |         |      |

|          |         |         |         |         |          |          |         |         |         |         |         |         |      |
|----------|---------|---------|---------|---------|----------|----------|---------|---------|---------|---------|---------|---------|------|
| Tmem28   | 594.996 | 1.6456  | 0.17741 | 9.27572 | 1.76E-20 | 1.61E-18 | 328.95  | 267.354 | 268.322 | 819.006 | 1073.98 | 812.364 | Up   |
| Eda      | 237.565 | -0.602  | 0.226   | -2.6638 | 0.00773  | 0.03091  | 359.911 | 259.688 | 239.676 | 213.563 | 181.636 | 170.918 | Down |
| Awat1    | 350.02  | 10.0935 | 1.03966 | 9.70845 | 2.78E-22 | 2.96E-20 | 1.935   | 0       | 0       | 645.874 | 618.831 | 833.477 | Up   |
| Kif4     | 139.192 | 0.72966 | 0.23512 | 3.10339 | 0.00191  | 0.00961  | 123.84  | 104.45  | 85.9395 | 188.682 | 156.292 | 175.945 | Up   |
| Gdpd2    | 697.963 | -2.6767 | 0.27836 | -9.616  | 6.84E-22 | 7.03E-20 | 932.671 | 1377.02 | 1312.01 | 159.654 | 130.947 | 125.48  | Down |
| Tex11    | 507.897 | 0.92697 | 0.27417 | 3.38094 | 0.00072  | 0.00424  | 516.646 | 262.563 | 271.187 | 590.928 | 765.618 | 640.44  | Up   |
| Foxo4    | 2229.27 | -0.3089 | 0.09323 | -3.3128 | 0.00092  | 0.00521  | 2572.59 | 2306.53 | 2521.85 | 1995.68 | 2005.39 | 1973.6  | Down |
| Gjb1     | 333.105 | 2.15919 | 0.44408 | 4.86221 | 1.16E-06 | 1.41E-05 | 72.5626 | 233.815 | 59.2027 | 541.166 | 650.512 | 441.371 | Up   |
| Zmym3    | 2391.83 | 0.20038 | 0.09293 | 2.15624 | 0.03106  | 0.09415  | 2173.98 | 2360.19 | 2143.71 | 2615.63 | 2586.21 | 2471.28 | Up   |
| Itgb1bp2 | 361.442 | -3.2483 | 0.41678 | -7.7936 | 6.51E-15 | 3.24E-13 | 408.286 | 1127.87 | 425.878 | 72.5701 | 90.8182 | 43.2322 | Down |
| Ogt      | 13346.1 | -0.2405 | 0.08376 | -2.8716 | 0.00408  | 0.0183   | 14129.4 | 13844   | 15394.6 | 12192.8 | 12120   | 12395.6 | Down |
| Nhs12    | 950.891 | -0.4768 | 0.124   | -3.8452 | 0.00012  | 0.00089  | 1094.24 | 1011.92 | 1213.66 | 748.509 | 822.644 | 814.375 | Down |
| Ercc6l   | 86.6081 | 0.87442 | 0.37374 | 2.33963 | 0.0193   | 0.06495  | 69.6601 | 37.3721 | 76.3906 | 146.177 | 84.482  | 105.567 | Up   |
| Cited1   | 19.7511 | 1.97679 | 0.62302 | 3.17291 | 0.00151  | 0.00788  | 9.67501 | 8.62433 | 5.7293  | 18.6609 | 29.5687 | 46.2484 | Up   |
| Phka1    | 2988.95 | 0.89485 | 0.08777 | 10.1958 | 2.07E-24 | 2.61E-22 | 2155.59 | 2116.79 | 1999.52 | 3761.21 | 3883.01 | 4017.58 | Up   |
| Gm9109   | 1.91679 | -4.3355 | 2.1141  | -2.0508 | 0.04029  | NA       | 1.935   | 4.79129 | 4.77441 | 0       | 0       | 0       | Down |
| Gm6206   | 411.194 | 0.38709 | 0.17495 | 2.21257 | 0.02693  | 0.08447  | 382.163 | 330.599 | 356.171 | 448.898 | 550.189 | 399.144 | Up   |
| Rlim     | 4934.09 | 0.42894 | 0.10511 | 4.08091 | 4.49E-05 | 0.00037  | 4020.94 | 4040.02 | 4556.7  | 5441.72 | 6105.94 | 5439.22 | Up   |
| Gm24993  | 11.4829 | 1.47348 | 0.70056 | 2.10328 | 0.03544  | 0.10424  | 5.80501 | 4.79129 | 7.63906 | 22.8077 | 14.7844 | 13.0702 | Up   |
| Nexmif   | 815.815 | 1.39064 | 0.13443 | 10.3444 | 4.44E-25 | 5.91E-23 | 506.971 | 393.844 | 450.705 | 1158.01 | 1185.92 | 1199.44 | Up   |
| Abcb7    | 2236.02 | 0.26302 | 0.10873 | 2.41906 | 0.01556  | 0.05463  | 1907.91 | 2229.87 | 1960.37 | 2364.75 | 2571.42 | 2381.79 | Up   |
| Magee2   | 20.8438 | 1.44782 | 0.62359 | 2.32173 | 0.02025  | 0.06738  | 4.83751 | 18.2069 | 10.5037 | 32.1382 | 22.1765 | 37.1998 | Up   |
| 5530601H | 1414    | -0.242  | 0.11216 | -2.1577 | 0.03095  | 0.09394  | 1427.06 | 1531.3  | 1638.58 | 1204.66 | 1342.21 | 1340.2  | Down |
| Atrx     | 7962.96 | 0.36939 | 0.08284 | 4.45907 | 8.23E-06 | 8.27E-05 | 6830.56 | 6779.68 | 7237.06 | 8701.16 | 8859    | 9370.34 | Up   |
| Atp7a    | 291.166 | 0.7891  | 0.22562 | 3.4975  | 0.00047  | 0.00294  | 217.688 | 220.399 | 202.435 | 298.574 | 326.312 | 481.587 | Up   |
| Tlr13    | 951.018 | 1.90902 | 0.26616 | 7.17249 | 7.36E-13 | 2.69E-11 | 512.776 | 429.3   | 257.818 | 1381.94 | 1918.8  | 1205.48 | Up   |
| Cys1tr1  | 391.749 | 0.50527 | 0.17707 | 2.85344 | 0.00432  | 0.01919  | 307.665 | 329.641 | 334.209 | 371.144 | 512.172 | 495.663 | Up   |
| Rtl3     | 7.85638 | -4.4464 | 1.38942 | -3.2002 | 0.00137  | 0.00729  | 7.74001 | 23.9565 | 13.3684 | 2.07343 | 0       | 0       | Down |
| Lpar4    | 81.4877 | -0.5899 | 0.27451 | -2.1488 | 0.03165  | 0.09547  | 89.0101 | 107.325 | 97.3981 | 53.9092 | 73.9218 | 67.3619 | Down |
| P2ry10b  | 338.315 | 1.46375 | 0.2506  | 5.8409  | 5.19E-09 | 1.00E-07 | 210.915 | 196.443 | 132.729 | 462.375 | 627.279 | 400.15  | Up   |
| Itm2a    | 2031.14 | 1.38759 | 0.14214 | 9.76198 | 1.64E-22 | 1.80E-20 | 1181.32 | 1101.04 | 1087.61 | 2446.65 | 3041.35 | 3328.88 | Up   |
| 2610002N | 1545.78 | 0.25225 | 0.09062 | 2.78377 | 0.00537  | 0.023    | 1365.14 | 1431.64 | 1436.14 | 1640.08 | 1707.59 | 1694.1  | Up   |
| Gm379    | 36.1053 | 2.59521 | 0.46506 | 5.58034 | 2.40E-08 | 4.03E-07 | 15.48   | 6.70781 | 8.59395 | 64.2764 | 61.2495 | 60.3241 | Up   |
| Brwd3    | 1018.07 | 0.93745 | 0.10614 | 8.83197 | 1.03E-18 | 8.07E-17 | 721.756 | 685.155 | 688.471 | 1273.09 | 1409.79 | 1330.15 | Up   |
| Hmgcn5   | 1386.15 | -0.2269 | 0.10523 | -2.1559 | 0.03109  | 0.09418  | 1374.82 | 1553.34 | 1556.46 | 1284.49 | 1303.14 | 1244.69 | Down |
| Gm6377   | 255.459 | 1.11964 | 0.26444 | 4.23403 | 2.30E-05 | 0.00021  | 158.67  | 170.57  | 153.736 | 295.464 | 487.884 | 266.431 | Up   |
| Rps6ka6  | 172.183 | -0.8951 | 0.22718 | -3.9399 | 8.15E-05 | 0.00063  | 218.655 | 208.9   | 244.45  | 117.149 | 97.1543 | 146.789 | Down |
| Zfp711   | 140.29  | -0.8111 | 0.34787 | -2.3316 | 0.01972  | 0.06609  | 141.255 | 193.568 | 201.48  | 97.4513 | 60.1934 | 147.794 | Down |
| Nap1l3   | 281.282 | -0.3792 | 0.17292 | -2.1929 | 0.02832  | 0.08799  | 303.795 | 327.724 | 322.75  | 224.967 | 224.933 | 283.523 | Down |
| Pcdh19   | 298.587 | -0.6103 | 0.17626 | -3.4623 | 0.00054  | 0.00328  | 306.698 | 371.804 | 403.915 | 221.857 | 243.942 | 243.307 | Down |
| Tspan6   | 738.363 | -0.2789 | 0.12191 | -2.288  | 0.02213  | 0.07224  | 822.376 | 865.308 | 740.989 | 655.204 | 651.568 | 694.732 | Down |
| SrpX2    | 341.346 | -0.4066 | 0.17006 | -2.3908 | 0.01681  | 0.05822  | 377.326 | 401.51  | 388.637 | 335.896 | 247.11  | 297.599 | Down |
| Tmem35a  | 194.284 | -0.9014 | 0.314   | -2.8706 | 0.0041   | 0.01834  | 306.698 | 214.65  | 237.766 | 178.315 | 147.844 | 80.4321 | Down |
| Btk      | 815.257 | 0.96537 | 0.22527 | 4.28529 | 1.82E-05 | 0.00017  | 743.041 | 513.627 | 400.096 | 992.137 | 1186.97 | 1055.67 | Up   |
| Rpl36a   | 4289.95 | -0.3211 | 0.10609 | -3.0265 | 0.00247  | 0.01194  | 4954.58 | 4267.13 | 5074.25 | 3804.75 | 3942.14 | 3696.86 | Down |
| Gla      | 1049.34 | 1.11824 | 0.20567 | 5.43705 | 5.42E-08 | 8.54E-07 | 841.726 | 520.334 | 623.539 | 1346.69 | 1694.92 | 1268.82 | Up   |
| Armxc4   | 1972.56 | -0.6431 | 0.15333 | -4.1942 | 2.74E-05 | 0.00024  | 2485.51 | 1957.72 | 2772.03 | 1444.15 | 1529.12 | 1646.85 | Down |
| Armxc1   | 1437.78 | -0.4457 | 0.11939 | -3.7334 | 0.00019  | 0.00133  | 1668.94 | 1485.3  | 1820.01 | 1211.92 | 1266.17 | 1174.31 | Down |
| Armxc6   | 146.172 | -0.7855 | 0.20529 | -3.8263 | 0.00013  | 0.00096  | 195.435 | 165.779 | 193.841 | 111.965 | 102.434 | 107.578 | Down |
| Zmat1    | 820.489 | -0.5112 | 0.16318 | -3.1331 | 0.00173  | 0.00882  | 832.051 | 953.467 | 1107.66 | 598.185 | 668.464 | 763.099 | Down |
| Nxf7     | 28.3362 | 1.26292 | 0.59878 | 2.10917 | 0.03493  | 0.1031   | 25.155  | 8.62433 | 16.233  | 63.2397 | 30.6247 | 26.1404 | Up   |
| Bhlhb9   | 662.844 | -0.5993 | 0.1335  | -4.4886 | 7.17E-06 | 7.32E-05 | 895.906 | 730.193 | 769.636 | 524.578 | 525.901 | 530.852 | Down |
| Arxes2   | 699.338 | -1.1594 | 0.21012 | -5.5177 | 3.43E-08 | 5.60E-07 | 863.979 | 1200.7  | 833.613 | 523.542 | 420.298 | 353.901 | Down |
| Arxes1   | 29.6037 | -2.2532 | 0.63803 | -3.5316 | 0.00041  | 0.00263  | 38.7001 | 79.5355 | 28.6465 | 12.4406 | 4.2241  | 14.0756 | Down |
| Bex4     | 637.326 | -1.2805 | 0.2609  | -4.9082 | 9.19E-07 | 1.14E-05 | 1076.83 | 606.578 | 1025.54 | 455.118 | 279.847 | 380.042 | Down |
| Tceal8   | 2458.39 | -0.582  | 0.1192  | -4.8829 | 1.05E-06 | 1.29E-05 | 2726.42 | 2877.65 | 3238.96 | 2116.97 | 1802.64 | 1987.68 | Down |
| Tceal9   | 11963.7 | 1.2927  | 0.10219 | 12.6496 | 1.12E-36 | 4.04E-34 | 6494.84 | 7178.32 | 7133.93 | 18348.8 | 16940.8 | 15685.3 | Up   |
| Bex3     | 4017.27 | 1.77001 | 0.09473 | 18.6857 | 6.48E-78 | 3.49E-74 | 1768.59 | 1859.98 | 1836.24 | 6452.52 | 6434.36 | 5751.9  | Up   |
| Tceal1   | 811.455 | -0.4353 | 0.1307  | -3.3304 | 0.00087  | 0.00494  | 911.386 | 1026.3  | 861.304 | 711.187 | 634.671 | 723.889 | Down |
| Plp1     | 244.932 | -0.8686 | 0.25179 | -3.4496 | 0.00056  | 0.00342  | 215.753 | 391.928 | 341.848 | 175.205 | 167.908 | 176.951 | Down |
| Slc25a53 | 492.315 | -0.2743 | 0.13808 | -1.9863 | 0.047    | 0.13004  | 541.801 | 511.71  | 563.381 | 401.209 | 477.323 | 458.463 | Down |
| Nrk      | 7.25602 | 2.45666 | 1.03615 | 2.37095 | 0.01774  | 0.06074  | 1.935   | 0.95826 | 3.81953 | 12.4406 | 5.28013 | 19.1026 | Up   |
| Serpina7 | 100.228 | -1.4314 | 0.30223 | -4.7362 | 2.18E-06 | 2.49E-05 | 140.288 | 171.528 | 126.999 | 40.4319 | 51.7452 | 70.3781 | Down |
| 4930513C | 18.7756 | -1.524  | 0.60949 | -2.5004 | 0.0124   | 0.04562  | 25.155  | 36.4138 | 21.9623 | 10.3672 | 13.7283 | 5.027   | Down |
| Pwwp3b   | 270.047 | -1.3319 | 0.23487 | -5.6709 | 1.42E-08 | 2.49E-07 | 303.795 | 366.055 | 489.855 | 139.957 | 144.675 | 175.945 | Down |
| Platr21  | 308.281 | -0.7475 | 0.21006 | -3.5586 | 0.00037  | 0.0024   | 339.593 | 335.391 | 484.126 | 242.592 | 242.886 | 205.102 | Down |
| Radx     | 141.615 | 2.33817 | 0.29451 | 7.93925 | 2.03E-15 | 1.08E-13 | 53.2126 | 55.579  | 31.5111 | 199.049 | 285.127 | 225.21  | Up   |
| Rnf128   | 3535.9  | 1.85715 | 0.18271 | 10.1643 | 2.86E-24 | 3.55E-22 | 1535.42 | 1905.98 | 1147.77 | 5437.57 | 5946.48 | 5242.16 | Up   |
| Tbc1d8b  | 1190    | 0.69829 | 0.11842 | 5.89691 | 3.70E-09 | 7.37E-08 | 971.371 | 811.645 | 939.605 | 1471.1  | 1415.07 | 1531.23 | Up   |
| Cldn2    | 397.475 | 1.89306 | 0.29068 | 6.51256 | 7.39E-11 | 1.99E-09 | 147.06  | 226.149 | 132.729 | 554.643 | 464.651 | 859.618 | Up   |
| Morc4    | 232.696 | -0.7993 | 0.22158 | -3.6074 | 0.00031  | 0.00204  | 265.095 | 301.851 | 319.886 | 139.957 | 155.236 | 214.15  | Down |
| Nup62cl  | 347.752 | 0.94313 | 0.21231 | 4.44228 | 8.90E-06 | 8.85E-05 | 194.468 | 271.187 | 248.27  | 525.615 | 365.385 | 481.587 | Up   |
| Tsc22d3  | 17487.1 | -1.0866 | 0.16575 | -6.5557 | 5.54E-11 | 1.53E-09 | 24143   | 23767.7 | 23423.3 | 13737.5 | 8668.91 | 11182.1 | Down |
| Vsig1    | 131.401 | 2.06029 | 0.36826 | 5.59465 | 2.21E-08 | 3.73E-07 | 33.8626 | 56.5373 | 62.0674 | 278.877 | 128.835 | 228.226 | Up   |
| Psmid10  | 1567.69 | 0.32499 | 0.1036  | 3.13706 | 0.00171  | 0.00872  | 1425.13 | 1473.8  | 1276.68 | 1719.91 | 1756.17 | 1754.42 | Up   |
| Atg4a    | 1981.25 | 0.24771 | 0.09944 | 2.49114 | 0.01273  | 0.04654  | 1791.81 | 1937.6  | 1705.42 | 2120.08 | 2103.6  | 2228.97 | Up   |
| Col4a6   | 1031.64 | -1.2786 | 0.16063 | -7.9596 | 1.73E-15 | 9.26E-14 | 1307.09 | 1762.24 |         |         |         |         |      |

|           |         |         |         |         |          |          |         |         |         |         |         |         |      |
|-----------|---------|---------|---------|---------|----------|----------|---------|---------|---------|---------|---------|---------|------|
| Lhfp1     | 24.1467 | 2.71205 | 0.58168 | 4.66241 | 3.13E-06 | 3.46E-05 | 3.87001 | 7.66607 | 7.63906 | 53.9092 | 29.5687 | 42.2268 | Up   |
| Htr2c     | 299.355 | 2.388   | 0.72711 | 3.28424 | 0.00102  | 0.00568  | 178.02  | 82.4102 | 27.6916 | 440.604 | 664.24  | 403.166 | Up   |
| Il13ra2   | 8.3061  | 2.45767 | 0.90478 | 2.71632 | 0.0066   | 0.02716  | 1.935   | 3.83303 | 1.90977 | 17.6242 | 8.4482  | 16.0864 | Up   |
| Gm5946    | 7.30675 | -2.1012 | 0.98084 | -2.1423 | 0.03217  | 0.09663  | 11.61   | 16.2904 | 7.63906 | 5.18358 | 2.11205 | 1.0054  | Down |
| Pfkfb1    | 155.971 | -0.6852 | 0.32696 | -2.0956 | 0.03612  | 0.10588  | 156.735 | 284.603 | 135.593 | 108.855 | 140.451 | 109.589 | Down |
| Tro       | 112.286 | -0.834  | 0.34728 | -2.4016 | 0.01632  | 0.05679  | 94.8151 | 169.612 | 167.105 | 106.782 | 77.0899 | 58.3133 | Down |
| Maged2    | 2455.99 | -0.3544 | 0.11043 | -3.2098 | 0.00133  | 0.00709  | 2454.55 | 2857.53 | 2956.32 | 2155.33 | 2202.87 | 2109.33 | Down |
| Hsd17b10  | 3534.56 | 0.62643 | 0.09715 | 6.44835 | 1.13E-10 | 2.98E-09 | 2995.38 | 2730.08 | 2611.6  | 4295.11 | 4427.91 | 4147.28 | Up   |
| Kdm5c     | 4346.94 | 0.44177 | 0.09629 | 4.58778 | 4.48E-06 | 4.79E-05 | 3614.59 | 3456.44 | 3988.55 | 4875.67 | 5136.51 | 5009.91 | Up   |
| Kantr     | 806.19  | -0.2596 | 0.12018 | -2.1598 | 0.03079  | 0.09356  | 869.784 | 823.144 | 942.469 | 725.701 | 778.291 | 697.748 | Down |
| Gpr173    | 57.3939 | -0.7298 | 0.37204 | -1.9617 | 0.0498   | 0.1364   | 54.1801 | 86.2433 | 74.4809 | 38.3585 | 33.7928 | 57.3078 | Down |
| Mageh1    | 706.104 | -0.455  | 0.13986 | -3.2533 | 0.00114  | 0.00625  | 859.141 | 706.237 | 884.222 | 625.14  | 579.758 | 582.127 | Down |
| Rragb     | 218.267 | -0.3962 | 0.16482 | -2.4036 | 0.01623  | 0.05658  | 254.453 | 238.606 | 251.134 | 191.792 | 180.58  | 193.037 | Down |
| Kctd12b   | 816.622 | 0.66852 | 0.17938 | 3.72695 | 0.00019  | 0.00136  | 747.879 | 641.075 | 503.223 | 952.742 | 1127.84 | 926.98  | Up   |
| Sat1      | 16565.1 | 0.65552 | 0.10615 | 6.17556 | 6.59E-10 | 1.50E-08 | 11821.9 | 13928.3 | 12845.1 | 21101.3 | 20962.1 | 18731.6 | Up   |
| Prdx4     | 2215.92 | 0.2928  | 0.11583 | 2.52779 | 0.01148  | 0.04284  | 2034.66 | 1948.14 | 1992.84 | 2638.44 | 2144.79 | 2536.63 | Up   |
| Ptchd1    | 9.6016  | 2.00056 | 0.83027 | 2.40953 | 0.01597  | 0.05586  | 4.83751 | 3.83303 | 2.86465 | 12.4406 | 9.50423 | 24.1296 | Up   |
| Phex      | 319.111 | 1.97874 | 0.28174 | 7.02324 | 2.17E-12 | 7.38E-11 | 176.085 | 127.448 | 84.0297 | 486.22  | 425.578 | 615.305 | Up   |
| Mbtps2    | 1448.66 | 0.20626 | 0.1015  | 2.03215 | 0.04214  | 0.11944  | 1354.5  | 1361.69 | 1319.65 | 1441.04 | 1632.62 | 1582.5  | Up   |
| Smpx      | 1132.37 | -6.6589 | 1.74155 | -3.8235 | 0.00013  | 0.00097  | 1113.59 | 4423.32 | 1190.74 | 6.2203  | 0       | 60.3241 | Down |
| Klhl34    | 12.93   | -2.1506 | 0.95508 | -2.2518 | 0.02434  | 0.07794  | 19.35   | 29.706  | 14.3232 | 4.14686 | 0       | 10.054  | Down |
| Cnksr2    | 119.827 | -1.4955 | 0.46369 | -3.2253 | 0.00126  | 0.00678  | 166.41  | 185.902 | 178.563 | 70.4967 | 20.0645 | 97.5239 | Down |
| Rps6ka3   | 5116.4  | 0.42207 | 0.11058 | 3.81695 | 0.00014  | 0.00099  | 4170.9  | 4257.54 | 4691.34 | 5267.55 | 6206.26 | 6104.79 | Up   |
| Bclaf3    | 1195.27 | -0.3271 | 0.12154 | -2.691  | 0.00712  | 0.02895  | 1282.91 | 1254.36 | 1453.33 | 973.476 | 1084.54 | 1123.03 | Down |
| Sh3kbp1   | 2359.17 | -0.4992 | 0.21841 | -2.2855 | 0.02228  | 0.07262  | 2083.03 | 3789.91 | 2416.81 | 1791.44 | 2158.52 | 1915.29 | Down |
| Scml2     | 28.6267 | -1.025  | 0.46534 | -2.2028 | 0.02761  | 0.08615  | 36.7651 | 43.1216 | 35.3307 | 22.8077 | 11.6163 | 22.1188 | Down |
| Rai2      | 336.941 | -0.6917 | 0.18778 | -3.6838 | 0.00023  | 0.00157  | 421.831 | 448.465 | 378.134 | 241.555 | 310.471 | 221.188 | Down |
| Syap1     | 6013.99 | 0.3487  | 0.09285 | 3.75551 | 0.00017  | 0.00123  | 5042.62 | 5450.58 | 5378.86 | 6325    | 7136.62 | 6750.26 | Up   |
| Ctps2     | 2543.47 | 0.35142 | 0.0993  | 3.53914 | 0.0004   | 0.00256  | 2371.35 | 2158.96 | 2175.22 | 2882.07 | 2993.83 | 2679.39 | Up   |
| Ace2      | 1705.22 | -0.9083 | 0.22953 | -3.9571 | 7.59E-05 | 0.0006   | 2570.65 | 1989.34 | 2115.07 | 1246.13 | 790.963 | 1519.16 | Down |
| Bmx       | 784.186 | -0.935  | 0.14876 | -6.2849 | 3.28E-10 | 7.92E-09 | 1150.36 | 1004.26 | 934.83  | 583.671 | 470.987 | 561.014 | Down |
| Pir       | 2353.1  | -0.4866 | 0.21549 | -2.2581 | 0.02394  | 0.07697  | 3121.16 | 2864.24 | 2253.52 | 2150.15 | 1373.89 | 2355.65 | Down |
| Vegfd     | 3502.34 | -0.5003 | 0.15897 | -3.147  | 0.00165  | 0.00848  | 4697.22 | 4415.66 | 3197.9  | 3050.02 | 2829.09 | 2824.17 | Down |
| Piga      | 1004.51 | 0.52369 | 0.1359  | 3.85338 | 0.00012  | 0.00087  | 743.041 | 845.184 | 884.222 | 1051.23 | 1277.79 | 1225.58 | Up   |
| Fancb     | 256.036 | -0.4617 | 0.19735 | -2.3393 | 0.01932  | 0.06498  | 305.73  | 255.855 | 328.48  | 186.609 | 211.205 | 248.334 | Down |
| Gpm6b     | 4126.23 | -0.5928 | 0.12742 | -4.6521 | 3.29E-06 | 3.62E-05 | 4443.73 | 5407.45 | 5035.1  | 3067.64 | 3688.7  | 3114.73 | Down |
| Ofd1      | 1577.74 | 0.98237 | 0.1703  | 5.76865 | 7.99E-09 | 1.48E-07 | 1154.23 | 1015.75 | 1011.22 | 1669.11 | 2523.9  | 2092.24 | Up   |
| Rab9      | 3368.8  | 0.68365 | 0.10305 | 6.63406 | 3.27E-11 | 9.37E-10 | 2621.93 | 2465.6  | 2667.94 | 4169.67 | 4470.16 | 3817.51 | Up   |
| Tceanc    | 474.771 | 0.3874  | 0.14409 | 2.68861 | 0.00718  | 0.02909  | 443.116 | 377.554 | 413.464 | 526.652 | 587.15  | 500.69  | Up   |
| Egfl6     | 5266.72 | 1.44904 | 0.19333 | 7.49525 | 6.62E-14 | 2.91E-12 | 3689.08 | 2534.59 | 2247.79 | 6952.22 | 7524.18 | 8652.48 | Up   |
| Gm15226   | 4.12364 | 5.54539 | 1.68813 | 3.28493 | 0.00102  | 0.00567  | 0       | 0       | 0       | 5.18358 | 9.50423 | 10.054  | Up   |
| Rpl7a-ps1 | 148.495 | -0.5034 | 0.19629 | -2.5649 | 0.01032  | 0.03925  | 179.955 | 182.069 | 160.42  | 123.369 | 122.499 | 122.659 | Down |
| Tmsb4x    | 131885  | 0.3596  | 0.15445 | 2.32823 | 0.0199   | 0.06656  | 113561  | 103289  | 129749  | 155408  | 168667  | 120637  | Up   |
| Tlr8      | 382.538 | 2.41836 | 0.31008 | 7.79914 | 6.23E-15 | 3.12E-13 | 178.02  | 115.949 | 67.7967 | 545.313 | 727.601 | 660.548 | Up   |
| Tlr7      | 909.704 | 1.86226 | 0.34768 | 5.35619 | 8.50E-08 | 1.27E-06 | 546.638 | 431.216 | 199.571 | 1109.29 | 2023.34 | 1148.17 | Up   |
| Prps2     | 5318.81 | 0.47899 | 0.15904 | 3.0118  | 0.0026   | 0.01245  | 5355.12 | 4167.47 | 3809.03 | 5728.89 | 7012.01 | 5840.37 | Up   |
| Arhgap6   | 237.768 | -0.5668 | 0.17776 | -3.1888 | 0.00143  | 0.00753  | 274.77  | 311.434 | 265.457 | 171.058 | 203.813 | 200.075 | Down |
| BC022960  | 56.7774 | -0.8659 | 0.34268 | -2.527  | 0.01151  | 0.04291  | 87.0751 | 54.6207 | 78.3004 | 43.5421 | 35.9049 | 41.2214 | Down |

**Supplementary Table 2** DEGs between the Pten<sup>d/d</sup>ELF3<sup>OV</sup> vs Pten<sup>d/d</sup> groups

| gene_id  | baseMean | log2FoldC | lfcSE   | stat    | pvalue   | padj     | Ptendd1   | Ptendd2 | Ptendd3 | PtenddOV | PtenddOV | PtenddOV | change |
|----------|----------|-----------|---------|---------|----------|----------|-----------|---------|---------|----------|----------|----------|--------|
| Rp1      | 1625.55  | -0.9888   | 0.3159  | -3.1302 | 0.00175  | 0.01688  | 2664.44   | 1344.5  | 2476.53 | 1165.53  | 673.815  | 1428.49  | Down   |
| Sox17    | 4730.42  | 0.61845   | 0.15263 | 4.05209 | 5.08E-05 | 0.00106  | 3323.45   | 4289.98 | 3581.76 | 6197.83  | 6106.58  | 4882.91  | Up     |
| Rgs20    | 51.2066  | -1.8771   | 0.53789 | -3.4898 | 0.00048  | 0.00629  | 68.5449   | 39.4572 | 133.524 | 16.3154  | 19.5757  | 29.8224  | Down   |
| Alkal1   | 1171.76  | 0.79955   | 0.15188 | 5.26434 | 1.41E-07 | 7.46E-06 | 872.479   | 978.538 | 714.402 | 1595.85  | 1452.72  | 1416.56  | Up     |
| Adhfe1   | 422.573  | -0.434    | 0.18905 | -2.2959 | 0.02168  | 0.10773  | 555.214   | 516.889 | 384.978 | 340.585  | 344.12   | 393.655  | Down   |
| Sgk3     | 1476.66  | 0.39711   | 0.13551 | 2.93053 | 0.00338  | 0.0281   | 1183.87   | 1463.86 | 1176.38 | 1628.48  | 1799.93  | 1607.42  | Up     |
| Snhg6    | 257.629  | -0.3835   | 0.17915 | -2.1406 | 0.03231  | 0.14237  | 297.681   | 270.282 | 307.008 | 259.008  | 205.029  | 206.768  | Down   |
| Ppp1r42  | 292.419  | -1.1795   | 0.37391 | -3.1546 | 0.00161  | 0.01583  | 500.378   | 201.232 | 515.578 | 203.943  | 123.636  | 209.751  | Down   |
| Cops5    | 3610.11  | -0.2358   | 0.11889 | -1.9834 | 0.04732  | 0.18428  | 3943.29   | 3626.12 | 4144.12 | 3583.28  | 2963.14  | 3400.74  | Down   |
| Cspp1    | 3188.79  | -0.3897   | 0.19576 | -1.9905 | 0.04653  | 0.18212  | 3780.74   | 2761.02 | 4308.83 | 2886.81  | 2304.78  | 3090.59  | Down   |
| A830018L | 308.334  | -0.9297   | 0.27445 | -3.3874 | 0.00071  | 0.00834  | 421.061   | 310.725 | 481.466 | 200.884  | 154.545  | 281.324  | Down   |
| Eya1     | 498.688  | -0.736    | 0.25959 | -2.8352 | 0.00458  | 0.03511  | 779.453   | 698.392 | 391.8   | 347.723  | 378.12   | 396.637  | Down   |
| 4930444P | 546.156  | -1.3795   | 0.32368 | -4.262  | 2.03E-05 | 0.0005   | 1057.55   | 467.568 | 842.078 | 350.782  | 206.06   | 352.898  | Down   |
| Ly96     | 403.038  | 0.38197   | 0.19265 | 1.98272 | 0.0474   | 0.18447  | 389.727   | 354.128 | 306.033 | 457.852  | 534.725  | 375.762  | Up     |
| Il17a    | 14.4037  | 4.39884   | 1.5102  | 2.91276 | 0.00358  | 0.02934  | 1.95843   | 0       | 1.94925 | 39.7689  | 0        | 42.7454  | Up     |
| Il17f    | 14.2294  | 2.51275   | 1.06845 | 2.35178 | 0.01868  | 0.0977   | 7.8337    | 1.97286 | 2.92388 | 39.7689  | 2.0606   | 30.8164  | Up     |
| Mcm3     | 1159.78  | 0.35522   | 0.12931 | 2.74701 | 0.00601  | 0.04281  | 913.605   | 992.348 | 1147.14 | 1257.31  | 1358.96  | 1289.32  | Up     |
| Effhc1   | 2816.22  | -0.8527   | 0.26986 | -3.1597 | 0.00158  | 0.01562  | 4159.7    | 2556.83 | 4158.73 | 2188.31  | 1317.75  | 2516.01  | Down   |
| Gsta3    | 645.954  | -0.8468   | 0.30142 | -2.8093 | 0.00497  | 0.03716  | 699.158   | 596.79  | 1194.89 | 497.621  | 326.605  | 560.66   | Down   |
| Ogfrl1   | 2340.83  | 0.96604   | 0.11833 | 8.16386 | 3.24E-16 | 1.10E-13 | 1410.07   | 1579.27 | 1766.02 | 3059.14  | 3155.8   | 3074.68  | Up     |
| Smap1    | 764.536  | 0.2906    | 0.11591 | 2.507   | 0.01218  | 0.07136  | 700.137   | 710.229 | 653     | 799.456  | 895.329  | 829.061  | Up     |
| Gm28437  | 1804.82  | 0.3457    | 0.16993 | 2.03437 | 0.04191  | 0.17006  | 1452.17   | 1621.69 | 1694.88 | 1718.22  | 2484.05  | 1857.93  | Up     |
| Gm9898   | 21.1125  | -1.0891   | 0.49716 | -2.1906 | 0.02848  | 0.13045  | 27.418    | 24.6607 | 34.112  | 14.276   | 10.303   | 15.9053  | Down   |
| 4931428L | 311.727  | -0.9841   | 0.27833 | -3.5357 | 0.00041  | 0.0055   | 409.311   | 303.82  | 529.223 | 252.889  | 151.454  | 223.668  | Down   |
| Gm37724  | 5.21138  | 2.80528   | 1.16036 | 2.41759 | 0.01562  | NA       | 1.95843   | 0       | 1.94925 | 9.17743  | 8.24239  | 9.94079  | Up     |
| Rab23    | 1938.28  | -0.5697   | 0.19133 | -2.9776 | 0.00291  | 0.02507  | 2476.43   | 1821.94 | 2650.01 | 1612.17  | 1284.78  | 1784.37  | Down   |
| Bag2     | 1129.84  | -0.6028   | 0.26776 | -2.2513 | 0.02436  | 0.11669  | 1624.51   | 826.628 | 1636.4  | 1002.38  | 739.754  | 949.345  | Down   |
| Bend6    | 160.685  | 1.32114   | 0.28289 | 4.67021 | 3.01E-06 | 0.0001   | 73.441    | 113.439 | 88.6911 | 175.391  | 288.484  | 224.662  | Up     |
| Ccdc115  | 1155.18  | 0.41525   | 0.15694 | 2.64591 | 0.00815  | 0.05324  | 1034.05   | 1110.72 | 825.509 | 1452.07  | 1206.48  | 1302.24  | Up     |
| Ptpn18   | 933.549  | 0.49358   | 0.1295  | 3.81145 | 0.00014  | 0.00241  | 853.874   | 696.419 | 775.803 | 1154.32  | 1089.03  | 1031.85  | Up     |
| Fam168b  | 7921.8   | 0.2115    | 0.0844  | 2.50594 | 0.01221  | 0.07151  | 7590.86   | 7534.35 | 6901.34 | 8388.17  | 8597.84  | 8518.26  | Up     |
| Plekhh2  | 10401.1  | 0.51426   | 0.12286 | 4.1858  | 2.84E-05 | 0.00065  | 8974.48   | 9364.18 | 7361.36 | 12670    | 12202.9  | 11833.5  | Up     |
| Uggt1    | 5364.94  | 0.20696   | 0.08173 | 2.53233 | 0.01133  | 0.06771  | 4916.63   | 5193.55 | 4832.2  | 5629.85  | 5898.46  | 5718.93  | Up     |
| Neur13   | 1889.9   | 0.43633   | 0.21233 | 2.05489 | 0.03989  | 0.16477  | 1477.63   | 2137.59 | 1203.66 | 2063.9   | 2124.48  | 2332.11  | Up     |
| Cnnm4    | 608.627  | -0.3916   | 0.15203 | -2.5756 | 0.01001  | 0.06193  | 781.412   | 595.803 | 694.909 | 559.823  | 505.877  | 513.939  | Down   |
| Fam178b  | 78.7025  | -0.6375   | 0.31104 | -2.0494 | 0.04042  | 0.16592  | 98.9005   | 117.385 | 71.1478 | 71.38    | 58.727   | 54.6743  | Down   |
| Zap70    | 553.48   | -0.671    | 0.22074 | -3.0399 | 0.00237  | 0.02148  | 650.197   | 642.166 | 747.539 | 476.207  | 298.787  | 505.986  | Down   |
| Vwa3b    | 1277.95  | -0.8885   | 0.3036  | -2.9265 | 0.00343  | 0.02835  | 1951.57   | 1122.56 | 1904.42 | 989.123  | 541.937  | 1158.1   | Down   |
| Mgat4a   | 1901.29  | 0.32548   | 0.13905 | 2.3407  | 0.01925  | 0.09967  | 1807.63   | 1405.66 | 1849.84 | 2087.36  | 2081.2   | 2176.04  | Up     |
| Tsga10   | 2200.89  | -0.6774   | 0.23842 | -2.8411 | 0.0045   | 0.03457  | 2969.95   | 1890.99 | 3264.03 | 1666.21  | 1342.48  | 2071.66  | Down   |
| Aff3     | 1712.65  | -0.2998   | 0.117   | -2.5622 | 0.0104   | 0.0637   | 1782.17   | 1878.16 | 2009.68 | 1471.45  | 1445.51  | 1688.94  | Down   |
| Npas2    | 753.999  | -2.322    | 0.33606 | -6.9094 | 4.87E-12 | 6.67E-10 | 1517.78   | 1624.65 | 627.66  | 221.278  | 220.484  | 312.141  | Down   |
| Rnf149   | 2955.05  | 0.72603   | 0.12975 | 5.59572 | 2.20E-08 | 1.46E-06 | 2243.38   | 2411.82 | 2025.28 | 3243.71  | 3948.1   | 3858.02  | Up     |
| Il1r1    | 2620.76  | -0.2963   | 0.12796 | -2.3154 | 0.02059  | 0.1044   | 3041.43   | 3083.58 | 2541.83 | 2145.48  | 2502.59  | 2409.65  | Down   |
| Il1r1    | 159.401  | 0.64621   | 0.31623 | 2.04344 | 0.04101  | 0.16746  | 143.944   | 154.869 | 74.0717 | 229.436  | 175.151  | 178.934  | Up     |
| Il18rap  | 727.935  | 0.85703   | 0.15625 | 5.48514 | 4.13E-08 | 2.55E-06 | 482.752   | 537.604 | 533.121 | 967.709  | 1058.12  | 788.304  | Up     |
| Slc9a4   | 823.918  | 1.54044   | 0.24609 | 6.25956 | 3.86E-10 | 3.65E-08 | 547.38    | 404.436 | 312.855 | 1229.78  | 1488.78  | 960.28   | Up     |
| Mrps9    | 2123.5   | -0.3238   | 0.11357 | -2.8509 | 0.00436  | 0.03379  | 2232.61   | 2610.09 | 2239.69 | 1823.25  | 1953.39  | 1849.98  | Down   |
| Fhl2     | 828.739  | -1.2826   | 0.64188 | -1.9981 | 0.0457   | 0.1798   | 1779.23   | 497.161 | 1247.52 | 534.331  | 244.181  | 670.009  | Down   |
| Nck2     | 2183.45  | -0.3239   | 0.10746 | -3.014  | 0.00258  | 0.02296  | 2506.78   | 2211.58 | 2564.24 | 1922.16  | 1871.02  | 2024.94  | Down   |
| Col5a2   | 2942.34  | 0.4926    | 0.16806 | 2.93113 | 0.00338  | 0.02809  | 2491.12   | 2891.23 | 1952.18 | 3673.01  | 3537.01  | 3109.48  | Up     |
| Dnah7b   | 952.12   | -1.1209   | 0.28645 | -3.9132 | 9.11E-05 | 0.00172  | 1429.65   | 935.135 | 1548.68 | 657.716  | 377.089  | 764.446  | Down   |
| Dnah7c   | 935.287  | -1.8088   | 0.29405 | -6.1512 | 7.69E-10 | 6.96E-08 | 2101.39   | 1083.1  | 1181.25 | 424.201  | 301.877  | 519.903  | Down   |
| Tmeff2   | 517.396  | -0.7844   | 0.23581 | -3.3265 | 0.00088  | 0.0099   | 682.511   | 802.954 | 478.542 | 353.841  | 458.483  | 328.046  | Down   |
| Nabp1    | 3562.66  | 1.00603   | 0.18023 | 5.58184 | 2.38E-08 | 1.55E-06 | 2460.76   | 2405.9  | 2238.72 | 5019.04  | 5673.85  | 3577.69  | Up     |
| Gm553    | 101.01   | -0.7114   | 0.25915 | -2.745  | 0.00605  | 0.04302  | 130.235   | 124.29  | 121.828 | 77.4983  | 59.7573  | 92.4493  | Down   |
| Gm5527   | 31.2563  | -1.1233   | 0.52178 | -2.1528 | 0.03133  | 0.13895  | 26.4387   | 59.1858 | 42.8836 | 14.276   | 28.8484  | 15.9053  | Down   |
| Osgepl1  | 575.483  | -0.3704   | 0.16002 | -2.3146 | 0.02064  | 0.10448  | 538.567   | 726.999 | 681.264 | 492.522  | 525.452  | 488.093  | Down   |
| Dnah7a   | 1264.56  | -0.9576   | 0.2769  | -3.4581 | 0.00054  | 0.00687  | 1795.88   | 1163    | 2049.64 | 898.369  | 580.058  | 1100.44  | Down   |
| Hecw2    | 2199.2   | -0.387    | 0.18905 | -2.047  | 0.04066  | 0.1665   | 3114.88   | 2030.07 | 2332.28 | 1661.12  | 1923.57  | 2133.29  | Down   |
| Pgap1    | 623.644  | 0.52969   | 0.14476 | 3.65912 | 0.00025  | 0.00384  | 445.542   | 577.061 | 508.755 | 727.057  | 715.027  | 768.423  | Up     |
| Ankrd44  | 4762.28  | -0.3836   | 0.10984 | -3.4924 | 0.00048  | 0.00624  | 5375.88   | 5264.57 | 5534.91 | 3745.41  | 4085.13  | 4567.79  | Down   |
| Hspe1    | 2211.68  | -0.3432   | 0.14935 | -2.2983 | 0.02154  | 0.10725  | 2729.07   | 2085.31 | 2606.15 | 2138.34  | 1960.66  | 1750.57  | Down   |
| Rftn2    | 938.89   | -0.6764   | 0.20482 | -3.3022 | 0.00096  | 0.01064  | 1122.18   | 1455.97 | 886.911 | 691.367  | 811.875  | 665.039  | Down   |
| Gm10561  | 101.907  | -1.0609   | 0.38314 | -2.7689 | 0.00562  | 0.04074  | 143.944   | 193.34  | 76.0209 | 61.1829  | 78.3027  | 58.6506  | Down   |
| Spats2l  | 1230.73  | -0.3256   | 0.15445 | -2.1082 | 0.03501  | 0.15062  | 1562.82   | 1171.88 | 1372.28 | 1020.73  | 1218.84  | 1037.82  | Down   |
| Aox1     | 4629.92  | -0.6052   | 0.18525 | -3.2667 | 0.00109  | 0.01178  | 4921.52   | 4700.34 | 7139.14 | 3732.16  | 3302.11  | 3984.27  | Down   |
| Aox3     | 5462.49  | -0.6092   | 0.2211  | -2.7552 | 0.00587  | 0.04202  | 6765.38   | 5524.01 | 7507.55 | 5020.06  | 2978.59  | 4979.34  | Down   |
| Flacc1   | 131.274  | -0.7326   | 0.22682 | -3.2299 | 0.00124  | 0.01305  | 154.716   | 147.964 | 189.078 | 100.952  | 87.5754  | 107.36   | Down   |
| Casp8    | 3648.53  | 0.44511   | 0.15324 | 2.90462 | 0.00368  | 0.02989  | 2934.7    | 3628.09 | 2707.51 | 4095.18  | 4707.43  | 3818.26  | Up     |
| Tmem237  | 1334.68  | -0.393    | 0.12745 | -3.0839 | 0.00204  | 0.01909  | 1434.55   | 1437.23 | 1674.41 | 1062.54  | 1148.78  | 1250.55  | Down   |
| Mpp4     | 23.1054  | -1.5289   | 0.59833 | -2.5554 | 0.01061  | 0.06467  | 31.3348   | 35.5115 | 36.0612 | 18.3549  | 13.3939  | 3.97631  | Down   |
| Als2     | 419.824  | 0.45321   | 0.13599 | 3.33269 | 0.00086  | 0.00974  | 354.475   | 351.169 | 357.688 | 452.753  | 475.998  | 526.862  | Up     |
| Gm26813  | 90.3033  | 0.87446   | 0.37672 | 2.32122 | 0.02027  | 0.10319  | 50.9191   | 74.9687 | 65.3    | 124.405  | 157.636  | 68.5914  | Up     |
| Gm973    | 215.305  | -1.1914   | 0.48239 | -2.4698 | 0.01352  | 0.07722  | 384.831   | 168.679 | 345.018 | 92.7941  | 64.9088  | 235.597  | Down   |
| Ica1l    | 209.403  | -0.8581   | 0.25086 | -3.4208 | 0.00062  | 0.00767  | 269.284</ |         |         |          |          |          |        |

|          |         |         |         |         |          |          |         |         |         |         |         |         |      |
|----------|---------|---------|---------|---------|----------|----------|---------|---------|---------|---------|---------|---------|------|
| Mdh1b    | 666.874 | -1.3022 | 0.32974 | -3.9491 | 7.85E-05 | 0.00152  | 1231.85 | 578.048 | 1037    | 424.201 | 240.06  | 490.081 | Down |
| Fzd5     | 1659.53 | 0.25297 | 0.11703 | 2.16167 | 0.03064  | 0.13706  | 1419.86 | 1681.86 | 1441.47 | 1852.82 | 1848.36 | 1712.8  | Up   |
| Pikfyve  | 1872.74 | 0.24543 | 0.09702 | 2.52959 | 0.01142  | 0.06802  | 1642.14 | 1749.93 | 1749.46 | 1914    | 2087.38 | 2093.53 | Up   |
| Rpe      | 2411.03 | 0.25714 | 0.08941 | 2.87578 | 0.00403  | 0.03185  | 2216.94 | 2219.47 | 2153.93 | 2511.56 | 2608.72 | 2755.59 | Up   |
| Erbp4    | 50.4863 | -2.3514 | 0.68657 | -3.4248 | 0.00062  | 0.00758  | 89.1084 | 37.4843 | 126.702 | 30.5914 | 4.12119 | 14.9112 | Down |
| Spag16   | 4798.94 | -0.6987 | 0.28734 | -2.4315 | 0.01503  | 0.08356  | 7073.83 | 3684.31 | 7058.25 | 3721.96 | 2559.26 | 4696.03 | Down |
| Fn1      | 29144.7 | 0.77098 | 0.21534 | 3.58021 | 0.00034  | 0.00484  | 19677.3 | 28153.7 | 16781.1 | 33325.3 | 44332.7 | 32597.8 | Up   |
| Mreg     | 439.031 | 1.08643 | 0.17894 | 6.07165 | 1.27E-09 | 1.10E-07 | 253.616 | 334.4   | 255.352 | 548.607 | 667.633 | 574.577 | Up   |
| Tmem169  | 8.24346 | 1.67974 | 0.82081 | 2.04645 | 0.04071  | 0.16655  | 2.93764 | 3.94572 | 4.87314 | 12.2366 | 17.5151 | 7.95263 | Up   |
| Igfbp2   | 7871.73 | -1.4301 | 0.22748 | -6.2868 | 3.24E-10 | 3.10E-08 | 8503.48 | 11881.5 | 14061.9 | 4775.32 | 4830.04 | 3178.07 | Down |
| Igfbp5   | 20121   | -0.974  | 0.19118 | -5.0948 | 3.49E-07 | 1.65E-05 | 25822.8 | 21612.7 | 32564.2 | 15316.1 | 11008.7 | 14401.2 | Down |
| Pinc     | 3.11342 | -5.0599 | 1.95044 | -2.5942 | 0.00948  | NA       | 1.95843 | 12.8236 | 3.89851 | 0       | 0       | 0       | Down |
| C530043A | 795.824 | -2.7416 | 0.76123 | -3.6015 | 0.00032  | 0.00455  | 1942.76 | 629.342 | 1581.82 | 162.135 | 74.1815 | 384.708 | Down |
| Gm29186  | 34.3438 | -2.074  | 0.45843 | -4.5241 | 6.06E-06 | 0.00018  | 69.5241 | 42.4165 | 54.5791 | 9.17743 | 15.4545 | 14.9112 | Down |
| 6030407C | 18.9939 | -1.2625 | 0.52907 | -2.3863 | 0.01702  | 0.09177  | 26.4387 | 31.5657 | 22.4164 | 9.17743 | 14.4242 | 9.94079 | Down |
| Rufy4    | 302.878 | 2.48487 | 0.19968 | 12.4444 | 1.50E-35 | 4.06E-32 | 80.2954 | 97.6565 | 97.4627 | 464.99  | 601.694 | 475.17  | Up   |
| Cxcr1    | 364.215 | 3.87703 | 0.33258 | 11.6576 | 2.10E-31 | 3.97E-28 | 51.8983 | 52.2808 | 35.0866 | 521.074 | 1018.97 | 505.986 | Up   |
| Arpc2    | 20047.8 | 0.31563 | 0.12473 | 2.53053 | 0.01139  | 0.06793  | 17386.9 | 19541.2 | 16662.2 | 21998.3 | 24748.8 | 19949.2 | Up   |
| Pnk4     | 1899.97 | -0.3444 | 0.12382 | -2.7815 | 0.00541  | 0.03957  | 1966.26 | 2323.04 | 2087.65 | 1826.31 | 1656.72 | 1539.83 | Down |
| Catip    | 2389.68 | -0.9914 | 0.32576 | -3.0433 | 0.00234  | 0.02129  | 3617.21 | 1684.82 | 4237.68 | 1887.49 | 1108.6  | 1802.26 | Down |
| Slc11a1  | 673.702 | 0.67689 | 0.21507 | 3.14733 | 0.00165  | 0.01612  | 406.373 | 654.989 | 494.136 | 704.623 | 953.026 | 829.061 | Up   |
| Vil1     | 153.538 | 1.14204 | 0.31785 | 3.59305 | 0.00033  | 0.00466  | 57.7736 | 122.317 | 107.209 | 222.298 | 172.06  | 239.573 | Up   |
| Stk36    | 1793.02 | -0.8749 | 0.23126 | -3.7833 | 0.00015  | 0.00262  | 2611.56 | 1604.92 | 2745.53 | 1256.29 | 1044.72 | 1495.09 | Down |
| Cfap65   | 2497.19 | -0.6782 | 0.33983 | -1.9957 | 0.04597  | 0.18058  | 3670.09 | 1806.15 | 3744.52 | 2033.31 | 1110.66 | 2618.4  | Down |
| Ihh      | 101.276 | -1.4718 | 0.287   | -5.1281 | 2.93E-07 | 1.43E-05 | 150.799 | 130.209 | 165.687 | 62.2026 | 38.121  | 60.6388 | Down |
| Slc23a3  | 122.448 | 0.78843 | 0.32535 | 2.42334 | 0.01538  | 0.08497  | 102.817 | 68.0636 | 98.4374 | 150.918 | 207.09  | 107.36  | Up   |
| Atg9a    | 710.216 | 0.4021  | 0.11034 | 3.64411 | 0.00027  | 0.004    | 647.26  | 594.817 | 593.548 | 812.713 | 807.754 | 805.204 | Up   |
| Tuba4a   | 4065.95 | 0.28766 | 0.08165 | 3.52299 | 0.00043  | 0.00567  | 3817.95 | 3534.38 | 3633.41 | 4478.59 | 4511.68 | 4419.67 | Up   |
| Dnajb2   | 5428.61 | -0.348  | 0.11555 | -3.0114 | 0.0026   | 0.02304  | 6562.68 | 5609.83 | 6068.03 | 4961.93 | 4326.22 | 5042.96 | Down |
| Obsl1    | 575.875 | -0.5754 | 0.22142 | -2.5987 | 0.00936  | 0.05876  | 732.451 | 482.364 | 852.799 | 464.99  | 456.422 | 466.223 | Down |
| Inha     | 379.941 | -0.9587 | 0.33655 | -2.8486 | 0.00439  | 0.03395  | 365.246 | 382.735 | 757.285 | 255.948 | 184.423 | 334.01  | Down |
| Stk11ip  | 2049.74 | -0.3664 | 0.11561 | -3.1688 | 0.00153  | 0.01526  | 2389.28 | 2075.45 | 2460.93 | 1854.86 | 1834.96 | 1682.97 | Down |
| Slc4a3   | 971.963 | -0.6289 | 0.16504 | -3.8105 | 0.00014  | 0.00242  | 1179.95 | 978.538 | 1383    | 704.623 | 823.208 | 762.458 | Down |
| Epha4    | 875.244 | 0.5771  | 0.1606  | 3.59351 | 0.00033  | 0.00466  | 680.553 | 817.75  | 609.142 | 1005.44 | 1168.36 | 970.221 | Up   |
| Sgpp2    | 967.347 | 0.90721 | 0.13654 | 6.64439 | 3.04E-11 | 3.88E-09 | 712.867 | 710.229 | 595.497 | 1143.1  | 1304.36 | 1338.03 | Up   |
| Farsb    | 3408.16 | 0.28021 | 0.09721 | 2.88252 | 0.00395  | 0.03137  | 3269.59 | 3124.02 | 2841.04 | 3717.88 | 3820.35 | 3676.1  | Up   |
| Mogat1   | 250.409 | 2.25219 | 0.30806 | 7.31079 | 2.66E-13 | 4.83E-11 | 71.4825 | 91.738  | 97.4627 | 485.384 | 251.393 | 504.992 | Up   |
| 5730419F | 10.6538 | -3.005  | 1.03482 | -2.9039 | 0.00369  | 0.02995  | 6.85449 | 24.6607 | 25.3403 | 0       | 3.0909  | 3.97631 | Down |
| Acs13    | 3563.69 | -0.4882 | 0.23895 | -2.0433 | 0.04102  | 0.16747  | 4881.38 | 2907.99 | 4693.81 | 2966.35 | 2289.32 | 3643.3  | Down |
| Ap1s3    | 848.869 | 0.52934 | 0.17611 | 3.00569 | 0.00265  | 0.02337  | 668.802 | 798.022 | 617.914 | 1027.87 | 831.451 | 1149.15 | Up   |
| Mrpl44   | 1148.78 | -0.3081 | 0.10274 | -2.9984 | 0.00271  | 0.0238   | 1291.58 | 1288.28 | 1232.9  | 1040.11 | 1073.57 | 966.244 | Down |
| Serpine2 | 7613.49 | -0.2016 | 0.08272 | -2.4374 | 0.01479  | 0.08265  | 8110.82 | 7965.42 | 8357.43 | 7154.32 | 7349.12 | 6743.83 | Down |
| 2310015K | 1.96259 | -4.3943 | 2.07674 | -2.116  | 0.03435  | NA       | 1.95843 | 5.91858 | 3.89851 | 0       | 0       | 0       | Down |
| Dock10   | 3356.29 | 0.53977 | 0.17473 | 3.08919 | 0.00201  | 0.01884  | 2506.78 | 3140.79 | 2559.37 | 3270.23 | 4782.65 | 3877.9  | Up   |
| Daw1     | 1105.56 | -0.9763 | 0.32654 | -2.99   | 0.00279  | 0.0243   | 1696.98 | 929.217 | 1771.87 | 927.941 | 428.604 | 878.765 | Down |
| Fbxo36   | 1594.64 | -1.0576 | 0.22147 | -4.7754 | 1.79E-06 | 6.53E-05 | 2523.43 | 1553.63 | 2385.89 | 1111.49 | 827.33  | 1166.05 | Down |
| Gm29284  | 59.7288 | -1.5264 | 0.47623 | -3.2051 | 0.00135  | 0.01388  | 72.4617 | 47.3486 | 146.194 | 32.6309 | 30.909  | 28.8283 | Down |
| C130026L | 516.168 | -0.9867 | 0.29352 | -3.3616 | 0.00077  | 0.00897  | 609.07  | 493.215 | 956.109 | 350.782 | 252.423 | 435.406 | Down |
| AC14780E | 98.107  | -0.5981 | 0.28314 | -2.1124 | 0.03465  | 0.14947  | 135.131 | 85.8194 | 133.524 | 79.5378 | 72.1209 | 82.5085 | Down |
| A630001C | 1007.39 | 0.36516 | 0.14871 | 2.45542 | 0.01407  | 0.07957  | 727.555 | 976.565 | 937.591 | 1124.75 | 1171.45 | 1106.41 | Up   |
| Gm28100  | 9.56673 | -1.8793 | 0.95757 | -1.9626 | 0.0497   | 0.19018  | 11.7506 | 17.7557 | 15.594  | 6.11829 | 6.18179 | 0       | Down |
| Gm18180  | 76.5214 | -2.0171 | 0.81424 | -2.4773 | 0.01324  | 0.07593  | 152.757 | 89.7651 | 125.727 | 5.09857 | 8.24239 | 77.5381 | Down |
| Spata3   | 27.384  | -2.3929 | 0.62671 | -3.8182 | 0.00013  | 0.00236  | 73.441  | 24.6607 | 39.9597 | 7.138   | 6.18179 | 12.923  | Down |
| 2810459N | 157.36  | 0.88948 | 0.27877 | 3.19067 | 0.00142  | 0.01433  | 83.2331 | 94.6972 | 153.016 | 209.042 | 214.302 | 189.869 | Up   |
| Psm1d1   | 4941.91 | 0.26303 | 0.07667 | 3.43075 | 0.0006   | 0.00746  | 4616.01 | 4451.76 | 4410.19 | 5297.42 | 5482.22 | 5393.87 | Up   |
| Armc9    | 695.517 | -0.241  | 0.11727 | -2.0548 | 0.0399   | 0.16477  | 758.89  | 702.338 | 799.194 | 628.144 | 627.452 | 657.086 | Down |
| B3gnt7   | 1839.99 | 1.71377 | 0.15889 | 10.7857 | 4.02E-27 | 5.85E-24 | 895.98  | 819.723 | 863.52  | 2950.04 | 3238.23 | 2272.46 | Up   |
| Tex44    | 10.9508 | -3.5837 | 0.99761 | -3.5923 | 0.00033  | 0.00467  | 22.5219 | 10.8507 | 27.2896 | 0       | 2.0606  | 2.98224 | Down |
| Efh1d1   | 276.397 | 2.16175 | 0.20321 | 10.6383 | 1.98E-26 | 2.49E-23 | 111.63  | 107.521 | 83.8179 | 387.492 | 471.877 | 496.045 | Up   |
| Ngef     | 759.419 | -0.945  | 0.25709 | -3.6758 | 0.00024  | 0.00366  | 920.46  | 687.541 | 1390.79 | 585.316 | 486.301 | 486.104 | Down |
| Neu2     | 132.312 | -1.0086 | 0.35374 | -2.8514 | 0.00435  | 0.03377  | 173.321 | 103.575 | 253.403 | 76.4786 | 90.6663 | 96.4256 | Down |
| Inpp5d   | 2764    | 0.29347 | 0.10992 | 2.66987 | 0.00759  | 0.05041  | 2531.26 | 2298.38 | 2621.75 | 2908.23 | 3293.86 | 2930.54 | Up   |
| Sag      | 88.9882 | -1.0065 | 0.28277 | -3.5594 | 0.00037  | 0.0051   | 121.422 | 96.6701 | 138.397 | 48.9463 | 63.8785 | 64.6151 | Down |
| Dgk1d    | 5889.28 | 0.28655 | 0.11386 | 2.51658 | 0.01185  | 0.06991  | 4721.76 | 5592.07 | 5605.08 | 6556.77 | 6775.24 | 6084.75 | Up   |
| Usp40    | 1663.33 | -0.2715 | 0.10192 | -2.6635 | 0.00773  | 0.05107  | 1721.46 | 1869.28 | 1867.39 | 1415.36 | 1554.72 | 1551.76 | Down |
| Spp2     | 391.687 | -0.8948 | 0.35763 | -2.502  | 0.01235  | 0.07199  | 626.696 | 332.427 | 569.182 | 293.678 | 149.393 | 378.744 | Down |
| Gm29538  | 322.575 | -1.5056 | 0.26136 | -5.7606 | 8.38E-09 | 6.29E-07 | 493.523 | 353.142 | 584.776 | 180.49  | 125.696 | 197.822 | Down |
| Gm28888  | 9.52821 | -1.7464 | 0.79015 | -2.2102 | 0.02709  | 0.12556  | 12.7298 | 12.8236 | 18.5179 | 4.07886 | 2.0606  | 6.95855 | Down |
| Gm19589  | 13.7373 | -2.8439 | 0.94066 | -3.0233 | 0.0025   | 0.02243  | 27.418  | 10.8507 | 34.112  | 4.07886 | 0       | 5.96447 | Down |
| Arl4c    | 5735.53 | -0.4417 | 0.12175 | -3.6281 | 0.00029  | 0.0042   | 6971.02 | 7004.64 | 5844.84 | 4720.26 | 4587.92 | 5284.52 | Down |
| Gm28342  | 11.0267 | -2.6289 | 1.03459 | -2.541  | 0.01105  | 0.06648  | 7.8337  | 29.5929 | 19.4925 | 30.5914 | 6.18179 | 0       | Down |
| Iqca     | 2162.39 | -1.0718 | 0.32747 | -3.2729 | 0.00106  | 0.01157  | 3505.58 | 1871.26 | 3415.09 | 1405.17 | 813.936 | 1963.31 | Down |
| Mlph     | 4230.95 | 1.20904 | 0.18648 | 6.48353 | 8.96E-11 | 9.69E-09 | 2923.93 | 1917.62 | 2823.5  | 5600.27 | 6689.73 | 5430.65 | Up   |
| Pr1h     | 16.2352 | 1.28188 | 0.61187 | 2.095   | 0.03617  | 0.15426  | 7.8337  | 5.91858 | 14.6194 | 28.552  | 20.606  | 19.8816 | Up   |
| Lrrfip1  | 10464.4 | 0.31574 | 0.13371 | 2.36143 | 0.0182   | 0.09612  | 9575.72 | 10320   | 8075.76 | 10974.2 | 12800.4 | 11040.2 | Up   |
| Rbm44    | 2.94231 | -3.9334 | 1.69361 | -2.3225 | 0.02021  | NA       | 6.85449 | 4.93215 | 4.87314 | 0       | 0       | 0.99408 | Down |
| Ramp1    | 1745.08 | -1.0239 | 0.17646 | -5.8025 | 6.53E-09 | 5.02E-07 | 2596.87 | 2055.72 | 2366.4  | 1159.42 | 926.238 | 1365.86 | Down |
|          |         |         |         |         |          |          |         |         |         |         |         |         |      |

|           |         |         |         |         |          |          |         |         |         |         |         |         |      |
|-----------|---------|---------|---------|---------|----------|----------|---------|---------|---------|---------|---------|---------|------|
| Kif1a     | 1458.73 | -0.5432 | 0.159   | -3.4163 | 0.00063  | 0.00775  | 1509.95 | 1572.37 | 2108.12 | 1210.4  | 1175.57 | 1175.99 | Down |
| Crocc2    | 1630.32 | -0.8477 | 0.26304 | -3.2226 | 0.00127  | 0.01328  | 2311.92 | 1427.36 | 2548.65 | 1370.5  | 824.239 | 1299.26 | Down |
| Mterf4    | 1039.84 | -0.4149 | 0.13134 | -3.1587 | 0.00158  | 0.01566  | 1235.77 | 1142.29 | 1187.1  | 923.862 | 775.815 | 974.197 | Down |
| Bok       | 1707.75 | -0.9528 | 0.23136 | -4.1183 | 3.82E-05 | 0.00083  | 2627.23 | 1498.39 | 2630.52 | 1258.33 | 999.389 | 1232.66 | Down |
| Pdcd1     | 48.9583 | 1.29202 | 0.51225 | 2.52226 | 0.01166  | 0.06907  | 37.2101 | 19.7286 | 28.2642 | 46.9069 | 45.3331 | 116.307 | Up   |
| St8sia4   | 1384.52 | 0.6385  | 0.26423 | 2.41648 | 0.01567  | 0.08621  | 794.142 | 1539.82 | 915.175 | 1537.73 | 2069.87 | 1450.36 | Up   |
| Gm7135    | 52.5934 | -0.6913 | 0.34889 | -1.9814 | 0.04755  | 0.18493  | 77.3578 | 46.3622 | 71.1478 | 37.7295 | 41.2119 | 41.7513 | Down |
| Gm28403   | 155.528 | -0.6345 | 0.22892 | -2.7719 | 0.00557  | 0.04045  | 202.697 | 202.218 | 162.763 | 108.09  | 111.272 | 146.13  | Down |
| Tnfrsf11a | 757.749 | 0.87139 | 0.1234  | 7.06167 | 1.65E-12 | 2.62E-10 | 530.733 | 587.912 | 488.288 | 987.084 | 964.359 | 988.114 | Up   |
| A530053N  | 35.5098 | -1.5089 | 0.61172 | -2.4667 | 0.01364  | 0.07773  | 82.2539 | 35.5115 | 39.9597 | 13.2563 | 9.27269 | 32.8046 | Down |
| Ralb      | 4052.55 | 0.26576 | 0.10252 | 2.59241 | 0.00953  | 0.05967  | 3607.42 | 3912.18 | 3521.33 | 4384.77 | 4738.34 | 4151.27 | Up   |
| Cfap221   | 789.494 | -1.2121 | 0.27037 | -4.4833 | 7.35E-06 | 0.00022  | 1299.42 | 800.981 | 1208.54 | 463.97  | 333.817 | 630.246 | Down |
| Sctr      | 4.73405 | -4.6507 | 1.63634 | -2.8421 | 0.00448  | NA       | 12.7298 | 2.95929 | 11.6955 | 1.01971 | 0       | 0       | Down |
| Marco     | 3830.48 | 3.43543 | 0.26955 | 12.745  | 3.32E-37 | 1.26E-33 | 484.71  | 813.804 | 646.178 | 4479.61 | 8065.18 | 8493.41 | Up   |
| Actr3     | 18207.8 | 0.48883 | 0.10638 | 4.59517 | 4.32E-06 | 0.00014  | 15133.7 | 15994   | 14329   | 20402.5 | 23353.8 | 20033.7 | Up   |
| Gpr39     | 458.255 | 0.43008 | 0.13933 | 3.08672 | 0.00202  | 0.01896  | 363.288 | 413.314 | 394.724 | 492.522 | 569.755 | 515.927 | Up   |
| Lypd1     | 66.0603 | 0.83946 | 0.28934 | 2.90131 | 0.00372  | 0.03013  | 42.1061 | 51.2943 | 48.7314 | 79.5378 | 77.2724 | 97.4197 | Up   |
| Map3k19   | 724.164 | -1.0068 | 0.378   | -2.6636 | 0.00773  | 0.05107  | 1186.81 | 582.98  | 1131.54 | 497.621 | 245.211 | 700.825 | Down |
| Zranb3    | 438.556 | 1.00493 | 0.18779 | 5.35133 | 8.73E-08 | 4.98E-06 | 266.346 | 287.051 | 321.627 | 543.508 | 707.815 | 504.992 | Up   |
| Cd55b     | 120.936 | -1.1353 | 0.34069 | -3.3323 | 0.00086  | 0.00975  | 102.817 | 173.612 | 222.215 | 84.6363 | 61.8179 | 80.5204 | Down |
| Pigr      | 39238.8 | 1.4526  | 0.47487 | 3.05895 | 0.00222  | 0.02047  | 25274.5 | 10987.8 | 26737.9 | 63752.6 | 32496.6 | 76183.2 | Up   |
| Dyrk3     | 822.225 | -0.667  | 0.20305 | -3.285  | 0.00102  | 0.01115  | 1135.89 | 762.51  | 1128.62 | 657.716 | 538.846 | 709.772 | Down |
| Rab7b     | 470.952 | 0.56403 | 0.159   | 3.54727 | 0.00039  | 0.00531  | 357.413 | 408.382 | 374.257 | 567.981 | 631.573 | 486.104 | Up   |
| Slc26a9   | 6765.46 | 0.53185 | 0.24677 | 2.15529 | 0.03114  | 0.13833  | 6135.75 | 6563.7  | 3897.53 | 7670.3  | 10284.4 | 6041.02 | Up   |
| Pm20d1    | 708.167 | -0.419  | 0.17341 | -2.4163 | 0.01568  | 0.08622  | 874.437 | 825.642 | 730.97  | 555.745 | 529.573 | 732.636 | Down |
| Elk4      | 61.9466 | 0.7592  | 0.36406 | 2.0854  | 0.03703  | 0.15677  | 44.0646 | 30.5793 | 63.3508 | 82.5969 | 84.4845 | 66.6033 | Up   |
| Mfscd4a   | 2023.21 | 2.21143 | 0.29454 | 7.50806 | 6.00E-14 | 1.26E-11 | 857.79  | 373.857 | 923.947 | 3671.99 | 3089.87 | 3221.81 | Up   |
| Cdk18     | 1908.22 | 0.2825  | 0.13107 | 2.15535 | 0.03113  | 0.13833  | 1582.41 | 1850.54 | 1732.89 | 2229.1  | 2220.29 | 1834.07 | Up   |
| Gm29630   | 1.69804 | 4.23483 | 2.14613 | 1.97324 | 0.04847  | NA       | 0       | 0       | 0       | 4.07886 | 4.12119 | 1.98816 | Up   |
| Klhdc8a   | 844.468 | 0.33032 | 0.12563 | 2.6294  | 0.00855  | 0.05523  | 676.636 | 798.022 | 769.956 | 1001.36 | 924.178 | 896.659 | Up   |
| Tmcc2     | 7059.18 | -0.365  | 0.14384 | -2.5377 | 0.01116  | 0.06699  | 8285.12 | 8824.6  | 6732.73 | 5928.62 | 6871.06 | 5712.97 | Down |
| Ppp1r15b  | 7027.72 | 0.20989 | 0.08015 | 2.61873 | 0.00883  | 0.05645  | 6548.97 | 6251.99 | 6751.24 | 7401.09 | 7511.91 | 7701.13 | Up   |
| Plekha6   | 4375.59 | 0.28913 | 0.14624 | 1.97707 | 0.04803  | 0.18622  | 3881.6  | 3403.18 | 4531.04 | 4594.84 | 4481.8  | 5361.07 | Up   |
| Prep      | 987.831 | 0.49233 | 0.14229 | 3.46014 | 0.00054  | 0.00683  | 894.021 | 859.18  | 709.529 | 1053.37 | 1222.96 | 1187.92 | Up   |
| Chil1     | 131589  | 1.08366 | 0.16555 | 6.5456  | 5.93E-11 | 6.96E-09 | 69816.9 | 78559.3 | 104729  | 189802  | 170553  | 176076  | Up   |
| Ppfia4    | 510.901 | 0.67612 | 0.18459 | 3.66286 | 0.00025  | 0.00379  | 366.226 | 488.283 | 325.526 | 640.381 | 633.634 | 611.358 | Up   |
| Tmem183   | 4312.77 | 0.214   | 0.08228 | 2.60083 | 0.0093   | 0.05851  | 4032.4  | 4063.1  | 3884.86 | 4568.32 | 4820.77 | 4507.15 | Up   |
| Cyb5r1    | 2990.38 | 0.42933 | 0.13676 | 3.13922 | 0.00169  | 0.01651  | 2494.05 | 2768.91 | 2382.96 | 3389.53 | 3900.71 | 3006.09 | Up   |
| Klhl12    | 1323.57 | -0.2448 | 0.12204 | -2.0058 | 0.04488  | 0.17769  | 1395.38 | 1309.98 | 1601.31 | 1178.79 | 1260.06 | 1195.88 | Down |
| Rabif     | 2458.6  | -0.6167 | 0.20603 | -2.9931 | 0.00276  | 0.0241   | 3429.2  | 3378.52 | 2120.79 | 2030.25 | 2103.87 | 1688.94 | Down |
| Ube2t     | 128.997 | -0.5321 | 0.23451 | -2.2692 | 0.02326  | 0.11296  | 148.84  | 144.019 | 164.712 | 126.445 | 87.5754 | 102.39  | Down |
| Lgr6      | 368.382 | -2.3333 | 0.92013 | -2.5358 | 0.01122  | 0.06729  | 1101.61 | 84.8329 | 657.873 | 101.971 | 157.636 | 106.366 | Down |
| Ptpn7     | 395.828 | 0.41116 | 0.14147 | 2.90627 | 0.00366  | 0.02981  | 347.621 | 355.115 | 316.754 | 423.182 | 448.18  | 484.116 | Up   |
| Gpr3711   | 30.538  | -1.8192 | 0.57322 | -3.1736 | 0.00151  | 0.01503  | 41.1269 | 25.6472 | 76.0209 | 12.2366 | 10.303  | 17.8934 | Down |
| Rnpep     | 3533.29 | 0.40545 | 0.10796 | 3.75551 | 0.00017  | 0.00286  | 3067.87 | 2901.09 | 3150.97 | 4111.49 | 4320.04 | 3648.27 | Up   |
| Lmod1     | 259.707 | -0.4644 | 0.21382 | -2.1719 | 0.02986  | 0.13461  | 282.992 | 282.119 | 338.196 | 219.239 | 262.726 | 172.97  | Down |
| Shisa4    | 366.39  | -0.7883 | 0.26002 | -3.0317 | 0.00243  | 0.02193  | 436.729 | 424.165 | 531.172 | 231.475 | 373.998 | 200.804 | Down |
| Csrp1     | 21118.4 | 0.37285 | 0.08206 | 4.54388 | 5.52E-06 | 0.00017  | 18207.5 | 18197.7 | 18808.4 | 22938.5 | 25181.5 | 23376.8 | Up   |
| Tnnt2     | 976.134 | -0.2952 | 1.26036 | -2.3051 | 0.02116  | 0.10633  | 2634.08 | 77.9279 | 2455.09 | 240.653 | 77.2724 | 371.785 | Down |
| Tmem9     | 2311.15 | -0.2459 | 0.11265 | -2.1833 | 0.02902  | 0.13197  | 2442.16 | 2459.17 | 2621.75 | 2317.81 | 1923.57 | 2102.48 | Down |
| Kif21b    | 1196.91 | 0.5854  | 0.24308 | 2.40831 | 0.01603  | 0.08767  | 734.41  | 1330.69 | 806.991 | 1262.41 | 1672.17 | 1374.81 | Up   |
| Camsap2   | 320.656 | 0.7635  | 0.27402 | 2.78627 | 0.00533  | 0.03916  | 292.785 | 198.272 | 222.215 | 333.447 | 323.514 | 553.702 | Up   |
| Gm19705   | 198.648 | -0.5139 | 0.1857  | -2.7673 | 0.00565  | 0.04091  | 250.678 | 248.58  | 201.748 | 160.095 | 162.787 | 167.999 | Down |
| Ptpnc     | 6217.51 | 0.67179 | 0.17332 | 3.87608 | 0.00011  | 0.00196  | 4153.82 | 5960.01 | 4272.77 | 6896.33 | 8498.93 | 7523.19 | Up   |
| Rgs2      | 5237.37 | 0.88539 | 0.32708 | 2.70694 | 0.00679  | 0.04656  | 2294.3  | 5042.63 | 3699.69 | 6892.25 | 9352.02 | 4143.32 | Up   |
| Rgs1      | 667.408 | 1.45134 | 0.31516 | 4.60501 | 4.12E-06 | 0.00013  | 222.281 | 497.161 | 352.815 | 1287.9  | 935.511 | 708.778 | Up   |
| Rgs18     | 314.714 | -0.6689 | 0.15119 | -4.4242 | 9.68E-06 | 0.00027  | 404.415 | 362.02  | 392.775 | 224.337 | 247.272 | 257.466 | Down |
| Ptgs2os2  | 593.029 | 0.67729 | 0.17651 | 3.83709 | 0.00012  | 0.00222  | 495.482 | 417.26  | 456.126 | 684.229 | 877.814 | 627.264 | Up   |
| Fam129a   | 4019.39 | 0.42887 | 0.10109 | 4.24261 | 2.21E-05 | 0.00053  | 3534.96 | 3457.44 | 3286.44 | 4611.15 | 4956.77 | 4269.57 | Up   |
| Tsen15    | 906.245 | -0.2947 | 0.10994 | -2.6809 | 0.00734  | 0.04925  | 1021.32 | 1022.93 | 951.236 | 863.699 | 793.027 | 795.263 | Down |
| Arpc5     | 16018.4 | 0.32752 | 0.11357 | 2.88392 | 0.00393  | 0.03129  | 13677.6 | 14622.8 | 14323.1 | 17941.9 | 19703.4 | 15841.6 | Up   |
| Ncf2      | 2202.36 | 0.91275 | 0.19454 | 4.69179 | 2.71E-06 | 9.28E-05 | 1405.17 | 1926.5  | 1252.4  | 2851.12 | 3291.8  | 2487.18 | Up   |
| Lamc2     | 13416   | 0.62654 | 0.15115 | 4.14506 | 3.40E-05 | 0.00076  | 8686.6  | 12409.3 | 10547.4 | 15622   | 17405.9 | 15824.7 | Up   |
| Lamc1     | 7425.54 | 0.27036 | 0.08608 | 3.14078 | 0.00168  | 0.01647  | 6703.69 | 6993.79 | 6497.84 | 8123.05 | 8472.14 | 7762.76 | Up   |
| Shcbp1l   | 50.58   | 0.7192  | 0.31654 | 2.27208 | 0.02308  | 0.11232  | 41.1269 | 37.4843 | 36.0612 | 56.0843 | 71.0906 | 61.6329 | Up   |
| Dhx9      | 4888.07 | 0.30838 | 0.11793 | 2.61489 | 0.00893  | 0.05693  | 4701.2  | 3949.66 | 4452.1  | 5080.22 | 5248.34 | 5896.87 | Up   |
| Npl       | 459.725 | -0.792  | 0.23738 | -3.3364 | 0.00085  | 0.00966  | 627.675 | 412.328 | 708.554 | 344.664 | 285.393 | 379.738 | Down |
| Rnasel    | 1598.9  | 0.9486  | 0.12516 | 7.57884 | 3.49E-14 | 7.67E-12 | 997.818 | 1189.63 | 1086.71 | 2029.23 | 2305.81 | 1984.18 | Up   |
| Gm28286   | 74.0414 | 3.62427 | 0.47284 | 7.66492 | 1.79E-14 | 4.23E-12 | 7.8337  | 11.8372 | 13.6448 | 85.6561 | 203.999 | 121.278 | Up   |
| Cacna1e   | 305.503 | -0.5243 | 0.14861 | -3.5281 | 0.00042  | 0.00562  | 355.454 | 381.748 | 344.043 | 235.554 | 262.726 | 253.49  | Down |
| Ier5      | 3663.39 | -0.367  | 0.11123 | -3.2993 | 0.00097  | 0.01073  | 4408.42 | 3719.83 | 4252.3  | 3130.52 | 3077.5  | 3391.8  | Down |
| Tdrd5     | 960.098 | 2.82054 | 0.37191 | 7.58401 | 3.35E-14 | 7.46E-12 | 198.78  | 324.535 | 191.027 | 1510.2  | 2661.26 | 874.789 | Up   |
| Nphs2     | 40.5964 | 4.17801 | 0.5616  | 7.43951 | 1.01E-13 | 1.97E-11 | 4.89606 | 5.91858 | 1.94925 | 68.3209 | 97.8784 | 64.6151 | Up   |
| Axdnd1    | 561.325 | 1.78886 | 0.3507  | 5.10083 | 3.38E-07 | 1.61E-05 | 213.468 | 373.857 | 168.611 | 757.648 | 1255.93 | 598.435 | Up   |
| Soat1     | 21203.4 | 0.47892 | 0.21411 | 2.23678 | 0.0253   | 0.1197   | 17245.9 | 23193.9 | 12708.2 | 24695.5 | 27235.9 | 22141.1 | Up   |
| Abl2      | 2118.19 | 0.27536 | 0.10219 | 2.69469 | 0.00705  | 0.04777  | 1827.21 | 1932.42 | 1990.19 | 2300.48 | 2476.84 | 2182    | Up   |
| Fam20b    | 4758.62 | 0.38533 | 0.07789 | 4.94726 | 7.53E-07 | 3.15E-05 | 4020.65 | 4116.37 | 4       |         |         |         |      |

|           |         |         |         |         |          |          |         |         |         |         |         |         |      |
|-----------|---------|---------|---------|---------|----------|----------|---------|---------|---------|---------|---------|---------|------|
| Fmo6      | 234.721 | -2.5195 | 1.12071 | -2.2481 | 0.02457  | 0.11723  | 613.966 | 38.4708 | 546.766 | 56.0843 | 26.7878 | 126.248 | Down |
| Kifap3    | 2840.99 | -0.3848 | 0.13511 | -2.8479 | 0.0044   | 0.03396  | 3491.87 | 2713.67 | 3447.26 | 2332.09 | 2549.99 | 2511.04 | Down |
| Ccdc181   | 5137.09 | -0.6399 | 0.24461 | -2.6162 | 0.00889  | 0.05679  | 7324.51 | 4312.67 | 7137.2  | 4348.06 | 2968.29 | 4731.81 | Down |
| Blzf1     | 2194.4  | -0.2617 | 0.1267  | -2.0659 | 0.03884  | 0.16198  | 2429.43 | 2120.82 | 2628.57 | 2002.72 | 1854.54 | 2130.31 | Down |
| Nme7      | 1373.81 | -0.4028 | 0.16475 | -2.4446 | 0.0145   | 0.08152  | 1743.98 | 1295.18 | 1653.94 | 1199.18 | 1034.42 | 1316.16 | Down |
| Atp1b1    | 39982.9 | 0.72678 | 0.12209 | 5.95258 | 2.64E-09 | 2.17E-07 | 32442.3 | 25839.5 | 32076.9 | 51767.9 | 49711.9 | 48058.7 | Up   |
| Dpt       | 594.471 | 0.45474 | 0.16172 | 2.81192 | 0.00492  | 0.03694  | 575.777 | 489.269 | 439.557 | 648.539 | 766.542 | 647.145 | Up   |
| Sft2d2    | 7507.06 | 0.22538 | 0.08378 | 2.69017 | 0.00714  | 0.04824  | 6789.86 | 6875.41 | 7100.16 | 8348.41 | 8268.15 | 7660.37 | Up   |
| Mpzl1     | 2515.83 | 0.40536 | 0.10715 | 3.78322 | 0.00015  | 0.00262  | 2134.68 | 2262.87 | 2096.42 | 2907.21 | 3074.41 | 2619.4  | Up   |
| Dusp27    | 9.80178 | -3.1293 | 1.55191 | -2.0164 | 0.04375  | 0.17475  | 35.2517 | 0       | 17.5433 | 2.03943 | 0       | 3.97631 | Down |
| Gpa33     | 17.8888 | 1.40974 | 0.68313 | 2.06364 | 0.03905  | 0.16245  | 9.79213 | 4.93215 | 14.6194 | 38.7492 | 13.3939 | 25.846  | Up   |
| Rgs4      | 667.125 | 0.93565 | 0.18775 | 4.98357 | 6.24E-07 | 2.70E-05 | 406.373 | 579.034 | 388.876 | 932.019 | 835.572 | 860.872 | Up   |
| Ccdc190   | 23.2226 | -1.5492 | 0.53675 | -2.8863 | 0.0039   | 0.03114  | 46.023  | 27.62   | 30.2134 | 7.138   | 14.4242 | 13.9171 | Down |
| Hsd17b7   | 1467    | 0.61757 | 0.15253 | 4.04892 | 5.15E-05 | 0.00107  | 1172.12 | 1209.36 | 1091.58 | 1650.92 | 2118.29 | 1559.71 | Up   |
| Uap1      | 4380.75 | 0.28394 | 0.08358 | 3.39738 | 0.00068  | 0.00815  | 4076.46 | 3908.23 | 3868.3  | 4949.7  | 4871.25 | 4610.54 | Up   |
| Uhmk1     | 8172.45 | 0.24422 | 0.09278 | 2.63209 | 0.00849  | 0.05495  | 7427.33 | 7899.33 | 7120.63 | 8368.8  | 9053.23 | 9165.4  | Up   |
| Sh2d1b1   | 717.347 | 1.30128 | 0.26661 | 4.88092 | 1.06E-06 | 4.17E-05 | 366.226 | 565.224 | 310.906 | 894.29  | 1310.54 | 856.896 | Up   |
| Olfml2b   | 540.569 | -0.3306 | 0.1416  | -2.3347 | 0.01956  | 0.10058  | 663.906 | 536.618 | 606.218 | 472.128 | 460.543 | 503.998 | Down |
| Fcrlb     | 53.1814 | 1.01071 | 0.42508 | 2.37767 | 0.01742  | 0.09335  | 52.8775 | 26.6336 | 26.3149 | 92.7941 | 61.8179 | 58.6506 | Up   |
| Fcgr2b    | 3053.17 | 0.94307 | 0.17702 | 5.32758 | 9.95E-08 | 5.52E-06 | 2266.88 | 2315.15 | 1686.11 | 3622.03 | 3677.14 | 4751.7  | Up   |
| Fcgr4     | 918.891 | 1.23154 | 0.28631 | 4.30134 | 1.70E-05 | 0.00043  | 460.23  | 759.551 | 426.887 | 1146.16 | 1745.33 | 975.191 | Up   |
| Fcgr3     | 3612.47 | 1.03695 | 0.20455 | 5.0695  | 3.99E-07 | 1.84E-05 | 2518.54 | 2928.71 | 1654.92 | 4828.35 | 5071.13 | 4673.16 | Up   |
| Fcap126   | 3235.71 | -1.0283 | 0.26277 | -3.9133 | 9.10E-05 | 0.00172  | 4816.75 | 3039.19 | 5171.37 | 2374.92 | 1440.36 | 2571.68 | Down |
| Pcp411    | 9452.37 | -0.9983 | 0.21809 | -4.5774 | 4.71E-06 | 0.00015  | 14430.7 | 9463.81 | 13900.1 | 6671.99 | 4767.19 | 7480.44 | Down |
| Tomm40l   | 343.213 | 0.31565 | 0.15008 | 2.10326 | 0.03544  | 0.15195  | 323.14  | 304.807 | 289.464 | 353.841 | 416.241 | 371.785 | Up   |
| Fcer1g    | 2911.52 | 1.05343 | 0.17391 | 6.05733 | 1.38E-09 | 1.19E-07 | 1745.94 | 2252.02 | 1682.21 | 3715.84 | 4643.56 | 3429.57 | Up   |
| Usp21     | 2184.8  | -0.2708 | 0.1337  | -2.0253 | 0.04284  | 0.17231  | 2631.14 | 2086.3  | 2450.21 | 2161.8  | 1861.75 | 1917.58 | Down |
| Klhdc9    | 158.504 | -1.015  | 0.32454 | -3.1273 | 0.00176  | 0.01701  | 254.595 | 129.222 | 252.428 | 104.011 | 85.5148 | 125.254 | Down |
| Arhgap30  | 2119.02 | 0.77767 | 0.17764 | 4.37775 | 1.20E-05 | 0.00032  | 1336.63 | 1917.62 | 1429.78 | 2469.75 | 3067.2  | 2493.15 | Up   |
| Tstd1     | 246.702 | -0.5214 | 0.18017 | -2.8937 | 0.00381  | 0.03067  | 327.057 | 287.051 | 258.276 | 221.278 | 193.696 | 192.851 | Down |
| F11r      | 14098.4 | 0.20853 | 0.07872 | 2.649   | 0.00807  | 0.05284  | 12659.3 | 13154   | 13430.4 | 15311   | 15483.3 | 14552.3 | Up   |
| Cd244a    | 497.945 | 0.33441 | 0.13555 | 2.46705 | 0.01362  | 0.0777   | 402.456 | 484.337 | 434.684 | 546.567 | 573.876 | 545.749 | Up   |
| Slamf7    | 369.782 | 0.73531 | 0.1751  | 4.19948 | 2.68E-05 | 0.00062  | 266.346 | 246.607 | 319.678 | 462.951 | 413.15  | 509.962 | Up   |
| Cd48      | 1548.63 | 0.63759 | 0.19982 | 3.19077 | 0.00142  | 0.01433  | 1111.41 | 1546.72 | 977.551 | 1875.26 | 2131.69 | 1649.18 | Up   |
| Cd84      | 2721    | 1.31072 | 0.17918 | 7.31528 | 2.57E-13 | 4.72E-11 | 1484.49 | 1829.83 | 1376.17 | 3574.1  | 4706.4  | 3355.02 | Up   |
| Gm10521   | 35.0383 | 2.12358 | 0.49286 | 4.30867 | 1.64E-05 | 0.00042  | 15.6674 | 14.7964 | 8.77165 | 44.8675 | 81.3936 | 44.7335 | Up   |
| Slamf6    | 400.208 | 0.52854 | 0.23843 | 2.21673 | 0.02664  | 0.12442  | 328.036 | 419.233 | 235.86  | 450.714 | 541.937 | 425.466 | Up   |
| Ncstn     | 7415.82 | 0.36305 | 0.07733 | 4.69466 | 2.67E-06 | 9.19E-05 | 6406.99 | 6487.75 | 6568.01 | 8647.07 | 8384.57 | 8037.12 | Up   |
| Igsf8     | 2458.57 | 0.35916 | 0.13173 | 2.7264  | 0.0064   | 0.04472  | 1988.78 | 2027.11 | 2446.31 | 2696.13 | 3009.5  | 2583.61 | Up   |
| Kcnj10    | 103.161 | 0.65604 | 0.30279 | 2.16667 | 0.03026  | 0.13592  | 82.2539 | 100.616 | 57.503  | 122.366 | 106.121 | 150.106 | Up   |
| Slamf9    | 701.689 | 0.78477 | 0.18643 | 4.2094  | 2.56E-05 | 0.0006   | 423.02  | 615.532 | 507.781 | 783.141 | 872.663 | 1008    | Up   |
| Cfap45    | 901.486 | -0.7567 | 0.2694  | -2.8087 | 0.00497  | 0.03721  | 1274.94 | 752.646 | 1370.33 | 744.392 | 485.271 | 781.346 | Down |
| 4933439K  | 272.267 | -0.7747 | 0.37714 | -2.0543 | 0.03995  | 0.16492  | 474.918 | 215.042 | 341.12  | 191.706 | 120.545 | 290.271 | Down |
| Aim2      | 815.243 | 1.22284 | 0.21584 | 5.66538 | 1.47E-08 | 1.04E-06 | 449.459 | 579.034 | 438.582 | 1119.65 | 1426.96 | 877.771 | Up   |
| Ifi207    | 954.981 | 0.46731 | 0.17346 | 2.69407 | 0.00706  | 0.04781  | 981.171 | 722.066 | 701.732 | 1213.46 | 1018.97 | 1092.49 | Up   |
| Ifi203-ps | 367.439 | 0.72028 | 0.2262  | 3.18429 | 0.00145  | 0.01459  | 244.803 | 353.142 | 234.885 | 431.339 | 397.695 | 542.767 | Up   |
| Ifi202b   | 5.72835 | -2.9089 | 1.40597 | -2.0689 | 0.03855  | NA       | 22.5219 | 1.97286 | 5.84776 | 2.03943 | 0       | 1.98816 | Down |
| Fmn2      | 254.972 | -0.5553 | 0.2633  | -2.1089 | 0.03495  | 0.15039  | 220.323 | 408.382 | 281.667 | 225.357 | 182.363 | 211.739 | Down |
| Rgs7      | 19.9611 | -1.4829 | 0.63904 | -2.3206 | 0.02031  | 0.10332  | 43.0854 | 21.7015 | 23.3911 | 16.3154 | 10.303  | 4.97039 | Down |
| Kmo       | 321.874 | 0.35956 | 0.16998 | 2.11529 | 0.03441  | 0.14878  | 255.575 | 309.739 | 280.693 | 327.328 | 351.332 | 406.578 | Up   |
| 1700016C  | 68.376  | -1.1352 | 0.38025 | -2.9854 | 0.00283  | 0.0246   | 89.1084 | 72.9958 | 119.879 | 38.7492 | 29.8787 | 59.6447 | Down |
| Catspere2 | 1831.46 | 0.48464 | 0.12835 | 3.77578 | 0.00016  | 0.00268  | 1320.96 | 1634.51 | 1624.7  | 2077.16 | 2069.87 | 2261.53 | Up   |
| Gm38300   | 133.359 | -0.6976 | 0.23169 | -3.011  | 0.0026   | 0.02307  | 141.986 | 179.53  | 173.484 | 115.228 | 86.5451 | 103.384 | Down |
| Efcab2    | 569.075 | -0.6626 | 0.23095 | -2.8691 | 0.00412  | 0.03229  | 777.495 | 517.876 | 797.245 | 447.655 | 350.301 | 523.879 | Down |
| Kif26b    | 996.815 | -0.8864 | 0.18092 | -4.8991 | 9.63E-07 | 3.85E-05 | 1422.8  | 1018    | 1440.5  | 727.057 | 614.058 | 758.482 | Down |
| Smyd3     | 1223.4  | -0.8811 | 0.19526 | -4.5123 | 6.41E-06 | 0.00019  | 1546.18 | 1294.2  | 1917.09 | 869.817 | 716.057 | 997.061 | Down |
| Sccpdh    | 2194.77 | -0.5591 | 0.15478 | -3.6121 | 0.0003   | 0.00441  | 2799.57 | 2391.11 | 2653.91 | 1818.15 | 1464.05 | 2041.84 | Down |
| Parp1     | 3201.12 | 0.25454 | 0.12398 | 2.05303 | 0.04007  | 0.16523  | 2696.75 | 3209.84 | 2851.76 | 3186.61 | 3817.26 | 3444.48 | Up   |
| Lin9      | 316.259 | 0.45242 | 0.20854 | 2.16949 | 0.03005  | 0.13517  | 216.406 | 245.621 | 339.17  | 356.9   | 363.695 | 375.762 | Up   |
| Pycr2     | 2262.28 | -0.3943 | 0.10801 | -3.6504 | 0.00026  | 0.00394  | 2687.94 | 2454.24 | 2566.19 | 2114.89 | 1944.17 | 1806.24 | Down |
| Ccdc121   | 1413.33 | -0.9428 | 0.31923 | -2.9535 | 0.00314  | 0.02659  | 2332.48 | 1158.07 | 2087.65 | 1124.75 | 582.119 | 1194.88 | Down |
| Enah      | 3734.81 | -0.5495 | 0.23617 | -2.3266 | 0.01999  | 0.10219  | 4719.81 | 3067.8  | 5525.16 | 3382.39 | 2368.66 | 3345.07 | Down |
| Taf1a     | 935.116 | -0.3559 | 0.16171 | -2.2005 | 0.02777  | 0.12807  | 1190.72 | 891.732 | 1067.22 | 833.107 | 724.3   | 903.617 | Down |
| Gm37986   | 26.2439 | -1.2021 | 0.44139 | -2.7235 | 0.00646  | 0.04498  | 40.1477 | 33.5386 | 36.0612 | 19.3746 | 14.4242 | 13.9171 | Down |
| Hhipl2    | 23.4102 | -1.0167 | 0.51705 | -1.9664 | 0.04926  | 0.18906  | 31.3348 | 28.6065 | 34.112  | 11.2169 | 11.3333 | 23.8579 | Down |
| 1700112H  | 2.045   | 4.50264 | 2.13944 | 2.10459 | 0.03533  | NA       | 0       | 0       | 0       | 2.03943 | 8.24239 | 1.98816 | Up   |
| Gm37800   | 36.5121 | 1.07358 | 0.40826 | 2.62965 | 0.00855  | 0.05522  | 20.5635 | 21.7015 | 28.2642 | 52.0055 | 59.7573 | 36.7809 | Up   |
| Mtarcl1   | 77.7603 | -1.7089 | 0.42295 | -4.0405 | 5.33E-05 | 0.00111  | 115.547 | 86.8058 | 154.966 | 48.9463 | 18.5454 | 41.7513 | Down |
| Bpnt1     | 2757.51 | -0.2351 | 0.11048 | -2.1278 | 0.03336  | 0.14575  | 3164.82 | 2835.99 | 2944.35 | 2504.42 | 2341.87 | 2753.6  | Down |
| Lyplal1   | 478.402 | -0.5568 | 0.24221 | -2.2989 | 0.02151  | 0.10714  | 533.671 | 472.5   | 702.706 | 414.004 | 282.302 | 465.229 | Down |
| Tgfb2     | 1880.35 | 0.53875 | 0.13338 | 4.03914 | 5.36E-05 | 0.00111  | 1312.15 | 1659.17 | 1628.6  | 2131.2  | 180.11  | 2370.88 | Up   |
| Spata17   | 1158.67 | -0.8797 | 0.2627  | -3.3486 | 0.00081  | 0.00932  | 1734.19 | 1069.29 | 1700.72 | 893.27  | 559.452 | 995.073 | Down |
| Esrrg     | 381.573 | -1.0499 | 0.35691 | -2.9417 | 0.00326  | 0.02732  | 566.964 | 356.101 | 620.838 | 243.712 | 135.999 | 365.821 | Down |
| A230020J  | 71.7473 | -1.0866 | 0.35407 | -3.0688 | 0.00215  | 0.01993  | 109.672 | 63.1315 | 119.879 | 48.9463 | 39.1513 | 49.7039 | Down |
| Nek2      | 1941.82 | -0.896  | 0.30339 | -2.9532 | 0.00314  | 0.02659  | 2658.56 | 1716.39 | 3203.6  | 1367.44 | 849.996 | 1854.95 | Down |
| 1700034H  | 103.261 | -0.8216 | 0.388   | -2.1177 | 0.0342   | 0.14823  | 126.318 | 121.331 | 148.143 | 62.2026 | 43.2725 | 118.295 | Down |
| Rd3       | 386.035 | -1.776  | 0.41399 | -4.29   | 1.79E-05 | 0.00045  | 723.638 | 235.757 |         |         |         |         |      |

|            |         |         |         |         |          |          |         |         |         |         |         |         |      |
|------------|---------|---------|---------|---------|----------|----------|---------|---------|---------|---------|---------|---------|------|
| Phyh       | 3860.32 | -0.3062 | 0.1045  | -2.9297 | 0.00339  | 0.02814  | 4131.3  | 4057.18 | 4616.81 | 3411.97 | 3280.47 | 3664.17 | Down |
| Gm13391    | 54.5833 | 1.2692  | 0.4198  | 3.02333 | 0.0025   | 0.02243  | 50.9191 | 22.6879 | 22.4164 | 72.3998 | 85.5148 | 73.5618 | Up   |
| Gm38386    | 3.89948 | 3.45058 | 1.60452 | 2.15053 | 0.03151  | NA       | 1.95843 | 0       | 0       | 5.09857 | 12.3636 | 3.97631 | Up   |
| Gata3      | 280.125 | 0.68181 | 0.26399 | 2.58269 | 0.0098   | 0.06083  | 144.923 | 288.037 | 212.469 | 374.235 | 339.998 | 321.087 | Up   |
| Itih5      | 354.584 | -0.8307 | 0.26749 | -3.1057 | 0.0019   | 0.01799  | 550.318 | 294.942 | 516.552 | 294.698 | 220.484 | 250.508 | Down |
| E03001311  | 138.63  | -0.787  | 0.27254 | -2.8875 | 0.00388  | 0.03106  | 158.632 | 198.272 | 169.585 | 118.287 | 116.424 | 70.5796 | Down |
| C1ql3      | 2.6924  | 3.84952 | 1.79709 | 2.14208 | 0.03219  | NA       | 0       | 0       | 0.97463 | 2.03943 | 6.18179 | 6.95855 | Up   |
| Vim        | 44312   | 0.4945  | 0.13591 | 3.63831 | 0.00027  | 0.00407  | 37024   | 39358.5 | 33991.1 | 52542.8 | 58660   | 44295.1 | Up   |
| Hacd1      | 910.257 | -0.2396 | 0.11318 | -2.1165 | 0.0343   | 0.14845  | 957.67  | 1007.14 | 992.171 | 766.826 | 878.845 | 858.884 | Down |
| Stamos     | 46.5851 | -1.1347 | 0.37654 | -3.0134 | 0.00258  | 0.02298  | 64.628  | 54.2536 | 73.097  | 33.6506 | 33.9998 | 19.8816 | Down |
| Mrc1       | 9410.05 | 1.22423 | 0.17362 | 7.05132 | 1.77E-12 | 2.79E-10 | 6127.91 | 6114.88 | 4680.16 | 12743.4 | 15681.1 | 11112.8 | Up   |
| Slc39a12   | 90.515  | 1.1638  | 0.24742 | 4.70371 | 2.55E-06 | 8.87E-05 | 63.6488 | 52.2808 | 51.6552 | 127.464 | 127.757 | 120.284 | Up   |
| Gm13266    | 12.5801 | 1.81946 | 0.74046 | 2.45719 | 0.014    | 0.07925  | 5.87528 | 5.91858 | 4.87314 | 31.6112 | 10.303  | 16.8993 | Up   |
| Mhl10      | 823.513 | 0.20299 | 0.10343 | 1.96264 | 0.04969  | 0.19018  | 778.474 | 734.89  | 783.6   | 885.113 | 890.178 | 868.825 | Up   |
| Pip4k2a    | 2123.13 | 0.3742  | 0.12916 | 2.89715 | 0.00377  | 0.03042  | 1664.66 | 2066.57 | 1816.71 | 2268.87 | 2609.75 | 2312.23 | Up   |
| Armc3      | 838.133 | -1.0502 | 0.29219 | -3.5942 | 0.00033  | 0.00466  | 1293.54 | 759.551 | 1338.16 | 626.105 | 352.362 | 659.074 | Down |
| Msr2       | 1112.62 | -0.4475 | 0.1307  | -3.424  | 0.00062  | 0.0076   | 1343.48 | 1326.75 | 1181.25 | 1050.31 | 863.39  | 910.576 | Down |
| Enkur      | 2640.56 | -0.8338 | 0.27461 | -3.0362 | 0.0024   | 0.02168  | 3957.98 | 2226.37 | 3964.78 | 2104.69 | 1298.18 | 2291.35 | Down |
| Apbb1ip    | 1538.23 | 0.9632  | 0.22648 | 4.25299 | 2.11E-05 | 0.00051  | 956.691 | 1288.28 | 883.987 | 1833.45 | 2640.65 | 1626.31 | Up   |
| Il1f9      | 187.358 | 0.56554 | 0.27259 | 2.07466 | 0.03802  | 0.15939  | 142.965 | 117.385 | 192.976 | 215.16  | 180.302 | 275.36  | Up   |
| Il1rn      | 809.896 | 1.08455 | 0.23186 | 4.67762 | 2.90E-06 | 9.82E-05 | 429.874 | 704.311 | 422.988 | 985.045 | 1271.39 | 1045.77 | Up   |
| Cacna1b    | 121.025 | 0.60548 | 0.25631 | 2.36228 | 0.01816  | 0.09609  | 105.755 | 77.9279 | 104.285 | 173.352 | 124.666 | 140.165 | Up   |
| Pnp1a7     | 2077.76 | 0.90423 | 0.16894 | 5.35232 | 8.68E-08 | 4.96E-06 | 1227.93 | 1500.36 | 1613.01 | 2606.39 | 3187.74 | 2331.11 | Up   |
| Entpd8     | 399.685 | 1.19719 | 0.39223 | 3.05222 | 0.00227  | 0.02085  | 324.119 | 137.114 | 267.048 | 605.711 | 295.696 | 768.423 | Up   |
| AL732309   | 542.278 | -0.645  | 0.28229 | -2.285  | 0.02231  | 0.10976  | 646.28  | 904.556 | 433.709 | 364.038 | 522.361 | 382.72  | Down |
| Tor4a      | 2768.67 | 0.25282 | 0.1104  | 2.29011 | 0.02202  | 0.10883  | 2582.18 | 2686.05 | 2311.82 | 2876.62 | 3223.8  | 2931.54 | Up   |
| Tubb4b     | 26899.6 | -0.3245 | 0.14521 | -2.2348 | 0.02543  | 0.12023  | 33723.1 | 25852.3 | 30161.8 | 26080.6 | 20830.6 | 24749.6 | Down |
| Cysrt1     | 63.7112 | -0.9475 | 0.32026 | -2.9584 | 0.00309  | 0.0263   | 84.2123 | 77.9279 | 89.6657 | 43.8477 | 31.9393 | 54.6743 | Down |
| Rnf208     | 192.9   | -1.1763 | 0.26489 | -4.4408 | 8.96E-06 | 0.00026  | 230.115 | 267.322 | 305.058 | 121.346 | 83.4542 | 150.106 | Down |
| Lrrc26     | 714.528 | -0.7405 | 0.35429 | -2.09   | 0.03662  | 0.15559  | 1199.54 | 403.45  | 1078.91 | 626.105 | 452.301 | 526.862 | Down |
| Man1b1     | 4868.2  | 0.23086 | 0.08013 | 2.88098 | 0.00396  | 0.03149  | 4615.03 | 4339.3  | 4484.26 | 5114.89 | 5293.67 | 5362.06 | Up   |
| Dpp7       | 2000.29 | 0.68429 | 0.12192 | 5.61267 | 1.99E-08 | 1.35E-06 | 1646.06 | 1607.88 | 1349.86 | 2505.44 | 2563.38 | 2329.13 | Up   |
| Fut7       | 44.9033 | 1.08529 | 0.37099 | 2.92543 | 0.00344  | 0.02843  | 28.3972 | 31.5657 | 26.3149 | 62.2026 | 75.2118 | 45.7276 | Up   |
| Tmem250    | 3581.3  | -0.3102 | 0.08238 | -3.7652 | 0.00017  | 0.00277  | 3941.33 | 4077.9  | 3875.12 | 3289.6  | 3207.32 | 3096.55 | Down |
| Gm13553    | 2.17873 | 4.59654 | 2.06064 | 2.23064 | 0.0257   | NA       | 0       | 0       | 0       | 3.05914 | 2.0606  | 7.95263 | Up   |
| Ccdc187    | 3664.94 | -0.7488 | 0.29456 | -2.5422 | 0.01102  | 0.06633  | 5085.05 | 3047.08 | 5653.81 | 2907.21 | 1726.78 | 3569.74 | Down |
| Dnlz       | 1197.31 | 0.43826 | 0.1135  | 3.86122 | 0.00011  | 0.00205  | 1074.2  | 1047.59 | 928.82  | 1406.19 | 1309.51 | 1417.56 | Up   |
| Card9      | 128.099 | 0.66557 | 0.25387 | 2.62166 | 0.00875  | 0.0561   | 84.2123 | 123.304 | 89.6657 | 154.997 | 178.242 | 138.177 | Up   |
| Inpp5e     | 1699.41 | -0.2944 | 0.12899 | -2.2822 | 0.02248  | 0.11025  | 2027.95 | 1637.47 | 1951.2  | 1508.16 | 1441.39 | 1630.29 | Down |
| Surf4      | 12694   | 0.23145 | 0.09715 | 2.38237 | 0.0172   | 0.09251  | 11694.7 | 12344.2 | 10994.8 | 14305.6 | 14010   | 12814.7 | Up   |
| Dbhos      | 3.10708 | -5.0572 | 1.79731 | -2.8137 | 0.0049   | NA       | 3.91685 | 8.87787 | 5.84776 | 0       | 0       | 0       | Down |
| Brd3os     | 411.001 | -0.7819 | 0.18419 | -4.2449 | 2.19E-05 | 0.00053  | 552.276 | 414.3   | 592.573 | 317.131 | 289.514 | 300.212 | Down |
| Olfm1      | 1822.87 | 0.31686 | 0.10711 | 2.95824 | 0.00309  | 0.0263   | 1710.68 | 1626.62 | 1533.09 | 1991.5  | 2166.72 | 1908.63 | Up   |
| Ppp1r26    | 716.619 | -0.3492 | 0.14967 | -2.3333 | 0.01963  | 0.10086  | 872.479 | 673.731 | 862.545 | 655.677 | 611.997 | 623.287 | Down |
| 1700007K   | 3715.05 | -1.1547 | 0.29929 | -3.8581 | 0.00011  | 0.00207  | 6177.85 | 3618.22 | 5585.59 | 2640.04 | 1330.12 | 2938.5  | Down |
| Mrs2       | 1213.09 | -0.2742 | 0.10838 | -2.5299 | 0.01141  | 0.068    | 1392.44 | 1235.01 | 1356.68 | 1062.54 | 1079.75 | 1152.14 | Down |
| Gbg1       | 92.4576 | 1.20883 | 0.28719 | 4.20913 | 2.56E-05 | 0.0006   | 72.4617 | 43.4029 | 51.6552 | 133.583 | 117.454 | 136.189 | Up   |
| Gm10134    | 412.731 | 0.8084  | 0.16733 | 4.83128 | 1.36E-06 | 5.20E-05 | 321.182 | 321.576 | 257.302 | 546.567 | 562.543 | 467.217 | Up   |
| Ralgds     | 4629.75 | 0.23194 | 0.1023  | 2.26718 | 0.02338  | 0.11338  | 4543.55 | 4221.92 | 4009.62 | 4971.11 | 5318.4  | 4713.92 | Up   |
| Spaca9     | 1410.74 | -0.778  | 0.26155 | -2.9745 | 0.00293  | 0.02526  | 2159.16 | 1167.93 | 2019.43 | 1146.16 | 776.845 | 1194.88 | Down |
| Ak8        | 1173.46 | -1.0496 | 0.28591 | -3.6711 | 0.00024  | 0.00371  | 1771.4  | 933.162 | 2042.82 | 763.766 | 614.058 | 915.546 | Down |
| Barhl1     | 201.59  | -0.6815 | 0.29764 | -2.2895 | 0.02205  | 0.10895  | 259.491 | 179.53  | 306.033 | 176.411 | 107.151 | 180.922 | Down |
| Cfap77     | 1123.27 | -0.9617 | 0.31035 | -3.0988 | 0.00194  | 0.01836  | 1861.48 | 914.42  | 1677.33 | 856.561 | 490.422 | 939.404 | Down |
| Coq4       | 974.282 | -0.5199 | 0.14748 | -3.5255 | 0.00042  | 0.00564  | 1236.75 | 1031.81 | 1175.4  | 889.191 | 694.421 | 818.127 | Down |
| Cercam     | 167.068 | 0.54223 | 0.27106 | 2.00044 | 0.04545  | 0.17923  | 114.568 | 181.503 | 112.082 | 165.194 | 215.332 | 213.727 | Up   |
| Wdr34      | 1792.54 | -0.8556 | 0.2253  | -3.7974 | 0.00015  | 0.00251  | 2568.48 | 1716.39 | 2642.21 | 1424.54 | 959.208 | 1444.4  | Down |
| Tbcd13     | 2272.68 | 0.28376 | 0.12968 | 2.18809 | 0.02866  | 0.13095  | 1944.72 | 2227.36 | 1977.52 | 2390.21 | 2817.87 | 2278.43 | Up   |
| Endog      | 2846.11 | -0.9601 | 0.22389 | -4.2882 | 1.80E-05 | 0.00045  | 3950.14 | 2736.36 | 4592.44 | 2311.69 | 1548.54 | 1937.46 | Down |
| Kyat1      | 1248.09 | -0.5876 | 0.1108  | -5.3028 | 1.14E-07 | 6.22E-06 | 1517.78 | 1399.74 | 1578.9  | 1023.79 | 934.481 | 1033.84 | Down |
| Sh3glb2    | 3605.43 | -0.2673 | 0.12724 | -2.1005 | 0.03569  | 0.15275  | 3740.59 | 3739.55 | 4335.14 | 3670.97 | 3052.77 | 3093.57 | Down |
| Crat       | 4149.4  | 0.22055 | 0.11046 | 1.99654 | 0.04587  | 0.18033  | 3659.32 | 4261.38 | 3577.86 | 4562.2  | 4560.1  | 4275.53 | Up   |
| Ier5l      | 315.137 | -0.4747 | 0.17874 | -2.6561 | 0.00791  | 0.05199  | 381.893 | 346.237 | 371.333 | 235.554 | 314.241 | 241.561 | Down |
| Gm14487    | 22.3781 | -1.5892 | 0.69962 | -2.2715 | 0.02312  | 0.11243  | 50.9191 | 11.8372 | 38.0105 | 6.11829 | 15.4545 | 11.9289 | Down |
| Gm14488    | 32.0009 | -1.1764 | 0.53171 | -2.2125 | 0.02693  | 0.12526  | 62.6696 | 20.715  | 49.706  | 18.3549 | 22.6666 | 17.8934 | Down |
| Tor1b      | 3349.95 | 0.22593 | 0.07821 | 2.88867 | 0.00387  | 0.03099  | 3132.5  | 3072.73 | 3059.36 | 3525.15 | 3633.86 | 3676.1  | Up   |
| BC005624   | 3693.17 | -0.341  | 0.12845 | -2.6551 | 0.00793  | 0.05207  | 4524.94 | 3639.93 | 4218.19 | 3246.77 | 2999.2  | 3529.97 | Down |
| Ncs1       | 823.364 | -0.9146 | 0.30489 | -2.9996 | 0.0027   | 0.02374  | 1175.06 | 674.718 | 1378.12 | 576.139 | 393.574 | 742.577 | Down |
| Hmcn2      | 247.916 | -1.1996 | 0.3501  | -3.4263 | 0.00061  | 0.00755  | 372.101 | 206.164 | 458.075 | 173.352 | 97.8784 | 179.928 | Down |
| Ass1       | 1057.17 | -0.4018 | 0.20096 | -1.9995 | 0.04556  | 0.17944  | 1058.53 | 999.253 | 1552.58 | 850.442 | 860.299 | 1021.91 | Down |
| Lamc3      | 649.322 | 0.43906 | 0.18014 | 2.43731 | 0.0148   | 0.08265  | 447.5   | 545.496 | 660.797 | 817.811 | 701.633 | 722.695 | Up   |
| Nup214     | 2543.32 | 0.39107 | 0.13522 | 2.89218 | 0.00383  | 0.03077  | 2128.81 | 2508.49 | 1964.85 | 2702.24 | 3139.32 | 2816.22 | Up   |
| Plpp7      | 139.1   | -0.8656 | 0.23684 | -3.6548 | 0.00026  | 0.00389  | 198.78  | 164.734 | 175.433 | 81.5772 | 94.7875 | 119.289 | Down |
| Prrc2b     | 4486.81 | 0.31    | 0.12444 | 2.4911  | 0.01273  | 0.07372  | 4212.57 | 4123.28 | 3684.09 | 4423.52 | 4971.19 | 5506.2  | Up   |
| Uck1       | 2663.16 | -0.4519 | 0.12338 | -3.6626 | 0.00025  | 0.00379  | 3186.36 | 2910.95 | 3133.43 | 2451.39 | 1963.75 | 2333.1  | Down |
| Swi5       | 4206.73 | -0.3032 | 0.13165 | -2.3027 | 0.0213   | 0.10668  | 4959.71 | 4024.63 | 4956.95 | 4023.97 | 3432.95 | 3833.17 | Down |
| Lcn2       | 60861.3 | 1.42916 | 0.28331 | 5.04456 | 4.55E-07 | 2.06E-05 | 26509.2 | 29688.6 | 42685.8 | 92226.1 | 54227.7 | 119830  | Up   |
| Ptges2     | 1349.16 | -0.2782 | 0.1387  | -2.0054 | 0.04492  | 0.17779  | 1605.91 | 1492.47 | 1338.16 | 1349.08 | 1077.69 | 1231.66 | Down |
| St6galnaci | 1548.33 | -0.3    |         |         |          |          |         |         |         |         |         |         |      |

|          |         |         |         |         |          |          |         |         |         |         |         |         |      |
|----------|---------|---------|---------|---------|----------|----------|---------|---------|---------|---------|---------|---------|------|
| Lmx1b    | 75.4899 | -1.0896 | 0.5219  | -2.0877 | 0.03682  | 0.1562   | 151.778 | 36.4979 | 119.879 | 57.104  | 33.9998 | 53.6802 | Down |
| C1300211 | 216.545 | -1.6393 | 0.43908 | -3.7335 | 0.00019  | 0.00305  | 521.92  | 132.182 | 329.424 | 129.504 | 94.7875 | 91.4552 | Down |
| C230014C | 162.626 | 1.05906 | 0.20888 | 5.07004 | 3.98E-07 | 1.84E-05 | 103.797 | 93.7108 | 118.905 | 194.766 | 235.938 | 228.638 | Up   |
| Al182371 | 527.733 | -0.7221 | 0.27874 | -2.5907 | 0.00958  | 0.05987  | 693.283 | 852.275 | 425.912 | 378.314 | 324.544 | 492.069 | Down |
| Ggta1    | 3567.12 | 0.45273 | 0.15147 | 2.98895 | 0.0028   | 0.02436  | 3096.27 | 3358.79 | 2580.81 | 3901.43 | 4717.74 | 3747.68 | Up   |
| Ttll11   | 336.15  | -0.5354 | 0.14428 | -3.711  | 0.00021  | 0.00327  | 384.831 | 384.708 | 423.963 | 260.027 | 275.09  | 288.283 | Down |
| Morn5    | 322.286 | -1.0659 | 0.29724 | -3.5862 | 0.00034  | 0.00476  | 503.315 | 269.295 | 536.045 | 239.633 | 161.757 | 223.668 | Down |
| Ptgs1    | 8340.23 | 0.65076 | 0.14269 | 4.56053 | 5.10E-06 | 0.00016  | 5684.33 | 7739.53 | 6047.56 | 9882.06 | 10636.8 | 10051.1 | Up   |
| Strbp    | 3600.98 | -0.5052 | 0.19387 | -2.6059 | 0.00916  | 0.05801  | 4582.72 | 3456.45 | 4636.3  | 3134.6  | 2300.66 | 3495.18 | Down |
| Nek6     | 3998.24 | 0.5799  | 0.17759 | 3.26534 | 0.00109  | 0.01183  | 3078.64 | 3868.78 | 2668.53 | 4717.2  | 5507.98 | 4148.29 | Up   |
| Nr6a1    | 1186.22 | 0.27848 | 0.10031 | 2.77628 | 0.0055   | 0.04006  | 1067.34 | 1037.72 | 1111.08 | 1272.6  | 1363.08 | 1265.46 | Up   |
| Olfrml2a | 1331.31 | -0.613  | 0.22074 | -2.7768 | 0.00549  | 0.04002  | 1812.52 | 1386.92 | 1630.55 | 1064.58 | 756.239 | 1337.04 | Down |
| Wdr38    | 180.424 | -0.6711 | 0.3273  | -2.0504 | 0.04032  | 0.16567  | 248.72  | 173.612 | 242.682 | 165.194 | 80.3633 | 171.976 | Down |
| Kynu     | 615.224 | 1.63866 | 0.21488 | 7.62586 | 2.42E-14 | 5.59E-12 | 266.346 | 357.088 | 273.87  | 836.166 | 1174.54 | 783.334 | Up   |
| Rnd3     | 828.555 | 0.5295  | 0.14455 | 3.663   | 0.00025  | 0.00379  | 678.594 | 752.646 | 603.294 | 1045.21 | 1013.81 | 877.771 | Up   |
| Nmi      | 1700.62 | 0.28912 | 0.12607 | 2.29335 | 0.02183  | 0.10825  | 1455.11 | 1698.63 | 1438.55 | 1906.87 | 1997.75 | 1706.83 | Up   |
| Arl5a    | 3930.19 | 0.22687 | 0.09019 | 2.51537 | 0.01189  | 0.07008  | 3447.81 | 3801.7  | 3615.87 | 4259.35 | 4377.74 | 4078.7  | Up   |
| Rprm     | 756.344 | 1.27349 | 0.23628 | 5.38978 | 7.05E-08 | 4.17E-06 | 412.249 | 525.767 | 389.851 | 1028.89 | 1393.99 | 787.31  | Up   |
| Galnt13  | 570.937 | 1.98479 | 0.20715 | 9.5814  | 9.57E-22 | 7.88E-19 | 236.969 | 219.974 | 233.911 | 960.571 | 1096.24 | 677.962 | Up   |
| Nr4a2    | 1092.48 | 0.53357 | 0.18845 | 2.83142 | 0.00463  | 0.03541  | 843.102 | 955.85  | 879.114 | 1329.71 | 1562.96 | 984.138 | Up   |
| Gpd2     | 2264.19 | 0.25808 | 0.12889 | 2.00233 | 0.04525  | 0.17868  | 2272.75 | 2104.05 | 1809.88 | 2276    | 2572.66 | 2549.81 | Up   |
| Cytip    | 6906.11 | 0.25402 | 0.11203 | 2.26752 | 0.02336  | 0.11334  | 6943.6  | 5997.49 | 5957.9  | 8066.96 | 7350.15 | 7120.58 | Up   |
| Upp2     | 906.996 | -0.4055 | 0.16916 | -2.397  | 0.01653  | 0.08976  | 1133.93 | 829.587 | 1137.39 | 780.082 | 715.027 | 845.961 | Down |
| Ccdc148  | 360.74  | -0.7023 | 0.28778 | -2.4406 | 0.01466  | 0.08216  | 533.671 | 325.522 | 481.466 | 280.422 | 186.484 | 356.874 | Down |
| Cd302    | 4507.59 | 0.55085 | 0.13029 | 4.22796 | 2.36E-05 | 0.00056  | 3320.51 | 4146.95 | 3504.76 | 5163.84 | 5046.4  | 5863.08 | Up   |
| Ly75     | 2794.68 | 1.29536 | 0.15693 | 8.25452 | 1.53E-16 | 5.34E-14 | 1563.8  | 1621.69 | 1668.56 | 3430.32 | 4841.37 | 3642.3  | Up   |
| Gm13580  | 48.2106 | -1.2461 | 0.57312 | -2.1742 | 0.02969  | 0.13412  | 85.1915 | 33.5386 | 84.7926 | 33.6506 | 11.3333 | 40.7572 | Down |
| Tank     | 2954.76 | 0.23882 | 0.09756 | 2.44789 | 0.01437  | 0.08101  | 2772.15 | 2834.01 | 2526.23 | 3160.1  | 3092.96 | 3343.09 | Up   |
| Fign     | 560.947 | -1.113  | 0.24991 | -4.4534 | 8.45E-06 | 0.00024  | 662.927 | 600.736 | 1037.98 | 359.959 | 290.544 | 413.537 | Down |
| Slc38a11 | 444.626 | -0.2065 | 0.78036 | -2.661  | 0.00779  | 0.05139  | 1211.29 | 231.811 | 713.427 | 182.529 | 75.2118 | 253.49  | Down |
| Scn3a    | 598.955 | -0.5374 | 0.19686 | -2.7297 | 0.00634  | 0.0444   | 766.724 | 762.51  | 598.421 | 395.649 | 588.3   | 482.128 | Down |
| Galnt3   | 3052.83 | 0.70912 | 0.18213 | 3.89353 | 9.88E-05 | 0.00185  | 2793.69 | 1743.02 | 2415.13 | 3750.51 | 4015.07 | 3599.56 | Up   |
| Stk39    | 2206.97 | 0.3236  | 0.13461 | 2.40401 | 0.01622  | 0.08846  | 2114.12 | 1896.9  | 1870.31 | 2274.98 | 2821.99 | 2263.52 | Up   |
| Cers6    | 1477.22 | 0.85807 | 0.09529 | 9.0047  | 2.16E-19 | 1.05E-16 | 1007.61 | 1098.88 | 1044.8  | 1865.06 | 1948.29 | 1898.69 | Up   |
| Dhrs9    | 224.938 | -1.4562 | 0.47095 | -3.092  | 0.00199  | 0.01871  | 623.759 | 151.91  | 213.443 | 114.208 | 134.969 | 111.337 | Down |
| Lrp2     | 13561.7 | 0.57212 | 0.24114 | 2.37252 | 0.01767  | 0.09426  | 11520.4 | 14300.3 | 6901.34 | 14644.1 | 17201.9 | 16801.9 | Up   |
| Bbs5     | 1049.74 | -0.4604 | 0.17173 | -2.6811 | 0.00734  | 0.04923  | 1335.65 | 991.362 | 1320.62 | 852.482 | 793.33  | 1005.01 | Down |
| Klhl41   | 94.9657 | -0.9321 | 0.42833 | -2.1762 | 0.02954  | 0.13362  | 160.591 | 72.0094 | 141.321 | 43.8477 | 54.6058 | 97.4197 | Down |
| Ccdc173  | 666.766 | -0.9523 | 0.30151 | -3.1584 | 0.00159  | 0.01567  | 1027.19 | 596.79  | 1013.61 | 463.97  | 293.635 | 605.394 | Down |
| Mettl5os | 10.3823 | -1.5013 | 0.72842 | -2.0611 | 0.03929  | 0.16307  | 19.5843 | 9.8643  | 16.5687 | 6.11829 | 6.18179 | 3.97631 | Down |
| Myo3b    | 162.135 | -0.6425 | 0.23632 | -2.7187 | 0.00655  | 0.04552  | 161.57  | 219.974 | 211.494 | 132.563 | 104.06  | 143.147 | Down |
| Rpl9-ps7 | 193.307 | -0.725  | 0.32264 | -2.2473 | 0.02462  | 0.11743  | 329.995 | 240.689 | 152.042 | 136.642 | 120.545 | 179.928 | Down |
| Sp5      | 434.893 | 0.87508 | 0.3357  | 2.60671 | 0.00914  | 0.05794  | 336.849 | 410.355 | 173.484 | 637.322 | 667.633 | 383.714 | Up   |
| Cybrd1   | 1053.9  | -0.8507 | 0.1694  | -5.0222 | 5.11E-07 | 2.26E-05 | 1332.71 | 1583.22 | 1152.01 | 669.953 | 733.572 | 851.925 | Down |
| Gm13647  | 5.07598 | -3.7998 | 1.44334 | -2.6327 | 0.00847  | NA       | 7.8337  | 7.89144 | 12.6702 | 0       | 0.0606  | 0       | Down |
| Itga6    | 6279.44 | -0.222  | 0.10973 | -2.0228 | 0.0431   | 0.17303  | 7311.78 | 6411.79 | 6561.19 | 5376.96 | 5754.22 | 6260.71 | Down |
| Cir1     | 659.775 | 0.31564 | 0.12301 | 2.56598 | 0.01029  | 0.06325  | 585.569 | 554.373 | 623.761 | 744.392 | 684.118 | 766.435 | Up   |
| Scrn3    | 2033.33 | -0.3883 | 0.09698 | -4.0034 | 6.24E-05 | 0.00125  | 2395.15 | 2148.44 | 2372.24 | 1802.86 | 1724.72 | 1756.54 | Down |
| Gpr155   | 2764.26 | -0.9539 | 0.27518 | -3.4665 | 0.00053  | 0.00673  | 3335.2  | 2311.2  | 5292.23 | 2141.4  | 1622.72 | 1882.78 | Down |
| Gm13657  | 155.948 | -0.6737 | 0.21071 | -3.1973 | 0.00139  | 0.01415  | 188.009 | 188.408 | 198.824 | 108.09  | 109.212 | 143.147 | Down |
| Ttc30b   | 2075.12 | -0.459  | 0.23107 | -1.9865 | 0.04698  | 0.18333  | 2241.42 | 1904.8  | 3061.3  | 1923.18 | 1295.09 | 2024.94 | Down |
| Pde11a   | 22.4036 | -1.5919 | 0.48769 | -3.2641 | 0.0011   | 0.01186  | 33.2932 | 32.5522 | 35.0866 | 14.276  | 9.27269 | 9.94079 | Down |
| Osbpl6   | 6310.67 | -0.4314 | 0.18888 | -2.2839 | 0.02238  | 0.10995  | 7226.59 | 5857.42 | 8657.61 | 6235.56 | 4044.53 | 5482.34 | Down |
| Ttn      | 640.806 | -2.645  | 1.25511 | -2.1074 | 0.03509  | 0.15086  | 1828.19 | 115.412 | 1371.3  | 114.208 | 33.9998 | 381.726 | Down |
| Zfp385b  | 507.17  | 0.54034 | 0.21343 | 2.53171 | 0.01135  | 0.06776  | 376.997 | 518.862 | 344.043 | 500.68  | 684.118 | 618.317 | Up   |
| Itga4    | 879.71  | 0.36334 | 0.17594 | 2.06516 | 0.03891  | 0.16209  | 942.982 | 744.754 | 620.838 | 964.65  | 989.087 | 1015.95 | Up   |
| Ppp1r1c  | 3.74864 | -5.3284 | 1.97526 | -2.6976 | 0.00699  | NA       | 0.97921 | 5.91858 | 15.594  | 0       | 0       | 0       | Down |
| Nup35    | 1641.4  | -0.2158 | 0.10764 | -2.0048 | 0.04499  | 0.17799  | 1920.24 | 1651.28 | 1720.22 | 1567.3  | 1503.21 | 1486.15 | Down |
| Gm4735   | 1033.25 | -0.8119 | 0.12671 | -6.4076 | 1.48E-10 | 1.54E-08 | 1348.38 | 1289.26 | 1311.85 | 688.308 | 847.936 | 713.748 | Down |
| Itgav    | 3964.92 | 0.40803 | 0.08925 | 4.5719  | 4.83E-06 | 0.00015  | 3453.68 | 3536.35 | 3233.81 | 4370.5  | 4693.01 | 4502.18 | Up   |
| Gm13711  | 12.3588 | 6.11812 | 1.77112 | 3.45438 | 0.00055  | 0.00694  | 0.97921 | 0       | 0       | 62.2026 | 1.0303  | 9.94079 | Up   |
| Calcr1   | 39176.3 | 0.51786 | 0.16399 | 3.1579  | 0.00159  | 0.01569  | 26237   | 38719.3 | 31702.7 | 46249.2 | 50213.7 | 41936.2 | Up   |
| Tnks1bp1 | 8309.85 | 0.22265 | 0.10849 | 2.0522  | 0.04015  | 0.16534  | 7311.78 | 7134.85 | 8563.08 | 8758.33 | 8902.81 | 9188.27 | Up   |
| Agbl2    | 1952.71 | -0.8608 | 0.29317 | -2.9362 | 0.00332  | 0.02769  | 2772.15 | 1811.08 | 2972.61 | 1494.9  | 831.451 | 1834.07 | Down |
| C1qtnf4  | 83.6047 | -0.9969 | 0.26043 | -3.8279 | 0.00013  | 0.0023   | 124.36  | 102.589 | 107.209 | 62.2026 | 53.5755 | 51.6921 | Down |
| Slc39a13 | 318.064 | 0.32901 | 0.15773 | 2.08588 | 0.03699  | 0.15664  | 310.41  | 281.132 | 254.378 | 339.565 | 345.15  | 377.75  | Up   |
| Spi1     | 2380.27 | 1.00988 | 0.2408  | 4.19386 | 2.74E-05 | 0.00064  | 1395.38 | 2075.45 | 1267.99 | 3060.16 | 4022.29 | 2460.34 | Up   |
| Madd     | 3065.07 | 0.23364 | 0.11214 | 2.08351 | 0.0372   | 0.15704  | 2728.09 | 3121.06 | 2603.23 | 3163.16 | 3343.32 | 3431.56 | Up   |
| Acp2     | 1440.6  | 0.53051 | 0.10232 | 5.18482 | 2.16E-07 | 1.08E-05 | 1182.89 | 1176.81 | 1176.38 | 1574.44 | 1757.69 | 1775.42 | Up   |
| 1110051N | 2403.42 | -0.3838 | 0.13956 | -2.7498 | 0.00596  | 0.04253  | 2647.79 | 2402.94 | 3112.96 | 2136.3  | 1896.78 | 2223.75 | Down |
| F2       | 55.357  | -1.7307 | 0.50272 | -3.3238 | 0.00089  | 0.00998  | 100.859 | 34.525  | 119.879 | 25.4929 | 19.5757 | 31.8105 | Down |
| Creb3l1  | 1239.16 | 0.5855  | 0.18324 | 3.1952  | 0.0014   | 0.0142   | 1202.47 | 968.674 | 802.118 | 1574.44 | 1595.93 | 1291.31 | Up   |
| Slc35c1  | 2132.58 | 0.2724  | 0.1154  | 2.36045 | 0.01825  | 0.09622  | 2103.35 | 1819.96 | 1872.26 | 2472.81 | 2150.23 | 2376.84 | Up   |
| Prdm11   | 636.094 | 0.27544 | 0.11389 | 2.41844 | 0.01559  | 0.08595  | 586.548 | 551.414 | 588.675 | 669.953 | 719.148 | 700.825 | Up   |
| Gm27027  | 27.4206 | -1.0417 | 0.52271 | -1.9928 | 0.04628  | 0.18146  | 41.1269 | 33.5386 | 36.0612 | 8.15772 | 25.7575 | 19.8816 | Down |
| Hsd17b12 | 6633.98 | 0.30768 | 0.09548 | 3.2223  | 0.00127  | 0.01328  | 6200.38 | 5855.45 | 5731.78 | 7147.18 | 7879.72 | 6989.37 | Up   |
| Mir670hg | 25.173  | -1.3176 | 0.65309 | -2.0174 | 0.04365  | 0.17454  | 38.1893 | 39.4572 | 30.2134 | 7.138   | 7.212   |         |      |

|          |         |         |         |         |          |          |         |         |         |         |         |         |      |
|----------|---------|---------|---------|---------|----------|----------|---------|---------|---------|---------|---------|---------|------|
| Elf5     | 1647.9  | -0.3629 | 0.13286 | -2.7318 | 0.0063   | 0.04429  | 1783.15 | 2082.35 | 1696.83 | 1571.38 | 1331.15 | 1422.53 | Down |
| Cd59a    | 1712.84 | -0.7655 | 0.22629 | -3.3829 | 0.00072  | 0.00844  | 2068.1  | 2118.85 | 2283.55 | 1128.82 | 1744.3  | 933.44  | Down |
| Dcdc5    | 423.55  | -0.7417 | 0.31713 | -2.3387 | 0.01935  | 0.09986  | 612.008 | 304.807 | 673.467 | 372.196 | 233.878 | 344.945 | Down |
| Gm14015  | 20.5509 | -1.6803 | 0.60578 | -2.7738 | 0.00554  | 0.04026  | 35.2517 | 23.6743 | 35.0866 | 4.07886 | 10.303  | 14.9112 | Down |
| Mpped2   | 218.675 | -0.519  | 0.19751 | -2.6276 | 0.0086   | 0.0554   | 238.928 | 299.875 | 233.911 | 188.647 | 191.636 | 159.053 | Down |
| Mettl15  | 366.699 | -0.5757 | 0.15196 | -3.7885 | 0.00015  | 0.00258  | 423.999 | 403.45  | 489.263 | 306.934 | 282.302 | 294.247 | Down |
| Ccdc34   | 120.328 | -0.7625 | 0.3418  | -2.2308 | 0.02569  | 0.12109  | 176.258 | 96.6701 | 181.281 | 115.228 | 69.03   | 83.5026 | Down |
| Bbox1    | 973.274 | -1.5213 | 0.39181 | -3.8828 | 0.0001   | 0.00192  | 1767.48 | 837.479 | 1726.06 | 512.917 | 244.181 | 751.523 | Down |
| Fibin    | 2148.44 | -0.3419 | 0.15657 | -2.1835 | 0.029    | 0.13197  | 2134.68 | 2823.16 | 2247.49 | 2019.04 | 2010.11 | 1656.13 | Down |
| A26c3    | 84.0155 | -1.5432 | 0.26351 | -5.8562 | 4.73E-09 | 3.75E-07 | 118.485 | 125.277 | 131.575 | 47.9266 | 37.0907 | 43.7395 | Down |
| Lpcat4   | 2192.61 | 0.48504 | 0.19878 | 2.44006 | 0.01468  | 0.08222  | 2036.76 | 1323.79 | 2121.76 | 2870.5  | 2388.23 | 2414.62 | Up   |
| Arhgap11 | 597.426 | 0.76099 | 0.15397 | 4.94251 | 7.71E-07 | 3.20E-05 | 383.851 | 496.174 | 450.278 | 683.209 | 774.784 | 796.257 | Up   |
| Dph6     | 1279.49 | -0.2932 | 0.11667 | -2.5128 | 0.01198  | 0.07048  | 1541.28 | 1288.28 | 1397.62 | 1128.82 | 1124.06 | 1196.87 | Down |
| Gm13986  | 56.6568 | -0.7908 | 0.36222 | -2.1833 | 0.02902  | 0.13197  | 71.4825 | 59.1858 | 84.7926 | 48.9463 | 27.8181 | 47.7158 | Down |
| Thbs1    | 9963.2  | 0.72598 | 0.29113 | 2.49371 | 0.01264  | 0.07332  | 8083.4  | 8751.6  | 5688.9  | 11576.8 | 18025.1 | 7653.41 | Up   |
| Fsip1    | 615.875 | -0.8349 | 0.30312 | -2.7544 | 0.00588  | 0.04209  | 850.936 | 525.767 | 991.196 | 478.246 | 287.453 | 561.654 | Down |
| Gpr176   | 24.7845 | 1.43379 | 0.53664 | 2.67181 | 0.00754  | 0.05019  | 17.6258 | 10.8507 | 11.6955 | 21.414  | 46.3634 | 40.7572 | Up   |
| Bmf      | 2106.75 | 0.73023 | 0.11983 | 6.09397 | 1.10E-09 | 9.69E-08 | 1441.4  | 1785.44 | 1527.24 | 2558.46 | 2705.56 | 2622.38 | Up   |
| Bub1b    | 472.034 | 0.63655 | 0.22557 | 2.82197 | 0.00477  | 0.03605  | 335.87  | 488.283 | 284.591 | 521.074 | 581.088 | 621.299 | Up   |
| Pcb2     | 1304.24 | 1.21929 | 0.2438  | 5.00124 | 5.70E-07 | 2.51E-05 | 731.472 | 962.755 | 656.899 | 1618.29 | 2459.32 | 1396.68 | Up   |
| Ccdc9b   | 2233.54 | 0.3314  | 0.11248 | 2.94622 | 0.00322  | 0.02699  | 1860.5  | 1942.28 | 2131.51 | 2344.32 | 2690.11 | 2432.51 | Up   |
| Phgr1    | 319.963 | 0.56838 | 0.28226 | 2.01364 | 0.04405  | 0.17551  | 214.448 | 349.196 | 209.545 | 358.94  | 490.422 | 297.229 | Up   |
| Gchfr    | 85.214  | -0.6286 | 0.27344 | -2.2989 | 0.02151  | 0.10714  | 114.568 | 80.8872 | 115.006 | 65.2168 | 66.9694 | 68.5914 | Down |
| Ppp1r14d | 676.05  | 0.49176 | 0.16659 | 2.95199 | 0.00316  | 0.02666  | 534.65  | 495.188 | 655.924 | 886.132 | 713.997 | 770.411 | Up   |
| Rhov     | 173.149 | -0.9794 | 0.32841 | -2.9822 | 0.00286  | 0.02479  | 197.801 | 194.327 | 297.261 | 117.267 | 74.1815 | 158.058 | Down |
| Vps18    | 1748.69 | 0.3567  | 0.14359 | 2.48412 | 0.01299  | 0.07489  | 1474.69 | 1662.13 | 1463.89 | 1916.04 | 2264.6  | 1710.81 | Up   |
| Chp1     | 13683.6 | 0.4525  | 0.13258 | 3.41307 | 0.00064  | 0.00783  | 11947.4 | 12392.5 | 10325.2 | 15200.9 | 17910.7 | 14324.7 | Up   |
| Itpka    | 1075.68 | -0.9094 | 0.25007 | -3.6365 | 0.00028  | 0.00409  | 1375.79 | 1043.64 | 1792.34 | 803.535 | 546.058 | 892.683 | Down |
| Ltk      | 383.5   | -0.7779 | 0.20616 | -3.7734 | 0.00016  | 0.0027   | 517.024 | 392.599 | 543.842 | 290.619 | 232.847 | 324.07  | Down |
| Mapkbp1  | 743.254 | 0.27971 | 0.13894 | 2.01311 | 0.0441   | 0.17562  | 744.202 | 581.007 | 689.061 | 792.318 | 813.936 | 839.002 | Up   |
| Pla2g4f  | 1631.88 | 0.77314 | 0.25583 | 3.02214 | 0.00251  | 0.02248  | 1042.86 | 1667.07 | 904.454 | 1790.62 | 2585.02 | 1801.27 | Up   |
| Tmem87a  | 4263.98 | 0.22828 | 0.08777 | 2.60074 | 0.0093   | 0.05851  | 3883.56 | 3844.12 | 4054.45 | 4423.52 | 4527.13 | 4851.1  | Up   |
| Snap23   | 5151.6  | 0.25395 | 0.10914 | 2.32692 | 0.01997  | 0.10219  | 4640.49 | 5119.57 | 4338.07 | 5235.22 | 5830.46 | 5745.77 | Up   |
| Epb42    | 51.6404 | -1.3563 | 0.48712 | -2.7842 | 0.00537  | 0.03931  | 43.0854 | 118.372 | 61.4015 | 30.5914 | 20.606  | 35.7868 | Down |
| Tgm5     | 12.0037 | -1.9125 | 0.9021  | -2.1201 | 0.034    | 0.14768  | 22.5219 | 25.6472 | 8.77165 | 1.01971 | 4.12119 | 9.94079 | Down |
| Tubgcp4  | 453.567 | 0.37944 | 0.15304 | 2.47934 | 0.01316  | 0.07565  | 410.29  | 380.762 | 391.8   | 444.596 | 522.361 | 571.595 | Up   |
| Map1a    | 608.474 | -0.5615 | 0.17017 | -3.2998 | 0.00097  | 0.01072  | 774.557 | 583.966 | 817.712 | 510.877 | 465.695 | 498.033 | Down |
| Ppip5k1  | 2323.21 | 0.21538 | 0.09537 | 2.25845 | 0.02392  | 0.11517  | 2242.4  | 2062.62 | 2145.15 | 2553.37 | 2575.75 | 2359.94 | Up   |
| Ckmt1    | 8718.67 | 1.38451 | 0.2067  | 6.6982  | 2.11E-11 | 2.75E-09 | 4618.95 | 4267.29 | 5601.18 | 13003.4 | 15611.1 | 9210.14 | Up   |
| Strc     | 118.398 | -0.9009 | 0.44485 | -2.0253 | 0.04284  | 0.17231  | 176.258 | 70.0365 | 216.367 | 89.7349 | 54.6058 | 103.384 | Down |
| Frmd5    | 185.854 | -1.4374 | 0.43167 | -3.3298 | 0.00087  | 0.00982  | 447.5   | 121.331 | 245.606 | 89.7349 | 90.6663 | 120.284 | Down |
| Spg11    | 1273.81 | 0.30145 | 0.09883 | 3.05032 | 0.00229  | 0.02095  | 1135.89 | 1175.82 | 1112.05 | 1358.26 | 1382.66 | 1478.19 | Up   |
| Gatm     | 428.784 | 0.6577  | 0.18974 | 3.46636 | 0.00053  | 0.00673  | 302.577 | 388.653 | 307.008 | 486.404 | 467.755 | 620.305 | Up   |
| Dtwd1    | 505.353 | -0.4075 | 0.16242 | -2.5092 | 0.0121   | 0.07101  | 558.151 | 495.188 | 675.417 | 439.497 | 424.483 | 439.383 | Down |
| Atp8b4   | 442.138 | 0.3793  | 0.17697 | 2.14335 | 0.03209  | 0.14163  | 364.267 | 343.278 | 445.405 | 456.832 | 572.846 | 470.199 | Up   |
| Slc27a2  | 930.275 | 0.81474 | 0.32468 | 2.50938 | 0.01209  | 0.07099  | 668.802 | 368.925 | 985.348 | 1176.75 | 933.45  | 1448.37 | Up   |
| Gabpb1   | 2895.16 | 0.48077 | 0.13944 | 3.44786 | 0.00057  | 0.00709  | 2330.53 | 2692.95 | 2228    | 3343.65 | 3795.62 | 2980.25 | Up   |
| Usp50    | 78.9124 | 1.22039 | 0.34468 | 3.54061 | 0.0004   | 0.00542  | 40.1477 | 55.2401 | 46.7821 | 150.918 | 97.8784 | 82.5085 | Up   |
| Sppi2a   | 8365.76 | 0.33496 | 0.09647 | 3.47219 | 0.00052  | 0.00662  | 7090.48 | 7706.97 | 7399.37 | 8679.81 | 9529.9  | 9392.05 | Up   |
| Blvra    | 1612.69 | 0.53565 | 0.14382 | 3.7244  | 0.0002   | 0.00314  | 1330.75 | 1335.63 | 1283.58 | 2000.68 | 2140.96 | 1584.56 | Up   |
| Tmem127  | 5462.67 | 0.20759 | 0.08491 | 2.44491 | 0.01449  | 0.0815   | 4998.88 | 5221.17 | 4991.07 | 5553.37 | 5969.55 | 6042.01 | Up   |
| Prom2    | 137.621 | -1.1936 | 0.42422 | -2.8136 | 0.0049   | 0.03679  | 186.05  | 137.114 | 251.454 | 87.6955 | 39.1513 | 124.26  | Down |
| Npnhp1   | 2901.04 | -0.7092 | 0.24914 | -2.8466 | 0.00442  | 0.03408  | 4045.13 | 2445.36 | 4309.8  | 2270.91 | 1663.93 | 2671.09 | Down |
| Mtln     | 724.456 | -0.2495 | 0.11773 | -2.1197 | 0.03403  | 0.14769  | 816.663 | 760.537 | 783.6   | 712.781 | 642.906 | 630.246 | Down |
| Bub1     | 208.853 | -0.8337 | 0.30522 | -2.7316 | 0.0063   | 0.04429  | 253.616 | 366.952 | 182.255 | 139.701 | 125.696 | 184.899 | Down |
| Acox1    | 2140.87 | -2.2782 | 0.53162 | -4.2853 | 1.82E-05 | 0.00045  | 3339.12 | 4721.05 | 2589.58 | 673.012 | 353.392 | 1169.04 | Down |
| Morrbid  | 491.261 | 0.37611 | 0.17228 | 2.18319 | 0.02902  | 0.13197  | 440.646 | 492.228 | 349.891 | 541.469 | 594.482 | 528.85  | Up   |
| Mertk    | 3597.03 | 0.64905 | 0.11679 | 5.55751 | 2.74E-08 | 1.77E-06 | 2730.05 | 2553.87 | 3119.78 | 4289.94 | 4651.8  | 4236.76 | Up   |
| Zc3h8    | 572.546 | -0.4363 | 0.19709 | -2.2135 | 0.02686  | 0.12502  | 687.407 | 537.604 | 750.463 | 470.089 | 413.15  | 576.566 | Down |
| Vinac1   | 65.586  | -0.8915 | 0.29824 | -2.9891 | 0.0028   | 0.02436  | 73.441  | 82.8601 | 99.412  | 41.8083 | 44.3028 | 51.6921 | Down |
| Ttl      | 2021.3  | -0.2321 | 0.09122 | -2.5441 | 0.01096  | 0.06603  | 2218.9  | 2166.2  | 2165.62 | 1905.85 | 1756.66 | 1914.6  | Down |
| Il1a     | 15.0411 | 1.19467 | 0.5621  | 2.12538 | 0.03355  | 0.14631  | 8.81291 | 9.8643  | 8.77165 | 20.3943 | 18.5454 | 23.8579 | Up   |
| Sirpa    | 9772.01 | 1.11212 | 0.20688 | 5.37567 | 7.63E-08 | 4.48E-06 | 6240.52 | 7629.05 | 4675.29 | 12775   | 15974.8 | 11337.5 | Up   |
| Cpxm1    | 919.775 | 0.49532 | 0.14493 | 3.41769 | 0.00063  | 0.00773  | 732.451 | 767.442 | 790.423 | 1200.2  | 910.784 | 1117.34 | Up   |
| Mrps26   | 1008.54 | -0.3006 | 0.13718 | -2.1915 | 0.02842  | 0.13027  | 1161.35 | 1048.57 | 1129.59 | 938.138 | 993.208 | 780.352 | Down |
| Lzts3    | 859.026 | 0.42879 | 0.21805 | 1.96646 | 0.04925  | 0.18906  | 897.938 | 555.36  | 743.641 | 1057.44 | 794.36  | 1105.42 | Up   |
| 4930402H | 4397.3  | -0.2352 | 0.11316 | -2.0787 | 0.03764  | 0.15832  | 5073.3  | 4323.52 | 4868.26 | 4030.93 | 3759.56 | 4328.22 | Down |
| Adam33   | 679.755 | 0.92283 | 0.17179 | 5.37183 | 7.79E-08 | 4.54E-06 | 432.812 | 576.075 | 399.597 | 859.62  | 910.784 | 899.641 | Up   |
| Siglec1  | 1091.22 | 1.76572 | 0.21129 | 8.35701 | 6.43E-17 | 2.39E-14 | 500.378 | 587.912 | 399.597 | 1548.95 | 2103.87 | 1406.62 | Up   |
| Gm14232  | 26.3866 | -1.1303 | 0.47266 | -2.3914 | 0.01679  | 0.09082  | 34.2724 | 28.6065 | 45.8075 | 12.2366 | 17.5151 | 19.8816 | Down |
| Spef1    | 2926.01 | -0.5061 | 0.15992 | -3.1651 | 0.00155  | 0.01541  | 3806.2  | 2787.65 | 3708.46 | 2539.09 | 2141.99 | 2572.68 | Down |
| Ap5s1    | 1273.47 | 0.32525 | 0.13779 | 2.36041 | 0.01825  | 0.09622  | 1081.05 | 1182.73 | 1127.64 | 1463.29 | 1574.3  | 1211.78 | Up   |
| Smox     | 1822.69 | -0.3664 | 0.14112 | -2.5965 | 0.00942  | 0.05907  | 2093.56 | 1799.25 | 2266.01 | 1697.83 | 1409.45 | 1670.05 | Down |
| Gm14280  | 33.0297 | -1.1349 | 0.42746 | -2.6551 | 0.00793  | 0.05207  | 48.9606 | 35.5115 | 51.6552 | 24.4732 | 22.6666 | 14.9112 | Down |
| 5330413P | 303.922 | -1.1508 | 0.27139 | -4.2406 | 2.23E-05 | 0.00054  | 471.001 | 316.644 | 469.77  | 183.549 | 137.03  | 245.537 | Down |
| Slc23a2  | 16914.8 | -0.4825 | 0.20496 | -2.354  | 0.01857  | 0.09735  | 20138.5 | 15295.6 | 23717.6 | 13651.9 | 11519.8 | 17165.7 | Down |
| Gm14051  | 380.383 | -1.7337 | 0.4728  | -3.6668 | 0.00025  | 0.00375  | 554.234 | 310.725 |         |         |         |         |      |

|           |         |          |         |         |          |          |         |         |         |         |         |         |      |
|-----------|---------|----------|---------|---------|----------|----------|---------|---------|---------|---------|---------|---------|------|
| Dstn      | 39648.8 | 0.25551  | 0.09423 | 2.7115  | 0.0067   | 0.04609  | 36141.8 | 33666.8 | 38632.3 | 43111.5 | 44790.2 | 41550.5 | Up   |
| Rrbp1     | 14389   | 0.31712  | 0.08709 | 3.64114 | 0.00027  | 0.00404  | 12300.9 | 13561.4 | 12579.5 | 16194.1 | 16376.6 | 15321.7 | Up   |
| Snx5      | 8114.12 | 0.28225  | 0.11118 | 2.53868 | 0.01113  | 0.06683  | 7412.64 | 7814.5  | 6741.5  | 8847.05 | 9628.14 | 8240.91 | Up   |
| Slc24a3   | 2046.2  | -0.37378 | 0.31048 | -2.3762 | 0.01749  | 0.09358  | 3084.52 | 1789.38 | 2801.08 | 1442.9  | 937.572 | 2221.77 | Down |
| Cfap61    | 1900.1  | -1.0358  | 0.30211 | -3.4285 | 0.00061  | 0.00751  | 3016.95 | 1635.5  | 3010.62 | 1279.74 | 803.633 | 1654.15 | Down |
| Ralgapa2  | 6196.97 | 0.81449  | 0.14158 | 5.75268 | 8.78E-09 | 6.54E-07 | 3744.51 | 4560.26 | 5173.32 | 7637.66 | 8250.63 | 7815.45 | Up   |
| Gm14114   | 18.992  | -1.3221  | 0.53454 | -2.4734 | 0.01338  | 0.07656  | 24.4803 | 29.5929 | 27.2896 | 12.2366 | 13.3939 | 6.95855 | Down |
| Xrn2      | 5319.38 | 0.21738  | 0.09063 | 2.39852 | 0.01646  | 0.08952  | 4658.12 | 5211.31 | 4888.73 | 5573.76 | 5921.13 | 5663.27 | Up   |
| Nkx2-2    | 22.1763 | -2.32    | 0.65308 | -3.5524 | 0.00038  | 0.00522  | 28.3972 | 54.2536 | 28.2642 | 5.09857 | 4.12119 | 12.923  | Down |
| Nkx2-2os  | 20.3979 | -2.3272  | 0.60294 | -3.8597 | 0.00011  | 0.00206  | 23.5011 | 46.3622 | 32.1627 | 6.11829 | 9.27269 | 4.97039 | Down |
| 9030622C  | 616.354 | -0.6309  | 0.20269 | -3.1129 | 0.00185  | 0.01764  | 688.387 | 764.483 | 794.321 | 556.764 | 353.392 | 540.779 | Down |
| Cd93      | 14429.5 | 0.28343  | 0.10893 | 2.60202 | 0.00927  | 0.05846  | 12288.1 | 13883   | 12878.7 | 15578.2 | 17313.1 | 14635.8 | Up   |
| Gzfl      | 2632.22 | 0.3767   | 0.11451 | 3.28965 | 0.001    | 0.01103  | 2399.07 | 2433.52 | 2038.92 | 2971.45 | 3105.32 | 2845.05 | Up   |
| Cst8      | 290.123 | -1.5634  | 0.38022 | -4.1118 | 3.93E-05 | 0.00085  | 398.54  | 629.342 | 272.896 | 123.386 | 97.8784 | 218.697 | Down |
| Zfp120    | 913.251 | 0.39275  | 0.10852 | 3.61925 | 0.0003   | 0.00432  | 742.243 | 834.519 | 792.372 | 1007.48 | 1058.12 | 1044.78 | Up   |
| Pygb      | 7570.83 | 0.28167  | 0.11715 | 2.40445 | 0.0162   | 0.08844  | 7290.24 | 6015.25 | 7196.65 | 8584.98 | 8544.27 | 7793.58 | Up   |
| Abhd12    | 5124.66 | 0.48628  | 0.17987 | 2.70344 | 0.00686  | 0.04689  | 4004    | 5162.97 | 3640.23 | 5900.07 | 6967.91 | 5072.78 | Up   |
| Ninl      | 542.622 | 1.08666  | 0.14395 | 7.54896 | 4.39E-14 | 9.43E-12 | 335.87  | 385.694 | 320.652 | 761.727 | 775.815 | 675.973 | Up   |
| Gm14150   | 132.17  | -0.4782  | 0.2179  | -2.1944 | 0.0282   | 0.12942  | 166.466 | 155.856 | 139.372 | 115.228 | 95.8178 | 120.284 | Down |
| Angpt4    | 34.6738 | -1.1711  | 0.38419 | -3.0483 | 0.0023   | 0.02106  | 50.9191 | 44.3893 | 48.7314 | 24.4732 | 21.6363 | 17.8934 | Down |
| Fam110a   | 1582.95 | -0.2661  | 0.12451 | -2.1375 | 0.03256  | 0.14314  | 1688.16 | 1908.74 | 1588.64 | 1489.8  | 1503.21 | 1319.14 | Down |
| Tbcd120   | 6810.2  | 0.33111  | 0.09542 | 3.46992 | 0.00052  | 0.00666  | 6035.87 | 6131.65 | 5928.66 | 7909.93 | 7905.48 | 6949.6  | Up   |
| 6820408C  | 2159.24 | -0.8712  | 0.29277 | -2.9756 | 0.00292  | 0.02519  | 3154.04 | 1805.17 | 3417.04 | 1724.34 | 985.996 | 1868.87 | Down |
| Defb23    | 308.607 | -0.6793  | 0.29247 | -2.3226 | 0.0202   | 0.10291  | 478.835 | 265.35  | 395.699 | 283.481 | 164.848 | 263.431 | Down |
| Defb20    | 13.0081 | -1.9236  | 0.66915 | -2.8746 | 0.00404  | 0.03191  | 23.5011 | 18.7422 | 19.4925 | 6.11829 | 7.21209 | 2.98224 | Down |
| Tpx2      | 287.228 | 0.36576  | 0.18344 | 1.99388 | 0.04617  | 0.18109  | 222.281 | 296.915 | 233.911 | 336.506 | 297.756 | 335.999 | Up   |
| Ttli9     | 655.028 | -1.0967  | 0.26631 | -4.1181 | 3.82E-05 | 0.00083  | 995.859 | 652.03  | 1030.18 | 454.793 | 284.362 | 512.945 | Down |
| Hck       | 3331.72 | 0.51541  | 0.16349 | 3.15254 | 0.00162  | 0.01589  | 2373.61 | 3281.85 | 2573.02 | 3693.41 | 4453.98 | 3614.47 | Up   |
| Tm9sf4    | 5464.32 | 0.21134  | 0.1008  | 2.09659 | 0.03603  | 0.15394  | 5324.96 | 4762.48 | 5107.05 | 5507.48 | 5823.25 | 6260.71 | Up   |
| Bpifa1    | 26111   | -4.2795  | 1.99906 | -2.1407 | 0.03229  | 0.14235  | 106173  | 234.77  | 42586.3 | 1113.53 | 42.2422 | 6516.18 | Down |
| Bpifa5    | 24.1813 | -3.2136  | 1.24784 | -2.5754 | 0.01001  | 0.06195  | 82.2539 | 0       | 48.7314 | 3.05914 | 3.0909  | 7.95263 | Down |
| Bpifb5    | 259.296 | -2.1752  | 0.77368 | -2.8115 | 0.00493  | 0.03698  | 628.655 | 321.576 | 323.576 | 57.104  | 33.9998 | 190.863 | Down |
| Trp53inp2 | 15996.1 | 0.33809  | 0.09277 | 3.64443 | 0.00027  | 0.004    | 13860.8 | 14736.3 | 13793.9 | 16570.4 | 18682.4 | 18332.8 | Up   |
| Acss2     | 1551.87 | -0.3851  | 0.13053 | -2.9502 | 0.00318  | 0.02674  | 1841.9  | 1528.97 | 1902.47 | 1350.1  | 1266.24 | 1421.53 | Down |
| Procr     | 455.929 | -0.4     | 0.13814 | -2.8955 | 0.00379  | 0.03052  | 529.754 | 505.052 | 521.426 | 428.28  | 354.423 | 396.637 | Down |
| Cnbd2     | 522.104 | 0.64647  | 0.2475  | 2.612   | 0.009    | 0.05725  | 416.165 | 394.572 | 410.318 | 487.424 | 894.299 | 529.844 | Up   |
| Epb41l1   | 3417.25 | 0.37668  | 0.14482 | 2.6009  | 0.0093   | 0.05851  | 3201.05 | 2423.66 | 3296.19 | 3808.64 | 3995.5  | 3778.49 | Up   |
| Gm14168   | 76.2814 | 0.64506  | 0.31242 | 2.06474 | 0.03895  | 0.16216  | 68.5449 | 69.0501 | 40.9343 | 101.971 | 91.6966 | 85.4908 | Up   |
| Soga1     | 758.029 | 0.32798  | 0.13604 | 2.41083 | 0.01592  | 0.08718  | 646.28  | 649.071 | 721.224 | 798.437 | 946.844 | 786.316 | Up   |
| Tlhc2     | 16.847  | -1.3457  | 0.6233  | -2.159  | 0.03085  | 0.13755  | 21.5427 | 22.6879 | 28.2642 | 11.2169 | 13.3939 | 3.97631 | Down |
| Rbl1      | 1388.24 | 0.29389  | 0.11981 | 2.45306 | 0.01416  | 0.08     | 1131.97 | 1384.95 | 1225.11 | 1475.53 | 1567.08 | 1544.8  | Up   |
| Platr27   | 10.2798 | 1.9358   | 0.98678 | 1.96173 | 0.04979  | 0.19047  | 4.89606 | 7.89144 | 0       | 19.3746 | 19.5757 | 9.94079 | Up   |
| Tgm2      | 1452.84 | 0.57272  | 0.15375 | 3.72497 | 0.0002   | 0.00313  | 1363.06 | 1160.04 | 981.45  | 1738.61 | 1854.54 | 1619.35 | Up   |
| Mafb      | 1073.65 | 0.52931  | 0.24556 | 2.15552 | 0.03112  | 0.13833  | 642.364 | 1241.91 | 752.412 | 1374.58 | 1163.21 | 1267.45 | Up   |
| L3mbtl1   | 33.3981 | 0.93929  | 0.45427 | 2.0677  | 0.03867  | 0.16139  | 21.5427 | 32.5522 | 14.6194 | 36.7097 | 43.2725 | 51.6921 | Up   |
| Gdap1l1   | 21.1566 | 1.31888  | 0.57151 | 2.30773 | 0.02101  | 0.10588  | 12.7298 | 16.7693 | 6.82239 | 30.5914 | 39.1513 | 20.8756 | Up   |
| Fitm2     | 2445.15 | -0.2652  | 0.09389 | -2.8241 | 0.00474  | 0.03591  | 2820.13 | 2661.39 | 2526.23 | 2235.22 | 2157.44 | 2270.48 | Down |
| Serinc3   | 55871.7 | 0.21825  | 0.11036 | 1.97763 | 0.04797  | 0.18606  | 51579.1 | 47824.1 | 55557.7 | 64216.5 | 61163.7 | 54889   | Up   |
| Ada       | 171.771 | -0.5277  | 0.21232 | -2.4853 | 0.01294  | 0.07468  | 237.949 | 178.544 | 192.002 | 156.016 | 132.908 | 133.207 | Down |
| Ccn5      | 2023.64 | 0.72655  | 0.21679 | 3.35134 | 0.0008   | 0.00926  | 1227.93 | 1862.38 | 1483.38 | 2378.99 | 3168.17 | 2020.96 | Up   |
| Slpi      | 3747.15 | 0.76045  | 0.10336 | 7.35712 | 1.88E-13 | 3.53E-11 | 2569.45 | 3050.04 | 2726.03 | 4700.89 | 4770.28 | 4666.2  | Up   |
| Neurl2    | 361.3   | -0.6697  | 0.19723 | -3.3954 | 0.00069  | 0.00819  | 431.833 | 367.938 | 531.172 | 266.146 | 314.241 | 256.472 | Down |
| Ctsa      | 13699.9 | 0.67162  | 0.13428 | 5.00155 | 5.69E-07 | 2.51E-05 | 10044.8 | 11992   | 9665.38 | 16390.9 | 18736   | 15370.4 | Up   |
| Zfp334    | 845.387 | -0.4511  | 0.15633 | -2.8856 | 0.00391  | 0.03117  | 992.922 | 905.542 | 1031.16 | 721.958 | 599.634 | 821.109 | Down |
| Slc2a10   | 505.985 | -0.7348  | 0.12895 | -5.698  | 1.21E-08 | 8.72E-07 | 642.364 | 632.301 | 621.812 | 394.63  | 346.18  | 398.625 | Down |
| Trp53rkb  | 183.361 | -0.3972  | 0.18184 | -2.1843 | 0.02894  | 0.13187  | 212.489 | 210.11  | 202.722 | 176.411 | 147.333 | 151.1   | Down |
| Arfgef2   | 6745.65 | 0.29662  | 0.09238 | 3.21085 | 0.00132  | 0.01366  | 5788.13 | 6260.87 | 6114.81 | 7268.53 | 7923    | 7118.6  | Up   |
| Znfx1     | 4943.41 | 0.23237  | 0.10961 | 2.12004 | 0.034    | 0.14768  | 4078.42 | 4713.16 | 4846.82 | 5206.66 | 5622.34 | 5193.07 | Up   |
| B4galt5   | 3138.44 | 0.24472  | 0.12174 | 2.01019 | 0.04441  | 0.17633  | 3196.15 | 2573.59 | 2848.84 | 3354.86 | 3621.5  | 3235.73 | Up   |
| Gm20431   | 50.2959 | -0.9059  | 0.43367 | -2.0889 | 0.03672  | 0.15583  | 54.8359 | 56.2265 | 85.7672 | 27.5323 | 24.7272 | 52.6862 | Down |
| A530013C  | 120.728 | 0.72178  | 0.25406 | 2.84102 | 0.0045   | 0.03457  | 94.0044 | 85.8194 | 93.5642 | 187.628 | 139.09  | 124.26  | Up   |
| 1200007C  | 142.879 | -1.2555  | 0.43939 | -2.8574 | 0.00427  | 0.03331  | 185.071 | 328.481 | 90.6403 | 92.7941 | 91.6966 | 68.5914 | Down |
| Kcng1     | 61.1535 | 0.77403  | 0.39373 | 1.96587 | 0.04931  | 0.1892   | 26.4387 | 65.1044 | 43.8582 | 85.6561 | 77.2724 | 68.5914 | Up   |
| Nfatc2    | 356.002 | 0.53815  | 0.16013 | 3.36067 | 0.00078  | 0.00899  | 262.429 | 290.01  | 318.703 | 433.379 | 380.18  | 451.312 | Up   |
| Atp9a     | 6340.34 | 0.21027  | 0.08615 | 2.44067 | 0.01466  | 0.08216  | 5887.03 | 5705.51 | 6044.64 | 6897.35 | 7068.88 | 6438.65 | Up   |
| Sall4     | 2.28855 | -4.6161  | 1.94821 | -2.3694 | 0.01782  | NA       | 5.87528 | 4.93215 | 2.92388 | 0       | 0       | 0       | Down |
| Zfp217    | 1800.16 | 0.37765  | 0.08463 | 4.46255 | 8.10E-06 | 0.00024  | 1554.99 | 1582.23 | 1560.38 | 2032.29 | 2072.96 | 1998.1  | Up   |
| Cbln4     | 13.3687 | -4.6761  | 1.2285  | -3.8064 | 0.00014  | 0.00245  | 27.418  | 8.87787 | 40.9343 | 0       | 0       | 2.98224 | Down |
| Fam210b   | 2425.52 | -0.3432  | 0.12109 | -2.834  | 0.0046   | 0.0352   | 2951.35 | 2824.15 | 2362.5  | 2116.93 | 2115.2  | 2183    | Down |
| Aurka     | 256.932 | -0.3294  | 0.16021 | -2.0563 | 0.03976  | 0.16445  | 299.639 | 278.173 | 280.693 | 216.18  | 217.393 | 249.514 | Down |
| Bmp7      | 145.261 | -0.943   | 0.21023 | -4.4858 | 7.26E-06 | 0.00022  | 217.385 | 182.489 | 173.484 | 104.011 | 94.7875 | 99.4079 | Down |
| Pck1      | 117.512 | -4.6215  | 1.37233 | -3.3676 | 0.00076  | 0.00884  | 608.091 | 20.715  | 48.7314 | 13.2563 | 10.303  | 3.97631 | Down |
| 1700010B  | 2.79016 | -3.8492  | 1.82854 | -2.1051 | 0.03529  | NA       | 1.95843 | 9.8643  | 3.89851 | 1.01971 | 0       | 0       | Down |
| Ctsz      | 13927.2 | 0.77054  | 0.13778 | 5.59271 | 2.24E-08 | 1.48E-06 | 9908.65 | 11577.7 | 9395.41 | 16871.2 | 19924.9 | 15885.4 | Up   |
| Fam217b   | 579.904 | 0.29994  | 0.13915 | 2.15544 | 0.03113  | 0.13833  | 559.13  | 517.876 | 482.441 | 609.79  | 706.785 | 603.406 | Up   |
| Cdh26     | 494.683 | -3.542   | 1.2113  | -2.9241 | 0.00345  | 0.02851  | 2205.19 | 81.8737 | 446.379 | 45.8872 | 53.5755 | 135.195 | Down |
| Lsm14b    | 2750.02 | -0.4384  | 0.19714 | -2.224  | 0.02615  | 0.12272  | 3826.76 | 2357.57 | 3309.83 | 2413.67 | 2026.6  | 2565.72 | Down |

|          |         |         |         |         |          |          |         |         |         |         |         |         |      |
|----------|---------|---------|---------|---------|----------|----------|---------|---------|---------|---------|---------|---------|------|
| Polr3k   | 2521.23 | -0.2816 | 0.09817 | -2.8684 | 0.00413  | 0.03234  | 2692.84 | 2907.01 | 2699.72 | 2424.88 | 2182.17 | 2220.77 | Down |
| Hey1     | 3253.09 | -0.3421 | 0.15329 | -2.2314 | 0.02565  | 0.12103  | 3788.57 | 3155.59 | 3966.73 | 3230.46 | 2438.72 | 2938.5  | Down |
| Mrps28   | 754.592 | -0.3747 | 0.15011 | -2.4958 | 0.01257  | 0.07299  | 865.624 | 835.506 | 854.748 | 660.775 | 755.209 | 555.69  | Down |
| Tpd52    | 8173.3  | 0.31568 | 0.07168 | 4.40436 | 1.06E-05 | 0.00029  | 7434.18 | 7250.26 | 7163.51 | 9009.18 | 9020.26 | 9162.42 | Up   |
| Pag1     | 2804.59 | 0.62975 | 0.12681 | 4.96616 | 6.83E-07 | 2.88E-05 | 2092.58 | 2353.62 | 2159.77 | 3086.68 | 3856.41 | 3278.47 | Up   |
| Fabp5    | 24474.4 | 0.86387 | 0.20452 | 4.22397 | 2.40E-05 | 0.00057  | 15968   | 20592.7 | 15514.1 | 30276.4 | 24350.1 | 40144.9 | Up   |
| Gm38335  | 3.3765  | 4.19391 | 1.66302 | 2.52186 | 0.01167  | NA       | 0.97921 | 0       | 0       | 4.07886 | 8.24239 | 6.95855 | Up   |
| 4632432E | 137.911 | -0.7862 | 0.35925 | -2.1884 | 0.02864  | 0.13089  | 221.302 | 194.327 | 108.184 | 122.366 | 66.9694 | 114.319 | Down |
| 1700029B | 23.792  | -1.09   | 0.50601 | -2.1541 | 0.03123  | 0.13861  | 36.2309 | 40.4436 | 20.4672 | 13.2563 | 15.4545 | 16.8993 | Down |
| Fabp12   | 493.336 | -0.6076 | 0.2127  | -2.8568 | 0.00428  | 0.03334  | 581.652 | 734.89  | 470.745 | 387.492 | 336.908 | 448.329 | Down |
| Raly1    | 267.194 | -1.3758 | 0.44521 | -3.0904 | 0.002    | 0.01881  | 420.082 | 195.313 | 541.893 | 199.864 | 70.0603 | 175.952 | Down |
| Car3     | 1543.65 | -5.3008 | 1.39129 | -3.81   | 0.00014  | 0.00242  | 8080.46 | 331.44  | 620.838 | 52.0055 | 147.333 | 29.8224 | Down |
| Car2     | 5061.67 | -0.4911 | 0.17399 | -2.8226 | 0.00476  | 0.03604  | 5465.97 | 7470.23 | 4808.81 | 4257.31 | 4200.53 | 4167.18 | Down |
| Sirpb1a  | 303.697 | 1.05174 | 0.30701 | 3.42572 | 0.00061  | 0.00756  | 175.279 | 291.983 | 125.727 | 391.571 | 469.816 | 367.809 | Up   |
| Sirpb1b  | 321.688 | 0.7758  | 0.32849 | 2.36168 | 0.01819  | 0.09611  | 197.801 | 344.264 | 169.585 | 371.176 | 547.088 | 300.212 | Up   |
| Sirpb1c  | 672.326 | 1.33336 | 0.24883 | 5.35847 | 8.39E-08 | 4.84E-06 | 346.641 | 507.025 | 292.388 | 911.625 | 1188.96 | 787.31  | Up   |
| Gm5150   | 292.396 | 0.8076  | 0.30583 | 2.64073 | 0.00827  | 0.05384  | 185.071 | 291.983 | 160.814 | 338.545 | 497.634 | 280.33  | Up   |
| Bhlhe22  | 180.616 | 0.85461 | 0.36503 | 2.34119 | 0.01922  | 0.09958  | 125.339 | 192.354 | 68.2239 | 202.923 | 277.15  | 217.703 | Up   |
| Cyp7b1   | 611.89  | 0.48776 | 0.15732 | 3.10051 | 0.00193  | 0.01827  | 474.918 | 472.5   | 580.878 | 633.243 | 729.451 | 780.352 | Up   |
| Trim55   | 52.7004 | -1.9852 | 0.52264 | -3.7984 | 0.00015  | 0.00251  | 123.381 | 36.4979 | 92.5896 | 22.4337 | 15.4545 | 25.846  | Down |
| Cpb1     | 104.192 | -0.9877 | 0.45681 | -2.1621 | 0.03061  | 0.13702  | 120.443 | 227.865 | 67.2493 | 70.3603 | 86.5451 | 52.6862 | Down |
| Nlgn1    | 348.862 | -4.3532 | 1.22136 | -3.5642 | 0.00036  | 0.00505  | 1280.81 | 26.6336 | 688.087 | 41.8083 | 32.9696 | 22.8638 | Down |
| Nceh1    | 8047.22 | 0.40305 | 0.13962 | 2.88666 | 0.00389  | 0.03112  | 6882.89 | 7267.03 | 6641.11 | 9116.25 | 10618.3 | 7757.79 | Up   |
| Tnfsf10  | 6210.75 | 0.5545  | 0.28093 | 1.97379 | 0.04841  | 0.18691  | 3125.65 | 6760    | 5209.38 | 6094.84 | 9597.23 | 6477.42 | Up   |
| Fndc3b   | 5879.72 | 0.35147 | 0.13557 | 2.59252 | 0.00953  | 0.05967  | 5064.49 | 5891.94 | 4544.69 | 6066.28 | 7142.03 | 6568.87 | Up   |
| Tmem212  | 6307.35 | -0.9247 | 0.2573  | -3.5938 | 0.00033  | 0.00466  | 9022.47 | 5916.6  | 9847.63 | 5136.3  | 2920.9  | 5000.22 | Down |
| Pld1     | 2619.49 | 0.38293 | 0.12148 | 3.1522  | 0.00162  | 0.0159   | 2219.88 | 2258.92 | 2343    | 2828.69 | 2702.47 | 3363.96 | Up   |
| Eif5a2   | 1457.9  | 0.60822 | 0.14342 | 4.24077 | 2.23E-05 | 0.00054  | 968.441 | 1201.47 | 1295.28 | 1732.5  | 1691.75 | 1857.93 | Up   |
| Lrrc34   | 1202.16 | -1.0976 | 0.2939  | -3.7345 | 0.00019  | 0.00305  | 1981.93 | 1005.17 | 1928.79 | 823.93  | 535.755 | 937.416 | Down |
| Slc7a14  | 66.8827 | -1.8475 | 0.67415 | -2.7404 | 0.00614  | 0.04344  | 120.443 | 58.1993 | 135.473 | 13.2563 | 10.303  | 63.621  | Down |
| Kcnmb2   | 1661.01 | -1.1571 | 0.33099 | -3.496  | 0.00047  | 0.00617  | 2920.01 | 1460.9  | 2499.92 | 1099.25 | 588.3   | 1397.67 | Down |
| Ndufb5   | 2723    | -0.2372 | 0.0959  | -2.4733 | 0.01339  | 0.07656  | 3072.77 | 2800.47 | 2965.79 | 2626.79 | 2381.02 | 2491.16 | Down |
| Gm9791   | 116.567 | 0.46408 | 0.21528 | 2.15575 | 0.0311   | 0.13833  | 103.797 | 90.7515 | 99.412  | 133.583 | 126.727 | 145.135 | Up   |
| Fxr1     | 1008.13 | 0.31948 | 0.14806 | 2.15772 | 0.03095  | 0.13787  | 997.818 | 836.492 | 856.697 | 1080.9  | 1002.48 | 1274.41 | Up   |
| Sox2ot   | 183.921 | -0.8834 | 0.37752 | -2.34   | 0.01928  | 0.09967  | 326.078 | 142.046 | 247.555 | 125.425 | 84.4845 | 177.94  | Down |
| 1700017N | 4.58273 | -3.6469 | 1.47695 | -2.4692 | 0.01354  | NA       | 9.79213 | 5.91858 | 9.74627 | 2.03943 | 0       | 0       | Down |
| Exosc9   | 836.909 | 0.22335 | 0.10411 | 2.1452  | 0.03194  | 0.14102  | 747.139 | 778.293 | 791.397 | 887.152 | 885.026 | 932.446 | Up   |
| Bbs7     | 1064.31 | -0.5849 | 0.22955 | -2.5479 | 0.01084  | 0.06552  | 1354.25 | 956.837 | 1520.42 | 793.338 | 692.361 | 1068.63 | Down |
| Cetn4    | 1276.55 | -0.8899 | 0.31662 | -2.8107 | 0.00494  | 0.03705  | 2008.37 | 1035.75 | 1930.74 | 866.758 | 580.058 | 1237.63 | Down |
| Gm43439  | 19.471  | -1.1966 | 0.54554 | -2.1934 | 0.02828  | 0.12973  | 25.4595 | 27.62   | 28.2642 | 17.3352 | 7.21209 | 10.9349 | Down |
| Gm20755  | 209.621 | -1.1689 | 0.37232 | -3.1395 | 0.00169  | 0.01651  | 328.036 | 224.906 | 317.728 | 86.6758 | 89.636  | 210.745 | Down |
| Intu     | 1197.82 | -0.4761 | 0.23528 | -2.0236 | 0.04302  | 0.17286  | 1681.31 | 968.674 | 1531.14 | 1029.91 | 809.815 | 1166.05 | Down |
| Slc25a31 | 44.8808 | -1.7499 | 0.39842 | -4.3921 | 1.12E-05 | 0.0003   | 74.4202 | 55.2401 | 77.9702 | 17.3352 | 16.4848 | 27.8342 | Down |
| Hspa4l   | 7990.79 | -0.615  | 0.21775 | -2.8241 | 0.00474  | 0.03591  | 11748.6 | 7359.75 | 9897.34 | 5888.85 | 5145.31 | 7904.91 | Down |
| 1700052H | 18.3398 | -3.0124 | 0.75152 | -4.0085 | 6.11E-05 | 0.00123  | 52.8775 | 18.7422 | 26.3149 | 4.07886 | 2.0606  | 5.96447 | Down |
| D3Ert751 | 961.183 | -0.3927 | 0.13739 | -2.8583 | 0.00426  | 0.03325  | 1170.16 | 1005.17 | 1098.4  | 771.924 | 783.027 | 938.41  | Down |
| Slc7a11  | 471.337 | 0.80833 | 0.18141 | 4.45595 | 8.35E-06 | 0.00024  | 319.223 | 346.237 | 362.561 | 515.976 | 556.361 | 727.665 | Up   |
| Gm6209   | 48.506  | 2.23773 | 0.47434 | 4.71759 | 2.39E-06 | 8.46E-05 | 11.7506 | 11.8372 | 27.2896 | 92.7941 | 91.6966 | 55.6684 | Up   |
| Gm37199  | 3.04158 | 5.07663 | 1.79274 | 2.83177 | 0.00463  | NA       | 0       | 0       | 0       | 4.07886 | 7.21209 | 6.95855 | Up   |
| Gm5103   | 54.8611 | -0.7726 | 0.34529 | -2.2376 | 0.02525  | 0.1195   | 81.2747 | 55.2401 | 71.1478 | 44.8675 | 30.909  | 45.7276 | Down |
| Gm30173  | 8.38466 | -1.6528 | 0.84163 | -1.9638 | 0.04955  | 0.18981  | 16.6466 | 7.89144 | 13.6448 | 2.03943 | 4.12119 | 5.96447 | Down |
| Nhlrc3   | 2045.08 | 0.38625 | 0.13687 | 2.82202 | 0.00477  | 0.03605  | 1670.54 | 1970.89 | 1677.33 | 2187.29 | 2624.17 | 2140.25 | Up   |
| Frem2    | 91.4235 | -1.9205 | 0.301   | -6.3805 | 1.76E-10 | 1.82E-08 | 172.341 | 112.453 | 149.118 | 43.8477 | 33.9998 | 36.7809 | Down |
| Sertm1   | 2.12426 | -4.5087 | 2.13135 | -2.1154 | 0.03439  | NA       | 0.97921 | 5.91858 | 5.84776 | 0       | 0       | 0       | Down |
| Nbea     | 2210.73 | 0.21646 | 0.09621 | 2.24987 | 0.02446  | 0.11691  | 2140.56 | 2046.84 | 1948.28 | 2279.06 | 2361.44 | 2488.18 | Up   |
| Tm4sf1   | 18757.4 | -0.5863 | 0.12034 | -4.8726 | 1.10E-06 | 4.32E-05 | 23947.6 | 19465.2 | 24139.6 | 15008.2 | 15618.3 | 14365.4 | Down |
| Tm4sf4   | 45.238  | -2.2784 | 0.56839 | -4.0084 | 6.11E-05 | 0.00123  | 65.6073 | 53.2672 | 106.234 | 16.3154 | 5.15149 | 24.852  | Down |
| Gm26671  | 694.821 | -0.482  | 0.19169 | -2.5146 | 0.01192  | 0.07019  | 633.551 | 877.922 | 918.099 | 590.415 | 502.786 | 646.151 | Down |
| BB187690 | 283.371 | -0.8195 | 0.31701 | -2.5851 | 0.00973  | 0.06054  | 395.602 | 211.096 | 478.542 | 250.85  | 178.242 | 185.893 | Down |
| Ankub1   | 346.65  | -0.8313 | 0.35149 | -2.3651 | 0.01803  | 0.09563  | 509.191 | 226.879 | 595.497 | 284.5   | 186.484 | 277.348 | Down |
| Pfn2     | 1602.92 | -0.9498 | 0.21312 | -4.4567 | 8.32E-06 | 0.00024  | 2155.25 | 1599    | 2582.76 | 1018.7  | 941.693 | 1320.14 | Down |
| Gm42513  | 11.2639 | -2.8902 | 1.22125 | -2.3666 | 0.01795  | 0.09533  | 19.5843 | 2.95929 | 37.0358 | 2.03943 | 0       | 5.96447 | Down |
| 4921539H | 10.6282 | -3.5382 | 1.24348 | -2.8454 | 0.00444  | 0.0342   | 43.0854 | 3.94572 | 11.6955 | 0       | 2.0606  | 2.98224 | Down |
| Gm8234   | 51.3435 | -1.9755 | 0.55944 | -3.5313 | 0.00041  | 0.00557  | 79.3162 | 57.2129 | 109.158 | 19.3746 | 7.21209 | 35.7868 | Down |
| 4930593A | 59.8265 | -0.8582 | 0.30924 | -2.775  | 0.00552  | 0.04015  | 77.3578 | 85.8194 | 68.2239 | 39.7689 | 37.0907 | 50.698  | Down |
| P2ry1    | 242.941 | -0.5248 | 0.20427 | -2.5693 | 0.01019  | 0.06282  | 265.367 | 254.499 | 340.145 | 194.766 | 177.211 | 225.656 | Down |
| Rap2b    | 535.829 | 0.44713 | 0.12498 | 3.57775 | 0.00035  | 0.00486  | 428.895 | 464.608 | 466.846 | 583.277 | 648.058 | 623.287 | Up   |
| Lekr1    | 461.111 | -0.439  | 0.15507 | -2.8308 | 0.00464  | 0.03543  | 480.793 | 523.794 | 587.7   | 380.354 | 360.604 | 433.418 | Down |
| Gm37359  | 185.493 | -1.3228 | 0.35729 | -3.7024 | 0.00021  | 0.00336  | 290.826 | 207.15  | 297.261 | 98.9123 | 59.7573 | 159.053 | Down |
| Veph1    | 243.01  | 0.42539 | 0.21365 | 1.99103 | 0.04648  | 0.18197  | 207.593 | 197.286 | 217.342 | 319.171 | 303.938 | 212.733 | Up   |
| Mlf1     | 2811.85 | -0.9303 | 0.28506 | -3.2635 | 0.0011   | 0.01186  | 4440.73 | 2329.95 | 4294.21 | 2143.44 | 1317.75 | 2345.03 | Down |
| Mfsd1    | 7921.43 | 0.25628 | 0.11005 | 2.32875 | 0.01987  | 0.10187  | 7819.01 | 6553.84 | 7286.31 | 8714.48 | 8089.9  | 9065    | Up   |
| Smc4     | 3632.36 | 0.30366 | 0.11295 | 2.68848 | 0.00718  | 0.04845  | 2892.59 | 3551.15 | 3310.81 | 3920.8  | 3992.41 | 4126.42 | Up   |
| Ptsssb   | 2265.77 | 0.68269 | 0.29724 | 2.29681 | 0.02163  | 0.10754  | 1509.95 | 1385.93 | 2322.54 | 3575.12 | 1659.81 | 3141.29 | Up   |
| Bche     | 689.195 | -0.5304 | 0.17508 | -3.0296 | 0.00245  | 0.02206  | 663.906 | 877.922 | 901.53  | 527.193 | 637.755 | 526.862 | Down |
| Gm37464  | 607.256 | -0.7883 | 0.24699 | -3.1918 | 0.00141  | 0.0143   | 924.377 | 585.939 | 797.245 | 499.66  | 319.393 | 516.921 | Down |
| Wdr49    | 797.774 | -0.7435 | 0.31521 | -2.3587 | 0.01834  | 0.09644  | 1145.68 | 591.858 | 1259.22 | 757.648 | 406.968 | 625.275 | Down |

|            |         |         |         |         |          |            |         |         |         |         |         |         |      |
|------------|---------|---------|---------|---------|----------|------------|---------|---------|---------|---------|---------|---------|------|
| Plrg1      | 3212.13 | -0.2689 | 0.11206 | -2.3998 | 0.01641  | 0.08926    | 3799.35 | 3169.4  | 3563.24 | 2984.71 | 2752.96 | 3003.11 | Down |
| Sfrp2      | 132.054 | 2.43613 | 0.55031 | 4.42686 | 9.56E-06 | 0.00027    | 37.2101 | 49.3215 | 37.0358 | 424.201 | 169.999 | 74.5559 | Up   |
| Gm7115     | 37.2248 | 0.83168 | 0.36502 | 2.27845 | 0.0227   | 0.11091    | 28.3972 | 24.6607 | 27.2896 | 40.7886 | 51.5149 | 50.698  | Up   |
| Tlr2       | 3367.6  | 1.05661 | 0.14886 | 7.09787 | 1.27E-12 | 2.05E-10   | 2120.97 | 2420.7  | 2018.45 | 4278.72 | 5331.79 | 4034.96 | Up   |
| Fhdcd1     | 1912.68 | -0.5136 | 0.21199 | -2.4229 | 0.0154   | 0.08504    | 2170.91 | 1791.36 | 2786.46 | 1945.62 | 1337.33 | 1444.4  | Down |
| Cd1d1      | 915.106 | 0.87468 | 0.11006 | 7.94712 | 1.91E-15 | 5.64E-13   | 689.366 | 640.193 | 608.167 | 1156.36 | 1182.78 | 1213.77 | Up   |
| Fcrls      | 386.819 | 0.4708  | 0.18398 | 2.55894 | 0.0105   | 0.0642     | 271.242 | 390.626 | 310.906 | 442.556 | 480.119 | 425.466 | Up   |
| Etv3       | 2882.93 | 0.22517 | 0.10698 | 2.10483 | 0.03531  | 0.15156    | 2626.25 | 2806.39 | 2542.8  | 3037.73 | 2908.53 | 3375.89 | Up   |
| Arhgef11   | 2330.42 | 0.37749 | 0.09815 | 3.8462  | 0.00012  | 0.00216    | 2149.37 | 2014.29 | 1918.07 | 2584.98 | 2757.08 | 2558.76 | Up   |
| Lrrc71     | 2789.23 | -0.6674 | 0.25218 | -2.6464 | 0.00814  | 0.05318    | 3861.04 | 2293.45 | 4114.88 | 2517.68 | 1608.3  | 2340.06 | Down |
| Bcan       | 1242.56 | -2.9382 | 0.57498 | -5.1101 | 3.22E-07 | 1.55E-05   | 1768.46 | 3353.86 | 1472.66 | 232.495 | 158.666 | 469.205 | Down |
| 1700113A   | 76.832  | -0.6357 | 0.31149 | -2.0409 | 0.04126  | 0.1682     | 99.8797 | 107.521 | 73.097  | 73.4195 | 48.424  | 58.6506 | Down |
| Glmf       | 5610.71 | 0.29541 | 0.10094 | 2.92644 | 0.00343  | 0.02835    | 5094.84 | 5361.24 | 4658.72 | 6269.21 | 6430.09 | 5850.15 | Up   |
| Bglap3     | 398.773 | 3.05237 | 0.46104 | 6.62058 | 3.58E-11 | 4.42E-09   | 135.131 | 34.525  | 87.7165 | 942.217 | 371.938 | 821.109 | Up   |
| Sema4a     | 4527.65 | 0.74705 | 0.16887 | 4.42379 | 9.70E-06 | 0.00027    | 3247.07 | 4091.71 | 2804    | 5418.76 | 6376.52 | 5227.86 | Up   |
| Fdps       | 175.225 | 0.95388 | 0.23011 | 4.1453  | 3.39E-05 | 0.00076    | 103.797 | 145.992 | 108.184 | 204.963 | 263.756 | 224.662 | Up   |
| Hcn3       | 41.7161 | 0.97903 | 0.41595 | 2.35369 | 0.01859  | 0.09738    | 35.2517 | 22.6879 | 26.3149 | 37.7295 | 58.727  | 69.5855 | Up   |
| Gba        | 3166.61 | 0.376   | 0.11251 | 3.34181 | 0.00083  | 0.00951    | 2808.38 | 2891.23 | 2569.12 | 3643.44 | 3836.83 | 3250.64 | Up   |
| Muc1       | 43172.6 | 0.68126 | 0.12052 | 5.65252 | 1.58E-08 | 1.10E-06   | 32059.4 | 37841.4 | 29592.6 | 52554.1 | 54804.7 | 52183.2 | Up   |
| Trim46     | 1236.03 | 0.60453 | 0.11058 | 5.4668  | 4.58E-08 | 2.79E-06   | 923.398 | 1021.94 | 997.044 | 1387.83 | 1565.02 | 1520.94 | Up   |
| Efn3       | 340.228 | -0.6397 | 0.21063 | -3.0372 | 0.00239  | 0.02165    | 318.244 | 508.011 | 417.14  | 255.948 | 261.696 | 280.33  | Down |
| Adam15     | 217.255 | 0.48974 | 0.21367 | 2.29206 | 0.0219   | 0.10849    | 199.759 | 185.449 | 156.915 | 254.929 | 296.726 | 209.751 | Up   |
| Shc1       | 5351.03 | 0.26065 | 0.07614 | 2.7064  | 0.0068   | 0.04659    | 5060.57 | 4837.45 | 5010.56 | 5664.52 | 5847.97 | 5685.14 | Up   |
| Pbxip1     | 8923.07 | 0.36402 | 0.09204 | 3.95508 | 7.65E-05 | 0.00149    | 7666.26 | 8092.67 | 7650.82 | 9550.65 | 10762.5 | 9815.53 | Up   |
| Pmvk       | 8321.1  | -0.4815 | 0.18711 | -2.5736 | 0.01007  | 0.06223    | 10881   | 10058.6 | 8151.78 | 6024.48 | 6105.55 | 8705.15 | Down |
| Kcnn3      | 1352.81 | 1.58242 | 0.28278 | 5.59603 | 2.19E-08 | 1.46E-06   | 852.894 | 791.117 | 387.902 | 1858.94 | 2436.66 | 1789.34 | Up   |
| Adar       | 675.753 | 0.50432 | 0.14779 | 3.41229 | 0.00064  | 0.00785    | 516.045 | 549.441 | 611.091 | 809.654 | 696.482 | 871.807 | Up   |
| Atp8b2     | 1480.74 | 0.24436 | 0.10007 | 2.4418  | 0.01461  | 0.08204    | 1413    | 1297.15 | 1356.68 | 1691.71 | 1569.14 | 1556.73 | Up   |
| Ubap2l     | 1078.52 | 0.38659 | 0.13381 | 2.88908 | 0.00386  | 0.03099    | 1076.15 | 853.262 | 875.215 | 1223.66 | 1198.24 | 1244.59 | Up   |
| 1700094D   | 2166.25 | -1.0803 | 0.2922  | -3.697  | 0.00022  | 0.00342    | 3529.08 | 1880.13 | 3415.09 | 1480.63 | 922.117 | 1770.45 | Down |
| Tpm3       | 10220.2 | 1.18614 | 0.25476 | 4.65598 | 3.22E-06 | 0.00011    | 6159.25 | 6298.35 | 6263.93 | 15784.2 | 18446.5 | 8369.15 | Up   |
| Nup210l    | 228.556 | -0.437  | 0.19597 | -2.2298 | 0.02576  | 0.12134    | 252.637 | 253.512 | 282.642 | 215.16  | 157.636 | 209.751 | Down |
| Slc39a1    | 4964.07 | 0.4914  | 0.1198  | 4.102   | 4.10E-05 | 0.00089    | 4246.85 | 4488.25 | 3645.11 | 5591.1  | 6206.52 | 5606.6  | Up   |
| Dennd4b    | 1397.91 | 0.50233 | 0.16432 | 3.05703 | 0.00224  | 0.02057    | 1067.34 | 1308.99 | 1094.51 | 1555.07 | 1490.05 | 1421.53 | Up   |
| Gm43595    | 370.375 | -0.5924 | 0.17806 | -3.3272 | 0.00088  | 0.00988    | 436.729 | 486.31  | 413.242 | 293.678 | 249.332 | 342.957 | Down |
| S100a7a    | 67.5173 | -0.6873 | 0.26978 | -2.5477 | 0.01084  | 0.06555    | 83.2331 | 82.8601 | 83.8179 | 46.9069 | 54.6058 | 53.6802 | Down |
| C2cd4d     | 2.62323 | -3.7545 | 1.90823 | -1.9675 | 0.04912  | NA         | 8.81291 | 4.93215 | 0.97463 | 1.01971 | 0       | 0       | Down |
| Oaz3       | 50.1227 | -0.8429 | 0.32375 | -2.6034 | 0.00923  | 0.05831    | 64.628  | 62.1451 | 66.2747 | 31.6112 | 43.2725 | 32.8046 | Down |
| Rfx5       | 316.862 | 0.51166 | 0.18669 | 2.74073 | 0.00613  | 0.04344    | 238.928 | 250.553 | 294.337 | 322.23  | 363.695 | 431.43  | Up   |
| Tnfaiip8l2 | 601.141 | 0.6086  | 0.22059 | 2.75901 | 0.0058   | 0.04175    | 434.77  | 627.369 | 366.46  | 709.722 | 799.512 | 669.015 | Up   |
| Ctsk       | 7186.07 | 1.0696  | 0.15857 | 6.74533 | 1.53E-11 | 2.01E-09   | 4975.38 | 3733.64 | 5204.51 | 9713.8  | 10665.6 | 8823.44 | Up   |
| Ctss       | 20849.5 | 1.44804 | 0.19683 | 7.35693 | 1.88E-13 | 3.53E-11   | 11554.7 | 13988.6 | 8009.49 | 29444.3 | 31716.7 | 30383   | Up   |
| Car14      | 1031.17 | -0.4138 | 0.17641 | -2.3459 | 0.01898  | 0.09871    | 965.504 | 1340.56 | 1228.03 | 869.817 | 1010.72 | 772.399 | Down |
| Sf3b4      | 1840.97 | -0.3037 | 0.10374 | -2.9272 | 0.00342  | 0.02831    | 2102.37 | 1924.52 | 2074.98 | 1752.89 | 1641.27 | 1549.77 | Down |
| Bola1      | 782.95  | -0.5639 | 0.14976 | -3.7656 | 0.00017  | 0.00277    | 958.649 | 857.207 | 986.323 | 722.978 | 552.24  | 620.305 | Down |
| H2bc21     | 469.559 | -0.6441 | 0.13826 | -4.659  | 3.18E-06 | 0.00011    | 517.024 | 596.79  | 604.269 | 374.235 | 349.271 | 375.762 | Down |
| Acp6       | 1315.79 | -0.2372 | 0.1047  | -2.2653 | 0.02349  | 0.11362    | 1410.07 | 1343.52 | 1517.49 | 1162.47 | 1239.45 | 1221.72 | Down |
| Hmgcs2     | 1104.23 | -1.4207 | 0.17932 | -7.9225 | 2.33E-15 | 6.78E-13   | 1569.68 | 1764.72 | 1489.23 | 744.392 | 499.695 | 557.678 | Down |
| Phgdh      | 899.771 | 1.00509 | 0.15191 | 6.61651 | 3.68E-11 | 4.51E-09   | 648.239 | 646.111 | 500.958 | 1176.75 | 1301.27 | 1125.3  | Up   |
| Spag17     | 1134.7  | -0.6285 | 0.2896  | -2.1704 | 0.02998  | 0.13499    | 1514.84 | 943.027 | 1676.36 | 976.887 | 571.816 | 1125.3  | Down |
| Gm43464    | 19.6241 | -1.2725 | 0.50556 | -2.517  | 0.01183  | 0.06986    | 30.3556 | 24.6607 | 28.2642 | 9.17743 | 12.3636 | 12.923  | Down |
| Trim45     | 312.157 | -0.5451 | 0.1408  | -3.8714 | 0.00011  | 0.00198    | 381.893 | 362.02  | 367.434 | 256.968 | 244.181 | 260.449 | Down |
| Ptgrfn     | 13580   | 0.37931 | 0.11698 | 3.24264 | 0.00118  | 0.01259    | 11772.1 | 12391.5 | 11251.1 | 14673.7 | 17314.2 | 14077.1 | Up   |
| Cd2        | 1261.31 | 0.60971 | 0.21754 | 2.80272 | 0.00507  | 0.03776    | 909.689 | 1273.48 | 812.839 | 1448    | 1850.42 | 1273.41 | Up   |
| Casq2      | 154.145 | -2.4075 | 1.09007 | -2.2086 | 0.0272   | 0.12588    | 413.228 | 40.4436 | 324.551 | 42.828  | 12.3636 | 91.4552 | Down |
| Vangl1     | 1874.48 | -0.2389 | 0.11795 | -2.0252 | 0.04285  | 0.17231    | 2087.68 | 1824.89 | 2175.37 | 1774.3  | 1605.2  | 1779.4  | Down |
| Gm16160    | 66.1731 | -1.609  | 0.37914 | -4.2439 | 2.20E-05 | 0.00053    | 96.9421 | 117.385 | 84.7926 | 30.5914 | 20.606  | 46.7217 | Down |
| A230001N   | 50.9573 | -1.7853 | 0.46985 | -3.7996 | 0.00014  | 0.0025     | 60.7112 | 74.9687 | 101.361 | 29.5717 | 10.303  | 28.8283 | Down |
| Ngf        | 10.509  | -1.9236 | 0.9667  | -1.9899 | 0.04661  | 0.18237    | 33.2932 | 3.94572 | 12.6702 | 3.05914 | 4.12119 | 5.96447 | Down |
| Nr1h5      | 64.2331 | -0.8318 | 0.40221 | -2.068  | 0.03864  | 0.16131    | 62.6696 | 74.9687 | 109.158 | 57.104  | 27.8181 | 53.6802 | Down |
| Ampd1      | 28.9425 | -1.7641 | 0.47468 | -3.7165 | 0.0002   | 0.00321    | 52.8775 | 34.525  | 46.7821 | 9.17743 | 13.3939 | 16.8993 | Down |
| Bcl2l15    | 138.648 | 3.71415 | 0.55992 | 6.63339 | 3.28E-11 | 4.11E-09   | 16.6466 | 29.5929 | 12.6702 | 180.49  | 481.149 | 111.337 | Up   |
| Ptpn22     | 787.136 | 0.51891 | 0.26386 | 1.96661 | 0.04923  | 0.18906    | 484.71  | 599.749 | 856.697 | 862.679 | 1199.27 | 719.713 | Up   |
| Magi3      | 710.299 | 0.46156 | 0.16235 | 2.8429  | 0.00447  | 0.03442    | 569.902 | 649.071 | 574.055 | 696.465 | 815.996 | 956.304 | Up   |
| Gm5546     | 34.2544 | -0.8873 | 0.43015 | -2.0628 | 0.03913  | 0.16261    | 36.2309 | 56.2265 | 40.9343 | 31.6112 | 21.6363 | 18.8875 | Down |
| Slc16a1    | 3650.3  | 0.49663 | 0.11058 | 4.49133 | 7.08E-06 | 0.00021    | 2866.16 | 3264.1  | 2954.1  | 4493.88 | 4414.83 | 3908.72 | Up   |
| Ppm1j      | 515.032 | 0.93307 | 0.23951 | 3.89576 | 9.79E-05 | 0.00183    | 377.976 | 403.45  | 280.693 | 714.82  | 822.178 | 491.075 | Up   |
| Capza1     | 4476.4  | 0.40063 | 0.09477 | 4.22748 | 2.36E-05 | 0.00057    | 3832.64 | 4111.44 | 3632.44 | 4933.38 | 5292.64 | 5055.88 | Up   |
| Gm5547     | 107.37  | 1.61403 | 0.2933  | 5.503   | 3.73E-08 | 2.32E-06   | 57.7736 | 37.4843 | 63.3508 | 185.588 | 135.999 | 164.023 | Up   |
| Tmigd3     | 47.7287 | 1.30821 | 0.38052 | 3.43799 | 0.00059  | 0.0073     | 17.6258 | 36.4979 | 28.2642 | 72.3998 | 66.9694 | 64.6151 | Up   |
| I830077J0  | 416.162 | 0.95294 | 0.23077 | 4.12936 | 3.64E-05 | 0.0008     | 252.637 | 364.979 | 232.936 | 455.813 | 641.876 | 548.731 | Up   |
| Atp5pb     | 14131.3 | 0.26637 | 0.07479 | 3.56163 | 0.00037  | 0.00508    | 13231.1 | 12764.4 | 12495.7 | 15647.5 | 15570.9 | 15078.2 | Up   |
| Pifo       | 1878.07 | -1.0463 | 0.31483 | -3.3234 | 0.00089  | 0.00998    | 3060.04 | 1569.41 | 2962.87 | 1311.35 | 758.3   | 1606.43 | Down |
| Chil5      | 44.7065 | -1.2061 | 0.35363 | -3.4108 | 0.00065  | 0.00788    | 52.8775 | 62.1451 | 72.1224 | 23.4534 | 27.8181 | 29.8224 | Down |
| Chil3      | 62780.1 | 3.03493 | 0.32484 | 9.34289 | 9.37E-21 | 6.12E-18   | 16194.2 | 14476.8 | 10290.1 | 105408  | 170017  | 60294.8 | Up   |
| Chil4      | 35.0061 | 2.5067  | 0.62138 | 4.03409 | 5.48E-05 | 0.00113    | 9.79213 | 16.7693 | 4.87314 | 59.1435 | 89.636  | 29.8224 | Up   |
| Gm6522     | 61.1376 | 2.79812 | 0.54637 | 5.12132 | 3.03E-07 | 1.48E-05</ |         |         |         |         |         |         |      |

|           |         |         |         |         |          |          |         |         |         |         |         |         |      |
|-----------|---------|---------|---------|---------|----------|----------|---------|---------|---------|---------|---------|---------|------|
| Kcna2     | 339.561 | -0.6464 | 0.20901 | -3.0928 | 0.00198  | 0.01869  | 450.438 | 431.07  | 361.587 | 329.368 | 245.211 | 219.691 | Down |
| Csf1      | 2272.26 | 0.73621 | 0.16767 | 4.39086 | 1.13E-05 | 0.00031  | 1405.17 | 2090.24 | 1618.86 | 2709.38 | 3039.38 | 2770.5  | Up   |
| Gstm7     | 313.53  | -0.596  | 0.25325 | -2.3535 | 0.0186   | 0.09738  | 476.877 | 279.16  | 376.206 | 234.534 | 211.211 | 303.194 | Down |
| Gstm6     | 277.518 | -0.8033 | 0.23486 | -3.4204 | 0.00063  | 0.00767  | 379.935 | 272.255 | 406.42  | 213.12  | 161.757 | 231.62  | Down |
| Gstm2     | 9098.01 | -0.6213 | 0.13266 | -4.6838 | 2.82E-06 | 9.60E-05 | 11104.3 | 10456.2 | 11522   | 7441.88 | 6064.34 | 7999.35 | Down |
| Gstm1     | 19622.5 | -0.4999 | 0.1506  | -3.3196 | 0.0009   | 0.0101   | 22619.8 | 18982.9 | 27363.6 | 16953.8 | 15757.4 | 16057.4 | Down |
| Ampd2     | 1461.64 | 0.49422 | 0.12945 | 3.81774 | 0.00013  | 0.00237  | 1280.81 | 1191.61 | 1168.58 | 1606.05 | 1944.17 | 1578.6  | Up   |
| Atxn7l2   | 378.354 | -0.3202 | 0.1578  | -2.0295 | 0.04241  | 0.17118  | 398.54  | 440.934 | 421.039 | 292.658 | 373.998 | 342.957 | Down |
| Sort1     | 26614.8 | 0.45952 | 0.11261 | 4.08047 | 4.49E-05 | 0.00096  | 21472.2 | 24944.8 | 20818   | 29337.2 | 32810.9 | 30305.5 | Up   |
| 1700013F  | 757.491 | -1.0064 | 0.29548 | -3.406  | 0.00066  | 0.00798  | 1246.54 | 613.559 | 1174.43 | 530.252 | 367.817 | 612.352 | Down |
| Henmt1    | 25.5087 | 1.2575  | 0.51106 | 2.46057 | 0.01387  | 0.07874  | 12.7298 | 19.7286 | 12.6702 | 43.8477 | 41.2119 | 22.8638 | Up   |
| Fam102b   | 2373.56 | 0.61733 | 0.16433 | 3.7566  | 0.00017  | 0.00285  | 1926.11 | 1868.3  | 1825.48 | 2973.49 | 3382.47 | 2265.5  | Up   |
| Slc25a24  | 2735.98 | 0.21466 | 0.09387 | 2.28666 | 0.02222  | 0.10951  | 2482.3  | 2539.07 | 2576.91 | 2895.99 | 3135.2  | 2786.4  | Up   |
| Amy1      | 563.332 | -1.189  | 0.19481 | -6.1034 | 1.04E-09 | 9.18E-08 | 875.416 | 605.668 | 868.393 | 303.875 | 366.786 | 359.856 | Down |
| A930005F  | 284.724 | -0.3804 | 0.15747 | -2.4159 | 0.01569  | 0.08629  | 316.286 | 311.712 | 338.196 | 223.318 | 252.423 | 266.413 | Down |
| Slc30a7   | 4343.24 | 0.29287 | 0.08351 | 3.50693 | 0.00045  | 0.00597  | 3803.26 | 4098.62 | 3809.82 | 4730.46 | 4879.49 | 4737.78 | Up   |
| Dbt       | 1609.88 | -0.2858 | 0.13087 | -2.1841 | 0.02896  | 0.13189  | 1800.77 | 1810.1  | 1695.85 | 1333.79 | 1349.69 | 1669.06 | Down |
| Frrs1     | 516.119 | 0.83432 | 0.23859 | 3.49694 | 0.00047  | 0.00615  | 411.269 | 376.816 | 324.551 | 662.815 | 852.057 | 469.205 | Up   |
| Snx7      | 4874.23 | 0.46191 | 0.1941  | 2.37977 | 0.01732  | 0.093    | 4266.43 | 4996.27 | 3038.89 | 5680.83 | 6223    | 5039.98 | Up   |
| Dpyd      | 393.413 | -0.7541 | 0.31156 | -2.4205 | 0.0155   | 0.08554  | 397.56  | 375.83  | 708.554 | 288.579 | 211.211 | 378.744 | Down |
| Rwdd3     | 610.528 | -0.5087 | 0.22248 | -2.2864 | 0.02223  | 0.10957  | 711.888 | 554.373 | 884.962 | 540.449 | 403.877 | 567.619 | Down |
| Tlcd4     | 5944.13 | 0.41428 | 0.14432 | 2.87049 | 0.0041   | 0.03219  | 5219.2  | 5670.98 | 4399.47 | 6091.78 | 6657.79 | 7625.58 | Up   |
| A730020M  | 35.1661 | -0.95   | 0.4776  | -1.9891 | 0.04669  | 0.18257  | 40.1477 | 37.4843 | 61.4015 | 13.2563 | 29.8787 | 28.8283 | Down |
| Synpo2    | 763.286 | -0.4161 | 0.12846 | -3.2395 | 0.0012   | 0.01271  | 947.878 | 843.397 | 826.484 | 615.908 | 708.845 | 637.204 | Down |
| Ugt8a     | 293.223 | -2.1116 | 0.40299 | -5.2398 | 1.61E-07 | 8.42E-06 | 537.588 | 278.173 | 613.041 | 142.76  | 53.5755 | 134.201 | Down |
| Arsj      | 46.8425 | -0.6886 | 0.32808 | -2.0989 | 0.03583  | 0.1532   | 54.8359 | 54.2536 | 64.3254 | 39.7689 | 36.0604 | 31.8105 | Down |
| Camk2d    | 4624.56 | 0.2744  | 0.13992 | 1.96109 | 0.04987  | 0.19052  | 3823.83 | 4620.44 | 4113.9  | 4763.09 | 5831.49 | 4594.63 | Up   |
| Gm35585   | 14.3441 | 4.38249 | 1.46216 | 2.99727 | 0.00272  | 0.02387  | 0       | 3.94572 | 0       | 22.4337 | 57.6967 | 1.98816 | Up   |
| Fam241a   | 1606.36 | 0.41025 | 0.15529 | 2.64181 | 0.00825  | 0.05372  | 1357.19 | 1264.6  | 1516.52 | 2015.98 | 1968.9  | 1514.98 | Up   |
| Enpep     | 11038.5 | 0.4721  | 0.19124 | 2.46869 | 0.01356  | 0.07739  | 9962.51 | 10962.2 | 6820.44 | 11868.5 | 14454.1 | 12163.5 | Up   |
| Cfi       | 465.605 | 1.35766 | 0.19488 | 6.96668 | 3.25E-12 | 4.62E-10 | 208.572 | 292.97  | 282.642 | 578.178 | 672.785 | 758.482 | Up   |
| Lef1      | 322.735 | -0.5652 | 0.2182  | -2.5903 | 0.00959  | 0.05988  | 371.122 | 467.568 | 316.754 | 226.377 | 308.059 | 246.531 | Down |
| Hadh      | 4897.42 | -0.3881 | 0.09686 | -4.0068 | 6.15E-05 | 0.00124  | 5543.32 | 5357.3  | 5756.15 | 4514.28 | 3941.92 | 4271.56 | Down |
| Cyp2u1    | 130.315 | -0.5628 | 0.23173 | -2.4289 | 0.01515  | 0.08398  | 149.82  | 132.182 | 184.205 | 111.149 | 106.121 | 98.4138 | Down |
| 4930534D  | 2.2914  | -4.6177 | 2.02167 | -2.2841 | 0.02236  | NA       | 1.95843 | 7.89144 | 3.89851 | 0       | 0       | 0       | Down |
| Sgms2     | 1139.44 | -0.7157 | 0.25452 | -2.8121 | 0.00492  | 0.03694  | 1789.02 | 923.298 | 1536.99 | 788.24  | 757.269 | 1041.79 | Down |
| Gm29865   | 29.4142 | -1.4227 | 0.55324 | -2.5716 | 0.01012  | 0.0625   | 43.0854 | 50.3079 | 35.0866 | 19.3746 | 22.6666 | 5.96447 | Down |
| Gm43254   | 186.764 | -0.4921 | 0.1846  | -2.6658 | 0.00768  | 0.05085  | 208.572 | 244.635 | 201.748 | 149.898 | 158.666 | 157.064 | Down |
| Gm26691   | 15.154  | -1.7033 | 0.63411 | -2.6861 | 0.00723  | 0.04867  | 28.3972 | 16.7693 | 24.3657 | 6.11829 | 10.303  | 4.97039 | Down |
| Cxxc4     | 129.071 | -1.5874 | 0.39466 | -4.0222 | 5.77E-05 | 0.00117  | 185.071 | 108.507 | 287.515 | 71.38   | 47.3937 | 74.5559 | Down |
| Manba     | 2239.88 | 0.38998 | 0.12243 | 3.18527 | 0.00145  | 0.01456  | 1908.49 | 1875.2  | 2033.07 | 2513.6  | 2838.47 | 2270.48 | Up   |
| Slc39a8   | 22755.6 | 0.43471 | 0.16183 | 2.68623 | 0.00723  | 0.04867  | 16327.4 | 23864.7 | 17866.9 | 24384.4 | 26954.7 | 27135.4 | Up   |
| Ddit4l    | 523.169 | -0.9439 | 0.20118 | -4.6918 | 2.71E-06 | 9.28E-05 | 709.929 | 556.346 | 799.194 | 376.275 | 294.665 | 402.602 | Down |
| H2az1     | 8734.6  | 0.32167 | 0.12789 | 2.51524 | 0.0119   | 0.07008  | 7331.37 | 7810.55 | 8152.76 | 10817.1 | 8363.96 | 9931.84 | Up   |
| Dnajb14   | 2584.64 | 0.20588 | 0.10017 | 2.05524 | 0.03986  | 0.16471  | 2442.16 | 2402.94 | 2356.65 | 2567.64 | 2761.2  | 2977.27 | Up   |
| Lamtor3   | 3475.69 | 0.24887 | 0.12206 | 2.03898 | 0.04145  | 0.16869  | 3346.95 | 3242.39 | 2940.45 | 3663.84 | 4217.01 | 3443.49 | Up   |
| Dapp1     | 1215.2  | 0.75456 | 0.16272 | 4.63711 | 3.53E-06 | 0.00012  | 868.562 | 872.004 | 972.678 | 1576.48 | 1762.84 | 1238.62 | Up   |
| Mttp      | 307.759 | -0.9489 | 0.25864 | -3.6687 | 0.00024  | 0.00374  | 380.914 | 355.115 | 480.491 | 226.377 | 143.211 | 260.449 | Down |
| Tspan5    | 1916.78 | 0.45737 | 0.19872 | 2.30163 | 0.02136  | 0.10682  | 1758.67 | 1710.47 | 1377.15 | 2261.73 | 2709.68 | 1682.97 | Up   |
| Bmpr1b    | 1200.46 | -1.1276 | 0.27108 | -4.1596 | 3.19E-05 | 0.00072  | 1613.74 | 1157.08 | 2170.49 | 911.625 | 533.695 | 816.138 | Down |
| Kyat3     | 542.638 | -0.4967 | 0.22444 | -2.213  | 0.0269   | 0.12516  | 634.53  | 578.048 | 692.96  | 480.286 | 316.302 | 553.702 | Down |
| Gm43646   | 39.0328 | -0.8577 | 0.38399 | -2.2337 | 0.0255   | 0.12048  | 51.8983 | 46.3622 | 52.6299 | 36.7097 | 24.7272 | 21.8697 | Down |
| Lmo4      | 4454.67 | 0.32479 | 0.1229  | 2.64278 | 0.00822  | 0.05362  | 4222.37 | 3704.04 | 3939.44 | 4971.11 | 5485.31 | 4405.76 | Up   |
| Clca3a1   | 319.837 | 0.54428 | 0.25915 | 2.10022 | 0.03571  | 0.15281  | 276.138 | 216.028 | 288.49  | 473.148 | 259.635 | 405.584 | Up   |
| Bcl10     | 3134.81 | 0.21248 | 0.08849 | 2.40124 | 0.01634  | 0.08901  | 2782.92 | 2981.98 | 2948.25 | 3507.82 | 3255.74 | 3332.15 | Up   |
| Wdr63     | 2980.02 | -0.7548 | 0.28438 | -2.6542 | 0.00795  | 0.05219  | 4749.18 | 2469.03 | 4008.64 | 2446.3  | 1471.27 | 2735.7  | Down |
| Mcoln3    | 1185.32 | 2.01241 | 0.27434 | 7.33557 | 2.21E-13 | 4.10E-11 | 442.604 | 592.844 | 377.181 | 1525.49 | 2705.56 | 1468.25 | Up   |
| Mcoln2    | 277.988 | 0.77781 | 0.16276 | 4.77881 | 1.76E-06 | 6.45E-05 | 183.113 | 211.096 | 220.266 | 359.959 | 328.665 | 364.827 | Up   |
| Adgrl4    | 10511   | 0.36697 | 0.15858 | 2.31412 | 0.02066  | 0.10452  | 8036.4  | 9643.34 | 9864.2  | 11152.6 | 14125.4 | 10244   | Up   |
| Gipc2     | 4400.76 | -0.544  | 0.17892 | -3.0406 | 0.00236  | 0.02145  | 5490.45 | 4061.13 | 6110.91 | 3636.3  | 3141.38 | 3964.39 | Down |
| Dnajb4    | 5249.04 | -0.2248 | 0.10982 | -2.0466 | 0.04069  | 0.16654  | 6008.45 | 5732.14 | 5230.82 | 5055.75 | 4425.13 | 5041.97 | Down |
| Usp33     | 2381.03 | 0.4433  | 0.1545  | 2.86921 | 0.00412  | 0.03229  | 2094.54 | 2193.82 | 1766.02 | 2450.37 | 2569.56 | 3211.87 | Up   |
| Acadm     | 4578.66 | -0.3379 | 0.10455 | -3.2315 | 0.00123  | 0.01299  | 5464.01 | 5144.23 | 4728.89 | 4228.76 | 3793.56 | 4112.5  | Down |
| Slc44a5   | 32.5753 | -1.5913 | 0.56643 | -2.8094 | 0.00496  | 0.03716  | 63.6488 | 20.715  | 62.3761 | 12.2366 | 19.5757 | 16.8993 | Down |
| Cryz      | 762.996 | -0.4395 | 0.19389 | -2.2666 | 0.02342  | 0.1135   | 875.416 | 857.207 | 902.505 | 602.652 | 514.119 | 826.079 | Down |
| Erich3    | 2484.28 | -0.7829 | 0.31623 | -2.4757 | 0.0133   | 0.07616  | 3817.95 | 1871.26 | 3737.7  | 1831.41 | 1189.99 | 2457.36 | Down |
| Negr1     | 147.474 | 0.63917 | 0.31083 | 2.05633 | 0.03975  | 0.16445  | 129.256 | 105.548 | 111.108 | 175.391 | 246.241 | 117.301 | Up   |
| Ptger3    | 580.572 | 1.19888 | 0.29541 | 4.05836 | 4.94E-05 | 0.00104  | 331.953 | 489.269 | 235.86  | 651.598 | 716.057 | 1058.69 | Up   |
| Lyn       | 7902.26 | 0.50955 | 0.08275 | 6.15743 | 7.39E-10 | 6.76E-08 | 6502.95 | 6544.96 | 6515.38 | 8753.23 | 9523.05 | 9573.97 | Up   |
| Penk      | 112.49  | -1.5461 | 0.49533 | -3.1214 | 0.0018   | 0.01727  | 197.801 | 69.0501 | 235.86  | 70.3603 | 70.0603 | 31.8105 | Down |
| Fam110b   | 186.776 | -0.6357 | 0.24396 | -2.6059 | 0.00916  | 0.05801  | 221.302 | 283.105 | 177.382 | 152.957 | 158.666 | 127.242 | Down |
| 4930430E  | 418.548 | 2.13208 | 0.22805 | 9.34928 | 8.82E-21 | 5.96E-18 | 181.154 | 138.1   | 147.169 | 697.485 | 831.451 | 515.927 | Up   |
| Sdcbp     | 33706.3 | 0.49286 | 0.0997  | 4.94337 | 7.68E-07 | 3.19E-05 | 27265.2 | 29529.8 | 27217.4 | 38374.9 | 42789.3 | 37061.2 | Up   |
| Tox       | 95.4178 | 1.05253 | 0.24008 | 4.38399 | 1.17E-05 | 0.00031  | 59.732  | 67.0772 | 59.4523 | 118.287 | 128.787 | 139.171 | Up   |
| Car8      | 19695.1 | 0.33326 | 0.15983 | 2.08511 | 0.03706  | 0.15681  | 16622.1 | 21242.8 | 14426.4 | 20534   | 22895.3 | 22450.3 | Up   |
| Gdf6      | 86.7241 | 0.97185 | 0.48514 | 2.00326 | 0.04515  | 0.17836  | 52.8775 | 82.8601 | 39.9597 | 168.253 | 125.696 | 50.698  | Up   |
| Trp53inp1 | 7036.01 | -0.3859 | 0.1904  | -2.0268 | 0.04269  | 0.17194  | 8106.9  | 6106    | 9701.44 | 6045.89 |         |         |      |

|           |         |         |         |         |          |          |         |         |         |         |         |         |      |
|-----------|---------|---------|---------|---------|----------|----------|---------|---------|---------|---------|---------|---------|------|
| Slc7a13   | 8.88562 | 1.52912 | 0.73566 | 2.07856 | 0.03766  | 0.15832  | 4.89606 | 3.94572 | 4.87314 | 14.276  | 13.3939 | 11.9289 | Up   |
| Atp6v0d2  | 7010.85 | 1.80797 | 0.19163 | 9.43481 | 3.92E-21 | 2.96E-18 | 3486    | 3354.85 | 2503.82 | 10044.2 | 13440.2 | 9235.98 | Up   |
| Ggh       | 1978.96 | 0.30002 | 0.11216 | 2.67482 | 0.00748  | 0.04986  | 1893.8  | 1804.18 | 1623.73 | 2213.8  | 2292.41 | 2045.81 | Up   |
| Ccq3      | 838.284 | -0.3001 | 0.10732 | -2.796  | 0.00517  | 0.03834  | 965.504 | 899.624 | 910.302 | 720.938 | 776.845 | 756.494 | Down |
| Faxc      | 40.8077 | -0.9043 | 0.42795 | -2.1132 | 0.03458  | 0.14932  | 50.9191 | 38.4708 | 70.1732 | 20.3943 | 36.0604 | 28.8283 | Down |
| Klhl32    | 406.422 | -0.6052 | 0.28479 | -2.125  | 0.03359  | 0.14635  | 580.673 | 316.644 | 574.055 | 323.25  | 247.272 | 396.637 | Down |
| Map3k7    | 3588.84 | 0.25355 | 0.08416 | 3.01257 | 0.00259  | 0.02302  | 3335.2  | 3314.4  | 3173.39 | 3830.05 | 3815.2  | 4064.79 | Up   |
| Casp8ap2  | 925.983 | 0.29066 | 0.11599 | 2.50596 | 0.01221  | 0.07151  | 852.894 | 827.614 | 818.687 | 1019.71 | 936.541 | 1100.44 | Up   |
| Ankrd6    | 362.726 | -0.9793 | 0.29121 | -3.3629 | 0.00077  | 0.00895  | 511.149 | 340.318 | 592.573 | 272.264 | 163.817 | 296.235 | Down |
| Spaca1    | 23.6272 | -1.0247 | 0.49619 | -2.0652 | 0.03891  | 0.16209  | 39.1685 | 25.6472 | 30.2134 | 11.2169 | 20.606  | 14.9112 | Down |
| Cfap206   | 4249.86 | -0.8774 | 0.28892 | -3.0368 | 0.00239  | 0.02166  | 6432.45 | 3855.95 | 6223    | 3106.05 | 1858.66 | 4023.04 | Down |
| Smim8     | 575.336 | -0.3053 | 0.13383 | -2.2809 | 0.02255  | 0.11051  | 615.925 | 621.451 | 670.544 | 569.001 | 478.058 | 497.039 | Down |
| C9orf72   | 1301.63 | 0.34714 | 0.13531 | 2.56564 | 0.0103   | 0.06325  | 1118.26 | 1254.74 | 1064.29 | 1364.38 | 1641.27 | 1366.86 | Up   |
| Aco1      | 5071.61 | 0.387   | 0.09837 | 3.93416 | 8.35E-05 | 0.0016   | 4070.59 | 4568.16 | 4547.61 | 5443.24 | 5948.94 | 5851.15 | Up   |
| Ddx58     | 4511.42 | 0.29704 | 0.1293  | 2.29729 | 0.0216   | 0.10747  | 3529.08 | 4655.95 | 3960.89 | 4897.69 | 4966.04 | 5058.87 | Up   |
| Topors    | 2777.94 | 0.26401 | 0.11551 | 2.28554 | 0.02228  | 0.10969  | 2495.03 | 2728.46 | 2349.83 | 3079.54 | 3240.29 | 2774.47 | Up   |
| B4galt1   | 7175.5  | 0.22124 | 0.09757 | 2.26741 | 0.02337  | 0.11335  | 7123.77 | 6220.43 | 6534.88 | 7528.56 | 8103.3  | 7542.07 | Up   |
| 1110017D  | 2304.93 | -1.1647 | 0.32376 | -3.5973 | 0.00032  | 0.00461  | 4306.58 | 1702.58 | 3554.47 | 1629.5  | 994.238 | 1642.22 | Down |
| Dnaic1    | 2270.76 | -1.0319 | 0.35355 | -2.9187 | 0.00351  | 0.02889  | 4355.54 | 1475.7  | 3318.61 | 1569.34 | 1037.51 | 1867.87 | Down |
| Enho      | 369.526 | -0.4257 | 0.18361 | -2.3184 | 0.02043  | 0.10378  | 506.253 | 375.83  | 388.876 | 342.624 | 287.453 | 316.117 | Down |
| Cntfr     | 328.579 | -1.8811 | 0.39938 | -4.7101 | 2.48E-06 | 8.64E-05 | 588.507 | 508.998 | 453.202 | 119.307 | 63.8785 | 237.585 | Down |
| Il11ra2   | 12.7433 | -3.5462 | 1.2622  | -2.8095 | 0.00496  | 0.03716  | 50.9191 | 3.94572 | 15.594  | 0       | 1.0303  | 4.97039 | Down |
| Vcp       | 5243.15 | 0.3112  | 0.09646 | 3.22623 | 0.00125  | 0.01314  | 5040.99 | 4550.4  | 4448.2  | 5608.43 | 5775.85 | 6035.05 | Up   |
| Atp8b5    | 1272.37 | -1.7291 | 0.81022 | -2.1341 | 0.03283  | 0.14412  | 2709.48 | 718.121 | 2437.54 | 417.063 | 227.696 | 1124.3  | Down |
| Fam166b   | 1487.34 | -0.6861 | 0.25656 | -2.6743 | 0.00749  | 0.04992  | 2284.5  | 1377.06 | 1842.05 | 1279.74 | 776.845 | 1363.88 | Down |
| Cd72      | 544.066 | 0.86857 | 0.33551 | 2.58883 | 0.00963  | 0.06009  | 256.554 | 498.147 | 400.572 | 577.159 | 483.21  | 1048.75 | Up   |
| Gm12454   | 155.11  | 0.60958 | 0.24987 | 2.43959 | 0.0147   | 0.0823   | 139.048 | 106.534 | 122.803 | 218.219 | 200.908 | 143.147 | Up   |
| Car9      | 266.786 | 1.58155 | 0.3037  | 5.20762 | 1.91E-07 | 9.83E-06 | 158.632 | 125.277 | 116.955 | 572.06  | 354.423 | 273.372 | Up   |
| Npr2      | 5201.22 | -0.2936 | 0.12798 | -2.294  | 0.02179  | 0.10812  | 5687.27 | 6433.49 | 5065.14 | 5043.51 | 4564.22 | 4413.71 | Down |
| Spag8     | 951.566 | -0.8001 | 0.2573  | -3.1097 | 0.00187  | 0.01778  | 1416.92 | 836.492 | 1373.25 | 803.535 | 503.816 | 775.381 | Down |
| Hint2     | 1172.03 | -0.3226 | 0.12488 | -2.5833 | 0.00979  | 0.06074  | 1384.61 | 1271.51 | 1251.42 | 1162.47 | 985.996 | 776.185 | Down |
| Melk      | 342.277 | -0.9531 | 0.45936 | -2.0748 | 0.038    | 0.15939  | 728.534 | 246.607 | 379.13  | 212.101 | 118.484 | 368.803 | Down |
| Grhpr     | 938.401 | -0.5241 | 0.142   | -3.6908 | 0.00022  | 0.00349  | 1073.22 | 1011.09 | 1236.8  | 767.845 | 696.482 | 844.967 | Down |
| Frmppd1   | 383.332 | -0.3923 | 0.14264 | -2.7505 | 0.00595  | 0.04249  | 463.168 | 428.11  | 414.217 | 341.604 | 304.968 | 347.927 | Down |
| Exosc3    | 1155.88 | -0.2742 | 0.13385 | -2.0487 | 0.04049  | 0.16608  | 1310.19 | 1353.38 | 1132.52 | 1057.44 | 1135.39 | 946.363 | Down |
| Igfbpl1   | 5.23416 | -2.7603 | 1.33691 | -2.0647 | 0.03895  | NA       | 13.709  | 1.97286 | 11.6955 | 2.03943 | 0       | 1.98816 | Down |
| Stra6l    | 403.063 | 3.2061  | 0.30321 | 10.5737 | 3.95E-26 | 4.67E-23 | 92.046  | 95.6837 | 48.7314 | 696.465 | 941.693 | 543.761 | Up   |
| Ccdc180   | 3425.57 | -0.6553 | 0.25734 | -2.5463 | 0.01089  | 0.06574  | 5036.09 | 2883.33 | 4651.9  | 2838.89 | 1890.6  | 3252.62 | Down |
| Trim14    | 1443.53 | 0.20614 | 0.10335 | 1.99457 | 0.04609  | 0.18094  | 1274.94 | 1328.72 | 1418.08 | 1466.35 | 1583.57 | 1589.53 | Up   |
| Coro2a    | 1760.01 | 0.63543 | 0.32118 | 1.97842 | 0.04788  | 0.18583  | 1057.55 | 831.56  | 2246.52 | 1999.66 | 2236.78 | 2187.97 | Up   |
| Tbc1d2    | 1492.85 | 0.67619 | 0.19365 | 3.49186 | 0.00048  | 0.00625  | 1048.74 | 1256.71 | 1142.26 | 1746.77 | 2320.23 | 1442.41 | Up   |
| Tgfr1     | 4485.55 | 0.67047 | 0.10636 | 6.30388 | 2.90E-10 | 2.89E-08 | 3610.36 | 3660.64 | 3113.93 | 5288.24 | 5629.55 | 5610.58 | Up   |
| Cavin4    | 56.001  | -0.8556 | 0.38893 | -2.1998 | 0.02782  | 0.12818  | 97.9213 | 47.3486 | 71.1478 | 44.8675 | 32.9696 | 41.7513 | Down |
| Plppr1    | 6.21348 | -2.6702 | 1.23923 | -2.1548 | 0.03118  | NA       | 7.8337  | 1.97286 | 22.4164 | 2.03943 | 1.0303  | 1.98816 | Down |
| Acnat1    | 26.1779 | -3.0307 | 0.7904  | -3.8344 | 0.00013  | 0.00224  | 82.2539 | 19.7286 | 38.0105 | 4.07886 | 2.0606  | 10.9349 | Down |
| Nipsnap3l | 2468.88 | 0.24877 | 0.11742 | 2.11856 | 0.03413  | 0.14802  | 2358.92 | 2403.93 | 2006.76 | 2605.37 | 2846.71 | 2591.56 | Up   |
| 4930412U  | 15.5328 | -4.4671 | 0.98882 | -4.5176 | 6.26E-06 | 0.00019  | 27.418  | 33.5386 | 28.2642 | 0       | 0       | 3.97631 | Down |
| Fsd1l     | 2899.42 | -0.6759 | 0.23275 | -2.9038 | 0.00369  | 0.02995  | 4034.36 | 2728.46 | 3936.52 | 2301.5  | 1608.3  | 2787.4  | Down |
| Tal2      | 31.0474 | 1.18693 | 0.54402 | 2.18177 | 0.02913  | 0.13237  | 25.4595 | 18.7422 | 12.6702 | 56.0843 | 21.6363 | 51.6921 | Up   |
| Epb414b   | 5807.71 | -0.5567 | 0.15885 | -3.5044 | 0.00046  | 0.00601  | 6564.64 | 5929.43 | 8249.25 | 5263.77 | 4321.07 | 4518.09 | Down |
| Pakap     | 110.747 | -1.2949 | 0.28041 | -4.6179 | 3.88E-06 | 0.00012  | 175.279 | 130.209 | 166.661 | 71.38   | 47.3937 | 73.5618 | Down |
| Svep1     | 2741.88 | 0.30543 | 0.13866 | 2.20276 | 0.02761  | 0.12744  | 2149.37 | 2806.39 | 2402.46 | 2764.45 | 3176.41 | 3152.22 | Up   |
| Ecpas     | 4957.58 | 0.24881 | 0.09004 | 2.76338 | 0.00572  | 0.0413   | 4365.33 | 4502.06 | 4725.97 | 5128.15 | 5645.01 | 5378.96 | Up   |
| Susd1     | 331.678 | 0.5522  | 0.16491 | 3.34855 | 0.00081  | 0.00932  | 249.699 | 308.752 | 248.53  | 377.295 | 384.301 | 421.489 | Up   |
| Ptbp3     | 8898.95 | 0.33415 | 0.09822 | 3.40221 | 0.00067  | 0.00803  | 7722.07 | 8446.8  | 7450.05 | 9385.46 | 10399.8 | 9989.5  | Up   |
| Slc31a2   | 2767.28 | 0.43117 | 0.11543 | 3.73523 | 0.00019  | 0.00304  | 2410.82 | 2528.22 | 2131.51 | 2944.94 | 3265.02 | 3323.2  | Up   |
| Fkbp15    | 3754.21 | 0.52728 | 0.09119 | 5.78217 | 7.37E-09 | 5.58E-07 | 3099.21 | 3119.09 | 3008.67 | 4379.68 | 4715.68 | 4202.96 | Up   |
| Prpf4     | 1339.79 | -0.2303 | 0.11419 | -2.0167 | 0.04372  | 0.17471  | 1581.43 | 1379.03 | 1379.1  | 1176.75 | 1229.15 | 1293.3  | Down |
| Rnf183    | 29.7429 | -0.8807 | 0.43024 | -2.047  | 0.04066  | 0.1665   | 29.3764 | 44.3893 | 41.909  | 18.3549 | 19.5757 | 24.852  | Down |
| Wdr31     | 776.526 | -0.9245 | 0.26475 | -3.4919 | 0.00048  | 0.00625  | 1170.16 | 761.524 | 1119.85 | 621.006 | 353.392 | 633.228 | Down |
| 4933430U  | 28.4104 | 1.51403 | 0.61537 | 2.46035 | 0.01388  | 0.07876  | 7.8337  | 26.6336 | 9.74627 | 33.6506 | 60.7876 | 31.8105 | Up   |
| Zfp618    | 123.807 | 1.13652 | 0.26348 | 4.31349 | 1.61E-05 | 0.00041  | 98.9005 | 69.0501 | 64.3254 | 158.056 | 158.666 | 193.845 | Up   |
| Gm11212   | 45.3376 | -0.6599 | 0.32712 | -2.0173 | 0.04367  | 0.17455  | 54.8359 | 55.2401 | 56.5284 | 30.5914 | 36.0604 | 38.7691 | Down |
| Whrn      | 508.051 | -0.3637 | 0.14253 | -2.5521 | 0.01071  | 0.0651   | 552.276 | 602.708 | 560.411 | 476.207 | 390.483 | 466.223 | Down |
| Atp6v1g1  | 10493.8 | 0.2084  | 0.07939 | 2.62487 | 0.00867  | 0.05574  | 9802.9  | 9761.71 | 9646.86 | 11660.4 | 11382.7 | 10708.2 | Up   |
| Tmem268   | 2436.46 | 0.42743 | 0.10946 | 3.90472 | 9.43E-05 | 0.00177  | 1985.84 | 2307.26 | 1941.46 | 2782.8  | 2765.32 | 2836.11 | Up   |
| Tnfsf15   | 281.539 | 1.20248 | 0.24126 | 4.98427 | 6.22E-07 | 2.70E-05 | 120.443 | 200.245 | 191.027 | 340.585 | 393.574 | 443.359 | Up   |
| 8030451A  | 33.6695 | -1.0467 | 0.40714 | -2.5708 | 0.01015  | 0.06256  | 39.1685 | 39.4572 | 57.503  | 20.3943 | 21.6363 | 23.8579 | Down |
| Tlr4      | 3034.4  | 0.58579 | 0.12426 | 4.71433 | 2.43E-06 | 8.53E-05 | 2684.02 | 2503.56 | 2092.52 | 3582.26 | 3669.92 | 3674.11 | Up   |
| Brinp1    | 197.962 | 0.56757 | 0.24609 | 2.3064  | 0.02109  | 0.10605  | 153.736 | 182.489 | 142.296 | 189.667 | 301.877 | 217.703 | Up   |
| 2310002U  | 6.03808 | -4.0938 | 1.98938 | -2.0578 | 0.03961  | NA       | 27.418  | 0       | 6.82239 | 0       | 0       | 1.98816 | Down |
| Ttc39b    | 3140.13 | 0.24092 | 0.09675 | 2.49003 | 0.01277  | 0.0739   | 2889.66 | 3069.77 | 2676.33 | 3321.21 | 3416.47 | 3467.35 | Up   |
| Ccdc171   | 2624.85 | 0.66254 | 0.24429 | 2.71209 | 0.00669  | 0.04607  | 1453.15 | 2707.75 | 1936.58 | 3389.53 | 3743.07 | 2518.99 | Up   |
| Sh3gl2    | 231.577 | -0.65   | 0.28503 | -2.2805 | 0.02258  | 0.11055  | 326.078 | 173.612 | 348.917 | 181.509 | 183.393 | 175.952 | Down |
| Gm12551   | 5.23369 | 2.80898 | 1.24683 | 2.2529  | 0.02427  | NA       | 1.95843 | 0.98643 | 0.97463 | 18.3549 | 5.15149 | 3.97631 | Up   |
| Dennd4c   | 1960.14 | 0.38436 | 0.10226 | 3.75869 | 0.00017  | 0.00283  | 1793.92 | 1694.69 | 1613.01 | 2231.14 | 2332.6  | 2095.52 | Up   |
| Hacd4     | 910.581 | 0.31294 | 0.13567 | 2.3066  | 0.02108  | 0.10605  | 712.867 | 868.058 | 855.723 | 929.98  |         |         |      |

|          |         |         |         |         |          |          |         |         |         |         |         |         |      |
|----------|---------|---------|---------|---------|----------|----------|---------|---------|---------|---------|---------|---------|------|
| Gm12708  | 23.1635 | 1.34784 | 0.53304 | 2.5286  | 0.01145  | 0.06807  | 10.7713 | 11.8372 | 16.5687 | 28.552  | 47.3937 | 23.8579 | Up   |
| Gm12695  | 383.744 | -1.2314 | 0.37926 | -3.2468 | 0.00117  | 0.01246  | 628.655 | 311.712 | 674.442 | 250.85  | 124.666 | 312.141 | Down |
| L1td1    | 29.6733 | -1.2109 | 0.56606 | -2.1392 | 0.03242  | 0.14268  | 28.3972 | 35.5115 | 60.4269 | 27.5323 | 9.27269 | 16.8993 | Down |
| Atg4c    | 1013.55 | 0.4767  | 0.11503 | 4.14396 | 3.41E-05 | 0.00076  | 820.58  | 899.624 | 822.585 | 1132.9  | 1271.39 | 1134.24 | Up   |
| Jak1     | 10188.1 | 0.26393 | 0.09936 | 2.65644 | 0.0079   | 0.05197  | 9304.48 | 9843.58 | 8628.38 | 10439.8 | 11592.9 | 11319.6 | Up   |
| E130102H | 162.425 | 0.38034 | 0.18985 | 2.00339 | 0.04514  | 0.17836  | 155.695 | 135.141 | 132.549 | 187.628 | 189.575 | 173.964 | Up   |
| Leprot   | 5900.79 | 0.27219 | 0.11166 | 2.43769 | 0.01478  | 0.08264  | 5254.46 | 5574.31 | 5208.41 | 6621.01 | 6997.79 | 5748.76 | Up   |
| Lepr     | 3814.93 | 0.24112 | 0.11564 | 2.08506 | 0.03706  | 0.15681  | 3628.96 | 3195.05 | 3666.55 | 3764.79 | 4430.28 | 4203.96 | Up   |
| InsI5    | 93.0283 | -1.0927 | 0.28418 | -3.8452 | 0.00012  | 0.00216  | 119.464 | 113.439 | 147.169 | 49.966  | 53.5755 | 74.5559 | Down |
| Wdr78    | 3046.85 | -0.6632 | 0.23462 | -2.8265 | 0.00471  | 0.0358   | 4276.22 | 2800.47 | 4128.52 | 2489.12 | 1698.96 | 2887.8  | Down |
| Oma1     | 2072.61 | 0.25516 | 0.10842 | 2.35346 | 0.0186   | 0.09738  | 1883.03 | 2029.09 | 1757.25 | 2356.56 | 2290.35 | 2119.38 | Up   |
| Gm12718  | 16.5822 | 1.39222 | 0.55115 | 2.52602 | 0.01154  | 0.06846  | 8.81291 | 9.8643  | 8.77165 | 19.3746 | 27.8181 | 24.852  | Up   |
| Dab1     | 260.046 | -0.8691 | 0.32225 | -2.6969 | 0.007    | 0.04751  | 435.75  | 198.272 | 374.257 | 212.101 | 139.09  | 200.804 | Down |
| Fyb2     | 289.339 | 1.99853 | 0.26647 | 7.49993 | 6.39E-14 | 1.33E-11 | 120.443 | 72.9958 | 153.991 | 481.305 | 444.059 | 463.241 | Up   |
| Gm12729  | 21.2869 | -1.1582 | 0.50805 | -2.2796 | 0.02263  | 0.11067  | 23.5011 | 32.5522 | 32.1627 | 16.3154 | 9.27269 | 13.9171 | Down |
| Pcsm9    | 27.39   | -1.0473 | 0.47652 | -2.1978 | 0.02796  | 0.12865  | 37.2101 | 41.43   | 32.1627 | 12.2366 | 15.4545 | 25.846  | Down |
| Dhcr24   | 1997.87 | 0.49304 | 0.14432 | 3.41624 | 0.00063  | 0.00775  | 1890.86 | 1456.96 | 1631.53 | 2118.97 | 2319.2  | 2569.69 | Up   |
| Acot11   | 242.517 | 0.39691 | 0.16325 | 2.43132 | 0.01504  | 0.08356  | 207.593 | 205.177 | 215.393 | 267.165 | 257.575 | 302.2   | Up   |
| Cyb5r1   | 855.165 | -0.6515 | 0.12272 | -5.3083 | 1.11E-07 | 6.07E-06 | 1059.51 | 1038.71 | 1037    | 701.564 | 591.391 | 702.814 | Down |
| Hspb11   | 766.854 | -0.4883 | 0.17752 | -2.7507 | 0.00595  | 0.04249  | 1022.3  | 762.51  | 901.53  | 617.947 | 553.27  | 743.571 | Down |
| Dio1     | 777.436 | -0.8322 | 0.38536 | -2.1596 | 0.03081  | 0.13749  | 1253.39 | 549.441 | 1184.17 | 655.677 | 283.332 | 738.6   | Down |
| Lrp8     | 260.152 | 1.25539 | 0.28283 | 4.43874 | 9.05E-06 | 0.00026  | 164.508 | 160.788 | 135.473 | 285.52  | 522.361 | 292.259 | Up   |
| Podn     | 1750.47 | 0.46475 | 0.09493 | 4.89591 | 9.79E-07 | 3.90E-05 | 1419.86 | 1546.72 | 1446.35 | 2054.73 | 1957.77 | 2077.62 | Up   |
| Echdc2   | 2008.42 | -0.2871 | 0.11742 | -2.4448 | 0.01449  | 0.0815   | 2027.95 | 2480.87 | 2113.97 | 1793.68 | 1829.81 | 1804.25 | Down |
| Shisal2a | 311.806 | -0.8085 | 0.25636 | -3.154  | 0.00161  | 0.01584  | 382.872 | 332.427 | 475.618 | 286.54  | 161.757 | 231.62  | Down |
| Rab3b    | 138.868 | 1.05848 | 0.25469 | 4.15604 | 3.24E-05 | 0.00073  | 93.0252 | 68.0636 | 109.158 | 211.081 | 168.969 | 182.91  | Up   |
| Ttc39a   | 4203.18 | -0.4773 | 0.22329 | -2.1377 | 0.03254  | 0.14311  | 5916.4  | 3456.45 | 5303.92 | 3615.91 | 2846.71 | 4079.7  | Down |
| Agbl4    | 301.91  | -1.249  | 0.34472 | -3.6233 | 0.00029  | 0.00427  | 525.837 | 221.947 | 527.273 | 183.549 | 140.121 | 212.733 | Down |
| Pdzk1ip1 | 1489.95 | 0.36644 | 0.12207 | 3.00187 | 0.00268  | 0.02359  | 1308.23 | 1194.57 | 1402.49 | 1578.52 | 1625.81 | 1830.1  | Up   |
| Cyp4a12a | 37.6689 | 3.2441  | 0.6401  | 5.06814 | 4.02E-07 | 1.85E-05 | 6.85449 | 8.87787 | 5.84776 | 123.386 | 43.2725 | 37.775  | Up   |
| Cyp4b1   | 24933.6 | -0.2905 | 0.10641 | -2.7303 | 0.00633  | 0.04437  | 28017.2 | 26796.4 | 27493.3 | 24845.4 | 22007.2 | 20442.2 | Down |
| Mknk1    | 2776.13 | 0.29845 | 0.09526 | 3.13312 | 0.00173  | 0.01675  | 2361.86 | 2628.83 | 2479.45 | 3004.08 | 2979.62 | 3202.92 | Up   |
| Rad54l   | 59.783  | 0.72397 | 0.34623 | 2.09103 | 0.03653  | 0.15529  | 30.3556 | 51.2943 | 53.6045 | 83.6166 | 75.2118 | 64.6151 | Up   |
| Gpbp1l1  | 2096.7  | 0.33814 | 0.10561 | 3.20187 | 0.00137  | 0.01399  | 1909.46 | 1787.41 | 1859.59 | 2236.23 | 2234.72 | 2552.79 | Up   |
| Ccdc17   | 6806.38 | -0.9471 | 0.21871 | -4.3305 | 1.49E-05 | 0.00038  | 9321.13 | 6948.41 | 10621.5 | 5421.82 | 3426.77 | 5098.63 | Down |
| Akr1a1   | 29987.1 | 0.25064 | 0.07824 | 3.20342 | 0.00136  | 0.01393  | 27048.8 | 27621   | 27496.2 | 33035.7 | 33740.2 | 30980.5 | Up   |
| Ptch2    | 225.105 | 0.56599 | 0.25909 | 2.18455 | 0.02892  | 0.13185  | 158.632 | 237.73  | 148.143 | 257.988 | 322.483 | 225.656 | Up   |
| Tctex1d4 | 1824.11 | -1.1099 | 0.26172 | -4.241  | 2.23E-05 | 0.00054  | 2708.5  | 1723.29 | 3047.66 | 1272.6  | 810.845 | 1381.77 | Down |
| Plk3     | 1282    | 0.61183 | 0.26738 | 2.28827 | 0.02212  | 0.10919  | 827.435 | 1274.47 | 940.515 | 1572.4  | 2050.29 | 1026.88 | Up   |
| Armhl    | 817.712 | -0.8677 | 0.29795 | -2.9121 | 0.00359  | 0.02939  | 1183.87 | 839.452 | 1146.16 | 604.691 | 334.847 | 797.251 | Down |
| Med8     | 3350.97 | 0.28634 | 0.10495 | 2.72847 | 0.00636  | 0.04454  | 3173.63 | 2928.71 | 2956.04 | 3913.67 | 3767.8  | 3365.95 | Up   |
| Elov1    | 57067.4 | 0.79959 | 0.18039 | 4.43259 | 9.31E-06 | 0.00026  | 39096   | 52944.6 | 32896.6 | 72665.9 | 75971.1 | 68830   | Up   |
| Mpl      | 94.9461 | -1.3641 | 0.31067 | -4.3909 | 1.13E-05 | 0.00031  | 114.568 | 112.453 | 183.23  | 57.104  | 54.6058 | 47.7158 | Down |
| Cfap57   | 1407.95 | -0.786  | 0.29354 | -2.6776 | 0.00742  | 0.04954  | 2217.92 | 1090    | 2038.92 | 1142.08 | 719.148 | 1239.62 | Down |
| Ebna1bp2 | 2393.3  | -0.2029 | 0.09726 | -2.0858 | 0.03699  | 0.15664  | 2675.21 | 2620.94 | 2387.84 | 2240.31 | 2147.14 | 2288.37 | Down |
| Ccdc30   | 2637.5  | -0.8485 | 0.25751 | -3.2949 | 0.00098  | 0.01087  | 3912.93 | 2325.01 | 3936.52 | 2100.61 | 1330.22 | 2219.78 | Down |
| Zmynd12  | 643.177 | -1.0132 | 0.28277 | -3.5831 | 0.00034  | 0.00479  | 1044.82 | 552.401 | 983.399 | 424.201 | 320.423 | 533.82  | Down |
| Rimkl    | 49.3395 | -1.7319 | 0.53804 | -3.2189 | 0.00129  | 0.01339  | 68.5449 | 99.6294 | 59.4523 | 19.3746 | 9.27269 | 39.7631 | Down |
| Foxo6    | 134.301 | -0.6347 | 0.22079 | -2.8747 | 0.00404  | 0.03191  | 143.944 | 176.571 | 169.585 | 119.307 | 100.969 | 95.4315 | Down |
| Foxo6os  | 3.75589 | -3.3535 | 1.69226 | -1.9817 | 0.04751  | NA       | 1.95843 | 5.91858 | 12.6702 | 0       | 0       | 1.98816 | Down |
| Ctps     | 7856.09 | 0.70589 | 0.18807 | 3.75339 | 0.00017  | 0.00287  | 4911.73 | 7793.78 | 5209.38 | 9537.39 | 9402.5  | 10281.8 | Up   |
| Gm8439   | 32.4737 | 4.7746  | 0.69907 | 6.82991 | 8.50E-12 | 1.14E-09 | 2.93764 | 3.94572 | 0       | 56.0843 | 75.2118 | 56.6625 | Up   |
| Gm12860  | 32.5924 | 1.99519 | 0.44682 | 4.46534 | 7.99E-06 | 0.00023  | 16.6466 | 12.8236 | 9.74627 | 42.828  | 61.8179 | 51.6921 | Up   |
| Cited4   | 274.133 | 1.6893  | 0.25438 | 6.64083 | 3.12E-11 | 3.93E-09 | 110.651 | 152.897 | 125.727 | 387.492 | 542.967 | 325.064 | Up   |
| Kcnq4    | 251.847 | 0.35355 | 0.15501 | 2.2808  | 0.02256  | 0.11052  | 225.219 | 216.028 | 222.215 | 267.165 | 280.241 | 300.212 | Up   |
| Rims3    | 215.837 | 1.00415 | 0.33784 | 2.9723  | 0.00296  | 0.02541  | 148.84  | 190.381 | 91.615  | 250.85  | 395.635 | 217.703 | Up   |
| Gm12892  | 164.921 | -5.3695 | 1.26545 | -4.2432 | 2.20E-05 | 0.00053  | 717.763 | 232.797 | 15.594  | 10.1971 | 7.21209 | 5.96447 | Down |
| Ppt1     | 5700.31 | 0.34832 | 0.10894 | 3.19737 | 0.00139  | 0.01415  | 5283.83 | 5205.39 | 4557.36 | 5932.7  | 6599.06 | 6623.55 | Up   |
| Cap1     | 17026.7 | 0.33445 | 0.109   | 3.06832 | 0.00215  | 0.01995  | 14842.9 | 16443.8 | 13899.2 | 18612.9 | 20339.1 | 18022.6 | Up   |
| Ndufs5   | 1689.89 | -0.2504 | 0.12509 | -2.002  | 0.04528  | 0.17877  | 2081.81 | 1710.47 | 1716.32 | 1611.15 | 1486.72 | 1532.87 | Down |
| Rhbd12   | 282.026 | 0.87127 | 0.32432 | 2.68641 | 0.00722  | 0.04866  | 267.325 | 107.521 | 223.19  | 339.565 | 425.513 | 329.04  | Up   |
| Gm12905  | 703.903 | -0.5607 | 0.21555 | -2.6011 | 0.00929  | 0.05851  | 1040.9  | 612.573 | 863.52  | 581.237 | 505.877 | 619.311 | Down |
| Rragc    | 6063.91 | 0.29885 | 0.10254 | 2.91452 | 0.00356  | 0.0292   | 5224.1  | 5767.65 | 5322.44 | 6414.01 | 7255.36 | 6399.88 | Up   |
| Utp11    | 2168.93 | -0.2757 | 0.11442 | -2.4098 | 0.01596  | 0.08739  | 2548.89 | 2376.31 | 2201.68 | 1898.71 | 1859.69 | 2128.32 | Down |
| Fhl3     | 176.013 | 0.62958 | 0.23586 | 2.66927 | 0.0076   | 0.05043  | 174.3   | 127.249 | 113.057 | 195.785 | 235.938 | 209.751 | Up   |
| Inpp5b   | 7559.1  | 0.31752 | 0.13031 | 2.43658 | 0.01483  | 0.08275  | 6727.19 | 7670.48 | 5794.16 | 8361.66 | 8714.26 | 8086.83 | Up   |
| Dnali1   | 4017    | -0.833  | 0.26579 | -3.1342 | 0.00172  | 0.01671  | 6092.66 | 3613.29 | 5730.81 | 3099.93 | 1935.93 | 3629.38 | Down |
| Zc3h12a  | 1304.48 | 0.95133 | 0.15104 | 6.29847 | 3.01E-10 | 2.95E-08 | 930.252 | 817.75  | 920.048 | 1754.93 | 1447.57 | 1956.35 | Up   |
| Oscp1    | 1531.85 | -0.8689 | 0.26659 | -3.2592 | 0.00112  | 0.012    | 2272.75 | 1615.77 | 2050.62 | 1173.69 | 668.664 | 1409.6  | Down |
| Col8a2   | 2077.63 | -0.9261 | 0.22317 | -4.15   | 3.32E-05 | 0.00075  | 2928.83 | 2052.76 | 3186.06 | 1461.25 | 1097.27 | 1739.64 | Down |
| Tekt2    | 532.786 | -0.9697 | 0.19637 | -4.938  | 7.89E-07 | 3.25E-05 | 617.883 | 683.596 | 814.788 | 388.511 | 284.362 | 407.572 | Down |
| Zmym1    | 402.046 | -0.6895 | 0.26482 | -2.6036 | 0.00922  | 0.05829  | 613.966 | 400.49  | 474.643 | 320.19  | 214.302 | 388.685 | Down |
| Gjb3     | 242.196 | 0.91021 | 0.34009 | 2.67642 | 0.00744  | 0.04966  | 127.298 | 267.322 | 110.133 | 321.21  | 281.271 | 345.939 | Up   |
| Gjb4     | 55.7727 | 1.16762 | 0.14365 | 2.82276 | 0.00476  | 0.03604  | 24.4803 | 54.2536 | 24.3657 | 80.5575 | 81.3936 | 69.5855 | Up   |
| Azin2    | 2054.96 | -0.6947 | 0.41265 | -4.8904 | 1.01E-06 | 4.00E-05 | 2760.4  | 2397.02 | 2463.86 | 1690.69 | 1322.9  | 1694.9  | Down |
| Fndc5    | 255.599 | -1.8867 | 0.47621 | -3.962  | 7.43E-05 | 0.00146  | 596.341 | 144.019 | 466.846 | 117.267 | 66.9694 | 142.153 | Down |
| S100bbp  | 1821.62 | -0.378  | 0.1505  | -2.5118 | 0.01201  | 0.0706   | 2064.18 | 2108    | 2004.81 | 1456.15 |         |         |      |

|           |         |         |         |         |          |          |         |         |         |          |         |         |      |
|-----------|---------|---------|---------|---------|----------|----------|---------|---------|---------|----------|---------|---------|------|
| Fabp3     | 582.348 | -0.7459 | 0.37316 | -1.9988 | 0.04563  | 0.1796   | 1052.65 | 307.766 | 828.433 | 396.669  | 423.453 | 485.11  | Down |
| Sdc3      | 1484.15 | 0.55508 | 0.11413 | 4.86335 | 1.15E-06 | 4.48E-05 | 1121.2  | 1299.13 | 1186.12 | 1671.31  | 1746.36 | 1880.8  | Up   |
| Laptm5    | 9743.2  | 1.32456 | 0.20315 | 6.52    | 7.03E-11 | 7.98E-09 | 5865.48 | 6102.05 | 4713.3  | 13830.4  | 17516.1 | 10431.9 | Up   |
| Ptpu      | 3012.3  | -0.5429 | 0.20055 | -2.7068 | 0.00679  | 0.04656  | 3822.85 | 2689.99 | 4204.54 | 2650.24  | 2014.23 | 2691.96 | Down |
| Srsf4     | 1005.67 | 0.3137  | 0.12652 | 2.47938 | 0.01316  | 0.07565  | 923.398 | 807.886 | 959.033 | 1041.13  | 1111.69 | 1190.91 | Up   |
| Gm12992   | 94.9062 | 0.75779 | 0.23911 | 3.16928 | 0.00153  | 0.01524  | 67.5657 | 66.0908 | 77.9702 | 120.326  | 110.242 | 127.242 | Up   |
| Rcc1      | 748.517 | -0.3043 | 0.15319 | -1.9863 | 0.047    | 0.18333  | 768.682 | 940.067 | 772.879 | 606.73   | 653.209 | 749.535 | Down |
| Ptafr     | 376.435 | 0.81057 | 0.21443 | 3.78003 | 0.00016  | 0.00265  | 250.678 | 355.115 | 214.418 | 481.305  | 474.968 | 482.128 | Up   |
| Themis2   | 1343.38 | 0.85562 | 0.21241 | 4.02806 | 5.62E-05 | 0.00115  | 743.222 | 1223.17 | 902.505 | 1632.56  | 2036.9  | 1521.93 | Up   |
| Stx12     | 8871.58 | 0.24395 | 0.11862 | 2.05656 | 0.03973  | 0.1644   | 7924.77 | 9061.34 | 7383.78 | 9521.08  | 10284.4 | 9054.07 | Up   |
| Fgr       | 1585.78 | 1.11963 | 0.24199 | 4.62669 | 3.72E-06 | 0.00012  | 874.437 | 1352.39 | 771.905 | 1923.18  | 2689.08 | 1903.66 | Up   |
| Cd164l2   | 258.191 | 0.74213 | 0.24879 | 2.98288 | 0.00286  | 0.02476  | 171.362 | 244.635 | 163.737 | 283.481  | 283.332 | 402.602 | Up   |
| Sytl1     | 682.469 | -0.4553 | 0.15972 | -2.8507 | 0.00436  | 0.03379  | 761.828 | 728.971 | 877.165 | 579.198  | 494.543 | 653.11  | Down |
| Wdtdc1    | 2184.19 | -0.2833 | 0.09716 | -2.9155 | 0.00355  | 0.02912  | 2344.24 | 2523.29 | 2326.44 | 1868.12  | 1984.35 | 2058.74 | Down |
| Nudc      | 5943.63 | -0.4246 | 0.13272 | -3.199  | 0.00138  | 0.01409  | 7747.53 | 5924.5  | 6763.91 | 5295.38  | 4710.52 | 5219.91 | Down |
| Rps6ka1   | 4318.08 | 0.43716 | 0.11726 | 3.72809 | 0.00019  | 0.00311  | 3613.3  | 3455.46 | 3937.49 | 5186.27  | 5282.34 | 4433.59 | Up   |
| Crybg2    | 245.193 | -0.6108 | 0.30201 | -2.0224 | 0.04313  | 0.17313  | 348.6   | 209.123 | 331.373 | 179.47   | 141.151 | 261.443 | Down |
| Cd52      | 1615.18 | 0.26208 | 0.12732 | 2.0585  | 0.03954  | 0.16384  | 1472.74 | 1560.53 | 1373.25 | 1890.55  | 1844.23 | 1549.77 | Up   |
| Ubxn11    | 2646.43 | -0.6598 | 0.26605 | -2.4799 | 0.01314  | 0.07561  | 3525.17 | 2286.54 | 3912.15 | 2190.35  | 1385.75 | 2578.64 | Down |
| Sh3bgrl3  | 3839.37 | 0.6109  | 0.16263 | 3.75633 | 0.00017  | 0.00285  | 3166.77 | 2866.56 | 3081.77 | 4773.29  | 5465.73 | 3682.07 | Up   |
| Cep85     | 9017.66 | 4.5954  | 0.6559  | 7.00623 | 2.45E-12 | 3.65E-10 | 759.869 | 533.658 | 855.723 | 10860    | 32335.9 | 8760.81 | Up   |
| Grp1      | 913.292 | 0.34556 | 0.16684 | 2.0712  | 0.03834  | 0.1604   | 829.393 | 733.904 | 849.875 | 915.704  | 1235.33 | 915.546 | Up   |
| Trim63    | 20.9296 | -2.5766 | 1.13728 | -2.2656 | 0.02348  | 0.11357  | 70.5033 | 3.94572 | 33.1373 | 1.01971  | 2.0606  | 14.9112 | Down |
| Slc30a2   | 36.0748 | -1.6321 | 0.39036 | -4.1811 | 2.90E-05 | 0.00067  | 58.7528 | 49.3215 | 55.5538 | 20.3943  | 17.5151 | 14.9112 | Down |
| Ncmap     | 166.55  | 1.42481 | 0.31269 | 4.55662 | 5.20E-06 | 0.00016  | 88.1291 | 62.1451 | 120.854 | 285.52   | 262.726 | 179.928 | Up   |
| Stpg1     | 360.147 | -1.0312 | 0.26325 | -3.9173 | 8.96E-05 | 0.0017   | 551.297 | 335.386 | 564.309 | 265.126  | 181.333 | 263.431 | Down |
| Ifnlr1    | 1785.94 | 0.3145  | 0.12173 | 2.58349 | 0.00978  | 0.06074  | 1535.41 | 1540.8  | 1699.75 | 1987.42  | 2171.87 | 1780.39 | Up   |
| Myom3     | 447.266 | 0.65972 | 0.15321 | 4.30611 | 1.66E-05 | 0.00042  | 336.849 | 378.789 | 324.551 | 544.528  | 605.815 | 493.063 | Up   |
| Gm13000   | 14.7787 | -1.96   | 0.75077 | -2.6107 | 0.00904  | 0.05744  | 16.6466 | 28.6065 | 25.3403 | 3.05914  | 3.0909  | 11.9289 | Down |
| Pnrc2     | 7298.29 | 0.46775 | 0.13808 | 3.38742 | 0.00071  | 0.00834  | 6808.47 | 5357.3  | 6210.33 | 9012.24  | 8937.84 | 7463.54 | Up   |
| Fuca1     | 12002.4 | 0.83405 | 0.10687 | 7.8045  | 5.97E-15 | 1.53E-12 | 8216.57 | 9174.78 | 8488.03 | 15926.16 | 16236.5 | 13937   | Up   |
| Gale      | 1492.89 | 0.32171 | 0.12645 | 2.54416 | 0.01095  | 0.06603  | 1413    | 1228.1  | 1340.11 | 1785.52  | 1713.39 | 1477.2  | Up   |
| Zfp46     | 1319.49 | 0.56298 | 0.14102 | 3.99219 | 6.55E-05 | 0.00131  | 1084.97 | 1024.9  | 1085.73 | 1661.12  | 1737.08 | 1323.12 | Up   |
| Ephb2     | 289.055 | -1.382  | 0.38977 | -3.5456 | 0.00039  | 0.00534  | 537.588 | 206.164 | 509.73  | 150.918  | 110.242 | 219.691 | Down |
| C1qb      | 3417.62 | 0.57038 | 0.19613 | 2.90823 | 0.00363  | 0.02965  | 2402.99 | 3300.59 | 2548.65 | 3754.59  | 3048.23 | 5090.68 | Up   |
| C1qc      | 2757.48 | 0.54269 | 0.21422 | 2.53336 | 0.0113   | 0.0676   | 1928.07 | 2839.93 | 1966.8  | 3104.01  | 2659.2  | 4046.89 | Up   |
| C1qa      | 2955.79 | 0.57871 | 0.18728 | 3.08999 | 0.002    | 0.01881  | 2176.79 | 2707.75 | 2228    | 3214.14  | 2946.65 | 4461.42 | Up   |
| Wnt4      | 1702.68 | -1.0812 | 0.21981 | -4.9187 | 8.71E-07 | 3.54E-05 | 2610.58 | 1912.69 | 2414.15 | 973.828  | 864.42  | 1440.42 | Down |
| Rap1gap   | 4976.66 | 0.83749 | 0.13447 | 6.22818 | 4.72E-10 | 4.42E-08 | 3788.57 | 3005.65 | 3919.95 | 6765.81  | 6213.73 | 6166.27 | Up   |
| Alpl      | 649.217 | 1.00141 | 0.17958 | 5.57639 | 2.46E-08 | 1.59E-06 | 501.357 | 409.368 | 386.927 | 941.197  | 716.057 | 940.398 | Up   |
| 2310026L  | 39.403  | -0.901  | 0.41193 | -2.1872 | 0.02873  | 0.13118  | 53.8567 | 53.2672 | 46.7821 | 24.4732  | 39.1513 | 18.8875 | Down |
| Kif17     | 118.065 | -0.9438 | 0.30416 | -3.1029 | 0.00192  | 0.01814  | 198.78  | 103.575 | 163.737 | 76.4786  | 79.333  | 86.4848 | Down |
| Ubxn10    | 4312.07 | -0.8271 | 0.28152 | -2.938  | 0.0033   | 0.02756  | 6749.71 | 3708.98 | 6087.52 | 3181.51  | 2072.96 | 4071.75 | Down |
| Pla2g5    | 136.929 | 1.13175 | 0.50947 | 2.22141 | 0.02632  | 0.12342  | 157.653 | 31.5657 | 68.2239 | 223.318  | 137.03  | 203.786 | Up   |
| Gm13030   | 137.295 | 1.37715 | 0.53011 | 2.59785 | 0.00938  | 0.05886  | 132.194 | 24.6607 | 72.1224 | 238.613  | 121.575 | 234.603 | Up   |
| Akr7a5    | 1812.89 | -0.4396 | 0.11357 | -3.8702 | 0.00011  | 0.00199  | 1997.59 | 2231.3  | 2032.1  | 1590.76  | 1042.24 | 1623.33 | Down |
| Arhgef10l | 1321.79 | 0.66823 | 0.18413 | 3.62903 | 0.00028  | 0.00419  | 1001.73 | 1223.17 | 838.179 | 1676.41  | 1817.45 | 1373.82 | Up   |
| Rcc2      | 4833.42 | -0.299  | 0.09436 | -3.1685 | 0.00153  | 0.01526  | 5433.65 | 5124.5  | 5439.39 | 4474.51  | 4023.32 | 4505.16 | Down |
| Crocc     | 775.693 | -0.6256 | 0.19212 | -3.256  | 0.00113  | 0.01212  | 942.003 | 806.899 | 1075.01 | 680.15   | 479.089 | 671.003 | Down |
| Arhgef19  | 1016.46 | -0.6129 | 0.18969 | -3.2309 | 0.00123  | 0.01302  | 1239.68 | 1114.67 | 1333.29 | 915.704  | 603.755 | 891.688 | Down |
| Gm13056   | 140.54  | -0.81   | 0.24522 | -3.3031 | 0.00096  | 0.01061  | 186.05  | 167.693 | 183.23  | 128.484  | 80.3633 | 97.4197 | Down |
| Gm13074   | 115.627 | 1.5644  | 0.46154 | 3.38953 | 0.0007   | 0.00831  | 55.8151 | 50.3079 | 69.1985 | 203.943  | 66.9694 | 247.526 | Up   |
| Fam131c   | 150.759 | -1.4918 | 0.30185 | -4.9423 | 7.72E-07 | 3.20E-05 | 216.406 | 215.042 | 235.86  | 112.169  | 51.5149 | 73.5618 | Down |
| Fblim1    | 3125.14 | 0.23792 | 0.10501 | 2.26579 | 0.02346  | 0.11357  | 2631.14 | 3054.97 | 2918.03 | 3548.61  | 3235.14 | 3362.97 | Up   |
| Tmem82    | 160.025 | 0.49168 | 0.22193 | 2.21547 | 0.02673  | 0.12472  | 128.277 | 149.937 | 120.854 | 221.278  | 164.848 | 174.958 | Up   |
| Plekhn2   | 2973.75 | 0.37616 | 0.12314 | 3.05469 | 0.00225  | 0.02072  | 2539.1  | 2822.18 | 2403.43 | 3255.95  | 3718.35 | 3103.51 | Up   |
| Casp9     | 937.01  | 0.41715 | 0.12404 | 3.3631  | 0.00077  | 0.00895  | 810.788 | 828.601 | 768.006 | 985.045  | 1184.84 | 1044.78 | Up   |
| Efh2d     | 6876.38 | 0.48931 | 0.10406 | 4.70238 | 2.57E-06 | 8.89E-05 | 5325.94 | 5871.23 | 5966.67 | 8011.9   | 8606.08 | 7476.46 | Up   |
| Fhad1os2  | 954.049 | -0.9796 | 0.24457 | -4.0053 | 6.19E-05 | 0.00124  | 1442.38 | 906.529 | 1449.27 | 773.964  | 481.149 | 671.003 | Down |
| Fhad1     | 3060    | -0.6784 | 0.30395 | -2.232  | 0.02561  | 0.12092  | 4261.53 | 2388.15 | 4649.95 | 2475.87  | 1492.9  | 3091.58 | Down |
| Tmem51    | 1360.17 | 0.27245 | 0.13354 | 2.04023 | 0.04133  | 0.16839  | 1225    | 1265.59 | 1205.61 | 1415.36  | 1713.39 | 1336.04 | Up   |
| Gm13080   | 4.54561 | 2.57451 | 1.16488 | 2.21011 | 0.0271   | NA       | 1.95843 | 0.98643 | 0.97463 | 5.09857  | 10.303  | 7.95263 | Up   |
| Tnfrsf1b  | 3104.49 | 0.53909 | 0.17241 | 3.12686 | 0.00177  | 0.01703  | 2319.76 | 3174.33 | 2099.35 | 3555.75  | 3883.19 | 3594.59 | Up   |
| Tnfrsf8   | 110.727 | 1.19667 | 0.33507 | 3.57142 | 0.00036  | 0.00494  | 47.9814 | 69.0501 | 84.7926 | 179.47   | 106.121 | 176.946 | Up   |
| Gm13230   | 7.7722  | 3.44526 | 1.0706  | 3.21805 | 0.00129  | 0.01339  | 1.95843 | 0.98643 | 0.97463 | 22.4337  | 11.3333 | 8.94671 | Up   |
| Gm13212   | 133.605 | 0.79361 | 0.32151 | 2.46841 | 0.01357  | 0.07743  | 62.6696 | 132.182 | 98.4374 | 137.662  | 194.726 | 175.952 | Up   |
| Zfp992    | 201.497 | 1.15643 | 0.3762  | 3.07396 | 0.00211  | 0.01965  | 86.1707 | 139.087 | 149.118 | 173.352  | 429.634 | 231.62  | Up   |
| Zfp981    | 39.2642 | 2.24414 | 1.01528 | 2.21037 | 0.02708  | 0.12554  | 23.5011 | 0       | 17.5433 | 43.8477  | 129.818 | 20.8756 | Up   |
| Zfp993    | 13.5257 | 2.86115 | 1.08627 | 2.63391 | 0.00844  | 0.05469  | 5.87528 | 3.94572 | 0       | 6.11829  | 45.3331 | 19.8816 | Up   |
| Zfp989    | 1.87755 | 4.37919 | 2.22186 | 1.97096 | 0.04873  | NA       | 0       | 0       | 0       | 3.05914  | 7.21209 | 0.99408 | Up   |
| Zfp991    | 367.943 | 0.65569 | 0.20116 | 3.25954 | 0.00112  | 0.012    | 256.554 | 272.255 | 328.449 | 504.759  | 358.544 | 487.098 | Up   |
| Zfp534    | 3.23847 | 5.16645 | 2.43214 | 2.12424 | 0.03365  | NA       | 0       | 0       | 0       | 0        | 15.4545 | 3.97631 | Up   |
| Plod1     | 2802.25 | 0.39548 | 0.18818 | 2.10162 | 0.03559  | 0.15239  | 2670.31 | 2342.77 | 2248.47 | 2830.73  | 4079.98 | 2641.27 | Up   |
| Nppb      | 10.3631 | -1.8884 | 0.915   | -2.0638 | 0.03904  | 0.16243  | 24.4803 | 7.89144 | 16.5687 | 1.01971  | 8.24239 | 3.97631 | Down |
| Nppa      | 88.4571 | -6.4414 | 1.83765 | -3.5052 | 0.00046  | 0.006    | 489.606 | 1.97286 | 33.1373 | 1.01971  | 1.0303  | 3.97631 | Down |
| Fbxo44    | 816.7   | -0.3252 | 0.16064 | -2.0246 | 0.04291  | 0.17249  | 772.599 | 1012.08 | 940.515 | 771.924  | 634.664 | 768.423 | Down |
| Masp2     | 117.099 | -0.8319 | 0.21925 | -3.7944 | 0.00015  | 0.00254  | 136.111 | 153.883 | 159.839 | 88.7152  | 85.514  |         |      |

|          |         |         |         |         |          |          |         |         |         |         |         |         |      |
|----------|---------|---------|---------|---------|----------|----------|---------|---------|---------|---------|---------|---------|------|
| Spsb1    | 1556.5  | -0.5849 | 0.22812 | -2.5638 | 0.01035  | 0.06351  | 2339.34 | 1297.15 | 1966.8  | 1215.5  | 1080.78 | 1439.43 | Down |
| H6pd     | 9746.54 | 0.52914 | 0.13927 | 3.79944 | 0.00015  | 0.0025   | 6910.3  | 9184.65 | 7841.85 | 11781.8 | 12250.2 | 10510.4 | Up   |
| Slc2a5   | 33.4066 | -2.9215 | 0.79479 | -3.6758 | 0.00024  | 0.00366  | 110.651 | 10.8507 | 55.5538 | 9.17743 | 8.24239 | 5.96447 | Down |
| Eno1     | 6594.77 | 0.41628 | 0.12989 | 3.20487 | 0.00135  | 0.01388  | 5722.52 | 5574.31 | 5652.84 | 8551.33 | 6431.12 | 7636.51 | Up   |
| Thap3    | 1882.97 | -0.2765 | 0.10685 | -2.588  | 0.00965  | 0.06019  | 1904.57 | 2081.37 | 2202.66 | 1787.56 | 1652.6  | 1669.06 | Down |
| Tnfrsf25 | 386.244 | -0.579  | 0.19471 | -2.9738 | 0.00294  | 0.02531  | 457.292 | 513.93  | 417.14  | 301.836 | 254.484 | 372.779 | Down |
| Espn     | 595.18  | -0.6838 | 0.15725 | -4.3484 | 1.37E-05 | 0.00036  | 773.578 | 610.6   | 816.738 | 453.773 | 448.18  | 468.211 | Down |
| Hes2     | 44.3356 | -1.0057 | 0.38113 | -2.6388 | 0.00832  | 0.05407  | 50.9191 | 74.9687 | 51.6552 | 28.552  | 36.0604 | 23.8579 | Down |
| Gpr153   | 1277.22 | 0.55562 | 0.21358 | 2.60144 | 0.00928  | 0.05851  | 1064.4  | 1257.7  | 780.676 | 1596.87 | 1733.99 | 1229.68 | Up   |
| Rnf207   | 39.9298 | -1.6262 | 0.5672  | -2.867  | 0.00414  | 0.03243  | 60.7112 | 33.5386 | 86.7418 | 25.4929 | 8.24239 | 24.852  | Down |
| Chd5     | 135.116 | 0.99679 | 0.26431 | 3.77131 | 0.00016  | 0.00271  | 97.9213 | 94.6972 | 77.9702 | 170.292 | 226.666 | 143.147 | Up   |
| Nphp4    | 728.321 | -1.0149 | 0.29274 | -3.4668 | 0.00053  | 0.00672  | 1096.72 | 584.953 | 1241.68 | 434.399 | 401.816 | 610.364 | Down |
| Cep104   | 3576.97 | -0.2839 | 0.11938 | -2.3783 | 0.01739  | 0.09324  | 4190.05 | 3681.36 | 3912.15 | 3279.4  | 2882.78 | 3516.06 | Down |
| Trp73    | 1272.68 | -0.8679 | 0.28456 | -3.0499 | 0.00229  | 0.02097  | 1698.93 | 1253.75 | 1980.44 | 1024.81 | 540.907 | 1137.23 | Down |
| Prdm16os | 249.018 | -0.6007 | 0.28814 | -2.0849 | 0.03708  | 0.15684  | 298.66  | 288.037 | 313.83  | 163.154 | 141.151 | 289.277 | Down |
| Gm27202  | 64.7796 | -1.4439 | 0.35031 | -4.1217 | 3.76E-05 | 0.00082  | 108.693 | 88.7787 | 86.7418 | 47.9266 | 24.7272 | 31.8105 | Down |
| Gm13110  | 168.385 | -0.9892 | 0.29732 | -3.3271 | 0.00088  | 0.00988  | 165.487 | 201.232 | 305.058 | 111.149 | 133.939 | 93.4434 | Down |
| Ttc34    | 259.426 | -0.9932 | 0.46061 | -2.1564 | 0.03105  | 0.13824  | 356.433 | 196.299 | 483.415 | 198.844 | 70.0603 | 251.502 | Down |
| Mmel1    | 58.1143 | -1.1573 | 0.59012 | -1.9612 | 0.04986  | 0.19052  | 112.609 | 42.4165 | 85.7672 | 44.8675 | 11.3333 | 51.6921 | Down |
| Prxl2b   | 305.419 | -0.3253 | 0.14616 | -2.2256 | 0.02604  | 0.12234  | 332.932 | 331.44  | 354.764 | 285.52  | 254.484 | 273.372 | Down |
| Morn1    | 1249.49 | -0.7962 | 0.21934 | -3.6299 | 0.00028  | 0.00419  | 1840.92 | 1175.82 | 1740.68 | 960.571 | 722.239 | 1056.71 | Down |
| Cfap74   | 2295.04 | -0.9609 | 0.24782 | -3.8776 | 0.00011  | 0.00195  | 3446.83 | 2225.39 | 3424.84 | 1738.61 | 1076.66 | 1857.93 | Down |
| Tmem52   | 102.035 | -1.3729 | 0.28612 | -4.7983 | 1.60E-06 | 5.91E-05 | 149.82  | 114.426 | 177.382 | 49.966  | 65.9391 | 54.6743 | Down |
| Nadk     | 10792.9 | 0.22707 | 0.10864 | 2.09004 | 0.03661  | 0.15559  | 9885.15 | 10919.8 | 9030.9  | 11114.9 | 12082.3 | 11724.2 | Up   |
| Tmem88b  | 96.1002 | -0.973  | 0.25892 | -3.7581 | 0.00017  | 0.00284  | 118.485 | 114.426 | 149.118 | 68.3209 | 56.6664 | 69.5855 | Down |
| Ankrd65  | 1709.2  | -1.1222 | 0.26421 | -4.2475 | 2.16E-05 | 0.00052  | 2482.3  | 1729.21 | 2815.7  | 1142.08 | 716.057 | 1369.84 | Down |
| Cptp     | 1251.9  | 0.26715 | 0.09551 | 2.7971  | 0.00516  | 0.03826  | 1093.78 | 1174.84 | 1140.31 | 1388.85 | 1379.57 | 1334.05 | Up   |
| Pusl1    | 550.286 | 0.26328 | 0.12387 | 2.12541 | 0.03355  | 0.14631  | 505.274 | 503.079 | 492.187 | 612.849 | 633.634 | 554.696 | Up   |
| Acap3    | 1554.74 | 0.43833 | 0.15554 | 2.81819 | 0.00483  | 0.03637  | 1133.93 | 1272.49 | 1554.53 | 1899.73 | 1849.39 | 1618.36 | Up   |
| Ttll10   | 615.114 | -0.3617 | 0.17573 | -2.058  | 0.03959  | 0.16397  | 763.786 | 558.319 | 753.387 | 531.271 | 491.452 | 592.471 | Down |
| Agrr     | 15557.7 | 0.29602 | 0.13281 | 2.22888 | 0.02582  | 0.1215   | 11887.6 | 15495.8 | 14518   | 17620.7 | 17948.8 | 15875.4 | Up   |
| Cdk6     | 2346.22 | 0.25556 | 0.10661 | 2.39727 | 0.01652  | 0.08972  | 2013.26 | 2292.46 | 2111.04 | 2545.21 | 2708.65 | 2406.66 | Up   |
| Gatad1   | 3970.96 | -0.2233 | 0.0814  | -2.7437 | 0.00608  | 0.0431   | 4431.92 | 4238.69 | 4162.63 | 3587.36 | 3655.5  | 3749.66 | Down |
| Akap9    | 4999.6  | -0.3416 | 0.15407 | -2.2169 | 0.02663  | 0.12441  | 6173.94 | 4635.23 | 5956.92 | 4415.37 | 3920.29 | 4895.84 | Down |
| Cyp51    | 6281.05 | 0.43373 | 0.09618 | 4.50963 | 6.49E-06 | 0.00019  | 5454.22 | 5617.72 | 4959.88 | 7028.89 | 7570.63 | 7054.98 | Up   |
| Cdk14    | 4604.68 | 0.24468 | 0.10408 | 2.3508  | 0.01873  | 0.09789  | 3880.62 | 4395.53 | 4369.25 | 5333.11 | 4808.4  | 4841.16 | Up   |
| Cldn12   | 2833.41 | 0.54177 | 0.09227 | 5.87149 | 4.32E-09 | 3.45E-07 | 2340.32 | 2172.12 | 2410.25 | 3256.97 | 3377.32 | 3443.49 | Up   |
| Cfap69   | 5077.18 | -0.6618 | 0.2765  | -2.3933 | 0.0167   | 0.09047  | 7072.85 | 4228.82 | 7363.31 | 4228.78 | 2585.02 | 4983.32 | Down |
| Steap4   | 2583.26 | 0.708   | 0.26824 | 2.6394  | 0.00831  | 0.054    | 2643.87 | 1877.18 | 1364.48 | 2724.68 | 2668.47 | 4220.86 | Up   |
| Gm15731  | 11.5329 | -1.5895 | 0.74517 | -2.133  | 0.03292  | 0.14425  | 21.5427 | 14.7964 | 15.594  | 10.1971 | 3.0909  | 3.97631 | Down |
| Adam22   | 1458.57 | -0.3634 | 0.13211 | -2.7504 | 0.00595  | 0.04249  | 1766.5  | 1432.3  | 1725.09 | 1186.95 | 1280.66 | 1359.9  | Down |
| Abcb1a   | 1876.55 | 0.48113 | 0.13075 | 3.67978 | 0.00023  | 0.00362  | 1605.91 | 1632.54 | 1460.97 | 2272.94 | 2389.26 | 1897.7  | Up   |
| Crot     | 3002.76 | 0.38516 | 0.11946 | 3.22415 | 0.00126  | 0.01321  | 2694.79 | 2310.22 | 2807.9  | 3426.24 | 3188.77 | 3588.62 | Up   |
| Tmem243  | 8953.86 | 0.26385 | 0.10544 | 2.50227 | 0.01234  | 0.07199  | 8010.94 | 8903.51 | 7497.81 | 9916.73 | 9295.35 | 10098.8 | Up   |
| Hgf      | 468.702 | 0.45181 | 0.21411 | 2.11016 | 0.03484  | 0.15003  | 375.038 | 479.405 | 333.323 | 427.261 | 602.725 | 594.459 | Up   |
| Sema3c   | 28089.5 | 0.36017 | 0.12697 | 2.83672 | 0.00456  | 0.03497  | 21921.6 | 27118.9 | 24763.3 | 28765.1 | 34601.5 | 31366.2 | Up   |
| Gm43032  | 35.2052 | -0.8611 | 0.3729  | -2.3092 | 0.02093  | 0.10549  | 48.9606 | 46.3622 | 40.9343 | 24.4732 | 22.6666 | 27.8342 | Down |
| Gm29254  | 4.91438 | -3.7619 | 1.3784  | -2.7292 | 0.00635  | NA       | 8.81291 | 11.8372 | 6.82239 | 1.01971 | 0       | 0.99408 | Down |
| Ptpn12   | 8157.17 | 0.61416 | 0.11645 | 5.27425 | 1.33E-07 | 7.12E-06 | 6641.02 | 6547.92 | 6150.87 | 9593.48 | 11081.9 | 8927.82 | Up   |
| Gsap     | 10160.4 | 0.57134 | 0.1392  | 4.10449 | 4.05E-05 | 0.00088  | 7360.74 | 9560.48 | 7602.09 | 11432   | 13208.4 | 11798.7 | Up   |
| Fbxl13   | 1409.07 | -1.0516 | 0.33001 | -3.1867 | 0.00144  | 0.0145   | 2296.25 | 1193.58 | 2213.38 | 1033.99 | 522.361 | 1194.88 | Down |
| Armc10   | 3467.64 | 0.44166 | 0.11307 | 3.90624 | 9.37E-05 | 0.00176  | 2945.47 | 3129.94 | 2747.47 | 3689.33 | 4356.1  | 3937.55 | Up   |
| Napepld  | 1663.57 | -0.5149 | 0.24241 | -2.1241 | 0.03366  | 0.14653  | 2038.72 | 1480.63 | 2352.75 | 1486.74 | 967.45  | 1655.14 | Down |
| 5031425E | 2284.87 | -0.202  | 0.08332 | -2.4249 | 0.01531  | 0.08473  | 2428.45 | 2442.4  | 2462.88 | 2087.36 | 2196.6  | 2091.54 | Down |
| Al506816 | 1217.49 | 0.67111 | 0.24945 | 2.6904  | 0.00714  | 0.04822  | 800.996 | 682.609 | 1334.26 | 1349.08 | 1658.78 | 1479.19 | Up   |
| Pus7     | 944.805 | -0.4827 | 0.13664 | -3.5326 | 0.00041  | 0.00556  | 1130.99 | 1057.45 | 1115.95 | 708.702 | 752.118 | 903.617 | Down |
| Rint1    | 601.009 | 0.43616 | 0.1204  | 3.6227  | 0.00029  | 0.00427  | 495.482 | 496.174 | 540.918 | 692.386 | 659.391 | 721.701 | Up   |
| 2700038G | 76.1065 | -0.8984 | 0.32594 | -2.7564 | 0.00584  | 0.04194  | 119.464 | 109.494 | 68.2239 | 54.0449 | 57.6967 | 47.7158 | Down |
| Fam126a  | 2765.02 | -0.4011 | 0.09524 | -4.2108 | 2.54E-05 | 0.0006   | 3140.34 | 3141.78 | 3158.77 | 2376.96 | 2226.47 | 2545.84 | Down |
| Klhl7    | 2804.87 | -0.2322 | 0.11808 | -1.9669 | 0.04919  | 0.18905  | 3177.55 | 2767.92 | 3145.12 | 2583.96 | 2358.35 | 2796.34 | Down |
| Gm5575   | 5.0608  | -4.7499 | 1.59082 | -2.9858 | 0.00283  | NA       | 7.8337  | 4.93215 | 16.5687 | 0       | 1.0303  | 0       | Down |
| Kcnh2    | 575.502 | -0.52   | 0.12222 | -4.2543 | 2.10E-05 | 0.00051  | 667.823 | 649.071 | 717.326 | 493.542 | 473.937 | 451.312 | Down |
| Nos3     | 231.917 | -0.3277 | 0.16208 | -2.0217 | 0.0432   | 0.17339  | 268.304 | 266.336 | 239.758 | 207.002 | 213.272 | 196.828 | Down |
| Slc4a2   | 2333.07 | 0.32904 | 0.12364 | 2.66132 | 0.00778  | 0.05136  | 2311.92 | 1870.27 | 2022.35 | 2679.81 | 2419.14 | 2694.95 | Up   |
| Tmub1    | 617.703 | -0.2944 | 0.1278  | -2.3037 | 0.02124  | 0.10646  | 636.488 | 696.419 | 708.554 | 594.494 | 555.331 | 514.933 | Down |
| Asb10    | 11.834  | -1.6489 | 0.72749 | -2.2665 | 0.02342  | 0.1135   | 23.5011 | 12.8236 | 17.5433 | 5.09857 | 3.0909  | 8.94671 | Down |
| lqca11   | 6.71169 | -4.234  | 1.33937 | -3.1612 | 0.00157  | NA       | 11.7506 | 13.81   | 12.6702 | 2.03943 | 0       | 0       | Down |
| Chpf2    | 850.98  | 0.42353 | 0.12103 | 3.49927 | 0.00047  | 0.0061   | 693.283 | 751.659 | 735.844 | 1042.15 | 994.238 | 888.706 | Up   |
| Dpp6     | 307.406 | -1.8924 | 0.3861  | -4.9013 | 9.52E-07 | 3.82E-05 | 656.073 | 226.879 | 570.157 | 126.445 | 97.8784 | 167.005 | Down |
| Paxip1   | 2968.17 | -0.4042 | 0.16991 | -2.3792 | 0.01735  | 0.0931   | 3552.58 | 2686.05 | 3905.33 | 2635.96 | 2263.57 | 2765.53 | Down |
| Gm5551   | 3.21955 | 4.12042 | 1.72943 | 2.38254 | 0.01719  | NA       | 0       | 0.98643 | 0       | 10.1971 | 5.15149 | 2.98224 | Up   |
| Gm26608  | 14.5028 | -1.2841 | 0.59322 | -2.1647 | 0.03041  | 0.13641  | 22.5219 | 15.7829 | 23.3911 | 7.138   | 8.24239 | 9.94079 | Down |
| Insig1   | 8592.06 | 0.40627 | 0.15716 | 2.58517 | 0.00973  | 0.06054  | 7348.01 | 8174.54 | 6647.93 | 9589.4  | 11547.6 | 8244.89 | Up   |
| Cnpy1    | 545.045 | -0.4537 | 0.22932 | -1.9785 | 0.04788  | 0.18583  | 553.255 | 634.274 | 702.706 | 550.646 | 320.423 | 508.968 | Down |
| Rnf32    | 1336.41 | -0.5717 | 0.20232 | -2.8255 | 0.00472  | 0.03585  | 1585.35 | 1269.53 | 1938.53 | 1121.69 | 873.693 | 1229.68 | Down |
| Drc1     | 2793.54 | -1.0984 | 0.28002 | -3.9227 | 8.76E-05 | 0.00166  | 4450.52 | 2723.53 | 4251.32 | 1952.75 | 1109.63 | 2273.46 | Down |
| Fam166c  | 1116.01 | -0.977  | 0.24829 | -3.9349 | 8.32E-05 | 0.00159  | 1633.33 | 1065.34 | 1741.66 | 870.837 | 540.907 | 843.973 | Down |
|          |         |         |         |         |          |          |         |         |         |         |         |         |      |

|          |         |         |         |         |          |          |         |         |         |         |         |         |      |
|----------|---------|---------|---------|---------|----------|----------|---------|---------|---------|---------|---------|---------|------|
| Agbl5    | 1512.92 | -0.4185 | 0.20547 | -2.0368 | 0.04167  | 0.16936  | 1870.3  | 1366.21 | 1956.08 | 1362.34 | 1007.63 | 1514.98 | Down |
| Tcf23    | 220.159 | 0.85298 | 0.28937 | 2.94767 | 0.0032   | 0.0269   | 132.194 | 186.435 | 152.042 | 319.171 | 347.211 | 183.905 | Up   |
| Slc5a6   | 526.021 | 0.2773  | 0.13401 | 2.06918 | 0.03853  | 0.16098  | 491.565 | 449.812 | 485.364 | 593.474 | 613.028 | 522.885 | Up   |
| Trim54   | 18.29   | -3.1533 | 1.30357 | -2.419  | 0.01556  | 0.08588  | 48.9606 | 0       | 49.706  | 4.07886 | 1.0303  | 5.96447 | Down |
| Eif2b4   | 1798.66 | -0.2087 | 0.08844 | -2.36   | 0.01828  | 0.09622  | 1928.07 | 1865.34 | 1992.14 | 1680.49 | 1688.66 | 1637.25 | Down |
| Ift172   | 4674.42 | -0.5428 | 0.20003 | -2.7135 | 0.00666  | 0.04594  | 6146.52 | 4152.87 | 6331.18 | 3966.69 | 3129.02 | 4320.27 | Down |
| Fndc4    | 271.243 | -0.5571 | 0.19357 | -2.8782 | 0.004    | 0.03169  | 314.327 | 379.775 | 274.845 | 241.672 | 207.09  | 209.751 | Down |
| Gm20671  | 148.671 | -0.4195 | 0.21036 | -1.994  | 0.04615  | 0.18107  | 166.466 | 148.951 | 194.925 | 131.543 | 130.848 | 119.289 | Down |
| Slc5a1   | 1716.63 | 1.70493 | 0.18191 | 9.37237 | 7.09E-21 | 4.97E-18 | 787.287 | 895.678 | 734.869 | 2372.88 | 2230.6  | 3278.47 | Up   |
| Fam53a   | 1801.02 | -0.2431 | 0.11205 | -2.1698 | 0.03002  | 0.13517  | 1788.04 | 1959.05 | 2110.07 | 1622.37 | 1737.08 | 1589.53 | Down |
| Gm9903   | 14.5185 | -1.2826 | 0.61997 | -2.0688 | 0.03856  | 0.16109  | 29.3764 | 15.7829 | 16.5687 | 8.15772 | 9.27269 | 7.95263 | Down |
| Fgfr3    | 7469.58 | -0.3581 | 0.18268 | -1.9603 | 0.04996  | 0.19078  | 8823.69 | 6498.6  | 9853.48 | 7184.91 | 5598.64 | 6858.15 | Down |
| Gm1673   | 116.507 | -0.8134 | 0.29582 | -2.7497 | 0.00597  | 0.04253  | 138.069 | 118.372 | 189.078 | 104.011 | 67.9997 | 81.5144 | Down |
| Nat8l    | 236.857 | -1.6756 | 0.20377 | -8.2232 | 1.98E-16 | 6.82E-14 | 391.685 | 294.942 | 395.699 | 120.326 | 107.151 | 111.337 | Down |
| Poln     | 740.658 | -0.7031 | 0.24612 | -2.8566 | 0.00428  | 0.03335  | 976.275 | 648.084 | 1128.62 | 621.006 | 433.756 | 636.21  | Down |
| Gm43458  | 15.4767 | -1.4126 | 0.66385 | -2.1279 | 0.03335  | 0.14575  | 25.4595 | 10.8507 | 31.1881 | 10.1971 | 7.21209 | 7.95263 | Down |
| Tnrip2   | 1771.94 | 0.24308 | 0.11595 | 2.09635 | 0.03605  | 0.154    | 1615.7  | 1619.72 | 1633.48 | 1816.11 | 2152.29 | 1794.31 | Up   |
| Sh3bp2   | 1213.76 | 0.99926 | 0.20387 | 4.90137 | 9.52E-07 | 3.82E-05 | 755.952 | 968.674 | 703.681 | 1584.64 | 1982.29 | 1287.33 | Up   |
| Grk4     | 732.474 | -0.4144 | 0.19039 | -2.1767 | 0.0295   | 0.13353  | 811.767 | 686.555 | 1012.64 | 598.573 | 564.604 | 720.707 | Down |
| Htt      | 1150.29 | 0.32076 | 0.14313 | 2.24109 | 0.02502  | 0.11887  | 1003.69 | 1056.47 | 1008.74 | 1070.73 | 1345.57 | 1416.56 | Up   |
| Hgfac    | 985.786 | 0.77417 | 0.16092 | 4.811   | 1.50E-06 | 5.68E-05 | 615.925 | 757.578 | 808.941 | 1317.47 | 1079.75 | 1335.05 | Up   |
| Dok7     | 135.623 | -0.9695 | 0.29657 | -3.2691 | 0.00108  | 0.0117   | 215.427 | 142.046 | 181.281 | 87.6955 | 67.9997 | 119.289 | Down |
| Acox3    | 3895.83 | 0.58291 | 0.11537 | 5.05249 | 4.36E-07 | 1.99E-05 | 2975.83 | 3356.82 | 3025.24 | 4517.34 | 5155.61 | 4344.12 | Up   |
| Htra3    | 644.224 | -0.8396 | 0.24429 | -3.437  | 0.00059  | 0.00732  | 1093.78 | 725.026 | 660.797 | 528.212 | 498.664 | 358.862 | Down |
| Sh3tc1   | 2441.63 | 0.35692 | 0.15834 | 2.2542  | 0.02418  | 0.11618  | 2041.66 | 2421.68 | 1959.98 | 2635.96 | 3218.65 | 2371.87 | Up   |
| Ablim2   | 392.57  | -0.381  | 0.15545 | -2.4509 | 0.01425  | 0.08044  | 424.978 | 482.364 | 424.937 | 307.954 | 380.18  | 335.004 | Down |
| Afap1    | 1785.95 | 0.41578 | 0.16607 | 2.50362 | 0.01229  | 0.07181  | 1519.74 | 1819.96 | 1251.42 | 1926.24 | 2243.99 | 1954.36 | Up   |
| Sorcs2   | 5415.53 | 0.28123 | 0.14233 | 1.97589 | 0.04817  | 0.18643  | 4377.08 | 4640.16 | 5650.89 | 5646.16 | 5554.34 | 6624.54 | Up   |
| Ccdc96   | 1114.21 | -0.7885 | 0.28224 | -2.7936 | 0.00521  | 0.03858  | 1762.58 | 962.755 | 1508.72 | 825.969 | 562.543 | 1062.67 | Down |
| Tbc1d14  | 3858.16 | 0.32988 | 0.11781 | 2.80015 | 0.00511  | 0.03799  | 3580    | 3650.78 | 3026.22 | 4020.74 | 4469.43 | 4401.78 | Up   |
| Man2b2   | 5884.62 | 0.44432 | 0.07924 | 5.60747 | 2.05E-08 | 1.38E-06 | 4942.09 | 4829.56 | 5185.02 | 6824.95 | 6665    | 6861.13 | Up   |
| Ppp2r2c  | 977.273 | -1.0053 | 0.3084  | -3.2597 | 0.00112  | 0.012    | 1508.97 | 864.112 | 1540.89 | 667.913 | 406.968 | 874.789 | Down |
| Crmp1    | 30.7477 | 0.82126 | 0.40774 | 2.01416 | 0.04399  | 0.17537  | 18.605  | 25.6472 | 22.4164 | 44.8675 | 39.1513 | 33.7987 | Up   |
| Stx18    | 1251.17 | -0.2066 | 0.10319 | -2.0019 | 0.0453   | 0.17881  | 1409.09 | 1283.34 | 1329.39 | 1117.61 | 1149.81 | 1217.75 | Down |
| Otop1    | 6.85307 | -6.1986 | 1.85369 | -3.3439 | 0.00083  | NA       | 34.2724 | 1.97286 | 4.87314 | 0       | 0       | 0       | Down |
| Wdr1     | 10561.7 | 0.38469 | 0.08974 | 4.28664 | 1.81E-05 | 0.00045  | 9080.24 | 9555.54 | 8849.62 | 11419.8 | 12680.9 | 11783.8 | Up   |
| Clnk     | 74.1434 | -0.8599 | 0.41489 | -2.0726 | 0.03821  | 0.15999  | 125.339 | 57.2129 | 104.285 | 33.6506 | 59.7573 | 64.6151 | Down |
| Gm40293  | 19.8032 | -2.3851 | 1.10812 | -2.1524 | 0.03137  | 0.13907  | 68.5449 | 1.97286 | 29.2388 | 4.07886 | 2.0606  | 12.923  | Down |
| Gm42528  | 487.166 | 0.53545 | 0.19351 | 2.76713 | 0.00566  | 0.04091  | 340.766 | 466.581 | 385.952 | 551.666 | 679.997 | 498.033 | Up   |
| Cc2d2a   | 1953.03 | -0.4251 | 0.18916 | -2.2473 | 0.02462  | 0.11743  | 2337.38 | 1859.42 | 2519.41 | 1754.93 | 1311.57 | 1935.47 | Down |
| Fbxl5    | 9775.04 | 0.37377 | 0.09901 | 3.77511 | 0.00016  | 0.00268  | 8869.71 | 8789.09 | 7888.63 | 11103.7 | 11599.1 | 10400   | Up   |
| Bst1     | 3068.84 | 1.55453 | 0.21403 | 7.26322 | 3.78E-13 | 6.75E-11 | 1755.73 | 1773.6  | 1147.14 | 4400.07 | 5546.1  | 3790.42 | Up   |
| Fgfbp1   | 686.512 | -0.5495 | 0.25887 | -2.1227 | 0.03378  | 0.14689  | 796.1   | 655.976 | 995.094 | 621.006 | 371.938 | 678.956 | Down |
| Gm42984  | 282.716 | -0.5502 | 0.17599 | -3.1261 | 0.00177  | 0.01705  | 346.641 | 288.037 | 373.282 | 231.475 | 214.302 | 242.555 | Down |
| Slit2    | 2700.21 | 0.46467 | 0.15186 | 3.05985 | 0.00221  | 0.02043  | 1848.75 | 2572.61 | 2385.89 | 2957.17 | 3342.29 | 3094.57 | Up   |
| 5730480H | 503.07  | -0.3268 | 0.13638 | -2.3966 | 0.01655  | 0.08982  | 528.775 | 537.604 | 613.041 | 473.148 | 424.483 | 441.371 | Down |
| Adgra3   | 3480.63 | -0.2597 | 0.08989 | -2.8895 | 0.00386  | 0.03096  | 3801.3  | 3672.48 | 3905.33 | 3075.46 | 3350.53 | 3078.66 | Down |
| Ppargc1a | 268.048 | -0.7002 | 0.28996 | -2.4149 | 0.01574  | 0.08644  | 340.766 | 237.73  | 417.14  | 192.726 | 153.514 | 266.413 | Down |
| Pik42b   | 17310   | 0.2793  | 0.11224 | 2.4885  | 0.01283  | 0.0742   | 16215.8 | 16108.4 | 14595   | 19139   | 17108.1 | 20693.7 | Up   |
| 5033403H | 86.5403 | -0.9175 | 0.42463 | -2.1608 | 0.03071  | 0.13723  | 120.443 | 150.924 | 68.2239 | 49.966  | 41.2119 | 88.473  | Down |
| Slc34a2  | 203865  | 0.46193 | 0.19025 | 2.42806 | 0.01518  | 0.08407  | 181862  | 208195  | 124454  | 226529  | 253234  | 228915  | Up   |
| Sel1l3   | 1139.82 | 0.44523 | 0.1738  | 2.5617  | 0.01042  | 0.06377  | 1032.09 | 1009.12 | 854.748 | 1063.56 | 1542.36 | 1337.04 | Up   |
| Cckar    | 4781.7  | -1.0911 | 0.29689 | -3.6751 | 0.00024  | 0.00367  | 5754.83 | 5117.6  | 8652.74 | 3631.2  | 1775.2  | 3758.61 | Down |
| Tbc1d19  | 3218.9  | -0.4902 | 0.14524 | -3.3753 | 0.00074  | 0.00864  | 3883.56 | 3331.17 | 4067.12 | 2885.79 | 2273.87 | 2871.89 | Down |
| Gm43266  | 28.5573 | -1.1282 | 0.47572 | -2.3716 | 0.01771  | 0.09442  | 29.3764 | 38.4708 | 49.706  | 12.2366 | 22.6666 | 18.8875 | Down |
| Gm9954   | 43.6924 | 2.68418 | 0.54649 | 4.91171 | 9.03E-07 | 3.66E-05 | 3.91685 | 15.7829 | 15.594  | 59.1435 | 105.09  | 62.6269 | Up   |
| Nwd2     | 547.541 | 1.95959 | 0.24441 | 8.01752 | 1.08E-15 | 3.40E-13 | 201.718 | 190.381 | 279.718 | 373.338 | 1129.21 | 690.885 | Up   |
| 0610040J | 2555.1  | 0.37305 | 0.12657 | 2.94728 | 0.00321  | 0.02692  | 2414.74 | 1962.01 | 2303.04 | 2952.07 | 2648.9  | 3049.83 | Up   |
| Tlr6     | 151.419 | 0.67365 | 0.27698 | 2.43216 | 0.01501  | 0.08347  | 118.485 | 129.222 | 102.336 | 156.016 | 250.363 | 152.094 | Up   |
| Fam114a1 | 2100.15 | -0.2431 | 0.08432 | -2.8831 | 0.00394  | 0.03133  | 2267.86 | 2274.71 | 2287.45 | 1867.1  | 1980.23 | 1923.54 | Down |
| Tmem156  | 277.669 | 0.64071 | 0.19129 | 3.34935 | 0.00081  | 0.00931  | 214.448 | 234.77  | 201.748 | 308.974 | 403.877 | 302.2   | Up   |
| Wdr19    | 3186.14 | -0.9884 | 0.20595 | -4.7993 | 1.59E-06 | 5.90E-05 | 4497.52 | 3326.24 | 4886.78 | 2362.68 | 1631.99 | 2411.63 | Down |
| Klb      | 19.0555 | -1.6782 | 0.78348 | -2.142  | 0.03219  | 0.14204  | 53.8567 | 12.8236 | 20.4672 | 5.09857 | 6.18179 | 15.9053 | Down |
| Chrna9   | 124.112 | -1.1248 | 0.28264 | -3.9797 | 6.90E-05 | 0.00137  | 125.339 | 185.449 | 199.799 | 87.6955 | 63.8785 | 82.5085 | Down |
| 9130230L | 1266.96 | -0.9531 | 0.29625 | -3.2171 | 0.00129  | 0.01343  | 1446.3  | 1322.8  | 2243.59 | 1066.62 | 524.422 | 998.055 | Down |
| Nsun7    | 622.447 | -0.8056 | 0.14849 | -5.4253 | 5.78E-08 | 3.47E-06 | 890.104 | 753.632 | 731.945 | 425.221 | 433.756 | 500.022 | Down |
| Uchl1    | 317.203 | -0.8628 | 0.21406 | -4.0307 | 5.56E-05 | 0.00114  | 310.41  | 438.961 | 478.542 | 226.377 | 243.15  | 205.774 | Down |
| Gm15477  | 34.0321 | -1.0038 | 0.41425 | -2.4232 | 0.01538  | 0.08497  | 56.7943 | 43.4029 | 36.0612 | 18.3549 | 24.7272 | 24.852  | Down |
| Kctd8    | 359.586 | -0.6764 | 0.23498 | -2.8784 | 0.004    | 0.03169  | 539.546 | 404.436 | 383.029 | 235.554 | 353.392 | 241.561 | Down |
| Yipf7    | 16.5284 | -2.475  | 0.88835 | -2.7861 | 0.00533  | 0.03917  | 39.1685 | 6.90501 | 38.0105 | 4.07886 | 2.0606  | 8.94671 | Down |
| Corin    | 175.993 | -0.628  | 0.31372 | -2.0016 | 0.04532  | 0.17885  | 232.073 | 135.141 | 273.87  | 108.09  | 158.666 | 148.118 | Down |
| Tec      | 875.407 | 0.53888 | 0.13997 | 3.85007 | 0.00012  | 0.00213  | 656.073 | 808.872 | 676.391 | 1038.07 | 1113.75 | 959.286 | Up   |
| Ociad2   | 1537.98 | -0.818  | 0.24586 | -3.3271 | 0.00088  | 0.00988  | 1963.32 | 2525.26 | 1399.56 | 1162.47 | 854.117 | 1323.12 | Down |
| Sgcb     | 1972.45 | -0.3064 | 0.11932 | -2.5679 | 0.01023  | 0.06299  | 2270.79 | 1932.42 | 2340.08 | 1845.68 | 1760.78 | 1684.96 | Down |
| Spata18  | 1139.04 | -0.7514 | 0.35193 | -2.1351 | 0.03275  | 0.14384  | 1692.08 | 897.651 | 1697.8  | 770.904 | 491.452 | 1284.35 | Down |
| Lnx1     | 333.639 | -0.704  | 0.34296 | -2.0526 | 0.04011  | 0.1653   | 401.477 | 312.698 | 526.299 | 277.362 | 138.06  | 345.939 | Down |
| Gm6116   | 52.9703 | 1.65693 | 0.40439 | 4.09733 | 4.18E-05 | 0.0009   | 23.5011 | 31.5657 | 21.44   |         |         |         |      |

|          |         |         |         |         |          |          |         |         |         |         |         |         |      |
|----------|---------|---------|---------|---------|----------|----------|---------|---------|---------|---------|---------|---------|------|
| Sult1b1  | 29.3146 | -2.2163 | 1.11719 | -1.9839 | 0.04727  | 0.18417  | 106.734 | 1.97286 | 36.0612 | 9.17743 | 2.0606  | 19.8816 | Down |
| Sult1d1  | 1910.72 | -2.074  | 0.96098 | -2.1582 | 0.03091  | 0.13777  | 4621.88 | 985.443 | 3656.8  | 542.488 | 186.484 | 1471.24 | Down |
| Rufy3    | 1473.12 | 0.25218 | 0.0973  | 2.59187 | 0.00955  | 0.05972  | 1413    | 1333.65 | 1287.48 | 1637.66 | 1548.54 | 1618.36 | Up   |
| Dck      | 952.431 | 0.46243 | 0.10465 | 4.41868 | 9.93E-06 | 0.00028  | 754.973 | 829.587 | 818.687 | 1079.88 | 1124.06 | 1107.4  | Up   |
| Slc4a4   | 1393.81 | -0.581  | 0.182   | -3.1923 | 0.00141  | 0.01428  | 1731.25 | 1595.06 | 1686.11 | 964.65  | 961.268 | 1424.51 | Down |
| Alb      | 74.2416 | -0.9489 | 0.38159 | -2.4867 | 0.01289  | 0.07441  | 78.337  | 142.046 | 73.097  | 38.7492 | 53.5755 | 59.6447 | Down |
| Pbbp     | 732.929 | -0.7341 | 0.25914 | -2.833  | 0.00461  | 0.03526  | 633.551 | 882.855 | 1229.98 | 489.463 | 668.664 | 493.063 | Down |
| Cxcl3    | 190.934 | 2.56416 | 0.39591 | 6.47659 | 9.38E-11 | 1.01E-08 | 68.5449 | 58.1993 | 38.9851 | 253.909 | 206.06  | 519.903 | Up   |
| Cxcl1    | 401.589 | 1.50471 | 0.18606 | 8.08708 | 6.11E-16 | 1.96E-13 | 188.009 | 182.489 | 257.302 | 640.381 | 569.755 | 571.595 | Up   |
| Cxcl2    | 303.243 | 1.05235 | 0.39013 | 2.6974  | 0.00699  | 0.04746  | 100.859 | 311.712 | 179.331 | 428.28  | 509.998 | 289.277 | Up   |
| Epgn     | 25.9872 | 1.43002 | 0.50628 | 2.82455 | 0.00473  | 0.03591  | 10.7713 | 21.7015 | 9.74627 | 33.6506 | 43.2725 | 36.7809 | Up   |
| Ereg     | 104.682 | 0.96515 | 0.31553 | 3.0588  | 0.00222  | 0.02047  | 60.7112 | 76.9415 | 75.0463 | 129.504 | 186.484 | 99.4079 | Up   |
| Areg     | 2684.03 | -1.1896 | 0.14259 | -8.3427 | 7.26E-17 | 2.64E-14 | 3487.96 | 4352.13 | 3355.64 | 1535.69 | 1777.26 | 1595.5  | Down |
| Btc      | 414.788 | 0.30975 | 0.15453 | 2.00443 | 0.04502  | 0.17808  | 364.267 | 353.142 | 393.749 | 467.029 | 507.937 | 402.602 | Up   |
| Parm1    | 5528.44 | 1.55951 | 0.1764  | 8.8409  | 9.49E-19 | 4.38E-16 | 3277.43 | 2508.49 | 2616.87 | 8311.7  | 9732.2  | 6723.95 | Up   |
| Thap6    | 868.186 | 0.49782 | 0.13968 | 3.56387 | 0.00037  | 0.00505  | 758.89  | 738.836 | 661.772 | 1035.01 | 1119.93 | 894.671 | Up   |
| Ppef2    | 329.172 | -0.6096 | 0.1944  | -3.136  | 0.00171  | 0.01663  | 430.854 | 341.305 | 421.039 | 273.284 | 214.302 | 294.247 | Down |
| Naaa     | 8387.35 | 0.24661 | 0.1123  | 2.19602 | 0.02809  | 0.12915  | 8490.75 | 6846.81 | 7679.09 | 9201.91 | 9258.26 | 8847.3  | Up   |
| Scarb2   | 25258.6 | 0.20736 | 0.10113 | 2.05047 | 0.04032  | 0.16567  | 22253.6 | 25827.7 | 22258.5 | 26193.4 | 27411.1 | 27607.5 | Up   |
| Fam47e   | 2186.67 | -1.055  | 0.29931 | -3.5247 | 0.00042  | 0.00565  | 3395.91 | 1914.66 | 3546.67 | 1617.27 | 885.026 | 1760.51 | Down |
| Ccdc158  | 180.216 | -0.5849 | 0.28068 | -2.084  | 0.03716  | 0.15698  | 240.886 | 215.042 | 192.976 | 128.484 | 105.09  | 198.816 | Down |
| Cxcl13   | 667.186 | 0.87965 | 0.32753 | 2.68568 | 0.00724  | 0.04872  | 374.059 | 534.645 | 500.958 | 894.29  | 460.543 | 1238.62 | Up   |
| Gm7993   | 706.887 | -1.3037 | 0.31991 | -4.0753 | 4.59E-05 | 0.00097  | 1255.35 | 499.133 | 1264.09 | 402.787 | 391.513 | 428.448 | Down |
| Anxa3    | 26948.1 | 0.26996 | 0.12359 | 2.18435 | 0.02894  | 0.13187  | 22219.3 | 26798.3 | 24284.8 | 29389.2 | 32331.8 | 26665.2 | Up   |
| Cfap299  | 1438.37 | -1.0772 | 0.2756  | -3.9087 | 9.28E-05 | 0.00175  | 2349.13 | 1256.71 | 2249.44 | 1037.05 | 657.33  | 1080.56 | Down |
| Gm43251  | 18.2853 | -1.253  | 0.61999 | -2.021  | 0.04328  | 0.17352  | 24.4803 | 14.7964 | 38.0105 | 7.138   | 12.3636 | 12.923  | Down |
| Gm42133  | 21.8456 | -1.9258 | 0.61799 | -3.1162 | 0.00183  | 0.01748  | 37.2101 | 25.6472 | 40.9343 | 13.2563 | 3.0909  | 10.9349 | Down |
| Cds1     | 5979.46 | -0.646  | 0.13857 | -4.6621 | 3.13E-06 | 0.00011  | 8047.17 | 6455.2  | 7386.7  | 4422.5  | 4274.71 | 5290.49 | Down |
| Arhgap24 | 1385.54 | 0.28451 | 0.13505 | 2.1067  | 0.03514  | 0.15104  | 1120.22 | 1235.01 | 1392.74 | 1486.74 | 1664.96 | 1413.58 | Up   |
| Mapk10   | 85.9403 | -1.8987 | 0.60105 | -3.159  | 0.00158  | 0.01566  | 161.57  | 36.4979 | 208.57  | 33.6506 | 22.6666 | 52.6862 | Down |
| Aff1     | 6720.32 | 0.24029 | 0.08505 | 2.82541 | 0.00472  | 0.03585  | 6402.09 | 5982.7  | 6101.17 | 6996.26 | 7240.94 | 7598.74 | Up   |
| Hsd17b11 | 8996.81 | 0.52857 | 0.11641 | 4.54066 | 5.61E-06 | 0.00017  | 7610.44 | 7029.3  | 7460.77 | 10404.2 | 11908.2 | 9568.01 | Up   |
| Spp1     | 30258.3 | 2.08987 | 0.22498 | 9.28927 | 1.55E-20 | 9.80E-18 | 8838.37 | 9992.53 | 15703.2 | 52845.7 | 53038.7 | 41131   | Up   |
| Gm32051  | 12.2894 | -2.49   | 0.83341 | -2.9877 | 0.00281  | 0.02444  | 12.7298 | 13.81   | 36.0612 | 5.09857 | 2.0606  | 3.97631 | Down |
| Lrrc8b   | 4413.86 | 0.28088 | 0.139   | 2.02068 | 0.04331  | 0.17361  | 3827.74 | 4357.06 | 3771.81 | 4204.28 | 5535.79 | 4786.49 | Up   |
| Lrrc8c   | 7848.12 | 0.52209 | 0.17201 | 3.03533 | 0.0024   | 0.02172  | 6460.85 | 7676.4  | 5192.81 | 8454.46 | 10524.5 | 8779.7  | Up   |
| Zfp326   | 1839.06 | 0.21362 | 0.10491 | 2.03615 | 0.04174  | 0.16953  | 1710.68 | 1660.16 | 1738.74 | 1848.74 | 1931.81 | 2144.23 | Up   |
| Brdt     | 247.842 | -0.4529 | 0.16948 | -2.6726 | 0.00753  | 0.0501   | 305.514 | 261.404 | 292.388 | 189.667 | 217.393 | 220.685 | Down |
| Lpcat2b  | 27.9596 | -2.0589 | 0.52241 | -3.9412 | 8.11E-05 | 0.00156  | 27.418  | 55.2401 | 52.6299 | 13.2563 | 9.27269 | 9.94079 | Down |
| Gm42669  | 55.4033 | -1.0888 | 0.43044 | -2.5294 | 0.01143  | 0.06802  | 98.9005 | 44.3893 | 82.8433 | 25.4929 | 36.0604 | 44.7335 | Down |
| Mtf2     | 306.255 | 0.39908 | 0.17458 | 2.28599 | 0.02225  | 0.10965  | 262.429 | 234.77  | 295.312 | 312.033 | 349.271 | 383.714 | Up   |
| Tmed5    | 5315.09 | 0.37085 | 0.13317 | 2.78482 | 0.00536  | 0.03929  | 4537.67 | 5072.22 | 4297.13 | 559.88  | 6857.67 | 5545.96 | Up   |
| Gm42517  | 84.1759 | -0.8292 | 0.31281 | -2.6509 | 0.00803  | 0.05263  | 107.713 | 80.8872 | 134.499 | 63.2223 | 69.03   | 49.7039 | Down |
| Gm10419  | 229.32  | -1.6208 | 0.31654 | -5.1204 | 3.05E-07 | 1.48E-05 | 315.307 | 230.825 | 492.187 | 88.7152 | 123.636 | 125.254 | Down |
| Pde6b    | 85.7717 | -1.0062 | 0.33877 | -2.9703 | 0.00298  | 0.02553  | 128.277 | 77.9279 | 137.422 | 56.0843 | 45.3331 | 69.5855 | Down |
| Mfsd7a   | 535.477 | 0.85498 | 0.12168 | 7.02657 | 2.12E-12 | 3.23E-10 | 381.893 | 398.518 | 363.536 | 666.894 | 689.27  | 712.754 | Up   |
| Gak      | 6735.6  | 0.26033 | 0.09131 | 2.85099 | 0.00436  | 0.03379  | 6067.2  | 6269.75 | 6051.46 | 7412.31 | 7773.6  | 6839.26 | Up   |
| Dgkq     | 443.906 | 0.32062 | 0.15435 | 2.07724 | 0.03778  | 0.15871  | 395.602 | 349.196 | 439.557 | 509.857 | 452.301 | 516.921 | Up   |
| Gm20629  | 73.7951 | -1.2272 | 0.3916  | -3.1337 | 0.00173  | 0.01673  | 108.693 | 69.0501 | 132.549 | 30.5914 | 42.2422 | 59.6447 | Down |
| Vmn2r10  | 11.5006 | -2.0849 | 0.7131  | -2.9237 | 0.00346  | 0.02851  | 14.6882 | 19.7286 | 21.4418 | 3.05914 | 4.12119 | 5.96447 | Down |
| Vmn2r12  | 31.763  | -1.2819 | 0.51181 | -2.5047 | 0.01226  | 0.07166  | 39.1685 | 34.525  | 61.4015 | 16.3154 | 11.3333 | 27.8342 | Down |
| Crlf2    | 1339.48 | 0.46156 | 0.15807 | 2.91991 | 0.0035   | 0.02881  | 1015.44 | 1228.1  | 1137.39 | 1547.93 | 1795.81 | 1312.18 | Up   |
| A430073C | 217.387 | 0.317   | 0.1606  | 1.97389 | 0.04839  | 0.18691  | 231.094 | 225.892 | 268.023 | 299.796 | 314.241 | 289.277 | Up   |
| Zfp605   | 175.16  | 0.51745 | 0.21756 | 2.37846 | 0.01739  | 0.09323  | 120.443 | 150.924 | 160.814 | 214.14  | 227.696 | 176.946 | Up   |
| Chfr     | 643.851 | 0.42367 | 0.17314 | 2.44698 | 0.01441  | 0.08116  | 607.112 | 497.161 | 545.791 | 684.229 | 648.058 | 880.754 | Up   |
| Galnt9   | 55.6544 | -1.2548 | 0.37468 | -3.3491 | 0.00081  | 0.00931  | 81.2747 | 81.8737 | 72.1224 | 22.4337 | 47.3937 | 28.8283 | Down |
| Chek2    | 1110.44 | -0.828  | 0.2735  | -3.0274 | 0.00247  | 0.02218  | 1766.5  | 927.244 | 1568.18 | 893.27  | 576.967 | 930.458 | Down |
| Ttc28    | 1533.27 | -0.302  | 0.12723 | -2.3738 | 0.01761  | 0.09402  | 1792.94 | 1626.62 | 1659.79 | 1384.77 | 1521.75 | 1213.77 | Down |
| Mn1      | 231.254 | -0.54   | 0.17786 | -3.0362 | 0.0024   | 0.02168  | 301.598 | 243.648 | 276.794 | 197.825 | 193.696 | 173.964 | Down |
| Sez6l    | 79.7939 | -1.4314 | 0.64827 | -2.2081 | 0.02724  | 0.126    | 93.0252 | 162.761 | 93.5642 | 12.2366 | 24.722  | 42.4493 | Down |
| Sgsm1    | 917.034 | 0.43518 | 0.12669 | 3.43515 | 0.00059  | 0.00736  | 844.081 | 733.904 | 761.184 | 1101.29 | 1103.45 | 958.292 | Up   |
| Tmem119  | 1980.77 | 0.41489 | 0.17001 | 2.44037 | 0.01467  | 0.08218  | 1502.11 | 1872.24 | 1719.24 | 2466.69 | 2519.08 | 1805.25 | Up   |
| Selplg   | 2681.68 | 0.56369 | 0.16562 | 3.40352 | 0.00067  | 0.00802  | 2199.31 | 2571.62 | 1722.17 | 3027.53 | 3409.26 | 3160.18 | Up   |
| Coro1c   | 6059.84 | 0.52168 | 0.10966 | 4.75712 | 1.96E-06 | 7.08E-05 | 5070.36 | 5141.27 | 4716.22 | 6959.55 | 7883.84 | 6587.76 | Up   |
| Ssh1     | 3665.66 | 0.28595 | 0.11692 | 2.44572 | 0.01446  | 0.08138  | 2967.01 | 3617.24 | 3326.4  | 4000.34 | 4272.65 | 3810.3  | Up   |
| Dao      | 72.8342 | 2.57591 | 0.34555 | 7.45462 | 9.01E-14 | 1.79E-11 | 17.6258 | 25.6472 | 19.4925 | 134.602 | 143.211 | 96.4256 | Up   |
| Foxn4    | 142.213 | -0.9697 | 0.32793 | -2.9572 | 0.0031   | 0.02635  | 159.612 | 150.924 | 254.378 | 110.129 | 64.9088 | 113.325 | Down |
| Myo1h    | 731.273 | -1.4088 | 0.24282 | -5.8016 | 6.57E-09 | 5.03E-07 | 1044.82 | 751.659 | 1390.79 | 422.162 | 334.847 | 443.359 | Down |
| Fam222a  | 379.623 | -1.0088 | 0.17407 | -5.7955 | 6.81E-09 | 5.19E-07 | 563.047 | 453.758 | 504.857 | 275.323 | 215.332 | 265.419 | Down |
| Tchp     | 1040.41 | -0.3922 | 0.17442 | -2.2484 | 0.02455  | 0.11717  | 1242.62 | 994.321 | 1306    | 959.552 | 743.875 | 996.067 | Down |
| 1500011B | 642.725 | -0.3091 | 0.14159 | -2.1832 | 0.02902  | 0.13197  | 680.553 | 663.867 | 789.448 | 668.144 | 561.513 | 532.826 | Down |
| Oasl1    | 423.777 | -0.4249 | 0.18864 | -2.2526 | 0.02428  | 0.11641  | 421.061 | 505.052 | 531.172 | 411.965 | 294.665 | 378.744 | Down |
| Hnf1aos1 | 115.827 | -1.0621 | 0.42563 | -2.4952 | 0.01259  | 0.07305  | 118.485 | 134.154 | 217.342 | 79.5378 | 37.0907 | 108.355 | Down |
| Unc119b  | 4268.92 | -0.2649 | 0.11621 | -2.2798 | 0.02262  | 0.11066  | 5037.07 | 4332.4  | 4609.99 | 4199.19 | 3539.08 | 3895.79 | Down |
| Dynl1l   | 12085.2 | -0.2793 | 0.12167 | -2.2958 | 0.02169  | 0.10774  | 14930.1 | 11864.8 | 12959.6 | 11614.6 | 10720.3 | 10421.9 | Down |
| Gm13830  | 122.909 | -1.0176 | 0.26898 | -3.7832 | 0.00015  | 0.00262  | 158.632 | 148.951 | 186.154 | 75.4589 | 63.8785 | 104.378 | Down |
| Cit      | 428.485 | -0.683  | 0.22118 | -3.0881 | 0.00201  | 0.01889  | 515.0   |         |         |         |         |         |      |

|          |         |         |         |         |          |          |         |         |         |         |         |         |      |
|----------|---------|---------|---------|---------|----------|----------|---------|---------|---------|---------|---------|---------|------|
| Pebp1    | 8467.6  | -0.3727 | 0.1378  | -2.7046 | 0.00684  | 0.04679  | 9659.93 | 8206.11 | 10799.8 | 7868.12 | 6718.58 | 7553.01 | Down |
| Vsig10   | 1985.76 | 0.24929 | 0.10696 | 2.33064 | 0.01977  | 0.1014   | 1718.52 | 1736.12 | 1989.21 | 2101.63 | 2151.26 | 2217.79 | Up   |
| Wsb2     | 4640.46 | 0.23826 | 0.11846 | 2.0113  | 0.04429  | 0.17616  | 4290.91 | 4668.77 | 3814.69 | 5133.24 | 5267.92 | 4667.2  | Up   |
| Gm15728  | 273.934 | -0.6325 | 0.24417 | -2.5906 | 0.00958  | 0.05987  | 383.851 | 277.187 | 338.196 | 221.278 | 158.666 | 264.425 | Down |
| Tesc     | 148.094 | -1.0194 | 0.22326 | -4.5659 | 4.97E-06 | 0.00015  | 223.261 | 192.354 | 179.331 | 109.109 | 102     | 82.5085 | Down |
| Hrk      | 71.6743 | -1.9697 | 0.4285  | -4.5969 | 4.29E-06 | 0.00014  | 136.111 | 64.1179 | 142.296 | 34.6703 | 32.9696 | 19.8816 | Down |
| Tbx3os1  | 515.041 | -0.4027 | 0.1612  | -2.4983 | 0.01248  | 0.07258  | 585.569 | 615.532 | 558.461 | 392.59  | 415.21  | 522.885 | Down |
| Sdsl     | 74.6073 | -0.8486 | 0.39498 | -2.1485 | 0.03168  | 0.14016  | 74.4202 | 80.8872 | 132.549 | 62.2026 | 32.9696 | 64.6151 | Down |
| Slc8b1   | 1445.53 | 0.30319 | 0.14167 | 2.14015 | 0.03234  | 0.14246  | 1214.22 | 1274.47 | 1393.72 | 1576.48 | 1821.57 | 1392.7  | Up   |
| Rita1    | 450.911 | -0.4474 | 0.14367 | -3.1142 | 0.00184  | 0.01757  | 563.047 | 473.486 | 524.349 | 391.571 | 353.392 | 399.62  | Down |
| Cfap73   | 245.704 | -0.839  | 0.2848  | -2.9459 | 0.00322  | 0.027    | 364.267 | 204.191 | 377.181 | 184.568 | 143.211 | 200.804 | Down |
| Dtx1     | 950.242 | -1.1907 | 0.25529 | -4.6641 | 3.10E-06 | 0.0001   | 1328.79 | 939.081 | 1696.83 | 626.105 | 431.695 | 678.956 | Down |
| Oas1f    | 11.494  | -2.7012 | 0.90995 | -2.9686 | 0.00299  | 0.02565  | 14.6882 | 17.7557 | 27.2896 | 4.07886 | 5.15149 | 0       | Down |
| Oas1a    | 1648.91 | 0.25035 | 0.11741 | 2.13218 | 0.03299  | 0.14445  | 1385.59 | 1600.98 | 1532.11 | 1915.02 | 1650.54 | 1809.22 | Up   |
| Rph3a    | 12.8403 | 3.35755 | 0.9011  | 3.72604 | 0.00019  | 0.00312  | 1.95843 | 0       | 4.87314 | 25.4929 | 27.8181 | 16.8993 | Up   |
| Naa25    | 206.818 | 0.62663 | 0.21388 | 2.92975 | 0.00339  | 0.02814  | 187.03  | 129.222 | 171.534 | 227.396 | 250.363 | 275.36  | Up   |
| Aldh2    | 39496   | -0.2448 | 0.11666 | -2.0979 | 0.03591  | 0.15346  | 41498.1 | 40647.8 | 46368.9 | 39705.7 | 32614.1 | 36141.7 | Down |
| Acad12   | 849.551 | -0.3786 | 0.14715 | -2.5729 | 0.01009  | 0.06232  | 934.169 | 868.058 | 1078.91 | 817.811 | 669.694 | 728.66  | Down |
| Cux2     | 1258.96 | 0.56965 | 0.1487  | 3.83101 | 0.00013  | 0.00227  | 901.855 | 1191.61 | 947.338 | 1399.05 | 1595.93 | 1517.96 | Up   |
| Hvcn1    | 192.296 | 1.79463 | 0.34995 | 5.12823 | 2.92E-07 | 1.43E-05 | 95.9628 | 117.385 | 44.8329 | 279.402 | 363.695 | 252.496 | Up   |
| Fam216a  | 1505.64 | -0.6053 | 0.17107 | -3.5382 | 0.0004   | 0.00546  | 1856.59 | 1539.82 | 2054.51 | 1278.72 | 988.056 | 1316.16 | Down |
| Gpn3     | 2179.23 | 0.48098 | 0.11207 | 4.29161 | 1.77E-05 | 0.00045  | 1793.92 | 1891.97 | 1771.87 | 2671.65 | 2670.53 | 2275.45 | Up   |
| Arpc3    | 9923.84 | 0.33743 | 0.08863 | 3.80714 | 0.00014  | 0.00244  | 8999.94 | 8978.48 | 8327.22 | 11099.6 | 11584.7 | 10553.1 | Up   |
| Ift81    | 3264.1  | -0.5027 | 0.18808 | -2.6728 | 0.00752  | 0.05009  | 4159.7  | 3036.23 | 4285.44 | 2943.92 | 2178.05 | 2981.24 | Down |
| Gm10064  | 19.0596 | -1.5436 | 0.6713  | -2.2995 | 0.02148  | 0.10712  | 22.5219 | 25.6472 | 37.0358 | 7.138   | 4.12119 | 17.8934 | Down |
| P2rx4    | 7913.18 | 0.30464 | 0.10545 | 2.88882 | 0.00387  | 0.03099  | 7689.76 | 6808.34 | 6744.42 | 8711.42 | 8215.6  | 9309.55 | Up   |
| Camkk2   | 1654.9  | 0.42184 | 0.1515  | 2.78446 | 0.00536  | 0.0393   | 1358.17 | 1627.61 | 1258.24 | 1702.92 | 2126.54 | 1855.94 | Up   |
| Morn3    | 372.997 | -1.2022 | 0.26356 | -4.5613 | 5.08E-06 | 0.00016  | 644.322 | 374.843 | 540.918 | 231.475 | 172.06  | 274.366 | Down |
| Rhof     | 942.036 | 0.54964 | 0.23946 | 2.29531 | 0.02172  | 0.10783  | 592.424 | 1067.32 | 634.482 | 1006.46 | 1231.21 | 1120.33 | Up   |
| Psmd9    | 1835.38 | -0.2855 | 0.12663 | -2.2548 | 0.02415  | 0.11604  | 2106.29 | 1755.84 | 2187.06 | 1710.06 | 1566.05 | 1686.95 | Down |
| Wdr66    | 2544.45 | -0.7886 | 0.2841  | -2.7758 | 0.00551  | 0.04008  | 3712.2  | 2052.76 | 3904.36 | 1996.6  | 1279.63 | 2321.17 | Down |
| Bcl7a    | 1619.6  | -0.421  | 0.12762 | -3.2985 | 0.00097  | 0.01075  | 1730.27 | 1728.22 | 2104.22 | 1388.85 | 1314.66 | 1451.35 | Down |
| Lrrc43   | 773.049 | -0.9177 | 0.28284 | -3.2446 | 0.00118  | 0.01251  | 1139.8  | 683.596 | 1209.51 | 600.612 | 360.604 | 644.163 | Down |
| Gm15751  | 99.1436 | -0.9779 | 0.33327 | -2.9344 | 0.00334  | 0.02784  | 149.82  | 94.6972 | 150.093 | 71.38   | 46.3634 | 82.5085 | Down |
| Gm49027  | 59.8569 | -0.9364 | 0.42625 | -2.1969 | 0.02803  | 0.12893  | 64.628  | 63.1315 | 108.184 | 41.8083 | 24.7272 | 56.6625 | Down |
| Ccdc62   | 640.516 | -0.6586 | 0.22271 | -2.9572 | 0.0031   | 0.02635  | 696.22  | 706.284 | 950.262 | 562.883 | 366.786 | 560.66  | Down |
| Arl6ip4  | 2164.19 | -0.2312 | 0.10109 | -2.2873 | 0.02218  | 0.10938  | 2192.46 | 2334.88 | 2484.32 | 2069    | 1999.81 | 1904.65 | Down |
| Pitpnm2  | 8901.15 | -0.2169 | 0.08274 | -2.622  | 0.00874  | 0.05607  | 9531.66 | 9770.59 | 9405.15 | 7908.91 | 8669.96 | 8120.63 | Down |
| Cdk2ap1  | 2612.88 | -0.2408 | 0.08286 | -2.9057 | 0.00366  | 0.02986  | 2754.53 | 2842.89 | 2893.67 | 2382.05 | 2453.14 | 2351    | Down |
| Rilp1    | 1984.72 | -0.2489 | 0.09303 | -2.6757 | 0.00746  | 0.04975  | 2043.62 | 2200.72 | 2222.15 | 1867.1  | 1811.26 | 1763.5  | Down |
| Tctn2    | 2284.42 | -0.4812 | 0.21665 | -2.2213 | 0.02633  | 0.12343  | 2998.35 | 1899.86 | 3087.62 | 2082.26 | 1557.81 | 2080.61 | Down |
| Atp6v0a2 | 1904.24 | 0.2537  | 0.09276 | 2.73496 | 0.00624  | 0.04403  | 1800.77 | 1696.66 | 1714.37 | 2022.09 | 2021.45 | 2170.07 | Up   |
| Dnah10   | 4268.3  | -0.99   | 0.26784 | -3.6963 | 0.00022  | 0.00343  | 6934.78 | 3669.52 | 6429.62 | 3095.85 | 2055.45 | 3424.6  | Down |
| Ccdc92   | 1452.15 | -0.5111 | 0.18366 | -2.7829 | 0.00539  | 0.03944  | 1614.72 | 1443.15 | 2062.31 | 1359.28 | 1010.72 | 1222.72 | Down |
| Glt1d1   | 136.774 | -0.8911 | 0.36932 | -2.4129 | 0.01582  | 0.08678  | 156.674 | 197.286 | 179.331 | 64.242  | 69.03   | 154.082 | Down |
| Tmem132  | 422.546 | -0.8228 | 0.20499 | -4.0136 | 5.98E-05 | 0.00121  | 661.948 | 463.622 | 494.136 | 309.993 | 259.635 | 345.939 | Down |
| Gm6139   | 149.614 | -0.5563 | 0.214   | -2.5995 | 0.00934  | 0.05867  | 151.778 | 202.218 | 180.306 | 128.484 | 121.575 | 113.325 | Down |
| Zfp11    | 464.075 | -0.5442 | 0.16048 | -3.3908 | 0.0007   | 0.0083   | 545.422 | 506.038 | 600.37  | 389.531 | 325.574 | 417.513 | Down |
| Mrps17   | 4055.44 | -0.4422 | 0.14187 | -3.1167 | 0.00183  | 0.01746  | 5093.86 | 3965.45 | 4956.95 | 3636.3  | 3077.5  | 3602.54 | Down |
| Nipsnap2 | 5853.59 | -0.4883 | 0.14099 | -3.4637 | 0.00053  | 0.00677  | 7212.88 | 5863.34 | 7428.61 | 5086.34 | 4302.53 | 5227.86 | Down |
| Psph     | 718.567 | -0.2859 | 0.12523 | -2.2826 | 0.02245  | 0.11021  | 802.954 | 761.524 | 804.068 | 714.82  | 603.755 | 624.281 | Down |
| Phkg1    | 130.634 | -1.0077 | 0.39849 | -2.5287 | 0.01145  | 0.06807  | 223.261 | 83.8465 | 216.367 | 97.8926 | 67.9997 | 94.4375 | Down |
| Zbed5    | 308.116 | -0.7049 | 0.24098 | -2.925  | 0.00344  | 0.02845  | 468.064 | 271.268 | 406.42  | 262.067 | 212.241 | 228.638 | Down |
| Nupr1l   | 113.995 | -0.7989 | 0.25598 | -3.1208 | 0.0018   | 0.01728  | 125.339 | 164.734 | 144.245 | 100.952 | 73.1512 | 75.55   | Down |
| Vkorc11l | 3292.78 | 0.2631  | 0.09168 | 2.86976 | 0.00411  | 0.03225  | 3044.37 | 2939.56 | 2996    | 3488.44 | 3836.83 | 3451.44 | Up   |
| Gusb     | 5425.08 | 0.70947 | 0.10635 | 6.67132 | 2.54E-11 | 3.26E-09 | 4411.35 | 4196.27 | 3744.52 | 6529.23 | 7113.18 | 6555.95 | Up   |
| Castor2  | 1533.74 | -0.3389 | 0.12674 | -2.6736 | 0.0075   | 0.04999  | 1718.52 | 1509.24 | 1911.24 | 1375.6  | 1381.63 | 1306.22 | Down |
| Ncf1     | 350.704 | 1.58014 | 0.25518 | 6.19225 | 5.93E-10 | 5.45E-08 | 190.946 | 173.612 | 162.763 | 476.207 | 713.997 | 386.697 | Up   |
| Syna     | 39.3049 | -0.9336 | 0.3659  | -2.5517 | 0.01072  | 0.06512  | 47.0022 | 51.2943 | 56.5284 | 28.552  | 21.6363 | 30.8164 | Down |
| Rfc2     | 3443.37 | -0.4558 | 0.12527 | -3.6382 | 0.00027  | 0.00407  | 4173.4  | 3536.35 | 4238.65 | 3129.51 | 2645.81 | 2936.51 | Down |
| Eif4h    | 24748.9 | -0.2868 | 0.10469 | -2.7399 | 0.00615  | 0.04349  | 26553.3 | 29974.6 | 25075.2 | 22502   | 21443.6 | 22944.3 | Down |
| Limk1    | 1390.98 | -0.3154 | 0.13639 | -2.3128 | 0.02073  | 0.10478  | 1633.33 | 1560.53 | 1433.68 | 1200.2  | 1106.54 | 1411.59 | Down |
| Eln      | 4350.39 | -0.7877 | 0.32412 | -2.4304 | 0.01508  | 0.08371  | 6886.8  | 6798.47 | 2842.99 | 3359.96 | 3933.68 | 2280.42 | Down |
| Cldn4    | 1381.48 | 1.13263 | 0.24432 | 4.63578 | 3.56E-06 | 0.00012  | 789.245 | 654.989 | 1152.01 | 2314.75 | 1498.05 | 1879.8  | Up   |
| Bud23    | 1855.75 | -0.2094 | 0.08312 | -2.5194 | 0.01176  | 0.06954  | 2016.2  | 1983.71 | 1970.7  | 1709.04 | 1737.08 | 1717.77 | Down |
| Mxipl    | 144.412 | -1.4535 | 0.32026 | -4.5385 | 5.67E-06 | 0.00017  | 291.805 | 155.856 | 187.128 | 71.38   | 63.8785 | 96.4256 | Down |
| Hip1     | 4369.56 | 0.42545 | 0.17818 | 2.38772 | 0.01695  | 0.09143  | 3533    | 4479.38 | 3177.28 | 4749.83 | 5912.88 | 4365    | Up   |
| Ccl24    | 20.2752 | -1.64   | 0.70194 | -2.3364 | 0.01947  | 0.10033  | 50.9191 | 17.7557 | 23.3911 | 14.276  | 11.3333 | 3.97631 | Down |
| Gm43091  | 111.881 | -1.0632 | 0.39136 | -2.7167 | 0.00659  | 0.04571  | 169.404 | 87.7922 | 196.875 | 65.2618 | 52.5452 | 99.4079 | Down |
| Styx1l   | 381.695 | -1.1999 | 0.30709 | -3.9072 | 9.34E-05 | 0.00176  | 619.842 | 345.25  | 630.584 | 236.574 | 159.696 | 298.224 | Down |
| Mdh2     | 8887.46 | -0.2326 | 0.08864 | -2.6245 | 0.00868  | 0.05576  | 9861.65 | 9688.71 | 9257.01 | 8579.88 | 8240.33 | 7697.15 | Down |
| Hspb1    | 5234.49 | -0.3445 | 0.15057 | -2.2878 | 0.02215  | 0.10926  | 5684.33 | 5474.68 | 6410.12 | 5037.39 | 5027.86 | 3772.53 | Down |
| Zp3      | 11.9772 | -2.0288 | 0.76129 | -2.6649 | 0.0077   | 0.05096  | 21.5427 | 11.8372 | 24.3657 | 5.09857 | 2.0606  | 6.95855 | Down |
| Dtx2     | 1233.76 | -0.361  | 0.16025 | -2.2525 | 0.02429  | 0.11641  | 1474.69 | 1246.85 | 1440.5  | 1120.67 | 890.178 | 1229.68 | Down |
| Lrwd1    | 1853    | -0.5871 | 0.14872 | -3.9479 | 7.88E-05 | 0.00153  | 2245.33 | 1937.35 | 2492.12 | 1659.08 | 1320.84 | 1463.28 | Down |
| Sh2b2    | 321.555 | 1.04212 | 0.23529 | 4.42914 | 9.46E-06 | 0.00027  | 223.261 | 241.675 | 165.687 | 422.162 | 530.604 | 345.939 | Up   |
| Col26a1  | 128.535 | -1.6949 | 0.34454 | -4.9193 | 8.69E-07 | 3.54E-05 | 187.03  | 142.046 | 260.225 | 59.1435 | 42.2422 | 80.5204 | Down |
| Ift22    | 1995.6  |         |         |         |          |          |         |         |         |         |         |         |      |

|          |         |         |         |         |          |          |         |         |         |         |         |         |      |
|----------|---------|---------|---------|---------|----------|----------|---------|---------|---------|---------|---------|---------|------|
| Slc12a9  | 993.524 | 0.27852 | 0.12767 | 2.18166 | 0.02913  | 0.13237  | 859.749 | 864.112 | 969.754 | 1045.21 | 1203.39 | 1018.93 | Up   |
| Pcolce   | 7214.23 | -0.2181 | 0.09241 | -2.3599 | 0.01828  | 0.09622  | 7785.72 | 8055.18 | 7434.46 | 7076.82 | 6623.79 | 6309.42 | Down |
| Pilra    | 791.089 | 0.77788 | 0.2208  | 3.52307 | 0.00043  | 0.00567  | 512.128 | 784.212 | 452.227 | 939.157 | 1076.66 | 982.15  | Up   |
| Cyp3a13  | 658.312 | 0.69309 | 0.18277 | 3.79217 | 0.00015  | 0.00255  | 415.186 | 468.554 | 625.711 | 808.634 | 777.875 | 853.913 | Up   |
| Azgp1    | 324.317 | 0.67689 | 0.28455 | 2.37879 | 0.01737  | 0.09317  | 223.261 | 180.517 | 345.018 | 452.753 | 304.968 | 439.383 | Up   |
| Gm454    | 3.91227 | -5.3899 | 2.32712 | -2.3161 | 0.02055  | NA       | 17.6258 | 0       | 5.84776 | 0       | 0       | 0       | Down |
| Nxpe5    | 67.3874 | 1.13579 | 0.48585 | 2.33775 | 0.0194   | 0.10004  | 43.0854 | 48.3351 | 35.0866 | 65.2618 | 51.5149 | 161.041 | Up   |
| Fam20c   | 914.752 | 0.40455 | 0.17606 | 2.29779 | 0.02157  | 0.10738  | 677.615 | 823.669 | 860.596 | 1134.94 | 1146.72 | 844.967 | Up   |
| Dnaaf5   | 2421.66 | -0.574  | 0.16886 | -3.3995 | 0.00067  | 0.00809  | 3142.29 | 2342.77 | 3206.52 | 2098.57 | 1670.11 | 2069.67 | Down |
| Adap1    | 472.003 | 0.61497 | 0.20507 | 2.99884 | 0.00271  | 0.02379  | 315.307 | 426.138 | 377.181 | 602.652 | 660.421 | 450.318 | Up   |
| Zfand2a  | 2512.34 | 0.39981 | 0.10366 | 3.85672 | 0.00011  | 0.00208  | 2119.02 | 2303.31 | 2076.93 | 2745.07 | 3066.17 | 2763.54 | Up   |
| Micall2  | 770.628 | 0.36773 | 0.16324 | 2.25261 | 0.02428  | 0.11641  | 602.216 | 604.681 | 811.865 | 917.743 | 857.208 | 830.056 | Up   |
| Snx8     | 1558.03 | 0.45825 | 0.11402 | 4.01914 | 5.84E-05 | 0.00119  | 1188.76 | 1360.29 | 1388.84 | 1719.24 | 1894.72 | 1796.3  | Up   |
| lqce     | 2033.58 | -0.4004 | 0.18325 | -2.1848 | 0.02891  | 0.13181  | 2448.03 | 1778.53 | 2715.31 | 1827.33 | 1546.48 | 1885.77 | Down |
| Armz1    | 1127.34 | 0.95654 | 0.18967 | 5.0431  | 4.58E-07 | 2.07E-05 | 745.181 | 936.122 | 618.888 | 1420.46 | 1711.33 | 1332.07 | Up   |
| Card11   | 1130.51 | 0.89319 | 0.21817 | 4.09407 | 4.24E-05 | 0.00091  | 765.744 | 982.484 | 625.711 | 1438.82 | 1781.39 | 1188.92 | Up   |
| Sdk1     | 204.442 | 0.61292 | 0.19616 | 3.12451 | 0.00178  | 0.01713  | 146.882 | 150.924 | 187.128 | 274.303 | 231.817 | 235.597 | Up   |
| Ap5z1    | 1369.49 | 0.29644 | 0.12052 | 2.4596  | 0.01391  | 0.07888  | 1159.39 | 1317.87 | 1210.49 | 1521.41 | 1630.96 | 1376.8  | Up   |
| Tnrc18   | 3023.83 | 0.3075  | 0.08987 | 3.4217  | 0.00062  | 0.00765  | 2591    | 2679.14 | 2838.11 | 3335.49 | 3454.59 | 3244.67 | Up   |
| Actb     | 99624.7 | 0.2171  | 0.09813 | 2.21239 | 0.02694  | 0.12526  | 93653.9 | 92480.7 | 90294.3 | 106896  | 116239  | 98184.1 | Up   |
| Rnf216   | 2746.48 | 0.20905 | 0.10309 | 2.02784 | 0.04258  | 0.1716   | 2766.28 | 2381.24 | 2496.02 | 2837.87 | 2975.5  | 3022    | Up   |
| Daglb    | 903.773 | 0.39179 | 0.1374  | 2.85135 | 0.00435  | 0.03377  | 749.098 | 883.841 | 712.453 | 1066.62 | 1063.27 | 947.357 | Up   |
| Rac1     | 21525   | 0.22911 | 0.09695 | 2.36313 | 0.01812  | 0.09597  | 19747.8 | 20362.9 | 19347.3 | 23030.3 | 25155.8 | 21505.9 | Up   |
| Rsph10b  | 701.446 | -1.132  | 0.24341 | -4.6504 | 3.31E-06 | 0.00011  | 986.067 | 695.433 | 1208.54 | 491.503 | 341.029 | 486.104 | Down |
| 2900089D | 271.935 | 0.38278 | 0.19425 | 1.97049 | 0.04878  | 0.18785  | 206.614 | 212.082 | 289.464 | 309.993 | 314.241 | 299.218 | Up   |
| Smurf1   | 3372.8  | 0.26313 | 0.09624 | 2.73416 | 0.00625  | 0.04409  | 3033.6  | 3007.62 | 3156.82 | 3640.38 | 3942.95 | 3455.42 | Up   |
| Arpc1b   | 14257.1 | 0.72221 | 0.11465 | 6.29943 | 2.99E-10 | 2.94E-08 | 10641.1 | 11496.8 | 10145.9 | 17535   | 19587   | 16136.9 | Up   |
| Usp12    | 2793.19 | 0.26339 | 0.0999  | 2.63642 | 0.00838  | 0.05438  | 2607.64 | 2662.37 | 2346.9  | 2988.78 | 2972.41 | 3181.05 | Up   |
| Rasl11a  | 1452.92 | -0.929  | 0.27456 | -3.3837 | 0.00072  | 0.00843  | 2108.25 | 2464.1  | 1143.24 | 1023.79 | 1158.06 | 820.115 | Down |
| Katnal1  | 735.344 | -0.2792 | 0.1414  | -1.9747 | 0.04831  | 0.18675  | 792.183 | 741.795 | 884.962 | 663.834 | 599.634 | 729.654 | Down |
| Gm15406  | 10.5284 | -1.7869 | 0.78242 | -2.2838 | 0.02238  | 0.10996  | 7.8337  | 17.7557 | 23.3911 | 5.09857 | 4.12119 | 4.97039 | Down |
| Hmgb1    | 6540.61 | 0.26003 | 0.08801 | 2.95456 | 0.00313  | 0.0265   | 6132.81 | 5588.12 | 6137.23 | 7278.72 | 7205.91 | 6900.89 | Up   |
| Alox5ap  | 1084.76 | 0.77672 | 0.20256 | 3.8346  | 0.00013  | 0.00224  | 758.89  | 942.04  | 697.833 | 1316.45 | 1695.87 | 1097.46 | Up   |
| Hsph1    | 8778.79 | -0.7351 | 0.30139 | -2.4391 | 0.01472  | 0.08237  | 15212.1 | 7520.54 | 10172.2 | 6140.72 | 4478.71 | 9148.5  | Down |
| Gm20005  | 43.5964 | -1.4894 | 0.50051 | -2.9759 | 0.00292  | 0.02518  | 76.3786 | 48.3351 | 68.2239 | 28.552  | 9.27269 | 30.8164 | Down |
| B3glct   | 729.573 | 0.44839 | 0.17341 | 2.58565 | 0.00972  | 0.06049  | 502.336 | 652.03  | 696.859 | 847.383 | 928.299 | 750.529 | Up   |
| Gm42906  | 26.1208 | -1.1022 | 0.54338 | -2.0285 | 0.04251  | 0.17142  | 37.2101 | 41.43   | 28.2642 | 8.15772 | 25.7575 | 15.9053 | Down |
| Gm43196  | 98.797  | 0.59462 | 0.30009 | 1.98148 | 0.04754  | 0.18493  | 58.7528 | 85.8194 | 91.615  | 92.7941 | 123.636 | 140.165 | Up   |
| Gm20559  | 3178.53 | 0.41198 | 0.14945 | 2.75661 | 0.00584  | 0.04193  | 2197.35 | 3076.67 | 2909.26 | 3695.45 | 3627.68 | 3564.77 | Up   |
| Samd9l   | 6194.52 | 0.42231 | 0.11227 | 3.76159 | 0.00017  | 0.0028   | 4663.99 | 5706.5  | 5512.49 | 7107.41 | 6932.88 | 7243.85 | Up   |
| Pon1     | 6558.67 | -1.6427 | 0.73438 | -2.2368 | 0.0253   | 0.1197   | 7866.02 | 6388.12 | 15552.1 | 3759.69 | 947.875 | 4838.18 | Down |
| Gm44250  | 9872.66 | 0.26305 | 0.10277 | 2.55965 | 0.01048  | 0.06411  | 8522.09 | 9652.21 | 8751.18 | 10338.9 | 10390.6 | 11581   | Up   |
| Pon3     | 6010.75 | 0.24362 | 0.11718 | 2.07907 | 0.03761  | 0.15832  | 4912.71 | 5929.43 | 5671.36 | 6307.96 | 6218.88 | 7024.16 | Up   |
| Pon2     | 10261.6 | 0.25743 | 0.09895 | 2.60153 | 0.00928  | 0.05851  | 9110.6  | 9903.75 | 9030.9  | 10992.5 | 12011.2 | 10520.3 | Up   |
| Dync1i1  | 1722.03 | -0.808  | 0.34776 | -2.3234 | 0.02016  | 0.10275  | 2906.3  | 1255.72 | 2414.15 | 1374.58 | 724.3   | 1657.13 | Down |
| Slc25a13 | 894.279 | -0.3918 | 0.16564 | -2.3656 | 0.018    | 0.09552  | 998.797 | 852.275 | 1193.92 | 748.471 | 723.27  | 848.943 | Down |
| C1galt1  | 4485.58 | 0.44089 | 0.15425 | 2.85828 | 0.00426  | 0.03325  | 4113.67 | 3644.86 | 3657.78 | 4539.77 | 6240.52 | 4716.9  | Up   |
| Nxph1    | 29.6001 | 1.35199 | 0.5836  | 2.31661 | 0.02052  | 0.10413  | 14.6882 | 15.7829 | 19.4925 | 30.5914 | 74.1815 | 22.8638 | Up   |
| Tmem168  | 3412.15 | 0.2738  | 0.05111 | 2.87875 | 0.00399  | 0.03167  | 2948.41 | 3268.04 | 3051.56 | 3556.77 | 3892.47 | 3755.63 | Up   |
| 2610001J | 2961.82 | 0.23025 | 0.10123 | 2.27461 | 0.02293  | 0.11169  | 2616.46 | 2773.84 | 2787.43 | 3250.85 | 3395.86 | 2946.45 | Up   |
| Ppp1r3a  | 461.711 | 0.57772 | 0.25374 | 2.27681 | 0.0228   | 0.11126  | 278.096 | 323.549 | 509.73  | 622.026 | 566.664 | 470.199 | Up   |
| Tfec     | 833.529 | 1.10216 | 0.16985 | 6.48902 | 8.64E-11 | 9.49E-09 | 583.611 | 557.333 | 448.329 | 1102.31 | 1310.54 | 999.049 | Up   |
| Met      | 5399.91 | 0.81261 | 0.14631 | 5.55387 | 2.79E-08 | 1.79E-06 | 4085.28 | 4212.05 | 3457    | 6010.2  | 7919.9  | 6715    | Up   |
| Capza2   | 12135.7 | 0.35599 | 0.11053 | 3.22077 | 0.00128  | 0.01334  | 10587.2 | 11109.2 | 10241.4 | 13006.5 | 15207.2 | 12662.6 | Up   |
| Cftr     | 835.325 | -1.2154 | 0.2891  | -4.2041 | 2.62E-05 | 0.00061  | 1310.19 | 1412.57 | 780.676 | 444.596 | 375.029 | 688.896 | Down |
| Gm20186  | 43.0831 | 3.07538 | 1.0262  | 2.99687 | 0.00273  | 0.02389  | 1.95843 | 8.87787 | 16.5687 | 17.3352 | 198.848 | 14.9112 | Up   |
| Ptptrz1  | 729.418 | -0.9276 | 0.32086 | -2.8908 | 0.00384  | 0.03085  | 1174.08 | 530.699 | 1163.7  | 571.04  | 355.453 | 581.536 | Down |
| Aass     | 854.084 | 0.59768 | 0.19039 | 3.13917 | 0.00169  | 0.01651  | 581.652 | 589.885 | 867.418 | 1026.85 | 960.238 | 1098.46 | Up   |
| Cadps2   | 2441.93 | -0.3631 | 0.12112 | -2.9974 | 0.00272  | 0.02387  | 2851.47 | 2758.06 | 2633.44 | 2021.07 | 1970.96 | 2416.6  | Down |
| Iqub     | 1376.93 | -0.8765 | 0.34091 | -2.5446 | 0.01094  | 0.06599  | 2223.79 | 1052.52 | 2060.36 | 1088.04 | 560.482 | 1276.4  | Down |
| Lmod2    | 113.886 | -1.9581 | 0.70232 | -2.788  | 0.0053   | 0.03904  | 282.013 | 19.7286 | 241.708 | 41.8083 | 46.3634 | 51.6921 | Down |
| Gpr37    | 55.1832 | -4.8409 | 0.91403 | -5.2962 | 1.18E-07 | 6.41E-06 | 227.177 | 13.81   | 78.9448 | 2.03943 | 5.15149 | 3.97631 | Down |
| Lep      | 31.1957 | -5.4839 | 2.03777 | -2.6911 | 0.00712  | 0.04817  | 172.341 | 0.98643 | 9.74627 | 2.03943 | 2.0606  | 0       | Down |
| Rbm28    | 3140.18 | 0.23582 | 0.10525 | 2.24064 | 0.02505  | 0.11895  | 2725.15 | 3055.96 | 2871.25 | 3133.58 | 3566.89 | 3488.22 | Up   |
| Ccdc136  | 745.574 | 0.75299 | 0.1422  | 5.29521 | 1.19E-07 | 6.43E-06 | 547.38  | 627.369 | 491.212 | 878.994 | 989.087 | 939.404 | Up   |
| Tnpo3    | 2263.35 | 0.30576 | 0.10649 | 2.87138 | 0.00409  | 0.03214  | 2109.22 | 1980.75 | 1983.37 | 2444.26 | 2336.72 | 2725.76 | Up   |
| Cpa2     | 15.9579 | 2.2429  | 0.7949  | 2.8216  | 0.00478  | 0.03606  | 3.91685 | 10.8507 | 1.94925 | 13.2563 | 32.9696 | 32.8046 | Up   |
| Cpa5     | 7.59388 | 6.39689 | 1.4459  | 4.42416 | 9.68E-06 | NA       | 0       | 0       | 0       | 14.276  | 13.3939 | 17.8934 | Up   |
| Cep41    | 663.976 | -0.3986 | 0.13899 | -2.8679 | 0.00413  | 0.03237  | 844.081 | 680.636 | 740.717 | 573.08  | 541.937 | 603.406 | Down |
| Podxl    | 18160.8 | 0.41948 | 0.16575 | 2.53085 | 0.01138  | 0.06789  | 12734.7 | 17225   | 16657.4 | 17917.4 | 23871   | 20559.5 | Up   |
| Gm13849  | 58.761  | -1.0998 | 0.44098 | -2.4939 | 0.01263  | 0.0733   | 79.3162 | 97.6565 | 63.3508 | 38.7492 | 54.6058 | 18.8875 | Down |
| Plxna4   | 2514.65 | 0.72171 | 0.19638 | 3.67495 | 0.00024  | 0.00367  | 1837.98 | 2098.14 | 1759.2  | 2964.31 | 4002.71 | 2425.55 | Up   |
| Lrguk    | 1786.34 | -1.0989 | 0.31812 | -3.4545 | 0.00055  | 0.00694  | 2939.6  | 1630.57 | 2736.75 | 1130.86 | 674.845 | 1605.44 | Down |
| Akr1b8   | 4795.76 | 0.49922 | 0.13873 | 3.59861 | 0.00032  | 0.0046   | 3418.43 | 3943.75 | 4560.28 | 5527.87 | 6041.67 | 5282.53 | Up   |
| Akr1b10  | 1575.2  | 0.21838 | 0.10421 | 2.09556 | 0.03612  | 0.15417  | 1470.78 | 1396.78 | 1500.93 | 1644.8  | 1821.57 | 1616.37 | Up   |
| Agbl3    | 965.992 | -0.3989 | 0.16077 | -2.4814 | 0.01309  | 0.07538  | 1110.43 | 951.905 | 1233.88 | 789.259 | 754.178 | 956.304 | Down |
| Gm43748  | 68.9534 | -1.3241 | 0.43458 | -3.0469 | 0.00231  | 0.02111  | 104.776 | 74.9687 | 115.981 | 39.76   |         |         |      |

|           |         |         |         |         |          |          |         |         |         |         |         |         |      |
|-----------|---------|---------|---------|---------|----------|----------|---------|---------|---------|---------|---------|---------|------|
| Klrg2     | 368.175 | -0.539  | 0.22447 | -2.4011 | 0.01634  | 0.08901  | 427.916 | 374.843 | 505.832 | 305.914 | 228.726 | 365.821 | Down |
| Tbxas1    | 969.948 | 1.39472 | 0.20075 | 6.94742 | 3.72E-12 | 5.25E-10 | 531.713 | 624.41  | 447.354 | 1461.25 | 1650.54 | 1104.42 | Up   |
| Slc37a3   | 2892.36 | 0.21104 | 0.1058  | 1.99468 | 0.04608  | 0.18094  | 2751.59 | 2828.09 | 2463.86 | 3275.32 | 3088.83 | 2946.45 | Up   |
| Rab19     | 773.749 | 0.50826 | 0.15272 | 3.32815 | 0.00087  | 0.00987  | 579.694 | 696.419 | 640.33  | 923.862 | 1015.87 | 786.316 | Up   |
| Tmem178   | 69.3941 | -0.5585 | 0.28052 | -1.9908 | 0.04651  | 0.18206  | 95.9628 | 79.9008 | 72.1224 | 53.0252 | 57.6967 | 57.6566 | Down |
| Clec5a    | 568.867 | 2.05301 | 0.22516 | 9.11806 | 7.65E-20 | 4.26E-17 | 190.946 | 254.499 | 217.342 | 744.392 | 1186.9  | 819.121 | Up   |
| Mgam      | 104.031 | 1.05302 | 0.27358 | 3.84904 | 0.00012  | 0.00214  | 50.9191 | 85.8194 | 66.2747 | 148.878 | 139.09  | 133.207 | Up   |
| Prss2     | 4.36738 | 2.5103  | 1.27423 | 1.97006 | 0.04883  | NA       | 1.95843 | 0       | 1.94925 | 11.2169 | 4.12119 | 6.95855 | Up   |
| Trbc1     | 389.411 | -0.4015 | 0.17934 | -2.2388 | 0.02517  | 0.1193   | 380.914 | 533.658 | 415.191 | 331.407 | 348.241 | 327.052 | Down |
| Gstk1     | 2999.07 | -0.5015 | 0.12    | -4.1791 | 2.93E-05 | 0.00067  | 3274.49 | 3860.89 | 3410.22 | 2441.2  | 2303.75 | 2703.89 | Down |
| Casp2     | 2269.85 | 0.2011  | 0.09635 | 2.08723 | 0.03687  | 0.15632  | 1983.89 | 2218.48 | 2133.46 | 2363.7  | 2400.6  | 2518.99 | Up   |
| Tcaf1     | 2332.87 | 0.27475 | 0.12708 | 2.16199 | 0.03062  | 0.13704  | 2205.19 | 2236.24 | 1892.73 | 2397.35 | 2830.23 | 2435.49 | Up   |
| Cntnap2   | 74.5423 | 0.83299 | 0.27374 | 3.04296 | 0.00234  | 0.02131  | 55.8151 | 57.2129 | 47.7567 | 102.991 | 100.969 | 82.5085 | Up   |
| Zfp777    | 1554.9  | -0.3197 | 0.08939 | -3.5766 | 0.00035  | 0.00487  | 1748.87 | 1697.65 | 1732.89 | 1426.58 | 1375.45 | 1347.97 | Down |
| Sspo      | 372.669 | -0.7049 | 0.32051 | -2.1993 | 0.02786  | 0.12829  | 533.671 | 278.173 | 574.055 | 268.185 | 209.151 | 372.779 | Down |
| Zfp862-ps | 1613.17 | -2.1717 | 0.12733 | -17.056 | 3.14E-65 | 2.97E-61 | 2488.18 | 2813.3  | 2619.8  | 563.902 | 535.755 | 658.08  | Down |
| Atp6v0e2  | 2060.32 | -0.646  | 0.16661 | -3.8774 | 0.00011  | 0.00195  | 2708.5  | 2075.45 | 2758.2  | 1782.46 | 1368.24 | 1669.06 | Down |
| Rarres2   | 2922.01 | -0.302  | 0.11602 | -2.6028 | 0.00925  | 0.05837  | 3307.78 | 3022.42 | 3349.79 | 2873.56 | 2605.62 | 2372.87 | Down |
| Al854703  | 68.1951 | -0.9768 | 0.36115 | -2.7048 | 0.00684  | 0.04679  | 93.0252 | 76.9415 | 101.361 | 27.5323 | 55.6361 | 54.6743 | Down |
| Aoc1      | 3791.75 | -1.1268 | 0.26217 | -4.2978 | 1.72E-05 | 0.00043  | 4980.28 | 3657.68 | 6966.64 | 2945.96 | 1752.54 | 2447.42 | Down |
| Gpnmb     | 4673.63 | 1.92787 | 0.25378 | 7.59651 | 3.04E-14 | 6.85E-12 | 2320.73 | 2102.08 | 1413.21 | 6950.38 | 9847.59 | 5407.79 | Up   |
| Gm19253   | 9.78866 | 2.32118 | 0.8866  | 2.61808 | 0.00884  | 0.05652  | 1.95843 | 1.97286 | 5.84776 | 20.3943 | 20.606  | 7.95263 | Up   |
| Npy       | 25.3672 | -1.3166 | 0.54518 | -2.4149 | 0.01574  | 0.08644  | 35.2517 | 20.715  | 52.6299 | 11.2169 | 16.4848 | 15.9053 | Down |
| Osbpl3    | 2258.89 | 0.66578 | 0.25843 | 2.57622 | 0.00999  | 0.06186  | 2088.66 | 1021.94 | 2129.56 | 2713.46 | 2689.08 | 2910.66 | Up   |
| Snx10     | 2539.53 | 0.71295 | 0.13835 | 5.15338 | 2.56E-07 | 1.26E-05 | 1933.95 | 1821.94 | 2017.48 | 2914.35 | 3689.5  | 2859.96 | Up   |
| Kap2      | 6677.5  | 0.35419 | 0.10504 | 3.37195 | 0.00075  | 0.00872  | 5860.59 | 6389.1  | 5336.08 | 7339.91 | 7762.27 | 7377.06 | Up   |
| Jazf1     | 541.993 | -0.6463 | 0.21979 | -2.9405 | 0.00328  | 0.02741  | 681.532 | 543.523 | 759.235 | 477.227 | 315.271 | 475.17  | Down |
| Gm16499   | 36.1125 | -1.6457 | 0.63435 | -2.5943 | 0.00948  | 0.05938  | 46.023  | 23.6743 | 94.5388 | 15.2957 | 10.303  | 26.8401 | Down |
| 4921529L  | 2.69964 | 4.90474 | 2.05428 | 2.38757 | 0.01696  | NA       | 0       | 0       | 0       | 10.1971 | 1.0303  | 4.97039 | Up   |
| Scrn1     | 2123.74 | -0.7153 | 0.18608 | -3.8438 | 0.00012  | 0.00217  | 3149.15 | 1960.04 | 2809.85 | 1554.05 | 1579.45 | 1689.93 | Down |
| Plekha8   | 1305.56 | -0.5581 | 0.16284 | -2.1994 | 0.02785  | 0.12829  | 1581.43 | 1341.54 | 1477.53 | 1138    | 947.875 | 1346.98 | Down |
| Znrf2     | 4160.05 | 0.2171  | 0.09323 | 2.32872 | 0.01987  | 0.10187  | 3988.33 | 3761.26 | 3793.25 | 4212.44 | 4745.55 | 4459.44 | Up   |
| Mindy4    | 637.593 | -0.4594 | 0.14955 | -3.072  | 0.00213  | 0.01976  | 780.433 | 623.424 | 810.89  | 549.626 | 523.392 | 537.796 | Down |
| Vopp1     | 2142.54 | 0.31386 | 0.08566 | 3.66396 | 0.00025  | 0.00378  | 1937.86 | 1871.26 | 1921.97 | 2403.47 | 2426.35 | 2294.33 | Up   |
| Fam13a    | 3404.48 | -0.8864 | 0.30241 | -2.931  | 0.00338  | 0.02809  | 4288.95 | 2715.64 | 6251.26 | 2542.15 | 1681.45 | 2947.44 | Down |
| Tigd2     | 1433.51 | 0.36627 | 0.11034 | 3.31944 | 0.0009   | 0.0101   | 1218.14 | 1339.57 | 1199.77 | 1614.21 | 1714.42 | 1514.98 | Up   |
| A730020E  | 233.34  | -0.645  | 0.22794 | -2.8295 | 0.00466  | 0.03555  | 317.265 | 218.987 | 317.728 | 191.706 | 154.545 | 199.81  | Down |
| Ccser1    | 1612.01 | -0.4125 | 0.11996 | -3.4385 | 0.00058  | 0.0073   | 1945.7  | 1646.35 | 1930.74 | 1362.34 | 1316.72 | 1470.24 | Down |
| Grid2     | 43.9827 | -0.9145 | 0.45002 | -2.0322 | 0.04213  | 0.17057  | 51.8983 | 51.2943 | 69.1985 | 47.9266 | 23.6969 | 19.8816 | Down |
| Hpgds     | 424.142 | 0.70139 | 0.21483 | 3.26492 | 0.00109  | 0.01184  | 278.096 | 329.467 | 361.587 | 551.666 | 399.756 | 624.281 | Up   |
| Tnlp3     | 358.204 | 0.9212  | 0.19188 | 4.80101 | 1.58E-06 | 5.88E-05 | 198.78  | 250.553 | 293.363 | 511.897 | 451.271 | 443.359 | Up   |
| Gng12     | 6634.19 | 0.33521 | 0.07957 | 4.2127  | 2.52E-05 | 0.0006   | 5745.04 | 6065.56 | 5790.26 | 7430.66 | 7171.91 | 7601.72 | Up   |
| Igkv1-133 | 76.9738 | 5.13892 | 0.86679 | 5.92868 | 3.05E-09 | 2.48E-07 | 4.89606 | 4.93215 | 2.92388 | 124.405 | 17.5151 | 307.17  | Up   |
| Igkv17-12 | 66.3875 | 1.17044 | 0.33876 | 3.45507 | 0.00055  | 0.00693  | 37.2101 | 45.3758 | 39.9597 | 119.307 | 67.9997 | 88.473  | Up   |
| Igkv14-12 | 96.8183 | 2.72183 | 0.69359 | 3.92427 | 8.70E-05 | 0.00165  | 42.1061 | 20.715  | 13.6448 | 349.762 | 45.3331 | 109.349 | Up   |
| Igkv14-10 | 31.0785 | 2.30667 | 0.98495 | 2.34192 | 0.01918  | 0.09947  | 17.6258 | 5.91858 | 7.79702 | 25.4929 | 124.666 | 4.97039 | Up   |
| Igkv4-90  | 8.22237 | -2.3347 | 0.98093 | -2.3801 | 0.01731  | 0.09296  | 14.6882 | 11.8372 | 14.6194 | 5.09857 | 3.0909  | 0       | Down |
| Igkv12-89 | 239.998 | 4.3662  | 1.0779  | 4.05065 | 5.11E-05 | 0.00107  | 54.8359 | 4.93215 | 6.82239 | 399.728 | 720.179 | 253.49  | Up   |
| Igkv1-88  | 48.2018 | 1.71753 | 0.65907 | 2.60601 | 0.00916  | 0.05801  | 23.5011 | 5.91858 | 68.0105 | 69.3406 | 38.121  | 114.319 | Up   |
| Igkv4-79  | 120.464 | 5.69034 | 1.55939 | 3.64909 | 0.00026  | 0.00396  | 8.81291 | 3.94572 | 0.97463 | 75.4589 | 10.303  | 623.287 | Up   |
| Igkv4-70  | 66.5871 | 2.67876 | 0.81933 | 3.26945 | 0.00108  | 0.01169  | 27.418  | 20.715  | 5.84776 | 163.154 | 13.3939 | 168.993 | Up   |
| Igkv4-69  | 14.862  | 2.71725 | 1.20194 | 2.26071 | 0.02378  | 0.11467  | 5.87528 | 3.94572 | 1.94925 | 69.3406 | 3.0909  | 4.97039 | Up   |
| Igkv4-63  | 39.33   | 3.7194  | 1.06461 | 3.49367 | 0.00048  | 0.00622  | 5.87528 | 4.93215 | 5.84776 | 16.3154 | 6.18179 | 196.828 | Up   |
| Igkv5-43  | 45.4912 | 1.21376 | 0.60375 | 2.01037 | 0.04439  | 0.17629  | 42.1061 | 10.8507 | 29.2388 | 44.8675 | 106.121 | 39.7631 | Up   |
| Igkv7-33  | 4.71954 | -5.6608 | 1.90171 | -2.9767 | 0.00291  | NA       | 8.81291 | 0.98643 | 18.5179 | 0       | 0       | 0       | Down |
| Igkv8-30  | 583.046 | 3.16957 | 1.33374 | 2.37646 | 0.01748  | 0.09355  | 140.027 | 27.62   | 182.255 | 70.3603 | 547.088 | 2530.92 | Up   |
| Igkv6-25  | 136.027 | 2.89065 | 1.30744 | 2.21092 | 0.02704  | 0.12551  | 54.8359 | 19.7286 | 22.4164 | 25.4929 | 51.5149 | 642.175 | Up   |
| Igkv6-23  | 61.7174 | -0.8309 | 0.39244 | -2.1174 | 0.03423  | 0.14826  | 98.9005 | 55.2401 | 82.8433 | 36.7097 | 61.8179 | 34.7927 | Down |
| Igkv6-13  | 26.1653 | 2.11619 | 0.65198 | 3.2458  | 0.00117  | 0.01248  | 9.79213 | 10.8507 | 87.7165 | 64.242  | 48.424  | 14.9112 | Up   |
| Igkv3-7   | 73.4179 | -1.8083 | 0.88287 | -2.0482 | 0.04054  | 0.16615  | 242.845 | 32.5522 | 67.2493 | 76.4786 | 14.4242 | 6.95855 | Down |
| Igkv3-5   | 110.495 | 3.95409 | 0.76495 | 5.16908 | 2.35E-07 | 1.16E-05 | 19.5843 | 10.8507 | 9.74627 | 495.581 | 55.6361 | 71.5737 | Up   |
| Gm30211   | 563.925 | 0.65465 | 0.23976 | 2.73042 | 0.00633  | 0.04437  | 302.577 | 501.106 | 510.705 | 572.06  | 792.3   | 704.802 | Up   |
| Eif2ak3   | 2310.94 | 0.2303  | 0.09995 | 2.30426 | 0.02121  | 0.10646  | 2159.16 | 2231.3  | 1990.19 | 2625.77 | 2436.66 | 2422.57 | Up   |
| Thnsl2    | 1039.11 | -1.1613 | 0.21184 | -5.482  | 4.20E-08 | 2.57E-06 | 1465.88 | 1190.62 | 1651.99 | 643.44  | 490.422 | 792.281 | Down |
| Gm44172   | 2.03292 | 4.49493 | 2.05833 | 2.18377 | 0.02898  | NA       | 0       | 0       | 0       | 2.03943 | 6.18179 | 3.97631 | Up   |
| Capg      | 3897.66 | 1.00427 | 0.18861 | 5.32449 | 1.01E-07 | 5.60E-06 | 2514.62 | 2960.28 | 2304.99 | 5167.92 | 6372.4  | 4065.78 | Up   |
| Retsat    | 2151.4  | 0.37946 | 0.11933 | 3.17985 | 0.00147  | 0.0148   | 1970.18 | 1935.37 | 1704.62 | 2451.39 | 2621.08 | 2225.74 | Up   |
| Tgoln1    | 19100.8 | 0.82772 | 0.16325 | 5.07044 | 3.97E-07 | 1.84E-05 | 13703.1 | 15967.3 | 11630.2 | 23606.4 | 28265.2 | 21432.3 | Up   |
| Gm20560   | 25.9068 | -1.1777 | 0.43224 | -2.7246 | 0.00644  | 0.04488  | 33.2932 | 36.4979 | 38.0105 | 16.3154 | 14.4242 | 16.8993 | Down |
| Dnah6     | 5804.83 | -0.8164 | 0.27174 | -3.0046 | 0.00266  | 0.02344  | 8685.62 | 5160.01 | 8369.12 | 4441.88 | 2771.5  | 5400.83 | Down |
| Suclg1    | 6586.87 | -0.3639 | 0.11633 | -3.1279 | 0.00176  | 0.01698  | 7995.27 | 7592.55 | 6651.83 | 5779.74 | 5353.43 | 6148.38 | Down |
| Gm20383   | 44.5541 | -1.4492 | 0.57032 | -2.541  | 0.01105  | 0.06648  | 64.628  | 40.4436 | 90.6403 | 29.5717 | 8.24239 | 33.7987 | Down |
| Eva1a     | 646.345 | -0.8289 | 0.11706 | -7.0812 | 1.43E-12 | 2.29E-10 | 787.287 | 820.709 | 873.266 | 478.246 | 453.331 | 465.229 | Down |
| Tacr1     | 436.974 | -1.5345 | 0.6941  | -2.2108 | 0.02705  | 0.12552  | 1007.61 | 242.662 | 698.808 | 229.436 | 112.303 | 331.028 | Down |
| 2310069B  | 23.0325 | -1.4868 | 0.54755 | -2.7154 | 0.00662  | 0.04576  | 37.2101 | 31.5657 | 33.1373 | 8.15772 | 8.24239 | 19.8816 | Down |
| M1ap      | 332.593 | -1.0881 | 0.40155 | -2.7098 | 0.00673  | 0.04623  | 233.053 | 596.79  | 527.273 | 148.878 | 324.544 | 165.017 | Down |
| Wbp1      | 4134.21 | -0.2254 | 0.08848 | -2.5472 | 0.01086  | 0.06561  | 4518.09 | 45      |         |         |         |         |      |

|           |         |         |         |         |          |          |         |         |         |         |         |         |      |
|-----------|---------|---------|---------|---------|----------|----------|---------|---------|---------|---------|---------|---------|------|
| Paip2b    | 3832.96 | 0.21708 | 0.09106 | 2.38383 | 0.01713  | 0.09225  | 3460.54 | 3718.84 | 3456.03 | 4338.89 | 4022.29 | 4001.17 | Up   |
| Gm44127   | 52.3935 | -0.8019 | 0.34055 | -2.3546 | 0.01854  | 0.09728  | 75.3994 | 49.3215 | 75.0463 | 36.7097 | 38.121  | 39.7631 | Down |
| Spr-ps1   | 39.6409 | -1.1722 | 0.36678 | -3.1958 | 0.00139  | 0.0142   | 59.732  | 59.1858 | 45.8075 | 25.4929 | 25.7575 | 21.8697 | Down |
| Cct7      | 9871.37 | -0.2571 | 0.10748 | -2.3924 | 0.01674  | 0.09065  | 11979.7 | 10107.9 | 10158.5 | 9262.07 | 8780.2  | 8939.75 | Down |
| Nat8f7    | 82.358  | -0.8036 | 0.4     | -2.0091 | 0.04453  | 0.17657  | 74.4202 | 83.8465 | 155.94  | 49.966  | 49.4543 | 80.5204 | Down |
| Alms1-ps1 | 27.512  | 1.20302 | 0.55837 | 2.15453 | 0.0312   | 0.13856  | 23.5011 | 16.7693 | 9.74627 | 35.69   | 23.6969 | 55.6684 | Up   |
| Nat8f1    | 116.809 | -0.5941 | 0.22424 | -2.6494 | 0.00806  | 0.05282  | 140.027 | 148.951 | 132.549 | 102.991 | 95.8178 | 80.5204 | Down |
| Add2      | 12.0047 | -2.0268 | 0.71103 | -2.8505 | 0.00436  | 0.0338   | 19.5843 | 20.715  | 17.5433 | 2.03943 | 6.18179 | 5.96447 | Down |
| Pcyox1    | 5721.21 | 0.52672 | 0.12512 | 4.20981 | 2.56E-05 | 0.0006   | 4325.18 | 5306    | 4433.58 | 6683.21 | 7272.88 | 6306.43 | Up   |
| 2310040G  | 106.132 | -0.6041 | 0.26472 | -2.2821 | 0.02248  | 0.11025  | 112.609 | 125.277 | 146.194 | 104.011 | 73.1512 | 75.55   | Down |
| Gm43936   | 21.7913 | -1.3115 | 0.49885 | -2.629  | 0.00856  | 0.05526  | 29.3764 | 39.4572 | 24.3657 | 13.2563 | 12.3636 | 11.9289 | Down |
| 1600020E  | 966.999 | -0.3954 | 0.12035 | -3.2854 | 0.00102  | 0.01114  | 1077.13 | 1042.66 | 1176.38 | 854.521 | 767.572 | 883.736 | Down |
| Anxa4     | 16508.7 | 0.38815 | 0.08376 | 4.63426 | 3.58E-06 | 0.00012  | 13749.1 | 14773.8 | 14380.6 | 18959.6 | 19358.3 | 17830.8 | Up   |
| Gfpt1     | 8643.96 | 0.3781  | 0.11533 | 3.27844 | 0.00104  | 0.01137  | 8254.76 | 7629.05 | 6669.37 | 9291.64 | 9874.38 | 10144.6 | Up   |
| Arhgap25  | 1082.7  | 0.52973 | 0.18771 | 2.82211 | 0.00477  | 0.03605  | 845.061 | 1103.81 | 709.529 | 1317.47 | 1367.21 | 1153.13 | Up   |
| Prokr1    | 39.0335 | 1.27038 | 0.41842 | 3.03617 | 0.0024   | 0.02168  | 26.4387 | 23.6743 | 18.5179 | 39.7689 | 72.1209 | 53.6802 | Up   |
| 1810020C  | 507.212 | -0.9568 | 0.31706 | -3.0178 | 0.00255  | 0.02271  | 717.763 | 442.907 | 847.926 | 358.94  | 219.454 | 456.282 | Down |
| Gp9       | 142.789 | -1.6175 | 0.37155 | -4.3535 | 1.34E-05 | 0.00035  | 144.923 | 179.53  | 321.627 | 67.3012 | 90.6663 | 52.6862 | Down |
| Hmces     | 1610.39 | -0.2524 | 0.10979 | -2.299  | 0.02151  | 0.10714  | 1761.6  | 1635.5  | 1855.69 | 1521.41 | 1367.21 | 1520.94 | Down |
| H1f10     | 46.8282 | -1.2274 | 0.41306 | -2.9715 | 0.00296  | 0.02546  | 58.7528 | 61.1586 | 76.9956 | 38.7492 | 16.4848 | 28.8283 | Down |
| Gm5577    | 116.403 | -0.9664 | 0.37103 | -2.6046 | 0.0092   | 0.05817  | 121.422 | 122.317 | 218.317 | 71.38   | 55.6361 | 109.349 | Down |
| Rab7      | 1166.87 | 0.21132 | 0.09626 | 2.19533 | 0.02814  | 0.12925  | 1097.7  | 1053.51 | 1093.53 | 1274.64 | 1205.45 | 1276.4  | Up   |
| Gata2     | 4728.19 | -0.2753 | 0.13848 | -1.9879 | 0.04682  | 0.18302  | 5281.87 | 5015.99 | 5235.7  | 4851.8  | 4419.98 | 3563.77 | Down |
| Ruvbl1    | 2404.34 | -0.5307 | 0.18143 | -2.9252 | 0.00344  | 0.02844  | 3171.67 | 2342.77 | 3010.62 | 2105.71 | 1580.48 | 2214.81 | Down |
| Sec61a1   | 7824.09 | 0.24617 | 0.11808 | 2.08471 | 0.0371   | 0.15684  | 7841.54 | 7332.13 | 6300.97 | 8957.18 | 8175.42 | 8337.34 | Up   |
| Plxna1    | 608.595 | 0.94761 | 0.1809  | 5.23841 | 1.62E-07 | 8.44E-06 | 414.207 | 440.934 | 391.8   | 661.795 | 769.633 | 973.203 | Up   |
| Chchd6    | 1670.22 | -0.8392 | 0.1971  | -4.2576 | 2.07E-05 | 0.0005   | 2468.6  | 1604.92 | 2354.7  | 1283.82 | 1018.97 | 1290.31 | Down |
| Vmn1r42   | 37.4881 | 1.40252 | 0.41684 | 3.36467 | 0.00077  | 0.00891  | 18.605  | 20.715  | 22.4164 | 70.3603 | 39.1513 | 53.6802 | Up   |
| Cfap100   | 4109.59 | -0.8784 | 0.28876 | -3.0422 | 0.00235  | 0.02134  | 5809.67 | 3114.16 | 7046.56 | 3301.84 | 2159.51 | 3225.78 | Down |
| Klf15     | 2641.17 | -0.8258 | 0.32182 | -2.566  | 0.01029  | 0.06325  | 3773.89 | 1867.31 | 4490.11 | 2313.73 | 1278.6  | 2123.35 | Down |
| 1810044D  | 51.0454 | -0.8487 | 0.32544 | -2.6077 | 0.00911  | 0.05782  | 66.5865 | 64.1179 | 66.2747 | 33.6506 | 30.909  | 47.7335 | Down |
| Chchd4    | 1657.14 | -0.3178 | 0.09525 | -3.3364 | 0.00085  | 0.00966  | 1944.72 | 1787.41 | 1784.54 | 1492.86 | 1492.9  | 1440.42 | Down |
| Xpc       | 2020.61 | -0.2188 | 0.09314 | -2.349  | 0.01882  | 0.09813  | 2180.71 | 2270.76 | 2069.13 | 1925.22 | 1858.66 | 1819.16 | Down |
| Gm45218   | 45.932  | -1.2639 | 0.5321  | -2.3753 | 0.01753  | 0.09371  | 47.9814 | 33.5386 | 113.057 | 27.5323 | 22.6666 | 30.8164 | Down |
| Slc6a6    | 12462.3 | 0.48079 | 0.14125 | 3.40392 | 0.00066  | 0.00801  | 8923.57 | 10334.8 | 11955.8 | 14168.9 | 15863.5 | 13527.4 | Up   |
| Grip2     | 198.109 | 1.27607 | 0.27575 | 4.62767 | 3.70E-06 | 0.00012  | 110.651 | 155.856 | 80.8941 | 281.441 | 315.271 | 244.543 | Up   |
| 9530026P  | 950.391 | -0.3447 | 0.15538 | -2.2182 | 0.02654  | 0.12405  | 1035.03 | 1078.17 | 1076.96 | 679.13  | 932.42  | 900.635 | Down |
| Kbtbd8    | 275.046 | -0.718  | 0.29572 | -2.428  | 0.01518  | 0.08407  | 366.226 | 362.02  | 298.236 | 174.371 | 144.242 | 305.182 | Down |
| Tafa4     | 64.5261 | 1.17756 | 0.46335 | 2.54138 | 0.01104  | 0.06644  | 40.1477 | 47.3486 | 31.1881 | 147.859 | 65.9391 | 54.6743 | Up   |
| Eogt      | 5425.77 | 0.41943 | 0.08802 | 4.76512 | 1.89E-06 | 6.83E-05 | 4796.18 | 4567.17 | 4564.18 | 6344.67 | 6435.24 | 5847.17 | Up   |
| Tmf1      | 2719.59 | 0.21956 | 0.08868 | 2.47588 | 0.01329  | 0.07615  | 2627.23 | 2421.68 | 2490.17 | 2831.75 | 3000.23 | 2946.45 | Up   |
| Arl6ip5   | 7731.98 | 0.27159 | 0.10639 | 2.55289 | 0.01068  | 0.06502  | 6744.82 | 7635.95 | 6638.19 | 8436.1  | 8984.2  | 7952.63 | Up   |
| Gxylt2    | 150.488 | -0.6938 | 0.33228 | -2.0881 | 0.03679  | 0.15609  | 247.741 | 105.548 | 204.672 | 119.307 | 113.333 | 112.331 | Down |
| Crbn      | 722.029 | 0.3559  | 0.15894 | 2.23928 | 0.02514  | 0.11922  | 672.719 | 617.505 | 610.117 | 676.071 | 826.299 | 929.463 | Up   |
| Lrrn1     | 15.1537 | -1.8953 | 0.71548 | -2.6489 | 0.00807  | 0.05284  | 25.4595 | 33.5386 | 12.6702 | 3.05914 | 8.24239 | 7.95263 | Down |
| Sumf1     | 2938.71 | 0.27674 | 0.11337 | 2.44091 | 0.01465  | 0.08216  | 2465.66 | 2835    | 2672.43 | 3101.97 | 3514.35 | 3042.87 | Up   |
| Bhlhe40   | 7755.72 | 0.57331 | 0.22298 | 2.57113 | 0.01014  | 0.06255  | 5459.11 | 4615.5  | 8629.35 | 8959.22 | 9828.02 | 9043.13 | Up   |
| Edem1     | 5014.24 | 0.2732  | 0.08845 | 3.0889  | 0.00201  | 0.01885  | 4718.83 | 4607.61 | 4296.16 | 5438.14 | 5694.46 | 5330.25 | Up   |
| Lmcd1     | 722.902 | -0.6209 | 0.18256 | -3.4013 | 0.00067  | 0.00805  | 984.109 | 804.927 | 839.154 | 500.68  | 509.573 | 508.968 | Down |
| Srgap3    | 267.734 | -0.5283 | 0.2668  | -1.9801 | 0.04769  | 0.18528  | 300.618 | 240.689 | 407.394 | 220.258 | 171.03  | 266.413 | Down |
| Gt(ROSA)2 | 3020.87 | 1.24164 | 0.16072 | 7.72531 | 1.12E-14 | 2.67E-12 | 1993.68 | 1667.07 | 1726.06 | 4004.42 | 5090.7  | 3643.3  | Up   |
| Setd5     | 5540.08 | 0.21423 | 0.07409 | 2.89136 | 0.00384  | 0.03083  | 5128.14 | 5167.9  | 5092.43 | 6033.65 | 6016.94 | 5801.44 | Up   |
| Lhfp4     | 223.891 | -1.5527 | 0.29105 | -5.3347 | 9.57E-08 | 5.36E-06 | 340.766 | 280.146 | 381.079 | 105.031 | 77.2724 | 159.053 | Down |
| Ogg1      | 803.007 | -0.4692 | 0.15396 | -3.0477 | 0.00231  | 0.0211   | 952.774 | 783.225 | 1061.37 | 649.558 | 658.361 | 712.754 | Down |
| Camk1     | 3332.23 | 0.46867 | 0.13017 | 3.60028 | 0.00032  | 0.00457  | 2667.38 | 3055.96 | 2663.66 | 3927.94 | 4275.74 | 3402.73 | Up   |
| Arpc4     | 4515.71 | 0.32918 | 0.11081 | 2.97068 | 0.00297  | 0.02551  | 3966.79 | 4128.21 | 3913.13 | 5084.3  | 5497.67 | 4504.17 | Up   |
| Ttlf3     | 2354.13 | -0.5512 | 0.23322 | -2.3636 | 0.0181   | 0.09591  | 2918.05 | 2038.95 | 3438.49 | 2121.01 | 1436.24 | 2172.06 | Down |
| Gm44280   | 34.8128 | -0.9627 | 0.42052 | -2.2894 | 0.02206  | 0.10896  | 50.9191 | 35.5115 | 51.6552 | 23.4534 | 17.5151 | 29.8224 | Down |
| Ghrl      | 69.8324 | -2.2188 | 0.50131 | -4.426  | 9.60E-06 | 0.00027  | 64.628  | 127.249 | 153.016 | 40.7886 | 14.4242 | 18.8875 | Down |
| Slc6a1    | 53.3581 | 2.53825 | 0.39353 | 6.45003 | 1.12E-10 | 1.18E-08 | 20.5635 | 9.8643  | 16.5687 | 106.05  | 87.5754 | 79.5263 | Up   |
| Pparg     | 1004.38 | 0.64707 | 0.15177 | 4.26351 | 2.01E-05 | 0.00049  | 818.622 | 699.379 | 830.382 | 1187.97 | 1407.39 | 1082.55 | Up   |
| Mkrn2os   | 207.364 | 0.87777 | 0.3075  | 2.85456 | 0.00431  | 0.03351  | 176.258 | 82.8601 | 179.331 | 256.968 | 255.514 | 293.253 | Up   |
| Efcab12   | 929.158 | -0.8507 | 0.30455 | -2.7933 | 0.00522  | 0.03858  | 1253.39 | 790.13  | 1542.83 | 814.752 | 419.331 | 754.506 | Down |
| Ift122    | 1441.16 | -0.6068 | 0.18465 | -3.286  | 0.00102  | 0.01112  | 1857.57 | 1430.32 | 1931.71 | 1238.95 | 917.996 | 1270.43 | Down |
| Rho       | 69.3002 | -0.8933 | 0.39782 | -2.2455 | 0.02474  | 0.11779  | 120.443 | 66.0908 | 83.8179 | 46.9069 | 31.9393 | 66.6033 | Down |
| Tmcc1     | 2365.67 | 0.23786 | 0.119   | 1.99876 | 0.04563  | 0.1796   | 1962.34 | 2392.09 | 2158.8  | 2597.21 | 2682.9  | 2400.7  | Up   |
| 9530062K  | 91.0946 | -0.6718 | 0.30511 | -2.2018 | 0.02768  | 0.12773  | 105.755 | 83.8465 | 146.194 | 71.38   | 62.8482 | 76.544  | Down |
| Washc2    | 2661.79 | 0.23564 | 0.0835  | 2.82182 | 0.00478  | 0.03605  | 2363.82 | 2461.14 | 2509.67 | 2881.71 | 2932.23 | 2822.19 | Up   |
| Zfand4    | 697.733 | -0.7838 | 0.28188 | -2.7807 | 0.00542  | 0.03964  | 936.127 | 635.261 | 1076.96 | 509.857 | 348.241 | 679.95  | Down |
| Alox5     | 922.145 | 0.93457 | 0.24005 | 3.8932  | 9.89E-05 | 0.00185  | 642.364 | 801.967 | 456.126 | 1231.82 | 1439.33 | 961.274 | Up   |
| Zfp422    | 2824.09 | -0.2074 | 0.08284 | -2.5036 | 0.01229  | 0.07181  | 3008.14 | 2947.45 | 3124.66 | 2599.25 | 2585.02 | 2680.04 | Down |
| Rassf4    | 2462.34 | 0.61045 | 0.13779 | 4.43028 | 9.41E-06 | 0.00027  | 1811.54 | 2163.24 | 1872.26 | 2740.99 | 3388.65 | 2797.34 | Up   |
| Cxcl12    | 12334.6 | 0.49875 | 0.14143 | 3.52639 | 0.00042  | 0.00564  | 9487.59 | 12016.7 | 9166.37 | 13373.6 | 15608   | 14355.5 | Up   |
| Gm4640    | 30.145  | 1.5853  | 0.70214 | 2.25781 | 0.02396  | 0.11533  | 5.87528 | 29.5929 | 9.74627 | 34.6703 | 73.1512 | 27.8342 | Up   |
| Fxyd4     | 247.771 | -0.689  | 0.26857 | -2.5653 | 0.01031  | 0.06328  | 237.949 | 262.39  | 417.14  | 221.278 | 167.939 | 179.928 | Down |
| Gm4875    | 32.4543 | 0.97533 | 0.43534 | 2.24041 | 0.02506  | 0.11897  | 29.3764 | 15.7829 | 20.4672 | 42.828  | 50.4846 | 35.7868 | Up   |
| Rasgef1a  | 5579.82 | 0.43883 | 0.12676 | 3.46197 | 0.00054  | 0.006    |         |         |         |         |         |         |      |

|            |         |         |           |         |          |          |         |         |         |         |         |         |      |
|------------|---------|---------|-----------|---------|----------|----------|---------|---------|---------|---------|---------|---------|------|
| Bid        | 787.591 | 0.28147 | 0.14322   | 1.96527 | 0.04938  | 0.18935  | 634.53  | 683.596 | 814.788 | 871.856 | 905.632 | 815.144 | Up   |
| Tuba8      | 952.012 | 0.5453  | 0.18428   | 2.95915 | 0.00308  | 0.02625  | 713.846 | 776.32  | 832.332 | 1324.61 | 1195.15 | 869.819 | Up   |
| M6pr       | 15299.9 | 0.40758 | 0.08477   | 4.80781 | 1.53E-06 | 5.75E-05 | 13659   | 13057.4 | 12742.3 | 17444.3 | 18246.6 | 16649.8 | Up   |
| Apobec1    | 1504.06 | 0.79064 | 0.19785   | 4.39599 | 1.10E-05 | 0.0003   | 867.582 | 1365.22 | 1073.06 | 1806.93 | 1975.08 | 1936.46 | Up   |
| Gdf3       | 10.5364 | 2.44634 | 1.08905   | 2.2463  | 0.02468  | 0.11763  | 7.8337  | 1.97286 | 0       | 17.3352 | 8.24239 | 27.8342 | Up   |
| Slc2a3     | 433.31  | -0.6193 | 0.18164   | -3.4094 | 0.00065  | 0.0079   | 454.355 | 520.835 | 599.396 | 344.664 | 386.362 | 294.247 | Down |
| Gm5112     | 72.8393 | -0.6863 | 0.26684   | -2.5719 | 0.01011  | 0.06247  | 92.046  | 87.7922 | 89.6657 | 63.2223 | 54.6058 | 49.7039 | Down |
| C3ar1      | 490.642 | 0.99302 | 0.19898   | 4.99065 | 6.02E-07 | 2.64E-05 | 278.096 | 395.558 | 310.906 | 635.282 | 562.543 | 761.464 | Up   |
| Clec4a3    | 870.357 | 0.77582 | 0.18429   | 4.20983 | 2.56E-05 | 0.0006   | 610.05  | 788.157 | 527.273 | 1214.48 | 1091.09 | 991.096 | Up   |
| Clec4a2    | 473.29  | 0.68426 | 0.19007   | 3.60005 | 0.00032  | 0.00457  | 282.013 | 436.002 | 371.333 | 564.922 | 608.906 | 576.566 | Up   |
| Clec4n     | 1976.25 | 1.25899 | 0.15057   | 8.3616  | 6.19E-17 | 2.34E-14 | 1261.23 | 1245.86 | 987.297 | 2919.44 | 3000.23 | 2443.45 | Up   |
| Clec4d     | 402.492 | 1.31728 | 0.30703   | 4.2904  | 1.78E-05 | 0.00045  | 223.261 | 284.092 | 184.205 | 422.162 | 847.936 | 453.3   | Up   |
| Clec4e     | 575.475 | 1.01796 | 0.32168   | 3.1645  | 0.00155  | 0.01543  | 392.664 | 509.984 | 238.784 | 529.232 | 1040.6  | 741.583 | Up   |
| Clstn3     | 249.568 | -1.1787 | 0.33426   | -3.5262 | 0.00042  | 0.00564  | 391.685 | 231.811 | 415.191 | 162.135 | 94.7875 | 201.798 | Down |
| C1ra       | 4293.9  | 0.33831 | 0.15249   | 2.21859 | 0.02651  | 0.12395  | 3482.08 | 3642.88 | 4253.27 | 5357.58 | 3996.53 | 5031.03 | Up   |
| Gm15884    | 116.861 | -0.7337 | 0.28188   | -2.6029 | 0.00924  | 0.05837  | 183.113 | 116.399 | 138.397 | 75.4589 | 82.4239 | 105.372 | Down |
| Ptpn6      | 3087.58 | 0.40057 | 0.14854   | 2.69681 | 0.007    | 0.04751  | 2488.18 | 3002.69 | 2494.07 | 3339.57 | 4068.65 | 3132.34 | Up   |
| Eno2       | 369.035 | -1.171  | 0.24073   | -4.8644 | 1.15E-06 | 4.47E-05 | 576.756 | 355.115 | 601.345 | 255.948 | 214.302 | 210.745 | Down |
| Lrrc23     | 5357.14 | -1.2768 | 0.27725   | -4.6052 | 4.12E-06 | 0.00013  | 8873.63 | 5086.03 | 8793.09 | 3449.7  | 2058.54 | 3881.88 | Down |
| Pianp      | 35.9489 | 0.94952 | 0.44045   | 2.15581 | 0.0311   | 0.13833  | 18.605  | 34.525  | 20.4672 | 60.1632 | 40.1816 | 41.7513 | Up   |
| Acrbp      | 572.45  | -0.4153 | 0.15222   | -2.7283 | 0.00637  | 0.04454  | 620.821 | 660.908 | 681.264 | 439.497 | 462.604 | 569.607 | Down |
| Gapdh      | 2609.79 | 0.25171 | 0.11547   | 2.17992 | 0.02926  | 0.13281  | 2450.97 | 2297.39 | 2399.53 | 2874.58 | 3105.32 | 2530.92 | Up   |
| Vamp1      | 934.017 | 0.27354 | 0.13577   | 2.01468 | 0.04394  | 0.17523  | 777.495 | 935.135 | 824.535 | 962.611 | 1127.15 | 977.179 | Up   |
| Cd9        | 31236.4 | 0.44832 | 0.1493    | 3.00271 | 0.00268  | 0.02356  | 28421.7 | 25996.4 | 24847.1 | 36573.1 | 41870.3 | 29710   | Up   |
| Vwf        | 14002.2 | 0.30244 | 0.14081   | 2.14789 | 0.03172  | 0.14026  | 11677.1 | 14324.9 | 11617.6 | 17407.6 | 13867.8 | 15117.9 | Up   |
| Dyrk4      | 78.1906 | -1.3612 | 0.37689   | -3.6115 | 0.0003   | 0.00442  | 110.651 | 82.8601 | 144.245 | 46.9069 | 27.8181 | 56.6625 | Down |
| Ccnd2      | 3441.18 | 0.30909 | 0.13024   | 2.37325 | 0.01763  | 0.09413  | 3283.3  | 2866.56 | 3072.03 | 3283.48 | 4049.07 | 4092.62 | Up   |
| Tulp3      | 2470.63 | -0.6305 | 0.16301   | -3.8675 | 0.00011  | 0.00201  | 3119.77 | 2410.83 | 3475.52 | 1950.71 | 1780.36 | 2086.57 | Down |
| Fkbp4      | 11346.5 | -0.2447 | 0.11358   | -2.1544 | 0.03121  | 0.13858  | 13603.2 | 11825.3 | 11490.9 | 10474.5 | 9643.59 | 11041.2 | Down |
| Gm10069    | 323.155 | -0.58   | 0.22994   | -2.5223 | 0.01166  | 0.06907  | 440.646 | 325.522 | 395.699 | 269.205 | 194.726 | 313.135 | Down |
| Gm44009    | 83.2196 | 2.38224 | 0.47798   | 4.98402 | 6.23E-07 | 2.70E-05 | 40.1477 | 22.6879 | 17.5433 | 154.997 | 71.0906 | 192.851 | Up   |
| Gm44511    | 40.6705 | 0.84566 | 0.40538   | 2.08609 | 0.03697  | 0.15663  | 27.418  | 27.62   | 32.1627 | 52.0055 | 69.03   | 35.7868 | Up   |
| BC064078   | 1294.53 | -0.7185 | 0.26139   | -2.7487 | 0.00598  | 0.04264  | 1584.37 | 1233.04 | 2013.58 | 1098.23 | 1185.87 | 652.116 | Down |
| Gm47861    | 5.54991 | 5.945   | 1.57742   | 3.76881 | 0.00016  | NA       | 0       | 0       | 0       | 8.15772 | 8.24239 | 16.8993 | Up   |
| Clec12a    | 1539.43 | 0.37763 | 0.14303   | 2.64012 | 0.00829  | 0.05392  | 1141.76 | 1338.58 | 1536.99 | 1702.92 | 1676.3  | 1840.04 | Up   |
| Clec7a     | 7453.9  | 1.66355 | 0.29082   | 5.72031 | 1.06E-08 | 7.80E-07 | 3626.02 | 4661.87 | 2442.42 | 10063.6 | 15951.1 | 7978.47 | Up   |
| Olr1       | 1803.67 | 1.72082 | 0.21472   | 8.01417 | 1.11E-15 | 3.44E-13 | 765.744 | 1048.57 | 704.656 | 2350.44 | 3480.35 | 2472.27 | Up   |
| Klra11-ps  | 2.37639 | 3.65461 | 1.85048   | 1.97495 | 0.04827  | NA       | 0.97921 | 0       | 0       | 4.07886 | 7.21209 | 1.98816 | Up   |
| Klra3      | 234.264 | 2.10877 | 0.87898   | 2.39912 | 0.01643  | 0.0894   | 95.9628 | 77.9279 | 90.6403 | 308.974 | 764.481 | 67.5973 | Up   |
| Klra2      | 427.479 | 0.77578 | 0.22521   | 3.44468 | 0.00057  | 0.00716  | 283.972 | 410.355 | 251.454 | 463.97  | 565.634 | 589.489 | Up   |
| Etv6       | 2514.74 | 0.31117 | 0.11762   | 2.64558 | 0.00816  | 0.05324  | 2277.65 | 2307.26 | 2149.05 | 2640.04 | 2587.08 | 3127.37 | Up   |
| Bcl2l14    | 878.141 | 0.55109 | 0.16133   | 3.41597 | 0.00064  | 0.00776  | 578.715 | 748.7   | 809.915 | 1037.05 | 988.056 | 1106.41 | Up   |
| Hebp1      | 1347.62 | 0.73522 | 0.15908   | 4.62159 | 3.81E-06 | 0.00012  | 1006.63 | 1191.61 | 836.23  | 1642.76 | 1804.05 | 1604.44 | Up   |
| Gm36640    | 48.5243 | -0.8855 | 0.42583   | -2.0796 | 0.03756  | 0.15821  | 71.4825 | 40.4436 | 76.9956 | 40.7886 | 22.6666 | 38.7691 | Down |
| Dynl1t1-ps | 961.057 | -0.6465 | 0.18463   | -3.5014 | 0.00046  | 0.00606  | 1229.89 | 912.447 | 1376.17 | 826.989 | 687.209 | 733.63  | Down |
| Grln2b     | 6.57569 | -3.1121 | 1.35755   | -2.2925 | 0.02188  | NA       | 19.5843 | 13.81   | 1.94925 | 1.01971 | 3.0909  | 0       | Down |
| Gm43969    | 4.7622  | -2.5858 | 1.21001   | -2.137  | 0.0326   | NA       | 7.8337  | 5.91858 | 10.7209 | 2.03943 | 2.0606  | 0       | Down |
| BC049715   | 108.355 | -1.1533 | 0.36826   | -3.1316 | 0.00174  | 0.01681  | 166.466 | 102.589 | 179.331 | 74.4392 | 86.5451 | 40.7572 | Down |
| Pde6h      | 51.8649 | -1.2753 | 0.47977   | -2.6582 | 0.00785  | 0.05174  | 54.8359 | 59.1858 | 106.234 | 36.7097 | 15.4545 | 38.7691 | Down |
| Dera       | 1119.3  | 0.23265 | 0.1176    | 1.97838 | 0.04789  | 0.18583  | 933.19  | 1025.89 | 1128.62 | 1223.66 | 1209.57 | 1194.88 | Up   |
| Pik3c2g    | 484.512 | 2.35279 | 0.27541   | 8.5428  | 1.31E-17 | 5.51E-15 | 151.778 | 218.001 | 106.234 | 907.546 | 638.785 | 884.73  | Up   |
| Plekha5    | 2214.73 | -0.2541 | 0.11723   | -2.1673 | 0.03021  | 0.13576  | 2572.39 | 2167.19 | 2488.22 | 2106.73 | 1878.23 | 2075.64 | Down |
| Sloca1a4   | 7.04648 | -3.6934 | 1.24067   | -2.9769 | 0.00291  | NA       | 5.87528 | 20.715  | 12.6702 | 0       | 1.0303  | 1.98816 | Down |
| Gys2       | 4.91241 | -3.7532 | 1.84922   | -2.0296 | 0.04239  | NA       | 23.5011 | 2.95929 | 0.97463 | 2.03943 | 0       | 0       | Down |
| Ldhb       | 13964   | -0.9345 | 0.25286   | -3.6959 | 0.00022  | 0.00343  | 16348.9 | 15503.7 | 23152.3 | 12180.5 | 6310.58 | 10287.7 | Down |
| Gm31108    | 17.9089 | -2.1963 | 0.81554   | -2.693  | 0.00708  | 0.04791  | 58.7528 | 18.7422 | 10.7209 | 8.15772 | 4.12119 | 6.95855 | Down |
| Sox5       | 595.991 | -0.6225 | 0.16604   | -3.7493 | 0.00018  | 0.00291  | 807.851 | 607.641 | 752.412 | 499.66  | 418.301 | 490.081 | Down |
| Lrmp       | 631.34  | 0.41451 | 0.20617   | 2.01054 | 0.04437  | 0.17627  | 396.581 | 663.867 | 563.335 | 714.82  | 765.512 | 683.926 | Up   |
| Casc1      | 1408.1  | -1.0216 | 0.2982    | -3.426  | 0.00061  | 0.00755  | 2051.45 | 1227.12 | 2381.99 | 1093.13 | 593.452 | 1101.44 | Down |
| Lmntd1     | 314.167 | -1.1284 | 0.20351   | -5.5447 | 2.94E-08 | 1.88E-06 | 529.754 | 363.993 | 399.597 | 183.549 | 213.272 | 194.839 | Down |
| Tuba3b     | 2.76832 | -4.891  | 2.44718   | -1.9986 | 0.04565  | NA       | 8.81291 | 0       | 7.79702 | 0       | 0       | 0       | Down |
| Itpr2      | 2382.38 | 0.289   | 0.14481   | 1.99573 | 0.04596  | 0.18058  | 1940.8  | 2280.63 | 2212.4  | 2538.07 | 2292.41 | 3029.95 | Up   |
| Med21      | 1802.17 | -0.2509 | 0.09732   | -2.5782 | 0.00993  | 0.06155  | 2018.16 | 1929.46 | 1927.81 | 1753.91 | 1602.11 | 1581.58 | Down |
| Mrps35     | 1251.73 | -0.2083 | 0.10213   | -2.04   | 0.04135  | 0.16842  | 1345.44 | 1308.99 | 1371.3  | 1220.6  | 1174.54 | 1089.51 | Down |
| Klhl42     | 1344.72 | -0.416  | 0.10994   | -3.7842 | 0.00015  | 0.00262  | 1497.22 | 1437.23 | 1677.33 | 1174.71 | 1143.63 | 1138.22 | Down |
| Gm15762    | 9.55792 | 4.82428 | 1.48617   | 3.24612 | 0.00117  | 0.01248  | 0       | 0       | 1.94925 | 24.4732 | 3.0909  | 27.8342 | Up   |
| Ergic2     | 1362.77 | 0.26572 | 0.13264   | 2.00331 | 0.04514  | 0.17836  | 1275.91 | 1268.55 | 1168.58 | 1350.1  | 1414.6  | 1698.88 | Up   |
| Caprin2    | 384.537 | -0.3559 | 0.16327   | -2.1798 | 0.02927  | 0.13281  | 454.355 | 393.585 | 447.354 | 313.052 | 312.18  | 386.697 | Down |
| Amm1       | 1565.45 | -0.3281 | 0.09542   | -3.4382 | 0.00059  | 0.0073   | 1771.4  | 1688.77 | 1767.97 | 1416.38 | 1316.72 | 1431.47 | Down |
| Bicd1      | 488.104 | -0.3457 | 0.16182   | -2.1363 | 0.03266  | 0.14348  | 523.879 | 502.093 | 613.041 | 398.709 | 401.816 | 489.087 | Down |
| AU018091   | 40.8577 | 1.3608  | 0.45164   | 3.01303 | 0.00259  | 0.023    | 14.6882 | 36.4979 | 17.5433 | 62.2026 | 53.5755 | 60.6388 | Up   |
| Leng1      | 640.689 | 0.24599 | 0.1191    | 2.06535 | 0.03889  | 0.16209  | 604.174 | 613.559 | 540.918 | 704.623 | 681.027 | 699.831 | Up   |
| Tmc4       | 5732.6  | 0.65146 | 0.12939   | 5.03493 | 4.78E-07 | 2.15E-05 | 4862.77 | 3785.92 | 4730.84 | 7020.74 | 6693.85 | 7301.51 | Up   |
| Pirb       | 2314.77 | 1.06794 | 0.18646   | 5.72751 | 1.02E-08 | 7.50E-07 | 1469.8  | 1797.27 | 1218.28 | 2806.26 | 3713.2  | 2883.82 | Up   |
| Gm15922    | 49.4001 | 2.59207 | 0.40756   | 6.35998 | 2.02E-10 | 2.07E-08 | 15.6674 | 14.7964 | 11.6955 | 73.4195 | 110.242 | 70.5796 | Up   |
| Gm15448    | 41.5904 | 1.20338 | 0.44065   | 2.7309  | 0.00632  | 0.04434  | 16.6466 | 35.5115 | 23.3911 | 64.242  | 67.9997 | 41.7513 | Up   |
| Pira2      | 38.5026 | 1.33318 | 0.43561   | 3.06046 | 0.00221  | 0.0204   | 32.314  | 14.7964 | 18.5179 | 46.9069 | 61.8179 | 56.6625 | Up   |
| Gm14548    | 31.0964 | 0.94649 | 0.40269</ |         |          |          |         |         |         |         |         |         |      |

|           |         |         |         |         |          |          |         |         |         |         |         |         |      |
|-----------|---------|---------|---------|---------|----------|----------|---------|---------|---------|---------|---------|---------|------|
| Syt5      | 2368.44 | -1.0668 | 0.26111 | -4.0857 | 4.39E-05 | 0.00094  | 3517.33 | 2155.35 | 3946.27 | 1606.05 | 1114.78 | 1870.86 | Down |
| Hspbp1    | 1920.5  | -0.3184 | 0.11544 | -2.7578 | 0.00582  | 0.04183  | 2267.86 | 1957.08 | 2169.52 | 1747.79 | 1806.11 | 1574.62 | Down |
| Tmem150   | 112.487 | 1.16661 | 0.31517 | 3.70159 | 0.00021  | 0.00337  | 72.4617 | 85.8194 | 49.706  | 149.898 | 195.757 | 121.278 | Up   |
| Fam71e2   | 13.3494 | -1.6586 | 0.65782 | -2.5214 | 0.01169  | 0.06922  | 14.6882 | 28.6065 | 17.5433 | 6.11829 | 6.18179 | 6.95855 | Down |
| Isoc2a    | 1240.48 | 0.39912 | 0.17707 | 2.25397 | 0.0242   | 0.11619  | 957.67  | 1292.22 | 960.008 | 1399.05 | 1607.27 | 1226.69 | Up   |
| Nat14     | 250.118 | -0.7676 | 0.20126 | -3.8143 | 0.00014  | 0.00239  | 369.163 | 269.295 | 307.008 | 169.273 | 177.211 | 208.756 | Down |
| Sbk3      | 159.184 | -1.4529 | 0.6455  | -2.2508 | 0.0244   | 0.11677  | 281.034 | 36.4979 | 382.054 | 70.3603 | 63.8785 | 121.278 | Down |
| Epp13     | 61.3277 | -2.1244 | 0.52736 | -4.0285 | 5.61E-05 | 0.00115  | 118.485 | 49.3215 | 131.575 | 23.4534 | 11.3333 | 33.7987 | Down |
| Zfp446    | 690.218 | -0.2358 | 0.11824 | -1.9945 | 0.0461   | 0.18095  | 800.017 | 733.904 | 705.63  | 651.598 | 610.967 | 639.192 | Down |
| Mzf1      | 174.089 | -0.7767 | 0.23995 | -3.2369 | 0.00121  | 0.01279  | 245.782 | 213.069 | 200.773 | 150.918 | 95.8178 | 138.177 | Down |
| Nlrp5-ps  | 68.3043 | 0.80789 | 0.33256 | 2.42929 | 0.01513  | 0.08391  | 34.2724 | 57.2129 | 57.503  | 73.4195 | 99.9389 | 87.4789 | Up   |
| Zfp541    | 3.7025  | 3.36527 | 1.55123 | 2.16942 | 0.03005  | NA       | 0       | 1.97286 | 0       | 7.138   | 5.15149 | 7.95263 | Up   |
| Meis3     | 818.657 | 0.42921 | 0.13599 | 3.15613 | 0.0016   | 0.01577  | 669.782 | 687.541 | 735.844 | 1007.48 | 992.177 | 819.121 | Up   |
| C5ar2     | 61.3805 | 0.88329 | 0.42654 | 2.07084 | 0.03837  | 0.16044  | 48.9606 | 52.2808 | 28.2642 | 47.9266 | 84.4845 | 106.366 | Up   |
| Inafm1    | 1168.27 | -0.2535 | 0.12579 | -2.0151 | 0.04389  | 0.1751   | 1194.64 | 1241.91 | 1375.2  | 1057.44 | 1164.24 | 976.185 | Down |
| Bbc3      | 1024.74 | -0.5688 | 0.11311 | -5.0289 | 4.93E-07 | 2.20E-05 | 1300.39 | 1127.49 | 1244.6  | 852.482 | 824.239 | 799.239 | Down |
| Ptgir     | 386.135 | 1.85607 | 0.28615 | 6.48626 | 8.80E-11 | 9.57E-09 | 150.799 | 227.865 | 122.803 | 610.809 | 755.209 | 449.323 | Up   |
| Qpctl     | 901.153 | 0.30092 | 0.10194 | 2.95202 | 0.00316  | 0.02666  | 800.017 | 799.994 | 822.585 | 998.301 | 957.147 | 1028.87 | Up   |
| Eml2      | 6364.45 | -0.3403 | 0.13435 | -2.5327 | 0.01132  | 0.06768  | 7735.78 | 6014.26 | 7584.55 | 5961.25 | 5251.43 | 5639.41 | Down |
| Ckm       | 170.153 | -3.1389 | 1.35134 | -2.3228 | 0.02019  | 0.10288  | 515.066 | 20.715  | 381.079 | 15.2957 | 8.24239 | 80.5204 | Down |
| Exoc3l2   | 193.431 | 0.46809 | 0.23045 | 2.03118 | 0.04224  | 0.17074  | 125.339 | 165.72  | 195.9   | 249.83  | 207.09  | 216.709 | Up   |
| Relb      | 1759.11 | 0.37637 | 0.16095 | 2.33845 | 0.01936  | 0.09988  | 1549.11 | 1792.34 | 1251.42 | 1827.33 | 2122.41 | 2012.01 | Up   |
| Cblc      | 1607.14 | 0.82401 | 0.15651 | 5.26498 | 1.40E-07 | 7.45E-06 | 1236.75 | 1166.95 | 1076.96 | 2282.12 | 2209.99 | 1670.05 | Up   |
| Nlrp4e    | 90.3711 | -1.0074 | 0.4036  | -2.496  | 0.01256  | 0.07296  | 133.173 | 158.815 | 70.1732 | 69.3406 | 39.1513 | 71.5737 | Down |
| Lypd5     | 67.434  | -0.9319 | 0.34211 | -2.7241 | 0.00645  | 0.04491  | 70.5033 | 80.8872 | 114.031 | 57.104  | 44.3028 | 37.775  | Down |
| Kcnn4     | 417.45  | -0.5692 | 0.20944 | -2.7177 | 0.00657  | 0.04559  | 513.107 | 386.68  | 596.472 | 364.038 | 289.514 | 354.886 | Down |
| Plaur     | 3844.38 | 0.64504 | 0.17975 | 3.58848 | 0.00033  | 0.00473  | 3508.52 | 3035.24 | 2453.14 | 4853.84 | 5328.7  | 3886.85 | Up   |
| AC161166  | 14.707  | -1.1472 | 0.58341 | -1.9664 | 0.04925  | 0.18906  | 23.5011 | 19.7286 | 17.5433 | 9.17743 | 11.3333 | 6.95855 | Down |
| Ceacam1C  | 620.059 | 2.50116 | 1.15449 | 2.16645 | 0.03028  | 0.13596  | 307.473 | 45.3758 | 205.646 | 1129.84 | 116.424 | 1915.59 | Up   |
| 4732471JC | 303.112 | 0.56113 | 0.17967 | 3.12311 | 0.00179  | 0.01719  | 224.24  | 221.947 | 288.49  | 332.427 | 368.847 | 382.72  | Up   |
| B3gnt8    | 275.089 | 0.71644 | 0.21656 | 3.30835 | 0.00094  | 0.01045  | 185.071 | 223.92  | 215.393 | 333.447 | 419.331 | 273.372 | Up   |
| Tmem91    | 28.7265 | -1.1834 | 0.51119 | -2.315  | 0.02062  | 0.10443  | 44.0646 | 48.3351 | 27.2896 | 24.4732 | 10.303  | 17.8934 | Down |
| B9d2      | 819.192 | -0.3836 | 0.15751 | -2.4352 | 0.01489  | 0.08302  | 936.127 | 826.628 | 1019.46 | 803.535 | 716.057 | 613.346 | Down |
| Tgfb1     | 3772.5  | 0.466   | 0.18933 | 2.46137 | 0.01384  | 0.07863  | 2926.87 | 3806.63 | 2771.84 | 4184.91 | 5316.34 | 3628.39 | Up   |
| Axl       | 6545.68 | 0.99747 | 0.16559 | 6.02391 | 1.70E-09 | 1.45E-07 | 4117.59 | 5052.49 | 3936.52 | 8101.63 | 10418.4 | 7647.45 | Up   |
| Gm29763   | 32.4854 | -1.2494 | 0.41413 | -3.0169 | 0.00255  | 0.02277  | 39.1685 | 51.2943 | 46.7821 | 18.3549 | 15.4545 | 23.8579 | Down |
| Cyp2s1    | 15906.4 | -0.7922 | 0.24602 | -3.2201 | 0.00128  | 0.01336  | 20808.3 | 15615.2 | 24078.2 | 14098.6 | 7729.3  | 13108.9 | Down |
| Gm30146   | 27.1169 | -2.0625 | 0.50012 | -4.1239 | 3.72E-05 | 0.00082  | 45.0438 | 39.4572 | 46.7821 | 15.2957 | 6.18179 | 9.94079 | Down |
| Cyp2b19   | 125.528 | -1.2823 | 0.36751 | -3.489  | 0.00048  | 0.0063   | 214.448 | 135.141 | 184.205 | 90.7546 | 39.1513 | 89.4671 | Down |
| Cyp2g1    | 46.8781 | -1.6249 | 0.45313 | -3.586  | 0.00034  | 0.00476  | 93.0252 | 41.43   | 77.9702 | 26.5126 | 16.4848 | 25.846  | Down |
| Cyp2f2    | 74984.2 | -0.6593 | 0.26231 | -2.5134 | 0.01196  | 0.07039  | 84666.7 | 67459.9 | 123349  | 68649.2 | 40145.6 | 65635   | Down |
| Numbl     | 947.76  | -0.2951 | 0.14589 | -2.023  | 0.04307  | 0.17298  | 963.545 | 969.66  | 1199.77 | 905.507 | 873.693 | 774.387 | Down |
| Shkbp1    | 1654.79 | 0.33609 | 0.15717 | 2.1384  | 0.03248  | 0.14292  | 1245.56 | 1619.72 | 1523.34 | 1826.31 | 2090.48 | 1623.33 | Up   |
| Blvrb     | 1393.86 | 0.34718 | 0.16569 | 2.09534 | 0.03614  | 0.15417  | 1063.43 | 1255.72 | 1361.55 | 1615.23 | 1766.96 | 1300.25 | Up   |
| Pld3      | 9800.22 | 0.96632 | 0.15898 | 6.07816 | 1.22E-09 | 1.06E-07 | 6634.17 | 7491.93 | 5780.51 | 12839.2 | 15035.1 | 11020.4 | Up   |
| 9530053A  | 805.143 | -0.6348 | 0.26913 | -2.3588 | 0.01833  | 0.09644  | 1083.01 | 630.329 | 1225.11 | 757.648 | 495.574 | 639.192 | Down |
| Eid2b     | 439.97  | -0.3371 | 0.14399 | -2.3412 | 0.01922  | 0.09958  | 447.5   | 534.645 | 491.212 | 387.492 | 413.15  | 365.821 | Down |
| Supt5     | 1778.96 | 0.31469 | 0.13776 | 2.28435 | 0.02235  | 0.10989  | 1790    | 1419.47 | 1547.71 | 2007.82 | 1782.42 | 2126.33 | Up   |
| Acp7      | 104.593 | -1.6185 | 0.56526 | -2.8633 | 0.00419  | 0.03279  | 218.364 | 59.1858 | 195.9   | 46.9069 | 23.6969 | 83.5026 | Down |
| Gm44618   | 31.3042 | -1.3607 | 0.50116 | -2.715  | 0.00663  | 0.04576  | 66.5865 | 33.5386 | 35.0866 | 19.3746 | 12.3636 | 20.8756 | Down |
| Lgals4    | 650.759 | -0.4357 | 0.14288 | -3.0497 | 0.00229  | 0.02097  | 702.096 | 726.999 | 815.763 | 618.967 | 506.907 | 533.82  | Down |
| Actn4     | 16055.1 | 0.30598 | 0.08914 | 3.43255 | 0.0006   | 0.00742  | 15077.9 | 14383.1 | 13615.5 | 17689   | 18548.5 | 17016.6 | Up   |
| Catsperg1 | 135.007 | -0.3865 | 0.16409 | -2.3552 | 0.01851  | 0.09719  | 385.81  | 317.63  | 367.434 | 249.83  | 275.09  | 294.247 | Down |
| Kcnk6     | 1328.08 | 0.49264 | 0.13162 | 3.74279 | 0.00018  | 0.00298  | 1203.45 | 1133.41 | 973.653 | 1446.98 | 1671.14 | 1539.83 | Up   |
| Dpf1      | 51.5435 | -0.9261 | 0.40814 | -2.2691 | 0.02326  | 0.11297  | 76.3786 | 40.4436 | 85.7672 | 40.7886 | 36.0604 | 29.8224 | Down |
| Zfp74     | 1107.97 | -0.4229 | 0.19757 | -2.1404 | 0.03232  | 0.14241  | 1464.9  | 955.85  | 1386.89 | 935.079 | 832.481 | 1072.61 | Down |
| Zfp568    | 1243.01 | 0.23726 | 0.10907 | 2.17526 | 0.02961  | 0.13386  | 1096.72 | 1144.26 | 1182.22 | 1259.35 | 1331.15 | 1444.4  | Up   |
| Syne4     | 925.638 | -0.5009 | 0.20492 | -2.4443 | 0.01451  | 0.08156  | 1198.56 | 826.628 | 1229.01 | 892.251 | 643.937 | 763.452 | Down |
| Tyrobp    | 2652.39 | 1.02751 | 0.24733 | 4.21576 | 2.49E-05 | 0.00059  | 1642.14 | 2281.61 | 1313.8  | 3435.42 | 4482.83 | 2758.57 | Up   |
| Zbtb32    | 414.716 | -0.6206 | 0.26662 | -2.3275 | 0.01994  | 0.10206  | 319.223 | 520.835 | 667.62  | 331.407 | 313.211 | 335.999 | Down |
| Upk1a     | 105.453 | -1.3909 | 0.34532 | -4.028  | 5.62E-05 | 0.00115  | 133.173 | 105.548 | 219.291 | 63.2223 | 60.7876 | 50.698  | Down |
| Tmem147   | 2545.67 | -0.2404 | 0.08815 | -2.7272 | 0.00639  | 0.04464  | 2768.23 | 2834.01 | 2669.5  | 2415.7  | 2343.93 | 2242.64 | Down |
| Ffar2     | 347.733 | 0.94974 | 0.29741 | 3.19336 | 0.00141  | 0.01426  | 331.953 | 216.028 | 163.737 | 342.624 | 542.967 | 489.087 | Up   |
| Cd22      | 1180.47 | 1.17577 | 0.19222 | 6.11668 | 9.55E-10 | 8.57E-08 | 584.59  | 897.651 | 691.011 | 1454.11 | 1867.93 | 1587.54 | Up   |
| Mag       | 171.151 | 0.97046 | 0.18661 | 5.20056 | 1.99E-07 | 1.01E-05 | 122.402 | 116.399 | 108.184 | 242.692 | 221.514 | 215.715 | Up   |
| Lsr       | 1608.94 | 0.35007 | 0.11028 | 3.17445 | 0.0015   | 0.015    | 1535.41 | 1313.92 | 1394.69 | 1891.57 | 1753.57 | 1764.49 | Up   |
| Fxyd5     | 5058.83 | 0.67099 | 0.16656 | 4.02863 | 5.61E-05 | 0.00115  | 4301.68 | 4040.42 | 3367.34 | 6164.18 | 7316.15 | 5163.24 | Up   |
| Fxyd1     | 1223.31 | -0.2854 | 0.12058 | -2.3674 | 0.01792  | 0.09518  | 1352.29 | 1232.05 | 1447.32 | 1062.54 | 1187.93 | 1057.7  | Down |
| Scn1b     | 1438.32 | -0.7073 | 0.19411 | -3.6439 | 0.00027  | 0.004    | 1800.77 | 1364.23 | 2187.06 | 1105.37 | 973.632 | 1198.86 | Down |
| 4931406P  | 1214.62 | 0.49422 | 0.14986 | 3.29791 | 0.00097  | 0.01076  | 1054.61 | 945     | 1026.28 | 1301.16 | 1281.69 | 1679    | Up   |
| Kctd15    | 820.677 | -0.2662 | 0.13226 | -2.013  | 0.04412  | 0.17563  | 949.836 | 802.954 | 935.642 | 731.136 | 804.663 | 699.831 | Down |
| Cep89     | 1085.8  | -0.8783 | 0.23855 | -3.6816 | 0.00023  | 0.0036   | 1664.66 | 913.434 | 1641.27 | 786.2   | 684.118 | 825.085 | Down |
| Nudt19    | 938.615 | -0.5751 | 0.21758 | -2.6431 | 0.00822  | 0.0536   | 1227.93 | 775.334 | 1366.43 | 794.358 | 745.936 | 721.701 | Down |
| Pdcd5     | 1011.32 | -0.586  | 0.21496 | -2.7261 | 0.00641  | 0.04472  | 1423.78 | 867.072 | 1350.83 | 849.423 | 881.935 | 694.861 | Down |
| Dpy19l3   | 1085.9  | -0.7101 | 0.17186 | -4.1317 | 3.60E-05 | 0.0008   | 1609.83 | 1322.8  | 1111.08 | 828.008 | 749.027 | 894.671 | Down |
| Tshz3     | 457.301 | -0.3349 | 0.15173 | -2.2071 | 0.0273   | 0.12624  | 559.13  | 459.676 | 511.679 | 421.142 | 364.726 | 427.454 | Down |
| Zfp536    | 21.9025 | -1.3294 | 0.59097 | -2.2495 | 0.02448  | 0.11694  | 47.9814 | 20.715  | 25.3403 | 12.2366 |         |         |      |

|          |         |         |         |         |          |          |         |         |         |         |         |         |      |
|----------|---------|---------|---------|---------|----------|----------|---------|---------|---------|---------|---------|---------|------|
| Zfp658   | 470.277 | 0.67579 | 0.16947 | 3.9877  | 6.67E-05 | 0.00133  | 345.662 | 412.328 | 328.449 | 535.35  | 537.816 | 662.056 | Up   |
| Siglece  | 307.54  | 0.73271 | 0.20735 | 3.53374 | 0.00041  | 0.00554  | 209.552 | 271.268 | 212.469 | 309.993 | 423.453 | 418.507 | Up   |
| 2310002F | 230.178 | -0.748  | 0.36388 | -2.0558 | 0.03981  | 0.16457  | 357.413 | 210.11  | 298.236 | 144.8   | 105.09  | 265.419 | Down |
| Klk1b3   | 7.94249 | 2.82089 | 1.29547 | 2.1775  | 0.02944  | 0.13336  | 0       | 5.91858 | 0       | 17.3352 | 15.4545 | 8.94671 | Up   |
| Lrrc4b   | 30.7002 | -1.1295 | 0.51817 | -2.1799 | 0.02927  | 0.13281  | 48.9606 | 39.4572 | 38.0105 | 8.15772 | 25.7575 | 23.8579 | Down |
| 5430431A | 58.7236 | -1.1431 | 0.55509 | -2.0592 | 0.03947  | 0.16363  | 84.2123 | 40.4436 | 117.93  | 25.4929 | 21.6363 | 62.6269 | Down |
| Napsa    | 149.528 | 0.61012 | 0.27874 | 2.18883 | 0.02861  | 0.13081  | 125.339 | 148.951 | 80.8941 | 170.292 | 166.908 | 204.78  | Up   |
| Ptov1    | 7075.93 | -0.231  | 0.09243 | -2.4993 | 0.01245  | 0.07249  | 7623.17 | 7878.61 | 7421.79 | 6984.03 | 6354.88 | 6193.11 | Down |
| Fuz      | 783.581 | -0.6027 | 0.15534 | -3.88   | 0.0001   | 0.00193  | 983.13  | 797.035 | 1054.55 | 677.091 | 587.27  | 602.412 | Down |
| Prmt1    | 3447.21 | -0.2222 | 0.09296 | -2.3906 | 0.01682  | 0.09092  | 3751.36 | 3698.12 | 3687.02 | 3420.12 | 3085.74 | 3040.89 | Down |
| Fcgrt    | 2106    | 0.40189 | 0.10421 | 3.85674 | 0.00011  | 0.00208  | 1751.81 | 1946.23 | 1745.56 | 2345.34 | 2542.78 | 2304.27 | Up   |
| Flt3l    | 6.73084 | -2.4926 | 1.04146 | -2.3934 | 0.01669  | NA       | 19.5843 | 6.90501 | 7.79702 | 1.01971 | 3.0909  | 1.98816 | Down |
| Slc17a7  | 39.7621 | -2.1429 | 1.0835  | -1.9777 | 0.04796  | 0.18606  | 118.485 | 4.93215 | 71.1478 | 2.03943 | 6.18179 | 35.7868 | Down |
| Gfy      | 48.211  | -1.9054 | 0.3585  | -5.315  | 1.07E-07 | 5.88E-06 | 81.2747 | 67.0772 | 79.9194 | 23.4534 | 21.6363 | 15.9053 | Down |
| Ccdc155  | 366.625 | -1.7624 | 0.22471 | -7.8428 | 4.41E-15 | 1.21E-12 | 496.461 | 475.459 | 727.072 | 180.49  | 146.302 | 173.964 | Down |
| Dkk1     | 398.768 | -1.3962 | 0.19966 | -6.993  | 2.69E-12 | 3.94E-10 | 576.756 | 512.943 | 644.229 | 171.312 | 233.878 | 253.49  | Down |
| Ppfia3   | 236.628 | -0.6836 | 0.3151  | -2.1696 | 0.03004  | 0.13517  | 342.724 | 171.639 | 360.612 | 220.258 | 154.545 | 169.987 | Down |
| AC151602 | 1344.52 | -0.8321 | 0.29654 | -2.8062 | 0.00501  | 0.03745  | 2073.97 | 1077.18 | 2014.55 | 1060.5  | 647.027 | 1193.89 | Down |
| Ruvbl2   | 3817.48 | -0.6127 | 0.13768 | -4.4501 | 8.58E-06 | 0.00025  | 4747.22 | 3998    | 5103.15 | 3234.54 | 2705.56 | 3116.44 | Down |
| Ftl1     | 44920.1 | 0.36191 | 0.15701 | 2.305   | 0.02117  | 0.10633  | 36564.8 | 38296.2 | 43084.4 | 50571.7 | 59592.5 | 41411.3 | Up   |
| Ppp1r15a | 2178.49 | 0.45144 | 0.15517 | 2.90929 | 0.00362  | 0.02958  | 1783.15 | 1976.8  | 1761.15 | 2910.27 | 2578.84 | 2060.72 | Up   |
| Sec1     | 369.121 | 0.95005 | 0.20657 | 4.59911 | 4.24E-06 | 0.00014  | 244.803 | 225.892 | 284.591 | 426.241 | 603.755 | 429.442 | Up   |
| Car11    | 142.191 | 0.69357 | 0.35126 | 1.97455 | 0.04832  | 0.18675  | 94.0044 | 164.734 | 67.2493 | 160.095 | 205.029 | 162.035 | Up   |
| Fam83e   | 2034.73 | 0.82581 | 0.28627 | 2.8847  | 0.00392  | 0.03124  | 1728.31 | 781.252 | 1893.7  | 2619.65 | 2610.78 | 2574.66 | Up   |
| Sult2b1  | 307.216 | -0.7083 | 0.22466 | -3.1529 | 0.00162  | 0.01589  | 401.477 | 441.92  | 300.185 | 245.751 | 188.545 | 265.419 | Down |
| Grin2d   | 226.583 | 0.71406 | 0.22767 | 3.13633 | 0.00171  | 0.01663  | 134.152 | 216.028 | 164.712 | 265.126 | 309.09  | 270.389 | Up   |
| Emp3     | 1684.46 | 0.41417 | 0.14774 | 2.80333 | 0.00506  | 0.0377   | 1477.63 | 1509.24 | 1345.96 | 1998.64 | 2171.87 | 1603.45 | Up   |
| Ccdc114  | 2830.04 | -0.6411 | 0.24372 | -2.6306 | 0.00852  | 0.0551   | 3552.58 | 2482.84 | 4310.78 | 2584.98 | 1616.54 | 2432.51 | Down |
| Abcc6    | 33.6722 | -2.232  | 0.45477 | -4.908  | 9.20E-07 | 3.71E-05 | 70.5033 | 49.3215 | 46.7821 | 12.2366 | 9.27269 | 13.9171 | Down |
| Saa3     | 921.61  | 2.03143 | 0.3781  | 5.37266 | 7.76E-08 | 4.54E-06 | 262.429 | 227.865 | 596.472 | 1481.65 | 958.178 | 2003.07 | Up   |
| Saa4     | 16.3444 | 1.66244 | 0.66684 | 2.49872 | 0.01246  | 0.07256  | 7.8337  | 6.90501 | 8.77165 | 19.3746 | 14.4242 | 40.7572 | Up   |
| Saa1     | 16.5959 | 1.53816 | 0.58525 | 2.62822 | 0.00858  | 0.05534  | 6.85449 | 11.8372 | 6.82239 | 30.5914 | 20.606  | 22.8638 | Up   |
| Tmem86a  | 895.972 | 0.45382 | 0.22217 | 2.04265 | 0.04109  | 0.1677   | 607.112 | 703.324 | 958.059 | 1123.73 | 1171.45 | 812.162 | Up   |
| Gmpgprb1 | 3.92471 | -4.3682 | 1.8018  | -2.4243 | 0.01534  | NA       | 16.6466 | 1.97286 | 3.89851 | 0       | 1.0303  | 0       | Down |
| Nell1    | 83.1204 | -2.0016 | 0.74716 | -2.6789 | 0.00739  | 0.04945  | 251.658 | 23.6743 | 123.778 | 27.5323 | 14.4242 | 57.6566 | Down |
| Gm45235  | 23.5911 | -1.1671 | 0.54975 | -2.123  | 0.03375  | 0.14684  | 27.418  | 28.6065 | 41.909  | 7.138   | 19.5757 | 16.8993 | Down |
| Cyfp1    | 6368.5  | 0.26976 | 0.09783 | 2.75747 | 0.00583  | 0.04185  | 5826.32 | 5980.72 | 5517.37 | 6719.92 | 7523.24 | 6643.43 | Up   |
| Nipa2    | 2232.25 | 0.45417 | 0.12123 | 3.74647 | 0.00018  | 0.00294  | 2068.1  | 1824.89 | 1758.23 | 2406.53 | 2814.78 | 2520.98 | Up   |
| Nipa1    | 315.824 | -0.4524 | 0.22532 | -2.0077 | 0.04468  | 0.17701  | 434.77  | 261.404 | 398.623 | 266.146 | 259.635 | 274.366 | Down |
| Gm34121  | 82.1835 | -0.8375 | 0.37382 | -2.2403 | 0.02507  | 0.11898  | 121.422 | 71.0229 | 123.778 | 61.1829 | 39.1513 | 76.544  | Down |
| Snhg14   | 540.639 | -0.4948 | 0.16766 | -2.9514 | 0.00316  | 0.02669  | 565.006 | 576.075 | 756.311 | 452.753 | 424.483 | 469.205 | Down |
| A230057C | 1314.77 | -0.5691 | 0.20302 | -2.8034 | 0.00506  | 0.0377   | 1410.07 | 1240.93 | 2061.34 | 1123.73 | 1011.75 | 1040.8  | Down |
| A330076f | 336.108 | -0.4949 | 0.24555 | -2.0154 | 0.04386  | 0.17506  | 373.08  | 282.119 | 524.349 | 286.54  | 278.181 | 272.378 | Down |
| Mtmr10   | 314.879 | 0.41224 | 0.16059 | 2.56709 | 0.01026  | 0.0631   | 296.701 | 264.363 | 249.505 | 330.388 | 389.453 | 358.862 | Up   |
| Mcee     | 1638.56 | -0.4156 | 0.1624  | -2.5588 | 0.0105   | 0.0642   | 2048.51 | 1569.41 | 2000.91 | 1547.93 | 1201.33 | 1463.28 | Down |
| Tjp1     | 16395.9 | 0.29478 | 0.10565 | 2.7903  | 0.00527  | 0.03886  | 13501.4 | 15563.9 | 15114.5 | 17049.6 | 19371.7 | 17774.1 | Up   |
| Aldh1a3  | 65.5561 | -1.0512 | 0.38943 | -2.6994 | 0.00695  | 0.04729  | 109.672 | 52.2808 | 103.31  | 45.8872 | 47.3937 | 34.7927 | Down |
| Cers3    | 91.564  | 1.12721 | 0.28114 | 4.00938 | 6.09E-05 | 0.00123  | 47.9814 | 62.1451 | 62.3761 | 108.09  | 152.484 | 116.307 | Up   |
| Adams17  | 169.414 | -0.5809 | 0.27744 | -2.0939 | 0.03627  | 0.15453  | 230.115 | 239.702 | 139.372 | 156.016 | 134.969 | 116.307 | Down |
| Gm44889  | 28.6469 | -3.1637 | 0.936   | -3.38   | 0.00072  | 0.00852  | 74.4202 | 23.6743 | 56.5284 | 14.276  | 0       | 2.98224 | Down |
| 4933436H | 66.128  | -3.2581 | 0.55386 | -5.8826 | 4.04E-09 | 3.25E-07 | 194.863 | 51.2943 | 113.057 | 16.3154 | 10.303  | 10.9349 | Down |
| Gm44808  | 126.004 | -1.766  | 0.38059 | -4.6401 | 3.48E-06 | 0.00011  | 210.531 | 124.29  | 249.505 | 57.104  | 36.0604 | 78.5322 | Down |
| Gm45007  | 6.73334 | -2.4925 | 0.99284 | -2.5105 | 0.01206  | NA       | 11.7506 | 10.8507 | 11.6955 | 4.07886 | 1.0303  | 0.99408 | Down |
| Fam174b  | 10331.5 | -0.2268 | 0.09795 | -2.3152 | 0.0206   | 0.10443  | 11004.4 | 11788.8 | 10632.2 | 10202.2 | 9353.05 | 9008.34 | Down |
| Gm10619  | 123.954 | -0.6446 | 0.22368 | -2.882  | 0.00395  | 0.03141  | 143.944 | 137.114 | 172.509 | 88.7152 | 103.03  | 98.4138 | Down |
| St8sia2  | 1041.15 | -0.7191 | 0.21248 | -3.3842 | 0.00071  | 0.00841  | 1590.24 | 954.864 | 1341.09 | 835.146 | 668.664 | 856.896 | Down |
| Akap13   | 11992.9 | 0.35601 | 0.14802 | 2.40514 | 0.01617  | 0.08832  | 8988.19 | 12083.8 | 10489.9 | 12423.2 | 15095.9 | 12876.3 | Up   |
| Isg20    | 2714.94 | -0.4787 | 0.17495 | -2.7362 | 0.00621  | 0.04389  | 3332.26 | 2671.25 | 3480.39 | 2493.2  | 1816.42 | 2496.13 | Down |
| Mfge8    | 13094   | 0.31146 | 0.11212 | 2.77795 | 0.00547  | 0.03991  | 10737.1 | 13129.4 | 11191.6 | 14080.2 | 14953.8 | 14471.8 | Up   |
| Polg     | 2298.52 | 0.2531  | 0.10453 | 2.4214  | 0.01546  | 0.08535  | 2182.67 | 2094.19 | 2015.53 | 2584.98 | 2291.38 | 2622.38 | Up   |
| Plin1    | 147.449 | -4.4417 | 1.54601 | -2.873  | 0.00407  | 0.03201  | 733.43  | 20.715  | 91.615  | 17.3352 | 20.606  | 0.99408 | Down |
| Wdr93    | 871.584 | -1.5327 | 0.30257 | -5.0657 | 4.07E-07 | 1.87E-05 | 1535.41 | 832.547 | 1518.47 | 456.832 | 297.756 | 588.494 | Down |
| Mesp1    | 272.516 | -0.8763 | 0.2263  | -3.8721 | 0.00011  | 0.00198  | 343.704 | 436.988 | 277.769 | 173.352 | 217.393 | 185.893 | Down |
| Mesp2    | 206.654 | -0.7572 | 0.25897 | -2.924  | 0.00346  | 0.02851  | 236.969 | 339.332 | 202.722 | 133.583 | 177.211 | 150.106 | Down |
| Zfp710   | 2140.03 | 0.40062 | 0.12578 | 3.18501 | 0.00145  | 0.01457  | 1731.25 | 1962.01 | 1841.07 | 2205.64 | 2731.32 | 2368.89 | Up   |
| Cib1     | 4593.75 | 0.27553 | 0.11301 | 2.43817 | 0.01476  | 0.08255  | 4248.8  | 3780.98 | 4439.43 | 5410.61 | 4703.31 | 4979.34 | Up   |
| Gdpgp1   | 397.381 | 0.42728 | 0.19463 | 2.19533 | 0.02814  | 0.12925  | 315.307 | 394.572 | 307.008 | 382.393 | 533.695 | 451.312 | Up   |
| Ttll13   | 192.484 | -1.3974 | 0.27095 | -5.1574 | 2.50E-07 | 1.23E-05 | 293.764 | 211.096 | 332.348 | 107.07  | 81.3936 | 129.23  | Down |
| Ngrn     | 2104.17 | -0.5019 | 0.146   | -3.4381 | 0.00059  | 0.0073   | 2737.88 | 2206.64 | 2455.09 | 2000.68 | 1638.17 | 1586.55 | Down |
| Man2a2   | 2498.31 | 0.90907 | 0.10662 | 8.52638 | 1.51E-17 | 6.08E-15 | 1767.48 | 1690.74 | 1750.43 | 3000    | 3551.44 | 3229.76 | Up   |
| Fes      | 2713.36 | 0.75874 | 0.13566 | 5.59307 | 2.23E-08 | 1.48E-06 | 2084.74 | 2109.97 | 1852.77 | 3307.96 | 3900.71 | 3023.99 | Up   |
| Furin    | 5923.28 | 0.55475 | 0.14214 | 3.90284 | 9.51E-05 | 0.00178  | 4966.57 | 4853.23 | 4574.9  | 6836.17 | 8285.66 | 6023.12 | Up   |
| Iqgap1   | 35080.8 | 0.39306 | 0.10963 | 3.58531 | 0.00034  | 0.00477  | 30237.1 | 32214.8 | 28542   | 37874.3 | 43994.8 | 37621.9 | Up   |
| Gm37829  | 33.0462 | -1.7837 | 0.54654 | -3.2636 | 0.0011   | 0.01186  | 61.6904 | 28.6065 | 63.3508 | 22.4337 | 9.27269 | 12.923  | Down |
| Fsd2     | 307.912 | -2.1511 | 0.37814 | -5.6886 | 1.28E-08 | 9.14E-07 | 616.904 | 267.322 | 623.761 | 154.997 | 73.1512 | 111.337 | Down |
| Homer2   | 228.66  | -1.0625 | 0.28254 | -3.7604 | 0.00017  | 0.00282  | 361.33  | 348.21  | 218.317 | 150.918 | 111.272 | 181.916 | Down |
| Tm6sf1   | 703.659 | 0.9325  | 0.19562 | 4.76694 | 1.87E-06 | 6.78E-05 | 469.043 | 581.993 | 400.572 | 764.786 | 1032.36 |         |      |

|          |         |         |         |         |          |          |         |         |         |         |         |         |      |
|----------|---------|---------|---------|---------|----------|----------|---------|---------|---------|---------|---------|---------|------|
| Fah      | 2406.32 | -0.5624 | 0.1572  | -3.5778 | 0.00035  | 0.00486  | 3238.26 | 2773.84 | 2596.41 | 2294.36 | 1756.66 | 1778.41 | Down |
| Vmn2r71  | 1.95865 | -4.3918 | 2.07682 | -2.1147 | 0.03446  | NA       | 1.95843 | 3.94572 | 5.84776 | 0       | 0       | 0       | Down |
| Folh1    | 61.2136 | -1.323  | 0.48768 | -2.7128 | 0.00667  | 0.04601  | 51.8983 | 74.9687 | 135.473 | 43.8477 | 41.2119 | 19.8816 | Down |
| Nox4     | 3279.96 | 0.28777 | 0.13486 | 2.13379 | 0.03286  | 0.14414  | 2610.58 | 2842.89 | 3408.27 | 3365.06 | 3743.07 | 3709.9  | Up   |
| Grm5     | 21.5539 | -2.1086 | 0.62139 | -3.3933 | 0.00069  | 0.00824  | 26.4387 | 48.3351 | 30.2134 | 13.2563 | 4.12119 | 6.95855 | Down |
| Gm44751  | 1372.55 | -0.6541 | 0.23828 | -2.7448 | 0.00605  | 0.04303  | 1849.73 | 1590.12 | 1595.46 | 1502.04 | 821.148 | 876.777 | Down |
| Prss23   | 2407.17 | -0.4797 | 0.22607 | -2.1217 | 0.03386  | 0.14716  | 3057.1  | 2461.14 | 2892.69 | 2516.66 | 2159.51 | 1355.92 | Down |
| Me3      | 245.914 | -1.0082 | 0.29494 | -3.4183 | 0.00063  | 0.00772  | 360.35  | 274.227 | 350.866 | 234.534 | 142.181 | 113.325 | Down |
| Ccdc81   | 807.31  | -0.9509 | 0.28236 | -3.3675 | 0.00076  | 0.00884  | 1491.34 | 849.316 | 851.824 | 441.537 | 482.18  | 727.665 | Down |
| Hikeshi  | 1452.76 | -0.2351 | 0.11836 | -1.9863 | 0.047    | 0.18333  | 1638.22 | 1572.37 | 1501.9  | 1467.37 | 1322.9  | 1213.77 | Down |
| Picalm   | 15849.8 | 0.2598  | 0.09559 | 2.71794 | 0.00657  | 0.04557  | 15115.1 | 14806.3 | 13358.2 | 16389.9 | 17769.6 | 17659.8 | Up   |
| Syt12    | 1227.81 | -0.8458 | 0.20526 | -4.1205 | 3.78E-05 | 0.00083  | 1514.84 | 1898.88 | 1319.65 | 958.532 | 676.906 | 998.055 | Down |
| Ccdc89   | 194.353 | -0.8613 | 0.33639 | -2.5604 | 0.01046  | 0.064    | 369.163 | 159.802 | 223.19  | 129.504 | 117.454 | 167.005 | Down |
| Ankrd42  | 1619.35 | -0.719  | 0.21982 | -3.2708 | 0.00107  | 0.01165  | 2184.62 | 1557.57 | 2302.07 | 1319.51 | 913.875 | 1438.43 | Down |
| Prpc     | 2999.21 | 0.45888 | 0.1249  | 3.6741  | 0.00024  | 0.00368  | 2403.97 | 2793.57 | 2381.01 | 3707.68 | 3590.59 | 3118.42 | Up   |
| Gm15501  | 149.566 | -0.4796 | 0.22627 | -2.1197 | 0.03403  | 0.14769  | 192.905 | 181.503 | 148.143 | 140.721 | 127.757 | 106.366 | Down |
| Gab2     | 2658.16 | 0.30821 | 0.14632 | 2.10646 | 0.03516  | 0.1511   | 2113.14 | 2704.79 | 2307.92 | 2756.29 | 3336.11 | 2730.73 | Up   |
| Usp35    | 675.273 | 0.29641 | 0.13326 | 2.22421 | 0.02613  | 0.12269  | 556.193 | 656.962 | 605.244 | 710.741 | 807.754 | 714.742 | Up   |
| Ndufc2   | 5476.27 | -0.2801 | 0.07945 | -3.5256 | 0.00042  | 0.00564  | 6057.41 | 5905.75 | 6055.36 | 5097.55 | 4992.83 | 4748.71 | Down |
| Thrsp    | 1435.22 | -2.1701 | 0.3297  | -6.5821 | 4.64E-11 | 5.56E-09 | 3368.49 | 1466.82 | 2210.45 | 740.313 | 371.938 | 453.3   | Down |
| Rsf1     | 37.9559 | -1.1429 | 0.36649 | -3.1187 | 0.00182  | 0.01737  | 53.8567 | 47.3486 | 55.5538 | 26.5126 | 20.606  | 23.8579 | Down |
| Pak1     | 2582.98 | 0.54242 | 0.11333 | 4.78639 | 1.70E-06 | 6.24E-05 | 2279.61 | 2063.61 | 1965.82 | 3105.03 | 3253.68 | 2830.14 | Up   |
| Gdpd4    | 10.5013 | 2.44277 | 0.15639 | 2.11242 | 0.03465  | 0.14947  | 6.85449 | 0       | 2.92388 | 19.3746 | 29.8787 | 3.97631 | Up   |
| Myo7a    | 1413.45 | 1.04326 | 0.18659 | 5.59121 | 2.25E-08 | 1.49E-06 | 909.689 | 926.257 | 934.668 | 1521.41 | 2421.2  | 1767.47 | Up   |
| Capn5    | 1762.68 | 0.4212  | 0.14248 | 2.95626 | 0.00311  | 0.02641  | 1487.42 | 1460.9  | 1573.05 | 1962.95 | 2350.11 | 1741.63 | Up   |
| B3gnt6   | 52.7677 | -0.8574 | 0.3528  | -2.4304 | 0.01508  | 0.08371  | 68.5449 | 81.8737 | 53.6045 | 45.8872 | 30.909  | 35.7868 | Down |
| Acer3    | 4034.36 | 0.34533 | 0.10634 | 3.24736 | 0.00116  | 0.01245  | 3411.58 | 3885.55 | 3364.41 | 4261.39 | 4595.13 | 4688.07 | Up   |
| Tsku     | 1178.75 | -0.5475 | 0.2783  | -1.9673 | 0.04915  | 0.189    | 1300.39 | 931.19  | 1967.77 | 978.926 | 749.027 | 1145.18 | Down |
| Lrrc32   | 2802.63 | 0.40222 | 0.09596 | 4.19158 | 2.77E-05 | 0.00064  | 2340.32 | 2505.53 | 2397.58 | 2977.57 | 3310.35 | 3284.44 | Up   |
| Wnt11    | 1844.81 | -1.06   | 0.28471 | -3.723  | 0.0002   | 0.00315  | 2614.5  | 1548.69 | 3317.63 | 1369.48 | 870.602 | 1347.97 | Down |
| Uvrug    | 3198.08 | 0.20535 | 0.08039 | 2.55437 | 0.01064  | 0.06482  | 2980.72 | 3036.23 | 2895.62 | 3369.14 | 3504.05 | 3402.73 | Up   |
| Gdpd5    | 1345.32 | 0.27866 | 0.11449 | 2.43385 | 0.01494  | 0.0832   | 1238.7  | 1242.9  | 1165.65 | 1491.84 | 1591.81 | 1341.01 | Up   |
| Slo2b1   | 932.633 | 0.53347 | 0.16937 | 3.14971 | 0.00163  | 0.01602  | 740.285 | 670.772 | 875.215 | 1065.6  | 1280.66 | 963.262 | Up   |
| Neu3     | 371.143 | -0.3613 | 0.18064 | -2.0002 | 0.04548  | 0.17928  | 424.978 | 473.486 | 353.79  | 309.993 | 298.787 | 365.821 | Down |
| Xrra1    | 175.851 | -0.7981 | 0.22882 | -3.4878 | 0.00049  | 0.00632  | 222.281 | 182.489 | 265.099 | 140.721 | 112.303 | 132.212 | Down |
| Ucp3     | 397.929 | 1.46799 | 0.34265 | 4.28428 | 1.83E-05 | 0.00046  | 251.658 | 261.404 | 120.854 | 545.547 | 800.542 | 407.572 | Up   |
| Dnajb13  | 1763.22 | -0.5852 | 0.22691 | -2.5788 | 0.00991  | 0.06145  | 2728.09 | 1557.57 | 2062.31 | 1554.05 | 1137.45 | 1539.83 | Down |
| Plekhhb1 | 10035.8 | -0.3794 | 0.09992 | -3.7974 | 0.00015  | 0.00251  | 11654.6 | 11102.3 | 11287.2 | 8900.07 | 7933.3  | 9337.38 | Down |
| Relt     | 384.824 | 0.41238 | 0.2056  | 2.00569 | 0.04489  | 0.17771  | 262.429 | 329.467 | 398.623 | 418.083 | 500.725 | 399.62  | Up   |
| P2ry6    | 952.495 | 0.62328 | 0.21668 | 2.87653 | 0.00402  | 0.0318   | 635.509 | 991.362 | 622.787 | 1119.65 | 1318.78 | 1026.88 | Up   |
| P2ry2    | 1558.02 | 0.78599 | 0.1252  | 6.27779 | 3.43E-10 | 3.26E-08 | 1200.51 | 1220.21 | 1010.69 | 1903.81 | 2115.2  | 1897.7  | Up   |
| Fchs2    | 495.68  | 0.58383 | 0.20072 | 2.90867 | 0.00363  | 0.02962  | 440.646 | 331.44  | 418.115 | 471.108 | 638.785 | 673.985 | Up   |
| Stard10  | 5007.35 | -0.215  | 0.10593 | -2.0295 | 0.04241  | 0.17118  | 5738.19 | 4941.03 | 5459.86 | 4933.38 | 4554.95 | 4416.69 | Down |
| Art5     | 13.2954 | -1.7603 | 0.83818 | -2.1001 | 0.03572  | 0.15281  | 24.4803 | 7.89144 | 29.2388 | 2.03943 | 6.18179 | 9.94079 | Down |
| Art1     | 10.7589 | -3.5747 | 1.54677 | -2.3111 | 0.02083  | 0.10511  | 25.4595 | 0.98643 | 33.1373 | 0       | 0       | 4.97039 | Down |
| Chrna10  | 9.68227 | -2.2393 | 0.85631 | -2.6151 | 0.00892  | 0.05693  | 19.5843 | 6.90501 | 21.4418 | 3.05914 | 4.12119 | 2.98224 | Down |
| Trim6    | 289.984 | 0.78633 | 0.21979 | 3.57759 | 0.00035  | 0.00486  | 191.926 | 266.336 | 180.306 | 401.768 | 388.423 | 311.147 | Up   |
| Trim34a  | 296.263 | 2.20553 | 0.45117 | 4.8885  | 1.02E-06 | 4.02E-05 | 117.506 | 115.412 | 83.8179 | 164.174 | 661.452 | 635.216 | Up   |
| Trim5    | 182.22  | 2.81334 | 0.90309 | 3.11524 | 0.00184  | 0.01752  | 51.8983 | 37.4843 | 46.7821 | 53.0252 | 636.724 | 267.407 | Up   |
| Trim12a  | 411.005 | 10.2956 | 1.5971  | 6.44641 | 1.15E-10 | 1.20E-08 | 0       | 0.98643 | 0.97463 | 0       | 1321.87 | 1142.2  | Up   |
| Trim30d  | 293.946 | 4.5649  | 1.101   | 4.14614 | 3.38E-05 | 0.00076  | 15.6674 | 22.6879 | 33.1373 | 39.7689 | 827.33  | 825.085 | Up   |
| Cckbr    | 69.7548 | -2.7991 | 0.76078 | -3.6793 | 0.00023  | 0.00363  | 261.45  | 19.7286 | 84.7926 | 14.276  | 14.4242 | 23.8579 | Down |
| Hpx      | 237.666 | -0.6482 | 0.31568 | -2.0534 | 0.04004  | 0.16518  | 326.078 | 222.933 | 321.627 | 178.45  | 117.454 | 259.454 | Down |
| Trim3    | 6652.4  | -0.299  | 0.12508 | -2.3907 | 0.01682  | 0.09092  | 7811.18 | 7869.74 | 6337.03 | 6062.21 | 6241.55 | 5592.69 | Down |
| Tpp1     | 11540.2 | 0.31935 | 0.1218  | 2.62193 | 0.00874  | 0.05607  | 10066.3 | 11560   | 9178.07 | 12400.8 | 13660.7 | 12375.3 | Up   |
| Gvin1    | 54.7368 | 1.09336 | 0.52653 | 2.07656 | 0.03784  | 0.15885  | 23.5011 | 32.5522 | 48.7314 | 33.6506 | 116.424 | 73.5618 | Up   |
| Gm8995   | 1217.79 | 0.65463 | 0.24405 | 2.68235 | 0.00731  | 0.0491   | 789.245 | 1023.91 | 1025.31 | 972.808 | 1704.11 | 1791.33 | Up   |
| Gm1966   | 60.2539 | 5.68669 | 1.72762 | 3.29163 | 0.001    | 0.01097  | 1.95843 | 4.93215 | 0       | 3.05914 | 188.545 | 163.029 | Up   |
| Syt9     | 85.0814 | -1.3973 | 0.3733  | -3.7432 | 0.00018  | 0.00297  | 134.152 | 88.7787 | 147.169 | 34.6703 | 38.121  | 67.5973 | Down |
| Olfra482 | 38.547  | -1.4506 | 0.57507 | -2.5224 | 0.01166  | 0.06907  | 71.4825 | 30.5793 | 67.2493 | 35.69   | 12.3636 | 13.9171 | Down |
| Stk33    | 1893.45 | -0.6282 | 0.29504 | -2.1292 | 0.03324  | 0.14535  | 2416.7  | 1708.5  | 2772.81 | 1645.82 | 866.481 | 1950.38 | Down |
| Trim66   | 39.9122 | -1.1302 | 0.46792 | -2.4154 | 0.01572  | 0.08638  | 49.9399 | 32.5522 | 81.8687 | 28.552  | 23.6969 | 22.8638 | Down |
| BC051019 | 3884.44 | -0.5657 | 0.26739 | -2.1155 | 0.03439  | 0.14874  | 5131.07 | 3307.5  | 5470.58 | 3663.84 | 2029.69 | 3703.94 | Down |
| Scube2   | 875.888 | -0.2681 | 0.12101 | -2.2152 | 0.02675  | 0.12472  | 1014.46 | 900.61  | 956.109 | 809.654 | 731.512 | 842.979 | Down |
| Tmem41b  | 3582.16 | 0.22182 | 0.11225 | 1.97623 | 0.04813  | 0.18643  | 3260.78 | 3634.99 | 3026.22 | 3663.84 | 4051.13 | 3856.03 | Up   |
| Gm28863  | 70.6222 | -0.9038 | 0.41021 | -2.2032 | 0.02758  | 0.12737  | 71.4825 | 84.8329 | 119.879 | 58.1237 | 26.7878 | 62.6269 | Down |
| Galnt18  | 6843.81 | -0.3374 | 0.08946 | -3.7715 | 0.00016  | 0.00271  | 7697.59 | 7807.59 | 7415.94 | 6326.31 | 6159.12 | 5656.31 | Down |
| Rassf10  | 471.034 | -1.4325 | 0.40072 | -3.5747 | 0.00035  | 0.0049   | 856.811 | 391.613 | 813.814 | 326.309 | 120.545 | 317.111 | Down |
| Gm5599   | 16.174  | -3.4581 | 0.96615 | -3.5792 | 0.00034  | 0.00485  | 30.3556 | 10.8507 | 47.7567 | 5.09857 | 0       | 2.98224 | Down |
| Gm33586  | 98.9379 | -2.2737 | 0.6483  | -3.5072 | 0.00045  | 0.00597  | 214.448 | 60.1722 | 217.342 | 38.7492 | 8.24239 | 54.6743 | Down |
| Arntl    | 1134.84 | -1.4758 | 0.56872 | -2.5949 | 0.00946  | 0.0593   | 2228.69 | 2198.75 | 580.878 | 593.474 | 605.815 | 601.418 | Down |
| Pik3c2a  | 1693.45 | 0.58896 | 0.10806 | 5.45033 | 5.03E-08 | 3.05E-06 | 1309.21 | 1385.93 | 1362.53 | 1898.71 | 1990.54 | 2213.81 | Up   |
| Nucb2    | 3745.23 | 0.55298 | 0.0847  | 6.52866 | 6.64E-11 | 7.66E-09 | 3104.1  | 3062.86 | 2941.43 | 4646.84 | 4357.13 | 4359.03 | Up   |
| Gm45151  | 67.5542 | 0.66533 | 0.27949 | 2.3805  | 0.01729  | 0.09287  | 52.8775 | 44.3893 | 59.4523 | 81.5772 | 85.5148 | 81.5144 | Up   |
| 4732496C | 379.747 | 0.4494  | 0.18874 | 2.38113 | 0.01726  | 0.09277  | 354.475 | 300.861 | 307.982 | 451.734 | 355.453 | 507.974 | Up   |
| Gm4366   | 749.191 | -0.2832 | 0.11711 | -2.418  | 0.01561  | 0.08601  | 821.559 | 878.909 | 767.032 | 695.446 | 654.24  | 677.962 | Down |
| Itpril2  | 7482.39 | 0.41773 | 0.11614 | 3.59671 | 0.00032  | 0.00462  | 6027.05 | 5959.02 | 7233.68 | 8744.06 | 8776.08 | 8154.43 | Up   |

|          |         |         |         |         |          |          |         |         |         |         |         |         |      |
|----------|---------|---------|---------|---------|----------|----------|---------|---------|---------|---------|---------|---------|------|
| Abca15   | 11.4554 | -5.9562 | 1.41741 | -4.2022 | 2.64E-05 | 0.00062  | 10.7713 | 34.525  | 22.4164 | 1.01971 | 0       | 0       | Down |
| Vwa3a    | 5304.49 | -0.8741 | 0.26622 | -3.2832 | 0.00103  | 0.01121  | 7515.46 | 4632.27 | 8444.17 | 4386.81 | 2573.69 | 4274.54 | Down |
| Gm5737   | 324.324 | -0.7738 | 0.34069 | -2.2714 | 0.02312  | 0.11243  | 465.126 | 297.902 | 464.897 | 265.126 | 129.818 | 323.076 | Down |
| Cdr2     | 1428.56 | -0.4604 | 0.20343 | -2.2631 | 0.02363  | 0.11407  | 2121.95 | 1373.11 | 1468.76 | 1093.13 | 1112.72 | 1401.65 | Down |
| Mfscd13b | 45.9867 | -1.1662 | 0.4994  | -2.3353 | 0.01953  | 0.10045  | 40.1477 | 54.2536 | 96.4881 | 37.7295 | 16.4848 | 30.8164 | Down |
| Gga2     | 1651.93 | 0.24369 | 0.11059 | 2.20365 | 0.02755  | 0.12728  | 1419.86 | 1522.06 | 1596.44 | 1785.52 | 1671.14 | 1916.58 | Up   |
| Ubf1d1   | 2485.94 | -0.2402 | 0.08867 | -2.7092 | 0.00674  | 0.0463   | 2732.98 | 2737.34 | 2607.13 | 2249.49 | 2205.87 | 2382.81 | Down |
| Ndufab1  | 1983.88 | -0.3489 | 0.10346 | -3.3726 | 0.00074  | 0.00871  | 2341.3  | 2139.57 | 2187.06 | 1851.8  | 1631.99 | 1751.57 | Down |
| Arhgap17 | 3349.01 | 0.34768 | 0.10882 | 3.19492 | 0.0014   | 0.0142   | 3052.21 | 2983.95 | 2805.95 | 3593.48 | 4131.5  | 3526.99 | Up   |
| Gsg1l    | 77.5598 | -0.8989 | 0.30418 | -2.9552 | 0.00312  | 0.02647  | 81.2747 | 112.453 | 109.158 | 43.8477 | 65.9391 | 52.6862 | Down |
| 1700123J | 28.3065 | -1.7116 | 0.63017 | -2.7162 | 0.0066   | 0.04576  | 47.0022 | 18.7422 | 64.3254 | 15.2957 | 17.5151 | 6.95855 | Down |
| Sbk1     | 762.304 | -0.3291 | 0.12828 | -2.5656 | 0.0103   | 0.06325  | 791.204 | 821.696 | 933.693 | 719.919 | 653.209 | 654.104 | Down |
| Gm30928  | 164.749 | -0.4298 | 0.18802 | -2.2857 | 0.02227  | 0.10968  | 191.926 | 172.625 | 202.722 | 140.721 | 146.302 | 134.201 | Down |
| Lat      | 444.916 | -0.3885 | 0.13459 | -2.8861 | 0.0039   | 0.03114  | 480.793 | 530.699 | 501.933 | 407.886 | 357.514 | 390.673 | Down |
| Apobr    | 802.631 | 0.83057 | 0.21463 | 3.86981 | 0.00011  | 0.00199  | 516.045 | 726.999 | 490.238 | 994.222 | 1236.36 | 851.925 | Up   |
| Nupr1    | 13799.4 | -0.6209 | 0.17441 | -3.5602 | 0.00037  | 0.00509  | 20560.5 | 14961.2 | 14650.6 | 12556.8 | 9841.41 | 10226.1 | Down |
| Sult1a1  | 3757.07 | 0.50024 | 0.22533 | 2.21999 | 0.02642  | 0.12367  | 3149.15 | 2305.29 | 3881.94 | 5481.99 | 4044.95 | 3679.08 | Up   |
| Gm6939   | 71.8547 | -1.1499 | 0.30632 | -3.7539 | 0.00017  | 0.00287  | 89.1084 | 123.304 | 84.7926 | 49.966  | 41.2119 | 42.7454 | Down |
| Gdpc3    | 1368.02 | 0.86595 | 0.23713 | 3.65184 | 0.00026  | 0.00393  | 1274.94 | 860.167 | 772.879 | 1747.79 | 2162.6  | 1389.72 | Up   |
| Hirip3   | 879.875 | -0.2594 | 0.10545 | -2.46   | 0.0139   | 0.07883  | 974.317 | 938.095 | 963.906 | 840.245 | 763.451 | 799.239 | Down |
| Kctd13   | 404.476 | -0.4747 | 0.24162 | -1.9647 | 0.04945  | 0.18952  | 335.87  | 525.767 | 549.69  | 274.303 | 357.514 | 383.714 | Down |
| Cdiptos  | 757.853 | -0.9924 | 0.28025 | -3.5411 | 0.0004   | 0.00541  | 1184.85 | 583.966 | 1257.27 | 561.863 | 449.21  | 509.962 | Down |
| Mvp      | 7644.61 | 0.28142 | 0.09811 | 2.86841 | 0.00413  | 0.03234  | 6525.47 | 6886.27 | 7292.16 | 8082.08 | 8941.96 | 7941.69 | Up   |
| Zg16     | 14.6749 | -1.39   | 0.66718 | -2.0833 | 0.03722  | 0.15704  | 10.7713 | 28.6065 | 24.3657 | 9.17743 | 6.18179 | 8.94671 | Down |
| Zfp768   | 1210.51 | -0.2279 | 0.10908 | -2.089  | 0.0367   | 0.1558   | 1334.67 | 1236.98 | 1345.96 | 1069.68 | 1197.21 | 1078.58 | Down |
| B130055M | 75.995  | -0.743  | 0.31501 | -2.3586 | 0.01835  | 0.09644  | 80.2954 | 119.358 | 85.7672 | 45.8872 | 67.9997 | 56.6625 | Down |
| Ccdc189  | 1637.52 | -0.6549 | 0.20026 | -3.2704 | 0.00107  | 0.01166  | 2247.29 | 1509.24 | 2252.36 | 1439.84 | 1062.24 | 1314.17 | Down |
| Ctf1     | 374.099 | -0.462  | 0.17776 | -2.5989 | 0.00935  | 0.05874  | 404.415 | 425.151 | 470.745 | 325.289 | 358.544 | 260.449 | Down |
| Setd1a   | 160.867 | 0.52467 | 0.22665 | 2.31492 | 0.02062  | 0.10443  | 157.653 | 112.453 | 125.727 | 173.352 | 180.302 | 215.715 | Up   |
| Stx1b    | 429.21  | -0.8619 | 0.31739 | -2.7155 | 0.00662  | 0.04576  | 768.682 | 303.82  | 588.675 | 350.782 | 273.029 | 290.271 | Down |
| Itgax    | 6504.56 | 2.00563 | 0.1555  | 12.8981 | 4.62E-38 | 2.18E-34 | 2672.27 | 2925.75 | 2183.17 | 9765.81 | 11942.2 | 9538.18 | Up   |
| Itgad    | 118.255 | 2.23198 | 0.426   | 5.23936 | 1.61E-07 | 8.42E-06 | 69.5241 | 36.4979 | 18.5179 | 171.312 | 201.938 | 211.739 | Up   |
| 9130023H | 287.784 | -0.4349 | 0.22056 | -1.9717 | 0.04865  | 0.18754  | 257.533 | 419.233 | 315.779 | 237.594 | 241.09  | 255.478 | Down |
| Inpp5f   | 1879.85 | 0.22295 | 0.08744 | 2.5499  | 0.01078  | 0.06532  | 1703.83 | 1783.46 | 1717.29 | 2027.19 | 2076.05 | 1971.26 | Up   |
| Gm39094  | 1116.57 | -2.8577 | 0.7361  | -3.8822 | 0.0001   | 0.00192  | 569.902 | 3809.59 | 1507.75 | 244.732 | 220.484 | 346.933 | Down |
| Fank1    | 1328.07 | -0.8073 | 0.32981 | -2.4476 | 0.01438  | 0.08104  | 2307.03 | 1034.76 | 1728.99 | 1070.7  | 589.331 | 1237.63 | Down |
| Adam12   | 286.209 | -1.4183 | 0.41583 | -3.4107 | 0.00065  | 0.00788  | 197.801 | 435.015 | 616.939 | 129.504 | 113.333 | 224.662 | Down |
| Ebf3     | 24.1608 | -1.6319 | 0.69508 | -2.3477 | 0.01889  | 0.09836  | 64.628  | 13.81   | 31.1881 | 10.1971 | 8.24239 | 16.8993 | Down |
| 9430038I | 435.787 | 0.40082 | 0.20039 | 2.00014 | 0.04548  | 0.17928  | 382.872 | 436.988 | 307.008 | 485.384 | 577.997 | 424.472 | Up   |
| Mapk1ip1 | 2434.68 | -0.2272 | 0.11374 | -1.9974 | 0.04578  | 0.18002  | 2550.85 | 2522.3  | 2804.98 | 2204.62 | 2071.93 | 2453.39 | Down |
| Stk32c   | 365.09  | 0.94396 | 0.34394 | 2.74456 | 0.00606  | 0.04305  | 259.491 | 366.952 | 122.803 | 505.779 | 483.21  | 452.306 | Up   |
| Nkx6-2   | 22.2421 | -1.6959 | 0.72479 | -2.3398 | 0.01929  | 0.09971  | 64.628  | 25.6472 | 11.6955 | 9.17743 | 12.3636 | 9.94079 | Down |
| Cfap46   | 2603.87 | -0.9636 | 0.29269 | -3.2923 | 0.00099  | 0.01095  | 3992.25 | 2225.39 | 4110    | 2065.94 | 1127.15 | 2102.48 | Down |
| Adgra1   | 21.8424 | -1.7315 | 0.81989 | -2.1119 | 0.0347   | 0.14958  | 59.732  | 5.91858 | 35.0866 | 8.15772 | 8.24239 | 13.9171 | Down |
| Kndc1    | 3100.22 | -0.6374 | 0.28775 | -2.2152 | 0.02675  | 0.12472  | 4510.25 | 2420.7  | 4391.67 | 2754.25 | 1594.9  | 2929.55 | Down |
| Gm16201  | 285.828 | -1.1873 | 0.36881 | -3.2192 | 0.00129  | 0.01339  | 408.332 | 228.852 | 554.563 | 168.253 | 115.393 | 239.573 | Down |
| Tubgcp2  | 1893.67 | -0.2243 | 0.08835 | -2.5392 | 0.01111  | 0.06674  | 2019.14 | 1996.53 | 2106.17 | 1792.66 | 1698.96 | 1748.58 | Down |
| Echs1    | 5639.01 | -0.4314 | 0.08094 | -5.3293 | 9.86E-08 | 5.49E-06 | 6617.52 | 6320.05 | 6490.04 | 4923.18 | 4602.34 | 4880.93 | Down |
| 5830411N | 58.4449 | 0.84419 | 0.2934  | 2.87729 | 0.00401  | 0.03175  | 46.023  | 40.4436 | 38.9851 | 69.3406 | 79.333  | 76.544  | Up   |
| Sirt3    | 1295.17 | -0.4527 | 0.17267 | -2.622  | 0.00874  | 0.05607  | 1647.04 | 1241.91 | 1601.31 | 1220.6  | 916.966 | 1143.19 | Down |
| Cox8b    | 19.5932 | -1.5187 | 0.67386 | -2.2538 | 0.02421  | 0.1162   | 48.9606 | 14.7964 | 23.3911 | 6.11829 | 12.3636 | 11.9289 | Down |
| B4galnt4 | 149.682 | -0.8547 | 0.36544 | -2.3389 | 0.01934  | 0.09986  | 205.635 | 114.426 | 258.276 | 75.4589 | 106.121 | 138.177 | Down |
| Ano9     | 323.591 | 0.71685 | 0.23671 | 3.02841 | 0.00246  | 0.02213  | 201.718 | 205.177 | 327.475 | 442.556 | 400.786 | 363.833 | Up   |
| Ptdss2   | 1791.41 | -0.2194 | 0.11105 | -1.9761 | 0.04814  | 0.18643  | 2025.99 | 1796.29 | 1959.98 | 1689.67 | 1527.93 | 1748.58 | Down |
| Lrrc56   | 1332.79 | -0.8883 | 0.25169 | -3.5293 | 0.00042  | 0.00559  | 1963.32 | 1190.62 | 2037.95 | 1033.99 | 690.3   | 1080.56 | Down |
| Cdhr5    | 456.239 | 0.88102 | 0.2444  | 3.60491 | 0.00031  | 0.0045   | 288.868 | 244.635 | 429.811 | 592.454 | 500.725 | 680.944 | Up   |
| Eps8l2   | 1918.85 | 0.29707 | 0.11092 | 2.67813 | 0.0074   | 0.04948  | 1838.96 | 1677.92 | 2295.38 | 2004.96 | 2046.81 | 2046.81 | Up   |
| Pnpla2   | 9164    | 0.26958 | 0.12414 | 2.17153 | 0.02989  | 0.13468  | 8936.3  | 8294.89 | 7699.56 | 10360.3 | 10894.4 | 8798.59 | Up   |
| Muc5ac   | 631.639 | 1.07286 | 0.33643 | 3.18898 | 0.00143  | 0.0144   | 438.687 | 227.865 | 554.563 | 784.161 | 627.452 | 1157.11 | Up   |
| Muc5b    | 27914.1 | 1.00096 | 0.35758 | 2.79923 | 0.00512  | 0.03808  | 26638.5 | 7664.56 | 21500.3 | 39779.1 | 31341.7 | 40560.4 | Up   |
| Gm20501  | 1.96138 | -4.3935 | 2.02848 | -2.1659 | 0.03032  | NA       | 2.93764 | 4.93215 | 3.89851 | 0       | 0       | 0       | Down |
| Gm32786  | 37.1082 | 2.1403  | 0.52324 | 4.09047 | 4.30E-05 | 0.00092  | 17.6258 | 12.8236 | 10.7209 | 91.7743 | 35.0301 | 54.6743 | Up   |
| Gm39115  | 4.88766 | 5.76115 | 1.88103 | 3.06276 | 0.00219  | NA       | 0       | 0       | 0       | 18.3549 | 1.0303  | 9.94079 | Up   |
| Gm7579   | 4.23654 | 5.5542  | 1.63328 | 3.40063 | 0.00067  | NA       | 0       | 0       | 0       | 8.15772 | 10.303  | 6.95855 | Up   |
| Krtap5-5 | 175.652 | 2.50571 | 0.25792 | 9.71493 | 2.60E-22 | 2.24E-19 | 36.2309 | 58.1993 | 63.3508 | 269.205 | 329.696 | 297.229 | Up   |
| Gm40460  | 26.103  | 2.11359 | 0.53194 | 3.97335 | 7.09E-05 | 0.0014   | 6.85449 | 8.87787 | 13.6448 | 40.7886 | 55.6361 | 30.8164 | Up   |
| Ctsd     | 7395.39 | 1.35573 | 0.20647 | 6.56614 | 5.16E-11 | 6.11E-09 | 4623.84 | 4484.31 | 3358.57 | 8889.87 | 13710.2 | 9305.57 | Up   |
| Lsp1     | 3542.87 | 0.42181 | 0.17769 | 2.37389 | 0.0176   | 0.09402  | 2840.7  | 3636.97 | 2608.1  | 3751.53 | 4809.43 | 3610.49 | Up   |
| Tspan32  | 400.688 | 0.79591 | 0.22719 | 3.50325 | 0.00046  | 0.00603  | 220.323 | 363.006 | 295.312 | 453.773 | 596.543 | 475.17  | Up   |
| Cd81     | 9994.53 | 0.37175 | 0.16939 | 2.19459 | 0.02819  | 0.1294   | 8462.36 | 10147.4 | 7531.92 | 11101.6 | 13211.5 | 9512.34 | Up   |
| Kcnq1    | 2646.54 | 0.40438 | 0.12508 | 3.23307 | 0.00122  | 0.01294  | 2152.31 | 2591.35 | 2090.58 | 2851.12 | 3047.62 | 3146.26 | Up   |
| Slc22a18 | 1551.5  | 0.26244 | 0.09756 | 2.6899  | 0.00715  | 0.04826  | 1424.75 | 1345.49 | 1461.94 | 1714.14 | 1745.33 | 1617.37 | Up   |
| Phlda2   | 83.9406 | -0.8468 | 0.34043 | -2.4873 | 0.01287  | 0.07432  | 108.693 | 124.29  | 90.6403 | 82.5969 | 56.6664 | 40.7572 | Down |
| Tnfrsf26 | 437.516 | 1.54089 | 0.30966 | 4.97607 | 6.49E-07 | 2.78E-05 | 234.032 | 310.725 | 126.702 | 578.178 | 781.997 | 593.465 | Up   |
| E230032D | 21.6607 | 1.65071 | 0.55302 | 2.98491 | 0.00284  | 0.02463  | 11.7506 | 12.8236 | 6.82239 | 44.8675 | 28.8484 | 24.852  | Up   |
| Tnfrsf23 | 38.813  | 1.66626 | 0.43684 | 3.81438 | 0.00014  | 0.00239  | 17.6258 | 12.8236 | 25.3403 | 47.9266 | 54.6058 | 74.5559 | Up   |
| Dhcr7    | 2144.06 | 0.63367 | 0.15345 | 4.12958 | 3.63E-05 | 0.0008   | 1695.02 | 1867.31 | 1479.48 | 2451.39 | 3030    |         |      |

|          |         |         |         |         |          |          |         |         |         |         |         |         |      |
|----------|---------|---------|---------|---------|----------|----------|---------|---------|---------|---------|---------|---------|------|
| Retn     | 80.2769 | -4.047  | 1.49537 | -2.7064 | 0.0068   | 0.04659  | 386.789 | 11.8372 | 55.5538 | 1.01971 | 17.5151 | 8.94671 | Down |
| Mcemp1   | 2192.16 | 1.27639 | 0.2498  | 5.10969 | 3.23E-07 | 1.55E-05 | 1315.08 | 1630.57 | 897.632 | 2733.86 | 3986.22 | 2589.57 | Up   |
| Fcor     | 42.5466 | 1.19806 | 0.54973 | 2.17937 | 0.0293   | 0.13289  | 43.0854 | 24.6607 | 9.74627 | 46.9069 | 75.2118 | 55.6684 | Up   |
| Fcer2a   | 1030.39 | 1.2688  | 0.27767 | 4.5695  | 4.89E-06 | 0.00015  | 378.955 | 869.044 | 565.284 | 1345    | 1359.99 | 1664.09 | Up   |
| Cd209b   | 72.6658 | -1.3476 | 0.49635 | -2.7151 | 0.00663  | 0.04576  | 143.944 | 117.385 | 51.6552 | 23.4534 | 60.7876 | 38.7691 | Down |
| Gm16589  | 105.236 | 0.5361  | 0.26784 | 2.00156 | 0.04533  | 0.17885  | 84.2123 | 86.8058 | 86.7418 | 94.8335 | 126.727 | 152.094 | Up   |
| Cd209f   | 94.8288 | -1.5382 | 0.29575 | -5.2011 | 1.98E-07 | 1.01E-05 | 154.716 | 132.182 | 136.448 | 36.7097 | 44.3028 | 64.6151 | Down |
| Cd209g   | 36.2289 | -1.4053 | 0.5184  | -2.7109 | 0.00671  | 0.04611  | 68.5449 | 52.2808 | 37.0358 | 11.2169 | 16.4848 | 31.8105 | Down |
| Lrrc8e   | 955.393 | 0.26601 | 0.10539 | 2.52406 | 0.0116   | 0.0688   | 834.289 | 852.275 | 916.15  | 1020.73 | 1031.33 | 1077.58 | Up   |
| Ctnx1    | 2143.84 | -0.8384 | 0.2408  | -3.4818 | 0.0005   | 0.00642  | 2911.2  | 1982.72 | 3355.64 | 1700.88 | 1129.21 | 1783.38 | Down |
| Myo16    | 30.7028 | -1.0549 | 0.51808 | -2.0361 | 0.04174  | 0.16953  | 29.3764 | 36.4979 | 58.4776 | 29.5717 | 13.3939 | 16.8993 | Down |
| Col4a1   | 11062.2 | 0.46647 | 0.15226 | 3.0637  | 0.00219  | 0.0202   | 10109.4 | 9988.59 | 7769.73 | 12732.2 | 14423.1 | 11350.4 | Up   |
| Rab20    | 1159.78 | 0.44235 | 0.11941 | 3.70445 | 0.00021  | 0.00335  | 931.231 | 1098.88 | 920.048 | 1320.53 | 1329.08 | 1358.91 | Up   |
| E230013L | 98.5946 | 0.67761 | 0.29222 | 2.31882 | 0.0204   | 0.10369  | 65.6073 | 99.6294 | 62.3761 | 102.991 | 127.757 | 133.207 | Up   |
| Tubgcp3  | 4239.78 | -0.228  | 0.1023  | -2.2289 | 0.02582  | 0.1215   | 4749.18 | 4230.8  | 4742.54 | 3795.38 | 3760.59 | 4160.22 | Down |
| 4931415C | 40.3079 | -0.8789 | 0.43047 | -2.0418 | 0.04117  | 0.16792  | 69.5241 | 32.5522 | 54.5791 | 32.6309 | 24.2727 | 27.8342 | Down |
| Atp11a   | 3955.67 | 0.87106 | 0.15601 | 5.58326 | 2.36E-08 | 1.55E-06 | 2800.55 | 2982.96 | 2606.15 | 4365.4  | 4816.65 | 6162.29 | Up   |
| F7       | 3597.78 | 1.32796 | 0.18045 | 7.35905 | 1.85E-13 | 3.53E-11 | 2173.85 | 2351.65 | 1623.73 | 4908.91 | 6001.49 | 4527.03 | Up   |
| F10      | 1107.72 | 0.94017 | 0.16623 | 5.65598 | 1.55E-08 | 1.09E-06 | 923.398 | 729.958 | 623.761 | 1443.92 | 1490.84 | 1434.46 | Up   |
| Proz     | 1346.37 | 0.67087 | 0.29164 | 2.30036 | 0.02143  | 0.10699  | 1105.53 | 1099.87 | 911.277 | 1569.34 | 973.632 | 2418.59 | Up   |
| Gm17023  | 32.8737 | 1.16581 | 0.51831 | 2.24927 | 0.0245   | 0.11694  | 23.5011 | 25.6472 | 11.6955 | 49.966  | 26.7878 | 59.6447 | Up   |
| Pcid2    | 446.321 | 0.32029 | 0.16017 | 1.99968 | 0.04553  | 0.1794   | 409.311 | 417.26  | 364.511 | 470.089 | 447.15  | 569.607 | Up   |
| Lamp1    | 13836.6 | 0.32015 | 0.10113 | 3.16567 | 0.00155  | 0.01538  | 13037.2 | 12761.4 | 11124.4 | 14875.6 | 15276.5 | 15494.7 | Up   |
| Adprhl1  | 43.6768 | -2.1332 | 0.52478 | -4.065  | 4.80E-05 | 0.00101  | 110.651 | 36.4979 | 66.2747 | 19.3746 | 12.3636 | 16.8993 | Down |
| Tmem255  | 29.5589 | -1.2349 | 0.53557 | -2.3057 | 0.02112  | 0.10618  | 65.6073 | 29.5929 | 29.2388 | 18.3549 | 21.6363 | 12.923  | Down |
| Cfap97d2 | 786.636 | -1.1039 | 0.30431 | -3.6277 | 0.00029  | 0.0042   | 1241.64 | 664.854 | 1314.77 | 533.311 | 338.968 | 626.269 | Down |
| Cln8     | 1403.51 | 0.41034 | 0.1365  | 3.00602 | 0.00265  | 0.02336  | 1306.27 | 1179.77 | 1129.59 | 1527.53 | 1821.57 | 1456.33 | Up   |
| Kbtbd11  | 2914.96 | -0.4807 | 0.17371 | -2.7673 | 0.00565  | 0.04091  | 3508.52 | 2933.64 | 3746.47 | 2439.16 | 1978.17 | 2883.82 | Down |
| Myom2    | 258.332 | -2.1529 | 0.41602 | -5.175  | 2.28E-07 | 1.13E-05 | 661.948 | 270.282 | 333.323 | 78.518  | 60.7876 | 145.135 | Down |
| Atp7b    | 3416.85 | -0.8146 | 0.28094 | -2.8995 | 0.00374  | 0.03022  | 4657.14 | 2759.04 | 5653.81 | 2601.29 | 1770.05 | 3059.77 | Down |
| Nek5     | 2975.8  | -0.9988 | 0.29458 | -3.3906 | 0.0007   | 0.0083   | 4374.14 | 2587.4  | 4938.44 | 2200.54 | 1262.12 | 2292.15 | Down |
| Vdac3    | 5897.46 | -0.207  | 0.08406 | -2.4629 | 0.01378  | 0.07837  | 6393.28 | 6061.61 | 6504.66 | 5699.19 | 5342.1  | 5383.93 | Down |
| Polb     | 1925.86 | -0.2382 | 0.08618 | -2.764  | 0.00571  | 0.04124  | 2119.02 | 2123.78 | 2010.66 | 1751.87 | 1780.36 | 1769.46 | Down |
| Ikbb     | 4249.07 | 0.29599 | 0.07807 | 3.79135 | 0.00015  | 0.00256  | 3784.66 | 3810.58 | 3848.8  | 4703.94 | 4810.46 | 4535.98 | Up   |
| Adam5    | 132.742 | -0.7648 | 0.25721 | -2.9733 | 0.00295  | 0.02533  | 173.321 | 129.222 | 198.824 | 110.129 | 86.5451 | 98.4138 | Down |
| Adam9    | 11644.4 | 0.43684 | 0.12893 | 3.38817 | 0.0007   | 0.00834  | 9416.11 | 10818.2 | 9449.99 | 12189.7 | 15240.2 | 12752   | Up   |
| Plekha2  | 1447.33 | 0.28426 | 0.12989 | 2.18837 | 0.02864  | 0.13089  | 1490.36 | 1166.95 | 1258.24 | 1590.76 | 1628.9  | 1548.77 | Up   |
| Gm31045  | 18.6244 | -1.3493 | 0.64138 | -2.1037 | 0.0354   | 0.15181  | 23.5011 | 16.7693 | 39.9597 | 16.3154 | 8.24239 | 6.95855 | Down |
| Adgra2   | 1955.22 | 0.37024 | 0.09783 | 3.78466 | 0.00015  | 0.00262  | 1608.85 | 1754.86 | 1753.35 | 2131.2  | 2311.99 | 2171.07 | Up   |
| Got1l1   | 143.564 | -1.4926 | 0.2597  | -5.7473 | 9.07E-09 | 6.73E-07 | 209.552 | 174.598 | 251.454 | 79.5378 | 59.7573 | 86.4848 | Down |
| Adrb3    | 521.606 | -0.6831 | 0.21381 | -3.1949 | 0.0014   | 0.0142   | 723.638 | 659.921 | 544.817 | 382.393 | 501.755 | 317.111 | Down |
| Nudc-ps1 | 662.882 | -1.2562 | 0.35288 | -3.5597 | 0.00037  | 0.0051   | 886.188 | 1096.91 | 820.636 | 266.146 | 249.332 | 658.08  | Down |
| Gm3985   | 10.1572 | -3.1811 | 1.33087 | -2.3902 | 0.01684  | 0.09099  | 42.1061 | 10.8507 | 1.94925 | 0       | 2.0606  | 3.97631 | Down |
| Tex15    | 799.475 | -0.6427 | 0.22494 | -2.8572 | 0.00427  | 0.03332  | 867.582 | 1307.02 | 749.488 | 629.164 | 565.634 | 677.962 | Down |
| Gtf2e2   | 1569.34 | -0.3553 | 0.16287 | -2.1818 | 0.02913  | 0.13237  | 1913.38 | 1670.03 | 1701.7  | 1360.3  | 1135.39 | 1635.26 | Down |
| Gm29243  | 7.55744 | 2.05055 | 0.99897 | 2.05265 | 0.04011  | NA       | 6.85449 | 0.98643 | 0.97463 | 12.2366 | 12.3636 | 11.9289 | Up   |
| Gm45627  | 21.6218 | 2.40621 | 0.89202 | 2.69748 | 0.00699  | 0.04746  | 0       | 9.8643  | 10.7209 | 42.828  | 48.424  | 17.8934 | Up   |
| Mfhas1   | 1992.3  | 0.33528 | 0.11591 | 2.89256 | 0.00382  | 0.03075  | 1593.18 | 1904.8  | 1787.47 | 2290.28 | 2294.47 | 2083.59 | Up   |
| Lonrf1   | 901.24  | 0.35156 | 0.172   | 2.04399 | 0.04095  | 0.16728  | 843.102 | 628.356 | 904.454 | 1022.77 | 925.208 | 1083.55 | Up   |
| Trmt9b   | 178.28  | -1.2156 | 0.44119 | -2.7552 | 0.00587  | 0.04202  | 331.953 | 298.888 | 116.955 | 91.7743 | 70.0603 | 160.047 | Down |
| Dlc1     | 8935.05 | 0.4592  | 0.1828  | 2.51201 | 0.012    | 0.0706   | 6212.13 | 9511.15 | 6851.63 | 9750.51 | 11641.3 | 9643.56 | Up   |
| Tusc3    | 5857.52 | -0.3521 | 0.16407 | -2.1463 | 0.03185  | 0.14068  | 8048.15 | 5787.38 | 5871.15 | 5140.38 | 4677.55 | 5620.52 | Down |
| Msr1     | 962.09  | 1.61667 | 0.24503 | 6.59779 | 4.17E-11 | 5.03E-09 | 490.586 | 580.021 | 348.917 | 1070.7  | 1749.45 | 1532.87 | Up   |
| Slc7a2   | 3704.26 | 0.77696 | 0.16757 | 4.63672 | 3.54E-06 | 0.00012  | 2332.48 | 2656.45 | 3201.65 | 4268.53 | 5475.01 | 4291.44 | Up   |
| Fgl1     | 489.644 | 2.09934 | 0.27808 | 7.54948 | 4.37E-14 | 9.43E-12 | 182.134 | 113.439 | 260.225 | 773.964 | 867.511 | 740.589 | Up   |
| Asah1    | 13826.6 | 0.55149 | 0.2363  | 2.33389 | 0.0196   | 0.10077  | 7437.12 | 12631.2 | 13578.5 | 17275   | 18739.1 | 13298.8 | Up   |
| F11      | 134.502 | -0.9939 | 0.37356 | -2.6605 | 0.0078   | 0.05144  | 151.778 | 128.236 | 257.302 | 83.6166 | 61.8179 | 124.26  | Down |
| Klkb1    | 197.548 | -1.1458 | 0.30197 | -3.7943 | 0.00015  | 0.00254  | 303.556 | 174.598 | 338.196 | 143.78  | 98.9087 | 126.248 | Down |
| Cyp4v3   | 2144.04 | 0.38285 | 0.14754 | 2.59486 | 0.00946  | 0.0593   | 1903.59 | 2038.95 | 1641.27 | 2266.83 | 2218.23 | 2795.35 | Up   |
| Fam149a  | 3308.21 | -0.6272 | 0.20543 | -3.0533 | 0.00226  | 0.02079  | 4438.77 | 3193.07 | 4417.01 | 2716.52 | 1983.32 | 3100.53 | Down |
| Tlr3     | 2171.5  | 0.26014 | 0.11956 | 2.17587 | 0.02956  | 0.13368  | 1859.53 | 2213.55 | 1855.69 | 2259.69 | 2498.47 | 2342.05 | Up   |
| Sorbs2   | 1984.18 | -1.0023 | 0.26427 | -3.7928 | 0.00015  | 0.00255  | 2741.8  | 1926.5  | 3272.8  | 1375.6  | 899.451 | 1688.94 | Down |
| Ccdc110  | 101.206 | -0.7809 | 0.30829 | -2.533  | 0.01131  | 0.06763  | 119.464 | 98.643  | 165.687 | 90.7546 | 70.0603 | 62.6269 | Down |
| 1700029J | 1356.12 | -0.8779 | 0.22226 | -3.95   | 7.81E-05 | 0.00151  | 1717.54 | 1333.65 | 2218.25 | 1048.27 | 758.3   | 1060.68 | Down |
| Ufsp2    | 2164.74 | 0.20236 | 0.10065 | 2.01054 | 0.04437  | 0.17627  | 1882.05 | 2178.04 | 1979.47 | 2313.73 | 2311.99 | 2323.16 | Up   |
| Ankrd37  | 575.005 | 0.67344 | 0.30439 | 2.21242 | 0.02694  | 0.12526  | 297.681 | 382.735 | 649.102 | 905.507 | 600.664 | 614.341 | Up   |
| Lrp2bp   | 253.393 | -0.5415 | 0.1865  | -2.9034 | 0.00369  | 0.02997  | 324.119 | 256.472 | 320.652 | 205.982 | 186.484 | 226.65  | Down |
| Slc25a4  | 9606.06 | -0.2235 | 0.08505 | -2.6281 | 0.00859  | 0.05534  | 10438.4 | 10185.9 | 10421.7 | 8860.3  | 9352.02 | 8378.09 | Down |
| Stox2    | 1431.18 | -0.7362 | 0.15613 | -4.7155 | 2.41E-06 | 8.50E-05 | 1817.42 | 1721.32 | 1827.43 | 1049.29 | 893.269 | 1278.38 | Down |
| Wwc2     | 6462.35 | 0.28478 | 0.08365 | 3.40442 | 0.00066  | 0.00801  | 5523.74 | 6048.79 | 5907.22 | 7067.64 | 7252.27 | 6974.45 | Up   |
| Dctd     | 47.863  | 0.92868 | 0.36378 | 2.55286 | 0.01068  | 0.06502  | 35.2517 | 26.6336 | 37.0358 | 67.3012 | 47.3937 | 73.5618 | Up   |
| Gm9892   | 745.685 | 0.36986 | 0.12252 | 3.01873 | 0.00254  | 0.02267  | 619.842 | 706.284 | 625.711 | 877.975 | 851.027 | 793.275 | Up   |
| Aga      | 1536.68 | 0.49666 | 0.14153 | 3.50919 | 0.00045  | 0.00593  | 1308.23 | 1252.77 | 1263.12 | 1961.93 | 1936.96 | 1497.08 | Up   |
| Spcs3    | 5198.12 | 0.2025  | 0.09783 | 2.06985 | 0.03847  | 0.16079  | 4583.69 | 5145.22 | 4772.75 | 5520.74 | 5876.82 | 5289.49 | Up   |
| Cep44    | 1026    | -0.2319 | 0.11692 | -1.983  | 0.04737  | 0.1844   | 1101.61 | 1075.21 | 1148.11 | 979.946 | 853.087 | 998.055 | Down |
| Hmgb2    | 1609.52 | 0.39746 | 0.12935 | 3.07281 | 0.00212  | 0.01971  | 1258.29 | 1462.88 | 1446.35 | 1984.37 | 1869.99 | 1635.26 | Up   |
| Galnt7   | 1103.8  | 0.52157 | 0.16923 | 3.08197 | 0.00206  | 0.01918  | 1039.92 | 733.90  |         |         |         |         |      |

|          |         |         |         |         |          |          |         |         |         |         |         |         |      |
|----------|---------|---------|---------|---------|----------|----------|---------|---------|---------|---------|---------|---------|------|
| Marchf1  | 972.563 | 0.89154 | 0.12559 | 7.09859 | 1.26E-12 | 2.05E-10 | 673.698 | 709.243 | 660.797 | 1201.22 | 1409.45 | 1180.97 | Up   |
| Npy1r    | 763.272 | 0.73047 | 0.17717 | 4.12307 | 3.74E-05 | 0.00082  | 486.669 | 636.247 | 599.396 | 881.034 | 849.996 | 1126.29 | Up   |
| Naf1     | 1502.07 | -0.4707 | 0.17917 | -2.6274 | 0.0086   | 0.05541  | 2111.18 | 1395.8  | 1728.01 | 1237.93 | 1148.78 | 1390.72 | Down |
| Sh2d4a   | 3054.06 | 0.63232 | 0.13952 | 4.53199 | 5.84E-06 | 0.00018  | 2058.31 | 2689.01 | 2438.52 | 3879    | 3896.59 | 3362.97 | Up   |
| Ints10   | 1827.41 | -0.4057 | 0.12607 | -3.2182 | 0.00129  | 0.01339  | 2118.04 | 2013.3  | 2116.89 | 1531.61 | 1402.24 | 1782.38 | Down |
| Lpl      | 9136.64 | 1.17668 | 0.24811 | 4.74263 | 2.11E-06 | 7.54E-05 | 6260.11 | 4605.64 | 5947.18 | 15112.2 | 14933.1 | 7961.57 | Up   |
| Gm33103  | 4.55505 | 3.05012 | 1.31207 | 2.32465 | 0.02009  | NA       | 0       | 1.97286 | 0.97463 | 12.2366 | 6.18179 | 5.96447 | Up   |
| Slc18a1  | 262.005 | 0.45768 | 0.17276 | 2.64916 | 0.00807  | 0.05284  | 219.344 | 216.028 | 227.088 | 285.52  | 276.12  | 347.927 | Up   |
| Atp6v1b2 | 13685.6 | 0.20682 | 0.10411 | 1.98659 | 0.04697  | 0.18332  | 12542.7 | 13851.4 | 11724.8 | 14289.3 | 15450.4 | 14255.1 | Up   |
| Zfp930   | 1012.34 | -0.3997 | 0.14716 | -2.7159 | 0.00661  | 0.04576  | 1177.99 | 1183.72 | 1093.53 | 783.141 | 808.784 | 1026.88 | Down |
| Gm3365   | 206.28  | 0.44006 | 0.20662 | 2.1298  | 0.03319  | 0.14524  | 144.923 | 172.625 | 207.596 | 224.337 | 257.575 | 230.626 | Up   |
| Zfp868   | 2099.09 | -1.1178 | 0.2887  | -3.8717 | 0.00011  | 0.00198  | 2970.93 | 3012.56 | 2638.32 | 913.665 | 997.329 | 2061.72 | Down |
| Zfp869   | 2252.07 | 0.30044 | 0.09858 | 3.04754 | 0.00231  | 0.0211   | 2042.64 | 2035    | 1977.52 | 2661.46 | 2470.66 | 2325.15 | Up   |
| Zfp963   | 380.188 | -0.6807 | 0.20053 | -3.3944 | 0.00069  | 0.00822  | 516.045 | 483.351 | 405.445 | 331.407 | 229.757 | 315.123 | Down |
| Gm20422  | 74.0628 | 0.61574 | 0.27321 | 2.25374 | 0.02421  | 0.1162   | 52.8775 | 65.1044 | 57.503  | 101.971 | 82.4239 | 84.4967 | Up   |
| Zfp866   | 34.5704 | 1.93226 | 0.49107 | 3.93477 | 8.33E-05 | 0.00159  | 18.605  | 5.91858 | 18.5179 | 55.0646 | 55.6361 | 53.6802 | Up   |
| Gmip     | 1956.01 | 0.42373 | 0.1369  | 3.09515 | 0.00197  | 0.01856  | 1527.57 | 1917.62 | 1567.2  | 2204.62 | 2430.47 | 2088.56 | Up   |
| Lpar2    | 447.053 | 0.69196 | 0.21792 | 3.17523 | 0.0015   | 0.01499  | 295.722 | 303.82  | 425.912 | 613.868 | 599.634 | 443.359 | Up   |
| Cilp2    | 26.487  | -2.8671 | 0.7745  | -3.7019 | 0.00021  | 0.00337  | 52.8775 | 15.7829 | 71.1478 | 6.11829 | 2.0606  | 10.9349 | Down |
| Tm6sf2   | 578.625 | -1.0499 | 0.3016  | -3.4813 | 0.0005   | 0.00643  | 782.391 | 598.763 | 960.008 | 411.965 | 223.575 | 495.051 | Down |
| Mef2b    | 1236.19 | 0.65982 | 0.17886 | 3.68912 | 0.00023  | 0.00351  | 992.922 | 1058.44 | 823.56  | 1651.94 | 1682.48 | 1207.81 | Up   |
| Arm6c    | 553.067 | -0.7277 | 0.16662 | -4.3673 | 1.26E-05 | 0.00033  | 715.805 | 702.338 | 651.051 | 381.373 | 367.817 | 500.022 | Down |
| Upf1     | 3609.37 | 0.2642  | 0.08389 | 3.14937 | 0.00164  | 0.01603  | 3257.84 | 3157.56 | 3423.87 | 3945.28 | 4002.71 | 3868.95 | Up   |
| Tmem59l  | 375.523 | 0.71886 | 0.2411  | 2.98157 | 0.00287  | 0.02483  | 231.094 | 375.83  | 244.631 | 495.581 | 520.301 | 385.702 | Up   |
| Crlf1    | 1987.45 | -0.3658 | 0.15709 | -2.3285 | 0.01988  | 0.10187  | 2009.34 | 2638.7  | 2066.21 | 1929.3  | 1546.48 | 1734.67 | Down |
| Rex1bd   | 1834.97 | -0.3377 | 0.10467 | -3.226  | 0.00126  | 0.01314  | 2081.81 | 2123.78 | 1940.48 | 1698.85 | 1660.84 | 1504.04 | Down |
| Isyna1   | 4784.59 | -0.2674 | 0.11617 | -2.3023 | 0.02132  | 0.1067   | 4832.41 | 5829.8  | 5018.36 | 4409.25 | 4022.77 | 4544.93 | Down |
| Lsm4     | 1506.65 | 0.2942  | 0.14942 | 1.96893 | 0.04896  | 0.18839  | 1440.42 | 1327.73 | 1292.36 | 1700.88 | 1894.72 | 1383.76 | Up   |
| Gm3336   | 71.4723 | 1.42038 | 0.2987  | 4.75515 | 1.98E-06 | 7.13E-05 | 37.2101 | 42.4165 | 37.0358 | 120.326 | 84.4845 | 107.36  | Up   |
| Pde4c    | 601.233 | -1.0192 | 0.24962 | -4.0828 | 4.45E-05 | 0.00095  | 956.691 | 733.904 | 725.123 | 303.875 | 342.059 | 545.749 | Down |
| Rab3a    | 1493.98 | -0.3552 | 0.15577 | -2.2802 | 0.0226   | 0.11061  | 1817.42 | 1640.43 | 1573.05 | 1544.87 | 1111.69 | 1276.4  | Down |
| Ifi30    | 5525.79 | 0.54005 | 0.12028 | 4.49014 | 7.12E-06 | 0.00021  | 4113.67 | 4822.65 | 4573.93 | 7022.78 | 6755.67 | 5866.06 | Up   |
| Pik3r2   | 2887.33 | -0.2312 | 0.1009  | -2.2918 | 0.02192  | 0.10853  | 3122.71 | 3029.33 | 3202.63 | 2888.85 | 2537.63 | 2542.85 | Down |
| 2010320M | 565.038 | -0.366  | 0.12359 | -2.9612 | 0.00306  | 0.02615  | 594.382 | 633.288 | 681.264 | 503.739 | 491.452 | 486.104 | Down |
| Gm10654  | 3.57382 | 5.3082  | 1.78305 | 2.97704 | 0.00291  | NA       | 0       | 0       | 0       | 8.15772 | 10.303  | 2.98224 | Up   |
| Haus8    | 530.27  | 0.9127  | 0.21659 | 4.21387 | 2.51E-05 | 0.00059  | 312.369 | 399.504 | 391.8   | 799.456 | 766.542 | 511.95  | Up   |
| Myo9b    | 4261.12 | 0.29859 | 0.09246 | 3.2292  | 0.00124  | 0.01308  | 3574.13 | 3863.84 | 4027.16 | 4689.67 | 4835.19 | 4576.74 | Up   |
| Ocel1    | 1015.08 | -0.7501 | 0.15597 | -4.8088 | 1.52E-06 | 5.73E-05 | 1326.83 | 1362.26 | 1130.57 | 675.051 | 713.997 | 881.748 | Down |
| Abhd8    | 1126.09 | -0.373  | 0.111   | -3.3604 | 0.00078  | 0.00899  | 1217.16 | 1380.02 | 1215.36 | 988.104 | 1005.57 | 950.339 | Down |
| Plvap    | 6735.27 | -0.4306 | 0.17382 | -2.4772 | 0.01324  | 0.07595  | 8191.11 | 9000.18 | 6007.6  | 6222.3  | 5877.85 | 5112.55 | Down |
| Ccdc194  | 294.331 | -2.1933 | 1.06054 | -2.0681 | 0.03863  | 0.16129  | 466.105 | 298.888 | 684.188 | 26.5126 | 28.8484 | 261.443 | Down |
| Tmem221  | 329.992 | 2.87726 | 0.30065 | 9.56998 | 1.07E-21 | 8.43E-19 | 97.9213 | 71.0229 | 68.2239 | 740.313 | 634.664 | 367.809 | Up   |
| Fam129c  | 422.134 | -1.013  | 0.24732 | -4.0961 | 4.20E-05 | 0.0009   | 441.625 | 626.383 | 625.711 | 205.982 | 279.211 | 353.892 | Down |
| Colgalt1 | 5318.84 | 0.80439 | 0.11678 | 6.88787 | 5.66E-12 | 7.71E-10 | 3715.13 | 4029.56 | 3875.12 | 7218.56 | 7141    | 5933.65 | Up   |
| Unc13a   | 516.332 | -0.3727 | 0.18081 | -2.0613 | 0.03928  | 0.16306  | 587.528 | 636.247 | 524.349 | 378.314 | 433.756 | 537.796 | Down |
| Jak3     | 3262.44 | 0.49504 | 0.13293 | 3.72413 | 0.0002   | 0.00314  | 2539.1  | 3074.7  | 2510.64 | 3472.13 | 4144.89 | 3833.17 | Up   |
| B3gnt3   | 1933.11 | 1.60757 | 0.23261 | 6.91112 | 4.81E-12 | 6.64E-10 | 1031.11 | 672.745 | 1161.76 | 3074.44 | 3374.23 | 2284.39 | Up   |
| Gm18860  | 57.6406 | 4.70939 | 1.47603 | 3.19058 | 0.00142  | 0.01433  | 7.8337  | 1.97286 | 2.92388 | 160.095 | 171.03  | 1.98816 | Up   |
| Gm5373   | 24.7622 | 2.27453 | 0.59569 | 3.81832 | 0.00013  | 0.00236  | 5.87528 | 6.90501 | 12.6702 | 31.6112 | 29.8787 | 61.6329 | Up   |
| Zfp617   | 920.354 | 0.48078 | 0.1129  | 4.25849 | 2.06E-05 | 0.0005   | 701.116 | 802.954 | 801.144 | 1074.78 | 1071.51 | 1070.62 | Up   |
| Cyp4f18  | 301.802 | 1.11239 | 0.22393 | 4.96749 | 6.78E-07 | 2.87E-05 | 196.822 | 222.933 | 153.016 | 361.999 | 375.029 | 501.016 | Up   |
| Tpm4     | 3740.3  | 0.42569 | 0.11606 | 3.66802 | 0.00024  | 0.00375  | 3466.41 | 3017.49 | 3093.47 | 3874.92 | 4498.28 | 4491.25 | Up   |
| Cib3     | 97.2298 | -1.5439 | 0.42751 | -3.6114 | 0.0003   | 0.00442  | 188.009 | 66.0908 | 180.306 | 54.0449 | 42.2422 | 52.6862 | Down |
| Ap1m1    | 3934.47 | -0.2088 | 0.07893 | -2.6457 | 0.00815  | 0.05324  | 4274.26 | 4237.7  | 4144.12 | 3765.81 | 3611.2  | 3573.71 | Down |
| Calr3    | 184.132 | -1.4284 | 0.34798 | -4.1047 | 4.05E-05 | 0.00088  | 330.974 | 159.802 | 314.805 | 93.8138 | 74.1815 | 131.218 | Down |
| Slc35e1  | 2845.41 | 0.24372 | 0.11744 | 2.07532 | 0.03796  | 0.1593   | 2721.23 | 2796.53 | 2299.15 | 3071.38 | 3223.8  | 2960.37 | Up   |
| Large1   | 2137.7  | 0.4358  | 0.14093 | 3.09233 | 0.00199  | 0.01871  | 1700.89 | 2076.43 | 1674.41 | 2349.42 | 2741.62 | 2283.4  | Up   |
| Hmgxb4   | 288.797 | 0.57967 | 0.20408 | 2.84045 | 0.00451  | 0.03462  | 259.491 | 206.164 | 229.037 | 286.54  | 339.998 | 411.549 | Up   |
| Hmox1    | 3608.72 | 0.74583 | 0.16762 | 4.44944 | 8.61E-06 | 0.00025  | 2394.18 | 2968.17 | 2726.03 | 4546.91 | 5337.98 | 3679.08 | Up   |
| Mcm5     | 729.253 | 0.34803 | 0.17232 | 2.01965 | 0.04342  | 0.17393  | 538.567 | 629.342 | 757.285 | 838.206 | 727.391 | 884.73  | Up   |
| Rasd2    | 934.757 | 1.11641 | 0.26618 | 4.1942  | 2.74E-05 | 0.00064  | 377.976 | 697.406 | 694.909 | 1246.09 | 1572.24 | 1019.92 | Up   |
| Ttc29    | 1944.65 | -1.1924 | 0.28851 | -4.1329 | 3.58E-05 | 0.0008   | 3454.66 | 1806.15 | 2855.66 | 1114.55 | 831.451 | 1605.44 | Down |
| Slc10a7  | 1603.67 | 0.23218 | 0.10835 | 2.14297 | 0.03212  | 0.14173  | 1450.21 | 1455.97 | 1518.47 | 1590.76 | 1868.96 | 1737.65 | Up   |
| Smad1    | 2049.72 | 0.28587 | 0.08914 | 3.20715 | 0.00134  | 0.0138   | 1868.34 | 1899.86 | 1773.82 | 2213.8  | 2221.32 | 2321.17 | Up   |
| Hhip     | 2255.11 | 0.70714 | 0.17005 | 4.15831 | 3.21E-05 | 0.00073  | 1344.46 | 1874.22 | 1920.99 | 2810.33 | 3050.71 | 2529.93 | Up   |
| Ucp1     | 27.7141 | -3.0998 | 0.99953 | -3.1013 | 0.00193  | 0.01824  | 120.443 | 14.7964 | 13.6448 | 4.07886 | 11.3333 | 1.98816 | Down |
| Pkn1     | 1389.43 | 0.47999 | 0.12541 | 3.82751 | 0.00013  | 0.0023   | 1108.47 | 1262.63 | 1110.1  | 1483.69 | 1775.2  | 1596.49 | Up   |
| Adgre5   | 7975.76 | 0.23968 | 0.0982  | 2.44082 | 0.01465  | 0.08216  | 7685.84 | 7387.37 | 6871.12 | 8047.59 | 8908.99 | 8953.67 | Up   |
| 1700067K | 40.8647 | -1.1041 | 0.4466  | -2.4723 | 0.01343  | 0.07676  | 56.7943 | 38.4708 | 72.1224 | 25.4929 | 17.5151 | 34.7927 | Down |
| Gm10643  | 202.913 | -0.7386 | 0.20943 | -3.5264 | 0.00042  | 0.00564  | 302.577 | 214.055 | 244.631 | 142.76  | 150.424 | 163.029 | Down |
| Gm26887  | 86.1008 | -0.885  | 0.26409 | -3.3511 | 0.0008   | 0.00926  | 123.381 | 105.548 | 106.234 | 49.966  | 63.8785 | 67.5973 | Down |
| Mir27a   | 39.1237 | 1.24824 | 0.52375 | 2.38328 | 0.01716  | 0.09232  | 17.6258 | 18.7422 | 33.1373 | 45.8872 | 86.5451 | 32.8046 | Up   |
| Cacna1a  | 520.285 | -0.3412 | 0.16931 | -2.0152 | 0.04388  | 0.1751   | 644.322 | 474.473 | 625.711 | 437.458 | 490.422 | 449.323 | Down |
| Gcdh     | 914.776 | -0.2606 | 0.10922 | -2.3861 | 0.01703  | 0.09178  | 980.192 | 945.986 | 1065.27 | 844.324 | 840.724 | 812.162 | Down |
| Dnase2a  | 1334.44 | 0.55813 | 0.19006 | 2.93659 | 0.00332  | 0.02767  | 1010.55 | 1291.24 | 936.617 | 1663.15 | 1279.38 | 1279.38 | Up   |
| Junb     | 10274.6 | 0.61418 | 0.27305 | 2.24929 | 0.02449  | 0.11694  | 6323.76 | 10571.6 | 7464.67 | 12813.7 | 16419.9 | 8054.02 | Up   |
| Tnpo2    | 677.199 | 0.38462 | 0.17171 | 2.23996 | 0.02509  | 0.1190   |         |         |         |         |         |         |      |

|           |         |         |         |         |          |          |         |         |         |         |         |         |      |
|-----------|---------|---------|---------|---------|----------|----------|---------|---------|---------|---------|---------|---------|------|
| Nkd1      | 8517.64 | -0.256  | 0.11868 | -2.1573 | 0.03098  | 0.13798  | 8848.17 | 10514.4 | 8451.97 | 7938.48 | 7417.12 | 7935.73 | Down |
| Snx20     | 631.829 | 0.61452 | 0.2134  | 2.87973 | 0.00398  | 0.03159  | 409.311 | 635.261 | 453.202 | 713.8   | 899.451 | 679.95  | Up   |
| Cyld      | 3009.96 | 0.25977 | 0.10425 | 2.49168 | 0.01271  | 0.07365  | 2582.18 | 2912.93 | 2724.08 | 3047.93 | 3367.02 | 3425.59 | Up   |
| Sall1     | 14.0003 | -1.8373 | 0.81078 | -2.2661 | 0.02345  | 0.11356  | 28.3972 | 13.81   | 23.3911 | 10.1971 | 7.21209 | 0.99408 | Down |
| Tox3      | 823.058 | 0.29909 | 0.10538 | 2.83824 | 0.00454  | 0.03483  | 725.597 | 762.51  | 726.097 | 874.915 | 911.814 | 937.416 | Up   |
| Gm19935   | 5784.9  | -1.2373 | 0.3108  | -3.9811 | 6.86E-05 | 0.00136  | 10318.9 | 5119.57 | 8933.43 | 3576.14 | 2137.87 | 4623.46 | Down |
| Rbl2      | 660.024 | 0.33851 | 0.15288 | 2.21418 | 0.02682  | 0.12496  | 614.946 | 529.713 | 604.269 | 674.032 | 688.239 | 848.943 | Up   |
| Fto       | 3769.66 | -0.2922 | 0.10687 | -2.7341 | 0.00625  | 0.04409  | 4600.34 | 3854.97 | 3995    | 3408.91 | 3365.99 | 3392.79 | Down |
| Gm45332   | 283.226 | -1.6994 | 0.42626 | -3.9867 | 6.70E-05 | 0.00133  | 447.5   | 654.989 | 196.875 | 129.504 | 87.5754 | 182.91  | Down |
| Irx5      | 2745.12 | -0.2045 | 0.09996 | -2.0455 | 0.04081  | 0.16685  | 2785.86 | 3191.1  | 2841.04 | 2609.45 | 2526.29 | 2517.01 | Down |
| Ces1b     | 195.968 | -1.0896 | 0.49466 | -2.2028 | 0.02761  | 0.12744  | 221.302 | 144.019 | 434.684 | 117.267 | 58.727  | 199.81  | Down |
| Ces1d     | 39882.8 | -0.4191 | 0.19722 | -2.1251 | 0.03358  | 0.14635  | 40476.7 | 39048.8 | 57381.2 | 35047.6 | 27671.8 | 39670.7 | Down |
| Ces1e     | 823.676 | -0.7312 | 0.25065 | -2.9174 | 0.00353  | 0.02899  | 1025.24 | 786.184 | 1272.86 | 632.223 | 448.18  | 777.369 | Down |
| Ces1f     | 564.319 | -2.1037 | 0.89794 | -2.3428 | 0.01914  | 0.09928  | 1455.11 | 194.327 | 1097.43 | 230.456 | 85.5148 | 323.076 | Down |
| Ces1g     | 446.891 | -0.9707 | 0.39824 | -2.4375 | 0.01479  | 0.08265  | 355.454 | 486.31  | 933.693 | 404.827 | 171.03  | 330.034 | Down |
| Gnao1     | 1317.09 | -0.3615 | 0.11125 | -3.2491 | 0.00116  | 0.01238  | 1544.22 | 1536.86 | 1362.53 | 1124.75 | 1217.81 | 1116.35 | Down |
| Bbs2      | 1664.51 | -0.3887 | 0.13174 | -2.9509 | 0.00317  | 0.02672  | 1968.22 | 1739.08 | 1955.1  | 1503.06 | 1255.93 | 1565.67 | Down |
| C78859    | 17.3233 | -1.2702 | 0.56395 | -2.2524 | 0.0243   | 0.11641  | 17.6258 | 23.6743 | 32.1627 | 10.1971 | 11.3333 | 8.94671 | Down |
| Ap3s1-ps1 | 33.5922 | 0.98769 | 0.44469 | 2.22109 | 0.02635  | 0.12345  | 15.6674 | 18.7422 | 33.1373 | 48.9463 | 44.3028 | 40.7572 | Up   |
| Ccl22     | 452.287 | 0.78077 | 0.27669 | 2.82184 | 0.00477  | 0.03605  | 375.038 | 205.177 | 418.115 | 634.263 | 609.937 | 471.193 | Up   |
| Coq9      | 2187.76 | -0.3088 | 0.08699 | -3.5496 | 0.00039  | 0.00527  | 2440.2  | 2479.88 | 2343    | 1994.56 | 1893.69 | 1975.23 | Down |
| Ccdc102a  | 972.674 | -0.4039 | 0.11291 | -3.5777 | 0.00035  | 0.00486  | 1153.51 | 1044.63 | 1125.69 | 895.31  | 806.724 | 810.174 | Down |
| Adgrg1    | 9402.1  | 0.26081 | 0.06957 | 3.74868 | 0.00018  | 0.00292  | 8467.25 | 8638.16 | 8558.2  | 10217.5 | 10370   | 10161.5 | Up   |
| Drc7      | 3224.57 | -0.974  | 0.31218 | -3.1201 | 0.00181  | 0.0173   | 4947.96 | 2834.01 | 5038.82 | 2311.69 | 1273.45 | 2941.48 | Down |
| Katnb1    | 1453.51 | -0.3364 | 0.13357 | -2.5186 | 0.01178  | 0.06963  | 1678.37 | 1407.64 | 1780.64 | 1343.98 | 1198.24 | 1312.18 | Down |
| Kifc3     | 1689.78 | 0.44664 | 0.12312 | 3.62766 | 0.00029  | 0.0042   | 1297.46 | 1570.4  | 1422.96 | 1925.22 | 2093.57 | 1829.1  | Up   |
| Cfap20    | 3838.67 | -0.498  | 0.10152 | -4.9048 | 9.35E-07 | 3.76E-05 | 4903.9  | 4190.35 | 4389.72 | 3193.75 | 3115.62 | 3238.71 | Down |
| 4933406B  | 452.075 | -1.2483 | 0.24608 | -5.0728 | 3.92E-07 | 1.83E-05 | 582.632 | 475.459 | 850.85  | 234.534 | 264.787 | 304.188 | Down |
| Ccdc113   | 2456.31 | -0.9156 | 0.26717 | -3.4272 | 0.00061  | 0.00754  | 3717.09 | 2272.73 | 3642.18 | 1922.16 | 1120.96 | 2062.71 | Down |
| Slc38a7   | 1172.57 | 0.24714 | 0.12402 | 1.99284 | 0.04628  | 0.18146  | 1076.15 | 1111.71 | 1029.21 | 1174.71 | 1424.9  | 1218.74 | Up   |
| Got2      | 3637.82 | -0.2033 | 0.09587 | -2.1203 | 0.03398  | 0.14764  | 4168.51 | 3676.42 | 3836.13 | 3475.19 | 3263.99 | 3406.71 | Down |
| Gm45895   | 37.3238 | 1.004   | 0.46685 | 2.15057 | 0.03151  | 0.13961  | 12.7298 | 30.5793 | 31.1881 | 46.9069 | 60.7876 | 41.7513 | Up   |
| Bean1     | 22.1124 | -1.1853 | 0.58346 | -2.0315 | 0.04221  | 0.17067  | 32.314  | 33.5386 | 26.3149 | 5.09857 | 17.5151 | 17.8934 | Down |
| Klrf      | 541.513 | 0.35026 | 0.14032 | 2.49606 | 0.01256  | 0.07296  | 471.001 | 505.052 | 452.227 | 550.646 | 670.724 | 599.429 | Up   |
| Cmtm3     | 2910.89 | 0.28862 | 0.14677 | 1.96645 | 0.04925  | 0.18906  | 2724.17 | 2987.9  | 2150.03 | 3268.19 | 3274.29 | 3060.77 | Up   |
| Cdh16     | 326.78  | 0.91415 | 0.32082 | 2.84938 | 0.00438  | 0.03391  | 255.575 | 257.458 | 166.661 | 482.325 | 549.149 | 249.514 | Up   |
| Rad       | 312.113 | 0.87689 | 0.23202 | 3.77943 | 0.00016  | 0.00265  | 217.385 | 274.227 | 168.611 | 410.945 | 460.543 | 340.969 | Up   |
| Ces2c     | 34.7188 | 3.11232 | 0.83301 | 3.73622 | 0.00019  | 0.00303  | 0       | 12.8236 | 8.77165 | 46.9069 | 103.03  | 36.7809 | Up   |
| Fhod1     | 647.3   | 0.63762 | 0.16577 | 3.84639 | 0.00012  | 0.00216  | 606.133 | 426.138 | 487.314 | 765.806 | 818.057 | 780.352 | Up   |
| Slc9a5    | 454.04  | 0.32255 | 0.14844 | 2.17292 | 0.02979  | 0.13443  | 352.517 | 432.056 | 425.912 | 535.35  | 487.331 | 491.075 | Up   |
| Lrrc36    | 3707.56 | -0.8378 | 0.26278 | -3.1883 | 0.00143  | 0.01442  | 5285.79 | 3137.83 | 5840.94 | 3146.84 | 1916.36 | 2917.62 | Down |
| Tppp3     | 27588.1 | -0.5482 | 0.15948 | -3.4374 | 0.00059  | 0.00731  | 37662.5 | 25990.4 | 34649   | 24150.9 | 20875.9 | 22199.8 | Down |
| Zdhhc1    | 9821.2  | -0.4341 | 0.16078 | -2.7    | 0.00693  | 0.04725  | 11620.3 | 9040.63 | 13202.3 | 8695.11 | 7617    | 8751.87 | Down |
| Hsd11b2   | 544.246 | 2.07344 | 0.2902  | 7.14489 | 9.01E-13 | 1.50E-10 | 228.157 | 167.693 | 230.987 | 1031.95 | 1081.81 | 524.873 | Up   |
| Atp6v0d1  | 9970.89 | 0.26432 | 0.11475 | 2.30347 | 0.02125  | 0.1065   | 8956.86 | 9820.89 | 8402.26 | 10928.3 | 11775.3 | 9941.78 | Up   |
| Agrp      | 118.024 | -0.6526 | 0.2988  | -2.1842 | 0.02895  | 0.13187  | 126.318 | 125.277 | 181.281 | 101.971 | 65.9391 | 107.36  | Down |
| Enkd1     | 618.8   | -0.6989 | 0.19717 | -3.5445 | 0.00039  | 0.00535  | 832.331 | 595.803 | 869.368 | 493.542 | 402.847 | 518.909 | Down |
| Gfod2     | 1641.94 | -0.2968 | 0.12559 | -2.363  | 0.01813  | 0.09597  | 1858.55 | 1642.41 | 1929.76 | 1556.08 | 1325.99 | 1538.83 | Down |
| Tsnaxip1  | 1211    | -1.0929 | 0.235   | -4.6506 | 3.31E-06 | 0.00011  | 1813.5  | 1222.19 | 1911.24 | 811.693 | 575.937 | 931.452 | Down |
| Slc12a4   | 1619.85 | 0.49244 | 0.10645 | 4.62583 | 3.73E-06 | 0.00012  | 1334.67 | 1362.26 | 1341.09 | 1867.1  | 2055.45 | 1758.52 | Up   |
| Gm45752   | 51.571  | 1.17309 | 0.32918 | 3.56362 | 0.00037  | 0.00505  | 35.2517 | 27.62   | 32.1627 | 69.3406 | 82.4239 | 62.6269 | Up   |
| 1810019D  | 2699.85 | -0.4314 | 0.11413 | -3.7796 | 0.00016  | 0.00265  | 2972.89 | 3449.54 | 2879.05 | 2406.53 | 2257.38 | 2233.69 | Down |
| Pla2g15   | 3389.75 | 0.97029 | 0.20448 | 4.74508 | 2.08E-06 | 7.47E-05 | 2214    | 2698.87 | 1959.98 | 4321.55 | 5642.94 | 3501.14 | Up   |
| Tango6    | 546.29  | -0.4939 | 0.1368  | -3.6107 | 0.00031  | 0.00442  | 677.615 | 610.6   | 628.635 | 448.675 | 414.18  | 498.033 | Down |
| Cyb5b     | 19587.1 | 0.38609 | 0.12861 | 3.00197 | 0.00268  | 0.02359  | 17011.9 | 19114   | 14819.2 | 20618.6 | 23570.1 | 22388.6 | Up   |
| Nqo1      | 439.428 | -1.1037 | 0.41829 | -2.6386 | 0.00832  | 0.05407  | 376.997 | 354.128 | 1068.19 | 356.9   | 203.999 | 276.354 | Down |
| Nob1      | 1180.87 | -0.3181 | 0.09764 | -3.2577 | 0.00112  | 0.01205  | 1298.44 | 1357.33 | 1275.79 | 1024.81 | 1089.03 | 1039.81 | Down |
| Phlpp2    | 1219.43 | 0.36098 | 0.12887 | 2.80109 | 0.00509  | 0.03792  | 922.418 | 1137.35 | 1143.24 | 1334.81 | 1395.02 | 1383.76 | Up   |
| Hydin     | 3365.78 | -1.0878 | 0.32093 | -3.3895 | 0.0007   | 0.00831  | 5774.42 | 2797.51 | 5161.63 | 2202.58 | 1327.02 | 2931.54 | Down |
| Vac14     | 2311.02 | 0.26626 | 0.11643 | 2.28687 | 0.0222   | 0.10948  | 2015.22 | 2298.38 | 1981.42 | 2493.2  | 2717.93 | 2359.94 | Up   |
| Il34      | 1434.28 | 0.31061 | 0.12956 | 2.39734 | 0.01651  | 0.08972  | 1148.62 | 1375.08 | 1317.7  | 1468.39 | 1740.17 | 1555.73 | Up   |
| Aars      | 5480.94 | 0.29443 | 0.10245 | 2.87393 | 0.00405  | 0.03194  | 5027.28 | 5137.33 | 4606.09 | 6314.07 | 6225.06 | 5575.79 | Up   |
| Glg1      | 4005.45 | 0.28912 | 0.10001 | 2.89091 | 0.00384  | 0.03085  | 3734.72 | 3582.71 | 3498.91 | 4033.99 | 4611.62 | 4570.77 | Up   |
| Mkl       | 664.471 | 0.50686 | 0.13081 | 3.87494 | 0.00011  | 0.00196  | 500.378 | 586.926 | 559.436 | 772.944 | 833.511 | 733.63  | Up   |
| Fa2h      | 14.1562 | 1.64912 | 0.81273 | 2.0291  | 0.04245  | 0.17123  | 7.8337  | 2.95929 | 9.74627 | 19.3746 | 8.24239 | 36.7809 | Up   |
| Ldhd      | 1005.07 | 0.45987 | 0.17429 | 2.63856 | 0.00833  | 0.05407  | 810.788 | 714.175 | 1013.61 | 1301.16 | 1151.87 | 1038.81 | Up   |
| Tmem231   | 1466.96 | -0.6584 | 0.24308 | -2.7087 | 0.00675  | 0.04635  | 2229.67 | 1279.4  | 1879.08 | 1138    | 880.905 | 1394.69 | Down |
| Mon1b     | 530.129 | 0.37701 | 0.12164 | 3.09937 | 0.00194  | 0.01834  | 488.627 | 445.866 | 449.303 | 592.454 | 585.21  | 619.311 | Up   |
| Vat1l     | 6.89511 | -3.1848 | 1.47134 | -2.1646 | 0.03042  | NA       | 25.4595 | 7.89144 | 3.89851 | 0       | 4.12119 | 0       | Down |
| Dynlrb2   | 3658.1  | -0.8116 | 0.24236 | -3.3485 | 0.00081  | 0.00932  | 5364.13 | 3207.87 | 5410.16 | 2993.88 | 1985.39 | 2987.21 | Down |
| 1700030J  | 415.632 | -0.8361 | 0.29667 | -2.8183 | 0.00483  | 0.03637  | 633.551 | 331.44  | 633.508 | 303.875 | 224.605 | 366.815 | Down |
| Cmp       | 1646.15 | 0.32349 | 0.15876 | 2.03755 | 0.04159  | 0.16912  | 1470.78 | 1329.71 | 1586.69 | 1545.89 | 1790.66 | 2153.17 | Up   |
| Plcg2     | 1508.35 | 0.66801 | 0.18189 | 3.67269 | 0.00024  | 0.00369  | 1024.26 | 1368.18 | 1103.28 | 1629.5  | 2240.9  | 1683.97 | Up   |
| Necab2    | 38.6084 | -1.3579 | 0.38052 | -3.5685 | 0.00036  | 0.00498  | 48.9606 | 57.2129 | 60.4269 | 19.3746 | 26.7878 | 18.8875 | Down |
| Dnaaf1    | 1093.3  | -1.309  | 0.27877 | -4.6958 | 2.66E-06 | 9.15E-05 | 1744.96 | 1053.51 | 1875.18 | 729.096 | 422.422 | 734.624 | Down |
| Taf1c     | 509.809 | -0.3214 | 0.1567  | -2.051  | 0.04027  | 0.16559  | 594.382 | 535.631 | 569.182 | 485.384 | 381.21  | 493.063 | Down |
| Atp2c2    | 1626.42 | -1.0627 | 0.35499 | -2.9937 | 0.00276  | 0.02409  | 2727.11 | 1309.98 | 2562.3  | 1093.13 | 574.907 | 14      |      |

|          |         |         |         |         |          |          |         |         |         |         |         |         |      |
|----------|---------|---------|---------|---------|----------|----------|---------|---------|---------|---------|---------|---------|------|
| Slc35f3  | 509.467 | -0.628  | 0.18259 | -3.4391 | 0.00058  | 0.00729  | 611.029 | 512.943 | 731.945 | 369.137 | 387.392 | 444.353 | Down |
| Coa6     | 814.272 | -0.251  | 0.11848 | -2.1182 | 0.03416  | 0.14809  | 937.107 | 842.411 | 875.215 | 798.437 | 706.785 | 725.677 | Down |
| Gm26759  | 101.492 | 1.17107 | 0.4319  | 2.71142 | 0.0067   | 0.04609  | 43.0854 | 73.9822 | 70.1732 | 211.081 | 138.06  | 72.5677 | Up   |
| Gm31718  | 225.933 | 0.35918 | 0.17881 | 2.00873 | 0.04457  | 0.17661  | 191.926 | 195.313 | 206.621 | 219.239 | 275.09  | 267.407 | Up   |
| Itgb1    | 42711.2 | 0.23117 | 0.09535 | 2.42449 | 0.01533  | 0.0848   | 38672   | 42272.5 | 36945.2 | 44179.1 | 48056.2 | 46142.1 | Up   |
| Ccdc7b   | 18.9833 | 1.86995 | 0.68902 | 2.71393 | 0.00665  | 0.04589  | 2.93764 | 5.91858 | 15.594  | 26.5126 | 37.0907 | 25.846  | Up   |
| 2610044C | 806.803 | 0.50511 | 0.13851 | 3.64668 | 0.00027  | 0.00398  | 601.237 | 656.962 | 742.666 | 938.138 | 1022.06 | 879.759 | Up   |
| Gm32856  | 291.624 | 1.20862 | 0.17825 | 6.7805  | 1.20E-11 | 1.58E-09 | 181.154 | 196.299 | 151.067 | 384.433 | 389.453 | 447.335 | Up   |
| Kbtbd3   | 554.932 | -0.3558 | 0.15587 | -2.2825 | 0.02246  | 0.11021  | 669.782 | 525.767 | 673.467 | 514.956 | 459.513 | 486.104 | Down |
| Dync2h1  | 2087.21 | -0.7927 | 0.23948 | -3.3102 | 0.00093  | 0.0104   | 3080.6  | 1868.3  | 2991.13 | 1615.23 | 1149.81 | 1818.17 | Down |
| Mmp13    | 251.437 | 1.421   | 0.47903 | 2.96641 | 0.00301  | 0.02578  | 99.8797 | 194.327 | 115.981 | 440.517 | 532.664 | 125.254 | Up   |
| Mmp12    | 1275.52 | 1.89935 | 0.20965 | 9.05971 | 1.31E-19 | 6.69E-17 | 456.313 | 722.066 | 439.557 | 2132.22 | 1844.23 | 2058.74 | Up   |
| Mmp8     | 623.628 | 1.22379 | 0.3863  | 3.16799 | 0.00153  | 0.01528  | 625.717 | 322.562 | 173.484 | 979.946 | 928.299 | 711.76  | Up   |
| Birc3    | 4446.42 | 0.6269  | 0.13239 | 4.7351  | 2.19E-06 | 7.82E-05 | 3788.57 | 3724.76 | 2972.61 | 5130.19 | 5295.73 | 5766.65 | Up   |
| Cfap300  | 1010.42 | -1.1467 | 0.32086 | -3.5739 | 0.00035  | 0.0049   | 1729.29 | 879.895 | 1567.2  | 659.756 | 386.362 | 839.996 | Down |
| Cep126   | 3630.58 | -0.8102 | 0.29881 | -2.7112 | 0.0067   | 0.0461   | 5680.41 | 2926.74 | 5264.94 | 2775.66 | 1706.17 | 3429.57 | Down |
| Gm19324  | 60.5083 | 1.00823 | 0.29277 | 3.44381 | 0.00057  | 0.00718  | 41.1269 | 40.4436 | 38.9851 | 71.38   | 88.6057 | 82.5085 | Up   |
| Trpc6    | 301.09  | 0.32827 | 0.15442 | 2.1258  | 0.03352  | 0.14625  | 249.699 | 293.956 | 257.302 | 322.23  | 351.332 | 332.022 | Up   |
| Gm32014  | 380.472 | 0.34942 | 0.15254 | 2.29074 | 0.02198  | 0.10868  | 333.912 | 362.02  | 307.982 | 384.433 | 447.15  | 447.335 | Up   |
| Pgr      | 212.918 | 0.69602 | 0.30716 | 2.26597 | 0.02345  | 0.11357  | 109.672 | 225.892 | 152.042 | 210.061 | 319.393 | 260.449 | Up   |
| Cep57    | 2487.23 | -0.2177 | 0.10224 | -2.129  | 0.03325  | 0.1454   | 2696.75 | 2475.94 | 2850.78 | 2391.23 | 2221.32 | 2287.37 | Down |
| Gm47557  | 15.9818 | -1.1836 | 0.59138 | -2.0015 | 0.04534  | 0.17885  | 19.5843 | 20.715  | 26.3149 | 9.17743 | 6.18179 | 13.9171 | Down |
| Sesn3    | 2787.6  | -0.4189 | 0.13098 | -3.1986 | 0.00138  | 0.0141   | 3140.34 | 3566.93 | 2861.51 | 2273.96 | 2622.38 | 2622.38 | Down |
| Endod1   | 4001.91 | -0.2846 | 0.11142 | -2.5541 | 0.01065  | 0.06485  | 4590.55 | 4099.6  | 4495.96 | 3589.4  | 3309.32 | 3926.61 | Down |
| 1700012B | 136.896 | -3.0756 | 0.31011 | -9.9176 | 3.49E-23 | 3.30E-20 | 249.699 | 184.462 | 300.185 | 26.5126 | 24.7272 | 35.7868 | Down |
| 4931406C | 1865.16 | -0.4855 | 0.22216 | -2.1852 | 0.02887  | 0.13173  | 7220.71 | 4768.4  | 7884.73 | 4812.03 | 3759.56 | 5623.5  | Down |
| Mtnr1b   | 1.55717 | 4.36368 | 2.09671 | 2.0812  | 0.03742  | NA       | 0       | 0       | 0       | 2.03943 | 4.12119 | 4.97039 | Up   |
| Fat3     | 814.887 | -0.4281 | 0.12731 | -3.3628 | 0.00077  | 0.00895  | 890.104 | 949.932 | 964.881 | 701.564 | 624.361 | 758.482 | Down |
| Angptl6  | 77.9885 | -0.5656 | 0.25756 | -2.1958 | 0.0281   | 0.12915  | 99.8797 | 83.8465 | 95.5135 | 67.3012 | 59.7573 | 61.6329 | Down |
| Icam1    | 36514.6 | 0.42357 | 0.13724 | 3.08631 | 0.00203  | 0.01897  | 27591.3 | 37078.9 | 28907.4 | 41835.8 | 42424.6 | 41249.3 | Up   |
| Dnm2     | 10306.4 | 0.31647 | 0.09495 | 3.33299 | 0.00086  | 0.00974  | 9077.3  | 9591.06 | 8873.01 | 11247.5 | 12263.6 | 10785.8 | Up   |
| Tmed1    | 847.481 | -0.3253 | 0.11855 | -2.7437 | 0.00608  | 0.0431   | 911.647 | 972.62  | 943.439 | 795.378 | 777.875 | 683.926 | Down |
| Ldlr     | 7954.16 | 0.56659 | 0.13063 | 4.33723 | 1.44E-05 | 0.00037  | 6891.7  | 6648.54 | 5695.72 | 9151.94 | 10638.9 | 8698.19 | Up   |
| Spc24    | 171.626 | -0.5816 | 0.24639 | -2.3605 | 0.01825  | 0.09622  | 165.487 | 211.096 | 240.733 | 158.056 | 110.242 | 144.141 | Down |
| Plppr2   | 607.058 | -0.3705 | 0.14493 | -2.5562 | 0.01058  | 0.06461  | 593.403 | 762.51  | 697.833 | 547.587 | 515.149 | 525.868 | Down |
| Ccdc151  | 1247.54 | -1.0007 | 0.27285 | -3.6674 | 0.00025  | 0.00375  | 1947.65 | 1101.84 | 1941.46 | 1033.99 | 593.452 | 866.836 | Down |
| Elavl3   | 2.93951 | -4.9774 | 1.79071 | -2.7796 | 0.00544  | NA       | 4.89606 | 5.91858 | 6.82239 | 0       | 0       | 0       | Down |
| Elof1    | 9433.62 | -0.9278 | 0.20754 | -4.4706 | 7.80E-06 | 0.00023  | 13196.9 | 9104.75 | 14798.7 | 7087.02 | 5268.95 | 7145.44 | Down |
| Zfp599   | 143.641 | -0.5324 | 0.24501 | -2.1732 | 0.02977  | 0.13438  | 183.113 | 165.72  | 160.814 | 126.445 | 87.5754 | 138.177 | Down |
| Dpy19l2  | 51.042  | -0.825  | 0.3911  | -2.1095 | 0.0349   | 0.15024  | 65.6073 | 43.4029 | 86.7418 | 30.5914 | 39.1513 | 40.7572 | Down |
| Gm48393  | 3.43868 | -1.9321 | 1.60398 | -1.9907 | 0.04651  | NA       | 5.87528 | 3.94572 | 8.77165 | 2.03943 | 0       | 0       | Down |
| B3gat1   | 8.89627 | -1.6026 | 0.78999 | -2.0286 | 0.0425   | 0.1714   | 14.6882 | 8.87787 | 16.5687 | 4.07886 | 6.18179 | 2.98224 | Down |
| Glb1l2   | 2341.3  | -0.6707 | 0.22341 | -3.0021 | 0.00268  | 0.02359  | 2696.75 | 2408.86 | 3522.3  | 2106.73 | 1298.18 | 2015    | Down |
| Glb1l3   | 163.728 | -0.6525 | 0.26726 | -2.4414 | 0.01463  | 0.08212  | 149.82  | 191.367 | 259.251 | 126.445 | 113.333 | 142.153 | Down |
| Jam3     | 854.613 | -1.185  | 0.26084 | -4.5431 | 5.54E-06 | 0.00017  | 1476.65 | 732.917 | 1351.81 | 526.173 | 461.574 | 578.554 | Down |
| Igsf9b   | 314     | -0.9976 | 0.24597 | -4.0559 | 4.99E-05 | 0.00105  | 478.835 | 466.581 | 309.931 | 163.154 | 233.878 | 231.62  | Down |
| Barx2    | 529.448 | -0.7029 | 0.2998  | -2.3446 | 0.01905  | 0.09891  | 745.181 | 363.006 | 859.621 | 406.866 | 361.635 | 440.377 | Down |
| Kcnj5    | 52.7578 | -2.0521 | 0.79909 | -2.5681 | 0.01023  | 0.06298  | 124.36  | 9.8643  | 120.854 | 14.276  | 13.3939 | 33.7987 | Down |
| Gm32171  | 18.3574 | -1.3109 | 0.6535  | -2.006  | 0.04486  | 0.17765  | 20.5635 | 32.5522 | 25.3403 | 10.1971 | 17.5151 | 3.97631 | Down |
| Kirrel3  | 158.413 | 0.58453 | 0.23493 | 2.48811 | 0.01284  | 0.07423  | 119.464 | 134.154 | 126.702 | 214.14  | 145.272 | 210.745 | Up   |
| St3gal4  | 3569.88 | 0.46324 | 0.1213  | 3.81886 | 0.00013  | 0.00236  | 3084.52 | 3228.58 | 2691.92 | 3956.49 | 3934.71 | 4523.06 | Up   |
| 4930581F | 64.0575 | 0.73686 | 0.32529 | 2.26522 | 0.0235   | 0.11362  | 47.9814 | 56.2265 | 39.9597 | 61.1829 | 86.5451 | 92.4493 | Up   |
| Ei24     | 1883.62 | 0.29856 | 0.11417 | 2.61472 | 0.00893  | 0.05694  | 1756.71 | 1698.63 | 1613.01 | 1684.04 | 2187.32 | 2182    | Up   |
| Tmem218  | 556.754 | -0.4549 | 0.17468 | -2.6041 | 0.00921  | 0.05822  | 764.765 | 577.061 | 589.65  | 505.779 | 414.18  | 489.087 | Down |
| Hepacam  | 243.275 | -1.3782 | 0.19126 | -7.2061 | 5.76E-13 | 9.90E-11 | 379.935 | 309.739 | 364.511 | 148.878 | 116.424 | 140.165 | Down |
| Msantd2  | 2314.69 | -0.3069 | 0.14205 | -2.1602 | 0.03075  | 0.13735  | 2793.69 | 2234.26 | 2651.96 | 2029.23 | 1862.78 | 2316.2  | Down |
| Vsig2    | 2175.1  | 0.42232 | 0.13192 | 3.2013  | 0.00137  | 0.01401  | 1809.59 | 1983.71 | 1783.57 | 2518.7  | 2786.96 | 2168.09 | Up   |
| Nrgn     | 1084.2  | -1.1604 | 0.14979 | -7.747  | 9.41E-15 | 2.31E-12 | 1475.67 | 1320.83 | 1697.8  | 654.657 | 743.875 | 612.352 | Down |
| Vwa5a    | 6889.81 | 0.20309 | 0.08628 | 2.35373 | 0.01859  | 0.09738  | 6032.93 | 6459.14 | 6724.93 | 7232.84 | 7457.3  | 7431.73 | Up   |
| Scn3b    | 3849.64 | 0.29241 | 0.12607 | 2.31939 | 0.02037  | 0.10356  | 3644.63 | 3297.63 | 3440.43 | 3837.19 | 4039.8  | 4838.18 | Up   |
| Gramd1b  | 2592.66 | -0.4195 | 0.1954  | -2.147  | 0.0318   | 0.14055  | 2712.42 | 2405.9  | 3782.53 | 2393.27 | 2354.23 | 1907.64 | Down |
| Gm48284  | 6.88132 | -3.1903 | 1.12604 | -2.8332 | 0.00461  | NA       | 9.79213 | 8.87787 | 18.5179 | 2.03943 | 2.0606  | 0       | Down |
| Jhy      | 823.49  | -1.5742 | 0.2931  | -5.3708 | 7.84E-08 | 4.55E-06 | 1554.01 | 699.379 | 1445.37 | 483.345 | 349.271 | 409.56  | Down |
| Crtam    | 36.6896 | -0.8935 | 0.40749 | -2.1928 | 0.02832  | 0.12991  | 33.2932 | 56.2265 | 53.6045 | 26.5126 | 22.6666 | 27.8342 | Down |
| Ubash3b  | 554.882 | 0.60245 | 0.17761 | 3.39202 | 0.00069  | 0.00828  | 400.498 | 535.631 | 385.952 | 614.888 | 724.3   | 668.021 | Up   |
| Sorl1    | 10438.5 | -0.3556 | 0.09617 | -3.6981 | 0.00022  | 0.00341  | 11678.1 | 11379.5 | 12098   | 9520.06 | 9561.17 | 8394    | Down |
| 4930546K | 12.7626 | 3.13296 | 0.7892  | 3.96978 | 7.19E-05 | 0.00141  | 3.91685 | 1.97286 | 1.94925 | 19.3746 | 18.5454 | 30.8164 | Up   |
| Sc5d     | 4255.61 | 0.78917 | 0.11583 | 6.81342 | 9.53E-12 | 1.27E-09 | 3178.52 | 3342.02 | 2839.09 | 4926.24 | 5705.79 | 5541.99 | Up   |
| Grik4    | 75.456  | 1.67733 | 0.35817 | 4.68309 | 2.83E-06 | 9.60E-05 | 30.3556 | 38.4708 | 38.9851 | 90.7546 | 160.727 | 93.4434 | Up   |
| Oaf      | 337.884 | 0.54784 | 0.20021 | 2.73629 | 0.00621  | 0.04389  | 301.598 | 274.227 | 247.555 | 412.985 | 470.846 | 320.093 | Up   |
| D630033C | 4.89579 | 2.7006  | 1.30905 | 2.06302 | 0.03911  | NA       | 0       | 0.98643 | 2.92388 | 14.276  | 7.21209 | 3.97631 | Up   |
| Trim29   | 1058.24 | 1.98874 | 0.21679 | 9.17342 | 4.58E-20 | 2.63E-17 | 421.061 | 494.201 | 362.561 | 1607.07 | 2154.35 | 1310.2  | Up   |
| Cbl      | 3306.49 | 0.26649 | 0.09015 | 2.95608 | 0.00312  | 0.02641  | 3016.95 | 2995.79 | 2993.08 | 3432.36 | 3840.95 | 3559.8  | Up   |
| Ccdc153  | 10234.1 | -0.9664 | 0.27761 | -3.4813 | 0.0005   | 0.00643  | 16371.5 | 8598.71 | 15647.6 | 7788.58 | 4765.13 | 8232.96 | Down |
| Nlrx1    | 823.084 | 0.50649 | 0.19222 | 2.63491 | 0.00842  | 0.0546   | 599.278 | 762.51  | 678.341 | 871.856 | 1204.42 | 822.103 | Up   |
| C2cd2l   | 3336.47 | 0.31418 | 0.10654 | 2.94905 | 0.00319  | 0.02681  | 3283.3  | 2792.58 | 2847.86 | 3810.67 | 3669.92 | 3614.47 | Up   |
| Dpagt1   | 1271.85 | 0.25784 | 0.08967 | 2.87532 | 0.00404  | 0.03188  | 1155.47 | 1172.86 | 1147.14 | 1394.97 | 1387.81 | 1372.82 | Up   |
| H2ax     |         |         |         |         |          |          |         |         |         |         |         |         |      |

|            |         |         |         |         |          |          |         |         |         |         |         |         |      |
|------------|---------|---------|---------|---------|----------|----------|---------|---------|---------|---------|---------|---------|------|
| Tmprss4    | 1920.95 | 0.30363 | 0.11091 | 2.73772 | 0.00619  | 0.04372  | 1627.45 | 1890.99 | 1640.3  | 2023.11 | 2169.81 | 2174.05 | Up   |
| Cep164     | 2247.14 | -0.3121 | 0.15359 | -2.032  | 0.04216  | 0.1706   | 2478.39 | 2058.68 | 2930.7  | 2043.51 | 1900.9  | 2070.67 | Down |
| Rnf214     | 1044.09 | -0.2758 | 0.12532 | -2.2005 | 0.02777  | 0.12807  | 1148.62 | 1018.98 | 1263.12 | 952.414 | 923.147 | 958.292 | Down |
| Sidt2      | 6495.21 | 0.30624 | 0.12545 | 2.4411  | 0.01464  | 0.08216  | 5353.36 | 6526.22 | 5545.63 | 7058.47 | 7830.27 | 6657.34 | Up   |
| Apoa1      | 838247  | -1.9765 | 0.97972 | -2.0174 | 0.04366  | 0.17454  | 10.7713 | 5.91858 | 23.3911 | 5.09857 | 4.12119 | 0.99408 | Down |
| Bud13      | 862.746 | -0.2321 | 0.09976 | -2.3266 | 0.01998  | 0.10219  | 931.231 | 924.285 | 940.515 | 778.042 | 790.239 | 812.162 | Down |
| Gm5617     | 307.473 | -0.6405 | 0.16762 | -3.8211 | 0.00013  | 0.00235  | 391.685 | 336.372 | 395.699 | 233.515 | 267.878 | 219.691 | Down |
| Drd2       | 17.4186 | -2.1467 | 0.58888 | -3.6455 | 0.00027  | 0.00399  | 32.314  | 27.62   | 25.3403 | 8.15772 | 4.12119 | 6.95855 | Down |
| Ankk1      | 154.766 | -1.4161 | 0.33819 | -4.1872 | 2.82E-05 | 0.00065  | 189.967 | 178.544 | 307.008 | 105.031 | 54.6058 | 93.4434 | Down |
| Ttc12      | 2596.6  | -0.7568 | 0.22743 | -3.3274 | 0.00088  | 0.00988  | 3492.85 | 2390.12 | 3904.36 | 2140.38 | 1460.96 | 2190.95 | Down |
| Ncam1      | 123.674 | -0.8152 | 0.25892 | -3.1484 | 0.00164  | 0.01608  | 188.988 | 124.29  | 159.839 | 101.971 | 83.4542 | 83.5026 | Down |
| Il18       | 1481.51 | 0.936   | 0.20357 | 4.59793 | 4.27E-06 | 0.00014  | 1106.51 | 1171.88 | 772.879 | 1922.16 | 2289.32 | 1626.31 | Up   |
| Pih1d2     | 1495.79 | -0.8925 | 0.25381 | -3.5164 | 0.00044  | 0.00579  | 2078.87 | 1362.26 | 2391.74 | 1078.86 | 772.724 | 1290.31 | Down |
| Dixdc1     | 2590.88 | -0.3472 | 0.14709 | -2.3605 | 0.01825  | 0.09622  | 2790.76 | 2666.32 | 3246.48 | 2360.64 | 1944.17 | 2536.89 | Down |
| 1110032A   | 3243.49 | -0.4355 | 0.15964 | -2.7282 | 0.00637  | 0.04454  | 3940.35 | 3143.75 | 4104.16 | 2770.57 | 2371.75 | 3130.35 | Down |
| Btg4       | 399.287 | -1.0657 | 0.33106 | -3.2192 | 0.00129  | 0.01339  | 746.16  | 318.617 | 556.512 | 247.791 | 191.636 | 335.004 | Down |
| Gm32742    | 394.586 | 0.95022 | 0.288   | 3.29933 | 0.00097  | 0.01073  | 302.577 | 159.802 | 345.018 | 587.356 | 439.937 | 532.826 | Up   |
| Pou2af1    | 508.598 | 0.533   | 0.24363 | 2.18772 | 0.02869  | 0.13104  | 315.307 | 578.048 | 353.79  | 573.08  | 641.876 | 589.489 | Up   |
| 2010007H   | 1179.38 | 0.5107  | 0.25486 | 2.00382 | 0.04509  | 0.17827  | 1225    | 607.641 | 1085.73 | 1280.76 | 1280.66 | 1596.49 | Up   |
| Arhgap20   | 35.355  | 2.05107 | 0.50785 | 4.03869 | 5.38E-05 | 0.00111  | 9.79213 | 22.6879 | 8.77165 | 56.0843 | 70.0603 | 47.7335 | Up   |
| Rdx        | 15975.8 | 0.21955 | 0.09735 | 2.2553  | 0.02411  | 0.11594  | 13655.1 | 15307.4 | 15325   | 16939.5 | 18162.1 | 16465.9 | Up   |
| 4930550C   | 282.986 | -0.5881 | 0.29536 | -1.991  | 0.04648  | 0.18197  | 378.955 | 281.132 | 359.637 | 253.909 | 135.999 | 288.283 | Down |
| Acat1      | 5256.33 | -0.3234 | 0.08514 | -3.7986 | 0.00015  | 0.00251  | 5826.32 | 5572.34 | 6130.41 | 4747.79 | 4561.13 | 4700    | Down |
| Elmod1     | 1753.53 | -0.9971 | 0.32378 | -3.0795 | 0.00207  | 0.01931  | 2723.19 | 1458.93 | 2827.39 | 1147.18 | 722.239 | 1642.22 | Down |
| Tnfaiip8l3 | 765.427 | -0.507  | 0.21856 | -2.3197 | 0.02036  | 0.10351  | 1031.11 | 979.525 | 685.163 | 541.469 | 575.937 | 779.358 | Down |
| Dmxl2      | 2720.34 | 0.60836 | 0.11955 | 5.08885 | 3.60E-07 | 1.70E-05 | 2180.71 | 2123.78 | 2160.75 | 3170.29 | 3713.2  | 2973.29 | Up   |
| Cib2       | 543.659 | 0.61429 | 0.21728 | 2.82726 | 0.00469  | 0.03577  | 452.396 | 508.998 | 327.475 | 690.347 | 745.936 | 536.802 | Up   |
| Idh3a      | 5137.21 | -0.2425 | 0.0992  | -2.4442 | 0.01452  | 0.08156  | 5867.44 | 5073.21 | 5762.97 | 4668.25 | 4628.1  | 4823.27 | Down |
| Chrnb4     | 56.0798 | 1.38462 | 0.41541 | 3.33314 | 0.00086  | 0.00974  | 19.5843 | 40.4436 | 33.1373 | 86.6758 | 100.969 | 55.6684 | Up   |
| EtfA       | 5682.4  | -0.4717 | 0.10768 | -4.3805 | 1.18E-05 | 0.00032  | 6800.63 | 5987.63 | 7021.21 | 5049.63 | 4561.13 | 4674.16 | Down |
| Isl2       | 8.69724 | -2.2439 | 0.83114 | -2.6998 | 0.00694  | 0.04726  | 13.709  | 13.81   | 15.594  | 2.03943 | 2.0606  | 4.97039 | Down |
| Pstpip1    | 643.979 | 0.34726 | 0.17574 | 1.97594 | 0.04816  | 0.18643  | 476.877 | 697.406 | 526.299 | 741.333 | 719.148 | 702.814 | Up   |
| Tspan3     | 4650.46 | -0.4426 | 0.13862 | -3.1929 | 0.00141  | 0.01426  | 5584.45 | 4597.75 | 5892.6  | 4206.32 | 3534.95 | 4086.66 | Down |
| Cspg4      | 979.9   | 0.74291 | 0.13202 | 5.62725 | 1.83E-08 | 1.26E-06 | 730.493 | 710.229 | 758.26  | 1357.24 | 1244.6  | 1078.58 | Up   |
| Gm47237    | 2.39019 | 4.72768 | 2.19821 | 2.15069 | 0.0315   | NA       | 0       | 0       | 0       | 1.01971 | 11.3333 | 1.98816 | Up   |
| Ptpn9      | 554.517 | 0.43993 | 0.16096 | 2.73311 | 0.00627  | 0.04413  | 511.149 | 425.151 | 475.618 | 553.705 | 638.785 | 722.695 | Up   |
| Scamp5     | 872.65  | 0.8529  | 0.2179  | 3.91423 | 9.07E-05 | 0.00171  | 504.295 | 730.944 | 630.584 | 1015.64 | 1426.96 | 927.475 | Up   |
| Gm18103    | 893.048 | -2.0509 | 1.03088 | -1.9894 | 0.04665  | 0.18251  | 1023.28 | 1952.14 | 1341.09 | 77.4983 | 848.966 | 115.313 | Down |
| Scamp2     | 4964.94 | 0.26695 | 0.08807 | 3.03116 | 0.00244  | 0.02196  | 4552.36 | 4447.81 | 4520.32 | 5537.05 | 5655.31 | 5076.76 | Up   |
| Cplx3      | 2.38843 | 4.72655 | 2.09595 | 2.25509 | 0.02413  | NA       | 0       | 0       | 0       | 2.03943 | 10.303  | 1.98816 | Up   |
| Ccdc33     | 2023.97 | -1.1238 | 0.26876 | -4.1814 | 2.90E-05 | 0.00067  | 3156.98 | 1760.78 | 3406.32 | 1381.71 | 947.875 | 1490.12 | Down |
| Stra6      | 60.8671 | -2.6764 | 0.61882 | -4.3251 | 1.52E-05 | 0.00039  | 125.339 | 39.4572 | 151.067 | 9.17743 | 11.3333 | 28.8283 | Down |
| 4930461G   | 1.80091 | -4.2701 | 2.13776 | -1.9975 | 0.04577  | NA       | 2.93764 | 5.91858 | 1.94925 | 0       | 0       | 0       | Down |
| Insyn1     | 1090.11 | -0.9871 | 0.3736  | -2.6421 | 0.00824  | 0.05369  | 1284.73 | 2401.96 | 660.797 | 657.716 | 753.148 | 782.34  | Down |
| Cd276      | 681.995 | 0.44219 | 0.17651 | 2.50526 | 0.01224  | 0.07163  | 518.004 | 694.446 | 522.4   | 737.254 | 891.208 | 728.66  | Up   |
| Hexa       | 8956.36 | 0.54    | 0.14377 | 3.75609 | 0.00017  | 0.00285  | 7263.8  | 8021.65 | 6612.85 | 10895.7 | 11931.9 | 9012.32 | Up   |
| Celf6      | 24.4177 | -1.1889 | 0.55765 | -2.1319 | 0.03301  | 0.14451  | 47.9814 | 19.7286 | 34.112  | 10.1971 | 19.5757 | 14.9112 | Down |
| Parp6      | 2389.01 | -0.232  | 0.11737 | -1.9768 | 0.04806  | 0.18628  | 2463.7  | 2851.77 | 2426.82 | 2154.66 | 2080.17 | 2356.96 | Down |
| 9230112J   | 66.4806 | -1.3616 | 0.31137 | -4.3728 | 1.23E-05 | 0.00033  | 80.2954 | 95.6837 | 111.108 | 39.7689 | 41.2119 | 30.8164 | Down |
| Uaca       | 2232.23 | 0.31141 | 0.13102 | 2.37675 | 0.01747  | 0.0935   | 1785.1  | 2257.94 | 1933.66 | 2544.19 | 2588.11 | 2284.39 | Up   |
| Kif23      | 639.261 | 0.47224 | 0.18636 | 2.53395 | 0.01128  | 0.06751  | 472.96  | 594.817 | 538.969 | 869.817 | 596.543 | 762.458 | Up   |
| Paqr5      | 204.364 | -0.588  | 0.28245 | -2.0817 | 0.03737  | 0.15753  | 305.514 | 169.666 | 261.2   | 156.016 | 134.969 | 198.816 | Down |
| Itga11     | 383.608 | -0.6258 | 0.27797 | -2.2512 | 0.02437  | 0.1167   | 455.334 | 397.531 | 543.842 | 281.441 | 203.999 | 419.501 | Down |
| Calml4     | 1936.13 | -0.9993 | 0.28195 | -3.5442 | 0.00039  | 0.00536  | 2925.89 | 1700.6  | 3116.86 | 1468.39 | 859.269 | 1545.79 | Down |
| Smad6      | 4578.68 | -0.3554 | 0.17212 | -2.0651 | 0.03891  | 0.16209  | 5776.38 | 5145.22 | 4497.9  | 4099.25 | 4714.65 | 3238.71 | Down |
| Lctl       | 15.6657 | -7.3913 | 1.77426 | -4.1659 | 3.10E-05 | 0.00071  | 84.2123 | 2.95929 | 6.82239 | 0       | 0       | 0       | Down |
| Map2k1     | 5674.8  | 0.3126  | 0.1183  | 2.64245 | 0.00823  | 0.05366  | 5191.79 | 5507.24 | 4488.16 | 6100.95 | 6721.67 | 6039.03 | Up   |
| Megf11     | 499.573 | -1.0429 | 0.39699 | -2.627  | 0.00861  | 0.05545  | 1060.49 | 277.187 | 680.29  | 342.624 | 357.514 | 279.336 | Down |
| Hacd3      | 10527.1 | 0.27511 | 0.10807 | 2.54564 | 0.01091  | 0.06585  | 9422.96 | 10501.5 | 8654.69 | 11332.1 | 11979.3 | 11271.9 | Up   |
| Dpp8       | 399.799 | 0.64669 | 0.18809 | 3.43819 | 0.00059  | 0.0073   | 352.517 | 302.834 | 279.718 | 410.945 | 482.18  | 570.601 | Up   |
| Clpx       | 3443.71 | -0.247  | 0.09421 | -2.6221 | 0.00874  | 0.05607  | 3963.85 | 3534.38 | 3715.28 | 3106.05 | 3067.2  | 3275.49 | Down |
| Pdcd7      | 1079.77 | -0.2305 | 0.10386 | -2.2196 | 0.02644  | 0.12374  | 1151.55 | 1235.01 | 1111.08 | 1009.52 | 966.42  | 1005.01 | Down |
| Plekho2    | 1742.23 | 0.42469 | 0.21463 | 1.97874 | 0.04785  | 0.18579  | 1554.01 | 1674.96 | 1233.88 | 1649.9  | 2615.93 | 1724.73 | Up   |
| Snx22      | 287.026 | -1.1732 | 0.3896  | -3.0114 | 0.0026   | 0.02304  | 413.228 | 590.871 | 189.078 | 147.859 | 152.484 | 228.638 | Down |
| Ciao2a     | 3426.76 | 0.27118 | 0.11646 | 2.32857 | 0.01988  | 0.10187  | 2892.59 | 3466.31 | 2957.99 | 3809.65 | 3909.98 | 3524.01 | Up   |
| Usp3       | 3045.1  | 0.37782 | 0.09607 | 3.9326  | 8.40E-05 | 0.0016   | 2495.03 | 2829.08 | 2621.75 | 3426.24 | 3551.44 | 3347.06 | Up   |
| Gm10647    | 113.991 | -0.8832 | 0.39203 | -2.253  | 0.02426  | 0.11637  | 201.718 | 93.7108 | 148.143 | 78.518  | 51.5149 | 110.343 | Down |
| Ppp1r2-p   | 27.3296 | -1.5163 | 0.5186  | -2.9239 | 0.00346  | 0.02851  | 37.2101 | 43.4029 | 40.9343 | 18.3549 | 6.18179 | 17.8934 | Down |
| Aph1c      | 809.795 | 0.69307 | 0.13158 | 5.26725 | 1.38E-07 | 7.38E-06 | 584.59  | 597.776 | 674.442 | 1083.96 | 916.966 | 1001.04 | Up   |
| Rab8b      | 3395.01 | 0.55775 | 0.15005 | 3.71705 | 0.0002   | 0.00321  | 2577.29 | 3137.83 | 2525.26 | 3612.85 | 4652.83 | 3863.98 | Up   |
| Gm19299    | 364.736 | -1.0527 | 0.2299  | -4.5788 | 4.68E-06 | 0.00015  | 571.86  | 438.961 | 465.872 | 273.284 | 171.03  | 267.407 | Down |
| Vps13c     | 1065.8  | 0.5477  | 0.13684 | 4.00263 | 6.26E-05 | 0.00125  | 932.211 | 880.882 | 784.575 | 1131.88 | 1389.87 | 1275.4  | Up   |
| B230323A   | 111.774 | 7.40882 | 0.90787 | 8.16063 | 3.33E-16 | 1.11E-13 | 1.95843 | 1.97286 | 0       | 202.923 | 383.271 | 80.5204 | Up   |
| Fam81a     | 974.486 | -1.181  | 0.2738  | -4.3132 | 1.61E-05 | 0.00041  | 1565.76 | 863.126 | 1628.6  | 582.257 | 462.604 | 744.565 | Down |
| Adam10     | 8057.67 | 0.23627 | 0.10096 | 2.34023 | 0.01927  | 0.09967  | 6947.51 | 7865.79 | 7384.75 | 8107.75 | 9124.32 | 8915.89 | Up   |
| Aqp9       | 202.52  | 1.63848 | 0.30418 | 5.38651 | 7.18E-08 | 4.23E-06 | 79.3162 | 142.046 | 74.0717 | 274.303 | 373.998 | 271.383 | Up   |
| Gm27188    | 32.0176 | -1.0044 | 0.50426 | -1.9919 | 0.04639  | 0.18179  | 42.1061 | 26.6336 | 59.4523 | 29.5717 | 15.4545 | 18.8875 | Down |
| Mns1       | 546.714 | -0      |         |         |          |          |         |         |         |         |         |         |      |

|          |         |         |         |         |          |          |         |         |         |         |         |         |      |
|----------|---------|---------|---------|---------|----------|----------|---------|---------|---------|---------|---------|---------|------|
| Gnb5     | 995.654 | -0.6619 | 0.16778 | -3.9451 | 7.98E-05 | 0.00154  | 1360.13 | 1084.09 | 1216.33 | 718.899 | 677.936 | 916.54  | Down |
| Gm7972   | 55.1458 | -0.9424 | 0.36878 | -2.5555 | 0.0106   | 0.06467  | 73.441  | 83.8465 | 60.4269 | 33.6506 | 27.8181 | 51.6921 | Down |
| Tmod3    | 12510.4 | 0.2103  | 0.07886 | 2.66678 | 0.00766  | 0.05075  | 11472.5 | 11853.9 | 11474.3 | 12804.6 | 13733.9 | 13723.3 | Up   |
| Bmp5     | 1477.15 | 0.3707  | 0.13575 | 2.73077 | 0.00632  | 0.04434  | 1362.08 | 1332.67 | 1170.53 | 1451.05 | 1772.11 | 1774.43 | Up   |
| Hmgcd11  | 1849.05 | -0.3931 | 0.10718 | -3.6675 | 0.00024  | 0.00375  | 2046.55 | 2072.49 | 2179.27 | 1664.17 | 1454.78 | 1677.01 | Down |
| Tinag    | 1334.37 | -0.9841 | 0.35409 | -2.7793 | 0.00545  | 0.03977  | 1800.77 | 2429.58 | 1087.68 | 753.569 | 569.755 | 1364.87 | Down |
| Mlip     | 40.4466 | -2.3685 | 0.74454 | -3.1811 | 0.00147  | 0.01475  | 98.9005 | 12.8236 | 91.615  | 11.2169 | 8.24239 | 19.8816 | Down |
| Klhl31   | 125.057 | -4.0213 | 0.3702  | -10.863 | 1.74E-27 | 2.74E-24 | 251.658 | 170.652 | 284.591 | 13.2563 | 10.303  | 19.8816 | Down |
| Elov15   | 17635.1 | 0.45834 | 0.07915 | 5.79068 | 7.01E-09 | 5.33E-07 | 15057.4 | 14197.7 | 15316.3 | 20625.8 | 19855.9 | 20757.4 | Up   |
| Cilk1    | 4671.6  | 0.35528 | 0.12249 | 2.90036 | 0.00373  | 0.03016  | 4258.6  | 3536.35 | 4502.78 | 5240.31 | 5374.04 | 5117.52 | Up   |
| Gsta1    | 16.2725 | -1.9339 | 0.60416 | -3.201  | 0.00137  | 0.01401  | 21.5427 | 25.6472 | 30.2134 | 8.15772 | 4.12119 | 7.95263 | Down |
| Gsta2    | 140.613 | -1.4392 | 0.54484 | -2.6416 | 0.00825  | 0.05374  | 109.672 | 157.829 | 348.917 | 104.011 | 27.8181 | 95.4315 | Down |
| Dppa5a   | 13.9867 | -2.0569 | 0.68109 | -3.0201 | 0.00253  | 0.0226   | 13.709  | 27.62   | 26.3149 | 6.11829 | 6.18179 | 3.97631 | Down |
| Ooep     | 103.757 | -0.9049 | 0.33946 | -2.6658 | 0.00768  | 0.05085  | 98.9005 | 158.815 | 148.143 | 90.7546 | 47.3937 | 78.5322 | Down |
| Gm8093   | 3.8678  | 2.78844 | 1.32542 | 2.10382 | 0.03539  | NA       | 0.97921 | 0       | 1.94925 | 7.138   | 6.18179 | 6.95855 | Up   |
| Tmem30a  | 30578.4 | 0.49791 | 0.12518 | 3.97756 | 6.96E-05 | 0.00138  | 24355   | 28624.2 | 23081.1 | 32925.6 | 38541.4 | 35942.9 | Up   |
| Htr1b    | 436.97  | -0.8641 | 0.37585 | -2.2992 | 0.02149  | 0.10714  | 793.162 | 284.092 | 614.99  | 300.816 | 212.241 | 416.519 | Down |
| D430036J | 1225.02 | -0.8563 | 0.29355 | -2.9172 | 0.00353  | 0.02899  | 1843.86 | 1085.07 | 1805.98 | 974.847 | 540.907 | 1099.45 | Down |
| Irak1bp1 | 704.184 | -0.5184 | 0.22466 | -2.3075 | 0.02102  | 0.1059   | 883.25  | 623.424 | 981.45  | 644.46  | 453.331 | 639.192 | Down |
| Hmgn3    | 1026.49 | -0.671  | 0.19871 | -3.3767 | 0.00073  | 0.00861  | 1330.75 | 976.565 | 1475.59 | 931     | 696.482 | 748.541 | Down |
| Lca5     | 1466.73 | -0.5352 | 0.25209 | -2.123  | 0.03375  | 0.14684  | 2108.25 | 1190.62 | 1908.32 | 1186.95 | 921.087 | 1485.15 | Down |
| Gm36120  | 4.53174 | 3.68748 | 1.62295 | 2.27209 | 0.02308  | NA       | 1.95843 | 0       | 0       | 12.2366 | 2.0606  | 10.9349 | Up   |
| Rwd42a   | 96.6152 | 0.80799 | 0.27729 | 2.91388 | 0.00357  | 0.02925  | 89.1084 | 67.0772 | 54.5791 | 120.326 | 115.393 | 133.207 | Up   |
| A330041J | 65.5011 | -0.8696 | 0.34961 | -2.4872 | 0.01287  | 0.07432  | 75.3994 | 101.602 | 76.9956 | 63.2223 | 35.0301 | 40.7572 | Down |
| Cyb5r4   | 3290.29 | 0.42408 | 0.12029 | 3.52555 | 0.00042  | 0.00564  | 2561.62 | 2905.04 | 2963.84 | 3381.37 | 3962.53 | 3967.37 | Up   |
| Gm28231  | 32.7274 | -3.6812 | 0.66641 | -5.5239 | 3.32E-08 | 2.08E-06 | 102.817 | 33.5386 | 45.8075 | 4.07886 | 5.15149 | 4.97039 | Down |
| Syncrip  | 1654.57 | 0.28967 | 0.12049 | 2.40403 | 0.01622  | 0.08846  | 1558.91 | 1469.78 | 1438.55 | 1710.06 | 1710.3  | 2039.85 | Up   |
| 9430037G | 30.0577 | 0.87358 | 0.43995 | 1.98565 | 0.04707  | 0.18351  | 22.5219 | 17.7557 | 23.3911 | 27.5323 | 47.3937 | 41.7513 | Up   |
| Gm10634  | 25.2751 | 1.065   | 0.46309 | 2.29976 | 0.02146  | 0.10711  | 18.605  | 18.7422 | 11.6955 | 38.7492 | 35.0301 | 28.8283 | Up   |
| Bcl2a1a  | 492.066 | 1.2292  | 0.25587 | 4.80405 | 1.55E-06 | 5.84E-05 | 320.203 | 343.278 | 219.291 | 645.48  | 894.299 | 529.844 | Up   |
| Rasgrf1  | 161.784 | -1.4832 | 0.44881 | -3.3047 | 0.00095  | 0.01057  | 153.736 | 153.883 | 407.394 | 91.7743 | 53.5755 | 110.343 | Down |
| Ctsh     | 34601.1 | 0.3827  | 0.10839 | 3.53069 | 0.00041  | 0.00558  | 32121.1 | 27553   | 30441.5 | 42357.9 | 36983.6 | 38149.8 | Up   |
| Tbcl1d2b | 502.051 | 1.0635  | 0.174   | 6.11207 | 9.83E-10 | 8.78E-08 | 351.537 | 290.01  | 333.323 | 564.922 | 715.027 | 757.488 | Up   |
| Plscr1   | 7075.15 | 0.26172 | 0.11104 | 2.35709 | 0.01842  | 0.09677  | 6911.28 | 5678.88 | 6715.18 | 7545.89 | 7877.66 | 7722    | Up   |
| 1700065D | 2.28353 | -4.6133 | 2.02164 | -2.2819 | 0.02249  | NA       | 1.95843 | 3.94572 | 7.79702 | 0       | 0       | 0       | Down |
| Gk5      | 331.833 | 0.66901 | 0.18389 | 3.63801 | 0.00027  | 0.00407  | 283.972 | 275.214 | 209.545 | 383.413 | 448.18  | 390.673 | Up   |
| Gm28688  | 25.8046 | -1.7537 | 0.57247 | -3.0634 | 0.00219  | 0.0202   | 47.0022 | 26.6336 | 45.8075 | 16.3154 | 5.15149 | 13.9171 | Down |
| Gm8520   | 60.7923 | -1.5201 | 0.32232 | -4.7162 | 2.40E-06 | 8.48E-05 | 76.3786 | 93.7108 | 100.387 | 36.7097 | 25.7575 | 31.8105 | Down |
| Pxylp1   | 913.882 | -0.8618 | 0.37316 | -2.3095 | 0.02092  | 0.10547  | 928.294 | 792.103 | 1816.71 | 579.198 | 399.756 | 967.238 | Down |
| Spsb4    | 74.93   | -1.3821 | 0.36221 | -3.8157 | 0.00014  | 0.00238  | 109.672 | 70.0365 | 145.219 | 42.828  | 37.0907 | 44.7335 | Down |
| Nmnat3   | 267.629 | 0.6692  | 0.23252 | 2.87806 | 0.004    | 0.03169  | 164.508 | 187.422 | 268.023 | 314.072 | 303.938 | 367.809 | Up   |
| Mrps22   | 731.421 | -0.2554 | 0.12925 | -1.9757 | 0.04819  | 0.18648  | 831.352 | 753.632 | 803.093 | 677.091 | 600.664 | 722.695 | Down |
| Cep70    | 1229.48 | 0.28376 | 0.1383  | 2.0518  | 0.04019  | 0.16536  | 1038.94 | 1018    | 1269.94 | 1427.6  | 1245.63 | 1376.8  | Up   |
| Gm37249  | 117.15  | 0.51706 | 0.22487 | 2.29941 | 0.02148  | 0.10712  | 93.0252 | 100.616 | 95.5135 | 156.016 | 120.545 | 137.183 | Up   |
| Esy3     | 907.89  | 0.47349 | 0.18453 | 2.56589 | 0.01029  | 0.06325  | 776.516 | 756.592 | 747.539 | 1340.93 | 923.147 | 902.623 | Up   |
| Nme9     | 4778.42 | -1.0061 | 0.26944 | -3.7339 | 0.00019  | 0.00305  | 7637.86 | 4163.72 | 7338.94 | 3693.41 | 2216.17 | 3620.43 | Down |
| A4gnt    | 6.90399 | -3.6438 | 1.41546 | -2.5743 | 0.01005  | NA       | 5.87528 | 24.6607 | 7.79702 | 0       | 3.0909  | 0       | Down |
| Dzip1l   | 2277.63 | -0.657  | 0.20429 | -3.216  | 0.0013   | 0.01347  | 2919.03 | 2125.76 | 3317.63 | 1995.58 | 1427.99 | 1879.8  | Down |
| Gm34397  | 31.4633 | 2.95552 | 0.51542 | 5.7342  | 9.80E-09 | 7.24E-07 | 9.79213 | 5.91858 | 5.84776 | 40.7886 | 61.8179 | 64.6151 | Up   |
| Il20rb   | 239.311 | 0.41445 | 0.17563 | 2.35982 | 0.01828  | 0.09622  | 190.946 | 209.123 | 215.393 | 304.895 | 270.968 | 244.543 | Up   |
| Stag1    | 3370.15 | 0.20222 | 0.1005  | 2.0122  | 0.0442   | 0.17589  | 3008.14 | 3371.62 | 3023.29 | 3430.32 | 3776.04 | 3611.49 | Up   |
| Pccb     | 3909.15 | -0.2121 | 0.08195 | -2.5879 | 0.00966  | 0.06019  | 4037.29 | 4256.44 | 4294.21 | 3602.65 | 3550.41 | 3713.88 | Down |
| Ephb1    | 24.0381 | 1.1383  | 0.52567 | 2.16545 | 0.03035  | 0.13621  | 21.5427 | 10.8507 | 12.6702 | 37.7295 | 22.6666 | 38.7691 | Up   |
| Ky       | 837.821 | -1.8065 | 0.37584 | -4.8067 | 1.53E-06 | 5.77E-05 | 1437.48 | 676.691 | 1795.26 | 353.841 | 231.817 | 531.832 | Down |
| Cep63    | 2347.15 | -0.2918 | 0.11155 | -2.6158 | 0.0089   | 0.05685  | 2819.15 | 2482.84 | 2449.24 | 2074.1  | 2004.96 | 2252.58 | Down |
| Ryk      | 6098.73 | -0.2164 | 0.08228 | -2.6305 | 0.00853  | 0.0551   | 6744.82 | 6225.36 | 6695.69 | 5707.34 | 5683.13 | 5536.02 | Down |
| 1300017J | 72.794  | -1.5313 | 0.29861 | -5.128  | 2.93E-07 | 1.43E-05 | 108.693 | 89.7651 | 123.778 | 35.69   | 33.9998 | 41.7513 | Down |
| Tmem108  | 174.552 | -0.7487 | 0.21489 | -3.4839 | 0.00049  | 0.00639  | 189.967 | 219.974 | 246.581 | 150.918 | 121.575 | 118.295 | Down |
| Gm29154  | 41.5038 | -3.128  | 0.70499 | -4.437  | 9.12E-06 | 0.00026  | 72.4617 | 70.0365 | 80.8941 | 12.2366 | 13.3939 | 0       | Down |
| Gm28305  | 2.02159 | 4.48781 | 2.04969 | 2.18951 | 0.02856  | NA       | 0       | 0       | 0       | 5.09857 | 2.0606  | 4.97039 | Up   |
| Nek11    | 811.12  | -0.8327 | 0.30909 | -2.6941 | 0.00706  | 0.04781  | 1148.62 | 688.528 | 1279.69 | 657.716 | 358.544 | 733.63  | Down |
| 4930500F | 10.6903 | -1.8169 | 0.74049 | -2.4536 | 0.01414  | 0.07991  | 16.6466 | 15.7829 | 17.5433 | 7.138   | 2.0606  | 4.97039 | Down |
| Poc1a    | 441.919 | -0.4941 | 0.16292 | -3.0327 | 0.00242  | 0.02187  | 430.854 | 559.306 | 560.411 | 378.314 | 365.756 | 356.874 | Down |
| Abhd14b  | 1581.47 | -0.2308 | 0.10241 | -2.2535 | 0.02423  | 0.11625  | 1726.35 | 1640.43 | 1756.28 | 1550.99 | 1372.36 | 1442.41 | Down |
| Mapkapk3 | 3719.29 | 0.52102 | 0.09308 | 5.59742 | 2.18E-08 | 1.46E-06 | 3060.04 | 3047.08 | 3057.41 | 4329.71 | 4695.07 | 4126.42 | Up   |
| Hemk1    | 770.981 | -0.2631 | 0.12685 | -2.0737 | 0.03811  | 0.15971  | 825.476 | 823.669 | 874.241 | 671.992 | 651.149 | 779.358 | Down |
| Zmynd10  | 503.94  | -1.0602 | 0.27948 | -3.7934 | 0.00015  | 0.00254  | 792.183 | 495.188 | 756.311 | 363.019 | 215.332 | 401.608 | Down |
| Mst1     | 310.926 | -0.9834 | 0.4001  | -2.4579 | 0.01397  | 0.07919  | 541.505 | 217.015 | 480.491 | 182.529 | 131.878 | 312.141 | Down |
| Bsn      | 123.535 | 0.71914 | 0.2756  | 2.60942 | 0.00907  | 0.05756  | 94.0044 | 72.0094 | 114.031 | 132.563 | 185.454 | 143.147 | Up   |
| Nicn1    | 1090.51 | -0.2717 | 0.10022 | -2.7109 | 0.00671  | 0.04611  | 1215.2  | 1221.2  | 1142.26 | 1023.79 | 965.39  | 975.191 | Down |
| Amt      | 867.096 | -0.3996 | 0.19022 | -2.1007 | 0.03567  | 0.15271  | 1121.2  | 901.597 | 936.617 | 691.367 | 623.331 | 928.469 | Down |
| Gpx1     | 21369.4 | 0.25827 | 0.12436 | 2.07685 | 0.03782  | 0.15879  | 17902.9 | 21426.2 | 19055.9 | 23985.7 | 25130   | 20715.6 | Up   |
| 1700102P | 129.236 | -0.4891 | 0.24294 | -2.0132 | 0.0441   | 0.17562  | 181.154 | 140.073 | 131.575 | 92.7941 | 118.484 | 111.337 | Down |
| Ndufaf3  | 1352.7  | -0.2996 | 0.10654 | -2.8125 | 0.00492  | 0.03691  | 1546.18 | 1397.77 | 1534.06 | 1273.62 | 1149.81 | 1214.76 | Down |
| Dalrd3   | 5666.05 | -0.3396 | 0.14861 | -2.285  | 0.02231  | 0.10976  | 7009.2  | 5313.9  | 6666.45 | 5409.59 | 4421.01 | 5176.17 | Down |
| P4htm    | 639.561 | -0.5167 | 0.14931 | -3.4605 | 0.00054  | 0.00683  | 728.534 | 737.849 | 792.372 | 565.942 | 444.059 | 568.613 | Down |
| Celsr3   | 68.3919 | 0.93074 | 0.30198 | 3.08211 | 0.00206  | 0.01918  | 38.1893 | 55.2401 | 47.7567 | 82.5969 | 104.06  | 82.5085 | Up   |
| Pfkfb4   | 5072.25 | 0.64    |         |         |          |          |         |         |         |         |         |         |      |

|          |         |         |         |         |          |          |         |         |         |         |         |         |      |
|----------|---------|---------|---------|---------|----------|----------|---------|---------|---------|---------|---------|---------|------|
| Cspg5    | 39.6848 | -0.8441 | 0.35121 | -2.4034 | 0.01624  | 0.08855  | 54.8359 | 53.2672 | 44.8329 | 27.5323 | 27.8181 | 29.8224 | Down |
| Ngp      | 171.421 | -1.9367 | 0.89    | -2.1761 | 0.02955  | 0.13365  | 238.928 | 209.123 | 367.434 | 158.056 | 37.0907 | 17.8934 | Down |
| Khlh18   | 1447.24 | 0.30176 | 0.09444 | 3.19524 | 0.0014   | 0.0142   | 1313.12 | 1329.71 | 1246.55 | 1549.97 | 1594.9  | 1649.18 | Up   |
| Kif9     | 2422.79 | -0.7652 | 0.2797  | -2.7356 | 0.00623  | 0.04396  | 3550.63 | 1968.91 | 3632.44 | 1995.58 | 1227.09 | 2162.12 | Down |
| Stac     | 133.247 | 2.5624  | 0.28364 | 9.03388 | 1.66E-19 | 8.25E-17 | 39.1685 | 49.3215 | 27.2896 | 218.219 | 261.696 | 203.786 | Up   |
| Arpp21   | 52.0519 | 1.34535 | 0.5597  | 2.40371 | 0.01623  | 0.08851  | 13.709  | 33.5386 | 40.9343 | 115.228 | 72.1209 | 36.7809 | Up   |
| Fbxl2    | 922.909 | -0.47   | 0.17056 | -2.7558 | 0.00585  | 0.04199  | 1205.41 | 878.909 | 1131.54 | 812.713 | 674.845 | 834.032 | Down |
| Susd5    | 19.9511 | 1.2588  | 0.52087 | 2.41675 | 0.01566  | 0.08617  | 11.7506 | 9.8643  | 13.6448 | 29.5717 | 33.9998 | 20.8756 | Up   |
| 4930520C | 108.79  | -0.5974 | 0.2772  | -2.1553 | 0.03114  | 0.13833  | 140.027 | 126.263 | 126.702 | 114.208 | 67.9997 | 77.5381 | Down |
| Gpd1l    | 4041    | -0.284  | 0.09323 | -3.0465 | 0.00232  | 0.02113  | 4732.54 | 4190.35 | 4389.72 | 3605.71 | 3572.04 | 3755.63 | Down |
| Gm5921   | 49.5476 | -1.2875 | 0.4225  | -3.0473 | 0.00231  | 0.0211   | 47.0022 | 91.738  | 72.1224 | 37.7295 | 27.8181 | 20.8756 | Down |
| Tgfb2    | 22662.7 | 0.25966 | 0.12284 | 2.11387 | 0.03453  | 0.14917  | 19458.9 | 23105.1 | 19322   | 23934.7 | 27090.7 | 23064.6 | Up   |
| Rbms3    | 4243.72 | 0.22972 | 0.10594 | 2.16843 | 0.03013  | 0.13544  | 3747.45 | 4129.19 | 3842.96 | 4418.42 | 5001.07 | 4323.25 | Up   |
| 2610509F | 3.10467 | -5.0562 | 1.75914 | -2.8742 | 0.00405  | NA       | 5.87528 | 6.90501 | 5.84776 | 0       | 0       | 0       | Down |
| Platr11  | 1.96182 | -4.3939 | 2.16897 | -2.0258 | 0.04279  | NA       | 0.97921 | 5.91858 | 4.87314 | 0       | 0       | 0       | Down |
| Vill     | 2344.18 | -0.6767 | 0.2894  | -2.3384 | 0.01936  | 0.09988  | 3285.26 | 1699.62 | 3667.52 | 2063.9  | 1321.87 | 2026.93 | Down |
| Plcd1    | 723.009 | 0.36003 | 0.14499 | 2.48319 | 0.01302  | 0.07504  | 645.301 | 653.016 | 601.345 | 794.358 | 928.299 | 715.737 | Up   |
| Dlec1    | 1719.06 | -0.8684 | 0.3069  | -2.8296 | 0.00466  | 0.03555  | 2761.38 | 1418.49 | 2484.32 | 1351.12 | 756.239 | 1542.81 | Down |
| Gm10608  | 31.6177 | -0.8702 | 0.42188 | -2.0627 | 0.03914  | 0.16261  | 38.1893 | 49.3215 | 35.0866 | 26.5126 | 23.6969 | 16.8993 | Down |
| Xylb     | 1010.46 | -0.8481 | 0.20473 | -4.1425 | 3.44E-05 | 0.00077  | 1458.05 | 985.443 | 1454.14 | 744.392 | 598.603 | 822.103 | Down |
| Scn5a    | 722.905 | -1.7291 | 0.34581 | -5.0001 | 5.73E-07 | 2.51E-05 | 1502.11 | 560.292 | 1269.94 | 301.836 | 266.847 | 436.4   | Down |
| Cx3cr1   | 4035.14 | -0.5987 | 0.18368 | -3.2593 | 0.00112  | 0.012    | 5151.64 | 3794.79 | 5635.29 | 3669.95 | 2762.23 | 3196.96 | Down |
| Slc25a38 | 1381.12 | -0.2267 | 0.10401 | -2.18   | 0.02926  | 0.13281  | 1521.7  | 1474.71 | 1471.69 | 1294.02 | 1346.6  | 1177.98 | Down |
| Eif1b    | 2389.88 | -0.2334 | 0.09664 | -2.4146 | 0.01575  | 0.08649  | 2752.57 | 2497.64 | 2497.97 | 2288.24 | 2163.63 | 2139.26 | Down |
| Gm39458  | 11.0928 | 2.37169 | 0.9654  | 2.4567  | 0.01402  | 0.07933  | 6.85449 | 1.97286 | 1.94925 | 5.09857 | 27.8181 | 22.8638 | Up   |
| Gm47063  | 6.0366  | 4.12499 | 1.45335 | 2.83826 | 0.00454  | NA       | 0       | 1.97286 | 0       | 9.17743 | 6.18179 | 18.8875 | Up   |
| Ctnnb1   | 7085.42 | 0.41265 | 0.15987 | 2.58108 | 0.00985  | 0.06107  | 7259.88 | 5853.47 | 5123.62 | 7333.79 | 7994.09 | 8947.7  | Up   |
| Ulk4     | 1851.16 | -0.7821 | 0.29282 | -2.6707 | 0.00757  | 0.05031  | 2819.15 | 1487.54 | 2716.29 | 1477.57 | 903.572 | 1702.86 | Down |
| Cck      | 8.66521 | -3.2142 | 1.17535 | -2.7347 | 0.00624  | 0.04405  | 24.4803 | 3.94572 | 18.5179 | 3.05914 | 0       | 1.98816 | Down |
| Lyzl4    | 165.592 | -1.0755 | 0.45959 | -2.3402 | 0.01927  | 0.09967  | 275.159 | 86.8058 | 311.881 | 122.366 | 71.0906 | 126.248 | Down |
| NKtr     | 1876.49 | 0.38771 | 0.16318 | 2.37602 | 0.0175   | 0.0936   | 1699.91 | 1508.25 | 1669.54 | 1930.32 | 1850.42 | 2600.51 | Up   |
| Hhatl    | 364.621 | -1.197  | 0.30952 | -3.8673 | 0.00011  | 0.00201  | 647.26  | 319.603 | 556.512 | 222.298 | 160.727 | 281.324 | Down |
| Ccdc13   | 565.127 | -0.7946 | 0.29259 | -2.7156 | 0.00662  | 0.04576  | 866.603 | 464.608 | 819.662 | 436.438 | 289.514 | 513.939 | Down |
| Ackr2    | 1775.26 | 0.32589 | 0.15432 | 2.1118  | 0.0347   | 0.14958  | 1363.06 | 1481.62 | 1882.01 | 1953.77 | 2113.14 | 1857.93 | Up   |
| Gask1a   | 396.301 | -0.6566 | 0.17103 | -3.8393 | 0.00012  | 0.00221  | 459.251 | 547.468 | 448.329 | 294.698 | 277.15  | 350.91  | Down |
| Abhd5    | 2748.36 | 0.33583 | 0.1275  | 2.63393 | 0.00844  | 0.05469  | 2461.74 | 2659.41 | 2168.55 | 2981.65 | 3360.83 | 2857.98 | Up   |
| A730085K | 107.414 | 0.91403 | 0.31325 | 2.91791 | 0.00352  | 0.02895  | 81.2747 | 67.0772 | 75.0463 | 107.07  | 194.726 | 119.289 | Up   |
| Gm47135  | 18.5585 | 2.13832 | 0.7293  | 2.932   | 0.00337  | 0.02803  | 7.8337  | 8.87787 | 3.89851 | 15.2957 | 53.5755 | 21.8697 | Up   |
| Clec3b   | 3050.84 | -0.3902 | 0.18706 | -2.0861 | 0.03697  | 0.15663  | 3413.54 | 3706.02 | 3263.05 | 2993.88 | 2994.05 | 1934.48 | Down |
| Cdcp1    | 3535.43 | 0.615   | 0.08589 | 7.16011 | 8.06E-13 | 1.36E-10 | 2880.84 | 2812.31 | 2686.07 | 4179.81 | 4441.62 | 4211.91 | Up   |
| Lars2    | 4362.83 | -0.2851 | 0.13877 | -2.0547 | 0.03991  | 0.16479  | 4171.45 | 5447.06 | 4759.11 | 4322.57 | 3797.68 | 3679.08 | Down |
| Sacm1l   | 1268.59 | 0.43598 | 0.18751 | 2.32511 | 0.02007  | 0.10249  | 1248.5  | 925.271 | 1061.37 | 1235.89 | 1363.08 | 1777.41 | Up   |
| Fyco1    | 1029.52 | 0.40843 | 0.11613 | 3.51695 | 0.00044  | 0.00578  | 928.294 | 808.872 | 917.124 | 1208.36 | 1110.66 | 1203.83 | Up   |
| Xcr1     | 338.739 | 0.43768 | 0.17899 | 2.44522 | 0.01448  | 0.08146  | 321.182 | 249.567 | 292.388 | 389.531 | 435.816 | 343.951 | Up   |
| Ccr1     | 1098.98 | 0.73241 | 0.18197 | 4.02492 | 5.70E-05 | 0.00116  | 877.375 | 967.687 | 632.533 | 1417.4  | 1440.36 | 1258.5  | Up   |
| Ccr2     | 1833.3  | 0.51736 | 0.20542 | 2.51859 | 0.01178  | 0.06963  | 1119.24 | 1753.87 | 1651.02 | 1958.87 | 2564.41 | 1952.37 | Up   |
| Ccr5     | 814.212 | 1.13983 | 0.19975 | 5.70633 | 1.15E-08 | 8.37E-07 | 422.041 | 629.342 | 473.669 | 957.512 | 1103.45 | 1299.26 | Up   |
| 2010315B | 1441.92 | 0.48329 | 0.14563 | 3.3186  | 0.0009   | 0.01012  | 1080.07 | 1285.32 | 1242.65 | 1522.43 | 1583.57 | 1937.46 | Up   |
| Ppp1r14c | 10451.5 | -0.6893 | 0.18443 | -3.7373 | 0.00019  | 0.00302  | 14564.8 | 14581.4 | 7959.88 | 7659.54 | 8840.34 | 8840.34 | Down |
| lyd      | 678.51  | -1.468  | 0.33127 | -4.4315 | 9.36E-06 | 0.00026  | 1127.07 | 795.062 | 1068.19 | 381.373 | 184.423 | 514.933 | Down |
| Plekhhg1 | 2008.16 | 0.70785 | 0.14316 | 4.94449 | 7.63E-07 | 3.18E-05 | 1594.16 | 1713.43 | 1267.99 | 2364.72 | 2547.93 | 2560.75 | Up   |
| Gm21781  | 453.738 | -0.3547 | 0.15914 | -2.2291 | 0.02581  | 0.1215   | 469.043 | 588.898 | 469.77  | 385.452 | 426.544 | 382.72  | Down |
| Rgs17    | 126.985 | 0.79071 | 0.27726 | 2.85191 | 0.00435  | 0.03376  | 87.1499 | 78.9144 | 113.057 | 129.504 | 152.484 | 200.804 | Up   |
| Cnksr3   | 1054.71 | 0.30226 | 0.14064 | 2.14915 | 0.03162  | 0.13998  | 901.855 | 1092.96 | 839.154 | 1130.86 | 1144.66 | 1218.74 | Up   |
| Ulbp1    | 343.865 | 0.83948 | 0.23023 | 3.64622 | 0.00027  | 0.00398  | 201.718 | 325.522 | 212.469 | 388.511 | 467.755 | 467.217 | Up   |
| Adgb     | 2371.91 | -0.7757 | 0.29923 | -2.5922 | 0.00954  | 0.05968  | 3757.24 | 1769.65 | 3457    | 1893.61 | 1214.72 | 2139.26 | Down |
| Rab32    | 1604.2  | 1.08553 | 0.17095 | 6.35016 | 2.15E-10 | 2.20E-08 | 1059.51 | 1055.48 | 967.805 | 1917.06 | 2711.75 | 1913.6  | Up   |
| Plagl1   | 1337.44 | -0.284  | 0.13554 | -2.0953 | 0.03614  | 0.15417  | 1514.84 | 1346.48 | 1544.78 | 1267.51 | 1047.81 | 1303.24 | Down |
| Adat2    | 269.579 | -0.4258 | 0.15701 | -2.7119 | 0.00669  | 0.04608  | 290.826 | 317.63  | 318.703 | 244.732 | 232.847 | 212.733 | Down |
| Hivep2   | 851.979 | 0.29726 | 0.14399 | 2.06445 | 0.03898  | 0.16224  | 744.202 | 715.161 | 834.281 | 935.079 | 830.421 | 1052.73 | Up   |
| Cited2   | 4894.84 | 0.74749 | 0.18853 | 3.96481 | 7.35E-05 | 0.00144  | 3600.57 | 4175.56 | 3187.03 | 6544.53 | 7182.21 | 4679.13 | Up   |
| Txlnb    | 93.2027 | -1.5979 | 0.70574 | -2.2641 | 0.02357  | 0.11388  | 203.676 | 29.5929 | 187.128 | 20.3943 | 31.9393 | 86.4848 | Down |
| Abrac1   | 1596.12 | 0.30546 | 0.12196 | 2.50467 | 0.01226  | 0.07166  | 1446.3  | 1442.16 | 1394.69 | 1807.95 | 1932.84 | 1552.75 | Up   |
| Ect2l    | 1025.94 | -0.6697 | 0.33255 | -2.0137 | 0.04404  | 0.17551  | 1571.64 | 858.194 | 1349.86 | 861.659 | 433.756 | 1080.56 | Down |
| Nhsl1    | 764.724 | -0.3962 | 0.14182 | -2.7934 | 0.00522  | 0.03858  | 931.231 | 875.949 | 800.169 | 686.268 | 577.997 | 716.731 | Down |
| Gm48297  | 3.04263 | 4.03536 | 1.77482 | 2.27367 | 0.02299  | NA       | 0.97921 | 0       | 0       | 2.03943 | 9.27269 | 5.96447 | Up   |
| Arfgef3  | 4735.88 | 0.55703 | 0.20188 | 2.75922 | 0.00579  | 0.04174  | 3346.95 | 5028.82 | 3122.71 | 4931.34 | 6189    | 5796.47 | Up   |
| Tnfaip3  | 1805.47 | 0.77402 | 0.11714 | 6.60775 | 3.90E-11 | 4.73E-09 | 1261.23 | 1497.4  | 1238.75 | 2252.55 | 2324.35 | 2258.55 | Up   |
| Gm33056  | 150.395 | -1.2468 | 0.44215 | -2.8199 | 0.0048   | 0.03622  | 237.949 | 106.534 | 290.439 | 87.6955 | 51.5149 | 128.236 | Down |
| Olig3    | 262.568 | -1.796  | 0.37714 | -4.7623 | 1.91E-06 | 6.91E-05 | 532.692 | 204.191 | 486.339 | 134.602 | 81.3936 | 136.189 | Down |
| Ifngn1   | 9341.79 | 0.32836 | 0.11529 | 2.84819 | 0.0044   | 0.03395  | 9116.47 | 7876.64 | 7856.47 | 11009.9 | 10704.8 | 9486.49 | Up   |
| Slc35d3  | 197.828 | -2.3331 | 0.33165 | -7.0349 | 1.99E-12 | 3.07E-10 | 397.56  | 189.394 | 403.496 | 62.2026 | 59.7573 | 74.5559 | Down |
| Pex7     | 3611.16 | -0.3382 | 0.13911 | -2.4313 | 0.01504  | 0.08356  | 4221.39 | 3445.6  | 4430.66 | 3347.72 | 2874.53 | 3347.06 | Down |
| Ahi1     | 832.935 | -0.3945 | 0.13555 | -2.9105 | 0.00361  | 0.0295   | 956.691 | 878.909 | 1002.89 | 670.972 | 678.967 | 809.18  | Down |
| Myb      | 1597.48 | -1.0816 | 0.26258 | -4.1192 | 3.80E-05 | 0.00083  | 1920.24 | 1593.08 | 2996    | 1177.77 | 765.512 | 1132.26 | Down |
| Sgk1     | 15018.7 | 0.68174 | 0.23325 | 2.92277 | 0.00347  | 0.02857  | 11175.8 | 13070.2 | 10358.3 | 20987.8 | 22585.2 | 11934.9 | Up   |
| Gm8540   | 2.6793  | 4.89474 | 2.07782 | 2.35571 | 0.01849  | NA       | 0       | 0       | 0       | 1.01971 | 4.12119 | 10.9349 | Up   |
| Raet1e   | 3.0323  |         |         |         |          |          |         |         |         |         |         |         |      |

|          |         |         |         |         |          |          |         |         |         |         |         |         |      |
|----------|---------|---------|---------|---------|----------|----------|---------|---------|---------|---------|---------|---------|------|
| Epb41I2  | 8575.52 | 0.26936 | 0.09528 | 2.82708 | 0.0047   | 0.03578  | 7575.19 | 7800.69 | 7955.88 | 8773.63 | 10122.7 | 9225.05 | Up   |
| Gm4739   | 93.1154 | -0.6143 | 0.27749 | -2.2139 | 0.02683  | 0.12498  | 124.36  | 97.6565 | 115.981 | 59.1435 | 71.0906 | 90.4611 | Down |
| 9330159F | 170.521 | -1.4946 | 0.39229 | -3.81   | 0.00014  | 0.00242  | 219.344 | 140.073 | 395.699 | 112.169 | 78.3027 | 77.5381 | Down |
| Trdn     | 126.014 | -2.001  | 0.66955 | -2.9886 | 0.0028   | 0.02438  | 271.242 | 36.4979 | 297.261 | 36.7097 | 29.8787 | 84.4967 | Down |
| Rsph4a   | 3043.96 | -1.0532 | 0.30207 | -3.4867 | 0.00049  | 0.00635  | 5292.64 | 2622.92 | 4409.21 | 1995.58 | 1298.18 | 2645.24 | Down |
| Gm48018  | 53.325  | -1.6056 | 0.38655 | -4.1536 | 3.27E-05 | 0.00074  | 69.5241 | 60.1722 | 111.108 | 26.5126 | 26.7878 | 25.846  | Down |
| Dse      | 1777.75 | 0.31469 | 0.12006 | 2.6212  | 0.00876  | 0.05616  | 1731.25 | 1412.57 | 1610.08 | 1892.59 | 1950.35 | 2069.67 | Up   |
| Frk      | 1530.93 | 0.84143 | 0.10809 | 7.78489 | 6.98E-15 | 1.76E-12 | 1126.09 | 1007.14 | 1156.88 | 1875.26 | 2012.17 | 2008.04 | Up   |
| Amd2     | 176.681 | 0.54534 | 0.27121 | 2.01075 | 0.04435  | 0.17627  | 132.194 | 127.249 | 171.534 | 163.154 | 275.09  | 190.863 | Up   |
| Fam229b  | 295.288 | -1.0291 | 0.19092 | -5.3904 | 7.03E-08 | 4.17E-06 | 422.041 | 332.427 | 434.684 | 177.43  | 185.454 | 219.691 | Down |
| Gm16364  | 301.096 | -0.8553 | 0.18951 | -4.5133 | 6.38E-06 | 0.00019  | 464.147 | 370.898 | 328.449 | 208.022 | 216.363 | 218.697 | Down |
| Rev3l    | 2450.86 | -0.3327 | 0.14684 | -2.2657 | 0.02347  | 0.11357  | 2706.54 | 2450.29 | 3039.86 | 2283.14 | 1852.48 | 2372.87 | Down |
| 4930547N | 137.061 | -1.305  | 0.2949  | -4.425  | 9.64E-06 | 0.00027  | 221.302 | 135.141 | 229.037 | 73.4195 | 69.03   | 94.4375 | Down |
| Gm31848  | 21.2458 | -1.1592 | 0.57699 | -2.009  | 0.04454  | 0.17658  | 26.4387 | 19.7286 | 41.909  | 9.17743 | 11.3333 | 18.8875 | Down |
| Mfsd4b3- | 161.426 | -0.919  | 0.28353 | -3.2413 | 0.00119  | 0.01264  | 230.115 | 149.937 | 253.403 | 91.7743 | 134.969 | 108.355 | Down |
| Mfsd4b5  | 141.414 | -1.5294 | 0.36872 | -4.1479 | 3.36E-05 | 0.00075  | 196.822 | 140.073 | 293.363 | 70.3603 | 49.4543 | 98.4138 | Down |
| Mfsd4b1  | 404.498 | -1.5095 | 0.30335 | -4.9762 | 6.49E-07 | 2.78E-05 | 752.035 | 353.142 | 691.011 | 226.377 | 164.848 | 239.573 | Down |
| Amd1     | 4934.64 | 0.58643 | 0.10821 | 5.41914 | 5.99E-08 | 3.59E-06 | 3684.78 | 3768.16 | 4382.9  | 6119.31 | 5885.06 | 5767.64 | Up   |
| Cdk19    | 5876.19 | 0.92991 | 0.16539 | 5.6224  | 1.88E-08 | 1.29E-06 | 3577.06 | 4546.45 | 4012.54 | 9285.52 | 6673.24 | 7162.34 | Up   |
| Ddo      | 2930    | -1.0773 | 0.25851 | -4.1674 | 3.08E-05 | 0.0007   | 4726.66 | 2552.88 | 4648    | 2076.14 | 1431.08 | 2145.22 | Down |
| Mettl24  | 587.913 | -0.557  | 0.21825 | -2.5523 | 0.0107   | 0.06509  | 765.744 | 493.215 | 841.103 | 477.227 | 448.18  | 502.01  | Down |
| Cdc40    | 1943.21 | 0.30547 | 0.12161 | 2.51186 | 0.01201  | 0.0706   | 1818.4  | 1616.76 | 1779.67 | 1924.2  | 2182.17 | 2338.07 | Up   |
| AK9      | 1828.94 | -1.147  | 0.182   | -6.3024 | 2.93E-10 | 2.90E-08 | 2677.17 | 2119.84 | 2763.07 | 1229.78 | 899.451 | 1284.35 | Down |
| Mical1   | 1450.65 | 0.45642 | 0.16762 | 2.72289 | 0.00647  | 0.04504  | 1181.91 | 1384.95 | 1102.3  | 1583.62 | 1998.78 | 1452.35 | Up   |
| Ppil6    | 3437.19 | -0.7022 | 0.30507 | -2.3016 | 0.02136  | 0.10682  | 5172.2  | 2705.78 | 4894.58 | 2943.92 | 1608.3  | 3298.35 | Down |
| Cd164    | 27365.7 | 0.31959 | 0.11233 | 2.84513 | 0.00444  | 0.03421  | 24686   | 25309.8 | 23045.1 | 29993.9 | 33667.1 | 27492.2 | Up   |
| Arm2     | 1028.57 | -0.9055 | 0.31212 | -2.901  | 0.00372  | 0.03015  | 1547.16 | 801.967 | 1674.41 | 877.22  | 474.968 | 885.724 | Down |
| Tdg-ps2  | 61.0187 | -2.446  | 0.66043 | -3.7036 | 0.00021  | 0.00335  | 152.757 | 136.127 | 20.4672 | 20.3943 | 16.4848 | 19.8816 | Down |
| Ostm1    | 3383.44 | 0.30646 | 0.08223 | 3.72702 | 0.00019  | 0.00312  | 2975.83 | 3030.31 | 3070.08 | 3631.2  | 3886.29 | 3706.92 | Up   |
| Cd24a    | 52229.9 | -0.7075 | 0.27385 | -2.5834 | 0.00978  | 0.06074  | 78281.2 | 42624.6 | 73451.8 | 43584.7 | 26762   | 48675.1 | Down |
| Gm40634  | 23.3412 | -1.3583 | 0.66129 | -2.0541 | 0.03997  | 0.16496  | 27.418  | 23.6743 | 49.706  | 6.11829 | 9.27269 | 23.8579 | Down |
| 4933404K | 16.7557 | -1.8965 | 0.64244 | -2.9521 | 0.00316  | 0.02666  | 22.5219 | 16.7693 | 39.9597 | 6.11829 | 7.21209 | 7.95263 | Down |
| Rtn4ip1  | 827.56  | -0.4198 | 0.19867 | -2.1131 | 0.03459  | 0.14932  | 969.421 | 794.076 | 1077.94 | 798.437 | 548.119 | 777.369 | Down |
| Bres     | 6908.54 | 0.20843 | 0.07595 | 2.74429 | 0.00606  | 0.04306  | 6385.45 | 6601.19 | 6244.44 | 7397.01 | 7534.57 | 7288.58 | Up   |
| Bves     | 36.4394 | -1.7754 | 0.65453 | -2.7125 | 0.00668  | 0.04603  | 81.2747 | 21.7015 | 66.2747 | 8.15772 | 13.3939 | 27.8342 | Down |
| Gpx4-ps2 | 4630.12 | -0.2103 | 0.107   | -1.9652 | 0.04939  | 0.18935  | 4751.14 | 5360.26 | 4789.32 | 4523.46 | 4392.16 | 3964.39 | Down |
| Gm48786  | 16.1911 | 1.41831 | 0.6383  | 2.22199 | 0.02628  | 0.12327  | 9.79213 | 8.87787 | 7.79702 | 13.2563 | 21.6363 | 35.7868 | Down |
| Ros1     | 163.264 | -1.2614 | 0.38421 | -3.2832 | 0.00103  | 0.01121  | 115.547 | 298.888 | 276.794 | 74.4392 | 118.484 | 95.4315 | Up   |
| Dcbld1   | 833.906 | -0.2866 | 0.1389  | -2.0632 | 0.03909  | 0.16252  | 884.229 | 1043.64 | 821.611 | 736.234 | 728.421 | 789.298 | Down |
| Nus1     | 7297.95 | 0.52179 | 0.10873 | 4.79905 | 1.59E-06 | 5.90E-05 | 6218.98 | 6127.7  | 5630.42 | 8272.95 | 9476.69 | 8060.98 | Up   |
| Man1a    | 6495.24 | 0.36528 | 0.17499 | 2.08751 | 0.03684  | 0.15625  | 5755.81 | 6741.26 | 4534.94 | 6394.63 | 8183.66 | 7361.15 | Up   |
| Tbcl1d32 | 1096.45 | -0.4437 | 0.18832 | -2.3562 | 0.01846  | 0.09694  | 1324.87 | 1032.79 | 1433.68 | 949.355 | 762.421 | 1075.59 | Down |
| Hsf2     | 1384.51 | -0.403  | 0.12269 | -3.2843 | 0.00102  | 0.01117  | 1548.14 | 1432.3  | 1749.46 | 1201.22 | 1133.33 | 1242.6  | Down |
| Pkib     | 477.868 | 0.45747 | 0.19503 | 2.34566 | 0.01899  | 0.09875  | 380.914 | 468.554 | 358.663 | 595.513 | 619.209 | 444.353 | Up   |
| Gcc2     | 4318.65 | 0.27468 | 0.10469 | 2.62373 | 0.0087   | 0.05587  | 3580.98 | 4108.48 | 4036.91 | 4438.82 | 4857.86 | 4888.88 | Up   |
| Ccdc138  | 961.503 | -0.8322 | 0.2434  | -3.4191 | 0.00063  | 0.0077   | 1246.54 | 930.203 | 1517.49 | 715.84  | 509.998 | 848.943 | Down |
| Sh3rf3   | 814.818 | -0.5002 | 0.14485 | -3.453  | 0.00055  | 0.00697  | 859.749 | 1095.92 | 908.353 | 629.164 | 707.815 | 687.902 | Down |
| Oit3     | 43.959  | -1.2754 | 0.54254 | -2.3508 | 0.01874  | 0.09789  | 63.6488 | 98.643  | 24.3657 | 25.4929 | 25.7575 | 25.846  | Down |
| Micu1    | 5837.91 | -0.3286 | 0.11782 | -2.789  | 0.00529  | 0.03895  | 6745.8  | 5692.69 | 7061.17 | 5227.06 | 4951.61 | 5349.14 | Down |
| Dnajb12  | 3215.39 | -0.3082 | 0.11497 | -2.6805 | 0.00735  | 0.04926  | 3892.37 | 3150.66 | 3629.51 | 2875.6  | 2811.68 | 2932.53 | Down |
| Ascc1    | 3588.09 | -0.3932 | 0.1501  | -2.6192 | 0.00881  | 0.05643  | 4012.81 | 3740.54 | 4468.67 | 3532.29 | 2591.2  | 3183.04 | Down |
| Chst3    | 893.116 | 0.62628 | 0.30126 | 2.07889 | 0.03763  | 0.15832  | 590.465 | 871.017 | 645.203 | 1097.21 | 1516.6  | 638.198 | Up   |
| Psap     | 60844.7 | 0.63819 | 0.1336  | 4.77701 | 1.78E-06 | 6.50E-05 | 48605.2 | 48639.9 | 45561.9 | 71536.1 | 86361.7 | 64363.6 | Up   |
| Slc29a3  | 979.324 | 0.41121 | 0.11443 | 3.59352 | 0.00033  | 0.00466  | 797.079 | 898.637 | 826.484 | 1075.8  | 1089.03 | 1188.92 | Up   |
| Pcbd1    | 951.524 | -0.544  | 0.1568  | -3.4698 | 0.00052  | 0.00666  | 1091.82 | 1023.91 | 1270.91 | 773.964 | 671.755 | 876.777 | Down |
| Sgpl1    | 4894.55 | 0.30054 | 0.1037  | 2.89818 | 0.00375  | 0.03033  | 4164.59 | 4752.62 | 4242.55 | 5084.3  | 5668.7  | 5454.51 | Up   |
| Tbata    | 317.776 | -3.1045 | 0.41572 | -7.4677 | 8.16E-14 | 1.66E-11 | 710.908 | 337.359 | 659.823 | 28.552  | 85.5148 | 84.4967 | Down |
| Npffr1   | 6.56485 | -2.1893 | 0.96056 | -2.2792 | 0.02266  | NA       | 7.8337  | 9.8643  | 14.6194 | 3.05914 | 1.0303  | 2.98224 | Down |
| Gm5424   | 468.452 | -0.3511 | 0.13573 | -2.5866 | 0.00969  | 0.06036  | 499.399 | 501.106 | 575.03  | 396.669 | 410.059 | 428.448 | Down |
| Fam241b  | 538.644 | -0.2962 | 0.14563 | -2.0339 | 0.04196  | 0.17007  | 584.59  | 623.424 | 573.081 | 488.443 | 538.846 | 423.477 | Down |
| Vps26a   | 5211.46 | 0.28958 | 0.08374 | 3.45794 | 0.00054  | 0.00687  | 4520.05 | 4808.84 | 4741.56 | 5629.85 | 5976.76 | 5591.69 | Up   |
| Kifbp    | 3280.47 | -0.2651 | 0.08654 | -3.0634 | 0.00219  | 0.0202   | 3654.42 | 3446.59 | 3642.18 | 2982.67 | 2869.38 | 3087.61 | Down |
| Stox1    | 478.923 | -0.4579 | 0.14966 | -3.0593 | 0.00222  | 0.02046  | 536.609 | 547.468 | 578.929 | 407.886 | 351.332 | 451.312 | Down |
| Pbld2    | 808.809 | 1.50681 | 0.25083 | 6.00722 | 1.89E-09 | 1.59E-07 | 401.477 | 496.174 | 365.485 | 1072.74 | 1639.2  | 877.771 | Up   |
| Pbld1    | 87.239  | 1.21074 | 0.33679 | 3.59498 | 0.00032  | 0.00465  | 47.0022 | 63.1315 | 47.7567 | 124.405 | 157.636 | 83.5026 | Up   |
| Dnajc12  | 1282.53 | -0.7442 | 0.13854 | -5.3721 | 7.78E-08 | 4.54E-06 | 1552.05 | 1525.02 | 1741.66 | 1003.4  | 826.299 | 1046.76 | Down |
| Gm32255  | 3.03629 | 5.07442 | 1.79239 | 2.83109 | 0.00464  | NA       | 0       | 0       | 0       | 7.138   | 4.12119 | 6.95855 | Up   |
| Gm32515  | 1.86121 | 4.36781 | 2.0965  | 2.08338 | 0.03722  | NA       | 0       | 0       | 0       | 2.03943 | 5.15149 | 3.97631 | Up   |
| Cabccoc1 | 540.335 | -1.1891 | 0.34118 | -3.4852 | 0.00049  | 0.00636  | 775.536 | 543.523 | 934.668 | 354.861 | 175.151 | 458.27  | Down |
| Rhobtb1  | 1131.15 | -0.644  | 0.20739 | -3.1053 | 0.0019   | 0.01801  | 1451.19 | 1091.98 | 1595.46 | 780.082 | 771.694 | 1096.47 | Down |
| Mrln     | 87.2244 | -1.118  | 0.33889 | -3.299  | 0.00097  | 0.01074  | 116.526 | 87.7922 | 153.991 | 63.2223 | 40.1816 | 61.6329 | Down |
| Fam13c   | 318.845 | 0.57564 | 0.24531 | 2.34657 | 0.01895  | 0.09856  | 202.697 | 344.264 | 221.24  | 371.176 | 432.725 | 340.969 | Up   |
| Phyhipl  | 74.4518 | -1.4511 | 0.30955 | -4.6879 | 2.76E-06 | 9.44E-05 | 108.693 | 88.7787 | 129.625 | 45.8872 | 32.9696 | 40.7572 | Down |
| Cisd1    | 2262.94 | -0.3775 | 0.11465 | -3.2928 | 0.00099  | 0.01094  | 2467.62 | 2523.29 | 2681.2  | 2115.91 | 1759.75 | 2029.91 | Down |
| lpmk     | 3091.82 | 0.36576 | 0.09886 | 3.69988 | 0.00022  | 0.00339  | 2539.1  | 2749.18 | 2817.65 | 3284.5  | 3652.41 | 3508.1  | Up   |
| Rsph14   | 726.361 | -1.2779 | 0.29474 | -4.3355 | 1.45E-05 | 0.00038  | 1235.77 | 660.908 | 1189.05 | 469.069 | 287.453 | 515.927 | Down |
| Rab36    | 1709    | -0.9051 | 0.22901 | -3.9524 | 7.74E-05 | 0.00151  | 2409.84 | 1634.51 | 2640.27 | 1338.89 | 899.451 | 1331.07 |      |

|           |         |         |         |         |          |          |         |         |         |         |         |         |      |
|-----------|---------|---------|---------|---------|----------|----------|---------|---------|---------|---------|---------|---------|------|
| Lss       | 393.487 | 0.36048 | 0.13948 | 2.58435 | 0.00976  | 0.06062  | 333.912 | 333.413 | 366.46  | 416.044 | 438.907 | 472.187 | Up   |
| Col6a2    | 10803.4 | 0.45634 | 0.1183  | 3.85735 | 0.00011  | 0.00208  | 9283.92 | 9300.06 | 8742.41 | 13558.1 | 13069.3 | 10866.3 | Up   |
| Col6a1    | 19543.1 | 0.43526 | 0.10014 | 4.34636 | 1.38E-05 | 0.00036  | 16399.9 | 17394.7 | 16057   | 24383.4 | 22139.1 | 20884.6 | Up   |
| Col18a1   | 478.545 | 0.29452 | 0.14082 | 2.09141 | 0.03649  | 0.15518  | 460.23  | 408.382 | 421.039 | 478.246 | 535.755 | 567.619 | Up   |
| Pofut2    | 3998.39 | -0.2263 | 0.08881 | -2.5481 | 0.01083  | 0.06552  | 4561.17 | 4211.07 | 4161.66 | 3709.72 | 3773.98 | 3572.72 | Down |
| Itgb2     | 8778.3  | 1.51843 | 0.2308  | 6.57896 | 4.74E-11 | 5.64E-09 | 4495.57 | 5563.46 | 3569.09 | 11701.2 | 17116.3 | 10224.1 | Up   |
| Tsppear   | 10.1873 | -2.1626 | 0.78208 | -2.7652 | 0.00569  | 0.04112  | 19.5843 | 13.81   | 16.5687 | 6.11829 | 2.0606  | 2.98224 | Down |
| Cfap410   | 1360.75 | -0.4832 | 0.18548 | -2.6054 | 0.00918  | 0.05806  | 1799.79 | 1212.32 | 1747.51 | 1214.48 | 1001.45 | 1188.92 | Down |
| Icosl     | 1225.72 | 0.55733 | 0.18931 | 2.94402 | 0.00324  | 0.02713  | 816.663 | 901.597 | 1257.27 | 1377.63 | 1613.45 | 1387.73 | Up   |
| Gatd3a    | 1610.45 | -0.2296 | 0.09905 | -2.3182 | 0.02044  | 0.10378  | 1790    | 1641.42 | 1783.57 | 1550.99 | 1442.42 | 1454.34 | Down |
| Gm30122   | 233.468 | -0.3993 | 0.16896 | -2.3634 | 0.01811  | 0.09593  | 246.762 | 274.227 | 275.82  | 197.825 | 186.484 | 219.691 | Down |
| Cstb      | 4065.46 | 0.48474 | 0.10058 | 4.81927 | 1.44E-06 | 5.48E-05 | 3509.5  | 3265.08 | 3391.7  | 4778.38 | 5072.16 | 4375.93 | Up   |
| Gm47015   | 118.231 | 1.5908  | 0.61297 | 2.59522 | 0.00945  | 0.05928  | 23.5011 | 105.548 | 47.7567 | 139.701 | 317.332 | 75.55   | Up   |
| Mier2     | 1081.85 | -0.2562 | 0.11985 | -2.138  | 0.03252  | 0.14303  | 1172.12 | 1169.91 | 1190.99 | 1096.19 | 903.572 | 958.292 | Down |
| Cfd       | 533.736 | -5.776  | 1.57963 | -3.6565 | 0.00026  | 0.00387  | 2876.93 | 85.8194 | 182.255 | 20.3943 | 35.0301 | 1.98816 | Down |
| Abca7     | 3902.79 | 0.37824 | 0.13111 | 2.88496 | 0.00391  | 0.03122  | 3012.06 | 3814.52 | 3355.64 | 4477.57 | 4724.95 | 4031.98 | Up   |
| Gpx4      | 17145.9 | -0.2521 | 0.10091 | -2.4983 | 0.01248  | 0.07258  | 17580.8 | 20188.3 | 18151.5 | 16417.4 | 15762.5 | 14775   | Down |
| Sbno2     | 6286.94 | 0.39695 | 0.11613 | 3.41804 | 0.00063  | 0.00772  | 5490.45 | 5852.49 | 4939.41 | 6675.05 | 7781.84 | 6982.41 | Up   |
| Cbarp     | 1091.56 | -0.911  | 0.15955 | -5.7098 | 1.13E-08 | 8.23E-07 | 1491.34 | 1192.59 | 1591.57 | 676.071 | 828.36  | 769.417 | Down |
| Cirbp     | 3304.74 | -0.2699 | 0.11715 | -2.3038 | 0.02123  | 0.10646  | 3280.36 | 3678.4  | 3879.99 | 2943.92 | 3246.47 | 2799.33 | Down |
| Fam174c   | 449.462 | -0.338  | 0.14387 | -2.3497 | 0.01879  | 0.09806  | 534.65  | 510.971 | 460.024 | 433.379 | 375.029 | 382.72  | Down |
| Ndufs7    | 2967.35 | -0.3099 | 0.11293 | -2.7442 | 0.00607  | 0.04306  | 3471.31 | 3195.05 | 3188.01 | 2857.24 | 2709.68 | 2382.81 | Down |
| Pcspk4    | 407.973 | -0.6953 | 0.2548  | -2.7289 | 0.00635  | 0.0445   | 489.606 | 348.21  | 675.417 | 344.664 | 295.696 | 294.247 | Down |
| Reep6     | 2256.69 | -0.7079 | 0.24987 | -2.833  | 0.00461  | 0.03526  | 2779.01 | 2352.63 | 3266.95 | 1918.08 | 1093.15 | 2130.31 | Down |
| Plk5      | 419.062 | -1.1447 | 0.34079 | -3.359  | 0.00078  | 0.00903  | 714.825 | 328.481 | 688.087 | 301.836 | 169.999 | 311.147 | Down |
| Mob3a     | 2372.43 | 0.28977 | 0.09128 | 3.17465 | 0.0015   | 0.015    | 2142.52 | 2224.4  | 2037.95 | 2639.02 | 2674.65 | 2516.01 | Up   |
| Izum4     | 1240.53 | -0.2714 | 0.11489 | -2.3621 | 0.01817  | 0.09611  | 1231.85 | 1444.13 | 1394.69 | 1105.37 | 1092.12 | 1175    | Down |
| Lsm7      | 708.039 | -0.3228 | 0.12346 | -2.6144 | 0.00894  | 0.05698  | 852.894 | 734.89  | 772.879 | 609.79  | 661.452 | 616.329 | Down |
| Sppi2b    | 2072.1  | -0.3894 | 0.13124 | -2.9674 | 0.003    | 0.02572  | 2459.78 | 2029.09 | 2561.32 | 1909.93 | 1701.02 | 1771.45 | Down |
| Tmprss9   | 34.5732 | -1.4815 | 0.45805 | -3.2343 | 0.00122  | 0.01289  | 62.6696 | 35.5115 | 54.5791 | 22.4337 | 12.3636 | 19.8816 | Down |
| Thop1     | 1280.53 | -0.3749 | 0.14286 | -2.6245 | 0.00868  | 0.05576  | 1465.88 | 1295.18 | 1576.95 | 1298.95 | 982.905 | 1123.31 | Down |
| Zfr2      | 420.038 | -0.6996 | 0.15673 | -4.4638 | 8.05E-06 | 0.00024  | 542.484 | 484.337 | 533.121 | 320.19  | 280.241 | 359.856 | Down |
| Tjp3      | 5295.13 | 0.66431 | 0.13222 | 5.02414 | 5.06E-07 | 2.25E-05 | 4737.43 | 3629.07 | 3924.82 | 6866.76 | 6215.79 | 6396.9  | Up   |
| Pip5k1c   | 4810.37 | 0.2682  | 0.1057  | 2.53737 | 0.01117  | 0.06704  | 4323.22 | 4694.42 | 4075.89 | 5117.95 | 5632.64 | 5018.11 | Up   |
| Mfsd12    | 511.541 | 0.80483 | 0.16004 | 5.02882 | 4.94E-07 | 2.20E-05 | 401.477 | 357.088 | 358.663 | 657.716 | 735.633 | 558.672 | Up   |
| Celf5     | 41.4988 | 1.282   | 0.37662 | 3.404   | 0.00066  | 0.00801  | 20.5635 | 29.5929 | 22.4164 | 47.9266 | 63.8785 | 64.6151 | Up   |
| Gna15     | 426.526 | 0.83744 | 0.24729 | 3.38643 | 0.00071  | 0.00836  | 327.057 | 375.83  | 215.393 | 569.001 | 629.512 | 442.365 | Up   |
| Gm47561   | 1.96171 | -4.3938 | 0.27676 | -2.1157 | 0.03437  | NA       | 5.87528 | 3.94572 | 1.94925 | 0       | 0       | 0       | Down |
| 170002811 | 4.74168 | -3.6999 | 1.50892 | -2.452  | 0.01421  | NA       | 7.8337  | 4.93215 | 13.6448 | 2.03943 | 0       | 0       | Down |
| Slc41a2   | 1549.21 | 0.56352 | 0.13395 | 4.2069  | 2.59E-05 | 0.00061  | 1281.79 | 1367.19 | 1102.3  | 1796.74 | 2023.51 | 1723.73 | Up   |
| Aldh1l2   | 144.547 | -0.8146 | 0.25426 | -3.2039 | 0.00136  | 0.01391  | 210.531 | 189.394 | 153.016 | 127.464 | 84.4845 | 102.39  | Down |
| Nuak1     | 1047.95 | 0.54605 | 0.18532 | 2.94656 | 0.00321  | 0.02697  | 650.197 | 999.253 | 906.403 | 1293    | 1310.54 | 1128.28 | Up   |
| Gm47962   | 45.3647 | -0.9709 | 0.39556 | -2.4546 | 0.0141   | 0.07973  | 58.7528 | 59.1858 | 62.3761 | 24.4732 | 22.6666 | 44.7335 | Down |
| Cry1      | 1507.61 | -0.5159 | 0.21857 | -2.3603 | 0.01826  | 0.09622  | 1643.12 | 1527.98 | 2151.98 | 1151.26 | 978.784 | 1592.51 | Down |
| Btbd11    | 577.834 | -0.4717 | 0.20739 | -2.2744 | 0.02294  | 0.11172  | 666.844 | 544.509 | 803.093 | 531.271 | 389.453 | 531.832 | Down |
| Bpifc     | 5.91515 | -2.272  | 0.96138 | -2.3633 | 0.01811  | NA       | 9.79213 | 9.8643  | 9.74627 | 20.3943 | 2.0606  | 1.98816 | Down |
| Hsp90b1   | 11283.2 | 0.34081 | 0.15599 | 2.18491 | 0.0289   | 0.13179  | 11770.1 | 9204.37 | 8895.42 | 11341.3 | 12150.3 | 14337.6 | Up   |
| Nt5dc3    | 1532.26 | -0.5619 | 0.14261 | -3.94   | 8.15E-05 | 0.00157  | 1987.8  | 1537.84 | 1955.1  | 1153.3  | 1265.21 | 1294.29 | Down |
| Gnptab    | 2563.69 | 0.84376 | 0.17118 | 4.92919 | 8.26E-07 | 3.39E-05 | 2157.21 | 1790.37 | 1556.48 | 2812.37 | 3302.11 | 3763.58 | Up   |
| Spic      | 68.6728 | 1.1287  | 0.39015 | 2.89299 | 0.00382  | 0.03073  | 34.2724 | 44.3893 | 50.6806 | 86.6758 | 61.8179 | 134.201 | Up   |
| Slc5a8    | 122.031 | -3.2151 | 1.50106 | -2.1419 | 0.0322   | 0.14205  | 449.459 | 5.91858 | 205.646 | 17.3352 | 4.12119 | 49.7039 | Down |
| Gas2l3    | 200.632 | 1.0339  | 0.21893 | 4.72257 | 2.33E-06 | 8.28E-05 | 157.653 | 120.344 | 116.955 | 273.284 | 303.938 | 231.62  | Up   |
| Apa1      | 1795.47 | 0.50582 | 0.11976 | 4.22357 | 2.40E-05 | 0.00057  | 1369.92 | 1539.82 | 1541.86 | 2058.8  | 2314.05 | 1948.39 | Up   |
| Gm4800    | 16.95   | -1.676  | 0.68777 | -2.4368 | 0.01482  | 0.08274  | 13.709  | 36.4979 | 27.2896 | 5.09857 | 6.18179 | 12.923  | Down |
| Cfap54    | 2154.52 | -0.8926 | 0.30559 | -2.9211 | 0.00349  | 0.02872  | 3157.96 | 1824.89 | 3418.99 | 1528.55 | 949.935 | 2046.81 | Down |
| Gm3571    | 768.247 | 0.38966 | 0.14266 | 2.73148 | 0.00631  | 0.04429  | 660.969 | 743.768 | 590.624 | 837.186 | 947.875 | 829.061 | Up   |
| Fgd6      | 2176.63 | 0.40008 | 0.11069 | 3.61428 | 0.0003   | 0.00439  | 1841.9  | 2045.86 | 1742.63 | 2451.39 | 2365.57 | 2612.44 | Up   |
| Ndufa12   | 1795.43 | -0.3003 | 0.10515 | -2.8557 | 0.00429  | 0.0334   | 2136.64 | 1895.92 | 1912.22 | 1689.67 | 1579.45 | 1558.72 | Down |
| Tmcc3     | 411.525 | -0.4265 | 0.15403 | -2.7689 | 0.00563  | 0.04074  | 522.9   | 417.26  | 475.618 | 356.9   | 328.665 | 367.809 | Down |
| Cep83     | 4521    | -0.4978 | 0.22244 | -2.2381 | 0.02522  | 0.11948  | 5907.59 | 4013.78 | 5958.87 | 3917.74 | 2790.05 | 4537.97 | Down |
| Plxnc1    | 1657.35 | 0.37105 | 0.14883 | 2.49303 | 0.01267  | 0.07344  | 1312.15 | 1688.77 | 1335.24 | 1789.6  | 2066.78 | 1751.57 | Up   |
| Cradl     | 818.151 | -0.4383 | 0.17288 | -2.5352 | 0.01124  | 0.06739  | 1005.65 | 740.809 | 1077.94 | 727.057 | 665.573 | 691.879 | Down |
| Gm48882   | 22.7247 | -1.455  | 0.52874 | -2.7518 | 0.00593  | 0.04236  | 33.2932 | 30.5793 | 36.0612 | 16.3154 | 6.18179 | 13.9171 | Down |
| 5730420D  | 73.956  | -0.9856 | 0.32739 | -3.0104 | 0.00261  | 0.0231   | 88.1291 | 91.738  | 115.006 | 61.1829 | 33.9998 | 53.6802 | Down |
| 4732465J  | 91.1633 | -0.7384 | 0.25218 | -2.928  | 0.00341  | 0.02826  | 98.9005 | 113.439 | 129.625 | 72.3998 | 67.9997 | 64.6151 | Down |
| Gm47719   | 15.3264 | -1.3991 | 0.68062 | -2.0556 | 0.03982  | 0.16461  | 23.5011 | 26.6336 | 16.5687 | 3.05914 | 9.27269 | 12.923  | Down |
| Gm47725   | 64.1671 | -1.3621 | 0.48997 | -2.7801 | 0.00543  | 0.0397   | 90.0876 | 85.8194 | 101.361 | 35.69   | 13.3939 | 58.6506 | Down |
| Btg1      | 9764.76 | 0.22668 | 0.10355 | 2.18908 | 0.02859  | 0.13078  | 8624.91 | 9359.24 | 9013.35 | 11183.2 | 10870.7 | 9537.19 | Up   |
| Dcn       | 5182.7  | -0.7245 | 0.18393 | -3.9389 | 8.18E-05 | 0.00157  | 7330.39 | 5531.9  | 6509.54 | 4645.82 | 4006.83 | 3071.7  | Down |
| Lum       | 557.753 | -0.5533 | 0.22964 | -2.4095 | 0.01598  | 0.08743  | 797.079 | 497.161 | 695.884 | 480.286 | 518.24  | 357.868 | Down |
| Atp2b1    | 8032.65 | 0.30883 | 0.10801 | 2.85932 | 0.00425  | 0.03318  | 6756.57 | 7053.96 | 7718.07 | 8518.7  | 8475.24 | 9673.38 | Up   |
| B530045E  | 127.151 | -0.6819 | 0.32368 | -2.1068 | 0.03514  | 0.15104  | 170.383 | 189.394 | 110.133 | 83.6166 | 130.848 | 78.5322 | Down |
| Nts       | 12.833  | -1.9069 | 0.95521 | -1.9963 | 0.0459   | 0.18039  | 43.0854 | 13.81   | 3.89851 | 6.11829 | 4.12119 | 5.96447 | Down |
| Alx1      | 28.6377 | -1.517  | 0.48063 | -3.1563 | 0.0016   | 0.01577  | 47.9814 | 38.4708 | 40.9343 | 16.3154 | 8.24239 | 19.8816 | Down |
| Gm15663   | 342.461 | 0.6004  | 0.27969 | 2.14666 | 0.03182  | 0.14062  | 240.886 | 387.667 | 188.103 | 387.492 | 471.877 | 378.744 | Up   |
| Gm36283   | 284.384 | -0.4871 | 0.16635 | -2.9283 | 0.00341  | 0.02825  | 306.494 | 358.074 | 331.373 | 219.239 | 227.696 | 263.431 | Down |
| Csrp2     | 2582.13 | -1.034  | 0.19956 | -5.1815 | 2.20E-07 | 1.10E-05 | 3641.69 | 2598.26 | 4169.46 | 1887.49 | 1439.33 | 1756.54 |      |

|           |         |         |         |         |          |          |         |         |         |         |         |         |      |
|-----------|---------|---------|---------|---------|----------|----------|---------|---------|---------|---------|---------|---------|------|
| Lrrc10    | 16.7935 | -3.9817 | 1.42524 | -2.7937 | 0.00521  | 0.03858  | 49.9399 | 1.97286 | 42.8836 | 0       | 0       | 5.96447 | Down |
| Lyz2      | 698680  | 0.72745 | 0.15027 | 4.84109 | 1.29E-06 | 4.99E-05 | 547723  | 584014  | 446780  | 837233  | 996183  | 780150  | Up   |
| Gm48903   | 31.8494 | -3.8861 | 0.74984 | -5.1826 | 2.19E-07 | 1.09E-05 | 33.2932 | 44.3893 | 101.361 | 2.03943 | 2.0606  | 7.95263 | Down |
| Mdm2      | 5914.18 | -0.2654 | 0.12048 | -2.2032 | 0.02758  | 0.12737  | 6663.54 | 5830.79 | 6876    | 5359.62 | 4898.04 | 5857.11 | Down |
| Slc35e3   | 2486.25 | -0.5814 | 0.20382 | -2.8527 | 0.00434  | 0.0337   | 3200.07 | 2217.49 | 3524.25 | 2089.4  | 1652.6  | 2233.69 | Down |
| Gm40773   | 65.3476 | -0.7842 | 0.28109 | -2.7899 | 0.00527  | 0.03889  | 80.2954 | 92.7244 | 75.0463 | 48.9463 | 46.3634 | 48.7098 | Down |
| Mdm1      | 1396.54 | -0.9756 | 0.16776 | -5.8157 | 6.04E-09 | 4.68E-07 | 1896.74 | 1650.3  | 2007.73 | 1011.56 | 755.209 | 1057.7  | Down |
| Gm47461   | 12.2474 | 1.55863 | 0.65853 | 2.36681 | 0.01794  | 0.0953   | 8.81291 | 4.93215 | 4.87314 | 18.3549 | 20.606  | 15.9053 | Up   |
| Gm33677   | 39.1353 | -1.0087 | 0.40178 | -2.5105 | 0.01206  | 0.07084  | 53.8567 | 59.1858 | 43.8582 | 18.3549 | 25.7575 | 33.7987 | Down |
| Gm47480   | 14.4258 | -2.7559 | 0.71707 | -3.8433 | 0.00012  | 0.00218  | 22.5219 | 19.7286 | 33.1373 | 2.03943 | 5.15149 | 3.97631 | Down |
| Gm34045   | 65.791  | -0.7981 | 0.35542 | -2.2454 | 0.02474  | 0.11779  | 84.2123 | 57.2129 | 109.158 | 56.0843 | 45.3331 | 42.7454 | Down |
| Helb      | 219.892 | 0.68608 | 0.16344 | 4.19781 | 2.70E-05 | 0.00063  | 174.3   | 165.72  | 165.687 | 255.948 | 283.332 | 274.366 | Up   |
| Irak3     | 614.315 | 0.46428 | 0.12836 | 3.61701 | 0.0003   | 0.00435  | 478.835 | 568.183 | 501.933 | 696.465 | 736.663 | 703.808 | Up   |
| Wif1      | 333.756 | -0.9172 | 0.23685 | -3.8724 | 0.00011  | 0.00198  | 363.288 | 367.938 | 577.954 | 211.081 | 258.605 | 223.668 | Down |
| Gm48410   | 20.2468 | -1.9894 | 0.61879 | -3.215  | 0.0013   | 0.0135   | 36.2309 | 28.6065 | 32.1627 | 13.2563 | 8.24239 | 2.98224 | Down |
| 4930432C  | 25.5024 | -1.4747 | 0.65244 | -2.2603 | 0.0238   | 0.11477  | 59.732  | 14.7964 | 38.0105 | 8.15772 | 14.4242 | 17.8934 | Down |
| Gns       | 21052.2 | 0.45015 | 0.08052 | 5.59026 | 2.27E-08 | 1.49E-06 | 18439.6 | 17567.3 | 17375.7 | 23395.3 | 25260.9 | 24274.4 | Up   |
| Gm50454   | 102.168 | -0.6208 | 0.25034 | -2.4798 | 0.01314  | 0.07561  | 143.944 | 114.426 | 113.057 | 91.7743 | 76.2421 | 73.5618 | Down |
| Tbk1      | 4157.87 | 0.26713 | 0.09152 | 2.9187  | 0.00351  | 0.02889  | 3866.91 | 3603.43 | 3851.73 | 4281.78 | 4694.04 | 4649.31 | Up   |
| D930020B  | 158.502 | -1.6102 | 0.34247 | -4.7018 | 2.58E-06 | 8.90E-05 | 223.261 | 164.734 | 328.449 | 80.5575 | 54.6058 | 99.4079 | Down |
| Gm35865   | 18.0291 | -2.5003 | 0.72915 | -3.429  | 0.00061  | 0.0075   | 28.3972 | 13.81   | 49.706  | 4.07886 | 7.21209 | 4.97039 | Down |
| Gm48877   | 12.0363 | -2.5967 | 1.30889 | -1.9839 | 0.04727  | 0.18417  | 21.5427 | 37.4843 | 2.92388 | 0       | 9.27269 | 0.99408 | Down |
| Slc16a7   | 2887.14 | -0.6573 | 0.25882 | -2.5396 | 0.0111   | 0.0667   | 3182.44 | 2680.13 | 4738.64 | 2152.62 | 1675.27 | 2893.76 | Down |
| Marchf9   | 744.506 | -0.4147 | 0.15455 | -2.683  | 0.0073   | 0.04902  | 848.977 | 779.279 | 923.947 | 738.274 | 609.937 | 566.625 | Down |
| Cdk4      | 5790.63 | -0.2789 | 0.09527 | -2.9272 | 0.00342  | 0.02831  | 6248.36 | 5985.65 | 6811.67 | 5428.96 | 5070.1  | 5199.03 | Down |
| B4galnt1  | 5147.66 | 0.42998 | 0.1042  | 4.12639 | 3.69E-05 | 0.00081  | 4472.06 | 4039.43 | 4647.02 | 6276.35 | 5607.91 | 5843.19 | Up   |
| Slc26a10  | 471.158 | 0.49468 | 0.25097 | 1.97109 | 0.04871  | 0.18768  | 322.161 | 357.088 | 494.136 | 578.178 | 672.785 | 402.602 | Up   |
| Dtx3      | 5841.43 | -0.3145 | 0.08575 | -3.6674 | 0.00025  | 0.00375  | 6548.97 | 6278.62 | 6599.2  | 5488.11 | 5006.22 | 5127.46 | Down |
| Pip4k2c   | 467.788 | 0.45507 | 0.16343 | 2.78457 | 0.00536  | 0.0393   | 431.833 | 382.735 | 369.384 | 556.764 | 462.604 | 603.406 | Up   |
| Arhgap9   | 1156.44 | 0.47917 | 0.23122 | 2.07236 | 0.03823  | 0.16001  | 922.418 | 1256.71 | 719.275 | 1263.43 | 1621.69 | 1155.12 | Up   |
| Lrp1      | 14754.2 | 0.45019 | 0.14559 | 3.09214 | 0.00199  | 0.01871  | 11413.7 | 13370.1 | 12628.2 | 16942.6 | 19774.5 | 14396.2 | Up   |
| Stat6     | 9805.06 | 0.21196 | 0.08538 | 2.48255 | 0.01304  | 0.07515  | 9405.34 | 9008.08 | 8844.74 | 10121.7 | 11093.2 | 10357.3 | Up   |
| Sdr9c7    | 30.6513 | -1.6385 | 0.43647 | -3.7539 | 0.00017  | 0.00287  | 40.1477 | 48.3351 | 50.6806 | 18.3549 | 15.4545 | 10.9349 | Down |
| Ptges3    | 9037.37 | -0.3471 | 0.12331 | -2.8146 | 0.00488  | 0.0367   | 11119   | 9083.04 | 10155.6 | 8274.99 | 7195.6  | 8395.99 | Down |
| Coq10a    | 2008.53 | -0.2254 | 0.0835  | -2.6992 | 0.00695  | 0.0473   | 2122.93 | 2216.51 | 2155.88 | 1838.55 | 1850.42 | 1866.88 | Down |
| Ankrd52   | 548.945 | 0.3968  | 0.15401 | 2.57652 | 0.00998  | 0.06182  | 475.897 | 457.703 | 488.288 | 555.745 | 590.361 | 725.677 | Up   |
| Ikzf4     | 232.921 | -0.8048 | 0.23997 | -3.354  | 0.0008   | 0.00918  | 286.909 | 375.83  | 226.114 | 166.214 | 155.575 | 186.887 | Down |
| Suox      | 1171.64 | -0.3091 | 0.14227 | -2.1725 | 0.02982  | 0.13447  | 1312.15 | 1465.83 | 1112.05 | 1108.43 | 1032.36 | 999.049 | Down |
| Cdk2      | 1459.77 | 0.36812 | 0.10189 | 3.61297 | 0.0003   | 0.00441  | 1206.39 | 1324.77 | 1292.36 | 1677.43 | 1698.96 | 1558.72 | Up   |
| Dnajc14   | 3448.68 | 0.25188 | 0.08906 | 2.82816 | 0.00468  | 0.03569  | 3189.3  | 3157.56 | 3098.34 | 3518.02 | 3870.83 | 3858.02 | Up   |
| Cd63      | 17678.2 | 0.36905 | 0.12373 | 2.98264 | 0.00286  | 0.02477  | 14071.3 | 16713.1 | 15503.4 | 20305.6 | 21737.2 | 17738.3 | Up   |
| Itga7     | 6059.49 | 0.77757 | 0.16114 | 4.82555 | 1.40E-06 | 5.33E-05 | 4281.12 | 5129.43 | 3984.28 | 7430.66 | 8963.6  | 6567.88 | Up   |
| Ctdsp2-ps | 128.774 | 0.61245 | 0.25267 | 2.42395 | 0.01535  | 0.08491  | 93.0252 | 84.8329 | 127.676 | 142.76  | 149.393 | 174.958 | Up   |
| Vmn2r87   | 16.2967 | 1.90586 | 0.58092 | 3.28079 | 0.00104  | 0.01128  | 5.87528 | 8.87787 | 5.84776 | 24.4732 | 28.8484 | 23.8579 | Down |
| 8430429K  | 289.138 | -0.7167 | 0.18729 | -3.8265 | 0.00013  | 0.0023   | 348.6   | 330.454 | 399.597 | 217.199 | 186.484 | 252.496 | Down |
| Inpp5j    | 77.7241 | -0.8855 | 0.35019 | -2.5285 | 0.01146  | 0.06807  | 108.693 | 80.8872 | 113.057 | 57.104  | 35.0301 | 71.5737 | Down |
| Osbp2     | 63.6171 | -1.7764 | 0.49703 | -3.574  | 0.00035  | 0.0049   | 135.131 | 39.4572 | 120.854 | 25.4929 | 31.9393 | 28.8283 | Down |
| 4921536K  | 139.998 | -0.7494 | 0.33229 | -2.2551 | 0.02413  | 0.11597  | 197.801 | 124.29  | 204.672 | 101.971 | 71.0906 | 140.165 | Down |
| Dusp18    | 3834.83 | -0.7273 | 0.17815 | -4.0825 | 4.46E-05 | 0.00095  | 5284.81 | 3875.68 | 5184.04 | 2833.79 | 2442.84 | 3387.82 | Down |
| Slc35e4   | 1705.35 | -0.3006 | 0.11707 | -2.5676 | 0.01024  | 0.06303  | 2002.49 | 1668.05 | 1976.54 | 1569.34 | 1488.78 | 1526.9  | Down |
| Tcn2      | 13030.8 | 0.24838 | 0.10331 | 2.40423 | 0.01621  | 0.08846  | 12741.5 | 11204.9 | 11789.1 | 15035.7 | 14283   | 13130.8 | Up   |
| 4930556J  | 22.176  | -1.8865 | 0.58775 | -3.2097 | 0.00133  | 0.0137   | 25.4595 | 29.5929 | 49.706  | 11.2169 | 5.15149 | 11.9289 | Down |
| Ccdc157   | 3794.63 | -0.4364 | 0.17671 | -2.4696 | 0.01352  | 0.07723  | 4709.03 | 3588.63 | 4795.17 | 3326.31 | 2642.72 | 3705.92 | Down |
| Osm       | 934.602 | 1.49752 | 0.60742 | 2.46537 | 0.01369  | 0.07797  | 335.87  | 745.741 | 384.978 | 1408.23 | 2151.26 | 581.536 | Up   |
| Lif       | 753.626 | 1.04239 | 0.2752  | 3.78778 | 0.00015  | 0.00259  | 379.935 | 608.627 | 489.263 | 948.335 | 1387.81 | 707.784 | Up   |
| Mttrm3    | 5661.29 | 0.21356 | 0.07405 | 2.88409 | 0.00393  | 0.03128  | 5238.79 | 5240.9  | 5249.34 | 5961.25 | 6237.43 | 6040.02 | Up   |
| Nipsnap1  | 1363.31 | -0.3747 | 0.1403  | -2.6708 | 0.00757  | 0.05031  | 1596.12 | 1530.94 | 1491.18 | 1325.63 | 999.389 | 1236.63 | Down |
| Kremen1   | 3996.95 | -0.3842 | 0.1654  | -2.3232 | 0.02017  | 0.1028   | 5017.49 | 3646.83 | 4914.07 | 3354.86 | 3122.83 | 3925.62 | Down |
| Dbnl      | 7241.87 | 0.52539 | 0.12718 | 4.13108 | 3.61E-05 | 0.0008   | 5958.51 | 6253.96 | 5600.21 | 8498.3  | 9651.84 | 7488.39 | Up   |
| Polm      | 1290.5  | 0.41759 | 0.11161 | 3.74138 | 0.00018  | 0.00298  | 1049.72 | 1076.19 | 1189.05 | 1507.14 | 1536.17 | 1384.75 | Up   |
| Gck       | 511.504 | -1.1394 | 0.32438 | -3.5126 | 0.00044  | 0.00587  | 850.936 | 386.68  | 873.266 | 333.447 | 237.999 | 386.697 | Down |
| Myo1g     | 1991.75 | 0.65828 | 0.20567 | 3.2007  | 0.00137  | 0.01402  | 1199.54 | 2048.81 | 1386.89 | 2397.35 | 2607.69 | 2310.24 | Up   |
| Snhg15    | 427.774 | 0.37204 | 0.17501 | 2.12581 | 0.03352  | 0.14625  | 363.288 | 413.314 | 342.094 | 535.35  | 509.998 | 402.602 | Up   |
| Ramp3     | 320.417 | -0.5094 | 0.25865 | -1.9693 | 0.04892  | 0.18832  | 320.203 | 320.59  | 488.288 | 257.988 | 328.665 | 206.768 | Down |
| Adcy1     | 94.3385 | -0.9629 | 0.29842 | -3.2266 | 0.00125  | 0.01314  | 122.402 | 97.6565 | 153.991 | 55.0646 | 77.2724 | 59.6447 | Down |
| Igfbp3    | 2798.16 | -0.8612 | 0.31363 | -2.746  | 0.00603  | 0.04291  | 5400.36 | 3181.24 | 2246.52 | 2479.95 | 2053.38 | 1427.5  | Down |
| Gm11992   | 849.509 | -1.0383 | 0.32707 | -3.1744 | 0.0015   | 0.015    | 1460.01 | 672.745 | 1295.28 | 608.77  | 355.453 | 704.802 | Down |
| Abca13    | 43.3505 | -1.0445 | 0.47557 | -2.1963 | 0.02807  | 0.12909  | 62.6696 | 38.4708 | 74.0717 | 16.3154 | 27.8181 | 40.7572 | Down |
| Ikzf1     | 1627.4  | 0.31164 | 0.15272 | 2.04062 | 0.04129  | 0.16828  | 1227.93 | 1663.12 | 1465.84 | 1707    | 1994.66 | 1705.84 | Up   |
| 4930554G  | 70.6993 | 1.71814 | 0.52163 | 3.2938  | 0.00099  | 0.01091  | 19.5843 | 30.5793 | 48.7314 | 82.5969 | 60.7876 | 181.916 | Up   |
| Vstm2a    | 353.359 | 1.52758 | 0.39581 | 3.85939 | 0.00011  | 0.00206  | 106.734 | 303.82  | 135.473 | 396.669 | 720.179 | 457.276 | Up   |
| Akt2-ps   | 319.578 | 0.47182 | 0.17766 | 2.65573 | 0.00791  | 0.05202  | 279.076 | 243.648 | 280.693 | 374.235 | 317.332 | 422.483 | Up   |
| Gm12663   | 263.114 | 0.63381 | 0.17944 | 3.53209 | 0.00041  | 0.00556  | 199.759 | 226.879 | 192.002 | 335.486 | 347.211 | 277.348 | Up   |
| Egfr      | 1323.41 | -0.5533 | 0.19332 | -2.862  | 0.00421  | 0.03291  | 2017.18 | 1436.24 | 1268.96 | 1055.4  | 1004.54 | 1158.1  | Down |
| Plek      | 5470.02 | 1.26372 | 0.18869 | 6.69718 | 2.12E-11 | 2.75E-09 | 3067.87 | 3765.2  | 2816.67 | 6588.38 | 9664.2  | 6917.79 | Up   |
| Ppp3r1    | 74.0663 | 0.68385 | 0.2768  | 2.47058 | 0.01349  | 0.0771   | 65.6073 | 50.3079 | 54.5791 | 80.5575 | 98.9087 | 94.4375 | Up   |
| Wdr92     | 1355.5  | -0.4617 | 0.17291 | -2.6702 | 0.00758  | 0.05038  |         |         |         |         |         |         |      |

|          |         |         |         |         |          |          |         |         |         |         |         |         |      |
|----------|---------|---------|---------|---------|----------|----------|---------|---------|---------|---------|---------|---------|------|
| Wdpcp    | 1286.32 | -0.6024 | 0.24439 | -2.4649 | 0.0137   | 0.07804  | 1778.25 | 1126.5  | 1748.48 | 1038.07 | 755.209 | 1271.43 | Down |
| Otx1     | 161.592 | -2.0952 | 0.63699 | -3.2892 | 0.001    | 0.01104  | 423.999 | 95.6837 | 266.073 | 48.9463 | 18.5454 | 116.307 | Down |
| Tmem17   | 405.598 | -0.8024 | 0.18391 | -4.3631 | 1.28E-05 | 0.00034  | 567.943 | 424.165 | 554.563 | 333.447 | 276.12  | 277.348 | Down |
| Fam161a  | 3299.15 | -1.015  | 0.32341 | -3.1384 | 0.0017   | 0.01655  | 5263.27 | 2750.17 | 5228.88 | 2590.08 | 1247.69 | 2714.83 | Down |
| Pus10    | 1628.44 | 0.25643 | 0.10406 | 2.46416 | 0.01373  | 0.07817  | 1481.55 | 1386.92 | 1583.77 | 1698.85 | 1812.29 | 1807.23 | Up   |
| Cfap36   | 3888.73 | -0.3239 | 0.13544 | -2.3918 | 0.01677  | 0.09076  | 4535.71 | 3700.1  | 4734.74 | 3558.8  | 3154.77 | 3648.27 | Down |
| Ccdc88a  | 1389.18 | 0.49639 | 0.11956 | 4.15192 | 3.30E-05 | 0.00074  | 1108.47 | 1151.16 | 1197.82 | 1527.53 | 1811.26 | 1538.83 | Up   |
| Gm12089  | 22.0286 | 1.09732 | 0.53814 | 2.03909 | 0.04144  | 0.16869  | 18.605  | 8.87787 | 14.6194 | 34.6703 | 20.606  | 34.7927 | Up   |
| Clhc1    | 23.423  | -1.1545 | 0.48396 | -2.3856 | 0.01705  | 0.09185  | 37.2101 | 27.62   | 32.1627 | 10.1971 | 15.4545 | 17.8934 | Down |
| Acyp2    | 833.142 | -0.321  | 0.12762 | -2.5153 | 0.01189  | 0.07008  | 855.832 | 925.271 | 995.094 | 770.904 | 774.784 | 676.967 | Down |
| Stc2     | 526.371 | 1.45419 | 0.2719  | 5.34834 | 8.88E-08 | 5.04E-06 | 367.205 | 212.082 | 265.099 | 995.242 | 747.997 | 570.601 | Up   |
| Bod1     | 2270.34 | -0.2316 | 0.11164 | -2.0747 | 0.03801  | 0.15939  | 2526.37 | 2429.58 | 2400.51 | 2281.1  | 2098.72 | 1885.77 | Down |
| D630024C | 740.196 | -0.8001 | 0.1833  | -4.365  | 1.27E-05 | 0.00034  | 1013.49 | 788.157 | 1019.46 | 599.592 | 439.937 | 580.542 | Down |
| Nprl3    | 1528.1  | -0.2204 | 0.09847 | -2.2384 | 0.0252   | 0.11942  | 1580.45 | 1672    | 1681.23 | 1433.72 | 1467.14 | 1334.05 | Down |
| Sh3pxd2b | 2290.1  | 0.41349 | 0.14635 | 2.82541 | 0.00472  | 0.03585  | 2306.05 | 1776.56 | 1809.88 | 2444.26 | 2545.87 | 2857.98 | Up   |
| Ubtcd2   | 234.13  | 0.49557 | 0.20746 | 2.38872 | 0.01691  | 0.09129  | 192.905 | 184.462 | 205.646 | 264.106 | 225.635 | 332.022 | Up   |
| Stk10    | 1455.2  | 0.57713 | 0.19073 | 3.02594 | 0.00248  | 0.02227  | 1046.78 | 1470.77 | 986.323 | 1663.15 | 1991.57 | 1572.63 | Up   |
| Fgf18    | 409.39  | 0.57117 | 0.26397 | 2.16376 | 0.03048  | 0.13663  | 275.159 | 453.758 | 259.251 | 500.68  | 572.846 | 394.649 | Up   |
| Dock2    | 1883.1  | 0.66265 | 0.20767 | 3.19091 | 0.00142  | 0.01433  | 1243.6  | 1883.09 | 1247.52 | 2123.05 | 2740.59 | 2060.72 | Up   |
| Ccng1    | 10854.2 | 0.26745 | 0.10882 | 2.45784 | 0.01398  | 0.07919  | 9125.28 | 10451.2 | 9976.28 | 11364.7 | 12244.7 | 11262.9 | Up   |
| Ccnj1    | 110.519 | -1.9146 | 0.65908 | -2.9049 | 0.00367  | 0.02988  | 179.196 | 316.644 | 28.2642 | 56.0843 | 40.1816 | 42.7454 | Down |
| Il12b    | 73.3823 | 0.80019 | 0.31879 | 2.51004 | 0.01207  | 0.0709   | 47.0022 | 46.3622 | 67.2493 | 109.109 | 73.1512 | 97.4197 | Up   |
| Rnf145   | 7530.27 | 0.46344 | 0.11649 | 3.9785  | 6.94E-05 | 0.00137  | 6221.92 | 5676.9  | 7094.31 | 9020.4  | 8776.08 | 8392.01 | Up   |
| 4930597A | 8.12524 | 2.38252 | 1.02522 | 2.32392 | 0.02013  | 0.10268  | 0.97921 | 2.95929 | 3.89851 | 11.2169 | 24.7272 | 4.97039 | Up   |
| Clint1   | 8539.35 | 0.61116 | 0.09475 | 6.45018 | 1.12E-10 | 1.18E-08 | 7323.53 | 6436.45 | 6511.48 | 10187   | 10616.2 | 10161.5 | Up   |
| Gm12165  | 12.1776 | 2.37957 | 0.89785 | 2.65031 | 0.00804  | 0.0527   | 6.85449 | 3.94572 | 0.97463 | 19.3746 | 32.9696 | 8.94671 | Up   |
| Adam19   | 849.045 | 0.86166 | 0.17498 | 4.92443 | 8.46E-07 | 3.46E-05 | 642.364 | 681.623 | 484.39  | 956.67  | 1188.96 | 1131.26 | Up   |
| Cyfp2    | 3278.62 | -0.848  | 0.25961 | -3.2665 | 0.00109  | 0.01178  | 5004.76 | 2723.53 | 4917.97 | 2491.16 | 1761.81 | 2772.49 | Down |
| Havcr2   | 806.015 | 1.14008 | 0.17483 | 6.52114 | 6.98E-11 | 7.98E-09 | 531.713 | 495.188 | 482.441 | 1001.36 | 1364.12 | 961.274 | Up   |
| Sgcd     | 770.951 | 1.76321 | 0.2569  | 6.86343 | 6.72E-12 | 9.08E-10 | 400.498 | 243.648 | 408.369 | 1180.83 | 1487.75 | 904.611 | Up   |
| Gm12184  | 263.363 | -0.3382 | 0.164   | -2.0624 | 0.03917  | 0.1627   | 268.304 | 325.522 | 288.49  | 241.672 | 232.575 | 232.614 | Down |
| Gfpt2    | 647.512 | -0.5681 | 0.21387 | -2.6562 | 0.0079   | 0.05198  | 984.109 | 708.256 | 627.66  | 543.508 | 583.149 | 438.389 | Down |
| Mgat4b   | 6139.56 | 0.32893 | 0.11854 | 2.77482 | 0.00552  | 0.04016  | 5308.31 | 5328.69 | 5690.85 | 6980.97 | 7525.3  | 6003.24 | Up   |
| Ltc4s    | 149.389 | 1.2007  | 0.37185 | 3.22902 | 0.00124  | 0.01308  | 112.609 | 101.602 | 57.503  | 198.844 | 291.574 | 134.201 | Up   |
| Adams2   | 1450.18 | 0.42816 | 0.17706 | 2.41819 | 0.0156   | 0.08598  | 1319.98 | 1202.46 | 1187.1  | 1804.9  | 1913.26 | 1273.41 | Up   |
| Zfp354b  | 241.684 | -0.4966 | 0.20061 | -2.4755 | 0.0133   | 0.07618  | 291.805 | 280.146 | 276.794 | 212.101 | 157.636 | 231.62  | Down |
| D930048H | 715.355 | 0.45209 | 0.1538  | 2.93947 | 0.00329  | 0.02746  | 629.634 | 533.658 | 649.102 | 814.752 | 930.359 | 734.624 | Up   |
| Gm39822  | 362.174 | 0.66373 | 0.1957  | 3.39153 | 0.0007   | 0.00829  | 282.992 | 270.282 | 287.515 | 461.931 | 523.392 | 346.933 | Up   |
| Cdkl3    | 641.114 | -0.7331 | 0.21922 | -3.3442 | 0.00083  | 0.00943  | 761.828 | 628.356 | 1011.66 | 472.128 | 410.059 | 562.648 | Down |
| Fstl4    | 366.728 | -0.8375 | 0.40892 | -2.0481 | 0.04055  | 0.16615  | 676.636 | 277.187 | 457.1   | 298.776 | 129.818 | 360.851 | Down |
| Sowaha   | 125.292 | -0.8545 | 0.2369  | -3.6069 | 0.00031  | 0.00448  | 136.111 | 163.747 | 184.205 | 97.8926 | 79.333  | 90.4611 | Down |
| Septin8  | 6355.14 | 0.20601 | 0.09254 | 2.22615 | 0.026    | 0.1222   | 5568.78 | 6329.92 | 5807.8  | 6650.58 | 6979.24 | 6794.53 | Up   |
| A430108C | 231.368 | -0.9589 | 0.26606 | -3.604  | 0.00031  | 0.00452  | 292.785 | 251.54  | 372.308 | 203.943 | 119.515 | 148.118 | Down |
| Kif3a    | 1501.09 | -0.3238 | 0.15536 | -2.084  | 0.03716  | 0.15698  | 1713.62 | 1525.02 | 1767.97 | 1376.62 | 1101.39 | 1521.93 | Down |
| Il4      | 713.325 | -0.4699 | 0.1709  | -2.7496 | 0.00597  | 0.04253  | 904.793 | 724.039 | 856.697 | 658.736 | 493.513 | 642.175 | Down |
| Csf2     | 81.0602 | 1.16541 | 0.30161 | 3.86401 | 0.00011  | 0.00203  | 52.8775 | 48.3351 | 48.7314 | 140.721 | 109.212 | 86.4848 | Up   |
| Fnip1    | 3246.07 | 0.26241 | 0.08212 | 3.19555 | 0.0014   | 0.0142   | 2871.05 | 2990.85 | 2993.08 | 3438.48 | 3640.04 | 3542.9  | Up   |
| Lymr7    | 234.85  | -0.7208 | 0.27304 | -2.64   | 0.00829  | 0.05392  | 361.33  | 259.431 | 256.327 | 132.563 | 164.848 | 234.603 | Down |
| Tnlp1    | 2714.62 | 0.43076 | 0.13148 | 3.27637 | 0.00105  | 0.01145  | 2137.62 | 2544    | 2255.29 | 3315.09 | 3299.02 | 2736.7  | Up   |
| Gm2a     | 6900.37 | 0.41857 | 0.07749 | 5.40168 | 6.60E-08 | 3.93E-06 | 5834.15 | 6051.75 | 5833.14 | 8161.8  | 7715.91 | 7805.5  | Up   |
| Atp5pb-p | 330.223 | 0.29728 | 0.14601 | 2.0361  | 0.04174  | 0.16953  | 304.535 | 290.01  | 294.337 | 386.472 | 372.968 | 333.016 | Up   |
| Fat2     | 254.344 | -0.6148 | 0.29253 | -2.1017 | 0.03558  | 0.15239  | 330.974 | 308.752 | 283.617 | 186.608 | 129.818 | 286.295 | Down |
| Gria1    | 441.933 | -0.7391 | 0.16264 | -4.5446 | 5.50E-06 | 0.00017  | 524.858 | 543.523 | 589.65  | 307.954 | 387.392 | 298.224 | Down |
| Galnt10  | 761.138 | 0.47586 | 0.17555 | 2.71066 | 0.00671  | 0.04613  | 676.636 | 704.311 | 529.223 | 981.985 | 923.147 | 751.523 | Up   |
| Gm12248  | 28.0914 | 2.3007  | 0.77515 | 2.96808 | 0.003    | 0.02568  | 9.79213 | 9.8643  | 8.77165 | 71.38   | 60.7876 | 7.95263 | Up   |
| Gm12247  | 18.8805 | 1.57749 | 0.75335 | 2.09396 | 0.03626  | 0.15453  | 11.7506 | 7.89144 | 8.77165 | 37.7295 | 40.1816 | 6.95855 | Up   |
| Mrip22   | 843.265 | -0.2719 | 0.10556 | -2.5757 | 0.01     | 0.06193  | 961.587 | 882.855 | 922.972 | 777.023 | 768.603 | 746.553 | Down |
| Lypd8    | 117.629 | 1.82214 | 0.41896 | 4.34918 | 1.37E-05 | 0.00036  | 50.9191 | 31.5657 | 73.097  | 230.456 | 103.03  | 216.709 | Up   |
| 2210407C | 603.06  | 5.32564 | 0.88374 | 6.02626 | 1.68E-09 | 1.44E-07 | 42.1061 | 8.87787 | 37.0358 | 1215.5  | 1968.9  | 345.939 | Up   |
| Olfr323  | 10.0619 | 4.8968  | 1.48106 | 3.30628 | 0.00095  | 0.01052  | 1.95843 | 0       | 0       | 16.3154 | 38.121  | 3.97631 | Up   |
| Olfr317  | 6.23556 | -2.6749 | 1.04609 | -2.5571 | 0.01056  | NA       | 5.87528 | 13.81   | 12.6702 | 2.03943 | 1.0303  | 1.98816 | Down |
| Fam183b  | 2343.88 | -0.7765 | 0.2698  | -2.878  | 0.004    | 0.03169  | 3532.02 | 1848.57 | 3498.91 | 2156.7  | 1359.99 | 1667.07 | Down |
| Gm12258  | 298.737 | -0.3415 | 0.16945 | -2.0154 | 0.04386  | 0.17506  | 346.641 | 340.318 | 314.805 | 229.436 | 298.787 | 262.437 | Down |
| 2810021J | 350.477 | 0.4362  | 0.15407 | 2.83115 | 0.00464  | 0.03543  | 279.076 | 286.065 | 328.449 | 418.083 | 421.392 | 369.797 | Up   |
| Obscn    | 258.913 | -1.5063 | 0.5085  | -2.9622 | 0.00305  | 0.02609  | 505.274 | 126.263 | 517.527 | 94.8335 | 96.8481 | 212.733 | Down |
| Snap47   | 2405.16 | -0.2491 | 0.09496 | -2.6229 | 0.00872  | 0.05599  | 2565.54 | 2716.63 | 2554.5  | 2239.29 | 2288.29 | 2066.69 | Down |
| Gm12263  | 39.5551 | 0.83485 | 0.37786 | 2.20942 | 0.02715  | 0.12572  | 20.5635 | 31.5657 | 33.1373 | 54.0449 | 45.3331 | 52.6862 | Up   |
| Nlrp3    | 352.283 | 0.89023 | 0.25583 | 3.47976 | 0.0005   | 0.00645  | 229.136 | 318.617 | 192.976 | 433.379 | 570.785 | 368.803 | Up   |
| Flcn     | 4314.93 | 0.21892 | 0.08064 | 2.71499 | 0.00663  | 0.04576  | 4116.61 | 4009.84 | 3838.08 | 4727.4  | 4594.1  | 4603.58 | Up   |
| Nt5m     | 941.524 | -0.2488 | 0.10707 | -2.324  | 0.02012  | 0.10268  | 1015.44 | 1021.94 | 1030.18 | 917.743 | 812.905 | 850.931 | Down |
| Pemt     | 256.271 | -0.6353 | 0.20531 | -3.0944 | 0.00197  | 0.0186   | 279.076 | 280.146 | 376.206 | 176.411 | 207.09  | 218.697 | Down |
| Drc3     | 4453.66 | -1.0804 | 0.29371 | -3.6783 | 0.00023  | 0.00364  | 6838.82 | 4068.04 | 7235.63 | 3136.64 | 1760.78 | 3682.07 | Down |
| Smcr8    | 2055.12 | 0.23999 | 0.09687 | 2.47742 | 0.01323  | 0.07593  | 1938.84 | 1935.37 | 1779.67 | 2175.05 | 2166.72 | 2335.09 | Up   |
| Shmt1    | 1229.37 | 0.25463 | 0.11443 | 2.22528 | 0.02606  | 0.12241  | 1094.76 | 1042.66 | 1226.08 | 1294.02 | 1327.02 | 1391.71 | Up   |
| Dhrs7b   | 1756.6  | 0.35836 | 0.13461 | 2.66226 | 0.00776  | 0.05124  | 1437.48 | 1701.59 | 1479.48 | 1992.52 | 1724.96 | 1753.55 | Up   |
| Aldh3a1  | 1896.6  | -1.5623 | 0.6636  | -2.3542 | 0.01856  | 0.09733  | 3557.48 | 1649.31 | 3294.24 | 1017.68 | 337.938 | 1522.93 | Down |
| Slc47a2  | 93.869  | -1.7395 | 0.60505 | -2.8749 | 0.00404  | 0.03191  | 227.177 | 55      |         |         |         |         |      |

|          |         |         |         |         |          |          |         |         |         |         |         |         |      |
|----------|---------|---------|---------|---------|----------|----------|---------|---------|---------|---------|---------|---------|------|
| Trpv2    | 1401.35 | 0.89474 | 0.17515 | 5.10833 | 3.25E-07 | 1.55E-05 | 992.922 | 1087.05 | 860.596 | 1784.5  | 2175.99 | 1507.02 | Up   |
| Mmgt2    | 1204.34 | 0.24711 | 0.11925 | 2.07231 | 0.03824  | 0.16001  | 1102.59 | 1140.31 | 1061.37 | 1435.76 | 1296.12 | 1189.91 | Up   |
| Zfp287   | 532.279 | 0.35677 | 0.17285 | 2.06403 | 0.03901  | 0.16237  | 409.311 | 559.306 | 431.76  | 612.849 | 635.694 | 544.755 | Up   |
| Tekt3    | 97.2017 | -2.0683 | 0.39735 | -5.2051 | 1.94E-07 | 9.94E-06 | 222.281 | 95.6837 | 153.016 | 34.6703 | 28.8484 | 48.7098 | Down |
| 2810001G | 310.232 | -0.5739 | 0.14654 | -3.9161 | 9.00E-05 | 0.0017   | 384.831 | 363.993 | 364.511 | 266.146 | 248.302 | 233.608 | Down |
| Gm12292  | 1.96018 | -4.3928 | 2.01383 | -2.1813 | 0.02916  | NA       | 3.91685 | 3.94572 | 3.89851 | 0       | 0       | 0       | Down |
| Gm12295  | 23.2556 | -2.3245 | 0.719   | -3.2329 | 0.00123  | 0.01294  | 40.1477 | 14.7964 | 61.4015 | 7.138   | 4.12119 | 11.9289 | Down |
| Map2k4   | 3752.52 | 0.2042  | 0.07987 | 2.55674 | 0.01057  | 0.06452  | 3498.73 | 3479.14 | 3484.29 | 3877.98 | 4146.95 | 4028.01 | Up   |
| Dnah9    | 3344.71 | -1.024  | 0.30802 | -3.3244 | 0.00089  | 0.00997  | 5421.9  | 2773.84 | 5257.14 | 2161.8  | 1445.51 | 3008.08 | Down |
| Shisa6   | 27.7442 | -1.0265 | 0.44153 | -2.3248 | 0.02008  | 0.10252  | 42.1061 | 27.62   | 41.909  | 18.3549 | 19.5757 | 16.8993 | Down |
| Tmem220  | 836.662 | -0.3661 | 0.14152 | -2.5866 | 0.00969  | 0.06036  | 997.818 | 869.044 | 960.008 | 715.84  | 652.179 | 825.085 | Down |
| Adprm    | 1749.79 | -0.2424 | 0.11157 | -2.1726 | 0.02981  | 0.13447  | 1873.23 | 1738.09 | 2077.91 | 1644.8  | 1599.02 | 1565.67 | Down |
| Sco1     | 825.471 | 0.34104 | 0.14992 | 2.27475 | 0.02292  | 0.11169  | 828.414 | 734.89  | 621.812 | 858.6   | 946.844 | 962.268 | Up   |
| Myh13    | 74.9507 | 0.9705  | 0.28861 | 3.36269 | 0.00077  | 0.00895  | 46.023  | 53.2672 | 52.6299 | 90.7546 | 120.545 | 86.4848 | Up   |
| Dhrs7c   | 51.3136 | -2.7027 | 1.05455 | -2.5629 | 0.01038  | 0.06364  | 158.632 | 9.8643  | 98.4374 | 6.11829 | 1.0303  | 33.7987 | Down |
| Cfap52   | 404.024 | -0.8087 | 0.39239 | -2.0611 | 0.03929  | 0.16307  | 713.846 | 326.508 | 502.908 | 313.052 | 147.333 | 420.495 | Down |
| Pik3r5   | 1583.69 | 1.07976 | 0.1815  | 5.94923 | 2.69E-09 | 2.20E-07 | 1013.49 | 1253.75 | 784.575 | 2078.18 | 2239.87 | 2132.3  | Up   |
| Pik3r6   | 817.117 | 0.51888 | 0.17505 | 2.96412 | 0.00304  | 0.02596  | 565.985 | 812.818 | 636.432 | 881.034 | 1057.09 | 949.345 | Up   |
| Mfsd6l   | 478.701 | -0.647  | 0.26329 | -2.4574 | 0.01399  | 0.07922  | 679.574 | 430.083 | 643.254 | 426.241 | 259.635 | 433.418 | Down |
| Ccdc42   | 165.402 | 0.69365 | 0.2264  | 3.06381 | 0.00219  | 0.0202   | 125.339 | 127.249 | 126.702 | 181.509 | 178.242 | 253.49  | Up   |
| Tmem107  | 1750.24 | -0.8318 | 0.22953 | -3.6239 | 0.00029  | 0.00426  | 2618.41 | 1659.17 | 2446.31 | 1376.62 | 939.632 | 1461.3  | Down |
| Rnf227   | 242.239 | -0.6004 | 0.19784 | -3.0349 | 0.00241  | 0.02174  | 276.138 | 260.417 | 339.17  | 218.219 | 187.514 | 171.976 | Down |
| Chd3     | 8482.79 | 0.41214 | 0.0988  | 4.17137 | 3.03E-05 | 0.00069  | 7641.78 | 7560    | 6636.24 | 9407.89 | 9639.47 | 10011.4 | Up   |
| Dnah2    | 2167.95 | -0.8583 | 0.27198 | -3.1558 | 0.0016   | 0.01578  | 3057.1  | 1792.34 | 3534    | 1710.06 | 1118.9  | 1795.31 | Down |
| Efnb3    | 150.069 | -0.984  | 0.36039 | -2.7302 | 0.00633  | 0.04437  | 234.032 | 126.263 | 237.809 | 114.208 | 62.8482 | 125.254 | Down |
| Cd68     | 5939.4  | 1.92514 | 0.21239 | 9.06429 | 1.25E-19 | 6.69E-17 | 2489.16 | 2944.49 | 1994.09 | 8685.93 | 11989.6 | 7533.13 | Up   |
| Slc35g3  | 170.736 | -1.903  | 0.40312 | -4.7207 | 2.35E-06 | 8.34E-05 | 340.766 | 145.005 | 322.602 | 58.1237 | 52.5452 | 105.372 | Down |
| Tmem102  | 990.991 | 0.32908 | 0.12336 | 2.66767 | 0.00764  | 0.05065  | 836.248 | 880.882 | 918.099 | 1161.46 | 1161.15 | 988.114 | Up   |
| Nlgn2    | 2014.15 | 0.2742  | 0.13899 | 1.97279 | 0.04852  | 0.18718  | 1689.14 | 1964.97 | 1815.73 | 2144.46 | 2523.2  | 1947.4  | Up   |
| Slc2a4   | 161.621 | -1.4077 | 0.50495 | -2.7877 | 0.00531  | 0.03904  | 368.184 | 69.0501 | 267.048 | 90.7546 | 77.2724 | 97.4197 | Down |
| Asgr1    | 85.172  | -1.6771 | 0.60072 | -2.7918 | 0.00524  | 0.0387   | 182.134 | 51.2943 | 155.94  | 27.5323 | 19.5757 | 74.5559 | Down |
| Mgl2     | 1193.64 | 0.60112 | 0.15205 | 3.95355 | 7.70E-05 | 0.0015   | 914.585 | 1086.06 | 845.002 | 1327.67 | 1366.18 | 1622.34 | Up   |
| Clec10a  | 188.156 | -0.5629 | 0.22872 | -2.4611 | 0.01385  | 0.07865  | 252.637 | 213.069 | 207.596 | 167.233 | 116.424 | 171.976 | Down |
| Slc16a11 | 4259.25 | -0.6566 | 0.27618 | -2.3774 | 0.01744  | 0.09339  | 5197.66 | 3367.67 | 7070.92 | 4079.88 | 2464.47 | 3374.9  | Down |
| Alox12   | 402.495 | -0.8877 | 0.23275 | -3.8138 | 0.00014  | 0.00239  | 424.978 | 438.961 | 703.681 | 274.303 | 295.696 | 277.348 | Down |
| Alox15   | 348.19  | -2.5223 | 1.11493 | -2.2623 | 0.02368  | 0.11425  | 1372.86 | 94.6972 | 311.881 | 75.4589 | 46.3634 | 187.881 | Down |
| Gm12312  | 11.8296 | 1.70677 | 0.82631 | 2.06553 | 0.03887  | 0.16206  | 3.91685 | 5.91858 | 6.82239 | 8.15772 | 12.3636 | 33.7987 | Up   |
| Arrb2    | 2161.18 | 0.40496 | 0.12211 | 3.31627 | 0.00091  | 0.0102   | 1796.86 | 2042.9  | 1739.71 | 2381.03 | 2697.32 | 2309.24 | Up   |
| Cxcl16   | 5633.36 | 0.47916 | 0.11388 | 4.20743 | 2.58E-05 | 0.00061  | 4518.09 | 5295.15 | 4305.9  | 6532.29 | 6731.97 | 6416.78 | Up   |
| Zmynd15  | 788.724 | 0.69274 | 0.24659 | 2.80927 | 0.00497  | 0.03716  | 631.592 | 727.985 | 449.303 | 914.684 | 756.239 | 1252.54 | Up   |
| Pld2     | 2793.76 | 0.46362 | 0.08732 | 5.3097  | 1.10E-07 | 6.04E-06 | 2360.88 | 2367.43 | 2317.66 | 3380.35 | 3251.62 | 3084.63 | Up   |
| Mink1    | 3362.8  | 0.30083 | 0.08836 | 3.40454 | 0.00066  | 0.00801  | 3150.13 | 2981.98 | 2908.29 | 3563.9  | 3806.95 | 3765.57 | Up   |
| Pfn1     | 21234.7 | 0.30266 | 0.12889 | 2.34827 | 0.01886  | 0.09825  | 18390.6 | 19706.9 | 18948.7 | 24508.8 | 26000.6 | 19852.7 | Up   |
| Eno3     | 1058.98 | -0.5179 | 0.14715 | -3.5195 | 0.00043  | 0.00574  | 1346.42 | 1052.52 | 1342.06 | 928.96  | 874.723 | 809.18  | Down |
| Kif1c    | 10707.7 | 0.361   | 0.08959 | 4.02937 | 5.59E-05 | 0.00115  | 9070.45 | 9815.96 | 9238.49 | 12108.1 | 12626.3 | 11387.2 | Up   |
| Scimp    | 429.281 | 1.09944 | 0.15726 | 6.99101 | 2.73E-12 | 3.94E-10 | 275.159 | 291.983 | 252.428 | 527.193 | 657.33  | 571.595 | Up   |
| 6330403K | 219.541 | -1.9285 | 0.31584 | -6.106  | 1.02E-09 | 9.07E-08 | 296.701 | 235.757 | 510.705 | 87.6955 | 98.9087 | 87.4789 | Down |
| Nlrp1b   | 385.796 | 0.96702 | 0.2447  | 3.95194 | 7.75E-05 | 0.00151  | 226.198 | 309.739 | 247.555 | 398.709 | 461.574 | 671.003 | Up   |
| Aip1l    | 21.221  | -1.4382 | 0.59342 | -2.4237 | 0.01536  | 0.08495  | 41.1269 | 22.6879 | 29.2388 | 10.1971 | 6.18179 | 17.8934 | Down |
| Pitpnm3  | 2864.07 | -0.5026 | 0.12944 | -3.883  | 0.0001   | 0.00192  | 3533    | 3128.95 | 3412.17 | 2381.03 | 2076.05 | 2653.2  | Down |
| Med31    | 1335.77 | -0.5677 | 0.15502 | -3.662  | 0.00025  | 0.0038   | 1696.98 | 1400.73 | 1688.05 | 1213.46 | 915.935 | 1099.45 | Down |
| Tekt1    | 3318.56 | -0.8302 | 0.23818 | -3.4855 | 0.00049  | 0.00636  | 4681.62 | 3163.48 | 4898.48 | 2960.23 | 1713.39 | 2494.14 | Down |
| Ggt6     | 524.204 | -0.6025 | 0.30594 | -1.9695 | 0.0489   | 0.18827  | 708.95  | 437.975 | 749.488 | 433.379 | 262.726 | 552.708 | Down |
| Spns2    | 3868.72 | 0.40883 | 0.19926 | 2.05181 | 0.04019  | 0.16536  | 2853.43 | 4192.33 | 2926.81 | 3923.86 | 5326.64 | 3989.24 | Up   |
| Spns3    | 88.9694 | 0.99654 | 0.33305 | 2.99212 | 0.00277  | 0.02415  | 50.9191 | 50.3079 | 76.9956 | 145.819 | 85.5148 | 124.26  | Up   |
| Zzef1    | 3141.7  | 0.20324 | 0.10027 | 2.02684 | 0.04268  | 0.17194  | 2842.65 | 3069.77 | 2849.81 | 3203.94 | 3619.44 | 3264.55 | Up   |
| Atp2a3   | 13410.2 | 0.22391 | 0.09737 | 2.29954 | 0.02147  | 0.10712  | 12573.1 | 11448.5 | 13093.1 | 14085.3 | 15225.8 | 14035.4 | Up   |
| Itgae    | 617.745 | 0.58236 | 0.15587 | 3.73609 | 0.00019  | 0.00303  | 560.11  | 416.273 | 507.781 | 780.082 | 701.633 | 740.589 | Up   |
| P2rx5    | 722.856 | 0.44917 | 0.2127  | 2.11175 | 0.03471  | 0.14958  | 597.32  | 779.279 | 457.1   | 830.048 | 914.905 | 758.482 | Up   |
| Tax1bp3  | 4337.07 | 0.25257 | 0.08365 | 3.01922 | 0.00253  | 0.02265  | 4051    | 3971.37 | 3852.7  | 4793.68 | 4846.52 | 4507.15 | Up   |
| Ctns     | 1552.34 | 0.28819 | 0.10832 | 2.66043 | 0.0078   | 0.05144  | 1394.4  | 1470.77 | 1328.42 | 1613.19 | 1673.2  | 1834.07 | Up   |
| Trpv3    | 24.8731 | -1.2341 | 0.61156 | -2.018  | 0.04359  | 0.17438  | 21.5427 | 29.5929 | 53.6045 | 7.138   | 16.4848 | 20.8756 | Down |
| Mnt      | 1836.03 | 0.28726 | 0.11672 | 2.46114 | 0.01385  | 0.07865  | 1556.95 | 1635.5  | 1768.95 | 1917.06 | 2215.14 | 1922.55 | Up   |
| Serpinf1 | 3080.28 | 0.53394 | 0.21543 | 2.47852 | 0.01319  | 0.07577  | 2453.91 | 1936.36 | 3159.74 | 4482.67 | 3262.96 | 3186.02 | Up   |
| Wdr81    | 2890.62 | 0.35277 | 0.12904 | 2.73382 | 0.00626  | 0.0441   | 2445.09 | 2304.3  | 2867.35 | 3393.61 | 3368.05 | 2965.34 | Up   |
| Tlcd2    | 292.309 | 0.69793 | 0.26579 | 2.62585 | 0.00864  | 0.05561  | 208.572 | 261.404 | 198.824 | 431.339 | 413.15  | 240.567 | Up   |
| Myo1c    | 19704.4 | 0.28944 | 0.10843 | 2.6693  | 0.0076   | 0.05043  | 16552.6 | 18938.5 | 17711.9 | 21595.5 | 23454.7 | 19973   | Up   |
| Doc2b    | 125.959 | -1.8643 | 0.4038  | -4.617  | 3.89E-06 | 0.00013  | 154.716 | 135.141 | 303.109 | 60.1632 | 35.0301 | 67.5973 | Down |
| Gm12339  | 14.5212 | -1.3678 | 0.66765 | -2.0487 | 0.04049  | 0.16608  | 13.709  | 30.5793 | 18.5179 | 11.2169 | 5.15149 | 7.95263 | Down |
| Rph3al   | 1742.27 | -0.3123 | 0.12819 | -2.4362 | 0.01484  | 0.08282  | 2035.78 | 1738.09 | 2016.5  | 1652.96 | 1390.9  | 1619.35 | Down |
| 1700016K | 2523.63 | -0.9432 | 0.27659 | -3.4101 | 0.00065  | 0.00789  | 4038.27 | 2129.7  | 3793.25 | 1971.11 | 1203.39 | 2006.05 | Down |
| Vps53    | 2683.11 | 0.21901 | 0.08962 | 2.44382 | 0.01453  | 0.08163  | 2496.01 | 2535.12 | 2408.3  | 3008.16 | 2904.41 | 2746.64 | Up   |
| Nxn      | 1473.3  | -0.5534 | 0.11527 | -4.8012 | 1.58E-06 | 5.88E-05 | 1800.77 | 1589.14 | 1867.39 | 1252.21 | 1193.09 | 1137.23 | Down |
| Abr      | 6578.73 | 0.40059 | 0.09768 | 4.10115 | 4.11E-05 | 0.00089  | 5771.48 | 5589.11 | 5652.84 | 7364.38 | 8129.05 | 6965.51 | Up   |
| Ankrd13b | 607.52  | -0.3721 | 0.15572 | -2.3896 | 0.01686  | 0.09111  | 706.012 | 597.776 | 752.412 | 585.316 | 525.452 | 478.152 | Down |
| Trp53i13 | 929.173 | -0.2676 | 0.1361  | -1.966  | 0.0493   | 0.18918  | 993.901 | 1025.89 | 1025.31 | 887.152 | 921.087 | 721.701 | Down |
| Myo18a   | 6591.25 | 0.27554 | 0.09781 | 2.81719 | 0.00484  | 0.03644  | 5544.3  | 5976.78 | 63      |         |         |         |      |

|           |         |         |         |         |          |          |         |         |         |         |         |         |      |
|-----------|---------|---------|---------|---------|----------|----------|---------|---------|---------|---------|---------|---------|------|
| Vtn       | 592.723 | -0.3778 | 0.14444 | -2.6153 | 0.00891  | 0.0569   | 649.218 | 625.396 | 734.869 | 518.015 | 564.604 | 464.235 | Down |
| Ift20     | 3395.23 | -0.2769 | 0.12534 | -2.2088 | 0.02719  | 0.12588  | 3832.64 | 4010.82 | 3316.66 | 3342.63 | 2816.84 | 3051.82 | Down |
| Nos2      | 297.071 | 0.62326 | 0.30654 | 2.0332  | 0.04203  | 0.17024  | 248.72  | 300.861 | 152.042 | 349.762 | 463.634 | 267.407 | Up   |
| Rab11fip4 | 869.219 | -1.1694 | 0.28613 | -4.0868 | 4.37E-05 | 0.00094  | 1334.67 | 800.981 | 1474.61 | 586.336 | 361.635 | 657.086 | Down |
| Adap2     | 334.736 | 0.39681 | 0.17926 | 2.21362 | 0.02685  | 0.12502  | 284.951 | 264.363 | 317.728 | 383.413 | 324.544 | 433.418 | Up   |
| Spaca3    | 14.1238 | -1.6771 | 0.77374 | -2.1675 | 0.03019  | 0.13571  | 27.418  | 10.8507 | 26.3149 | 8.15772 | 2.0606  | 9.94079 | Down |
| Ccl12     | 231.577 | 0.6244  | 0.23261 | 2.68436 | 0.00727  | 0.04884  | 140.027 | 179.53  | 227.088 | 312.033 | 281.271 | 249.514 | Up   |
| Fndc8     | 13.6413 | -2.2508 | 0.70117 | -3.2101 | 0.00133  | 0.01369  | 13.709  | 26.6336 | 27.2896 | 6.11829 | 4.12119 | 3.97631 | Down |
| Slfm9     | 394.459 | 0.81747 | 0.36223 | 2.25676 | 0.02402  | 0.11556  | 138.069 | 280.146 | 438.582 | 549.626 | 425.513 | 534.814 | Up   |
| Slfm2     | 171.964 | 0.70626 | 0.1859  | 3.79903 | 0.00015  | 0.00251  | 130.235 | 140.073 | 121.828 | 213.12  | 199.878 | 226.65  | Up   |
| Gm11427   | 143.885 | 0.77511 | 0.25813 | 3.0028  | 0.00268  | 0.02356  | 98.9005 | 97.6565 | 121.828 | 137.662 | 217.393 | 189.869 | Up   |
| Gas2l2    | 794.2   | -0.9616 | 0.2759  | -3.4855 | 0.00049  | 0.00636  | 1225    | 708.256 | 1215.36 | 591.435 | 375.029 | 650.127 | Down |
| 1700020L  | 195.169 | -0.4226 | 0.19957 | -2.1176 | 0.03421  | 0.14823  | 194.863 | 258.445 | 217.342 | 181.509 | 162.787 | 156.07  | Down |
| Ccl5      | 457.462 | -0.7495 | 0.25441 | -2.9459 | 0.00322  | 0.027    | 438.687 | 796.049 | 486.339 | 297.757 | 375.029 | 350.91  | Down |
| Ccl9      | 1516.93 | 0.75485 | 0.13432 | 5.61962 | 1.91E-08 | 1.30E-06 | 1193.66 | 1234.02 | 959.033 | 1907.89 | 1969.93 | 1837.06 | Up   |
| E230016K  | 1114.81 | 2.65646 | 0.2419  | 10.9818 | 4.67E-28 | 8.04E-25 | 408.332 | 290.01  | 217.342 | 1625.43 | 2274.9  | 1872.84 | Up   |
| Wfdc17    | 930.151 | 1.65552 | 0.18619 | 8.89139 | 6.03E-19 | 2.85E-16 | 439.667 | 460.663 | 444.43  | 1155.34 | 1305.39 | 1775.42 | Up   |
| Wfdc21    | 435.536 | 1.52834 | 0.24283 | 6.29381 | 3.10E-10 | 2.99E-08 | 272.221 | 237.73  | 162.763 | 590.415 | 795.39  | 554.696 | Up   |
| Heatr6    | 1460.93 | 0.20498 | 0.09024 | 2.27144 | 0.02312  | 0.11243  | 1349.36 | 1336.61 | 1385.92 | 1530.59 | 1609.33 | 1553.74 | Up   |
| Dusp14    | 3341.59 | -0.6222 | 0.16626 | -3.7423 | 0.00018  | 0.00298  | 4231.18 | 3227.6  | 4694.78 | 2909.25 | 2529.38 | 2457.36 | Down |
| Dhrs11    | 781.168 | -0.2326 | 0.11484 | -2.0254 | 0.04282  | 0.17231  | 869.541 | 789.144 | 873.266 | 754.589 | 701.633 | 698.837 | Down |
| Car4      | 19506.4 | 0.83266 | 0.17409 | 4.78287 | 1.73E-06 | 6.34E-05 | 13611.1 | 15931.8 | 12542.5 | 23807.3 | 30517.4 | 20628.1 | Up   |
| Usp32     | 3338.61 | 0.29074 | 0.1032  | 2.81731 | 0.00484  | 0.03644  | 2805.44 | 3195.05 | 3009.65 | 3455.81 | 3698.77 | 3866.97 | Up   |
| Trim37    | 2485.44 | -0.4397 | 0.14872 | -2.9563 | 0.00311  | 0.02641  | 3008.14 | 2433.52 | 3142.2  | 2040.45 | 1918.42 | 2369.88 | Down |
| Ppm1e     | 417.515 | -0.3281 | 0.14854 | -2.2086 | 0.0272   | 0.12588  | 428.895 | 454.744 | 510.705 | 339.565 | 389.453 | 381.726 | Down |
| Tspoap1   | 974.962 | -1.247  | 0.29692 | -4.1998 | 2.67E-05 | 0.00062  | 1431.61 | 905.542 | 1778.69 | 546.567 | 407.998 | 779.358 | Down |
| Mks1      | 1008.59 | -0.5863 | 0.25929 | -2.2611 | 0.02375  | 0.11458  | 1287.66 | 875.949 | 1468.76 | 773.964 | 594.482 | 1050.74 | Down |
| Cuedc1    | 2148.26 | -0.2953 | 0.14487 | -2.0381 | 0.04154  | 0.16897  | 2314.86 | 2008.37 | 2778.66 | 1966.01 | 1906.05 | 1915.59 | Down |
| Mrps23    | 1948.51 | -0.2465 | 0.08702 | -2.8327 | 0.00462  | 0.03529  | 2073.97 | 2116.88 | 2152.95 | 1764.11 | 1739.14 | 1844.02 | Down |
| Msi2      | 5773.27 | -0.3794 | 0.16067 | -2.3615 | 0.0182   | 0.09612  | 7200.15 | 5683.81 | 6700.56 | 4736.58 | 4354.04 | 5964.47 | Down |
| Akap1     | 2309.08 | 0.27193 | 0.12033 | 2.25994 | 0.02383  | 0.11482  | 2046.55 | 2261.88 | 1967.77 | 2690.11 | 2267.49 | Up      |      |
| Scpep1    | 727.178 | 0.47209 | 0.1494  | 3.16002 | 0.00158  | 0.01562  | 682.511 | 565.224 | 579.903 | 866.758 | 922.117 | 746.553 | Up   |
| Ankfn1    | 308.812 | -1.3908 | 0.31115 | -4.47   | 7.82E-06 | 0.00023  | 619.842 | 359.06  | 362.561 | 167.233 | 119.515 | 224.662 | Down |
| Stxbp4    | 1022.97 | -0.359  | 0.16836 | -2.1325 | 0.03296  | 0.14438  | 1272.98 | 941.054 | 1234.85 | 909.586 | 790.239 | 989.108 | Down |
| B230206L  | 185.392 | -1.1153 | 0.23173 | -4.8131 | 1.49E-06 | 5.63E-05 | 256.554 | 223.92  | 280.693 | 121.346 | 90.6663 | 139.171 | Down |
| Mycbpap   | 2525.91 | -0.7157 | 0.28646 | -2.4983 | 0.01248  | 0.07258  | 3404.72 | 2084.33 | 3930.67 | 1963.97 | 1279.63 | 2492.15 | Down |
| Lrrc59    | 7244.97 | 0.34233 | 0.08825 | 3.87895 | 0.0001   | 0.00194  | 6816.3  | 6147.43 | 6204.48 | 8236.24 | 8173.36 | 7891.99 | Up   |
| Sgca      | 29.5065 | -1.8614 | 0.83309 | -2.2343 | 0.02546  | 0.12034  | 71.4825 | 11.8372 | 55.5538 | 11.2169 | 3.0909  | 23.8579 | Down |
| Ppp1r9b   | 6057.05 | 0.27839 | 0.13101 | 2.12498 | 0.03359  | 0.14635  | 5366.09 | 5946.2  | 5110.95 | 6442.56 | 7543.85 | 5932.66 | Up   |
| Nxph3     | 378.645 | -1.2816 | 0.19713 | -6.501  | 7.98E-11 | 8.82E-09 | 548.359 | 500.12  | 561.385 | 237.594 | 167.939 | 256.472 | Down |
| B4galnt2  | 30.0728 | 1.01109 | 0.4513  | 2.2404  | 0.02507  | 0.11897  | 14.6882 | 28.6065 | 16.5687 | 38.7492 | 37.0907 | 44.7335 | Up   |
| Calco2    | 90.61   | -1.4317 | 0.48039 | -2.9802 | 0.00288  | 0.0249   | 173.321 | 99.6294 | 123.778 | 39.7689 | 22.6666 | 84.4967 | Down |
| Ttll6     | 1598.89 | -0.727  | 0.29532 | -2.4619 | 0.01382  | 0.07854  | 1970.18 | 1358.31 | 2651.96 | 1347.04 | 773.754 | 1492.11 | Down |
| Skap1     | 359.072 | -0.5259 | 0.22515 | -2.3356 | 0.01951  | 0.10044  | 369.163 | 553.387 | 348.917 | 266.146 | 296.726 | 320.093 | Down |
| D030028A  | 29.5856 | 0.9421  | 0.40892 | 2.3039  | 0.02123  | 0.10646  | 19.5843 | 19.7286 | 21.4418 | 33.6506 | 45.3331 | 37.775  | Up   |
| Scrn2     | 702.494 | -0.3101 | 0.13911 | -2.229  | 0.02581  | 0.1215   | 814.705 | 725.026 | 793.347 | 706.662 | 571.816 | 603.406 | Down |
| Lrrc46    | 924.345 | -1.1916 | 0.27578 | -4.3209 | 1.55E-05 | 0.0004   | 1457.07 | 875.949 | 1524.32 | 709.722 | 391.513 | 587.5   | Down |
| Osbpl7    | 1861.7  | 0.42255 | 0.12545 | 3.36824 | 0.00076  | 0.00883  | 1429.65 | 1649.31 | 1693.9  | 2244.39 | 2224.41 | 1928.51 | Up   |
| Gm11592   | 61.1864 | -0.9469 | 0.44302 | -2.1374 | 0.03257  | 0.14315  | 94.0044 | 49.3215 | 98.4374 | 49.966  | 23.6969 | 51.6921 | Down |
| Srcin1    | 1515.78 | -0.3011 | 0.14984 | -2.0093 | 0.04451  | 0.17654  | 1747.89 | 1422.43 | 1849.84 | 1375.6  | 1215.75 | 1483.17 | Down |
| Gm11613   | 503.525 | -0.5514 | 0.19659 | -2.8049 | 0.00503  | 0.03756  | 560.11  | 571.143 | 664.696 | 373.216 | 341.029 | 510.956 | Down |
| Cisd3     | 729.752 | -0.3286 | 0.12091 | -2.7181 | 0.00657  | 0.04557  | 874.437 | 803.94  | 759.235 | 660.775 | 615.088 | 665.039 | Down |
| 1700001P  | 17.3022 | -1.2777 | 0.61649 | -2.0725 | 0.03821  | 0.15999  | 28.3972 | 25.6472 | 19.4925 | 5.09857 | 9.27269 | 15.9053 | Down |
| B230217C  | 86.2392 | -0.5641 | 0.2749  | -2.052  | 0.04017  | 0.16534  | 89.1084 | 106.534 | 113.057 | 79.5378 | 55.6361 | 73.5618 | Down |
| Stac2     | 128.463 | 1.04157 | 0.30785 | 3.38335 | 0.00072  | 0.00843  | 114.568 | 83.8465 | 53.6045 | 182.529 | 176.181 | 160.047 | Up   |
| Fbxl20    | 2779.91 | 0.28561 | 0.1217  | 2.34676 | 0.01894  | 0.09854  | 2260.02 | 2742.27 | 2514.54 | 3235.56 | 3120.77 | 2806.28 | Up   |
| Ppp1r1b   | 94.1947 | -1.0533 | 0.32101 | -3.2813 | 0.00103  | 0.01127  | 168.425 | 121.331 | 91.615  | 70.3603 | 59.7573 | 53.6802 | Down |
| Pgap3     | 919.15  | -0.3652 | 0.13989 | -2.6106 | 0.00904  | 0.05744  | 1009.57 | 947.959 | 1147.14 | 730.116 | 795.39  | 884.73  | Down |
| Igfbp4    | 7353    | -0.3646 | 0.08191 | -4.4513 | 8.54E-06 | 0.00025  | 8331.14 | 8156.79 | 8343.78 | 6135.62 | 6418.76 | 6731.9  | Down |
| Tns4      | 109.422 | 0.78735 | 0.3086  | 2.55137 | 0.01073  | 0.06512  | 80.2954 | 62.1451 | 98.4374 | 116.247 | 118.484 | 180.922 | Up   |
| A830036E  | 28.0619 | 3.08908 | 1.11848 | 2.76186 | 0.00575  | 0.04144  | 5.87528 | 11.8372 | 0       | 59.1435 | 86.5451 | 4.97039 | Up   |
| Krt20     | 66.9956 | 1.22545 | 0.43929 | 2.78964 | 0.00528  | 0.0389   | 49.9399 | 24.6607 | 45.8075 | 129.504 | 55.6361 | 96.4256 | Up   |
| Gm11560   | 409.774 | 0.42928 | 0.18417 | 2.33092 | 0.01976  | 0.10135  | 408.332 | 326.508 | 312.855 | 439.497 | 543.998 | 427.454 | Up   |
| Krtap17-1 | 121.244 | -1.0054 | 0.4259  | -2.3606 | 0.01824  | 0.09622  | 143.944 | 198.272 | 143.27  | 93.8138 | 114.363 | 33.7987 | Down |
| Krt34     | 12.0551 | 3.78266 | 1.22699 | 3.08288 | 0.00205  | 0.01915  | 4.89606 | 0       | 0       | 26.5126 | 32.9696 | 7.95263 | Up   |
| Krt17     | 14.0527 | -3.6982 | 1.62525 | -2.2755 | 0.02288  | 0.11158  | 70.5033 | 0       | 7.79702 | 2.03943 | 0       | 3.97631 | Down |
| Gm14206   | 37.2697 | -1.2596 | 0.40793 | -3.0878 | 0.00202  | 0.0189   | 68.5449 | 43.4029 | 45.8075 | 19.3746 | 21.6363 | 24.852  | Down |
| Eif1      | 30375.8 | -0.2293 | 0.10787 | -2.1258 | 0.03352  | 0.14625  | 35884.2 | 31961.3 | 30508.8 | 29389.2 | 28447.6 | 26063.7 | Down |
| Hap1      | 1110.79 | -0.9183 | 0.25783 | -3.5615 | 0.00037  | 0.00508  | 1136.87 | 1434.27 | 1787.47 | 730.116 | 548.119 | 1027.88 | Down |
| Ttc25     | 1378.38 | -0.9078 | 0.25024 | -3.6278 | 0.00029  | 0.0042   | 1972.13 | 1295.18 | 2127.61 | 1124.75 | 678.967 | 1071.62 | Down |
| Kcnh4     | 56.4074 | 1.89997 | 0.42722 | 4.44725 | 8.70E-06 | 0.00025  | 26.4387 | 17.7557 | 27.2896 | 101.971 | 112.303 | 52.6862 | Up   |
| Ghdc      | 946.79  | 0.23679 | 0.12055 | 1.96423 | 0.0495   | 0.18967  | 838.206 | 945     | 824.535 | 1054.39 | 1064.3  | 954.315 | Up   |
| Stat5a    | 1056.84 | 0.55564 | 0.12158 | 4.57008 | 4.88E-06 | 0.00015  | 866.603 | 894.692 | 806.017 | 1271.58 | 1357.93 | 1144.18 | Up   |
| Atp6v0a1  | 11069   | 0.48392 | 0.17331 | 2.79227 | 0.00523  | 0.0387   | 8008    | 10975   | 8706.35 | 12320.2 | 15267   | 11137.7 | Up   |
| Naglu     | 2171.74 | 0.26622 | 0.11958 | 2.22626 | 0.026    | 0.12219  | 1788.04 | 1961.02 | 2166.6  | 2403.47 | 2498.47 | 2212.82 | Up   |
| Coasy     | 1950.82 | -0.3018 | 0.10454 | -2.8867 | 0.00389  | 0.03112  | 2108.25 | 2145.48 | 2208.51 | 1893.61 | 1725.75 | 1623.33 | Down |
| Psmc3ip   | 372.011 | -0.6028 | 0.2237  | -2.6946 | 0.00705  | 0.04777  | 485.69  | 376.816 | 483.415 | 342.624 |         |         |      |

|           |         |         |         |         |          |           |         |         |         |         |         |         |      |
|-----------|---------|---------|---------|---------|----------|-----------|---------|---------|---------|---------|---------|---------|------|
| Tmem106   | 2507.76 | 0.59311 | 0.12056 | 4.91961 | 8.67E-07 | 3.54E-05  | 1922.19 | 2038.95 | 2036.97 | 2954.11 | 3383.5  | 2710.85 | Up   |
| Mpp3      | 275.357 | -0.7945 | 0.29218 | -2.7191 | 0.00655  | 0.04548   | 480.793 | 242.662 | 324.551 | 182.529 | 173.09  | 248.52  | Down |
| Nags      | 68.5374 | -1.3899 | 0.32879 | -4.2272 | 2.37E-05 | 0.00057   | 99.8797 | 73.9822 | 123.778 | 34.6703 | 39.1513 | 39.7631 | Down |
| Hrob      | 62.4434 | -1.3338 | 0.36629 | -3.6413 | 0.00027  | 0.00404   | 70.5033 | 72.9958 | 124.752 | 34.6703 | 32.9696 | 38.7691 | Down |
| Asb16     | 6.73703 | -2.2332 | 1.05552 | -2.1157 | 0.03437  | NA        | 2.93764 | 15.7829 | 14.6194 | 2.03943 | 2.0606  | 2.98224 | Down |
| Rundc3a   | 397.558 | 0.64195 | 0.18838 | 3.40779 | 0.00065  | 0.00794   | 271.242 | 369.911 | 290.439 | 477.227 | 547.088 | 429.442 | Up   |
| Grn       | 14058.6 | 0.54162 | 0.13932 | 3.88769 | 0.0001   | 0.00188   | 10322.9 | 12806.8 | 11220.9 | 17085.3 | 18436.2 | 14479.7 | Up   |
| Itga2b    | 649.791 | -1.0974 | 0.23454 | -4.6789 | 2.88E-06 | 9.78E-05  | 641.384 | 818.737 | 1196.84 | 407.886 | 420.362 | 413.537 | Down |
| 2810433D  | 87.9278 | -0.8276 | 0.30899 | -2.6784 | 0.0074   | 0.04947   | 119.464 | 129.222 | 88.6911 | 57.104  | 81.3936 | 51.6921 | Down |
| Ccdc103   | 548.656 | -0.9741 | 0.31073 | -3.1349 | 0.00172  | 0.01668   | 786.308 | 450.798 | 944.414 | 396.669 | 254.484 | 459.264 | Down |
| Gfap      | 123.17  | -0.7903 | 0.25174 | -3.1392 | 0.00169  | 0.01651   | 157.653 | 138.1   | 172.509 | 110.129 | 73.1512 | 87.4789 | Down |
| Nmt1      | 6626.58 | 0.22073 | 0.10628 | 2.0768  | 0.03782  | 0.15879   | 6089.72 | 6563.7  | 5708.39 | 7257.31 | 7537.66 | 6602.67 | Up   |
| Acbd4     | 1813.38 | -0.2312 | 0.09633 | -2.4002 | 0.01639  | 0.08919   | 1844.84 | 1972.86 | 2057.44 | 1624.41 | 1693.81 | 1686.95 | Down |
| Fmn1      | 2066.05 | 0.46027 | 0.1876  | 2.45338 | 0.01415  | 0.07995   | 1564.78 | 2119.84 | 1533.09 | 2277.02 | 2849.81 | 2051.78 | Up   |
| Plekhn1   | 3415.81 | 0.39572 | 0.10642 | 3.7186  | 0.0002   | 0.0032    | 2857.34 | 3125.01 | 2868.33 | 3756.63 | 4228.34 | 3659.2  | Up   |
| Gm39397   | 2.78318 | -3.845  | 1.71773 | -2.2384 | 0.02519  | NA        | 5.87528 | 3.94572 | 5.84776 | 0       | 1.0303  | 0       | Down |
| Rprml     | 127.957 | -0.6976 | 0.32957 | -2.1166 | 0.0343   | 0.14845   | 145.903 | 206.164 | 122.803 | 74.4392 | 133.939 | 84.4967 | Down |
| Nsf       | 3725.53 | 0.48401 | 0.13071 | 3.70283 | 0.00021  | 0.00336   | 3032.62 | 3432.78 | 2853.71 | 4115.57 | 4881.55 | 4036.95 | Up   |
| Arf2      | 3626.68 | 0.28676 | 0.10219 | 2.80623 | 0.00501  | 0.03745   | 3261.76 | 3484.07 | 3056.43 | 3950.38 | 4218.04 | 3789.43 | Up   |
| Crhr1     | 8.19588 | -3.4702 | 1.30615 | -2.6568 | 0.00789  | 0.05194   | 5.87528 | 19.7286 | 19.4925 | 4.07886 | 0       | 0       | Down |
| Myl4      | 1634.26 | -2.3428 | 1.05821 | -2.214  | 0.02683  | 0.12498   | 4326.16 | 362.02  | 3502.81 | 447.655 | 194.726 | 972.209 | Down |
| Marchf10  | 68.9766 | -1.3732 | 0.40537 | -3.3875 | 0.00071  | 0.00834   | 120.443 | 69.0501 | 109.158 | 24.4732 | 36.0604 | 54.6743 | Down |
| Map3k3    | 3024.3  | 0.3425  | 0.10028 | 3.41525 | 0.00064  | 0.00777   | 2817.2  | 2752.14 | 2431.7  | 340.23  | 340.23  | 3401.74 | Up   |
| Limd2     | 7026.21 | 0.28457 | 0.12485 | 2.27932 | 0.02265  | 0.11069   | 6017.26 | 6696.87 | 6292.19 | 7985.39 | 8480.39 | 6685.18 | Up   |
| Ccdc47    | 2651.69 | 0.26845 | 0.11207 | 2.39532 | 0.01661  | 0.09007   | 2441.18 | 2476.92 | 2299.15 | 2701.22 | 2780.78 | 3210.87 | Up   |
| Prr29     | 1978.88 | -0.9128 | 0.26922 | -3.3904 | 0.0007   | 0.0083    | 2961.14 | 1803.19 | 2990.16 | 1695.79 | 917.996 | 1505.03 | Down |
| Ern1      | 2654.12 | 0.21481 | 0.09013 | 2.3832  | 0.01716  | 0.09232   | 2557.7  | 2469.03 | 2343.98 | 2751.19 | 2923.99 | 2878.85 | Up   |
| Tex2      | 2414.17 | 0.21845 | 0.10993 | 1.98719 | 0.0469   | 0.18318   | 2261.98 | 2417.74 | 2015.53 | 2628.83 | 2649.93 | 2511.04 | Up   |
| Milr1     | 343.03  | 1.04129 | 0.25484 | 4.086   | 4.39E-05 | 0.00094   | 170.383 | 304.807 | 197.849 | 463.97  | 527.513 | 393.655 | Up   |
| Cep112    | 242.236 | -0.4996 | 0.22204 | -2.2503 | 0.02443  | 0.11684   | 310.41  | 252.526 | 288.49  | 197.825 | 157.636 | 246.531 | Down |
| Gm11668   | 6.24261 | 2.42118 | 1.08544 | 2.23059 | 0.02571  | NA        | 2.93764 | 2.95929 | 0       | 12.2366 | 12.3636 | 6.95855 | Up   |
| Slc16a6   | 889.862 | 0.50106 | 0.17592 | 2.84829 | 0.0044   | 0.03395   | 706.992 | 882.855 | 620.838 | 910.605 | 1105.51 | 1112.37 | Up   |
| Arsg      | 601.897 | 0.36815 | 0.15733 | 2.34002 | 0.01928  | 0.09967   | 449.459 | 605.668 | 521.426 | 647.519 | 723.27  | 664.044 | Up   |
| Abca9     | 609.13  | 0.6403  | 0.14185 | 4.51398 | 6.36E-06 | 0.00019   | 471.001 | 508.998 | 448.329 | 783.141 | 789.209 | 654.104 | Up   |
| Kcnj2     | 2202.74 | -0.6663 | 0.23765 | -2.8037 | 0.00505  | 0.03768   | 2614.5  | 3596.52 | 1896.62 | 1581.58 | 2014.23 | 1512.99 | Down |
| Sox9      | 59.7715 | -0.9288 | 0.34863 | -2.6641 | 0.00772  | 0.05102   | 94.9836 | 68.0636 | 72.1224 | 30.5914 | 40.1816 | 52.6862 | Down |
| Ttyh2     | 650.242 | 1.03922 | 0.17143 | 6.06187 | 1.35E-09 | 0.116E-07 | 415.186 | 421.205 | 440.532 | 818.831 | 1059.15 | 746.553 | Up   |
| Dnaic2    | 2806.67 | -1.0621 | 0.29828 | -3.5607 | 0.00037  | 0.00509   | 4566.07 | 2292.46 | 4528.12 | 1950.71 | 1230.18 | 2272.46 | Down |
| Kif19a    | 2200.19 | -0.6312 | 0.29199 | -2.1617 | 0.03064  | 0.13706   | 3288.2  | 1628.6  | 3105.16 | 1977.23 | 1188.96 | 2013.01 | Down |
| Gprc5c    | 1882.42 | -0.5912 | 0.27192 | -2.1742 | 0.02969  | 0.13412   | 2617.44 | 1437.23 | 2733.83 | 1618.29 | 1100.36 | 1787.35 | Down |
| Cd300a    | 765.544 | 0.67449 | 0.25754 | 2.61892 | 0.00882  | 0.05645   | 461.209 | 830.574 | 477.567 | 867.777 | 1125.09 | 831.05  | Up   |
| Cd300lb   | 412.477 | 0.83063 | 0.35333 | 2.35088 | 0.01873  | 0.09789   | 213.468 | 481.378 | 195.9   | 472.128 | 667.633 | 444.353 | Up   |
| Cd300ld   | 378.899 | 0.92022 | 0.39526 | 2.32814 | 0.0199   | 0.10194   | 207.593 | 445.866 | 132.549 | 466.01  | 606.846 | 414.531 | Up   |
| Cd300c2   | 1424.67 | 1.06888 | 0.24559 | 4.3523  | 1.35E-05 | 0.00035   | 860.728 | 1230.08 | 668.594 | 1872.2  | 2340.84 | 1575.61 | Up   |
| Nat9      | 1720.48 | -0.5194 | 0.15279 | -3.3991 | 0.00068  | 0.0081    | 2216.94 | 1642.41 | 2221.18 | 1484.7  | 1358.96 | 1398.67 | Down |
| Fdxr      | 502.517 | -0.4185 | 0.14071 | -2.9746 | 0.00293  | 0.02526   | 512.128 | 581.007 | 631.558 | 418.083 | 438.907 | 433.418 | Down |
| Fads6     | 252.713 | -0.9816 | 0.2319  | -4.2331 | 2.30E-05 | 0.00055   | 422.041 | 299.875 | 284.591 | 196.805 | 164.848 | 148.118 | Down |
| Jpt1      | 3612.82 | 0.37356 | 0.14067 | 2.65548 | 0.00792  | 0.05204   | 3255.88 | 3265.08 | 2921.93 | 4158.4  | 4629.13 | 3446.47 | Up   |
| Grb2      | 5755.91 | 0.20176 | 0.09278 | 2.17462 | 0.02966  | 0.13404   | 5413.09 | 5394.78 | 5254.22 | 6200.89 | 6548.58 | 5723.9  | Up   |
| Itgb4     | 1585.17 | -0.4568 | 0.2251  | -2.0293 | 0.04242  | 0.17118   | 2037.74 | 1275.45 | 2189.01 | 1401.09 | 1110.66 | 1497.08 | Down |
| Galk1     | 2139.01 | -0.5748 | 0.09617 | -5.9767 | 2.28E-09 | 1.88E-07  | 2489.16 | 2485.8  | 2703.62 | 1798.78 | 1688.66 | 1668.06 | Down |
| Mrp138    | 2371.44 | -0.2198 | 0.08713 | -2.5224 | 0.01166  | 0.06907   | 2666.4  | 2504.54 | 2484.32 | 2199.53 | 2147.14 | 2226.74 | Down |
| Foxj1     | 10480.6 | -0.7637 | 0.31225 | -2.4457 | 0.01446  | 0.08138   | 15024.1 | 7716.84 | 16833.8 | 9476.21 | 4958.83 | 8874.14 | Down |
| St6galnac | 702.872 | 0.59683 | 0.21649 | 2.75689 | 0.00584  | 0.04191   | 514.087 | 477.432 | 687.112 | 794.358 | 696.482 | 1047.76 | Up   |
| Jmjd6     | 2154.89 | -0.2507 | 0.11653 | -2.1509 | 0.03148  | 0.13952   | 2538.12 | 2251.03 | 2235.79 | 2067.98 | 1788.6  | 2047.8  | Down |
| Septin9   | 5969.81 | 0.38305 | 0.11075 | 3.45874 | 0.00054  | 0.00686   | 5316.15 | 5027.83 | 5201.59 | 6550.65 | 7532.51 | 6190.13 | Up   |
| Gm11734   | 195.852 | -1.5835 | 0.325   | -4.8722 | 1.10E-06 | 4.32E-05  | 336.849 | 207.15  | 337.221 | 82.5969 | 72.1209 | 139.171 | Down |
| Tmc8      | 423.529 | -0.5148 | 0.25086 | -2.0521 | 0.04016  | 0.16534   | 391.685 | 491.242 | 612.066 | 271.244 | 326.605 | 448.329 | Down |
| Dnah17    | 65.2775 | 1.433   | 0.29195 | 4.90844 | 9.18E-07 | 3.71E-05  | 36.2309 | 37.4843 | 32.1627 | 98.9123 | 84.4845 | 102.39  | Up   |
| Cyth1     | 2736.67 | 0.20009 | 0.09272 | 2.15809 | 0.03092  | 0.13777   | 2676.19 | 2580.5  | 2384.91 | 2927.47 | 2928.11 | 2877.86 | Up   |
| Tbc1d16   | 2039.94 | -0.4306 | 0.15571 | -2.7653 | 0.00569  | 0.04112   | 2140.56 | 2537.1  | 2348.85 | 1502.04 | 1645.39 | 2065.7  | Down |
| Ccdc40    | 3383.76 | -1.0652 | 0.29498 | -3.611  | 0.00031  | 0.00442   | 5366.09 | 3030.31 | 5340.96 | 2469.75 | 1352.78 | 2742.66 | Down |
| Card14    | 82.656  | 0.7703  | 0.32606 | 2.36245 | 0.01815  | 0.09607   | 49.9399 | 72.0094 | 61.4015 | 78.518  | 97.8784 | 136.189 | Up   |
| Sgsh      | 571.284 | 0.42343 | 0.12232 | 3.46157 | 0.00054  | 0.00681   | 475.897 | 494.201 | 494.136 | 647.519 | 616.118 | 699.831 | Up   |
| Slc26a11  | 658.341 | 0.47736 | 0.15567 | 3.06649 | 0.00217  | 0.02005   | 535.629 | 617.505 | 498.035 | 804.555 | 826.299 | 668.021 | Up   |
| Nptx1     | 1435.49 | -1.0463 | 0.25952 | -4.0317 | 5.54E-05 | 0.00114   | 1917.3  | 2047.83 | 1838.15 | 701.564 | 725.33  | 1382.76 | Down |
| Baiap2    | 6421.46 | -0.4366 | 0.17978 | -2.4283 | 0.01517  | 0.08406   | 8119.63 | 5855.45 | 8182    | 6118.29 | 4537.43 | 5715.95 | Down |
| Cep131    | 772.162 | -0.5629 | 0.22268 | -2.5279 | 0.01147  | 0.06816   | 895     | 686.555 | 1181.25 | 652.618 | 531.634 | 685.914 | Down |
| Gm11769   | 12.0008 | -1.562  | 0.76886 | -2.0316 | 0.0422   | 0.17067   | 18.605  | 8.87787 | 26.3149 | 8.15772 | 3.0909  | 6.95855 | Down |
| 2900052L  | 375.446 | 0.35144 | 0.16423 | 2.13997 | 0.03236  | 0.14246   | 313.348 | 322.562 | 353.79  | 437.458 | 464.665 | 360.851 | Up   |
| Bahcc1    | 1086.45 | 0.37628 | 0.16129 | 2.33293 | 0.01965  | 0.10092   | 853.874 | 921.325 | 1061.37 | 1153.3  | 1439.33 | 1089.51 | Up   |
| Actg1     | 48322.9 | 0.30596 | 0.08465 | 3.6144  | 0.0003   | 0.00439   | 44901.8 | 42468.8 | 42283.2 | 51853.5 | 56494.4 | 51935.6 | Up   |
| 0610009L  | 168.434 | -0.5109 | 0.2168  | -2.3566 | 0.01844  | 0.09687   | 228.157 | 182.489 | 183.23  | 117.267 | 148.363 | 151.1   | Down |
| Oxld1     | 211.968 | -0.3709 | 0.18121 | -2.0467 | 0.04069  | 0.16654   | 260.471 | 215.042 | 241.708 | 195.785 | 167.939 | 190.863 | Down |
| Gcgr      | 87.966  | -2.4015 | 0.36146 | -6.6439 | 3.06E-11 | 3.88E-09  | 110.651 | 154.869 | 178.357 | 31.6112 | 17.5151 | 34.7927 | Down |
| Mcrip1    | 3300.47 | -0.2731 | 0.10566 | -2.5849 | 0.00974  | 0.06054   | 3532.02 | 3645.84 | 3657.78 | 3198.85 | 3074.41 | 2693.95 | Down |
| Anapc11   | 1751.29 | -0.2454 | 0.0954  | -2.5729 | 0.01009  | 0.06232   | 1958.43 | 1838.7  | 1902.47 | 1684.57 | 1587.69 |         |      |

|           |         |         |         |         |          |          |         |         |         |         |         |         |      |
|-----------|---------|---------|---------|---------|----------|----------|---------|---------|---------|---------|---------|---------|------|
| Narf      | 1264.77 | 0.35115 | 0.15341 | 2.28901 | 0.02208  | 0.109    | 918.502 | 1153.14 | 1263.12 | 1448    | 1487.75 | 1318.15 | Up   |
| Fn3k      | 169.27  | -0.8759 | 0.19555 | -4.479  | 7.50E-06 | 0.00022  | 222.281 | 194.327 | 240.733 | 117.267 | 125.696 | 115.313 | Down |
| Metnrl    | 1045.33 | 0.68026 | 0.25313 | 2.68741 | 0.0072   | 0.04857  | 649.218 | 1112.69 | 648.127 | 1384.77 | 1468.18 | 1008.99 | Up   |
| Dnmt3a    | 2139.7  | 0.32695 | 0.0965  | 3.38815 | 0.0007   | 0.00834  | 1781.19 | 2000.48 | 1913.19 | 2304.56 | 2420.17 | 2418.59 | Up   |
| Efr3b     | 742.526 | 0.33613 | 0.16912 | 1.98746 | 0.04687  | 0.18318  | 623.759 | 781.252 | 564.309 | 741.333 | 873.693 | 870.813 | Up   |
| Ncoa1     | 3113.53 | 0.34088 | 0.07955 | 4.28504 | 1.83E-05 | 0.00045  | 2707.52 | 2835    | 2699.72 | 3468.05 | 3490.65 | 3480.27 | Up   |
| AC241534  | 51.4169 | 0.67888 | 0.33782 | 2.0096  | 0.04447  | 0.17643  | 37.2101 | 41.43   | 39.9597 | 49.966  | 78.3027 | 61.6329 | Up   |
| Itsn2     | 7047.97 | 0.46865 | 0.09935 | 4.717   | 2.39E-06 | 8.46E-05 | 5934.03 | 6257.91 | 5547.58 | 7819.17 | 8731.78 | 7997.36 | Up   |
| Fkbp1b    | 391.42  | 0.80546 | 0.15513 | 5.19233 | 2.08E-07 | 1.05E-05 | 312.369 | 277.187 | 265.099 | 524.133 | 523.392 | 446.341 | Up   |
| Apob      | 122.215 | 2.4353  | 0.54313 | 4.48381 | 7.33E-06 | 0.00022  | 40.1477 | 13.81   | 60.4269 | 113.188 | 331.756 | 173.964 | Up   |
| Gm48898   | 160.337 | 1.74733 | 0.29903 | 5.84342 | 5.11E-09 | 4.03E-07 | 74.4202 | 96.6701 | 49.706  | 259.008 | 285.393 | 196.828 | Up   |
| Sdc1      | 26220.2 | 0.30349 | 0.0733  | 4.14014 | 3.47E-05 | 0.00077  | 23084.9 | 23919.9 | 23412.5 | 29788.9 | 28993.6 | 28121.5 | Up   |
| Wdr35     | 2222.61 | -0.7613 | 0.20869 | -3.6479 | 0.00026  | 0.00397  | 3233.36 | 2138.58 | 3015.5  | 1664.17 | 1317.75 | 1966.29 | Down |
| Gm5182    | 194.977 | 0.64168 | 0.27311 | 2.34954 | 0.0188   | 0.09807  | 200.739 | 152.897 | 103.31  | 236.574 | 259.635 | 216.709 | Up   |
| 7420701IC | 5.24016 | 3.27463 | 1.26637 | 2.58584 | 0.00971  | NA       | 0       | 1.97286 | 0.97463 | 13.2563 | 9.27269 | 5.96447 | Up   |
| Kcns3     | 764.739 | 0.26738 | 0.13424 | 1.99181 | 0.04639  | 0.18179  | 694.262 | 733.904 | 653.975 | 796.397 | 935.511 | 774.387 | Up   |
| Lratd1    | 1545.49 | -1.2724 | 0.33356 | -3.8145 | 0.00014  | 0.00239  | 2461.74 | 1225.15 | 2871.25 | 795.378 | 645.997 | 1273.41 | Down |
| Trib2     | 4740.8  | -0.3035 | 0.1448  | -2.0962 | 0.03606  | 0.15402  | 5900.74 | 4717.11 | 5095.35 | 4080.9  | 3795.62 | 4855.08 | Down |
| Lpin1     | 2337.09 | 0.51473 | 0.13905 | 3.70178 | 0.00021  | 0.00337  | 2030.89 | 1713.43 | 2029.17 | 2508.5  | 3131.08 | 2609.46 | Up   |
| Ntsr2     | 179.388 | -1.353  | 0.42611 | -3.1752 | 0.0015   | 0.01499  | 193.884 | 136.127 | 443.455 | 115.228 | 106.121 | 81.5144 | Down |
| E2f6      | 1844.82 | -0.2379 | 0.08797 | -2.7045 | 0.00684  | 0.04679  | 2054.39 | 1948.2  | 1987.27 | 1661.12 | 1677.33 | 1740.63 | Down |
| Pqlc3     | 3932.19 | 0.29459 | 0.11645 | 2.52981 | 0.01141  | 0.068    | 3600.57 | 3479.14 | 3516.46 | 4175.73 | 4885.68 | 3935.56 | Up   |
| 2410004P  | 3988.13 | -0.6368 | 0.26027 | -2.4468 | 0.01441  | 0.08117  | 5471.84 | 3415.02 | 5676.23 | 3556.77 | 2106.96 | 3701.95 | Down |
| Kcnf1     | 208.837 | -2.376  | 0.37736 | -6.2963 | 3.05E-10 | 2.97E-08 | 483.731 | 384.708 | 182.255 | 56.0843 | 59.7573 | 86.4848 | Down |
| Gm36862   | 14.2433 | -3.2566 | 0.86209 | -3.7775 | 0.00016  | 0.00267  | 45.0438 | 14.7964 | 17.5433 | 2.03943 | 2.0606  | 3.97631 | Down |
| 5730507C  | 74.4401 | 1.18618 | 0.36888 | 3.21568 | 0.0013   | 0.01348  | 35.2517 | 59.1858 | 41.909  | 83.6166 | 142.181 | 84.4967 | Up   |
| Adam17    | 3447.96 | 0.33013 | 0.16218 | 2.0356  | 0.04179  | 0.16966  | 3134.46 | 3595.54 | 2435.59 | 3586.34 | 3932.65 | 4003.15 | Up   |
| 2410018L  | 6.57343 | 2.00624 | 1.01303 | 1.98044 | 0.04765  | NA       | 1.95843 | 4.93215 | 0.97463 | 7.138   | 16.4848 | 7.95263 | Up   |
| Grhl1     | 449.207 | -0.7746 | 0.21644 | -3.5791 | 0.00034  | 0.00485  | 601.237 | 443.893 | 655.924 | 338.545 | 269.938 | 385.702 | Down |
| Id2       | 5210.96 | 0.76913 | 0.19108 | 4.0251  | 5.70E-05 | 0.00116  | 3487.96 | 4718.09 | 3355.64 | 6840.25 | 7591.24 | 5272.59 | Up   |
| Gm36723   | 147.52  | 0.53812 | 0.25292 | 2.12765 | 0.03337  | 0.14575  | 105.755 | 155.856 | 99.412  | 159.076 | 175.151 | 189.869 | Up   |
| Cmpk2     | 1514.23 | -0.3928 | 0.18716 | -2.0985 | 0.03586  | 0.15331  | 1311.17 | 2137.59 | 1708.52 | 1278.72 | 1333.21 | 1316.16 | Down |
| Sh3yl1    | 881.33  | 0.45377 | 0.14295 | 3.17438 | 0.0015   | 0.015    | 631.592 | 785.198 | 814.788 | 1071.72 | 975.693 | 1008.99 | Up   |
| Fam110c   | 428.608 | 0.35021 | 0.1663  | 2.10583 | 0.03522  | 0.15124  | 404.415 | 404.436 | 321.627 | 481.305 | 525.452 | 434.412 | Up   |
| Gm32899   | 5.74228 | -2.9022 | 1.08743 | -2.6688 | 0.00761  | NA       | 12.7298 | 8.87787 | 8.77165 | 1.01971 | 2.0606  | 0.99408 | Down |
| Slc26a4   | 6474.24 | 1.34291 | 0.30605 | 4.38792 | 1.14E-05 | 0.00031  | 3405.7  | 5572.34 | 2005.78 | 8652.28 | 8844.08 | 10365.3 | Up   |
| Bcap29    | 3250.58 | 0.2222  | 0.11238 | 1.97718 | 0.04802  | 0.18621  | 2861.26 | 3337.09 | 2804    | 3340.59 | 3540.11 | 3620.43 | Up   |
| Hbp1      | 632.247 | 0.3464  | 0.1173  | 2.95317 | 0.00315  | 0.02659  | 572.839 | 551.414 | 545.791 | 743.372 | 715.027 | 665.039 | Up   |
| 5430401H  | 27.085  | 1.55717 | 0.57353 | 2.71505 | 0.00663  | 0.04576  | 11.7506 | 21.7015 | 7.79702 | 43.8477 | 24.7272 | 52.6862 | Up   |
| Pik3cg    | 961.64  | 1.09112 | 0.14654 | 7.44583 | 9.63E-14 | 1.90E-11 | 627.675 | 657.949 | 557.487 | 1311.35 | 1469.21 | 1146.17 | Up   |
| Ccdc71l   | 1961.56 | 0.50256 | 0.1331  | 3.77587 | 0.00016  | 0.00268  | 1510.93 | 1742.03 | 1616.91 | 2168.93 | 2622.11 | 2108.44 | Up   |
| Nampt     | 6074.93 | 0.36974 | 0.14862 | 2.48774 | 0.01286  | 0.07427  | 4533.76 | 4992.32 | 6376.01 | 6645.48 | 7063.73 | 6838.27 | Up   |
| Efcab10   | 395.734 | -1.1694 | 0.28749 | -4.0676 | 4.75E-05 | 0.00101  | 654.114 | 354.128 | 635.457 | 264.106 | 180.302 | 286.295 | Down |
| Agr3      | 904.322 | -1.0445 | 0.35038 | -2.981  | 0.00287  | 0.02487  | 1606.89 | 714.175 | 1333.29 | 631.204 | 344.12  | 796.257 | Down |
| Crppa     | 392.848 | -0.3764 | 0.16628 | -2.2636 | 0.0236   | 0.11397  | 392.664 | 420.219 | 518.502 | 327.328 | 354.423 | 343.951 | Down |
| Arl4a     | 2482.47 | -0.754  | 0.26925 | -2.8002 | 0.00511  | 0.03799  | 3563.36 | 1923.54 | 3863.42 | 2202.58 | 1347.27 | 1904.65 | Down |
| Pnpla8    | 5793.58 | 0.246   | 0.10191 | 2.41391 | 0.01578  | 0.08662  | 5568.78 | 5517.1  | 4816.61 | 6123.39 | 6545.49 | 6190.13 | Up   |
| Stxbp6    | 1955.44 | -0.7825 | 0.15025 | -5.2079 | 1.91E-07 | 9.83E-06 | 2841.68 | 2021.19 | 2556.45 | 1441.88 | 1429.02 | 1442.41 | Down |
| Strn3     | 2868.74 | 0.22534 | 0.10952 | 2.05759 | 0.03963  | 0.16409  | 2829.92 | 2573.59 | 2532.08 | 2900.07 | 3018.77 | 3358    | Up   |
| Heatr5a   | 3668.52 | 0.35838 | 0.11775 | 3.04343 | 0.00234  | 0.02129  | 3341.07 | 2973.1  | 3331.28 | 3980.97 | 4571.43 | 3813.29 | Up   |
| Nubpl     | 600.593 | -0.759  | 0.18894 | -4.0171 | 5.89E-05 | 0.00119  | 802.954 | 585.939 | 876.19  | 475.187 | 407.998 | 455.288 | Down |
| Gm47431   | 64.6665 | -1.6434 | 0.45262 | -3.6309 | 0.00028  | 0.00417  | 130.235 | 80.8872 | 82.8433 | 42.828  | 14.4242 | 36.7809 | Down |
| Akap6     | 542.165 | -1.1919 | 0.32582 | -5.8901 | 3.86E-09 | 3.12E-07 | 1078.11 | 540.563 | 954.16  | 245.751 | 141.151 | 293.253 | Down |
| Sptssa    | 4529.68 | -0.2137 | 0.09892 | -2.1606 | 0.03072  | 0.13726  | 4993.99 | 4541.52 | 5058.32 | 4316.45 | 3931.62 | 4336.17 | Down |
| Baz1a     | 2528.87 | 0.54969 | 0.11895 | 4.6214  | 3.81E-06 | 0.00012  | 2182.67 | 1985.68 | 1990.19 | 3325.29 | 2722.05 | 2967.32 | Up   |
| Nfkbia    | 6632.2  | 0.40861 | 0.13029 | 3.13622 | 0.00171  | 0.01663  | 5681.39 | 5484.55 | 5931.58 | 8491.17 | 7750.94 | 6453.56 | Up   |
| Gm36634   | 35.4734 | -2.1384 | 0.64037 | -3.3393 | 0.00084  | 0.00957  | 67.5657 | 55.2401 | 50.6806 | 20.3943 | 2.0606  | 16.8993 | Down |
| Gm47682   | 29.0422 | -1.1279 | 0.41713 | -2.7039 | 0.00685  | 0.04685  | 38.1893 | 41.43   | 39.9597 | 19.3746 | 14.4242 | 20.8756 | Down |
| Pax9      | 148.101 | -3.2152 | 1.6343  | -1.9673 | 0.04914  | 0.189    | 645.301 | 1.97286 | 154.966 | 20.3943 | 10.303  | 55.6684 | Down |
| Gm2568    | 73.0738 | -1.4317 | 0.67543 | -2.1197 | 0.03403  | 0.14769  | 151.778 | 43.4029 | 124.752 | 33.6506 | 10.303  | 74.5559 | Down |
| Foxa1     | 5025.55 | -0.4574 | 0.18078 | -2.5303 | 0.0114   | 0.06795  | 6641.02 | 4758.54 | 6047.56 | 4233.86 | 3500.95 | 4971.39 | Down |
| Mia2      | 7744.03 | 0.23578 | 0.08546 | 2.75887 | 0.0058   | 0.04176  | 7197.21 | 7083.55 | 7057.28 | 8389.19 | 7907.54 | 8829.41 | Up   |
| 4930471E  | 9.81612 | -2.8697 | 1.05437 | -2.7217 | 0.00649  | 0.04514  | 26.4387 | 2.95929 | 22.4164 | 2.03943 | 2.0606  | 2.98224 | Down |
| Gm31063   | 272.074 | -2.7423 | 1.22353 | -2.2413 | 0.025    | 0.11883  | 883.25  | 78.9144 | 458.075 | 40.7886 | 12.3636 | 159.053 | Down |
| Wdr20rt   | 34.9648 | -3.0202 | 1.09298 | -2.7633 | 0.00572  | 0.0413   | 125.339 | 5.91858 | 55.5538 | 3.05914 | 1.0303  | 18.8875 | Down |
| Rpl17-ps3 | 497.161 | -0.2458 | 0.12085 | -2.0341 | 0.04194  | 0.17006  | 525.837 | 555.36  | 537.02  | 474.167 | 449.21  | 441.371 | Down |
| Gm47518   | 2.03794 | 4.49809 | 2.05826 | 2.18538 | 0.02886  | NA       | 0       | 0       | 0       | 6.11829 | 4.12119 | 1.98816 | Up   |
| Pole2     | 161.076 | 0.55016 | 0.23878 | 2.30405 | 0.02122  | 0.10646  | 104.776 | 155.856 | 131.575 | 163.154 | 213.272 | 197.822 | Up   |
| Nemf      | 4037.19 | 0.22737 | 0.09251 | 2.45766 | 0.01398  | 0.07919  | 3950.14 | 3644.86 | 3564.21 | 4475.53 | 4171.68 | 4416.69 | Up   |
| Arl6      | 4003.71 | 0.21569 | 0.09965 | 2.1645  | 0.03043  | 0.13644  | 3931.54 | 3610.33 | 3572.98 | 4589.74 | 4246.89 | 4070.75 | Up   |
| L2hgdh    | 769.465 | -0.3229 | 0.12466 | -2.5898 | 0.0096   | 0.05994  | 849.957 | 926.257 | 789.448 | 722.978 | 652.179 | 675.973 | Down |
| Dmac2l    | 953.552 | -0.4089 | 0.13657 | -2.9941 | 0.00275  | 0.02407  | 1130.01 | 1055.48 | 1077.94 | 921.822 | 712.967 | 823.097 | Down |
| Cdk11     | 308.456 | -1.2655 | 0.28058 | -4.5105 | 6.47E-06 | 0.00019  | 461.209 | 321.576 | 524.349 | 216.18  | 123.636 | 203.786 | Down |
| 4930512B  | 6.55857 | -2.7615 | 1.05981 | -2.6057 | 0.00917  | NA       | 11.7506 | 11.8372 | 10.7209 | 0       | 2.0606  | 2.98224 | Down |
| At1l      | 448.865 | -0.5359 | 0.16428 | -3.2624 | 0.0011   | 0.0119   | 505.274 | 484.337 | 604.269 | 404.827 | 328.665 | 365.821 | Down |
| Sav1      | 1971.67 | 0.37282 | 0.11942 | 3.12205 | 0.0018   | 0.01724  | 1821.34 | 1755.84 | 1577.92 | 2088.38 | 2145.08 | 2441.46 | Up   |
| Nin       | 3160.18 | -0.2392 | 0.12133 | -1.9712 | 0.0487   | 0.18768  | 3615.25 | 3472.23 | 3177.28 |         |         |         |      |

|           |         |         |         |         |          |          |         |         |         |         |         |         |      |
|-----------|---------|---------|---------|---------|----------|----------|---------|---------|---------|---------|---------|---------|------|
| Six4      | 984.408 | -1.1287 | 0.32552 | -3.4674 | 0.00053  | 0.00671  | 1370.9  | 808.872 | 1873.23 | 680.15  | 403.877 | 769.417 | Down |
| Mnat1     | 1560.09 | -0.3392 | 0.13221 | -2.5658 | 0.01029  | 0.06325  | 1727.33 | 1535.87 | 1964.85 | 1386.81 | 1302.3  | 1443.4  | Down |
| Prkch     | 4218.06 | 0.23844 | 0.11442 | 2.08387 | 0.03717  | 0.15698  | 4352.6  | 3680.37 | 3577.86 | 4449.02 | 4711.55 | 4536.97 | Up   |
| Dbpht2    | 11.2943 | -2.2049 | 1.04477 | -2.1104 | 0.03482  | 0.14998  | 26.4387 | 2.95929 | 26.3149 | 2.03943 | 2.0606  | 7.95263 | Down |
| Rhoj      | 2367.66 | 0.82953 | 0.29344 | 2.82688 | 0.0047   | 0.03578  | 1234.79 | 2658.43 | 1222.18 | 2940.86 | 3458.71 | 2690.97 | Up   |
| Sgpp1     | 4040.14 | -0.2672 | 0.12035 | -2.2204 | 0.02639  | 0.12361  | 4618.95 | 4018.71 | 4602.19 | 3687.29 | 3316.53 | 3997.19 | Down |
| Hspa2     | 2376.8  | -0.8478 | 0.27628 | -3.0688 | 0.00215  | 0.01993  | 3650.51 | 2161.27 | 3355.64 | 2000.68 | 1078.72 | 2014    | Down |
| Ppp1r36   | 3083.67 | -1.1602 | 0.31742 | -3.6552 | 0.00026  | 0.00389  | 4950.9  | 2663.36 | 5168.45 | 2288.24 | 1117.87 | 2313.22 | Down |
| Sptb      | 192.527 | -0.6678 | 0.24506 | -2.725  | 0.00643  | 0.04484  | 235.011 | 181.503 | 292.388 | 168.253 | 131.878 | 146.13  | Down |
| Mpp5      | 5405.29 | 0.23331 | 0.11468 | 2.03436 | 0.04191  | 0.17006  | 4441.71 | 4906.5  | 5559.27 | 5815.43 | 5897.43 | 5811.38 | Up   |
| Arg2      | 594.448 | 0.47696 | 0.18121 | 2.63205 | 0.00849  | 0.05495  | 595.361 | 417.26  | 478.542 | 621.006 | 768.603 | 685.914 | Up   |
| Zfyve26   | 1674.69 | 0.54952 | 0.1304  | 4.21405 | 2.51E-05 | 0.00059  | 1262.21 | 1526.01 | 1290.41 | 1901.77 | 2177.02 | 1890.74 | Up   |
| Rad51b    | 778.64  | -0.9    | 0.29131 | -3.0893 | 0.00201  | 0.01884  | 944.94  | 776.32  | 1320.62 | 473.148 | 387.392 | 769.417 | Down |
| 9430078K  | 119.252 | -1.4298 | 0.38885 | -3.6771 | 0.00024  | 0.00365  | 192.905 | 130.209 | 198.824 | 53.0252 | 39.1513 | 101.396 | Down |
| Plekhd1os | 159.158 | -0.5814 | 0.24287 | -2.3939 | 0.01667  | 0.09038  | 196.822 | 202.218 | 173.484 | 105.031 | 114.363 | 163.029 | Down |
| Plekhd1   | 3506.03 | 0.34629 | 0.1462  | 2.36866 | 0.01785  | 0.09498  | 3046.33 | 3268.04 | 2947.27 | 3716.86 | 4655.92 | 3401.74 | Up   |
| Susd6     | 12771   | 0.29658 | 0.13018 | 2.27822 | 0.02271  | 0.11095  | 10488.3 | 13081   | 10819.3 | 13121.7 | 13734.9 | 15380.4 | Up   |
| Smoc1     | 471.619 | -2.2337 | 0.44811 | -4.9847 | 6.21E-07 | 2.70E-05 | 1103.57 | 247.594 | 982.424 | 167.233 | 137.03  | 191.857 | Down |
| Rgs6      | 518.484 | -0.442  | 0.17479 | -2.5288 | 0.01145  | 0.06807  | 533.671 | 654.003 | 604.269 | 360.979 | 471.877 | 486.104 | Down |
| Acot1     | 1989.59 | -0.6456 | 0.28173 | -2.2914 | 0.02194  | 0.10854  | 3025.77 | 2883.33 | 1373.25 | 1752.14 | 1541.33 | 1318.15 | Down |
| Dnal1     | 2920.23 | -0.4993 | 0.20939 | -2.3845 | 0.0171   | 0.09211  | 3736.68 | 2600.23 | 3924.82 | 2570.7  | 1890.6  | 2798.33 | Down |
| Pnma1     | 141.767 | -0.592  | 0.28139 | -2.1039 | 0.03539  | 0.15178  | 224.24  | 134.154 | 153.016 | 102.991 | 102     | 134.201 | Down |
| Fam161b   | 1126.37 | -0.7012 | 0.29783 | -2.3545 | 0.01855  | 0.09728  | 1520.72 | 915.407 | 1748.48 | 965.67  | 551.21  | 1056.71 | Down |
| Entpd5    | 3913.58 | -0.646  | 0.21841 | -2.9575 | 0.0031   | 0.02635  | 4475    | 3719.83 | 6131.38 | 3157.04 | 2430.47 | 3567.75 | Down |
| Bbpf1     | 693.985 | -0.9496 | 0.30934 | -3.0698 | 0.00214  | 0.01988  | 958.649 | 596.79  | 1188.07 | 560.843 | 301.877 | 557.678 | Down |
| Aldh6a1   | 169.98  | -0.8077 | 0.27071 | -2.9835 | 0.00285  | 0.02474  | 235.99  | 150.924 | 262.175 | 125.425 | 108.181 | 137.183 | Down |
| Abcd4     | 1552.82 | 0.47596 | 0.18372 | 2.59062 | 0.00958  | 0.05987  | 1173.1  | 1520.09 | 1203.66 | 1772.26 | 2164.66 | 1483.17 | Up   |
| Npc2      | 133932  | 0.28674 | 0.14588 | 1.96554 | 0.04935  | 0.18927  | 114878  | 144382  | 102737  | 144527  | 153537  | 143528  | Up   |
| Ltpb2     | 4336.32 | 0.27245 | 0.09107 | 2.99167 | 0.00277  | 0.02418  | 3752.34 | 4069.02 | 3962.83 | 5009.86 | 4631.19 | 4592.64 | Up   |
| Arel1     | 1520.95 | 0.24437 | 0.12117 | 2.01672 | 0.04373  | 0.17471  | 1421.82 | 1418.49 | 1337.19 | 1502.04 | 1603.14 | 1843.02 | Up   |
| Pgf       | 298.202 | 0.93243 | 0.1952  | 4.7767  | 1.78E-06 | 6.50E-05 | 214.448 | 167.693 | 232.936 | 423.182 | 407.998 | 342.957 | Up   |
| Eif2b2    | 2753.05 | -0.2622 | 0.10302 | -2.5448 | 0.01093  | 0.06598  | 3072.77 | 2879.39 | 3055.46 | 2658.4  | 2295.5  | 2556.77 | Down |
| Acyp1     | 395.853 | -0.2723 | 0.1355  | -2.0097 | 0.04447  | 0.17643  | 453.376 | 407.395 | 438.582 | 358.94  | 342.059 | 374.768 | Down |
| Zc2hc1c   | 894.997 | -0.501  | 0.20999 | -2.3858 | 0.01704  | 0.09184  | 1218.14 | 789.144 | 1139.34 | 796.397 | 606.846 | 820.115 | Down |
| Flvcr2    | 929.536 | 0.93193 | 0.1795  | 5.19172 | 2.08E-07 | 1.05E-05 | 613.966 | 640.193 | 663.721 | 1264.45 | 1446.54 | 948.351 | Up   |
| Ttlf5     | 1039.1  | -0.3197 | 0.1276  | -2.5051 | 0.01224  | 0.07163  | 1191.7  | 1034.76 | 1234.85 | 906.527 | 872.663 | 994.079 | Down |
| Ifit43    | 3514.83 | -0.4905 | 0.13916 | -3.5246 | 0.00042  | 0.00565  | 4374.14 | 3558.05 | 4387.77 | 3124.41 | 2579.87 | 3064.74 | Down |
| Vash1     | 123.823 | 0.52437 | 0.25861 | 2.02762 | 0.0426   | 0.17166  | 126.318 | 81.8737 | 96.4881 | 166.214 | 131.878 | 140.165 | Up   |
| Gstz1     | 5670.35 | -0.3162 | 0.14057 | -2.2495 | 0.02448  | 0.11694  | 6922.05 | 5451.01 | 6494.92 | 5274.99 | 4438.53 | 5440.59 | Down |
| Samd15    | 53.9873 | -1.01   | 0.44696 | -2.2598 | 0.02383  | 0.11482  | 80.2954 | 57.2129 | 78.9448 | 56.0843 | 19.5757 | 31.8105 | Down |
| Ahsa1     | 6476.74 | -0.3093 | 0.13204 | -2.3424 | 0.01916  | 0.09937  | 8073.61 | 6616.97 | 6814.59 | 6098.91 | 5129.86 | 6126.51 | Down |
| Ism2      | 21.3943 | -1.9572 | 0.70963 | -2.758  | 0.00581  | 0.04183  | 46.023  | 44.3893 | 11.6955 | 9.17743 | 5.15149 | 11.9289 | Down |
| Cep128    | 1008.12 | -0.5826 | 0.235   | -2.4793 | 0.01316  | 0.07565  | 1296.48 | 912.447 | 1418.08 | 817.811 | 606.846 | 997.061 | Down |
| Tshr      | 63.3317 | -2.6359 | 0.5066  | -5.203  | 1.96E-07 | 1.00E-05 | 184.092 | 80.8872 | 62.3761 | 17.3352 | 14.4242 | 20.8756 | Down |
| Ston2     | 1621.38 | -0.2637 | 0.1044  | -2.526  | 0.01154  | 0.06846  | 1896.74 | 1761.76 | 1649.07 | 1440.86 | 1458.9  | 1520.94 | Down |
| Seil1     | 9434.98 | 0.2077  | 0.0815  | 2.54861 | 0.01082  | 0.06552  | 9218.31 | 8438.91 | 8613.76 | 9888.11 | 10067   | 10283.7 | Up   |
| Spat7     | 703.675 | -0.5346 | 0.2095  | -2.5518 | 0.01072  | 0.06512  | 892.063 | 612.573 | 993.145 | 564.922 | 516.18  | 643.169 | Down |
| Eml5      | 579.031 | -0.468  | 0.17546 | -2.6675 | 0.00764  | 0.05065  | 655.093 | 646.111 | 715.376 | 490.483 | 392.544 | 574.577 | Down |
| Efcab11   | 248.308 | -1.3638 | 0.31942 | -4.2698 | 1.96E-05 | 0.00048  | 447.5   | 228.852 | 396.673 | 154.997 | 95.8178 | 166.011 | Down |
| Kcnk13    | 329.45  | 0.98012 | 0.29624 | 3.30854 | 0.00094  | 0.01045  | 183.113 | 273.241 | 208.57  | 380.354 | 621.27  | 310.153 | Up   |
| 4930477G  | 4.56082 | 3.04792 | 1.53061 | 1.99131 | 0.04645  | NA       | 0       | 2.95929 | 0       | 3.05914 | 13.3939 | 7.95263 | Up   |
| Gm10433   | 48.3703 | -1.0996 | 0.33517 | -3.2808 | 0.00104  | 0.01128  | 62.6696 | 58.1993 | 76.9956 | 33.6506 | 29.8787 | 28.8283 | Down |
| Ttc7b     | 1328.42 | 0.37708 | 0.14898 | 2.53116 | 0.01137  | 0.06785  | 1144.7  | 1312.94 | 1009.71 | 1408.23 | 1678.36 | 1416.56 | Up   |
| Rps6ka5   | 640.168 | 0.37067 | 0.13256 | 2.79632 | 0.00517  | 0.03832  | 492.544 | 602.708 | 579.903 | 708.702 | 730.482 | 726.671 | Up   |
| Ppp4r3a   | 1098.06 | 0.41142 | 0.1618  | 2.54272 | 0.011    | 0.06625  | 946.899 | 880.882 | 999.968 | 1141.06 | 1106.54 | 1512.99 | Up   |
| Catsperb  | 290.329 | 1.15558 | 0.39615 | 2.91699 | 0.00353  | 0.029    | 76.3786 | 275.214 | 188.103 | 388.511 | 469.816 | 343.951 | Up   |
| Tc2n      | 3916.07 | 0.60795 | 0.22124 | 2.74798 | 0.006    | 0.04271  | 2353.05 | 4228.82 | 2727.01 | 4391.91 | 5286.46 | 4509.14 | Up   |
| Lgmn      | 9261.22 | 0.39511 | 0.12005 | 3.2911  | 0.001    | 0.01098  | 7453.77 | 9020.9  | 7528.02 | 11016   | 10774.9 | 9773.78 | Up   |
| Unc97     | 606.865 | -2.6583 | 0.33332 | -7.9751 | 1.52E-15 | 4.57E-13 | 83.2727 | 658.935 | 1647.12 | 132.563 | 184.423 | 180.922 | Down |
| Otub2     | 623.463 | -0.4025 | 0.12684 | -3.1734 | 0.00151  | 0.01503  | 682.511 | 705.297 | 741.691 | 573.08  | 548.119 | 490.081 | Down |
| Ifi27     | 9164.47 | -0.4059 | 0.1056  | -3.8442 | 0.00012  | 0.00217  | 10016.4 | 11225.6 | 10094.2 | 8542.15 | 7423.3  | 7685.22 | Down |
| Gm47267   | 15.6492 | -1.4433 | 0.66297 | -2.177  | 0.02948  | 0.1335   | 19.5843 | 31.5657 | 17.5433 | 8.15772 | 4.12119 | 12.923  | Down |
| Serpina16 | 5.41512 | -2.8003 | 1.18355 | -2.366  | 0.01798  | NA       | 6.85449 | 7.89144 | 13.6448 | 2.03943 | 2.0606  | 0       | Down |
| Serpina3n | 9082.83 | 0.50563 | 0.17425 | 2.90173 | 0.00371  | 0.03011  | 6137.71 | 9168.86 | 7215.17 | 11386.1 | 11303.4 | 9285.69 | Up   |
| Gm28875   | 300.015 | -0.352  | 0.15402 | -2.2854 | 0.02229  | 0.1097   | 335.87  | 314.671 | 358.663 | 260.027 | 283.332 | 247.526 | Down |
| Snhg10    | 48.9356 | -0.8356 | 0.37119 | -2.251  | 0.02438  | 0.11673  | 84.2123 | 55.2401 | 48.7314 | 36.7097 | 31.9393 | 36.7809 | Down |
| D430019f  | 362.665 | 0.51381 | 0.21982 | 2.33742 | 0.01942  | 0.1001   | 262.429 | 355.115 | 278.743 | 333.447 | 505.877 | 440.377 | Up   |
| Ak7       | 5563.55 | -0.9754 | 0.32956 | -2.9598 | 0.00308  | 0.02621  | 9419.05 | 4516.86 | 8191.74 | 3736.24 | 2238.84 | 5278.56 | Down |
| Gm19554   | 11.1739 | -1.6593 | 0.79529 | -2.0864 | 0.03694  | 0.1566   | 22.5219 | 14.7964 | 13.6448 | 4.07886 | 2.0606  | 9.94079 | Down |
| Evl       | 427.317 | 0.69759 | 0.22328 | 3.12428 | 0.00178  | 0.01713  | 329.995 | 387.667 | 260.225 | 494.562 | 649.088 | 442.365 | Up   |
| Slc25a47  | 359.654 | -0.4469 | 0.22228 | -2.0106 | 0.04437  | 0.17627  | 425.958 | 342.291 | 476.593 | 326.309 | 233.878 | 352.898 | Down |
| Wdr25     | 353.179 | -0.605  | 0.1861  | -3.2509 | 0.00115  | 0.01232  | 405.394 | 395.558 | 477.567 | 326.309 | 234.908 | 279.336 | Down |
| Gm34081   | 2.37357 | 4.71831 | 1.94712 | 2.42323 | 0.01538  | NA       | 0       | 0       | 0       | 7.138   | 4.12119 | 2.98224 | Up   |
| Meg3      | 1087.05 | 2.13646 | 0.37799 | 5.65215 | 1.58E-08 | 1.10E-06 | 337.828 | 436.002 | 434.684 | 1201.22 | 3112.53 | 1000.04 | Up   |
| Rian      | 698.281 | 1.67014 | 0.34801 | 4.79916 | 1.59E-06 | 5.90E-05 | 331.953 | 339.332 | 330.399 | 745.412 | 1785.51 | 657.086 | Up   |
| Mirg      | 41.1767 | 1.49655 | 0.50649 | 2.95477 | 0.00313  | 0.0265   | 18.605  | 16.7693 | 29.2388 | 43.8477 | 96.8481 | 41.7513 | Up   |
| Dio3os    | 24.1967 | -1.7364 | 0.50016 | -3.4716 | 0.00052  | 0.00663  | 31.3348 | 32.5522 | 47.7567 | 13.2563 | 11.3333 | 8.94671 | Down |
| B930059U  | 25.282  | -0.9485 |         |         |          |          |         |         |         |         |         |         |      |

|           |         |         |         |         |          |          |         |         |         |         |         |         |      |
|-----------|---------|---------|---------|---------|----------|----------|---------|---------|---------|---------|---------|---------|------|
| Mark3     | 3977.67 | -0.2096 | 0.08324 | -2.5187 | 0.01178  | 0.06963  | 4343.79 | 4384.68 | 4070.04 | 3752.55 | 3691.56 | 3623.42 | Down |
| Ckb       | 5477.07 | -0.4165 | 0.20407 | -2.041  | 0.04125  | 0.16818  | 7095.38 | 4455.7  | 7235.63 | 5348.4  | 4419.98 | 4307.34 | Down |
| Klc1      | 4978.61 | 0.28354 | 0.09414 | 3.01199 | 0.0026   | 0.02304  | 4226.28 | 4421.18 | 4825.38 | 5369.82 | 5421.43 | 5607.6  | Up   |
| Xrcc3     | 48.1933 | -1.454  | 0.6369  | -2.2829 | 0.02244  | 0.11016  | 133.173 | 56.2265 | 22.4164 | 29.5717 | 29.8787 | 17.8934 | Down |
| 5033406C  | 124.082 | 0.87796 | 0.34246 | 2.56368 | 0.01036  | 0.06351  | 58.7528 | 70.0365 | 133.524 | 168.253 | 163.817 | 150.106 | Up   |
| Aspg      | 319.496 | -2.556  | 0.49982 | -5.1139 | 3.16E-07 | 1.52E-05 | 932.211 | 454.744 | 251.454 | 144.8   | 44.3028 | 89.4671 | Down |
| A530016L  | 55.4433 | -9.2147 | 2.15278 | -4.2804 | 1.87E-05 | 0.00046  | 223.261 | 101.602 | 7.79702 | 0       | 0       | 0       | Down |
| Tmem179   | 13.4352 | -4.2336 | 1.20587 | -3.5108 | 0.00045  | 0.0059   | 41.1269 | 26.6336 | 8.77165 | 4.07886 | 0       | 0       | Down |
| Adssl1    | 2593.85 | -1.4488 | 0.13444 | -10.776 | 4.45E-27 | 6.01E-24 | 3577.06 | 3415.02 | 4398.49 | 1341.94 | 1370.3  | 1460.3  | Down |
| Siva1     | 1163.03 | -0.7043 | 0.10831 | -6.5024 | 7.90E-11 | 8.80E-09 | 1349.36 | 1484.58 | 1490.21 | 922.842 | 891.208 | 839.996 | Down |
| Ahnak2    | 2058.73 | 1.08695 | 0.24811 | 4.38092 | 1.18E-05 | 0.00032  | 1051.67 | 1344.5  | 1557.45 | 2951.05 | 3566.89 | 1880.8  | Up   |
| Clba1     | 1848.97 | -0.9675 | 0.1742  | -5.5539 | 2.79E-08 | 1.79E-06 | 2971.91 | 2283.58 | 2084.73 | 1327.67 | 1084.9  | 1341.01 | Down |
| Gpr132    | 457.273 | 0.79778 | 0.29133 | 2.73845 | 0.00617  | 0.04364  | 210.531 | 488.283 | 303.109 | 603.671 | 617.149 | 520.897 | Up   |
| Jag2      | 2750.7  | -0.3897 | 0.16022 | -2.4322 | 0.01501  | 0.08347  | 3252.94 | 2521.31 | 3585.65 | 2460.57 | 2165.69 | 2518    | Down |
| Nudt14    | 1573.2  | -0.5384 | 0.14723 | -3.6565 | 0.00026  | 0.00387  | 1778.25 | 1638.46 | 2173.42 | 1356.22 | 1178.66 | 1314.17 | Down |
| Gm26583   | 179.477 | -3.6467 | 0.90797 | -4.0163 | 5.91E-05 | 0.0012   | 661.948 | 248.58  | 86.7418 | 13.2563 | 20.606  | 45.7276 | Down |
| Crip1     | 3640.1  | -0.721  | 0.30634 | -2.3534 | 0.0186   | 0.09738  | 7078.73 | 3444.61 | 3070.08 | 2980.63 | 3137.26 | 2129.32 | Down |
| Tmem121   | 34.2512 | -2.5834 | 0.5563  | -4.6439 | 3.42E-06 | 0.00011  | 76.3786 | 28.6065 | 71.1478 | 10.1971 | 8.24239 | 10.9349 | Down |
| Ighm      | 15064.1 | 1.4018  | 0.22186 | 6.3185  | 2.64E-10 | 2.66E-08 | 6752.65 | 10663.3 | 7399.37 | 25377.6 | 16550.7 | 23641.2 | Up   |
| Ighv2-2   | 82.1206 | 2.60636 | 0.81581 | 3.1948  | 0.0014   | 0.0142   | 30.3556 | 11.8372 | 27.2896 | 180.49  | 231.817 | 10.9349 | Up   |
| Ighv2-3   | 10.2509 | 3.24346 | 0.97331 | 3.33241 | 0.00086  | 0.00975  | 0       | 1.97286 | 3.89851 | 12.2366 | 18.5454 | 24.852  | Up   |
| Ighv5-9   | 13.6072 | 3.23169 | 1.17929 | 2.74036 | 0.00614  | 0.04344  | 0       | 4.93215 | 2.92388 | 27.5323 | 43.2725 | 2.98224 | Up   |
| Ighv5-16  | 31.6286 | 5.98553 | 1.36592 | 4.38206 | 1.18E-05 | 0.00032  | 0       | 2.95929 | 0       | 4.07886 | 51.5149 | 131.218 | Up   |
| Ighv4-1   | 77.2725 | 3.55494 | 1.57371 | 2.25896 | 0.02389  | 0.11504  | 18.605  | 17.7557 | 0       | 28.552  | 87.5754 | 311.147 | Up   |
| Ighv4-2   | 4.42941 | -4.5499 | 2.03697 | -2.2336 | 0.02551  | NA       | 13.709  | 11.8372 | 0       | 0       | 1.0303  | 0       | Down |
| Ighv3-2   | 6.86171 | -6.2003 | 2.19066 | -2.8303 | 0.00465  | NA       | 35.2517 | 5.91858 | 0       | 0       | 0       | 0       | Down |
| Ighv11-2  | 28.6333 | 3.41692 | 0.77771 | 4.39356 | 1.12E-05 | 0.0003   | 4.89606 | 5.91858 | 3.89851 | 97.8926 | 15.4545 | 43.7395 | Up   |
| Ighv7-3   | 92.5765 | 2.854   | 0.81071 | 3.52039 | 0.00043  | 0.00573  | 29.3764 | 8.87787 | 29.2388 | 70.3603 | 30.909  | 386.697 | Up   |
| Ighv14-4  | 36.7376 | 2.04042 | 0.57102 | 3.57326 | 0.00035  | 0.00491  | 17.6258 | 9.8643  | 15.594  | 91.7743 | 58.727  | 26.8401 | Up   |
| Ighv3-5   | 6.64588 | 5.20552 | 1.59909 | 3.2553  | 0.00113  | NA       | 0       | 0       | 0.97463 | 10.1971 | 24.7272 | 3.97631 | Up   |
| Ighv3-6   | 61.0077 | 2.83581 | 0.60875 | 4.65841 | 3.19E-06 | 0.00011  | 10.7713 | 5.91858 | 28.2642 | 124.405 | 52.5452 | 144.141 | Up   |
| Ighv3-8   | 15.2229 | -2.8635 | 1.30733 | -2.1903 | 0.0285   | 0.13047  | 67.5657 | 7.89144 | 4.87314 | 0       | 2.0606  | 8.94671 | Down |
| Ighv6-6   | 190.136 | 4.60548 | 0.58588 | 7.86077 | 3.82E-15 | 1.08E-12 | 11.7506 | 8.87787 | 24.3657 | 666.894 | 126.727 | 302.2   | Up   |
| Ighv10-1  | 19.3904 | 2.22377 | 0.88534 | 2.51177 | 0.01201  | 0.0706   | 5.87528 | 0.98643 | 13.6448 | 39.7689 | 11.3333 | 44.7335 | Up   |
| Ighv1-9   | 60.0306 | 1.8253  | 0.73917 | 2.4694  | 0.01353  | 0.07726  | 51.8983 | 4.93215 | 22.4164 | 87.6955 | 152.484 | 40.7572 | Up   |
| Ighv1-12  | 42.461  | 2.99674 | 0.67696 | 4.42673 | 9.57E-06 | 0.00027  | 1.95843 | 5.91858 | 20.4672 | 56.0843 | 94.7875 | 75.55   | Up   |
| Ighv1-14  | 6.56972 | -5.1377 | 1.98805 | -2.5843 | 0.00976  | NA       | 9.79213 | 28.6065 | 0       | 1.01971 | 0       | 0       | Down |
| Ighv1-20  | 2.0397  | 4.49919 | 2.04947 | 2.19529 | 0.02814  | NA       | 0       | 0       | 0       | 5.09857 | 5.15149 | 1.98816 | Up   |
| Ighv1-21  | 2.12567 | -4.5096 | 2.15362 | -2.0939 | 0.03626  | NA       | 7.8337  | 3.94572 | 0.97463 | 0       | 0       | 0       | Down |
| Ighv1-26  | 47.2945 | 1.90448 | 0.47103 | 4.04327 | 5.27E-05 | 0.0011   | 8.81291 | 28.6065 | 22.4164 | 59.1435 | 78.3027 | 86.4848 | Up   |
| Ighv1-33  | 5.23871 | -3.8589 | 1.67172 | -2.3083 | 0.02098  | NA       | 23.5011 | 4.93215 | 0.97463 | 0       | 1.0303  | 0.99408 | Down |
| Ighv1-39  | 14.9472 | 3.38659 | 0.94426 | 3.58648 | 0.00034  | 0.00476  | 0       | 1.97286 | 5.84776 | 34.6703 | 13.3939 | 33.7987 | Up   |
| Ighv1-42  | 6.22481 | 2.15283 | 0.98429 | 2.1872  | 0.02873  | NA       | 0.97921 | 1.97286 | 3.89851 | 8.15772 | 13.3939 | 8.94671 | Up   |
| Ighv1-47  | 8.66941 | 4.05728 | 1.38442 | 2.93067 | 0.00338  | 0.0281   | 0.97921 | 1.97286 | 0       | 30.5914 | 16.4848 | 1.98816 | Up   |
| Ighv1-53  | 41.2617 | 2.24646 | 0.83127 | 2.70244 | 0.00688  | 0.04697  | 30.3556 | 4.93215 | 7.79702 | 142.76  | 30.909  | 30.8164 | Up   |
| Ighv1-55  | 101.803 | 4.52261 | 0.46122 | 9.80565 | 1.06E-22 | 9.59E-20 | 8.81291 | 4.93215 | 11.6955 | 252.889 | 211.211 | 121.278 | Up   |
| Ighv1-58  | 14.3944 | 3.3195  | 1.48778 | 2.23119 | 0.02567  | 0.12104  | 0       | 5.91858 | 1.94925 | 73.4195 | 3.0909  | 1.98816 | Up   |
| Ighv1-62- | 3.71986 | 3.37147 | 1.58828 | 2.12271 | 0.03378  | NA       | 0       | 1.97286 | 0       | 4.07886 | 10.303  | 5.96447 | Up   |
| Ighv8-11  | 6.04216 | -5.015  | 2.24178 | -2.237  | 0.02528  | NA       | 34.2724 | 0.98643 | 0       | 0       | 0       | 0.99408 | Down |
| Ighv1-69  | 233.829 | 3.94845 | 1.23663 | 3.19292 | 0.00141  | 0.01426  | 31.3348 | 34.525  | 19.4925 | 44.8675 | 122.606 | 1150.15 | Up   |
| Ighv8-12  | 33.8032 | 2.15257 | 0.59507 | 3.61735 | 0.0003   | 0.00434  | 16.6466 | 11.8372 | 8.77165 | 24.4732 | 54.6058 | 86.4848 | Up   |
| Ighv1-82  | 71.4845 | 3.19892 | 0.75502 | 4.23687 | 2.27E-05 | 0.00054  | 33.2932 | 4.93215 | 3.89851 | 81.5772 | 85.5148 | 219.691 | Up   |
| Ighv1-83  | 9.6411  | -4.7996 | 1.96025 | -2.4484 | 0.01435  | 0.08091  | 49.9399 | 5.91858 | 0       | 0       | 0       | 1.98816 | Down |
| Ighv1-84  | 9.83939 | -3.7529 | 1.61911 | -2.3179 | 0.02046  | 0.10384  | 39.1685 | 15.7829 | 0       | 0       | 3.0909  | 0.99408 | Down |
| Gm9260    | 135.654 | -1.1054 | 0.40253 | -2.7463 | 0.00603  | 0.04289  | 231.094 | 84.8329 | 239.758 | 83.6166 | 75.2118 | 99.4079 | Down |
| Wdr60     | 2071.55 | -0.6917 | 0.23112 | -2.9929 | 0.00276  | 0.0241   | 3056.12 | 1863.37 | 2757.22 | 1611.15 | 1220.9  | 1920.56 | Down |
| Esy2      | 9369.27 | 0.27436 | 0.12027 | 2.28121 | 0.02254  | 0.11046  | 7575.19 | 8315.6  | 9552.32 | 9711.76 | 10581.2 | 10479.6 | Up   |
| Dnah11    | 1486.68 | -0.7849 | 0.26202 | -2.9954 | 0.00274  | 0.02398  | 2104.33 | 1393.83 | 2146.13 | 1113.53 | 739.754 | 1422.53 | Down |
| Irgb8     | 108.638 | 0.52266 | 0.2271  | 2.30149 | 0.02136  | 0.10682  | 78.337  | 90.7515 | 98.4374 | 131.543 | 120.545 | 132.212 | Up   |
| Ncoa4-ps  | 227.502 | 0.92293 | 0.18635 | 4.95273 | 7.32E-07 | 3.07E-05 | 175.279 | 139.087 | 156.915 | 296.737 | 362.605 | 270.389 | Up   |
| Macc1     | 1278.41 | -0.4574 | 0.16241 | -2.816  | 0.00486  | 0.03655  | 1452.17 | 1372.12 | 1613.98 | 1021.75 | 921.087 | 1289.32 | Down |
| Gm16505   | 51.6421 | -1.821  | 0.52141 | -3.4925 | 0.00048  | 0.00624  | 65.6073 | 114.426 | 61.4015 | 27.5323 | 31.9393 | 8.94671 | Down |
| Calml3    | 726.523 | -2.1839 | 0.70027 | -3.1186 | 0.00182  | 0.01737  | 1816.44 | 502.093 | 1254.35 | 181.509 | 151.454 | 453.3   | Down |
| Akr1c21   | 10.0046 | 3.20151 | 1.20671 | 2.6531  | 0.00798  | 0.05232  | 0       | 3.94572 | 1.94925 | 12.2366 | 4.12119 | 37.775  | Up   |
| Gm35330   | 164.561 | -0.5989 | 0.27976 | -2.1408 | 0.03229  | 0.14235  | 146.882 | 201.232 | 246.581 | 101.971 | 153.514 | 137.183 | Down |
| Gm47507   | 34.9963 | 1.71419 | 0.47747 | 3.59017 | 0.00033  | 0.0047   | 18.605  | 21.7015 | 8.77165 | 43.8477 | 49.4543 | 67.5973 | Up   |
| Gm46401   | 30.4117 | 1.32908 | 0.45957 | 2.89203 | 0.00383  | 0.03077  | 20.5635 | 18.7422 | 12.6702 | 33.6506 | 40.1816 | 56.6625 | Up   |
| Gm10029   | 8.21955 | -2.8276 | 0.98381 | -2.8741 | 0.00405  | 0.03194  | 10.7713 | 24.6607 | 7.79702 | 2.03943 | 2.0606  | 1.98816 | Down |
| Gm5191    | 10.3633 | 1.4515  | 0.71494 | 2.03026 | 0.04233  | 0.17098  | 7.8337  | 3.94572 | 4.87314 | 14.276  | 12.3636 | 18.8875 | Up   |
| Adarb2    | 141.335 | 0.50294 | 0.24044 | 2.09171 | 0.03646  | 0.15516  | 122.402 | 105.548 | 122.803 | 164.174 | 199.878 | 133.207 | Up   |
| Idi1      | 2396.4  | 0.49461 | 0.12911 | 3.83092 | 0.00013  | 0.00227  | 2109.22 | 2127.73 | 1731.91 | 2584.98 | 2863.2  | 2961.36 | Up   |
| Gm36264   | 54.8099 | -2.455  | 0.46301 | -5.3023 | 1.14E-07 | 6.22E-06 | 58.7528 | 88.7787 | 130.6   | 23.4534 | 12.3636 | 14.9112 | Down |
| Zmynd11   | 1297.84 | 0.34097 | 0.14403 | 2.36746 | 0.01791  | 0.09518  | 1204.43 | 1088.03 | 1143.24 | 1341.94 | 1310.54 | 1698.88 | Up   |
| Chrm3     | 288.398 | -0.6453 | 0.31629 | -2.0402 | 0.04133  | 0.16839  | 363.288 | 273.241 | 419.09  | 240.653 | 132.908 | 301.206 | Down |
| Ryr2      | 633.95  | -1.9966 | 0.39515 | -5.0529 | 4.35E-07 | 1.99E-05 | 1245.56 | 475.459 | 1320.62 | 215.16  | 174.12  | 372.779 | Down |
| Ero1lb    | 979.077 | 1.6913  | 0.63924 | 2.6458  | 0.00815  | 0.05324  | 419.103 | 497.161 | 472.694 | 1570.36 | 466.725 | 2448.42 | Up   |
| Gpr137b-  | 1123.03 | 2.02645 | 0.37924 | 5.34348 | 9.12E-08 | 5.13E-06 | 404.415 | 460.663 | 462.948 | 1818.15 | 746.966 | 2845.05 | Up   |
| Gm7046    | 34.7346 | -2.3234 | 0.7349  | -3.1616 | 0.00157  | 0.01557  | 82.2539 | 64.1179 | 27.2896 | 20.3943 | 12.3636 | 1.      |      |

|           |         |         |         |         |          |          |         |         |         |         |         |         |      |
|-----------|---------|---------|---------|---------|----------|----------|---------|---------|---------|---------|---------|---------|------|
| Sfrp4     | 67.9292 | -0.8272 | 0.27781 | -2.9776 | 0.00291  | 0.02507  | 85.1915 | 88.7787 | 86.7418 | 44.8675 | 45.3331 | 56.6625 | Down |
| Aoah      | 163.858 | 1.38376 | 0.38372 | 3.60617 | 0.00031  | 0.00449  | 69.5241 | 96.6701 | 106.234 | 184.568 | 149.393 | 376.756 | Up   |
| Gpx6      | 27.4535 | 8.25052 | 3.9084  | 2.11097 | 0.03477  | 0.14983  | 0       | 0       | 0       | 67.3012 | 0       | 97.4197 | Up   |
| AK157302  | 105.081 | -0.6798 | 0.33368 | -2.0374 | 0.04161  | 0.16916  | 99.8797 | 139.087 | 149.118 | 78.518  | 109.212 | 54.6743 | Down |
| Zfp184    | 147.205 | -0.7371 | 0.21642 | -3.4058 | 0.00066  | 0.00798  | 186.05  | 198.272 | 167.636 | 119.307 | 119.515 | 92.4493 | Down |
| H4c9      | 251.434 | -0.8911 | 0.4492  | -1.9837 | 0.04729  | 0.18419  | 381.893 | 300.861 | 297.261 | 144.8   | 313.211 | 70.5796 | Down |
| Btn1a1    | 2.02939 | 4.49271 | 1.9953  | 2.25165 | 0.02434  | NA       | 0       | 0       | 0       | 4.07886 | 4.12119 | 3.97631 | Up   |
| Btn2a2    | 10.0749 | 2.05411 | 0.92947 | 2.20998 | 0.02711  | 0.1256   | 4.89606 | 0       | 6.82239 | 17.3352 | 16.4848 | 14.9112 | Up   |
| H4c8      | 65.7524 | -1.1912 | 0.44221 | -2.6936 | 0.00707  | 0.04784  | 135.131 | 64.1179 | 75.0463 | 46.9069 | 49.4543 | 23.8579 | Down |
| H1f3      | 84.9738 | -0.8898 | 0.28876 | -3.0816 | 0.00206  | 0.0192   | 134.152 | 86.8058 | 110.133 | 60.1632 | 64.9088 | 53.6802 | Down |
| H2bc6     | 599.919 | -0.6586 | 0.1741  | -3.783  | 0.00015  | 0.00262  | 753.015 | 744.754 | 705.63  | 479.266 | 546.058 | 370.791 | Down |
| H1f4      | 41.1392 | -1.003  | 0.37105 | -2.7031 | 0.00687  | 0.04691  | 66.5865 | 52.2808 | 45.8075 | 23.4534 | 29.8787 | 28.8283 | Down |
| H4c3      | 43.2913 | -1.831  | 0.53998 | -3.3909 | 0.0007   | 0.0083   | 108.693 | 38.4708 | 55.5538 | 15.2957 | 27.8181 | 13.9171 | Down |
| H1f2      | 5503.24 | -0.4999 | 0.14602 | -3.4235 | 0.00062  | 0.00761  | 7035.64 | 6382.2  | 5923.78 | 4910.95 | 4979.43 | 3787.44 | Down |
| Ripor2    | 1403.65 | -0.3889 | 0.13657 | -2.8479 | 0.0044   | 0.03396  | 1368.94 | 1691.73 | 1714.37 | 1238.95 | 1279.63 | 1128.28 | Down |
| Acot13    | 1772.13 | -0.447  | 0.12303 | -3.6332 | 0.00028  | 0.00414  | 2135.66 | 1961.02 | 2036.97 | 1558.12 | 1315.69 | 1625.32 | Down |
| Dcdc2a    | 907.576 | -1.4654 | 0.33707 | -4.3473 | 1.38E-05 | 0.00036  | 1914.36 | 953.877 | 1129.59 | 461.931 | 298.787 | 686.908 | Down |
| Gm11353   | 159.979 | -0.4164 | 0.20956 | -1.9872 | 0.0469   | 0.18318  | 181.154 | 183.476 | 184.205 | 134.602 | 115.393 | 161.041 | Down |
| E2f3      | 563.978 | 0.4284  | 0.12583 | 3.40454 | 0.00066  | 0.00801  | 439.667 | 490.256 | 512.654 | 640.381 | 640.846 | 660.068 | Up   |
| Gm29675   | 33.7875 | -1.0635 | 0.50187 | -2.1191 | 0.03408  | 0.14784  | 33.2932 | 48.3351 | 55.5538 | 15.2957 | 15.4545 | 34.7927 | Down |
| Foxq1     | 561.471 | -0.625  | 0.21883 | -2.8561 | 0.00429  | 0.03338  | 704.054 | 532.672 | 806.991 | 501.7   | 348.241 | 475.17  | Down |
| Gmds      | 920.448 | 0.41429 | 0.13778 | 3.00685 | 0.00264  | 0.0233   | 874.437 | 723.053 | 769.956 | 1037.05 | 1153.93 | 964.256 | Up   |
| Gmyl4     | 38.1399 | -2.1449 | 1.09361 | -1.9613 | 0.04984  | 0.19052  | 106.734 | 0.98643 | 78.9448 | 8.15772 | 6.18179 | 27.8342 | Down |
| Serpinb1a | 2066.98 | 0.64685 | 0.18095 | 3.57482 | 0.00035  | 0.0049   | 1749.85 | 1543.76 | 1539.91 | 2232.16 | 3194.96 | 2141.25 | Up   |
| Serpinb1b | 118.773 | -1.2074 | 0.3541  | -3.4097 | 0.00065  | 0.0079   | 197.801 | 110.48  | 189.078 | 53.0252 | 62.8482 | 99.4079 | Down |
| Ripk1     | 2762.98 | 0.31888 | 0.09987 | 3.1928  | 0.00141  | 0.01426  | 2602.75 | 2455.22 | 2318.64 | 2894.97 | 3190.83 | 3115.44 | Up   |
| Bphl      | 5658.14 | -0.7263 | 0.1928  | -3.7671 | 0.00017  | 0.00275  | 7406.77 | 5811.06 | 7941.26 | 4885.45 | 3261.92 | 4642.35 | Down |
| Gm40909   | 10.2211 | 1.53996 | 0.76215 | 2.02053 | 0.04333  | 0.17364  | 4.89606 | 6.90501 | 3.89851 | 8.15772 | 19.5757 | 17.8934 | Up   |
| Pxd1      | 9767.71 | -0.313  | 0.09622 | -3.253  | 0.00114  | 0.01224  | 11772.1 | 10443.3 | 10254.1 | 8752.21 | 8486.57 | 8898    | Down |
| Fam217a   | 78.5474 | -1.0997 | 0.27565 | -3.9895 | 6.62E-05 | 0.00132  | 120.443 | 96.6701 | 104.285 | 47.9266 | 44.3028 | 57.6566 | Down |
| Eci2      | 682.271 | 0.31458 | 0.1417  | 2.21994 | 0.02642  | 0.12367  | 641.384 | 645.125 | 537.994 | 811.693 | 766.542 | 690.885 | Up   |
| Ly86      | 777.656 | 0.56135 | 0.20652 | 2.71808 | 0.00657  | 0.04557  | 474.918 | 782.239 | 627.66  | 932.019 | 823.208 | 1025.89 | Up   |
| Gm47732   | 20.0606 | -1.6981 | 0.62379 | -2.7222 | 0.00649  | 0.04512  | 46.023  | 15.7829 | 30.2134 | 10.1971 | 7.21209 | 10.9349 | Down |
| Gm47754   | 41.696  | 1.28929 | 0.48155 | 2.67737 | 0.00742  | 0.04955  | 24.4803 | 35.5115 | 12.6702 | 41.8083 | 71.0906 | 64.6151 | Up   |
| Rreb1     | 3037.17 | 0.27518 | 0.14017 | 1.96312 | 0.04963  | 0.19008  | 2605.69 | 3028.34 | 2611.03 | 3345.68 | 3754.41 | 2877.86 | Up   |
| Gcnt2     | 556.241 | 0.64892 | 0.13376 | 4.85154 | 1.23E-06 | 4.74E-05 | 455.334 | 436.002 | 408.369 | 623.046 | 682.058 | 732.636 | Up   |
| Mak       | 2171.9  | -0.7147 | 0.28202 | -2.5344 | 0.01126  | 0.0675   | 3160.9  | 1725.27 | 3211.4  | 1834.47 | 1126.12 | 1973.25 | Down |
| Elov2     | 11.3732 | -1.4516 | 0.70979 | -2.0451 | 0.04084  | 0.16697  | 9.79213 | 17.7557 | 22.4164 | 5.09857 | 7.21209 | 5.96447 | Down |
| Tmem170   | 2653.92 | 0.28692 | 0.10713 | 2.67815 | 0.0074   | 0.04948  | 2331.51 | 2630.81 | 2210.45 | 2898.03 | 2872.47 | 2980.25 | Up   |
| Adtrp     | 138.418 | 1.97316 | 0.3134  | 6.2959  | 3.06E-10 | 2.97E-08 | 50.9191 | 56.2265 | 61.4015 | 245.751 | 274.059 | 142.153 | Up   |
| Edn1      | 3003.08 | 1.07496 | 0.28984 | 3.70879 | 0.00021  | 0.0033   | 1265.14 | 2265.83 | 2268.93 | 5619.65 | 3738.95 | 2859.96 | Up   |
| Cd83      | 1521.68 | 0.40717 | 0.19489 | 2.08926 | 0.03668  | 0.15579  | 1307.25 | 1634.51 | 983.399 | 1607.07 | 1760.78 | 1837.06 | Up   |
| 1700029N  | 12.7396 | 1.6346  | 0.62555 | 2.61307 | 0.00897  | 0.05716  | 6.85449 | 5.91858 | 5.84776 | 21.414  | 17.5151 | 18.8875 | Up   |
| Gm40932   | 8.41551 | 2.44162 | 1.06528 | 2.29199 | 0.02191  | 0.10849  | 1.95843 | 3.94572 | 1.94925 | 29.5717 | 4.12119 | 8.94671 | Up   |
| Stmnd1    | 1886.1  | -0.9753 | 0.34619 | -2.8172 | 0.00484  | 0.03644  | 3394.93 | 1322.8  | 2783.54 | 1411.29 | 802.602 | 1601.46 | Down |
| Rbm24     | 1219.44 | -1.1867 | 0.30087 | -3.9442 | 8.01E-05 | 0.00154  | 1985.84 | 1335.63 | 1762.13 | 684.229 | 453.331 | 1095.47 | Down |
| Cap2      | 771.853 | -0.5243 | 0.17409 | -3.0118 | 0.0026   | 0.02304  | 1015.44 | 827.614 | 888.86  | 634.263 | 522.361 | 742.577 | Down |
| Kif13a    | 4593.24 | 0.23512 | 0.09216 | 2.5513  | 0.01073  | 0.06512  | 4041.21 | 4361.01 | 4257.17 | 4667.24 | 5169.01 | 5063.84 | Up   |
| Gm48648   | 1.95974 | -4.3925 | 2.0519  | -2.1407 | 0.0323   | NA       | 5.87528 | 2.95929 | 2.92388 | 0       | 0       | 0       | Down |
| Wnk2      | 90.103  | -1.276  | 0.35981 | -3.5462 | 0.00039  | 0.00533  | 129.256 | 79.9008 | 173.484 | 52.0055 | 45.3331 | 60.6388 | Down |
| Susd3     | 289.165 | 1.41595 | 0.35028 | 4.04234 | 5.29E-05 | 0.0011   | 101.838 | 225.892 | 145.219 | 420.123 | 563.573 | 278.342 | Up   |
| Fgd3      | 403.882 | 0.64102 | 0.24273 | 2.64094 | 0.00827  | 0.05382  | 248.72  | 430.083 | 268.023 | 460.911 | 554.301 | 461.252 | Up   |
| Hist1h2a1 | 148.514 | -1.1777 | 0.37336 | -3.1542 | 0.00161  | 0.01584  | 283.972 | 220.96  | 113.057 | 81.5772 | 75.2118 | 116.307 | Down |
| Diras2    | 2987.3  | -1.2258 | 0.51592 | -2.3758 | 0.01751  | 0.0936   | 5254.46 | 2125.76 | 5175.27 | 1933.38 | 1058.12 | 2376.84 | Down |
| Syk       | 4167.29 | 0.90009 | 0.15438 | 5.83024 | 5.53E-09 | 4.33E-07 | 2691.86 | 3498.87 | 2533.06 | 4966.01 | 5750.1  | 5563.86 | Up   |
| BB123696  | 20.8839 | -1.6418 | 0.79578 | -2.0632 | 0.0391   | 0.16252  | 28.3972 | 18.7422 | 47.7567 | 20.3943 | 2.0606  | 7.95263 | Down |
| Auh       | 1908.36 | -0.2363 | 0.11277 | -2.0954 | 0.03613  | 0.15417  | 2140.56 | 2089.26 | 1962.9  | 1819.17 | 1858.66 | 1579.59 | Down |
| Nfil3     | 1214.78 | -0.8687 | 0.37137 | -2.3391 | 0.01933  | 0.09984  | 1991.72 | 2080.38 | 637.406 | 955.473 | 915.935 | 707.784 | Down |
| Gm33424   | 139.051 | -1.9026 | 0.40845 | -4.658  | 3.19E-06 | 0.00011  | 195.843 | 121.331 | 341.12  | 59.1435 | 44.3028 | 72.5677 | Down |
| Gm48336   | 41.2621 | -2.4016 | 0.68263 | -3.5182 | 0.00043  | 0.00576  | 51.8983 | 30.5793 | 125.727 | 5.09857 | 13.3939 | 20.8756 | Down |
| Ror2      | 119.94  | 0.64882 | 0.26997 | 2.40331 | 0.01625  | 0.08855  | 96.9421 | 80.8872 | 102.336 | 146.839 | 180.302 | 112.331 | Up   |
| Gm2762    | 8.89657 | 3.31006 | 1.09769 | 3.01548 | 0.00257  | 0.02286  | 1.95843 | 0       | 2.92388 | 22.4337 | 6.18179 | 19.8816 | Up   |
| Tspan17   | 2353.63 | 0.28158 | 0.12768 | 2.2053  | 0.02743  | 0.1268   | 2099.43 | 2174.09 | 2100.32 | 2533.99 | 2940.47 | 2273.46 | Up   |
| Unc5a     | 85.0353 | 3.51374 | 0.83861 | 4.18994 | 2.79E-05 | 0.00065  | 17.6258 | 3.94572 | 19.4925 | 252.889 | 15.4545 | 200.804 | Up   |
| Hk3       | 417.277 | 1.25762 | 0.2348  | 5.35626 | 8.50E-08 | 4.89E-06 | 211.51  | 283.105 | 243.657 | 562.883 | 754.178 | 448.329 | Up   |
| Prr7      | 180.225 | -0.8663 | 0.2543  | -3.4065 | 0.00066  | 0.00797  | 256.554 | 185.449 | 256.327 | 151.938 | 97.8784 | 133.207 | Down |
| Dok3      | 1313.91 | 0.4801  | 0.20157 | 2.3818  | 0.01723  | 0.09262  | 868.562 | 1330.69 | 1092.56 | 1432.7  | 1831.87 | 1327.09 | Up   |
| Cam1      | 2175.29 | -0.2232 | 0.09521 | -2.3446 | 0.01905  | 0.09891  | 2414.74 | 2213.55 | 2401.48 | 2082.26 | 1928.72 | 2011.02 | Down |
| Pcbd2     | 350.693 | -0.3573 | 0.14496 | -2.4647 | 0.01371  | 0.07806  | 385.81  | 381.748 | 414.217 | 312.033 | 282.302 | 328.046 | Down |
| Pitx1     | 52.3758 | -3.0241 | 0.58331 | -5.1844 | 2.17E-07 | 1.08E-05 | 147.861 | 37.4843 | 94.5388 | 11.2169 | 8.24239 | 14.9112 | Down |
| Macroh2a  | 3049.83 | 0.24608 | 0.09218 | 2.66948 | 0.0076   | 0.05043  | 2933.72 | 2686.05 | 2751.37 | 3311.01 | 3173.32 | 3443.49 | Up   |
| Tifab     | 637.473 | 0.8132  | 0.26979 | 3.01425 | 0.00258  | 0.02295  | 333.912 | 632.301 | 421.039 | 745.412 | 1025.15 | 667.027 | Up   |
| Tgfb1     | 6224.34 | 0.69417 | 0.13659 | 5.08213 | 3.73E-07 | 1.76E-05 | 5093.86 | 5241.89 | 3929.7  | 7597.9  | 7802.45 | 7680.25 | Up   |
| Spock1    | 17.263  | -1.7121 | 0.67733 | -2.5277 | 0.01148  | 0.06818  | 16.6466 | 31.5657 | 31.1881 | 4.07886 | 6.18179 | 13.9171 | Down |
| Khl3      | 316.471 | -0.8587 | 0.24103 | -3.5624 | 0.00037  | 0.00507  | 477.856 | 284.092 | 461.973 | 210.061 | 215.332 | 249.514 | Down |
| Gm26555   | 655.867 | -0.7432 | 0.30499 | -2.4367 | 0.01482  | 0.08274  | 992.922 | 562.265 | 908.353 | 586.336 | 299.817 | 585.512 | Down |
| Ntrk2     | 2371.36 | 1.63606 | 0.23334 | 7.01132 | 2.36E-12 | 3.54E-10 | 911.647 | 1069.29 | 1482.41 | 4619.31 | 3084.71 | 3060.77 | Up   |
| Gol       |         |         |         |         |          |          |         |         |         |         |         |         |      |

|           |         |         |         |         |          |          |         |         |         |         |         |         |      |
|-----------|---------|---------|---------|---------|----------|----------|---------|---------|---------|---------|---------|---------|------|
| Gm3604    | 147.357 | 1.25827 | 0.24631 | 5.10858 | 3.25E-07 | 1.55E-05 | 65.6073 | 91.738  | 103.31  | 185.588 | 212.241 | 225.656 | Up   |
| 6720489N  | 205.014 | 0.56594 | 0.19649 | 2.88024 | 0.00397  | 0.03155  | 140.027 | 172.625 | 183.23  | 260.027 | 254.484 | 219.691 | Up   |
| Platr25   | 522.161 | 0.37765 | 0.14425 | 2.61811 | 0.00884  | 0.05652  | 426.937 | 489.269 | 446.379 | 542.488 | 656.3   | 571.595 | Up   |
| Gm48795   | 8.58156 | -1.6852 | 0.84719 | -1.9892 | 0.04668  | 0.18257  | 13.709  | 17.7557 | 7.79702 | 6.11829 | 4.12119 | 1.98816 | Down |
| Fbp1      | 637.573 | -0.93   | 0.38106 | -2.4405 | 0.01467  | 0.08216  | 576.756 | 1084.09 | 847.926 | 197.825 | 523.392 | 595.453 | Down |
| Ptch1     | 3430.34 | 0.31363 | 0.11829 | 2.65136 | 0.00802  | 0.05257  | 2975.83 | 3284.81 | 2916.08 | 3671.99 | 4224.22 | 3509.1  | Up   |
| 1700024IC | 10.2349 | -1.4728 | 0.71755 | -2.0525 | 0.04012  | 0.1653   | 13.709  | 19.7286 | 11.6955 | 6.11829 | 6.18179 | 3.97631 | Down |
| Cdc14b    | 838.625 | 0.28167 | 0.1359  | 2.07263 | 0.03821  | 0.15999  | 693.283 | 812.818 | 765.082 | 946.295 | 822.178 | 992.09  | Up   |
| Ctsl      | 11977.2 | 0.25034 | 0.10031 | 2.49562 | 0.01257  | 0.07299  | 10903.5 | 10329.9 | 11588.3 | 14006.8 | 12683   | 12351.4 | Up   |
| Cdk20     | 434.905 | -0.4493 | 0.17937 | -2.505  | 0.01224  | 0.07163  | 499.399 | 413.314 | 593.548 | 374.235 | 347.211 | 381.726 | Down |
| Ptdss1    | 1510.6  | 0.28632 | 0.09711 | 2.94849 | 0.00319  | 0.02685  | 1438.46 | 1296.17 | 1348.88 | 1681.51 | 1675.27 | 1623.33 | Up   |
| 4933433G  | 145.549 | 0.83413 | 0.30912 | 2.69842 | 0.00697  | 0.04736  | 98.9005 | 129.222 | 85.7672 | 212.101 | 123.636 | 223.668 | Up   |
| Zfp759    | 309.868 | -0.2889 | 0.14316 | -2.0181 | 0.04358  | 0.17438  | 347.621 | 355.115 | 319.678 | 277.362 | 276.12  | 283.312 | Down |
| Rsl1      | 344.219 | 0.87044 | 0.26342 | 3.30437 | 0.00095  | 0.01057  | 233.053 | 259.431 | 237.809 | 581.237 | 290.544 | 463.241 | Up   |
| Zfp874a   | 491.403 | 0.52179 | 0.20605 | 2.53231 | 0.01133  | 0.06771  | 427.916 | 413.314 | 369.384 | 562.883 | 450.24  | 724.683 | Up   |
| Zfp738    | 348.045 | 0.33775 | 0.15452 | 2.18581 | 0.02883  | 0.13156  | 286.909 | 328.481 | 307.008 | 407.886 | 410.059 | 347.927 | Up   |
| 1700001L  | 607.615 | -0.9401 | 0.27149 | -3.4627 | 0.00053  | 0.00679  | 857.79  | 564.238 | 974.627 | 485.384 | 288.484 | 475.17  | Down |
| Gm40999   | 153.288 | 1.01944 | 0.26657 | 3.82433 | 0.00013  | 0.00232  | 103.797 | 100.616 | 99.412  | 272.264 | 160.727 | 182.91  | Up   |
| Clptm1l   | 8934.5  | 0.22086 | 0.09786 | 2.25691 | 0.02401  | 0.11556  | 8460.4  | 8596.73 | 7698.58 | 9773.97 | 10065   | 9012.32 | Up   |
| E430024IC | 562.673 | 0.33401 | 0.1272  | 2.62579 | 0.00864  | 0.05561  | 482.752 | 499.133 | 511.679 | 583.277 | 620.24  | 678.956 | Up   |
| Cast      | 5884.88 | 0.36292 | 0.09239 | 3.9281  | 8.56E-05 | 0.00163  | 5060.57 | 5016.98 | 5368.25 | 6294.7  | 6520.76 | 7048.02 | Up   |
| Fam81b    | 1149.38 | -0.7991 | 0.30529 | -2.6175 | 0.00886  | 0.0566   | 1664.66 | 1017.01 | 1697.8  | 968.729 | 489.392 | 1058.69 | Down |
| Mctp1     | 1265.64 | 0.52568 | 0.22847 | 2.3009  | 0.0214   | 0.10689  | 770.64  | 1308.99 | 1033.1  | 1839.57 | 1337.33 | 1304.23 | Up   |
| Sif1      | 1148.56 | -0.3752 | 0.18027 | -2.081  | 0.03743  | 0.15772  | 1341.52 | 1155.11 | 1394.69 | 1030.93 | 787.148 | 1181.96 | Down |
| 2210408I  | 1061.68 | -0.648  | 0.25568 | -2.5343 | 0.01127  | 0.06751  | 1419.86 | 982.484 | 1486.31 | 821.89  | 577.997 | 1081.56 | Down |
| 5430425K  | 248.408 | -1.084  | 0.29413 | -3.6855 | 0.00023  | 0.00355  | 256.554 | 320.59  | 435.658 | 184.568 | 108.181 | 184.899 | Down |
| Adgrv1    | 215.606 | -1.3855 | 0.37285 | -3.7159 | 0.0002   | 0.00322  | 281.034 | 212.082 | 442.481 | 148.878 | 67.9997 | 141.159 | Down |
| Ccnh      | 1640.51 | 0.23007 | 0.11164 | 2.06085 | 0.03932  | 0.1631   | 1441.4  | 1618.73 | 1469.74 | 1881.37 | 1788.6  | 1643.21 | Up   |
| Rasa1     | 1214.05 | 0.32983 | 0.16633 | 1.98299 | 0.04737  | 0.1844   | 1231.85 | 965.715 | 1030.18 | 1219.58 | 1241.51 | 1595.5  | Up   |
| Edil3     | 756.085 | -0.3643 | 0.17942 | -2.0303 | 0.04232  | 0.17098  | 847.998 | 1024.9  | 680.29  | 624.066 | 660.421 | 698.837 | Down |
| Ssbp2     | 1469.75 | -0.2358 | 0.11287 | -2.089  | 0.0367   | 0.1558   | 1624.51 | 1482.6  | 1661.74 | 1370.5  | 1246.66 | 1432.47 | Down |
| Ckmt2     | 229.058 | -2.4023 | 0.9682  | -2.4812 | 0.01309  | 0.07538  | 654.114 | 57.2129 | 444.43  | 58.1237 | 40.1816 | 120.284 | Down |
| Fam151b   | 751.293 | -0.3963 | 0.17296 | -2.2915 | 0.02193  | 0.10854  | 968.441 | 705.297 | 887.885 | 652.618 | 571.816 | 721.701 | Down |
| Cmya5     | 212.637 | -1.2145 | 0.33856 | -3.5873 | 0.00033  | 0.00475  | 363.288 | 169.666 | 358.663 | 158.056 | 98.9087 | 127.242 | Down |
| Tent2     | 3305.5  | 0.2104  | 0.09218 | 2.28244 | 0.02246  | 0.11021  | 2944.49 | 3253.24 | 2996.98 | 3679.13 | 3495.8  | 3463.37 | Up   |
| Lhfp12    | 1163.82 | 0.97917 | 0.31371 | 3.12129 | 0.0018   | 0.01727  | 854.853 | 1074.22 | 421.039 | 1400.07 | 1922.54 | 1310.2  | Up   |
| Scamp1    | 8488.16 | 0.2885  | 0.11385 | 2.53393 | 0.01128  | 0.06751  | 7484.12 | 8382.68 | 7060.2  | 8698.17 | 9268.56 | 10035.2 | Up   |
| Gm32089   | 2.01556 | 4.48385 | 2.15109 | 2.08446 | 0.03712  | NA       | 0       | 0       | 0       | 5.09857 | 1.0303  | 5.96447 | Up   |
| Sv2c      | 59.6218 | -1.3979 | 0.62384 | -2.2408 | 0.02504  | 0.11894  | 143.944 | 30.5793 | 84.7926 | 14.276  | 46.3634 | 3.7775  | Down |
| Col4a3bp  | 5757.73 | 0.26214 | 0.09083 | 2.88621 | 0.0039   | 0.03114  | 4976.36 | 5388.86 | 5342.91 | 6631.21 | 6157.06 | 6049.96 | Up   |
| Hmgcr     | 5689.44 | 0.53572 | 0.1237  | 4.33077 | 1.49E-05 | 0.00038  | 4647.34 | 5185.66 | 4102.21 | 6593.48 | 7182.21 | 6425.72 | Up   |
| Gcnt4     | 67.9465 | -1.0812 | 0.46018 | -2.3494 | 0.0188   | 0.09807  | 105.755 | 42.4165 | 128.651 | 33.6506 | 50.4846 | 46.7217 | Down |
| Hexb      | 2874.24 | 0.68054 | 0.13514 | 5.03591 | 4.76E-07 | 2.14E-05 | 2223.79 | 2346.72 | 2055.49 | 3048.95 | 3607.07 | 3963.39 | Up   |
| Gm5086    | 46.0536 | 0.72903 | 0.37066 | 1.96683 | 0.0492   | 0.18905  | 30.3556 | 46.3622 | 27.2896 | 49.966  | 58.727  | 63.621  | Up   |
| Gm34388   | 8.22344 | -1.7773 | 0.83314 | -2.1333 | 0.0329   | 0.14419  | 8.81291 | 12.8236 | 16.5687 | 5.09857 | 2.0606  | 3.97631 | Down |
| Arhgef28  | 4596.49 | -0.4281 | 0.15658 | -2.7338 | 0.00626  | 0.0441   | 5910.53 | 4383.69 | 5526.14 | 4349.08 | 3440.17 | 3969.36 | Down |
| Gm21976   | 111.438 | -3.0518 | 0.73187 | -4.1698 | 3.05E-05 | 0.0007   | 397.56  | 24.6607 | 174.458 | 28.552  | 18.5454 | 24.852  | Down |
| A930014C  | 15.2455 | 1.69649 | 0.62071 | 2.73313 | 0.00627  | 0.04413  | 3.91685 | 9.8643  | 7.79702 | 24.4732 | 19.5757 | 25.846  | Up   |
| Map1b     | 4946.63 | -0.4897 | 0.2459  | -1.9917 | 0.04641  | 0.18182  | 6185.69 | 4189.37 | 6959.81 | 4600.95 | 2886.9  | 4857.07 | Down |
| BC001981  | 6.23263 | -2.6624 | 1.24133 | -2.1448 | 0.03197  | NA       | 16.6466 | 2.95929 | 12.6702 | 3.05914 | 2.0606  | 0       | Down |
| Smn1      | 1051.87 | -0.2147 | 0.09854 | -2.1787 | 0.02936  | 0.13306  | 1087.91 | 1135.38 | 1166.63 | 985.045 | 983.935 | 952.327 | Down |
| Naip2     | 1640.43 | 0.883   | 0.09745 | 9.06133 | 1.29E-19 | 6.69E-17 | 1217.16 | 1125.52 | 1117.9  | 2045.55 | 2186.29 | 2150.19 | Up   |
| Naip5     | 1643.59 | 0.72673 | 0.17924 | 4.05462 | 5.02E-05 | 0.00105  | 1251.43 | 1075.21 | 1387.87 | 2308.63 | 1618.6  | 2219.78 | Up   |
| Naip6     | 447.309 | 0.76526 | 0.19183 | 3.98919 | 6.63E-05 | 0.00132  | 255.575 | 393.585 | 345.018 | 586.336 | 534.725 | 568.613 | Up   |
| Naip1     | 23.3866 | 2.16879 | 0.65243 | 3.32415 | 0.00089  | 0.00997  | 2.93764 | 15.7829 | 6.82239 | 29.5717 | 48.424  | 36.7809 | Up   |
| Rnf180    | 553.265 | 0.88264 | 0.15498 | 5.6953  | 1.23E-08 | 8.83E-07 | 430.854 | 371.884 | 364.511 | 691.367 | 810.845 | 650.127 | Up   |
| Gm30411   | 10.9898 | -2.3001 | 0.76408 | -3.0102 | 0.00261  | 0.0231   | 20.5635 | 12.8236 | 21.4418 | 4.07886 | 2.0606  | 4.97039 | Down |
| Ipo11     | 471.567 | 0.26568 | 0.13409 | 1.98128 | 0.04756  | 0.18495  | 439.667 | 421.205 | 423.963 | 466.01  | 536.785 | 541.773 | Up   |
| Zswim6    | 1751.19 | 0.20986 | 0.10612 | 1.9776  | 0.04797  | 0.18606  | 1696.98 | 1628.6  | 1546.73 | 1806.93 | 1801.99 | 2025.93 | Up   |
| Ndufaf2   | 680.313 | -0.4661 | 0.1488  | -3.1324 | 0.00173  | 0.01679  | 819.601 | 696.419 | 851.824 | 605.711 | 506.907 | 601.418 | Down |
| Elov17    | 625.747 | 0.39888 | 0.16395 | 2.43298 | 0.01498  | 0.08338  | 610.05  | 447.839 | 561.385 | 694.426 | 773.754 | 667.027 | Up   |
| Pde4d     | 1793.91 | -0.5301 | 0.1064  | -4.982  | 6.29E-07 | 2.71E-05 | 2198.33 | 1999.49 | 2161.72 | 1381.71 | 1448.6  | 1573.63 | Down |
| Gap2      | 292.78  | 3.38899 | 0.41609 | 8.14487 | 3.80E-16 | 1.24E-13 | 42.1061 | 71.0229 | 39.9597 | 461.931 | 861.33  | 280.33  | Up   |
| Plk2      | 4541.03 | 0.57369 | 0.25168 | 2.27946 | 0.02264  | 0.11068  | 2499.93 | 5187.63 | 3262.08 | 5449.36 | 6074.64 | 4772.57 | Up   |
| Gm15287   | 3.20377 | 4.11446 | 1.67967 | 2.44956 | 0.0143   | NA       | 0.97921 | 0       | 0       | 8.15772 | 4.12119 | 5.96447 | Up   |
| Il6st     | 15996   | 0.27426 | 0.09841 | 2.7868  | 0.00532  | 0.03912  | 14449.3 | 15292.6 | 13698.4 | 16234.9 | 18346.5 | 17954.1 | Up   |
| Gzmk      | 25.5256 | -1.7363 | 0.7301  | -2.3782 | 0.0174   | 0.09324  | 15.6674 | 67.0772 | 35.0866 | 15.2957 | 4.12119 | 15.9053 | Down |
| BC067074  | 831.316 | -0.5282 | 0.20728 | -2.5481 | 0.01083  | 0.06552  | 799.038 | 1252.77 | 893.733 | 602.652 | 658.361 | 781.346 | Down |
| Ccl28     | 408.159 | 1.77682 | 0.35081 | 5.06491 | 4.09E-07 | 1.88E-05 | 283.972 | 102.589 | 166.661 | 529.232 | 555.331 | 811.168 | Up   |
| Dnase1l3  | 239.728 | 0.89807 | 0.36225 | 2.47913 | 0.01317  | 0.07567  | 243.824 | 96.6701 | 161.788 | 212.101 | 376.059 | 347.927 | Up   |
| Acox2     | 2001.17 | -1.036  | 0.34572 | -2.9967 | 0.00273  | 0.02389  | 2295.27 | 2047.83 | 3727.95 | 1805.92 | 670.724 | 1459.31 | Down |
| Fhit      | 371.719 | -0.9131 | 0.24223 | -3.7695 | 0.00016  | 0.00273  | 506.253 | 338.345 | 612.066 | 278.382 | 260.666 | 234.603 | Down |
| Synpr     | 419.19  | -1.5311 | 0.37703 | -4.0608 | 4.89E-05 | 0.00103  | 343.704 | 857.207 | 667.62  | 318.151 | 181.333 | 147.124 | Down |
| Sntn      | 3114.52 | -1.009  | 0.32084 | -3.145  | 0.00166  | 0.01624  | 5627.54 | 2449.3  | 4407.26 | 2009.86 | 1388.84 | 2804.3  | Down |
| Il3ra     | 1077.73 | 0.52151 | 0.1895  | 2.75199 | 0.00592  | 0.04235  | 1014.46 | 840.438 | 800.169 | 1014.62 | 1537.21 | 1259.5  | Up   |
| Slc4a7    | 1132.64 | 0.48293 | 0.19767 | 2.44309 | 0.01456  | 0.08178  | 1028.17 | 924.285 | 882.038 | 963.631 | 1515.57 | 1482.17 | Up   |
| Nek10     | 908.265 | -1.3236 | 0.34332 | -3.8554 | 0.00012  | 0.00209  | 1549.11 | 725.026 | 1619.83 |         |         |         |      |

|           |         |         |         |         |          |          |         |         |         |         |         |         |      |
|-----------|---------|---------|---------|---------|----------|----------|---------|---------|---------|---------|---------|---------|------|
| Usp54     | 249.273 | 0.5175  | 0.22553 | 2.29457 | 0.02176  | 0.10798  | 228.157 | 170.652 | 216.367 | 289.599 | 236.969 | 353.892 | Up   |
| Synpo2l   | 45.7033 | -1.9514 | 0.81877 | -2.3834 | 0.01715  | 0.09232  | 94.0044 | 11.8372 | 112.082 | 16.3154 | 6.18179 | 33.7987 | Down |
| Sec24c    | 420.296 | 0.6593  | 0.21387 | 3.08266 | 0.00205  | 0.01916  | 398.54  | 267.322 | 311.881 | 457.852 | 470.846 | 615.335 | Up   |
| Vcl       | 2890.46 | 0.48024 | 0.14938 | 3.21493 | 0.0013   | 0.0135   | 2743.75 | 2340.8  | 2156.85 | 2940.86 | 3370.11 | 3790.42 | Up   |
| Ap3m1     | 4220.22 | 0.25796 | 0.08403 | 3.07    | 0.00214  | 0.01988  | 3706.32 | 4002.93 | 3822.49 | 4513.26 | 4738.34 | 4537.97 | Up   |
| Dusp13    | 28.7965 | 0.99137 | 0.44681 | 2.21875 | 0.0265   | 0.12393  | 21.5427 | 15.7829 | 20.4672 | 40.7886 | 46.3634 | 27.8342 | Up   |
| Samd8     | 2297.37 | 0.22519 | 0.10284 | 2.18972 | 0.02854  | 0.1306   | 2098.45 | 2248.07 | 2008.71 | 2523.79 | 2585.02 | 2320.18 | Up   |
| Vdac2     | 14173.8 | 0.20433 | 0.09596 | 2.12939 | 0.03322  | 0.14535  | 13013.7 | 12890.7 | 13610.7 | 15611.8 | 16007.7 | 13908.2 | Up   |
| A430057N  | 28.4315 | 1.31453 | 0.56103 | 2.34307 | 0.01913  | 0.09924  | 8.81291 | 10.8507 | 29.2388 | 37.7295 | 41.2119 | 42.7454 | Up   |
| Zfp503    | 2600.18 | 0.51536 | 0.23264 | 2.21524 | 0.02674  | 0.12472  | 1687.18 | 2188.89 | 2545.73 | 3003.06 | 3930.59 | 2245.62 | Up   |
| Kcnma1    | 52.749  | -0.8715 | 0.39642 | -2.1984 | 0.02792  | 0.12855  | 70.5033 | 46.3622 | 87.7165 | 35.69   | 47.3937 | 28.8283 | Down |
| Dennd6a   | 513.395 | 0.36213 | 0.1764  | 2.05293 | 0.04008  | 0.16523  | 455.334 | 397.531 | 495.111 | 532.291 | 516.18  | 683.926 | Up   |
| Dnah12    | 2966.59 | -0.8344 | 0.27044 | -3.0853 | 0.00203  | 0.01902  | 4474.02 | 2393.08 | 4536.89 | 2184.23 | 1594.9  | 2616.41 | Down |
| Asb14     | 925.12  | -0.6437 | 0.26285 | -2.4488 | 0.01433  | 0.08084  | 1173.1  | 811.832 | 1399.56 | 804.555 | 502.786 | 858.884 | Down |
| Wnt5a     | 961.548 | -0.4501 | 0.13892 | -3.2401 | 0.00119  | 0.01268  | 1014.46 | 1048.57 | 1267.99 | 757.648 | 837.633 | 842.979 | Down |
| Cacna2d3  | 107.321 | -0.8534 | 0.23092 | -3.6958 | 0.00022  | 0.00343  | 145.903 | 126.263 | 142.296 | 71.38   | 85.5148 | 72.5677 | Down |
| Prkcd     | 6748.25 | 0.50901 | 0.1168  | 4.358   | 1.31E-05 | 0.00034  | 5323.98 | 6136.58 | 5249.34 | 8192.39 | 8372.21 | 7215.02 | Up   |
| Mustn1    | 1445.07 | 0.56732 | 0.17475 | 3.24637 | 0.00117  | 0.01247  | 1074.2  | 1420.46 | 998.993 | 1766.15 | 1893.69 | 1516.96 | Up   |
| Smim4     | 276.784 | -0.3963 | 0.1985  | -1.9967 | 0.04586  | 0.18031  | 385.81  | 279.16  | 278.743 | 225.357 | 242.12  | 249.514 | Down |
| Dnah1     | 1722.64 | -1.263  | 0.2633  | -4.797  | 1.61E-06 | 5.94E-05 | 2640.94 | 1650.3  | 3004.78 | 1073.76 | 729.451 | 1236.63 | Down |
| Capn7     | 416.24  | 0.65738 | 0.19324 | 3.40184 | 0.00067  | 0.00804  | 363.288 | 294.942 | 310.906 | 474.167 | 435.816 | 618.317 | Up   |
| Colq      | 785.491 | -1.0447 | 0.26856 | -3.8901 | 0.0001   | 0.00187  | 950.816 | 1074.22 | 1149.09 | 658.736 | 574.907 | 305.182 | Down |
| Oxnad1    | 652.358 | -0.3357 | 0.16538 | -2.0296 | 0.04239  | 0.17118  | 752.035 | 659.921 | 771.905 | 554.725 | 496.604 | 678.956 | Down |
| Ncoa4     | 1660.04 | 0.7328  | 0.15935 | 4.59865 | 4.25E-06 | 0.00014  | 1424.75 | 1165.96 | 1151.03 | 1881.37 | 2430.47 | 1906.64 | Up   |
| 1700024G  | 1085.38 | -1.4442 | 0.29599 | -4.8793 | 1.06E-06 | 4.20E-05 | 1799.79 | 1030.82 | 1931.71 | 624.066 | 384.301 | 741.583 | Down |
| Tmem273   | 370.003 | 1.10514 | 0.26165 | 4.22374 | 2.40E-05 | 0.00057  | 207.593 | 313.685 | 183.23  | 441.537 | 632.603 | 441.371 | Up   |
| Wdfy4     | 2121.78 | 0.7551  | 0.15615 | 4.83568 | 1.33E-06 | 5.10E-05 | 1493.3  | 1675.94 | 1567.2  | 2454.45 | 3216.59 | 2323.16 | Up   |
| Frmpd2    | 1919.48 | -0.7183 | 0.32958 | -2.1795 | 0.0293   | 0.13288  | 2823.07 | 1471.75 | 2868.33 | 1718.22 | 825.269 | 1810.22 | Down |
| Ptpn20    | 224.242 | -0.9588 | 0.4029  | -2.3796 | 0.01733  | 0.09301  | 327.057 | 164.734 | 396.673 | 121.346 | 103.03  | 232.614 | Down |
| Glud1     | 12686.4 | 0.21396 | 0.09654 | 2.21633 | 0.02667  | 0.12452  | 11228.6 | 12196.2 | 11817.4 | 13520.4 | 14619.9 | 12736.1 | Up   |
| Sncg      | 952.344 | -1.0229 | 0.21439 | -4.7712 | 1.83E-06 | 6.65E-05 | 1206.39 | 1008.13 | 1614.96 | 725.017 | 522.361 | 637.204 | Down |
| Mmrn2     | 1858.23 | 0.43266 | 0.14893 | 2.90519 | 0.00367  | 0.02987  | 1376.77 | 1782.48 | 1585.72 | 1926.24 | 2399.57 | 2078.62 | Up   |
| Ldb3      | 322.546 | -1.8255 | 0.88325 | -2.0667 | 0.03876  | 0.16172  | 763.786 | 84.8329 | 660.797 | 127.464 | 89.636  | 208.756 | Down |
| Ccser2    | 6349.51 | 0.30503 | 0.08887 | 3.43231 | 0.0006   | 0.00742  | 5386.65 | 6038.92 | 5616.78 | 6836.17 | 7104.94 | 7113.63 | Up   |
| Sh2d4b    | 125.284 | 0.54372 | 0.26912 | 2.02036 | 0.04335  | 0.17367  | 127.298 | 101.602 | 76.9956 | 156.016 | 127.757 | 162.035 | Up   |
| Prxl2a    | 3347.49 | -0.4391 | 0.1865  | -2.3546 | 0.01854  | 0.09728  | 4497.52 | 2978.03 | 4083.69 | 3065.26 | 2402.66 | 3057.79 | Down |
| Dydc2     | 248.474 | -1.0445 | 0.36142 | -2.8899 | 0.00385  | 0.03093  | 384.831 | 194.327 | 424.937 | 200.884 | 100.969 | 184.899 | Down |
| Dydc1     | 158.187 | -1.2801 | 0.4029  | -3.1771 | 0.00149  | 0.01492  | 256.554 | 132.182 | 283.617 | 104.011 | 50.4846 | 122.272 | Down |
| Sftpd     | 108973  | 0.8533  | 0.14244 | 5.99044 | 2.09E-09 | 1.74E-07 | 73464.5 | 92846.7 | 66650.9 | 140627  | 140268  | 139982  | Up   |
| Gm8113    | 114.04  | 0.69925 | 0.25229 | 2.77155 | 0.00558  | 0.04049  | 67.5657 | 101.602 | 91.615  | 144.8   | 150.424 | 128.236 | Up   |
| Gm32857   | 42.7431 | 1.72121 | 0.6074  | 2.83374 | 0.0046   | 0.03521  | 7.8337  | 14.7964 | 37.0358 | 94.8335 | 44.3028 | 57.6566 | Up   |
| Gm5930    | 25.1381 | 1.36816 | 0.67289 | 2.03326 | 0.04203  | 0.17024  | 3.91685 | 14.7964 | 23.3911 | 52.0055 | 29.8787 | 26.8401 | Up   |
| Gm8229    | 33.1988 | 1.77671 | 0.70852 | 2.50764 | 0.01215  | 0.07127  | 2.93764 | 11.8372 | 30.2134 | 67.3012 | 40.1816 | 46.7217 | Up   |
| Ero1l     | 2922.63 | 0.33006 | 0.09484 | 3.48027 | 0.0005   | 0.00645  | 2586.1  | 2690.98 | 2492.12 | 3330.39 | 3380.41 | 3055.8  | Up   |
| Gm15601   | 130.177 | 0.48483 | 0.21364 | 2.26943 | 0.02324  | 0.11292  | 99.8797 | 125.277 | 100.387 | 148.878 | 154.545 | 152.094 | Up   |
| Ddhd1     | 2827.66 | 0.85868 | 0.16001 | 5.36639 | 8.03E-08 | 4.65E-06 | 2104.33 | 2314.16 | 1612.03 | 3385.45 | 3929.56 | 3620.43 | Up   |
| Ubb-ps    | 823.978 | 0.70137 | 0.22458 | 3.12305 | 0.00179  | 0.01719  | 561.089 | 638.22  | 683.214 | 933.039 | 1356.9  | 771.405 | Up   |
| Bmp4      | 3378.24 | 0.48848 | 0.23279 | 2.09835 | 0.03587  | 0.15334  | 2192.46 | 3433.76 | 2808.88 | 3893.27 | 5016.52 | 2924.58 | Up   |
| Gch1      | 3705.12 | 0.56306 | 0.10882 | 5.17426 | 2.29E-07 | 1.13E-05 | 3052.21 | 3208.86 | 2712.39 | 4221.62 | 4650.77 | 4384.88 | Up   |
| Lgals3    | 14063.1 | 0.37447 | 0.1541  | 2.43002 | 0.0151   | 0.08377  | 12824.7 | 11506.7 | 12412.9 | 16301.2 | 18520.6 | 12812.7 | Up   |
| Dlgap5    | 112.385 | 0.47437 | 0.23595 | 2.01051 | 0.04438  | 0.17627  | 101.838 | 91.738  | 88.6911 | 113.188 | 127.757 | 151.1   | Up   |
| Rpl19-ps3 | 21.6293 | -1.3982 | 0.67129 | -2.0828 | 0.03727  | 0.15722  | 50.9191 | 19.7286 | 23.3911 | 10.1971 | 19.5757 | 5.96447 | Down |
| Tep1      | 2491.76 | 0.54786 | 0.09071 | 5.04765 | 4.47E-07 | 2.03E-05 | 2154.46 | 2081.37 | 2072.06 | 2755.27 | 3040.41 | 2855.99 | Up   |
| Rnase4    | 46958.7 | 0.61703 | 0.14121 | 4.36953 | 1.25E-05 | 0.00033  | 36338.6 | 41100.6 | 33762.1 | 62050.7 | 60311.6 | 48189   | Up   |
| Rnase6    | 551.49  | 0.42147 | 0.13115 | 3.21357 | 0.00131  | 0.01355  | 432.812 | 508.998 | 472.694 | 604.691 | 662.482 | 627.264 | Up   |
| Ear6      | 170.065 | 3.73121 | 0.4239  | 8.802   | 1.34E-18 | 6.05E-16 | 23.5011 | 12.8236 | 35.0866 | 304.895 | 450.24  | 193.845 | Up   |
| Slc39a2   | 989.793 | 2.51936 | 0.27292 | 9.2311  | 2.68E-20 | 1.63E-17 | 363.288 | 258.445 | 260.225 | 1662.14 | 2287.26 | 1107.4  | Up   |
| Gm49256   | 11.8694 | -1.748  | 0.8486  | -2.0598 | 0.03942  | 0.16343  | 10.7713 | 17.7557 | 26.3149 | 7.138   | 8.24239 | 0.99408 | Down |
| Rpgrip1   | 407.781 | 0.62748 | 0.13825 | 4.53869 | 5.66E-06 | 0.00017  | 308.452 | 328.481 | 324.551 | 459.891 | 492.483 | 532.826 | Up   |
| Supt16    | 1031.63 | 0.37892 | 0.1724  | 2.19788 | 0.02796  | 0.12865  | 900.876 | 780.266 | 1009.71 | 1007.48 | 1111.69 | 1379.78 | Up   |
| Gm30275   | 63.673  | 1.01568 | 0.44485 | 2.28319 | 0.02242  | 0.11011  | 30.3556 | 49.3215 | 46.7821 | 46.9069 | 82.4239 | 126.248 | Up   |
| Gm43305   | 32.5772 | 3.25248 | 1.00812 | 3.22627 | 0.00125  | 0.01314  | 5.87528 | 0       | 12.6702 | 19.3746 | 126.727 | 30.8164 | Up   |
| Rem2      | 166.783 | -0.8717 | 0.23875 | -3.651  | 0.00026  | 0.00394  | 214.448 | 227.865 | 204.672 | 147.859 | 115.393 | 90.4611 | Down |
| Prmt5     | 2042.29 | -0.2046 | 0.08776 | -2.3318 | 0.01971  | 0.10116  | 2156.23 | 2128.72 | 2275.75 | 1874.24 | 1881.32 | 1937.46 | Down |
| Acin1     | 1168.45 | 0.40424 | 0.15605 | 2.59044 | 0.00959  | 0.05987  | 1128.05 | 868.058 | 1021.41 | 1253.23 | 1223.99 | 1515.97 | Up   |
| Slc7a8    | 352.088 | 0.87449 | 0.25914 | 3.37459 | 0.00074  | 0.00865  | 227.177 | 316.644 | 201.748 | 402.787 | 591.391 | 372.779 | Up   |
| Slc22a17  | 1275.92 | -0.307  | 0.10584 | -2.9005 | 0.00373  | 0.03016  | 1352.29 | 1472.74 | 1408.34 | 1140.04 | 1207.51 | 1074.6  | Down |
| Efs       | 239.022 | -0.3548 | 0.18003 | -1.971  | 0.04872  | 0.18768  | 295.722 | 269.295 | 239.758 | 231.475 | 205.029 | 192.851 | Down |
| Myh7      | 67.5339 | -0.9667 | 0.49259 | -1.9626 | 0.0497   | 0.19018  | 103.797 | 48.3351 | 115.981 | 33.6506 | 29.8787 | 73.5618 | Down |
| Zfx2os    | 18.765  | -1.4343 | 0.62745 | -2.2859 | 0.02226  | 0.10965  | 31.3348 | 13.81   | 37.0358 | 13.2563 | 7.21209 | 9.94079 | Down |
| Ap1g2     | 1486.29 | 0.29913 | 0.11927 | 2.50807 | 0.01214  | 0.07121  | 1373.84 | 1353.38 | 1270.91 | 1736.57 | 1724.72 | 1458.31 | Up   |
| Rec8      | 1065.33 | -1.2624 | 0.2552  | -4.9467 | 7.55E-07 | 3.15E-05 | 1335.65 | 1816.02 | 1359.61 | 558.804 | 870.602 | 451.312 | Down |
| Ipo4      | 1851.27 | -0.2894 | 0.11356 | -2.548  | 0.01084  | 0.06552  | 2082.79 | 2101.1  | 1924.89 | 1777.36 | 1716.48 | 1505.03 | Down |
| Cideb     | 169.148 | 1.09594 | 0.1985  | 5.52113 | 3.37E-08 | 2.11E-06 | 104.776 | 110.48  | 108.184 | 210.061 | 261.696 | 219.691 | Up   |
| Ltb4r2    | 16.6777 | 1.69972 | 0.66752 | 2.54632 | 0.01089  | 0.06574  | 7.8337  | 9.8643  | 5.84776 | 30.5914 | 33.9998 | 11.9289 | Up   |
| Ripk3     | 698.69  | 0.89411 | 0.14381 | 6.21711 | 5.06E-10 | 4.70E-08 | 518.004 | 506.038 | 442.481 | 862.679 | 1018.97 | 843.973 | Up   |
| Nfatc4    | 638.548 | 0.35207 | 0.17923 | 1.96434 |          |          |         |         |         |         |         |         |      |

|          |         |         |         |         |          |          |         |         |         |         |         |         |      |
|----------|---------|---------|---------|---------|----------|----------|---------|---------|---------|---------|---------|---------|------|
| Mrpl57   | 1035.11 | -0.3452 | 0.12729 | -2.7117 | 0.00669  | 0.04609  | 1220.1  | 1099.87 | 1154.93 | 992.183 | 932.42  | 811.168 | Down |
| 3110083C | 100.69  | -0.6037 | 0.29411 | -2.0525 | 0.04012  | 0.1653   | 143.944 | 100.616 | 119.879 | 75.4589 | 62.8482 | 101.396 | Down |
| Rcbb1    | 2749.33 | 0.24002 | 0.09187 | 2.6126  | 0.00899  | 0.05722  | 2499.93 | 2385.19 | 2678.28 | 2951.05 | 3002.29 | 2979.25 | Up   |
| Atp8a2   | 83.0091 | -0.5511 | 0.26041 | -2.1162 | 0.03433  | 0.14852  | 112.609 | 93.7108 | 89.6657 | 72.3998 | 69.03   | 60.6388 | Down |
| Gm29266  | 177.986 | -1.1651 | 0.21824 | -5.3388 | 9.36E-08 | 5.25E-06 | 235.99  | 221.947 | 280.693 | 120.326 | 90.6663 | 118.295 | Down |
| Spata13  | 1978.5  | 0.23746 | 0.11761 | 2.01905 | 0.04348  | 0.1741   | 1818.4  | 1644.38 | 1985.32 | 2007.82 | 2217.2  | 2197.91 | Up   |
| Mipep    | 1727.23 | -0.397  | 0.17863 | -2.2222 | 0.02627  | 0.12325  | 2202.25 | 1538.83 | 2149.05 | 1541.81 | 1297.15 | 1634.27 | Down |
| Ebpl     | 737.198 | -0.3468 | 0.17054 | -2.0334 | 0.04201  | 0.17024  | 882.271 | 670.772 | 922.972 | 711.761 | 643.937 | 591.477 | Down |
| Dleu2    | 2110.54 | -0.3573 | 0.15509 | -2.3038 | 0.02123  | 0.10646  | 2610.58 | 1988.64 | 2512.59 | 1812.03 | 1659.81 | 2079.61 | Down |
| Ctsb     | 46787.8 | 0.57074 | 0.09154 | 6.23455 | 4.53E-10 | 4.26E-08 | 37627.2 | 39789.6 | 35538.8 | 55006.5 | 58885.7 | 53879.1 | Up   |
| Fdft1    | 5771.06 | 0.37521 | 0.1115  | 3.36518 | 0.00076  | 0.0089   | 5041.97 | 5253.72 | 4778.6  | 6744.39 | 6984.39 | 5823.31 | Up   |
| Neil2    | 144.324 | 0.45331 | 0.21339 | 2.12432 | 0.03364  | 0.14653  | 113.589 | 125.277 | 126.702 | 171.312 | 142.181 | 186.887 | Up   |
| Sox7     | 4042.59 | 0.53373 | 0.16581 | 3.21889 | 0.00129  | 0.01339  | 2576.31 | 3437.71 | 3895.59 | 4953.77 | 4810.46 | 4581.71 | Up   |
| Fzd3     | 1269.22 | -0.3077 | 0.14958 | -2.0571 | 0.03967  | 0.16424  | 1486.44 | 1376.07 | 1349.86 | 1049.29 | 1008.66 | 1344.99 | Down |
| Fbxo16   | 604.72  | -0.8368 | 0.22246 | -3.7617 | 0.00017  | 0.0028   | 903.813 | 593.831 | 828.433 | 508.838 | 343.089 | 450.318 | Down |
| Scara5   | 391.811 | -1.3212 | 0.21328 | -6.1947 | 5.84E-10 | 5.39E-08 | 685.449 | 440.934 | 552.614 | 236.574 | 194.726 | 240.567 | Down |
| Scara3   | 368.024 | -1.2806 | 0.29065 | -4.406  | 1.05E-05 | 0.00029  | 732.451 | 451.785 | 380.105 | 232.495 | 162.787 | 248.52  | Down |
| Ptk2b    | 2006.71 | 0.82765 | 0.18456 | 4.48444 | 7.31E-06 | 0.00022  | 1287.66 | 1700.6  | 1350.83 | 2618.63 | 3020.84 | 2061.72 | Up   |
| Adra1a   | 865.282 | -0.7225 | 0.30767 | -2.3483 | 0.01886  | 0.09825  | 969.421 | 1549.68 | 713.427 | 743.372 | 764.481 | 451.312 | Down |
| Dock5    | 2091.13 | 0.41081 | 0.11034 | 3.72303 | 0.0002   | 0.00315  | 1853.65 | 1656.22 | 1876.16 | 2415.7  | 2525.26 | 2219.78 | Up   |
| Adamdec1 | 1432.68 | -0.6367 | 0.26606 | -2.3933 | 0.0167   | 0.09047  | 1761.6  | 1157.08 | 2312.79 | 1290.96 | 848.966 | 1224.7  | Down |
| Stc1     | 162.784 | 0.39149 | 0.18547 | 2.11078 | 0.03479  | 0.14987  | 134.152 | 148.951 | 139.372 | 193.746 | 187.514 | 172.97  | Up   |
| Sorbs3   | 11982.4 | -0.3468 | 0.13869 | -2.5007 | 0.01239  | 0.07223  | 15148.4 | 11187.1 | 13911.8 | 11056.8 | 10007.3 | 10583   | Down |
| Gm49417  | 323.35  | -0.5218 | 0.16635 | -3.1366 | 0.00171  | 0.01663  | 413.228 | 363.993 | 366.46  | 278.382 | 229.757 | 288.283 | Down |
| Fndc3a   | 5321.52 | 0.37278 | 0.09549 | 3.904   | 9.46E-05 | 0.00178  | 4901.94 | 4579.01 | 4432.6  | 5807.28 | 5826.34 | 6381.98 | Up   |
| Rb1      | 396.73  | 0.49027 | 0.1738  | 2.82083 | 0.00479  | 0.03613  | 396.581 | 306.78  | 286.54  | 460.911 | 455.392 | 474.175 | Up   |
| Nudt15   | 126.661 | 0.47029 | 0.20215 | 2.3264  | 0.02     | 0.10219  | 103.797 | 113.439 | 101.361 | 146.839 | 149.393 | 145.135 | Up   |
| Lcp1     | 17510.7 | 0.98598 | 0.14103 | 6.99155 | 2.72E-12 | 3.94E-10 | 11061.2 | 12958.7 | 11228.7 | 20251.5 | 26873.3 | 22690.8 | Up   |
| Gm4285   | 134.424 | -0.4923 | 0.24353 | -2.0216 | 0.04322  | 0.1734   | 154.716 | 166.707 | 150.093 | 89.7349 | 106.121 | 139.171 | Down |
| Tsc22d1  | 20811.7 | -0.3866 | 0.15623 | -2.4746 | 0.01334  | 0.07636  | 23707.7 | 19295.5 | 27747.6 | 19732.5 | 17237.9 | 17148.8 | Down |
| Serp2    | 60.3939 | -0.7002 | 0.32431 | -2.1591 | 0.03085  | 0.13755  | 70.5033 | 63.1315 | 90.6403 | 38.7492 | 54.6058 | 44.7335 | Down |
| Lacc1    | 1026.11 | 0.51704 | 0.14182 | 3.64585 | 0.00027  | 0.00399  | 779.453 | 882.855 | 870.342 | 1052.35 | 1215.75 | 1355.92 | Up   |
| Epst1    | 2129.32 | 0.41666 | 0.13724 | 3.03607 | 0.0024   | 0.02168  | 1784.13 | 1609.85 | 2077.91 | 2523.79 | 2225.44 | 2554.78 | Up   |
| Gm19301  | 736.444 | -0.9578 | 0.2959  | -3.2368 | 0.00121  | 0.01279  | 1121.2  | 693.46  | 1102.3  | 627.125 | 304.968 | 569.607 | Down |
| Tnfrsf11 | 29.554  | 0.93996 | 0.4108  | 2.2881  | 0.02213  | 0.10921  | 17.6258 | 21.7015 | 21.4418 | 42.828  | 32.9696 | 40.7572 | Up   |
| Olfm4    | 241.69  | 3.66797 | 0.4594  | 7.98425 | 1.41E-15 | 4.31E-13 | 52.8775 | 20.715  | 32.1627 | 701.564 | 216.363 | 426.46  | Up   |
| Diaph3   | 536.72  | -0.4762 | 0.23915 | -1.9913 | 0.04644  | 0.18192  | 438.687 | 830.574 | 604.269 | 431.339 | 478.058 | 437.395 | Down |
| Rps3a2   | 6698.47 | -0.7562 | 0.22633 | -3.3412 | 0.00083  | 0.00952  | 9536.55 | 7692.18 | 8016.31 | 3944.26 | 4101.62 | 6899.9  | Down |
| Gm33203  | 3.19448 | 4.11063 | 1.71247 | 2.40042 | 0.01638  | NA       | 0.97921 | 0       | 0       | 3.05914 | 6.18179 | 8.94671 | Up   |
| Pcdh20   | 40.4978 | -1.3983 | 0.49513 | -2.8242 | 0.00474  | 0.03591  | 83.2331 | 29.5929 | 63.3508 | 20.3943 | 19.5757 | 26.8401 | Down |
| Pibf1    | 1262.49 | -0.3994 | 0.14375 | -2.7787 | 0.00546  | 0.03983  | 1527.57 | 1255.72 | 1525.29 | 1046.23 | 999.389 | 1220.73 | Down |
| Gm41230  | 90.4795 | -2.5297 | 0.29637 | -8.5356 | 1.39E-17 | 5.73E-15 | 169.404 | 161.774 | 131.575 | 61.6112 | 22.6666 | 25.846  | Down |
| Gm49225  | 26.7937 | -1.5746 | 0.56927 | -2.766  | 0.00567  | 0.04104  | 45.0438 | 25.6472 | 49.706  | 15.2957 | 6.18179 | 18.8875 | Down |
| Lmo7     | 26301.5 | 0.30239 | 0.12557 | 2.40823 | 0.01603  | 0.08767  | 21697.4 | 21652.1 | 27315.9 | 29820.5 | 29172.9 | 28150.3 | Up   |
| Kctd12   | 5845.64 | 0.26999 | 0.09478 | 2.8486  | 0.00439  | 0.03395  | 5002.8  | 5675.92 | 5222.05 | 6149.9  | 6610.39 | 6412.8  | Up   |
| Mycbp2   | 4012.22 | 0.23115 | 0.08087 | 2.8582  | 0.00426  | 0.03325  | 3636.8  | 3766.19 | 3671.42 | 4209.38 | 4943.13 | 4296.41 | Up   |
| Gm34907  | 350.114 | 0.78513 | 0.21299 | 3.6862  | 0.00023  | 0.00354  | 294.743 | 243.648 | 232.936 | 382.393 | 554.301 | 392.661 | Up   |
| Slain1   | 617.751 | -0.7399 | 0.12172 | -6.0786 | 1.21E-09 | 1.06E-07 | 726.576 | 825.642 | 766.057 | 459.891 | 477.028 | 451.312 | Down |
| Ednrb    | 3095.05 | -0.5456 | 0.17048 | -3.2006 | 0.00137  | 0.01402  | 3466.41 | 4537.58 | 3016.47 | 2333.11 | 2624.17 | 2592.56 | Down |
| D130009L | 372.033 | -0.4673 | 0.18264 | -2.5584 | 0.01052  | 0.06427  | 386.789 | 498.147 | 410.318 | 359.959 | 294.665 | 282.318 | Down |
| Gm6201   | 43.186  | -0.9907 | 0.46117 | -2.1483 | 0.03169  | 0.14018  | 60.7112 | 53.2672 | 58.4776 | 23.4534 | 16.4848 | 46.7217 | Down |
| 9330188P | 76.1229 | -2.4614 | 0.54566 | -4.5109 | 6.46E-06 | 0.00019  | 148.84  | 151.91  | 85.7672 | 7.138   | 41.2119 | 21.8697 | Down |
| Slitrk6  | 251.024 | -1.2056 | 0.41734 | -2.8889 | 0.00387  | 0.03099  | 550.318 | 353.142 | 147.169 | 124.405 | 172.06  | 159.053 | Down |
| Sox21    | 276.576 | -1.7572 | 0.52543 | -3.3444 | 0.00082  | 0.00943  | 682.511 | 141.059 | 457.1   | 153.977 | 60.7876 | 164.023 | Down |
| Cldn10   | 1749.01 | -0.8989 | 0.29889 | -3.0073 | 0.00264  | 0.02328  | 2343.26 | 1900.85 | 2586.66 | 1652.96 | 659.391 | 1350.95 | Down |
| Dzip1    | 922.792 | -0.9894 | 0.28231 | -3.5048 | 0.00046  | 0.00601  | 1299.42 | 884.827 | 1498    | 643.44  | 403.877 | 807.192 | Down |
| Hs6st3   | 102.476 | -0.8524 | 0.27798 | -3.0665 | 0.00217  | 0.02005  | 154.716 | 100.616 | 140.346 | 83.6166 | 66.9694 | 68.5914 | Down |
| Gm4681   | 14.5876 | -2.2552 | 0.75205 | -2.9987 | 0.00271  | 0.02379  | 27.418  | 11.8372 | 33.1373 | 3.05914 | 4.12119 | 7.95263 | Down |
| Gm49008  | 1.96018 | -4.3928 | 2.01383 | -2.1813 | 0.02916  | NA       | 3.91685 | 3.94572 | 3.89851 | 0       | 0       | 0       | Down |
| Stk24    | 3687.96 | 0.26649 | 0.13027 | 2.04572 | 0.04078  | 0.16679  | 3401.79 | 3668.53 | 2974.56 | 3831.07 | 4467.37 | 3784.46 | Up   |
| Slc15a1  | 216.676 | 0.4454  | 0.19927 | 2.23513 | 0.02541  | 0.12018  | 179.196 | 155.856 | 215.393 | 227.396 | 263.756 | 258.46  | Up   |
| 1810041H | 46.0222 | -1.1909 | 0.33946 | -3.5083 | 0.00045  | 0.00595  | 57.7736 | 63.1315 | 71.1478 | 26.5126 | 25.7575 | 31.8105 | Down |
| Timm8a2  | 4.57555 | -4.5995 | 1.58423 | -2.9033 | 0.00369  | NA       | 12.7298 | 4.93215 | 8.77165 | 1.01971 | 0       | 0       | Down |
| Gm5089   | 6.69468 | -3.1608 | 1.29857 | -2.4341 | 0.01493  | NA       | 6.85449 | 3.94572 | 25.3403 | 2.03943 | 0       | 1.98816 | Down |
| Zic5     | 62.3413 | -1.9073 | 0.5331  | -3.5778 | 0.00035  | 0.00486  | 93.0252 | 50.3079 | 152.042 | 16.3154 | 20.606  | 41.7513 | Down |
| Pcca     | 1547.63 | -0.3002 | 0.09602 | -3.1261 | 0.00177  | 0.01705  | 1755.73 | 1730.2  | 1638.35 | 1394.97 | 1329.08 | 1437.44 | Down |
| Ggact    | 813.832 | -0.2095 | 0.10679 | -1.962  | 0.04977  | 0.19041  | 850.936 | 855.234 | 912.251 | 781.102 | 743.875 | 739.594 | Down |
| C6       | 12157.3 | 0.37864 | 0.1761  | 2.15019 | 0.03154  | 0.13968  | 9617.83 | 13166.9 | 8928.56 | 12011.2 | 14520   | 14699.4 | Up   |
| Ptger4   | 1029.93 | 0.46251 | 0.15306 | 3.02175 | 0.00251  | 0.0225   | 762.807 | 862.139 | 973.653 | 1222.64 | 1312.6  | 1045.77 | Up   |
| 5430437J | 141.054 | 1.21609 | 0.2774  | 4.38393 | 1.17E-05 | 0.00031  | 60.7112 | 82.8601 | 111.108 | 193.746 | 177.211 | 220.685 | Up   |
| Dab2     | 6306.67 | 1.0056  | 0.1392  | 7.22394 | 5.05E-13 | 8.85E-11 | 4212.57 | 4807.86 | 3560.31 | 8181.17 | 9016.14 | 8061.98 | Up   |
| Osmr     | 5640.6  | 0.42655 | 0.1806  | 2.36183 | 0.01819  | 0.09611  | 5032.17 | 5389.85 | 4016.44 | 5656.36 | 5816.03 | 7932.75 | Up   |
| Cplane1  | 1780.27 | -0.3039 | 0.13483 | -2.2541 | 0.02419  | 0.11619  | 2037.74 | 1727.24 | 2136.38 | 1501.02 | 1520.72 | 1758.52 | Down |
| Spzf2    | 2968.81 | -0.7532 | 0.26477 | -2.8448 | 0.00444  | 0.03423  | 4380.02 | 2534.14 | 4265.94 | 2367.78 | 1537.21 | 2727.75 | Down |
| 4930556N | 1440.26 | -0.4992 | 0.13378 | -3.7313 | 0.00019  | 0.00307  | 1685.23 | 1853.5  | 1522.37 | 1103.33 | 1157.03 | 1320.14 | Down |
| Gm19276  | 8.89774 | -2.2798 | 1.05578 | -2.1593 | 0.03082  | 0.13751  | 6.85449 | 32.5522 | 4.87314 | 2.03943 | 3.0909  | 3.97631 | Down |
| Npr3     | 4108.31 | -1.2571 | 0.28063 | -4.4794 | 7.48E-06 | 0.00022  | 8530.9  | 3761.26 | 5086.58 | 1992.52 | 2828.17 | 2450    |      |

|           |         |         |           |         |          |          |         |         |         |         |         |         |      |
|-----------|---------|---------|-----------|---------|----------|----------|---------|---------|---------|---------|---------|---------|------|
| Dap       | 6410.98 | 0.45478 | 0.14085   | 3.22871 | 0.00124  | 0.01308  | 5017.49 | 5750.88 | 5457.91 | 7523.46 | 8449.48 | 6266.67 | Up   |
| Ropn1l    | 292.029 | -0.7458 | 0.24309   | -3.0681 | 0.00215  | 0.01996  | 319.223 | 301.847 | 476.593 | 238.613 | 180.302 | 235.597 | Down |
| Cmb1      | 2203.29 | -0.7403 | 0.27989   | -2.645  | 0.00817  | 0.05331  | 3311.7  | 1707.51 | 3250.38 | 1891.57 | 1181.75 | 1876.82 | Down |
| Gm32618   | 190.265 | -0.4022 | 0.17909   | -2.2456 | 0.02473  | 0.11779  | 222.281 | 223.92  | 203.697 | 149.898 | 164.848 | 176.946 | Down |
| Tspsyl5   | 215.808 | -0.8293 | 0.29607   | -2.801  | 0.0051   | 0.03792  | 297.681 | 224.906 | 306.033 | 182.529 | 95.8178 | 187.881 | Down |
| Erich5    | 31.0054 | -2.0883 | 0.66992   | -3.1173 | 0.00183  | 0.01743  | 77.3578 | 14.7964 | 58.4776 | 11.2169 | 9.27269 | 14.9112 | Down |
| Rida      | 1144.71 | -0.3572 | 0.10716   | -3.3331 | 0.00086  | 0.00974  | 1255.35 | 1326.75 | 1274.81 | 1017.68 | 1061.21 | 932.446 | Down |
| Nipal2    | 3437    | -0.2208 | 0.0962    | -2.2948 | 0.02175  | 0.10795  | 3778.78 | 3608.36 | 3711.38 | 3204.96 | 2945.62 | 3372.91 | Down |
| Vps13b    | 1275.53 | 0.30222 | 0.11852   | 2.54988 | 0.01078  | 0.06532  | 1208.35 | 1125.52 | 1093.53 | 1365.4  | 1312.6  | 1547.78 | Up   |
| Rgs22     | 1596.01 | -0.7455 | 0.33401   | -2.232  | 0.02562  | 0.12092  | 2429.43 | 1129.46 | 2439.49 | 1298.1  | 739.754 | 1539.83 | Down |
| Spag1     | 954.52  | -0.5254 | 0.24708   | -2.1267 | 0.03345  | 0.14604  | 1271.02 | 841.424 | 1267.02 | 753.569 | 582.119 | 1011.97 | Down |
| Pabpc1    | 20686.8 | 0.21673 | 0.10087   | 2.14871 | 0.03166  | 0.1401   | 18319.1 | 20607.5 | 18480.9 | 22833.5 | 23195.1 | 20684.8 | Up   |
| Gm49282   | 4.59826 | -3.6508 | 1.66361   | -2.1945 | 0.0282   | NA       | 1.95843 | 16.7693 | 6.82239 | 2.03943 | 0       | 0       | Down |
| Gm10384   | 45.8473 | 1.05959 | 0.38347   | 2.76316 | 0.00572  | 0.0413   | 39.1685 | 24.6607 | 25.3403 | 75.4589 | 59.7573 | 50.698  | Up   |
| Gm16136   | 779.346 | -0.4214 | 0.14962   | -2.8163 | 0.00486  | 0.03653  | 961.587 | 743.768 | 971.703 | 670.972 | 649.088 | 678.956 | Down |
| Ubr5      | 6319.55 | 0.2081  | 0.09078   | 2.2923  | 0.02189  | 0.10849  | 5863.53 | 5841.64 | 5888.7  | 6423.18 | 6618.64 | 7281.63 | Up   |
| 2310043C  | 76.1668 | -0.9626 | 0.30854   | -3.12   | 0.00181  | 0.0173   | 92.046  | 123.304 | 86.7418 | 42.828  | 49.4543 | 62.6269 | Down |
| 11000011l | 51.2551 | -1.9857 | 0.50958   | -3.8968 | 9.75E-05 | 0.00183  | 64.628  | 47.3486 | 133.524 | 26.5126 | 20.606  | 14.9112 | Down |
| Atp6v1c1  | 4475.06 | 0.27089 | 0.11784   | 2.29884 | 0.02151  | 0.10714  | 3997.15 | 3978.27 | 4192.85 | 4779.4  | 5504.88 | 4397.8  | Down |
| Cthrc1    | 342.699 | -0.8731 | 0.15935   | -5.4795 | 4.27E-08 | 2.60E-06 | 493.523 | 435.015 | 401.546 | 226.377 | 246.241 | 253.49  | Up   |
| Gm9522    | 49.7046 | -1.4824 | 0.50074   | -2.9605 | 0.00307  | 0.02617  | 62.6696 | 77.9279 | 78.9448 | 27.5323 | 41.2119 | 9.94079 | Down |
| Rims2     | 417.658 | -1.1214 | 0.27212   | -4.121  | 3.77E-05 | 0.00083  | 592.424 | 530.699 | 593.548 | 213.12  | 384.301 | 191.857 | Down |
| Lrp12     | 1551.29 | 1.47529 | 0.2258    | 6.53358 | 6.42E-11 | 7.45E-09 | 925.356 | 872.99  | 663.721 | 2170.97 | 2955.93 | 1718.76 | Up   |
| AU022793  | 181.387 | 1.26004 | 0.29979   | 4.20313 | 2.63E-05 | 0.00062  | 143.944 | 96.6701 | 79.9194 | 228.416 | 327.635 | 211.739 | Up   |
| Gm49254   | 5.40199 | 2.86195 | 1.4051    | 2.03683 | 0.04167  | NA       | 3.91685 | 0       | 0       | 6.11829 | 14.4242 | 7.95263 | Up   |
| Gm33251   | 6.60209 | 4.26192 | 1.30966   | 3.25421 | 0.00114  | NA       | 0.97921 | 0.98643 | 0       | 14.276  | 14.4242 | 8.94671 | Up   |
| Gm49271   | 2.03441 | 4.49593 | 2.13984   | 2.10106 | 0.03564  | NA       | 0       | 0       | 0       | 8.15772 | 2.0606  | 1.98816 | Up   |
| A930017N  | 72.1559 | -1.5701 | 0.4958    | -3.1668 | 0.00154  | 0.01533  | 149.82  | 51.2943 | 122.803 | 35.69   | 21.6363 | 51.6921 | Down |
| Aard      | 479.971 | -0.7878 | 0.13107   | -6.01   | 1.86E-09 | 1.57E-07 | 617.883 | 583.966 | 621.812 | 350.782 | 327.635 | 377.75  | Down |
| Ext1      | 3277.47 | 0.3396  | 0.13831   | 2.4554  | 0.01407  | 0.07957  | 2752.57 | 3357.81 | 2570.09 | 3639.36 | 3923.38 | 3421.62 | Up   |
| Samd12    | 2058.19 | 0.49649 | 0.13106   | 3.78825 | 0.00015  | 0.00258  | 1659.77 | 1862.38 | 1600.34 | 2142.42 | 2672.59 | 2411.63 | Up   |
| Tnfrsf11b | 274.199 | 0.46022 | 0.22678   | 2.02932 | 0.04243  | 0.17118  | 244.803 | 272.255 | 175.433 | 361.999 | 317.332 | 273.372 | Up   |
| Enpp2     | 3592.72 | -0.4051 | 0.11402   | -3.5529 | 0.00038  | 0.00522  | 3922.73 | 3926.98 | 4431.63 | 2937.8  | 3390.71 | 2946.45 | Down |
| Derl1     | 8845.71 | 0.22178 | 0.11156   | 1.98802 | 0.04681  | 0.18301  | 8137.26 | 8722.01 | 7642.05 | 9593.48 | 10307.1 | 8672.34 | Up   |
| Atad2     | 1177.41 | 0.59054 | 0.13866   | 4.25901 | 2.05E-05 | 0.0005   | 895     | 839.452 | 1084.76 | 1419.44 | 1346.6  | 1479.19 | Up   |
| Wdyh1v1   | 2489.66 | -0.5598 | 0.16887   | -3.3148 | 0.00092  | 0.01025  | 3268.61 | 2453.25 | 3178.26 | 2095.51 | 1690.72 | 2251.59 | Down |
| Anxa13    | 46.0001 | -1.8596 | 0.6401    | -2.9052 | 0.00367  | 0.02987  | 98.9005 | 46.3622 | 71.1478 | 31.6112 | 4.12119 | 23.8579 | Down |
| Fam91a1   | 6655.07 | 0.27952 | 0.09432   | 2.9636  | 0.00304  | 0.02598  | 5776.38 | 6271.72 | 5989.08 | 6791.3  | 7518.09 | 7583.83 | Up   |
| Ndufb9    | 1388.38 | -0.2041 | 0.10112   | -2.0182 | 0.04357  | 0.17438  | 1557.93 | 1444.13 | 1457.07 | 1338.89 | 1310.54 | 1221.72 | Down |
| Mtss1     | 5050.71 | 0.31079 | 0.09646   | 3.22206 | 0.00127  | 0.01329  | 4186.13 | 4840.41 | 4499.85 | 5451.4  | 5710.94 | 5615.55 | Up   |
| Washc5    | 3290.25 | 0.23529 | 0.09764   | 2.40973 | 0.01596  | 0.08739  | 3071.79 | 3078.65 | 2917.06 | 3489.46 | 3827.56 | 3357    | Up   |
| Lratd2    | 11955.7 | -0.4653 | 0.20751   | -2.2424 | 0.02494  | 0.11857  | 16359.7 | 10377.2 | 14865   | 9988.11 | 8178.51 | 11965.7 | Down |
| Fam49b    | 4739.78 | 0.35324 | 0.13408   | 2.63459 | 0.00842  | 0.05464  | 4009.88 | 4724.01 | 3753.29 | 4966.01 | 5878.88 | 5106.58 | Up   |
| Asap1     | 2668.6  | 0.36827 | 0.12647   | 2.91178 | 0.00359  | 0.02941  | 2258.06 | 2403.93 | 2327.41 | 2799.12 | 3454.59 | 2768.51 | Up   |
| Oc90      | 8.7272  | 2.51085 | 1.08826   | 2.30722 | 0.02104  | 0.10593  | 1.95843 | 0       | 5.84776 | 22.4337 | 7.21209 | 14.9112 | Up   |
| Gm30929   | 24.7345 | -1.2144 | 0.56154   | -2.1626 | 0.03057  | 0.13697  | 30.3556 | 19.7286 | 53.6045 | 17.3352 | 15.4545 | 11.9289 | Down |
| Lrrc6     | 1215.87 | -1.0556 | 0.28799   | -3.6654 | 0.00025  | 0.00377  | 1866.38 | 1131.43 | 1927.81 | 866.758 | 502.786 | 1000.04 | Down |
| Gm7859    | 27.0234 | -1.2684 | 0.46752   | -2.7132 | 0.00666  | 0.04597  | 31.3348 | 36.4979 | 46.7821 | 13.2563 | 13.3939 | 20.8756 | Down |
| Gm2999    | 99.9063 | 0.62045 | 0.26409   | 2.34936 | 0.01881  | 0.09807  | 97.9213 | 75.9551 | 62.3761 | 116.247 | 124.666 | 122.272 | Up   |
| Col22a1   | 10.0944 | 2.37207 | 1.01389   | 2.33958 | 0.01931  | 0.09974  | 7.8337  | 1.97286 | 0       | 20.3943 | 15.4545 | 14.9112 | Up   |
| Mroh5     | 18.1631 | -1.5636 | 0.79472   | -1.9674 | 0.04913  | 0.189    | 19.5843 | 34.525  | 27.2896 | 2.03943 | 19.5757 | 5.96447 | Down |
| Arc       | 97.9637 | -1.4426 | 0.40255   | -3.5836 | 0.00034  | 0.00479  | 196.822 | 76.9415 | 155.94  | 63.2223 | 40.1816 | 54.6743 | Down |
| 4933427E  | 5.42914 | -2.1186 | 1.06637   | -1.9867 | 0.04695  | NA       | 10.7713 | 8.87787 | 6.82239 | 4.07886 | 1.0303  | 0.99408 | Down |
| Them6     | 890.778 | -0.4544 | 0.15253   | -2.9792 | 0.00289  | 0.02496  | 962.566 | 1090.99 | 1036.03 | 809.654 | 821.148 | 624.281 | Down |
| Lypd2     | 1305.64 | -2.6492 | 0.97334   | -2.7218 | 0.00649  | 0.04514  | 3504.6  | 560.292 | 2691.92 | 253.909 | 113.333 | 709.772 | Down |
| Slurp2    | 25.7453 | -2.3558 | 0.59542   | -3.9565 | 7.61E-05 | 0.00149  | 53.8567 | 31.5657 | 43.8582 | 9.17743 | 3.0909  | 12.923  | Down |
| Lynx1     | 1752.34 | -0.5978 | 0.15672   | -3.8147 | 0.00014  | 0.00239  | 2449.99 | 1791.36 | 2089.6  | 1528.55 | 1254.9  | 1399.66 | Down |
| Ly6m      | 135.266 | -1.7063 | 0.38777   | -4.4003 | 1.08E-05 | 0.0003   | 237.949 | 104.562 | 278.743 | 58.1237 | 56.6664 | 75.55   | Down |
| Ly6e      | 71062.8 | 0.25036 | 0.09748   | 2.56818 | 0.01022  | 0.06298  | 64596.7 | 62399.6 | 67740.5 | 82044.2 | 78641.7 | 70954.3 | Up   |
| Ly6i      | 3975.58 | 3.66312 | 0.5077    | 7.21508 | 5.39E-13 | 9.36E-11 | 392.664 | 467.568 | 884.962 | 9368.12 | 3932.65 | 8807.54 | Up   |
| Ly6c2     | 2561.26 | 1.43792 | 0.22206   | 6.47547 | 9.45E-11 | 1.01E-08 | 1213.24 | 1877.18 | 1052.6  | 3889.19 | 4044.95 | 3290.4  | Up   |
| Ly6g      | 11.9066 | 1.507   | 0.75834   | 1.98723 | 0.0469   | 0.18318  | 7.8337  | 1.97286 | 8.77165 | 23.4534 | 16.4848 | 12.923  | Up   |
| Ly6g2     | 122.872 | 3.97367 | 0.32262   | 12.317  | 7.34E-35 | 1.74E-31 | 15.6674 | 15.7829 | 12.6702 | 261.047 | 244.181 | 187.881 | Up   |
| Gm10238   | 2.36728 | 3.6488  | 1.80354   | 2.02313 | 0.04306  | NA       | 0       | 0.98643 | 0       | 3.05914 | 6.18179 | 3.97631 | Up   |
| 9030619P  | 3.15999 | 5.13264 | 2.52511   | 2.03264 | 0.04209  | NA       | 0       | 0       | 0       | 0       | 2.0606  | 16.8993 | Up   |
| Gsdmd     | 2753.81 | 0.27396 | 0.11643   | 2.35292 | 0.01863  | 0.09745  | 2204.21 | 2641.66 | 2633.44 | 3075.46 | 3100.17 | 2867.92 | Up   |
| Mapk15    | 5425.2  | -0.9759 | 0.26293   | -3.7117 | 0.00021  | 0.00327  | 7571.27 | 4900.58 | 9107.89 | 4534.67 | 2604.59 | 3832.17 | Down |
| Iqank1    | 823.302 | -0.5602 | 0.2146    | -2.6104 | 0.00904  | 0.05745  | 1066.36 | 740.809 | 1136.42 | 658.736 | 550.179 | 787.31  | Down |
| Nrbp2     | 3213.25 | 0.27766 | 0.09787   | 2.83703 | 0.00455  | 0.03495  | 2726.13 | 3003.68 | 2985.28 | 3404.83 | 3427.8  | 3731.77 | Up   |
| Gm41349   | 152.752 | -0.6851 | 0.24423   | -2.8053 | 0.00503  | 0.03753  | 169.404 | 164.734 | 230.987 | 112.169 | 103.03  | 136.189 | Down |
| Eppk1     | 848.589 | -0.5928 | 0.21689   | -2.7333 | 0.00627  | 0.04413  | 1064.4  | 747.714 | 1249.47 | 578.178 | 690.3   | 761.464 | Down |
| Gm19945   | 23.9332 | -1.0573 | 0.46439   | -2.2768 | 0.0228   | 0.11126  | 33.2932 | 30.5793 | 33.1373 | 11.2169 | 16.4848 | 18.8875 | Down |
| Mroh1     | 5615.38 | 0.20401 | 0.09851   | 2.0709  | 0.03837  | 0.16044  | 4998.88 | 5247.81 | 5410.16 | 6173.35 | 6326.03 | 5536.02 | Up   |
| Cpsf1     | 3733.32 | 0.21833 | 0.09626   | 2.2682  | 0.02332  | 0.11317  | 3467.39 | 3489    | 3397.55 | 4144.12 | 4210.83 | 3691.01 | Up   |
| Tonsl     | 408.37  | 0.41393 | 0.156     | 2.65333 | 0.00797  | 0.0523   | 315.307 | 353.142 | 382.054 | 514.956 | 453.331 | 431.43  | Up   |
| Apol9a    | 296.563 | -0.5852 | 0.28152   | -2.0786 | 0.03765  | 0.15832  | 294.743 | 336.372 | 436.633 | 292.658 | 154.545 | 264.425 | Down |
| Apol7b    | 12.0769 | 1.528   | 0.74945   | 2.03883 | 0.04147  | 0.16871  | 6.85449 | 9.8643  | 1.94925 | 22.4337 | 15.4545 | 15.9053 | Up   |
| Apol7c    | 67.253  | 0.94185 | 0.31633</ |         |          |          |         |         |         |         |         |         |      |

|           |         |         |         |         |          |          |         |         |         |         |         |         |      |
|-----------|---------|---------|---------|---------|----------|----------|---------|---------|---------|---------|---------|---------|------|
| Csf2rb2   | 1453.04 | 1.19442 | 0.22504 | 5.30769 | 1.11E-07 | 6.07E-06 | 901.855 | 1130.45 | 618.888 | 1755.95 | 2057.51 | 2253.58 | Up   |
| Csf2rb    | 3989.78 | 1.40506 | 0.19528 | 7.19495 | 6.25E-13 | 1.06E-10 | 2252.19 | 2659.41 | 1650.04 | 5260.71 | 6686.64 | 5429.66 | Up   |
| Mpst      | 1954.58 | -0.2593 | 0.13049 | -1.9869 | 0.04693  | 0.18321  | 2131.75 | 1978.78 | 2278.68 | 2012.92 | 1616.54 | 1708.82 | Down |
| Sstr3     | 18.9937 | -2.709  | 1.02954 | -2.6313 | 0.00851  | 0.05504  | 64.628  | 10.8507 | 23.3911 | 0       | 5.15149 | 9.94079 | Down |
| Rac2      | 2995.48 | 0.54031 | 0.19608 | 2.75556 | 0.00586  | 0.042    | 1940.8  | 3212.8  | 2169.52 | 3583.28 | 3664.77 | 3401.74 | Up   |
| Cyth4     | 2397.85 | 0.7759  | 0.18026 | 4.30431 | 1.68E-05 | 0.00042  | 1707.75 | 2149.43 | 1447.32 | 2749.15 | 3483.44 | 2850.02 | Up   |
| Lgals1    | 4234.91 | 0.53709 | 0.1488  | 3.60945 | 0.00031  | 0.00444  | 3781.72 | 3453.49 | 3131.48 | 5375.94 | 5497.67 | 4169.17 | Up   |
| Gm10865   | 20.1591 | -1.2644 | 0.56026 | -2.2568 | 0.02402  | 0.11556  | 23.5011 | 41.43   | 20.4672 | 10.1971 | 14.4242 | 10.9349 | Down |
| Gcat      | 13.2479 | 1.51542 | 0.66445 | 2.2807  | 0.02257  | 0.11052  | 8.81291 | 7.89144 | 3.89851 | 14.276  | 24.7272 | 19.8816 | Up   |
| Galr3     | 21.7609 | 1.01819 | 0.48927 | 2.08104 | 0.03743  | 0.15772  | 11.7506 | 17.7557 | 13.6448 | 27.5323 | 35.0301 | 24.852  | Up   |
| Gm3924    | 85.0864 | 1.15888 | 0.29145 | 3.97622 | 7.00E-05 | 0.00138  | 44.0646 | 66.0908 | 47.7567 | 120.326 | 131.878 | 100.402 | Up   |
| Ankrd54   | 1932.57 | -0.2792 | 0.10846 | -2.5742 | 0.01005  | 0.06215  | 2040.68 | 2094.19 | 2222.15 | 1883.41 | 1611.39 | 1743.61 | Down |
| Micall1   | 187.987 | 0.67718 | 0.20315 | 3.33341 | 0.00086  | 0.00974  | 132.194 | 137.114 | 164.712 | 217.199 | 213.272 | 263.431 | Up   |
| 1700088E  | 338.913 | -0.6897 | 0.29869 | -2.3092 | 0.02093  | 0.10549  | 488.627 | 300.861 | 465.872 | 265.126 | 171.03  | 341.963 | Down |
| Baiap2l2  | 61.7794 | -1.8415 | 0.41908 | -4.3943 | 1.11E-05 | 0.0003   | 103.797 | 75.9551 | 110.133 | 31.6112 | 13.3939 | 35.7868 | Down |
| Pla2g6    | 2148.5  | -0.3476 | 0.11781 | -2.9503 | 0.00317  | 0.02674  | 2447.05 | 2145.48 | 2625.65 | 1961.93 | 1809.2  | 1901.67 | Down |
| Fam227a   | 1156.85 | -0.7554 | 0.23091 | -3.2713 | 0.00107  | 0.01163  | 1591.22 | 1045.62 | 1722.17 | 888.172 | 678.967 | 1014.95 | Down |
| Cby1      | 1329.33 | -0.4213 | 0.12731 | -3.3095 | 0.00093  | 0.01042  | 1551.07 | 1358.31 | 1656.87 | 1181.85 | 1050.9  | 1176.99 | Down |
| Dnal4     | 2076.18 | -0.4468 | 0.14361 | -3.111  | 0.00186  | 0.01773  | 2654.65 | 2088.27 | 2442.42 | 1933.38 | 1561.93 | 1776.42 | Down |
| AC113595  | 193.795 | 0.67037 | 0.18707 | 3.58356 | 0.00034  | 0.00479  | 144.923 | 134.154 | 169.585 | 250.85  | 226.666 | 236.591 | Up   |
| Apobec3   | 9116.87 | 0.54864 | 0.13139 | 4.17555 | 2.97E-05 | 0.00068  | 7015.08 | 6538.06 | 8658.59 | 10838.5 | 10742.9 | 10908   | Up   |
| Pdgbf     | 5787.45 | 0.44254 | 0.20819 | 2.1256  | 0.03354  | 0.14629  | 3988.33 | 5628.57 | 5103.15 | 6196.81 | 8514.39 | 5293.47 | Up   |
| Slc25a17  | 5417.96 | -0.4227 | 0.14718 | -2.8717 | 0.00408  | 0.03211  | 6570.52 | 5221.17 | 6826.29 | 4683.55 | 4130.47 | 5075.76 | Down |
| Chadl     | 109.345 | -0.6404 | 0.25691 | -2.4925 | 0.01268  | 0.07351  | 117.506 | 125.277 | 156.915 | 71.38   | 87.5754 | 97.4197 | Down |
| Tob2      | 2581.4  | -0.3417 | 0.13081 | -2.6123 | 0.00899  | 0.05725  | 3018.91 | 2515.4  | 3122.71 | 2481.99 | 2186.29 | 2163.11 | Down |
| Csdc2     | 82.3015 | -1.0363 | 0.40896 | -2.534  | 0.01128  | 0.06751  | 147.861 | 66.0908 | 117.93  | 53.0252 | 72.1209 | 36.7809 | Down |
| Psmm1     | 1173.28 | -0.3898 | 0.14073 | -2.7701 | 0.0056   | 0.04065  | 1210.31 | 1262.63 | 1519.44 | 1027.87 | 1088    | 931.452 | Down |
| Septin3   | 334.926 | 0.64907 | 0.23518 | 2.75986 | 0.00578  | 0.04168  | 306.494 | 192.354 | 283.617 | 332.427 | 452.301 | 442.365 | Up   |
| Naga      | 8100.35 | 0.20545 | 0.08705 | 2.36001 | 0.01827  | 0.09622  | 7875.81 | 7198.96 | 7498.78 | 8915.37 | 8826.57 | 8286.64 | Up   |
| Cyp2d10   | 85.8083 | 2.43469 | 0.43997 | 5.5337  | 3.14E-08 | 1.99E-06 | 36.2309 | 22.6879 | 21.4418 | 226.377 | 94.7875 | 113.325 | Up   |
| Cyp2d34   | 44.1748 | 4.56121 | 0.83182 | 5.48341 | 4.17E-08 | 2.56E-06 | 8.81291 | 0       | 1.94925 | 145.819 | 59.7573 | 48.7098 | Up   |
| Nfam1     | 1846.19 | 0.91597 | 0.23357 | 3.92163 | 8.80E-05 | 0.00167  | 1136.87 | 1673.97 | 1026.28 | 2098.57 | 3055.87 | 2085.58 | Up   |
| Bik       | 800.769 | -0.4263 | 0.19626 | -2.1722 | 0.02984  | 0.13453  | 1015.44 | 1016.02 | 723.173 | 611.829 | 811.875 | 626.269 | Down |
| Efcab6    | 978.136 | -1.0907 | 0.29906 | -3.6472 | 0.00027  | 0.00397  | 1520.72 | 935.135 | 1537.96 | 655.677 | 384.301 | 835.026 | Down |
| Sult4a1   | 289.464 | -0.8189 | 0.25221 | -3.247  | 0.00117  | 0.01246  | 324.119 | 313.685 | 470.745 | 190.687 | 174.12  | 263.431 | Down |
| Pnpla5    | 70.9429 | 0.96569 | 0.41882 | 2.30575 | 0.02112  | 0.10618  | 53.8567 | 48.3351 | 41.909  | 95.8532 | 135.999 | 49.7039 | Up   |
| Gm33432   | 23.9294 | 1.83758 | 0.61356 | 2.99495 | 0.00274  | 0.02401  | 12.7298 | 10.8507 | 7.79702 | 25.4929 | 62.8482 | 23.8579 | Up   |
| Parvg     | 1000.21 | 1.03429 | 0.18759 | 5.51359 | 3.52E-08 | 2.20E-06 | 627.675 | 735.876 | 605.244 | 1242.01 | 1671.14 | 1119.33 | Up   |
| Rtl6      | 419.798 | -0.338  | 0.13391 | -2.5241 | 0.0116   | 0.0688   | 466.105 | 460.663 | 479.517 | 340.585 | 382.241 | 389.679 | Down |
| Prr5      | 238.935 | -0.6397 | 0.25409 | -2.5177 | 0.01181  | 0.06974  | 316.286 | 357.088 | 199.799 | 194.766 | 193.696 | 171.976 | Down |
| 5031439G  | 2669.98 | 0.39826 | 0.10705 | 3.72028 | 0.0002   | 0.00318  | 2372.63 | 2339.81 | 2198.76 | 3046.91 | 3277.38 | 2784.41 | Up   |
| Upk3a     | 280.921 | -1.4337 | 0.45858 | -3.1264 | 0.00177  | 0.01704  | 360.35  | 289.024 | 580.878 | 556.016 | 57.6967 | 241.561 | Down |
| Ribc2     | 248.342 | -1.4537 | 0.31364 | -4.6349 | 3.57E-06 | 0.00012  | 493.523 | 211.096 | 386.927 | 138.681 | 123.636 | 136.189 | Down |
| Wnt7b     | 1323.94 | -0.7209 | 0.25675 | -2.8079 | 0.00499  | 0.03729  | 1895.76 | 1114.67 | 1933.66 | 1162.47 | 735.633 | 1101.44 | Down |
| AU022754  | 416.057 | -0.6967 | 0.29306 | -2.3772 | 0.01745  | 0.09342  | 524.858 | 365.965 | 653     | 414.004 | 218.423 | 320.093 | Down |
| Lncppara  | 365.795 | 0.73213 | 0.16882 | 4.33666 | 1.45E-05 | 0.00037  | 295.722 | 226.879 | 302.134 | 455.813 | 443.028 | 471.193 | Up   |
| Ppara     | 172.85  | -0.9062 | 0.30712 | -2.9507 | 0.00317  | 0.02672  | 251.658 | 225.892 | 198.824 | 131.543 | 72.1209 | 157.064 | Down |
| Cdcpf1    | 1438.96 | -0.3921 | 0.10401 | -3.7697 | 0.00016  | 0.00273  | 1741.04 | 1551.65 | 1607.16 | 1301.16 | 1222.96 | 1209.79 | Down |
| Tbcd1d22a | 2042.86 | 0.36313 | 0.12381 | 2.933   | 0.00336  | 0.02795  | 1711.66 | 2009.36 | 1640.3  | 2376.96 | 2369.69 | 2149.2  | Up   |
| Tafa5     | 178.504 | -0.5368 | 0.25386 | -2.1146 | 0.03446  | 0.14899  | 225.219 | 191.367 | 217.342 | 114.208 | 192.666 | 130.224 | Down |
| Ttl8      | 318.094 | -1.1686 | 0.30683 | -3.8085 | 0.00014  | 0.00243  | 408.332 | 275.214 | 637.406 | 181.509 | 184.423 | 221.68  | Down |
| Mlc1      | 7662.8  | 0.39105 | 0.15426 | 2.53494 | 0.01125  | 0.06742  | 6581.29 | 7906.23 | 5404.31 | 8396.33 | 8906.93 | 8781.69 | Up   |
| Mov10l1   | 7.68668 | -3.3793 | 1.13277 | -2.9833 | 0.00285  | 0.02474  | 21.5427 | 6.90501 | 13.6448 | 2.03943 | 0       | 1.98816 | Down |
| Panx2     | 39.6848 | -1.2978 | 0.48303 | -2.6867 | 0.00722  | 0.04863  | 64.628  | 30.5793 | 74.0717 | 17.3352 | 22.6666 | 28.8283 | Down |
| Mapk11    | 1359.26 | 0.58984 | 0.1514  | 3.8958  | 9.79E-05 | 0.00183  | 1012.51 | 1015.04 | 1228.03 | 1404.15 | 1800.96 | 1694.9  | Up   |
| Plxbn2    | 22340.1 | 0.33262 | 0.09165 | 3.6294  | 0.00028  | 0.00419  | 19683.2 | 18529.1 | 21116.3 | 24771.9 | 24196.6 | 25743.7 | Up   |
| Tymp      | 1817.52 | -1.005  | 0.2351  | -4.2747 | 1.91E-05 | 0.00047  | 3080.6  | 1727.24 | 2470.68 | 1279.74 | 956.117 | 1390.72 | Down |
| Odf3b     | 2440.63 | -0.9173 | 0.22381 | -4.0986 | 4.16E-05 | 0.0009   | 3387.1  | 2390.12 | 3797.15 | 1958.87 | 1274.48 | 1836.06 | Down |
| Rab12     | 2307.94 | -0.9139 | 0.23627 | -3.8678 | 0.00011  | 0.00201  | 3510.48 | 2114.91 | 3420.94 | 1731.48 | 1219.87 | 1849.98 | Down |
| Syt10     | 93.031  | -2.1759 | 0.39613 | -5.493  | 3.95E-08 | 2.44E-06 | 186.05  | 90.7515 | 180.306 | 27.5323 | 27.8181 | 45.7276 | Down |
| Cpne8     | 2357.31 | 0.31989 | 0.1259  | 2.54079 | 0.01106  | 0.06649  | 2017.18 | 2294.44 | 1979.47 | 2361.66 | 2878.65 | 2612.44 | Up   |
| Kif21a    | 2584.58 | -0.9382 | 0.27011 | -3.4734 | 0.00051  | 0.0066   | 3955.04 | 2279.64 | 3955.04 | 1686.61 | 1294.05 | 2337.08 | Down |
| Abcd2     | 1874.85 | 1.14243 | 0.24677 | 4.62961 | 3.66E-06 | 0.00012  | 1060.49 | 1488.52 | 958.059 | 2236.23 | 3465.92 | 2039.85 | Up   |
| Lrrk2     | 19740.6 | 0.41293 | 0.18676 | 2.21096 | 0.02704  | 0.12551  | 17331.1 | 18453.1 | 15020   | 19206.3 | 19474.7 | 28958.5 | Up   |
| Prickle1  | 4128.09 | 0.6398  | 0.21007 | 3.04572 | 0.00232  | 0.02116  | 2420.61 | 3804.66 | 3457    | 4630.53 | 6164.28 | 4291.44 | Up   |
| Irak4     | 1327.68 | 0.48247 | 0.11211 | 4.30374 | 1.68E-05 | 0.00042  | 1153.51 | 1148.2  | 1021.41 | 1521.41 | 1644.36 | 1477.2  | Up   |
| Twf1      | 553.313 | 0.4591  | 0.19678 | 2.33301 | 0.01965  | 0.10092  | 559.13  | 391.613 | 447.354 | 590.415 | 573.876 | 757.488 | Up   |
| Ano6      | 1533.25 | 0.44389 | 0.13851 | 3.20477 | 0.00135  | 0.01388  | 1443.36 | 1160.04 | 1294.31 | 1604.01 | 1747.39 | 1950.38 | Up   |
| D030018L  | 1073.23 | -1.903  | 0.32953 | -5.7747 | 7.71E-09 | 5.81E-07 | 1299.42 | 1297.15 | 2484.32 | 552.685 | 271.999 | 533.82  | Down |
| Slc38a4   | 1237.26 | -1.4933 | 0.37424 | -3.9901 | 6.60E-05 | 0.00132  | 2035.78 | 2102.08 | 1340.11 | 617.947 | 298.787 | 1028.87 | Down |
| Rpap3     | 1231.2  | -0.284  | 0.12404 | -2.2899 | 0.02203  | 0.10888  | 1379.71 | 1227.12 | 1449.27 | 1144.12 | 1018.97 | 1168.04 | Down |
| Tmem106   | 1607.06 | -0.3244 | 0.12706 | -2.5531 | 0.01068  | 0.06502  | 1837.98 | 1691.73 | 1831.32 | 1539.77 | 1241.51 | 1500.06 | Down |
| Senp1     | 1875.63 | 0.20965 | 0.09827 | 2.13334 | 0.0329   | 0.14419  | 1665.64 | 1839.69 | 1713.39 | 1956.83 | 2106.96 | 1971.26 | Up   |
| Pfkm      | 1209.61 | -0.401  | 0.10787 | -3.7175 | 0.0002   | 0.00321  | 1347.4  | 1296.17 | 1486.31 | 1067.64 | 1029.27 | 1030.86 | Down |
| Ccdc184   | 162.259 | -1.226  | 0.53379 | -2.2968 | 0.02163  | 0.10754  | 225.219 | 377.803 | 78.9448 | 118.287 | 122.606 | 50.698  | Down |
| Adcy6     | 1943.82 | 0.37089 | 0.15998 | 2.31829 | 0.02043  | 0.10378  | 1859.53 | 1426.38 | 1800.14 | 2209.72 | 1898.84 | 2468.3  | Up   |
| Ccdc65    | 1214.8  | -1.0975 | 0.26617 | -4.1234 | 3.73E-05 | 0.00082  | 2074.95 | 1129    |         |         |         |         |      |

|          |         |         |         |         |          |          |         |         |         |         |         |         |      |
|----------|---------|---------|---------|---------|----------|----------|---------|---------|---------|---------|---------|---------|------|
| Fmnl3    | 3401.31 | 0.41226 | 0.15403 | 2.67652 | 0.00744  | 0.04966  | 2558.68 | 3373.59 | 2823.5  | 3885.11 | 4361.25 | 3405.71 | Up   |
| Faim2    | 706.922 | -0.6166 | 0.1554  | -3.9678 | 7.25E-05 | 0.00143  | 843.102 | 880.882 | 843.053 | 512.917 | 664.542 | 497.039 | Down |
| Aqp2     | 39.7173 | -2.2386 | 0.63271 | -3.5381 | 0.0004   | 0.00546  | 47.0022 | 41.43   | 108.184 | 25.4929 | 8.24239 | 7.95263 | Down |
| Asic1    | 323.642 | -0.7237 | 0.20887 | -3.465  | 0.00053  | 0.00675  | 374.059 | 506.038 | 329.424 | 229.436 | 251.393 | 251.502 | Down |
| Cox14    | 2333.28 | -0.2732 | 0.10567 | -2.585  | 0.00974  | 0.06054  | 2698.71 | 2515.4  | 2446.31 | 2257.65 | 2119.32 | 1962.31 | Down |
| Lima1    | 577.446 | 0.4623  | 0.14328 | 3.22655 | 0.00125  | 0.01314  | 464.147 | 482.364 | 510.705 | 598.573 | 658.361 | 750.529 | Up   |
| Tmprss12 | 34.89   | -2.5121 | 0.59936 | -4.1914 | 2.77E-05 | 0.00064  | 63.6488 | 43.4029 | 71.1478 | 7.138   | 4.12119 | 19.8816 | Down |
| Mettl7a1 | 28862.6 | -0.4123 | 0.09328 | -4.4202 | 9.86E-06 | 0.00027  | 30483.9 | 34319.9 | 34073.9 | 25162.5 | 23703   | 25432.5 | Down |
| Csrnp2   | 410.294 | -0.3616 | 0.15626 | -2.3139 | 0.02067  | 0.10455  | 449.459 | 515.903 | 419.09  | 352.821 | 333.817 | 390.673 | Down |
| Bin2     | 1358.97 | 0.58653 | 0.23369 | 2.50984 | 0.01208  | 0.07092  | 928.294 | 1449.07 | 882.038 | 1492.86 | 2002.9  | 1398.67 | Up   |
| Cela1    | 169.225 | 0.62659 | 0.20817 | 3.01    | 0.00261  | 0.0231   | 127.298 | 155.856 | 115.981 | 196.805 | 223.575 | 195.833 | Up   |
| Scn8a    | 44.6692 | 1.86531 | 0.50148 | 3.71961 | 0.0002   | 0.00319  | 18.605  | 7.89144 | 31.1881 | 77.4983 | 74.1815 | 58.6506 | Up   |
| Krt7     | 24590.7 | 0.34267 | 0.1276  | 2.68555 | 0.00724  | 0.04872  | 21373.3 | 20961.6 | 22716.6 | 29656.4 | 29521.1 | 23315.1 | Up   |
| Krt87    | 508.448 | 0.98278 | 0.29733 | 3.30536 | 0.00095  | 0.01055  | 365.246 | 234.77  | 424.937 | 943.236 | 535.755 | 546.743 | Up   |
| Krt79    | 951.743 | 2.01261 | 0.36371 | 5.53359 | 3.14E-08 | 1.99E-06 | 477.856 | 436.002 | 220.266 | 1119.65 | 2383.08 | 1073.6  | Up   |
| Krt78    | 17.0659 | 1.2471  | 0.60038 | 2.0772  | 0.03778  | 0.15871  | 6.85449 | 7.89144 | 15.594  | 18.3549 | 28.8484 | 24.852  | Up   |
| Igfbp6   | 5110.52 | -0.6407 | 0.26547 | -2.4135 | 0.0158   | 0.0867   | 7548.75 | 5298.11 | 5834.12 | 5273.97 | 4245.86 | 2462.33 | Down |
| Csad     | 2321.95 | -0.3163 | 0.11328 | -2.7918 | 0.00524  | 0.0387   | 2503.85 | 2397.02 | 2825.44 | 2160.78 | 1942.11 | 2102.48 | Down |
| Gm9918   | 13.5216 | -1.4849 | 0.68688 | -2.1618 | 0.03063  | 0.13706  | 26.4387 | 14.7964 | 18.5179 | 4.07886 | 11.3333 | 5.96447 | Down |
| Prr13    | 6922.72 | 0.27691 | 0.14087 | 1.96569 | 0.04933  | 0.18925  | 6595    | 6620.92 | 5565.12 | 7653.98 | 8547.36 | 6553.96 | Up   |
| Pcbp2    | 11207.8 | -0.2055 | 0.0776  | -2.6478 | 0.0081   | 0.053    | 12422.3 | 12028.5 | 11563   | 10641.7 | 10325.7 | 10265.8 | Down |
| Atp5g2   | 3822.95 | -0.2056 | 0.09299 | -2.2112 | 0.02702  | 0.1255   | 4098.01 | 3970.38 | 4216.24 | 3764.79 | 3543.2  | 3345.07 | Down |
| Nfe2     | 325.349 | 0.6328  | 0.32061 | 1.97375 | 0.04841  | 0.18691  | 176.258 | 359.06  | 230.012 | 352.821 | 534.725 | 299.218 | Up   |
| Gpr84    | 4.22298 | 2.44697 | 1.23967 | 1.97389 | 0.04839  | NA       | 0.97921 | 1.97286 | 0.97463 | 11.2169 | 7.21209 | 2.98224 | Up   |
| Itga5    | 2639.96 | 0.31819 | 0.12408 | 2.56433 | 0.01034  | 0.06344  | 2539.1  | 2472.98 | 2037.95 | 2933.72 | 3051.74 | 2804.3  | Up   |
| Nckap1l  | 2551.09 | 0.86973 | 0.17119 | 5.08051 | 3.76E-07 | 1.77E-05 | 1604.93 | 2201.71 | 1607.16 | 3121.35 | 3752.35 | 3019.02 | Up   |
| Ppp1r1a  | 148.969 | -0.9653 | 0.2674  | -3.61   | 0.00031  | 0.00443  | 241.866 | 195.313 | 153.991 | 95.8532 | 85.5148 | 121.278 | Down |
| Cluap1   | 975.512 | -0.5722 | 0.14562 | -3.9294 | 8.51E-05 | 0.00162  | 1126.09 | 1073.24 | 1300.15 | 845.344 | 685.148 | 823.097 | Down |
| Slx4     | 858.637 | 0.22462 | 0.10969 | 2.04784 | 0.04058  | 0.16623  | 760.848 | 822.682 | 792.372 | 912.645 | 887.087 | 976.185 | Up   |
| Dnase1   | 82.8258 | 0.51172 | 0.24807 | 2.06276 | 0.03914  | 0.16261  | 72.4617 | 71.0229 | 61.4015 | 92.7941 | 97.8784 | 101.396 | Up   |
| Adcy9    | 487.053 | 0.26794 | 0.13189 | 2.03149 | 0.04221  | 0.17067  | 454.355 | 431.07  | 440.532 | 501.7   | 514.119 | 580.542 | Up   |
| Srl      | 261.52  | -1.5447 | 0.49258 | -3.1359 | 0.00171  | 0.01663  | 549.338 | 112.453 | 506.806 | 123.386 | 107.151 | 169.987 | Down |
| Glis2    | 2188.51 | 0.43825 | 0.21786 | 2.01161 | 0.04426  | 0.1761   | 1461.96 | 2113.92 | 1999.94 | 2500.34 | 3138.29 | 1916.58 | Up   |
| 4930562C | 983.739 | -1.0213 | 0.27537 | -3.7086 | 0.00021  | 0.0033   | 1518.76 | 894.692 | 1540.89 | 647.519 | 461.574 | 839.002 | Down |
| Mgrn1    | 2753.81 | 0.32555 | 0.09442 | 3.44797 | 0.00056  | 0.00709  | 2517.56 | 2288.52 | 2527.21 | 2997.96 | 3011.56 | 3180.06 | Up   |
| Septin12 | 2.21142 | 4.6157  | 2.01377 | 2.29206 | 0.0219   | NA       | 0       | 0       | 0       | 5.09857 | 6.18179 | 1.98816 | Up   |
| Sec14l5  | 352.735 | -1.1529 | 0.30569 | -3.7716 | 0.00016  | 0.00271  | 428.895 | 313.685 | 717.326 | 224.337 | 190.605 | 241.561 | Down |
| Nagpa    | 1545.59 | 0.34909 | 0.16349 | 2.13528 | 0.03274  | 0.14381  | 1272    | 1589.14 | 1217.31 | 1704.96 | 1977.14 | 1512.99 | Up   |
| Pmm2     | 3004.17 | 0.26864 | 0.08787 | 3.05726 | 0.00223  | 0.02056  | 2662.48 | 2685.06 | 2828.37 | 3354.86 | 3137.26 | 3357    | Up   |
| Atf7ip2  | 40.0751 | 2.79054 | 0.43982 | 6.34477 | 2.23E-10 | 2.27E-08 | 7.8337  | 7.89144 | 14.6194 | 64.242  | 77.2724 | 68.5914 | Up   |
| Clec16a  | 2455.14 | -0.2575 | 0.11766 | -2.1888 | 0.02861  | 0.13081  | 2515.6  | 2998.75 | 2506.74 | 2214.82 | 2338.78 | 2156.16 | Down |
| Shisa9   | 65.6698 | -1.3017 | 0.29026 | -4.4846 | 7.31E-06 | 0.00022  | 97.9213 | 89.7651 | 92.5896 | 43.8477 | 37.0907 | 32.8046 | Down |
| Ntan1    | 1655.43 | 0.3334  | 0.09847 | 3.38583 | 0.00071  | 0.00838  | 1511.9  | 1481.62 | 1401.51 | 1942.56 | 1764.9  | 1830.1  | Up   |
| Mpv17l   | 1484.04 | -0.3938 | 0.17273 | -2.2799 | 0.02261  | 0.11066  | 1455.11 | 1611.83 | 1989.21 | 1233.86 | 1126.12 | 1488.14 | Down |
| Nde1     | 2728.65 | 0.28191 | 0.08918 | 3.16126 | 0.00157  | 0.01557  | 2346.19 | 2499.61 | 2542.8  | 2984.71 | 3090.9  | 2907.68 | Up   |
| Fopnl    | 2283.17 | -0.2082 | 0.09421 | -2.2105 | 0.02707  | 0.12554  | 2342.28 | 2424.64 | 2575.94 | 2177.09 | 2147.14 | 2031.9  | Down |
| Snai2    | 587.706 | 0.43319 | 0.211   | 2.05307 | 0.04007  | 0.16523  | 423.02  | 599.749 | 477.567 | 788.24  | 707.815 | 529.844 | Up   |
| Spag6l   | 3444.61 | -0.883  | 0.29646 | -2.9785 | 0.0029   | 0.02501  | 5172.2  | 3041.16 | 5187.94 | 2588.04 | 1476.42 | 3201.93 | Down |
| Igl1     | 10.2053 | -1.7328 | 0.82736 | -2.0943 | 0.03623  | 0.15445  | 22.5219 | 16.7693 | 7.79702 | 6.11829 | 2.0606  | 5.96447 | Down |
| 2610318N | 26.864  | 1.36561 | 0.52487 | 2.60178 | 0.00927  | 0.05849  | 14.6882 | 10.8507 | 19.4925 | 34.6703 | 55.6361 | 25.846  | Up   |
| Sdf2l1   | 1225.17 | 0.34088 | 0.13257 | 2.57138 | 0.01013  | 0.06252  | 1234.79 | 1041.67 | 966.83  | 1414.34 | 1370.3  | 1323.12 | Up   |
| Ccdc116  | 120.809 | 0.99774 | 0.30348 | 3.2877  | 0.00101  | 0.01108  | 72.4617 | 64.1179 | 105.26  | 203.943 | 133.939 | 145.135 | Up   |
| Rimbp3   | 4.07269 | 3.51892 | 1.6492  | 2.13372 | 0.03287  | NA       | 1.95843 | 0       | 0       | 11.2169 | 9.27269 | 1.98816 | Up   |
| Pi4ka    | 2351.08 | 0.28462 | 0.11319 | 2.51449 | 0.01192  | 0.07019  | 2266.88 | 2157.32 | 1935.61 | 2396.33 | 2664.35 | 2686    | Up   |
| Snap29   | 2614.3  | 0.27169 | 0.10745 | 2.52846 | 0.01146  | 0.06807  | 2371.65 | 2458.18 | 2276.73 | 2614.55 | 3087.8  | 2876.86 | Up   |
| Lrrc74b  | 2081.75 | -0.9375 | 0.33772 | -2.7761 | 0.0055   | 0.04006  | 3383.18 | 1744.99 | 3077.87 | 1612.17 | 768.603 | 1903.66 | Down |
| P2rx6    | 1211.89 | -0.6223 | 0.24869 | -2.5024 | 0.01234  | 0.07199  | 1636.26 | 958.81  | 1812.81 | 1021.75 | 781.997 | 1059.69 | Down |
| Slc7a4   | 65.5309 | -1.3744 | 0.45611 | -3.0134 | 0.00258  | 0.02298  | 110.651 | 49.3215 | 123.778 | 23.4534 | 42.2422 | 43.7395 | Down |
| Ccdc74a  | 1067.71 | -0.9291 | 0.24839 | -3.7405 | 0.00018  | 0.00299  | 1557.93 | 995.307 | 1647.12 | 868.797 | 538.846 | 798.245 | Down |
| B830017H | 28.7418 | -4.1677 | 0.80321 | -5.1888 | 2.12E-07 | 1.07E-05 | 73.441  | 24.6607 | 65.3    | 4.07886 | 0       | 4.97039 | Down |
| Dgcr6    | 3.37828 | 3.22488 | 1.49642 | 2.15506 | 0.03116  | NA       | 0.97921 | 0       | 0.97463 | 8.15772 | 6.18179 | 3.97631 | Up   |
| Prodh    | 1800.33 | -0.3992 | 0.11732 | -3.4025 | 0.00067  | 0.00803  | 1833.09 | 2081.37 | 2228.97 | 1505.1  | 1618.6  | 1534.86 | Down |
| Rtn4r    | 51.8155 | -1.195  | 0.50368 | -2.3726 | 0.01766  | 0.09426  | 114.568 | 35.5115 | 66.2747 | 25.4929 | 41.2119 | 27.8342 | Down |
| Dgcr8    | 551.657 | 0.30349 | 0.12197 | 2.4882  | 0.01284  | 0.07423  | 491.565 | 469.54  | 520.451 | 587.356 | 605.815 | 635.216 | Up   |
| Arvcf    | 1522.17 | -0.3179 | 0.13807 | -2.3023 | 0.02132  | 0.1067   | 1623.53 | 1590.12 | 1853.74 | 1434.74 | 1457.87 | 1173.01 | Down |
| Tbx1     | 1368.87 | -1.1612 | 0.29211 | -3.9754 | 7.02E-05 | 0.00138  | 2116.08 | 1239.94 | 2319.61 | 960.571 | 549.149 | 1027.88 | Down |
| 4930588K | 46.2386 | -1.4648 | 0.43434 | -3.3725 | 0.00075  | 0.00871  | 55.8151 | 61.1586 | 86.7418 | 25.4929 | 14.4242 | 33.7987 | Down |
| Cldn5    | 14472   | -0.4429 | 0.21913 | -2.0211 | 0.04327  | 0.17352  | 18612.9 | 19558.9 | 11856.3 | 12812.7 | 14174.8 | 9816.53 | Down |
| Gm28539  | 135.82  | -0.9427 | 0.21632 | -4.358  | 1.31E-05 | 0.00034  | 203.676 | 166.707 | 165.687 | 96.8729 | 86.5451 | 95.4315 | Down |
| Lamp3    | 74272.8 | 0.75895 | 0.17803 | 4.26312 | 2.02E-05 | 0.00049  | 58242.6 | 65066.9 | 42216   | 83016   | 95834.2 | 101261  | Up   |
| Cyp2ab1  | 178.991 | 0.80251 | 0.31495 | 2.54807 | 0.01083  | 0.06552  | 157.653 | 145.992 | 87.7165 | 167.233 | 294.665 | 220.685 | Up   |
| Abcc5    | 8983.81 | 0.25228 | 0.09435 | 2.674   | 0.0075   | 0.04995  | 8756.12 | 8095.63 | 7749.26 | 9302.86 | 9901.17 | 10097.8 | Up   |
| Vwa5b2   | 7.24867 | -1.9095 | 0.93048 | -2.0522 | 0.04015  | NA       | 6.85449 | 16.7693 | 10.7209 | 5.09857 | 2.0606  | 1.98816 | Down |
| Eif4g1   | 14480.2 | 0.20557 | 0.08087 | 2.54194 | 0.01102  | 0.06636  | 13717.8 | 12995.2 | 13638   | 14874.6 | 15560.6 | 16095.1 | Up   |
| Fam131a  | 1052.79 | -0.7725 | 0.18165 | -4.2525 | 2.11E-05 | 0.00051  | 1419.86 | 1078.17 | 1486.31 | 844.324 | 648.058 | 839.996 | Down |
| Ehhadh   | 974.011 | 0.24343 | 0.11812 | 2.06082 | 0.03932  | 0.1631   | 919.481 | 915.407 | 841.103 | 1066.62 | 1130.24 | 971.215 | Up   |
| Etv5     | 11384.8 | 0.49698 | 0.24029 | 2.06828 | 0.03861  | 0.16127  | 8726.74 | 12523.7 | 7078.72 | 13512.2 | 16235.4 | 10232.1 | Up   |
| Kng2     | 3607.01 | 4       |         |         |          |          |         |         |         |         |         |         |      |

|          |         |         |         |         |          |          |         |         |         |         |         |         |      |
|----------|---------|---------|---------|---------|----------|----------|---------|---------|---------|---------|---------|---------|------|
| Mb21d2   | 642.869 | -0.5764 | 0.13675 | -4.215  | 2.50E-05 | 0.00059  | 789.245 | 819.723 | 699.782 | 505.779 | 562.543 | 480.14  | Down |
| Plaatt1  | 21.26   | -1.4918 | 0.50773 | -2.9382 | 0.0033   | 0.02755  | 23.5011 | 36.4979 | 34.112  | 11.2169 | 10.303  | 11.9289 | Down |
| Gm1968   | 166.57  | -1.0452 | 0.25993 | -4.0213 | 5.79E-05 | 0.00118  | 170.383 | 242.662 | 260.225 | 89.7349 | 108.181 | 128.236 | Down |
| Hes1     | 5320.51 | -0.4433 | 0.17712 | -2.5026 | 0.01233  | 0.07196  | 6037.83 | 4743.74 | 7612.81 | 4439.84 | 4523.01 | 4565.8  | Down |
| Cpn2     | 316.712 | 1.47168 | 0.31281 | 4.70472 | 2.54E-06 | 8.86E-05 | 139.048 | 168.679 | 195.9   | 533.311 | 267.878 | 595.453 | Up   |
| Gp5      | 123.896 | -1.0091 | 0.32028 | -3.1508 | 0.00163  | 0.01597  | 118.485 | 158.815 | 219.291 | 104.011 | 74.1815 | 68.5914 | Down |
| Atp13a3  | 16952   | 0.29356 | 0.13475 | 2.17846 | 0.02937  | 0.13307  | 16298   | 13047.5 | 16354.2 | 19063.6 | 16872.2 | 20076.4 | Up   |
| Fam43a   | 2344.1  | -0.4012 | 0.15375 | -2.6094 | 0.00907  | 0.05756  | 2817.2  | 2175.08 | 3011.6  | 2154.66 | 1876.17 | 2029.91 | Down |
| Gm49755  | 4.56148 | -5.6116 | 1.72078 | -3.2611 | 0.00111  | NA       | 6.85449 | 3.94572 | 16.5687 | 0       | 0       | 0       | Down |
| Gm49756  | 85.1965 | -9.8346 | 1.31795 | -7.4621 | 8.52E-14 | 1.71E-11 | 155.695 | 60.1722 | 295.312 | 0       | 0       | 0       | Down |
| Gm49757  | 61.4139 | -9.3624 | 1.328   | -7.05   | 1.79E-12 | 2.80E-10 | 97.9213 | 49.3215 | 221.24  | 0       | 0       | 0       | Down |
| Gm46565  | 299.447 | 0.85676 | 0.41297 | 2.07462 | 0.03802  | 0.15939  | 368.184 | 167.693 | 103.31  | 422.162 | 302.908 | 432.424 | Up   |
| Acap2    | 5272.58 | 0.23916 | 0.101   | 2.36791 | 0.01789  | 0.09509  | 4850.04 | 4473.46 | 5185.99 | 5621.69 | 5990.16 | 5514.15 | Up   |
| Gm41442  | 330.859 | -0.3659 | 0.18234 | -2.0068 | 0.04477  | 0.17733  | 373.08  | 425.151 | 319.678 | 274.303 | 267.878 | 325.064 | Down |
| Gm49767  | 147.659 | 0.65417 | 0.24548 | 2.66481 | 0.0077   | 0.05096  | 97.9213 | 143.032 | 103.31  | 154.997 | 197.817 | 188.875 | Up   |
| Apod     | 414.128 | -1.5095 | 0.20423 | -7.3913 | 1.45E-13 | 2.81E-11 | 571.86  | 584.953 | 682.239 | 173.352 | 202.969 | 269.395 | Down |
| Bdh1     | 578.426 | -0.7176 | 0.25651 | -2.7978 | 0.00515  | 0.03819  | 755.952 | 468.554 | 933.693 | 460.911 | 382.241 | 469.205 | Down |
| Gm20056  | 22.7163 | 1.01752 | 0.4636  | 2.19485 | 0.02817  | 0.12938  | 14.6882 | 13.81   | 16.5687 | 25.4929 | 31.9393 | 33.7987 | Up   |
| Tctex1d2 | 1023.09 | -0.7301 | 0.1798  | -4.0606 | 4.89E-05 | 0.00103  | 1456.09 | 1018.98 | 1354.73 | 774.983 | 674.845 | 858.884 | Down |
| Tfrc     | 8770.43 | 0.44097 | 0.16388 | 2.6908  | 0.00713  | 0.0482   | 6938.7  | 7337.06 | 8045.55 | 8670.64 | 9174.81 | 12455.8 | Up   |
| Tnk2     | 2467.68 | -0.2939 | 0.0838  | -3.5073 | 0.00045  | 0.00597  | 2638.98 | 2775.81 | 2739.68 | 2228.08 | 2259.44 | 2164.11 | Down |
| Muc4     | 4136.13 | 0.87588 | 0.28878 | 3.03304 | 0.00242  | 0.02185  | 3678.9  | 1591.11 | 3483.32 | 5200.55 | 4570.4  | 6292.52 | Up   |
| Muc20    | 4135.55 | 1.05649 | 0.29481 | 3.58358 | 0.00034  | 0.00479  | 2419.63 | 1605.91 | 4031.06 | 5864.38 | 4642.52 | 6249.77 | Up   |
| 1700007L | 53.2027 | -0.7999 | 0.32855 | -2.4345 | 0.01491  | 0.0831   | 67.5657 | 61.1586 | 74.0717 | 41.8083 | 29.8787 | 44.7335 | Down |
| Gm15657  | 362.414 | 0.44574 | 0.17703 | 2.51797 | 0.0118   | 0.06972  | 305.514 | 341.305 | 273.87  | 460.911 | 356.483 | 436.4   | Up   |
| Muc13    | 587.17  | 5.04382 | 0.76239 | 6.61582 | 3.69E-11 | 4.51E-09 | 38.1893 | 12.8236 | 52.6299 | 1845.68 | 454.362 | 1119.33 | Up   |
| Kalr1    | 1538.61 | 0.57049 | 0.15223 | 3.74767 | 0.00018  | 0.00293  | 1161.35 | 1131.43 | 1421.98 | 1778.38 | 2086.35 | 1652.16 | Up   |
| Ccdc14   | 508.446 | -0.516  | 0.18207 | -2.834  | 0.0046   | 0.0352   | 536.609 | 519.848 | 738.767 | 410.945 | 411.089 | 433.418 | Down |
| Sema5b   | 45.2604 | -5.7134 | 0.74884 | -7.6296 | 2.35E-14 | 5.50E-12 | 98.9005 | 73.9822 | 93.5642 | 0       | 4.12119 | 0.99408 | Down |
| Slc49a4  | 3251.58 | 0.34811 | 0.09562 | 3.64049 | 0.00027  | 0.00404  | 2771.17 | 2812.31 | 2999.9  | 3679.13 | 3821.38 | 3425.59 | Up   |
| Hspbp1   | 681.704 | 0.44701 | 0.11977 | 3.73224 | 0.00019  | 0.00306  | 594.382 | 560.292 | 576.005 | 815.772 | 819.087 | 724.683 | Up   |
| Parp14   | 5107.9  | 0.42248 | 0.14782 | 2.85811 | 0.00426  | 0.03325  | 3715.13 | 4895.65 | 4485.23 | 5206.66 | 5860.34 | 6484.37 | Up   |
| Dtx3l    | 2684.41 | 0.58214 | 0.1232  | 4.72519 | 2.30E-06 | 8.19E-05 | 1965.28 | 2084.33 | 2400.51 | 2967.37 | 3330.95 | 3358    | Up   |
| Parp9    | 1545.66 | 0.31298 | 0.09853 | 3.17646 | 0.00149  | 0.01494  | 1313.12 | 1421.45 | 1401.51 | 1653.98 | 1687.63 | 1796.3  | Up   |
| Fam162a  | 2217.91 | 0.31099 | 0.12171 | 2.55526 | 0.01061  | 0.06467  | 1951.57 | 2074.46 | 1913.19 | 2337.19 | 2771.5  | 2259.54 | Up   |
| Csta2    | 97.0098 | 6.61447 | 0.65093 | 10.1615 | 2.94E-24 | 3.28E-21 | 0       | 1.97286 | 3.89851 | 190.687 | 220.484 | 165.017 | Up   |
| Stfa1    | 7.91893 | 6.4575  | 1.50923 | 4.27866 | 1.88E-05 | 0.00046  | 0       | 0       | 0       | 21.414  | 7.21209 | 18.8875 | Up   |
| Slc15a2  | 5788.97 | -0.9869 | 0.12634 | -7.8115 | 5.65E-15 | 1.46E-12 | 8344.85 | 7379.48 | 7361.36 | 3443.58 | 4338.59 | 3865.97 | Down |
| Golgb1   | 6001.42 | 0.21188 | 0.09837 | 2.15385 | 0.03125  | 0.13863  | 5722.52 | 5337.57 | 5624.57 | 6635.28 | 5913.91 | 6774.65 | Up   |
| Hcls1    | 1910.2  | 0.84209 | 0.16904 | 4.9817  | 6.30E-07 | 2.71E-05 | 1220.1  | 1632.54 | 1251.42 | 2235.22 | 2840.53 | 2281.41 | Up   |
| Fstl1    | 3681.55 | 0.49746 | 0.13771 | 3.61248 | 0.0003   | 0.00441  | 3227.49 | 3171.37 | 2760.14 | 4350.1  | 4844.46 | 3735.75 | Up   |
| Gsk3b    | 5892.43 | 0.2932  | 0.08321 | 3.52357 | 0.00043  | 0.00567  | 5178.08 | 5276.41 | 5432.57 | 6353.84 | 6809.24 | 6304.45 | Up   |
| Nr1i2    | 409.85  | -0.9442 | 0.34236 | -2.758  | 0.00582  | 0.04183  | 605.153 | 361.033 | 652.026 | 333.447 | 154.545 | 352.898 | Down |
| Maats1   | 1631.33 | -0.7645 | 0.29389 | -2.6012 | 0.00929  | 0.05851  | 2525.39 | 1341.54 | 2294.27 | 1333.79 | 780.966 | 1511.99 | Down |
| Popdc2   | 586.296 | -0.4674 | 0.16862 | -2.7722 | 0.00557  | 0.04044  | 728.534 | 560.292 | 752.412 | 492.522 | 533.695 | 450.318 | Down |
| D930030H | 4.43588 | -2.4767 | 1.22799 | -2.0168 | 0.04371  | NA       | 6.85449 | 9.8643  | 5.84776 | 0       | 2.0606  | 1.98816 | Down |
| Poglut1  | 2266.88 | 0.22126 | 0.09774 | 2.26371 | 0.02359  | 0.11397  | 2199.31 | 2123.78 | 1957.05 | 2375.94 | 2535.56 | 2409.65 | Up   |
| Arhgap31 | 11257.3 | 0.60693 | 0.12904 | 4.70332 | 2.56E-06 | 8.87E-05 | 7950.23 | 9754.8  | 9065.98 | 12792.3 | 15185.6 | 12794.8 | Up   |
| Upk1b    | 2003.17 | 0.47996 | 0.15886 | 3.02124 | 0.00252  | 0.02252  | 1615.7  | 1608.87 | 1794.29 | 2727.74 | 2371.75 | 1900.68 | Up   |
| Igslf11  | 247.017 | -0.692  | 0.27895 | -2.4807 | 0.01311  | 0.07546  | 328.036 | 225.892 | 361.587 | 208.022 | 132.908 | 225.656 | Down |
| Ccdc191  | 1273.11 | -0.7165 | 0.22669 | -3.1605 | 0.00157  | 0.0156   | 1691.1  | 1162.01 | 1895.65 | 1006.46 | 754.178 | 1129.27 | Down |
| Atp6v1a  | 10353.3 | 0.27714 | 0.09461 | 2.92924 | 0.0034   | 0.02817  | 9411.21 | 9663.06 | 9011.4  | 10469.4 | 11786.6 | 11777.8 | Up   |
| Naa50    | 6000.14 | 0.23959 | 0.0834  | 2.87282 | 0.00407  | 0.03202  | 5528.64 | 5401.69 | 5578.77 | 6189.67 | 6795.85 | 6506.24 | Up   |
| Sidtl    | 790.981 | 0.85568 | 0.11976 | 7.14471 | 9.02E-13 | 1.50E-10 | 566.964 | 516.889 | 605.244 | 981.985 | 1050.9  | 1023.9  | Up   |
| Cfap44   | 3045.16 | -1.4485 | 0.31014 | -4.6706 | 3.00E-06 | 0.0001   | 5004.76 | 2918.85 | 5448.17 | 1925.22 | 953.026 | 2020.96 | Down |
| Nepro    | 422.459 | 0.30062 | 0.12589 | 2.38786 | 0.01695  | 0.09143  | 394.623 | 363.993 | 377.181 | 466.01  | 466.725 | 466.223 | Up   |
| Cd200r1  | 731.405 | 1.77608 | 0.21024 | 8.44787 | 2.97E-17 | 1.15E-14 | 316.286 | 413.314 | 262.175 | 1132.9  | 1307.45 | 956.304 | Up   |
| Gm19142  | 25.91   | 1.76681 | 0.51134 | 3.45525 | 0.00055  | 0.00693  | 11.7506 | 12.8236 | 10.7209 | 34.6703 | 56.6664 | 28.8283 | Up   |
| Cd200r4  | 1042.09 | 1.69373 | 0.21538 | 7.8638  | 3.73E-15 | 1.07E-12 | 523.879 | 512.943 | 439.557 | 1560.16 | 2041.02 | 1175    | Up   |
| Cd200r2  | 66.3076 | 4.42802 | 0.75843 | 5.83838 | 5.27E-09 | 4.14E-07 | 5.87528 | 7.89144 | 3.89851 | 93.8138 | 256.544 | 29.8224 | Up   |
| Ccdc80   | 1559.16 | 0.68631 | 0.20248 | 3.38953 | 0.0007   | 0.00831  | 1557.93 | 1078.17 | 949.287 | 2023.11 | 2029.69 | 1716.77 | Up   |
| Slc35a5  | 2325.57 | 0.48598 | 0.10858 | 4.47578 | 7.61E-06 | 0.00022  | 1841.9  | 1889.01 | 2081.8  | 2701.22 | 2541.75 | 2897.74 | Up   |
| Atg3     | 4227.51 | 0.30633 | 0.09849 | 3.11015 | 0.00187  | 0.01776  | 3606.44 | 3817.48 | 3917.03 | 4695.79 | 4973.25 | 4355.06 | Up   |
| Btla     | 1031.64 | 0.5363  | 0.17433 | 3.07634 | 0.0021   | 0.0195   | 744.202 | 919.352 | 862.545 | 1181.85 | 1460.96 | 1020.92 | Up   |
| Cd200    | 8494.71 | 0.94444 | 0.10291 | 9.17696 | 4.43E-20 | 2.62E-17 | 5690.21 | 6179    | 5559.27 | 11947   | 10332.9 | 11259.9 | Up   |
| Gm609    | 20.8377 | 1.83178 | 0.58853 | 3.11247 | 0.00186  | 0.01765  | 5.87528 | 6.90501 | 14.6194 | 39.7689 | 33.9998 | 23.8579 | Up   |
| Tagln3   | 27.5941 | 1.64316 | 0.53846 | 3.0516  | 0.00228  | 0.02088  | 19.5843 | 8.87787 | 11.6955 | 27.5323 | 41.2119 | 56.6625 | Up   |
| Abhd10   | 835.44  | 0.31129 | 0.13109 | 2.37461 | 0.01757  | 0.09386  | 657.052 | 820.709 | 759.235 | 956.493 | 904.602 | 914.552 | Up   |
| Phldb2   | 13275.9 | 0.30295 | 0.14913 | 2.03145 | 0.04221  | 0.17067  | 11662.4 | 13823.8 | 10175.1 | 13395   | 14312.9 | 16286   | Up   |
| Retnlb   | 8.82526 | 3.63855 | 1.26495 | 2.87645 | 0.00402  | 0.0318   | 0       | 3.94572 | 0       | 15.2957 | 25.7575 | 7.95263 | Up   |
| Retnla   | 54157.8 | 1.8895  | 0.22768 | 8.29897 | 1.05E-16 | 3.75E-14 | 22432.8 | 22107.9 | 24522.6 | 84537.4 | 114090  | 57255.9 | Up   |
| Cip2a    | 238.067 | 0.42984 | 0.16997 | 2.52893 | 0.01144  | 0.06807  | 193.884 | 210.11  | 204.672 | 255.948 | 258.605 | 305.182 | Up   |
| Ift57    | 1534.32 | -0.8147 | 0.22594 | -3.6057 | 0.00031  | 0.00449  | 2275.69 | 1389.88 | 2203.63 | 1139.02 | 899.451 | 1298.27 | Down |
| Dubr     | 2375.26 | 1.15496 | 0.09215 | 12.5334 | 4.90E-36 | 1.55E-32 | 1442.38 | 1529.95 | 1444.4  | 3123.39 | 3320.65 | 3390.8  | Up   |
| Nfkbi3   | 2881.31 | 0.29787 | 0.14473 | 2.05815 | 0.03958  | 0.16394  | 2461.74 | 3006.64 | 2286.48 | 3452.75 | 2898.23 | 3182.05 | Up   |
| Nxpe3    | 836.203 | -0.601  | 0.17024 | -3.5302 | 0.00042  | 0.00559  | 870.52  | 1148.2  | 1004.84 | 712.781 | 721.209 | 559.666 | Down |
| Gm28037  | 14.1209 | 2.13768 | 0.65044 | 3.2865  | 0.00101  | 0.01111  | 2.93764 | 6.90501 | 5.84776 | 25.4929 | 22.6666 | 2       |      |

|          |         |         |         |         |          |          |         |         |         |         |         |         |      |
|----------|---------|---------|---------|---------|----------|----------|---------|---------|---------|---------|---------|---------|------|
| Riox2    | 856.357 | 0.4006  | 0.11802 | 3.39438 | 0.00069  | 0.00822  | 809.809 | 685.569 | 719.275 | 974.847 | 968.481 | 980.161 | Up   |
| Crybg3   | 3366.33 | 0.29552 | 0.10347 | 2.85613 | 0.00429  | 0.03338  | 3126.63 | 2887.28 | 3054.48 | 3554.73 | 3533.92 | 4040.93 | Up   |
| Arl6     | 1329.75 | -0.522  | 0.21591 | -2.4175 | 0.01563  | 0.08609  | 1902.61 | 1181.74 | 1618.86 | 1228.76 | 869.572 | 1176.99 | Down |
| 4930547E | 2.77499 | -4.8944 | 1.90903 | -2.5638 | 0.01035  | NA       | 9.79213 | 2.95929 | 3.89851 | 0       | 0       | 0       | Down |
| Prosl    | 6681.63 | 0.23739 | 0.10565 | 2.24691 | 0.02465  | 0.11748  | 6576.39 | 6088.24 | 5734.71 | 6996.26 | 7796.27 | 6897.91 | Up   |
| Cggbp1   | 8385.61 | 0.2038  | 0.08977 | 2.27008 | 0.0232   | 0.11279  | 7996.25 | 7776.02 | 7610.86 | 8682.87 | 8634.93 | 9612.74 | Up   |
| Cadm2    | 102     | -1.2516 | 0.34284 | -3.6507 | 0.00026  | 0.00394  | 190.946 | 112.453 | 127.676 | 50.9857 | 48.424  | 81.5144 | Down |
| Samsn1   | 744.077 | 0.70796 | 0.22911 | 3.08997 | 0.002    | 0.01881  | 453.376 | 750.673 | 491.212 | 887.152 | 1081.81 | 800.233 | Up   |
| 4930578N | 61.3362 | -2.5115 | 0.47564 | -5.2801 | 1.29E-07 | 6.92E-06 | 83.2331 | 147.964 | 81.8687 | 10.1971 | 28.8484 | 15.9053 | Down |
| Nrip1    | 1744.27 | 0.24062 | 0.10396 | 2.31457 | 0.02064  | 0.10448  | 1671.52 | 1656.22 | 1469.74 | 1829.37 | 1941.08 | 1897.7  | Up   |
| Mir99ahg | 459.582 | -0.2928 | 0.13391 | -2.1866 | 0.02877  | 0.13136  | 464.147 | 531.686 | 522.4   | 396.669 | 413.15  | 429.442 | Down |
| Chodl    | 83.6205 | -1.3162 | 0.60104 | -2.19   | 0.02853  | 0.13055  | 68.5449 | 243.648 | 45.8075 | 35.69   | 47.3937 | 60.6388 | Down |
| Mrpl39   | 2421.05 | -0.3344 | 0.13495 | -2.4783 | 0.0132   | 0.07579  | 2985.62 | 2436.48 | 2679.25 | 2271.92 | 1887.51 | 2265.5  | Down |
| Jam2     | 3941.54 | 0.27429 | 0.11783 | 2.32785 | 0.01992  | 0.10199  | 3413.54 | 3500.84 | 3789.35 | 4359.28 | 4733.19 | 3853.05 | Up   |
| Cyyr1    | 6652.93 | 0.36543 | 0.16532 | 2.21036 | 0.02708  | 0.12554  | 5245.64 | 6791.57 | 5407.23 | 6900.41 | 8893.54 | 6679.21 | Up   |
| Adamts1  | 6499.83 | 0.55355 | 0.26728 | 2.07104 | 0.03835  | 0.16043  | 5400.36 | 6867.52 | 3535.95 | 8603.33 | 9126.38 | 5465.44 | Up   |
| Adamts5  | 774.96  | -0.7923 | 0.16815 | -4.712  | 2.45E-06 | 8.59E-05 | 1016.42 | 1040.68 | 890.809 | 571.04  | 467.755 | 663.05  | Down |
| Bach1    | 3839.05 | 0.31876 | 0.08377 | 3.80508 | 0.00014  | 0.00246  | 3395.91 | 3463.35 | 3390.73 | 4051.33 | 4354.04 | 4378.92 | Up   |
| Grik1    | 54.3464 | -1.757  | 0.6501  | -2.7026 | 0.00688  | 0.04697  | 52.8775 | 80.8872 | 117.93  | 25.4929 | 5.15149 | 43.7395 | Down |
| Cldn8    | 584.674 | -1.3614 | 0.40455 | -3.3653 | 0.00076  | 0.0089   | 695.241 | 631.315 | 1198.79 | 328.348 | 148.363 | 505.986 | Down |
| Tiam1    | 2373.37 | -0.6098 | 0.21518 | -2.8339 | 0.0046   | 0.0352   | 2943.51 | 2098.14 | 3561.29 | 1772.26 | 1641.27 | 2223.75 | Down |
| Sod1     | 10331.6 | -0.2786 | 0.11791 | -2.363  | 0.01813  | 0.09597  | 11529.3 | 10136.6 | 12312.5 | 10117.6 | 8907.96 | 8985.48 | Down |
| Gm49708  | 96.012  | 3.45871 | 0.52903 | 6.53786 | 6.24E-11 | 7.29E-09 | 5.87528 | 19.7286 | 22.4164 | 236.574 | 203.999 | 87.4789 | Up   |
| Mis18a   | 647.892 | 0.27213 | 0.13776 | 1.97542 | 0.04822  | 0.18656  | 558.151 | 564.238 | 638.381 | 743.372 | 747.997 | 635.216 | Up   |
| Mrap     | 64.4629 | -1.7811 | 0.60396 | -2.9491 | 0.00319  | 0.02681  | 197.801 | 37.4843 | 64.3254 | 23.4534 | 30.909  | 32.8046 | Down |
| Cfap298  | 1298.01 | -0.5891 | 0.2031  | -2.9004 | 0.00373  | 0.03016  | 1713.62 | 1201.47 | 1763.1  | 1180.83 | 835.572 | 1093.49 | Down |
| Ifnar2   | 1810.1  | 0.35766 | 0.10068 | 3.55237 | 0.00038  | 0.00522  | 1468.82 | 1672.98 | 1618.86 | 2062.88 | 1982.29 | 2054.76 | Up   |
| Il10rb   | 5001.93 | 0.34001 | 0.0909  | 3.74054 | 0.00018  | 0.00299  | 4164.59 | 4595.78 | 4485.23 | 5765.47 | 5656.34 | 5344.17 | Up   |
| Ifngr2   | 4771.49 | 0.57387 | 0.13334 | 4.30391 | 1.68E-05 | 0.00042  | 3764.09 | 4390.6  | 3349.79 | 5416.73 | 6093.19 | 5614.56 | Up   |
| Kcne2    | 2622    | -0.7225 | 0.30494 | -2.3693 | 0.01782  | 0.09485  | 3825.78 | 4250.53 | 1719.24 | 1932.36 | 1639.2  | 2364.91 | Down |
| 1700029J | 60.6974 | 1.88785 | 0.37177 | 5.07799 | 3.81E-07 | 1.79E-05 | 22.5219 | 30.5793 | 24.3657 | 124.405 | 92.7269 | 69.5855 | Up   |
| Gm30695  | 16.5718 | -2.3616 | 0.73448 | -3.2154 | 0.0013   | 0.01349  | 11.7506 | 29.5929 | 41.909  | 5.09857 | 4.12119 | 6.95855 | Down |
| Gm5678   | 9.65734 | -4.779  | 1.26437 | -3.7798 | 0.00016  | 0.00265  | 22.5219 | 18.7422 | 14.6194 | 0       | 2.0606  | 0       | Down |
| Cbr3     | 1235.73 | -0.4441 | 0.19746 | -2.2493 | 0.02449  | 0.11694  | 1547.16 | 1071.26 | 1654.92 | 1190.01 | 923.147 | 1027.88 | Down |
| Chaf1b   | 413.855 | 0.36438 | 0.14991 | 2.4306  | 0.01507  | 0.0837   | 357.413 | 337.359 | 390.826 | 417.063 | 489.392 | 491.075 | Up   |
| Sim2     | 4.88699 | 2.31721 | 1.17749 | 1.96793 | 0.04908  | NA       | 0       | 1.97286 | 2.92388 | 8.15772 | 10.303  | 5.96447 | Up   |
| Hlcs     | 1182.49 | 0.35027 | 0.1044  | 3.35498 | 0.00079  | 0.00916  | 1075.18 | 1061.4  | 982.424 | 1259.35 | 1351.75 | 1364.87 | Up   |
| Gm31323  | 47.8292 | -0.6735 | 0.32911 | -2.0464 | 0.04072  | 0.16655  | 52.8775 | 58.1993 | 65.3    | 31.6112 | 41.2119 | 37.775  | Down |
| Erg      | 3063.45 | 0.29957 | 0.12945 | 2.31415 | 0.02066  | 0.10452  | 2547.91 | 3083.58 | 2608.1  | 3126.45 | 3717.32 | 3297.36 | Up   |
| Hmgn1    | 10500.8 | -0.2098 | 0.07219 | -2.9055 | 0.00367  | 0.02986  | 11216.9 | 11261.1 | 11310.5 | 9768.87 | 9475.65 | 9971.6  | Down |
| Get1     | 1231.02 | -0.5227 | 0.14811 | -3.5294 | 0.00042  | 0.00559  | 1650.95 | 1255.72 | 1448.3  | 1002.38 | 928.299 | 1100.44 | Down |
| Lca5l    | 667.128 | -0.839  | 0.28908 | -2.9024 | 0.0037   | 0.03006  | 883.25  | 582.98  | 1101.33 | 525.153 | 324.544 | 585.512 | Down |
| Sh3bgr   | 139.849 | -0.7994 | 0.21322 | -3.749  | 0.00018  | 0.00292  | 188.988 | 152.897 | 191.027 | 101.971 | 96.8481 | 107.36  | Down |
| Mx2      | 395.75  | -0.5981 | 0.29458 | -2.0304 | 0.04232  | 0.17098  | 288.868 | 635.261 | 505.832 | 299.796 | 270.968 | 373.774 | Down |
| Gm10232  | 199.982 | -0.3883 | 0.16739 | -2.3197 | 0.02035  | 0.10351  | 227.177 | 224.906 | 228.063 | 172.332 | 183.393 | 164.023 | Down |
| Snx9     | 4298.58 | 0.2342  | 0.08419 | 2.78174 | 0.00541  | 0.03956  | 4089.19 | 3837.21 | 3924.82 | 4558.13 | 4836.22 | 4545.92 | Up   |
| Ppp1r2-p | 17.9136 | -2.0182 | 0.58477 | -3.4513 | 0.00056  | 0.00701  | 32.314  | 24.6607 | 29.2388 | 4.07886 | 8.24239 | 8.94671 | Down |
| Dynlt1b  | 499.725 | -0.9266 | 0.27827 | -3.33   | 0.00087  | 0.00981  | 613.966 | 558.319 | 792.372 | 491.503 | 294.665 | 247.526 | Down |
| Tmem181  | 2549.03 | -0.7856 | 0.17612 | -4.461  | 8.16E-06 | 0.00024  | 3474.25 | 2802.45 | 3402.42 | 2171.99 | 196.877 | 1475.21 | Down |
| Gm2808   | 16.4644 | -1.4589 | 0.62089 | -2.3497 | 0.01879  | 0.09806  | 17.6258 | 19.7286 | 35.0866 | 11.2169 | 6.18179 | 8.94671 | Down |
| Tmem181  | 18.9852 | -1.2004 | 0.51702 | -2.3217 | 0.02025  | 0.1031   | 28.3972 | 22.6879 | 28.2642 | 10.1971 | 14.4242 | 9.94079 | Down |
| Dynlt1f  | 1319.88 | -0.5034 | 0.19882 | -2.5318 | 0.01135  | 0.06776  | 1572.62 | 1211.34 | 1859.59 | 1203.26 | 899.451 | 1173.01 | Down |
| Sytl3    | 181.145 | -0.6773 | 0.26466 | -2.5591 | 0.01049  | 0.06419  | 202.697 | 178.544 | 287.515 | 123.386 | 162.727 | 167.999 | Down |
| 4933426B | 35.8043 | -0.9921 | 0.40785 | -2.4325 | 0.015    | 0.08344  | 49.9399 | 38.4708 | 54.5791 | 25.4929 | 17.5151 | 28.8283 | Down |
| Rsph3b   | 1630.7  | -0.5379 | 0.15998 | -3.3626 | 0.00077  | 0.00895  | 2081.81 | 1602.95 | 2109.09 | 1388.85 | 1160.12 | 1441.41 | Down |
| Rps6ka2  | 1921.72 | -0.4483 | 0.13967 | -3.2094 | 0.00133  | 0.01371  | 2480.35 | 1875.2  | 2298.17 | 1576.48 | 1577.39 | 1722.74 | Down |
| Fndc1    | 671.461 | -0.8572 | 0.20033 | -4.279  | 1.88E-05 | 0.00046  | 994.88  | 943.027 | 657.873 | 531.271 | 483.21  | 418.507 | Down |
| T2       | 1031.43 | -0.8627 | 0.29746 | -2.9004 | 0.00373  | 0.03016  | 1415.94 | 901.597 | 1675.38 | 922.842 | 463.634 | 809.18  | Down |
| T        | 23.6591 | -1.7619 | 0.60847 | -2.8957 | 0.00378  | 0.03051  | 53.8567 | 21.7015 | 34.112  | 10.1971 | 6.18179 | 15.9053 | Down |
| Gm7947   | 3.19844 | 5.1497  | 1.86921 | 2.75502 | 0.00587  | NA       | 0       | 0       | 0       | 9.17743 | 2.0606  | 7.95263 | Up   |
| Pacrg    | 1185.9  | -0.8101 | 0.25683 | -3.1541 | 0.00161  | 0.01584  | 1561.84 | 1193.58 | 1775.77 | 935.079 | 564.604 | 1084.54 | Down |
| Prkn     | 801.215 | -0.2574 | 0.128   | -2.0107 | 0.04436  | 0.17627  | 829.393 | 878.909 | 909.327 | 716.86  | 666.603 | 806.198 | Down |
| Slc22a3  | 319.315 | 0.7868  | 0.38987 | 2.0181  | 0.04358  | 0.17438  | 279.076 | 324.535 | 99.412  | 375.255 | 497.634 | 339.975 | Up   |
| Igf2r    | 4917.24 | 0.22622 | 0.0788  | 2.87092 | 0.00409  | 0.03216  | 4578.8  | 4446.82 | 4571.98 | 5153.64 | 5266.89 | 5485.33 | Up   |
| Acat2    | 3359.9  | 0.36451 | 0.11969 | 3.04538 | 0.00232  | 0.02117  | 2905.32 | 3128.95 | 2778.66 | 3772.95 | 4174.77 | 3398.75 | Up   |
| Dact2    | 338.044 | 0.40653 | 0.17396 | 2.33695 | 0.01944  | 0.1002   | 262.429 | 287.051 | 322.602 | 397.689 | 424.483 | 334.01  | Up   |
| Wdr27    | 652.091 | -1.0196 | 0.28553 | -3.571  | 0.00036  | 0.00494  | 971.379 | 551.414 | 1097.43 | 464.99  | 318.362 | 508.968 | Down |
| 4933401D | 3.77193 | -2.6889 | 1.34354 | -2.0014 | 0.04535  | NA       | 4.89606 | 6.90501 | 7.79702 | 2.03943 | 0       | 0.99408 | Down |
| BC002059 | 569.915 | 0.26758 | 0.13507 | 1.98109 | 0.04758  | 0.18499  | 469.043 | 547.468 | 535.07  | 654.657 | 635.694 | 577.56  | Up   |
| Zfp960   | 125.226 | 0.60696 | 0.26021 | 2.33259 | 0.01967  | 0.10099  | 112.609 | 79.9008 | 105.26  | 122.366 | 175.151 | 156.07  | Up   |
| Gbf712   | 301.884 | 0.39927 | 0.14395 | 2.77379 | 0.00554  | 0.04026  | 260.471 | 266.336 | 254.378 | 345.683 | 325.574 | 358.862 | Up   |
| Lnpep    | 6799.5  | 0.20506 | 0.10281 | 1.99463 | 0.04608  | 0.18094  | 5958.51 | 6585.4  | 6407.2  | 7000.34 | 7916.81 | 6928.73 | Up   |
| Fpr1     | 981.065 | 1.34056 | 0.32964 | 4.0667  | 4.77E-05 | 0.00101  | 687.407 | 690.501 | 288.49  | 1003.4  | 1633.02 | 1583.57 | Up   |
| Vmn2r97  | 10.4003 | 0.30239 | 1.28062 | 2.36134 | 0.01821  | 0.09612  | 0       | 0       | 6.82239 | 24.4732 | 8.24239 | 22.8638 | Up   |
| Zfp677   | 304.036 | 0.43068 | 0.15647 | 2.75251 | 0.00591  | 0.0423   | 243.824 | 248.58  | 284.591 | 333.447 | 339.998 | 373.774 | Up   |
| Zfp983   | 957.784 | -0.4287 | 0.14845 | -2.8878 | 0.00388  | 0.03105  | 1134.91 | 1170.89 | 991.196 | 855.541 | 895.329 | 698.837 | Down |
| Gm10509  | 76.246  | 0.65997 | 0.28164 | 2.34333 | 0.01911  | 0.0992   | 59.732  | 49.3215 | 68.2239 | 83.6166 | 106.121 | 90.4611 | Up   |
| Zfp995   | 393.242 | 0.5359  | 0.173   |         |          |          |         |         |         |         |         |         |      |

|           |         |         |         |         |          |          |         |         |         |         |         |         |      |
|-----------|---------|---------|---------|---------|----------|----------|---------|---------|---------|---------|---------|---------|------|
| Zfp946    | 1547.83 | 0.40419 | 0.12125 | 3.33344 | 0.00086  | 0.00974  | 1351.31 | 1202.46 | 1443.42 | 1641.74 | 1860.72 | 1787.35 | Up   |
| Zfp945    | 1288.14 | 0.47708 | 0.11038 | 4.32236 | 1.54E-05 | 0.0004   | 1036.99 | 1089.02 | 1105.23 | 1371.52 | 1575.33 | 1550.76 | Up   |
| Zfp40     | 689.965 | 0.7736  | 0.15869 | 4.87497 | 1.09E-06 | 4.28E-05 | 450.438 | 527.74  | 549.69  | 745.412 | 950.965 | 915.546 | Up   |
| Mmp25     | 119.171 | 0.74325 | 0.24681 | 3.01144 | 0.0026   | 0.02304  | 84.2123 | 80.8872 | 102.336 | 130.524 | 140.121 | 176.946 | Up   |
| Cldn6     | 3.91821 | -3.4186 | 1.57112 | -2.1759 | 0.02956  | NA       | 6.85449 | 3.94572 | 10.7209 | 0       | 0       | 1.98816 | Down |
| Pkmyt1    | 398.645 | 0.43514 | 0.18189 | 2.39233 | 0.01674  | 0.09065  | 301.598 | 326.508 | 388.876 | 489.463 | 387.392 | 498.033 | Up   |
| Paqr4     | 1147.33 | 0.57361 | 0.11373 | 5.04337 | 4.57E-07 | 2.07E-05 | 859.749 | 940.067 | 966.83  | 1445.96 | 1280.66 | 1390.72 | Up   |
| Kremen2   | 21.4517 | 2.65691 | 0.71682 | 3.70651 | 0.00021  | 0.00332  | 1.95843 | 4.93215 | 10.7209 | 40.7886 | 20.606  | 49.7039 | Up   |
| Srrm2     | 23381.8 | 0.27932 | 0.07667 | 3.64303 | 0.00027  | 0.00401  | 20887.6 | 20486.2 | 22002.2 | 25356.2 | 25353.6 | 26204.9 | Up   |
| Prss22    | 370.195 | -1.095  | 0.34255 | -3.1967 | 0.00139  | 0.01417  | 672.719 | 328.481 | 511.679 | 346.703 | 190.605 | 170.982 | Down |
| Kctd5     | 2129.61 | -0.2677 | 0.12171 | -2.1999 | 0.02782  | 0.12818  | 2562.6  | 2062.62 | 2354.7  | 2030.25 | 1863.81 | 1903.66 | Down |
| Amdhd2    | 1565.04 | 0.66519 | 0.13105 | 5.07578 | 3.86E-07 | 1.80E-05 | 1050.7  | 1301.1  | 1279.69 | 1807.95 | 2045.14 | 1905.65 | Up   |
| Atp6v0c   | 6536.52 | 0.96844 | 0.12385 | 7.81967 | 5.30E-15 | 1.39E-12 | 4145.99 | 4958.78 | 4159.71 | 7909.93 | 8743.11 | 9301.59 | Up   |
| Tbc1d24   | 734.255 | 1.01731 | 0.17958 | 5.66509 | 1.47E-08 | 1.04E-06 | 467.084 | 537.604 | 452.227 | 856.561 | 891.208 | 1200.85 | Up   |
| Ntn3      | 90.7227 | 1.10683 | 0.30342 | 3.64787 | 0.00026  | 0.00397  | 45.0438 | 75.9551 | 51.6552 | 114.208 | 113.333 | 144.141 | Up   |
| Abca17    | 521.659 | -1.6858 | 0.32105 | -5.2508 | 1.51E-07 | 7.98E-06 | 898.917 | 854.248 | 634.482 | 360.979 | 243.15  | 138.177 | Down |
| Abca3     | 15412.1 | 0.51046 | 0.15286 | 3.33939 | 0.00084  | 0.00957  | 14441.4 | 13633.4 | 10066   | 17803.2 | 18182.7 | 18345.7 | Up   |
| D330041f  | 191.727 | 0.973   | 0.18608 | 5.22899 | 1.70E-07 | 8.83E-06 | 119.464 | 146.978 | 121.828 | 265.126 | 252.423 | 244.543 | Up   |
| Rnps1     | 2025.06 | 0.87632 | 0.1741  | 5.03343 | 4.82E-07 | 2.16E-05 | 1527.57 | 1397.77 | 1359.61 | 2406.53 | 2189.38 | 3269.52 | Up   |
| Pkd1      | 4371.29 | 0.30304 | 0.08975 | 3.37628 | 0.00073  | 0.00861  | 3842.43 | 3825.37 | 4073.94 | 4712.1  | 4669.31 | 5104.59 | Up   |
| Npw       | 898.126 | -1.1167 | 0.18764 | -5.9515 | 2.66E-09 | 2.18E-07 | 1252.41 | 1216.27 | 1219.26 | 718.899 | 530.604 | 451.312 | Down |
| Gfer      | 931.352 | 0.51039 | 0.16787 | 3.04045 | 0.00236  | 0.02145  | 878.354 | 717.134 | 709.529 | 1107.41 | 923.147 | 1252.54 | Up   |
| Rps2      | 18139.9 | 0.29745 | 0.07354 | 4.04469 | 5.24E-05 | 0.00109  | 15989.6 | 16507.9 | 16331.8 | 20411.6 | 20254.6 | 19343.8 | Up   |
| Msrb1     | 2606.49 | 0.64991 | 0.16074 | 4.04318 | 5.27E-05 | 0.0011   | 2150.35 | 2071.5  | 1865.44 | 3043.85 | 3833.74 | 2674.07 | Up   |
| Igfals    | 136.512 | 1.31119 | 0.26389 | 4.96865 | 6.74E-07 | 2.86E-05 | 75.3994 | 89.7651 | 70.1732 | 170.292 | 166.908 | 246.531 | Up   |
| Jpt2      | 2363.15 | 0.40154 | 0.10887 | 3.68826 | 0.00023  | 0.00352  | 2146.43 | 1957.08 | 2005.78 | 2769.55 | 2450.05 | 2850.02 | Up   |
| Ift140    | 2486.8  | -0.5278 | 0.19175 | -2.7528 | 0.00591  | 0.04228  | 3195.17 | 2297.39 | 3317.63 | 2271.92 | 1654.66 | 2183.99 | Down |
| Cicn7     | 3300.31 | 0.40223 | 0.08724 | 4.61085 | 4.01E-06 | 0.00013  | 2725.15 | 2809.35 | 2995.03 | 3693.41 | 3819.32 | 3759.6  | Up   |
| Ccdc154   | 621.594 | -1.0998 | 0.23836 | -4.6142 | 3.95E-06 | 0.00013  | 872.479 | 653.016 | 1017.51 | 509.857 | 331.756 | 344.945 | Down |
| Gm38655   | 187.041 | -1.1498 | 0.29099 | -3.9514 | 7.77E-05 | 0.00151  | 285.93  | 194.327 | 293.363 | 149.898 | 82.4239 | 116.307 | Down |
| Gnptg     | 3059.64 | 0.22406 | 0.09474 | 2.36498 | 0.01803  | 0.09564  | 2729.07 | 3003.68 | 2734.8  | 3381.37 | 3356.71 | 3152.22 | Up   |
| Tsr3      | 936.296 | -0.2489 | 0.10476 | -2.3759 | 0.01751  | 0.0936   | 1060.49 | 971.633 | 1018.49 | 877.975 | 827.33  | 861.866 | Down |
| Baiap3    | 518.84  | -0.6219 | 0.22009 | -2.8258 | 0.00472  | 0.03585  | 533.671 | 704.311 | 649.102 | 409.925 | 308.059 | 507.974 | Down |
| Tpsb2     | 10.9808 | -3.2902 | 1.46609 | -2.2442 | 0.02482  | 0.11813  | 47.0022 | 7.89144 | 4.87314 | 6.11829 | 0       | 0       | Down |
| Tekt4     | 2094.62 | -1.1794 | 0.24302 | -4.8531 | 1.22E-06 | 4.71E-05 | 3153.07 | 2044.87 | 3520.35 | 1592.79 | 992.177 | 1264.47 | Down |
| Ccdc78    | 3019.06 | -0.77   | 0.27637 | -2.7862 | 0.00533  | 0.03916  | 4279.16 | 2626.86 | 4512.52 | 2680.83 | 1439.33 | 2575.66 | Down |
| Metrn     | 249.618 | -0.596  | 0.17315 | -3.442  | 0.00058  | 0.00722  | 333.912 | 263.377 | 304.084 | 197.825 | 194.726 | 203.786 | Down |
| Wdr90     | 1387.49 | -0.5442 | 0.20927 | -2.6003 | 0.00932  | 0.05857  | 1786.08 | 1248.82 | 1903.45 | 1224.68 | 898.42  | 1263.47 | Down |
| Mcrip2    | 370.477 | -0.4213 | 0.15113 | -2.7878 | 0.00531  | 0.03904  | 433.791 | 375.83  | 462.948 | 320.19  | 307.029 | 323.076 | Down |
| Mettl26   | 1490.38 | -0.2531 | 0.11017 | -2.2975 | 0.02159  | 0.10743  | 1593.18 | 1730.2  | 1538.94 | 1452.07 | 1344.54 | 1283.36 | Down |
| Gm16278   | 391.664 | -0.6404 | 0.14213 | -4.5059 | 6.61E-06 | 0.0002   | 485.69  | 457.703 | 488.288 | 283.481 | 299.817 | 335.004 | Down |
| Pigq      | 546.896 | 0.58392 | 0.15114 | 3.86336 | 0.00011  | 0.00203  | 465.126 | 407.395 | 440.532 | 584.297 | 742.845 | 641.181 | Up   |
| Capn15    | 297.055 | 0.60106 | 0.21077 | 2.85173 | 0.00435  | 0.03377  | 283.972 | 179.53  | 244.631 | 332.427 | 372.968 | 368.803 | Up   |
| Rab11fip3 | 930.907 | 0.31707 | 0.15741 | 2.01427 | 0.04398  | 0.17536  | 823.518 | 896.665 | 767.032 | 896.329 | 990.117 | 1211.78 | Up   |
| Decr2     | 1256.57 | 0.33477 | 0.12742 | 2.62735 | 0.00861  | 0.05541  | 1105.53 | 1137.35 | 1091.58 | 1329.71 | 1282.72 | 1592.51 | Up   |
| Mrpl28    | 1807.21 | -0.2547 | 0.10625 | -2.3975 | 0.01651  | 0.08972  | 1952.55 | 1978.78 | 1967.77 | 1785.52 | 1511.45 | 1647.19 | Down |
| Pdia2     | 571.079 | -1.0897 | 0.27646 | -3.9416 | 8.10E-05 | 0.00156  | 884.229 | 542.536 | 904.454 | 433.379 | 249.332 | 412.543 | Down |
| Arhgdig   | 2378    | -0.8989 | 0.24026 | -3.7415 | 0.00018  | 0.00298  | 3501.66 | 2153.38 | 3632.44 | 1765.13 | 1260.06 | 1955.35 | Down |
| Rgs11     | 1903.42 | -0.879  | 0.23148 | -3.7975 | 0.00015  | 0.00251  | 2291.36 | 1921.56 | 3185.08 | 1634.6  | 1049.87 | 1338.03 | Down |
| Fam234a   | 5203.19 | -0.2142 | 0.1001  | -2.14   | 0.03235  | 0.14246  | 5256.41 | 5736.09 | 5773.69 | 5156.7  | 4768.22 | 4528.03 | Down |
| Atp6v0e   | 6632.86 | 0.27665 | 0.11844 | 2.33575 | 0.0195   | 0.10044  | 5752.87 | 6460.13 | 5783.44 | 7232.84 | 8021.9  | 6546.01 | Up   |
| Syngap1   | 1758.97 | -0.6977 | 0.27365 | -2.5495 | 0.01079  | 0.06538  | 2561.62 | 1407.64 | 2559.37 | 1375.6  | 972.602 | 1677.01 | Down |
| Itrp3     | 3456.68 | 0.56353 | 0.11736 | 4.80169 | 1.57E-06 | 5.88E-05 | 2576.31 | 2658.43 | 3135.38 | 4122.71 | 3941.92 | 4305.35 | Up   |
| 9630028f  | 1598.72 | -1.5505 | 0.27473 | -5.6438 | 1.66E-08 | 1.15E-06 | 2420.61 | 1596.04 | 3134.4  | 1057.44 | 623.331 | 760.47  | Down |
| Gm49794   | 16.7722 | -2.6011 | 0.75903 | -3.4269 | 0.00061  | 0.00755  | 29.3764 | 39.4572 | 17.5433 | 9.17743 | 3.0909  | 1.98816 | Down |
| Hmga1     | 545.953 | 1.49341 | 0.22523 | 6.63045 | 3.35E-11 | 4.17E-09 | 270.263 | 297.902 | 290.439 | 674.032 | 663.512 | 1079.57 | Up   |
| Al413582  | 481.438 | 0.50709 | 0.13689 | 3.29314 | 0.00099  | 0.01093  | 393.644 | 437.975 | 388.876 | 515.976 | 594.482 | 557.678 | Up   |
| Snrpc     | 1493.76 | -0.3015 | 0.11059 | -2.7262 | 0.00641  | 0.04472  | 1654.87 | 1587.17 | 1705.6  | 1407.21 | 1391.93 | 1215.76 | Down |
| Uhrf1bp1  | 1279.87 | 0.7123  | 0.20769 | 3.4296  | 0.0006   | 0.00749  | 1031.11 | 852.275 | 1027.26 | 1471.45 | 1237.39 | 2059.73 | Up   |
| Tcp11     | 989.077 | -0.5507 | 0.24301 | -2.2663 | 0.02343  | 0.11352  | 1311.17 | 846.357 | 1369.35 | 908.566 | 592.422 | 906.6   | Down |
| Slc26a8   | 82.5344 | -0.7139 | 0.30862 | -2.3131 | 0.02072  | 0.10474  | 79.3162 | 104.562 | 123.778 | 74.4392 | 50.4846 | 62.6269 | Down |
| Mapk13    | 2789.9  | 0.35879 | 0.09065 | 3.95793 | 7.56E-05 | 0.00148  | 2470.55 | 2400.97 | 2462.88 | 3069.34 | 3008.47 | 3327.18 | Up   |
| Pxt1      | 2.93525 | -4.9755 | 1.93272 | -2.5743 | 0.01004  | NA       | 1.95843 | 4.93215 | 10.7209 | 0       | 0       | 0       | Down |
| Stk38     | 8395.3  | 0.43743 | 0.10627 | 4.11599 | 3.86E-05 | 0.00084  | 6851.55 | 6732.38 | 7812.61 | 9442.56 | 10265.9 | 9266.8  | Up   |
| Cdkn1a    | 7896.04 | -0.7075 | 0.20955 | -3.3765 | 0.00073  | 0.00861  | 13138.1 | 8786.13 | 7458.82 | 6515.98 | 5699.61 | 5777.58 | Down |
| Rab44     | 1166.24 | 1.11082 | 0.22488 | 4.9397  | 7.82E-07 | 3.23E-05 | 889.125 | 813.804 | 511.679 | 1561.18 | 1833.93 | 1387.73 | Up   |
| Pi16      | 607.046 | -0.8399 | 0.18891 | -4.4461 | 8.75E-06 | 0.00025  | 894.021 | 671.759 | 770.93  | 525.153 | 397.695 | 382.72  | Down |
| Gm36486   | 67.4049 | 1.13473 | 0.40507 | 2.80127 | 0.00509  | 0.03791  | 34.2724 | 54.2536 | 38.0105 | 67.3012 | 137.03  | 73.5618 | Up   |
| Pim1      | 2245.56 | 0.70172 | 0.2463  | 2.84908 | 0.00438  | 0.03393  | 1706.77 | 2300.35 | 1122.77 | 2735.9  | 3137.26 | 2470.29 | Up   |
| Mdga1     | 157.07  | 1.59562 | 0.26555 | 6.00864 | 1.87E-09 | 1.58E-07 | 73.441  | 81.8737 | 78.9448 | 221.278 | 304.968 | 181.916 | Up   |
| Gm50252   | 20.8183 | 1.6998  | 0.52379 | 3.24516 | 0.00117  | 0.01249  | 6.85449 | 9.8643  | 12.6702 | 33.6506 | 35.0301 | 26.8401 | Up   |
| Abcg1     | 5523.04 | 0.8603  | 0.18767 | 4.58414 | 4.56E-06 | 0.00014  | 4185.16 | 4528.7  | 3056.43 | 6922.84 | 8346.45 | 6098.67 | Up   |
| Rsph1     | 3621.05 | -0.9905 | 0.29832 | -3.3204 | 0.0009   | 0.01008  | 5896.82 | 3053    | 5502.75 | 2711.42 | 1541.33 | 3021    | Down |
| Slc37a1   | 4234.62 | 0.32476 | 0.11605 | 2.79829 | 0.00514  | 0.03814  | 3557.48 | 3861.87 | 3860.5  | 4744.73 | 5175.19 | 4207.93 | Up   |
| Gm38099   | 26.1005 | -1.0619 | 0.44904 | -2.3648 | 0.01804  | 0.09565  | 36.2309 | 38.4708 | 31.1881 | 21.414  | 13.3939 | 15.9053 | Down |
| Sik1      | 6295.51 | 0.30028 | 0.15057 | 1.99428 | 0.04612  | 0.181    | 5643.2  | 6070.49 | 5214.26 | 7896.67 | 7254.33 | 5694.08 | Up   |
| Notch3    | 496.353 | 0.59193 | 0.14586 | 4.05816 | 4.95E-05 | 0.00104  | 3       |         |         |         |         |         |      |

|          |         |         |         |         |          |          |         |         |         |         |         |         |      |
|----------|---------|---------|---------|---------|----------|----------|---------|---------|---------|---------|---------|---------|------|
| Cyp4f14  | 21.5308 | -1.8956 | 0.65745 | -2.8833 | 0.00394  | 0.03132  | 36.2309 | 24.6607 | 40.9343 | 16.3154 | 3.0909  | 7.95263 | Down |
| Zfp472   | 627.928 | 0.38384 | 0.11305 | 3.39543 | 0.00069  | 0.00819  | 521.92  | 548.455 | 564.309 | 715.84  | 692.361 | 724.683 | Up   |
| Morc2b   | 22.7968 | 2.75771 | 0.62283 | 4.42769 | 9.52E-06 | 0.00027  | 5.87528 | 3.94572 | 7.79702 | 26.5126 | 33.9998 | 58.6506 | Up   |
| Zfp955b  | 752.543 | -0.2929 | 0.11888 | -2.4635 | 0.01376  | 0.07828  | 850.936 | 795.062 | 840.129 | 661.795 | 635.694 | 731.642 | Down |
| Zfp101   | 684.552 | 0.34464 | 0.16155 | 2.13336 | 0.03289  | 0.14419  | 561.089 | 655.976 | 592.573 | 652.618 | 759.33  | 885.724 | Up   |
| Myo1f    | 2374.15 | 0.95841 | 0.22392 | 4.28005 | 1.87E-05 | 0.00046  | 1378.73 | 2150.42 | 1310.87 | 2781.78 | 3777.07 | 2846.05 | Up   |
| Gm17251  | 116.504 | -0.5278 | 0.22946 | -2.3001 | 0.02144  | 0.10703  | 120.443 | 152.897 | 139.372 | 104.011 | 95.8178 | 86.4848 | Down |
| BC051226 | 164.06  | -0.4439 | 0.20627 | -2.1519 | 0.0314   | 0.1392   | 208.572 | 165.72  | 192.976 | 156.016 | 130.848 | 130.224 | Down |
| H2-DMb1  | 3970.96 | 0.40912 | 0.13819 | 2.96055 | 0.00307  | 0.02617  | 3117.81 | 3717.85 | 3399.5  | 4202.25 | 4164.47 | 5223.88 | Up   |
| H2-Ab1   | 25553.4 | 0.27726 | 0.11416 | 2.42869 | 0.01515  | 0.084    | 20472.4 | 24167.5 | 24676.6 | 26962.3 | 27184.4 | 29857.1 | Up   |
| H2-Aa    | 36890.7 | 0.40168 | 0.15677 | 2.56221 | 0.0104   | 0.0637   | 28452   | 35280.6 | 31631.5 | 38329   | 37293.7 | 50357   | Up   |
| H2-Eb1   | 14366.8 | 0.6097  | 0.24462 | 2.49245 | 0.01269  | 0.07351  | 9970.34 | 12126.2 | 12029.8 | 13341.9 | 13718.4 | 25014   | Up   |
| Btnl4    | 31.866  | 1.42477 | 0.5123  | 2.78109 | 0.00542  | 0.0396   | 18.605  | 9.8643  | 23.3911 | 63.2223 | 44.3028 | 31.8105 | Up   |
| Btnl6    | 9.15564 | 4.75314 | 1.29682 | 3.66522 | 0.00025  | 0.00377  | 0       | 1.97286 | 0       | 17.3352 | 23.6969 | 11.9289 | Up   |
| Gpsm3    | 466.699 | 0.41238 | 0.19804 | 2.08224 | 0.03732  | 0.15736  | 359.371 | 475.459 | 366.46  | 519.035 | 630.543 | 449.323 | Up   |
| Agpat1   | 3609.73 | 0.22837 | 0.08462 | 2.69893 | 0.00696  | 0.04732  | 3459.56 | 3251.27 | 3263.05 | 3760.71 | 3958.41 | 3965.38 | Up   |
| C4b      | 21033.2 | 0.56331 | 0.1714  | 3.28651 | 0.00101  | 0.01111  | 14888.9 | 21473.6 | 14572.6 | 25610.1 | 23522.7 | 26131.3 | Up   |
| Ehmt2    | 7826.34 | 0.26306 | 0.11729 | 2.24285 | 0.02491  | 0.11851  | 6892.68 | 7223.62 | 7227.84 | 9131.55 | 9063.54 | 7418.81 | Up   |
| Slc44a4  | 4487.74 | 0.59608 | 0.22517 | 2.64719 | 0.00812  | 0.05308  | 4261.53 | 2312.19 | 4147.04 | 5620.67 | 5119.55 | 5465.44 | Up   |
| Neu1     | 4078.94 | 0.70216 | 0.16247 | 4.32169 | 1.55E-05 | 0.0004   | 2893.57 | 3417.98 | 3004.78 | 5182.19 | 5897.43 | 4077.71 | Up   |
| Hspa1b   | 1306.12 | -1.744  | 0.78145 | -2.2317 | 0.02563  | 0.12096  | 1703.83 | 569.17  | 3762.06 | 550.646 | 381.21  | 869.819 | Down |
| Hspa1a   | 275.886 | -2.05   | 0.90224 | -2.2721 | 0.02308  | 0.11232  | 268.304 | 145.992 | 919.074 | 76.4786 | 54.6058 | 190.863 | Down |
| Vars     | 4136.06 | 0.34376 | 0.15944 | 2.15602 | 0.03108  | 0.13833  | 3650.51 | 3355.83 | 3930.67 | 4129.85 | 4117.07 | 5632.45 | Up   |
| Vwa7     | 229.538 | 0.34982 | 0.16154 | 2.16544 | 0.03035  | 0.13621  | 202.697 | 190.381 | 212.469 | 246.771 | 255.514 | 269.395 | Up   |
| Clic1    | 14664.7 | 0.38135 | 0.08722 | 4.372   | 1.23E-05 | 0.00033  | 13471   | 12659.8 | 12082.5 | 17096.5 | 16604.3 | 16074.2 | Up   |
| Mpig6b   | 150.49  | -1.2879 | 0.275   | -4.6833 | 2.82E-06 | 9.60E-05 | 162.549 | 207.15  | 270.946 | 89.7349 | 73.1512 | 99.4079 | Down |
| Ly6g6c   | 87.9173 | -0.6627 | 0.30691 | -2.1594 | 0.03082  | 0.13751  | 95.9628 | 96.6701 | 130.6   | 86.6758 | 64.9088 | 52.6862 | Down |
| Aif1     | 383.623 | 0.49271 | 0.19038 | 2.588   | 0.00965  | 0.06019  | 278.096 | 393.585 | 284.591 | 418.083 | 478.058 | 449.323 | Up   |
| Tnf      | 238.696 | 0.48761 | 0.21647 | 2.25256 | 0.02429  | 0.11641  | 193.884 | 230.825 | 171.534 | 226.377 | 316.302 | 293.253 | Up   |
| H2-Q6    | 14076.3 | -0.4836 | 0.16958 | -2.8515 | 0.00435  | 0.03377  | 13251.7 | 18734.3 | 17254.8 | 10357.2 | 11342.6 | 13517.5 | Down |
| H2-Q7    | 8523.95 | -0.5557 | 0.17224 | -3.2265 | 0.00125  | 0.01314  | 8726.74 | 11622.1 | 10088.4 | 6126.45 | 6217.85 | 8362.19 | Down |
| Psors1c2 | 7.86849 | -2.508  | 1.01288 | -2.4761 | 0.01328  | 0.07613  | 11.7506 | 13.81   | 14.6194 | 0       | 2.0606  | 4.97039 | Down |
| Cdsn     | 151.691 | 1.93993 | 0.25465 | 7.61802 | 2.58E-14 | 5.87E-12 | 57.7736 | 60.1722 | 70.1732 | 236.574 | 292.605 | 192.851 | Up   |
| 2300002N | 72.1961 | 6.77485 | 0.96592 | 7.0139  | 2.32E-12 | 3.51E-10 | 3.91685 | 0       | 0       | 173.352 | 210.181 | 45.7276 | Up   |
| Sfta2    | 1936.5  | -0.4799 | 0.16174 | -2.9672 | 0.00301  | 0.02573  | 2670.31 | 2225.39 | 1871.28 | 1775.32 | 1527.93 | 1548.77 | Down |
| Gm20483  | 28.5427 | 0.89802 | 0.42612 | 2.10744 | 0.03508  | 0.15086  | 17.6258 | 24.6607 | 17.5433 | 33.6506 | 35.0301 | 42.7454 | Up   |
| Vars2    | 644.892 | 0.81485 | 0.12528 | 6.50445 | 7.80E-11 | 8.73E-09 | 436.729 | 476.446 | 489.263 | 770.904 | 823.208 | 872.801 | Up   |
| Gm20442  | 13.9764 | -2.2873 | 0.82576 | -2.77   | 0.00561  | 0.04065  | 17.6258 | 24.6607 | 27.2896 | 10.1971 | 3.0909  | 0.99408 | Down |
| Tubb5    | 13889   | 0.39896 | 0.11026 | 3.61838 | 0.0003   | 0.00433  | 12009.1 | 12716.1 | 11217   | 16379.7 | 16768.1 | 14244.2 | Up   |
| Mdc1     | 1785.06 | 0.262   | 0.11709 | 2.23767 | 0.02524  | 0.1195   | 1574.57 | 1503.32 | 1792.34 | 1836.51 | 1963.75 | 2039.85 | Up   |
| Ppp1r18  | 2130.62 | 0.37483 | 0.12061 | 3.10787 | 0.00188  | 0.01787  | 1865.4  | 2044.87 | 1655.89 | 2362.68 | 2539.69 | 2315.21 | Down |
| Gm20508  | 15.6426 | -2.0394 | 0.76328 | -2.6719 | 0.00754  | 0.05018  | 18.605  | 26.6336 | 30.2134 | 10.1971 | 7.21209 | 0.99408 | Down |
| A930015C | 1525.93 | -1.0703 | 0.23592 | -4.5366 | 5.72E-06 | 0.00017  | 1461.96 | 2394.06 | 2345.93 | 780.082 | 1201.33 | 972.209 | Down |
| H2-T22   | 2936.31 | 0.763   | 0.24316 | 3.13792 | 0.0017   | 0.01657  | 1713.62 | 2303.31 | 2515.51 | 2954.11 | 3046.59 | 5084.71 | Up   |
| Gm6034   | 58.9209 | -0.7472 | 0.31869 | -2.3446 | 0.01905  | 0.09891  | 58.7528 | 81.8737 | 80.8941 | 39.7689 | 50.4846 | 41.7513 | Down |
| Gm8810   | 29.7928 | -4.21   | 0.66415 | -6.3389 | 2.31E-10 | 2.34E-08 | 51.8983 | 56.2265 | 61.4015 | 4.07886 | 5.15149 | 0       | Down |
| Gm19684  | 1.96259 | -4.3943 | 2.07674 | -2.116  | 0.03435  | NA       | 1.95843 | 5.91858 | 3.89851 | 0       | 0       | 0       | Down |
| Gm9574   | 26.0329 | 2.04873 | 0.5591  | 3.66437 | 0.00025  | 0.00378  | 4.89606 | 14.7964 | 10.7209 | 29.5717 | 50.4846 | 45.7276 | Up   |
| Trim31   | 49.0108 | 1.33741 | 0.6014  | 2.22383 | 0.02616  | 0.12275  | 25.4595 | 32.5522 | 25.3403 | 77.4983 | 113.333 | 19.8816 | Up   |
| Ppp1r11  | 2406.97 | -0.2136 | 0.10446 | -2.0444 | 0.04091  | 0.16717  | 2738.86 | 2607.13 | 2408.3  | 2299.46 | 2296.54 | 2091.54 | Down |
| Znrd1    | 1188.01 | -0.316  | 0.12482 | -2.5319 | 0.01135  | 0.06776  | 1325.85 | 1320.83 | 1306    | 1176.75 | 1061.21 | 937.416 | Down |
| H2-M6-p  | 20.6242 | -1.308  | 0.5738  | -2.2796 | 0.02263  | 0.11067  | 39.1685 | 17.7557 | 31.1881 | 13.2563 | 14.4242 | 7.95263 | Down |
| 2410137N | 12.012  | -1.9013 | 0.65723 | -2.8929 | 0.00382  | 0.03073  | 18.605  | 19.7286 | 18.5179 | 5.09857 | 5.15149 | 4.97039 | Down |
| H2-M5    | 184.598 | -1.3531 | 0.19374 | -6.9843 | 2.86E-12 | 4.10E-10 | 244.803 | 286.065 | 265.099 | 94.8335 | 115.393 | 101.396 | Down |
| Mog      | 39.053  | -0.8569 | 0.38158 | -2.2458 | 0.02472  | 0.11776  | 58.7528 | 46.3622 | 45.8075 | 31.6112 | 30.909  | 20.8756 | Down |
| Ubd      | 21.7337 | -1.3645 | 0.56581 | -2.4117 | 0.01588  | 0.08705  | 30.3556 | 18.7422 | 44.8329 | 14.276  | 9.27269 | 12.923  | Down |
| H2-M2    | 253.757 | 2.64642 | 0.30187 | 8.76672 | 1.84E-18 | 8.09E-16 | 50.9191 | 74.9687 | 83.8179 | 421.142 | 311.15  | 580.542 | Up   |
| CT010467 | 1145.06 | -0.6542 | 0.30659 | -2.1338 | 0.03286  | 0.14414  | 897.938 | 1540.8  | 1762.13 | 818.831 | 1235.33 | 615.335 | Down |
| Rhag     | 11.3578 | 1.62907 | 0.72642 | 2.2426  | 0.02492  | 0.11856  | 6.85449 | 4.93215 | 4.87314 | 11.2169 | 14.4242 | 25.846  | Up   |
| Gm20574  | 13.9037 | 1.43267 | 0.67753 | 2.11455 | 0.03447  | 0.14899  | 3.91685 | 9.8643  | 8.77165 | 28.552  | 14.4242 | 17.8934 | Up   |
| 9130008F | 122.609 | 1.07167 | 0.2575  | 4.16186 | 3.16E-05 | 0.00072  | 66.5865 | 85.8194 | 84.7926 | 133.583 | 171.03  | 193.845 | Up   |
| Cd2ap    | 6862.82 | 0.41781 | 0.09575 | 4.3634  | 1.28E-05 | 0.00034  | 5670.62 | 5999.46 | 5957.9  | 7244.05 | 8002.33 | 8302.54 | Up   |
| Adgrf1   | 5.38497 | 2.48201 | 1.14797 | 2.16208 | 0.03061  | NA       | 0       | 2.95929 | 1.94925 | 12.2366 | 7.21209 | 7.95263 | Up   |
| Adgrf5   | 44891.9 | 0.30126 | 0.12014 | 2.50758 | 0.01216  | 0.07127  | 39890.2 | 44467.3 | 36307.8 | 45574.1 | 53285   | 49827.2 | Up   |
| Ankrd66  | 1114.85 | -0.771  | 0.36851 | -2.0921 | 0.03643  | 0.15504  | 1504.07 | 912.447 | 1801.11 | 802.516 | 421.392 | 1247.57 | Down |
| Pla2g7   | 1354.14 | 0.56325 | 0.27896 | 2.01912 | 0.04347  | 0.1741   | 941.023 | 1476.69 | 861.571 | 1808.97 | 1969.93 | 1066.65 | Up   |
| Rcan2    | 2069.12 | -0.4603 | 0.13525 | -3.4031 | 0.00067  | 0.00802  | 2048.51 | 2561.76 | 2578.86 | 1768.19 | 1837.02 | 1620.35 | Down |
| Clic5    | 44391.7 | 0.26555 | 0.11091 | 2.39439 | 0.01665  | 0.09027  | 35511.2 | 43340.8 | 42101   | 47301.5 | 50049.8 | 48045.8 | Up   |
| Runx2    | 579.184 | 0.54424 | 0.18081 | 3.00995 | 0.00261  | 0.0231   | 413.228 | 518.862 | 481.466 | 698.505 | 796.421 | 566.625 | Up   |
| Supt3    | 605.169 | -0.3506 | 0.1604  | -2.1859 | 0.02882  | 0.13155  | 633.551 | 636.247 | 765.082 | 538.409 | 594.482 | 463.241 | Down |
| Spats1   | 72.7325 | -1.1143 | 0.40658 | -2.7408 | 0.00613  | 0.04344  | 133.173 | 52.2808 | 113.057 | 47.9266 | 42.2422 | 47.7158 | Down |
| Tcte1    | 1001.56 | -0.9628 | 0.34058 | -2.8268 | 0.0047   | 0.03578  | 1608.85 | 845.37  | 1517.49 | 730.116 | 376.059 | 931.452 | Down |
| Tmem151  | 18.2517 | -1.3239 | 0.67504 | -1.9612 | 0.04985  | 0.19052  | 23.5011 | 17.7557 | 37.0358 | 10.1971 | 4.12119 | 16.8993 | Down |
| Nfkbie   | 881.361 | 0.96424 | 0.12826 | 7.51775 | 5.57E-14 | 1.18E-11 | 542.484 | 657.949 | 591.599 | 1227.74 | 1100.36 | 1168.04 | Up   |
| F630040K | 40.5536 | -1.7126 | 0.42949 | -3.9877 | 6.67E-05 | 0.00133  | 58.7528 | 80.8872 | 46.7821 | 24.4732 | 17.5151 | 14.9112 | Down |
| Rsph9    | 2104.33 | -0.5862 | 0.23528 | -2.4915 | 0.01272  | 0.07366  | 2715.36 | 1997.52 | 2865.4  | 1978.25 | 1151.87 | 1917.58 | Down |
| Polh     | 457.251 | 0.50538 | 0.16838 | 3.00146 | 0.00269  | 0.02361  | 316.286 | 405.423 | 412.267 | 495.581 |         |         |      |

|           |         |         |         |         |          |          |         |         |         |         |         |         |      |
|-----------|---------|---------|---------|---------|----------|----------|---------|---------|---------|---------|---------|---------|------|
| Guca1b    | 37.5911 | 5.82274 | 0.91174 | 6.38638 | 1.70E-10 | 1.77E-08 | 1.95843 | 0       | 1.94925 | 55.0646 | 44.3028 | 122.272 | Up   |
| Gm20517   | 48.6322 | -0.777  | 0.35813 | -2.1697 | 0.03003  | 0.13517  | 77.3578 | 56.2265 | 50.6806 | 29.5717 | 40.1816 | 37.775  | Down |
| Frs3      | 337.724 | -0.4898 | 0.16543 | -2.9611 | 0.00307  | 0.02615  | 384.831 | 377.803 | 421.039 | 266.146 | 253.453 | 323.076 | Down |
| Foxp4     | 4126.01 | -0.2168 | 0.08526 | -2.5427 | 0.011    | 0.06625  | 4509.27 | 4226.85 | 4570.03 | 3876.96 | 3874.95 | 3697.97 | Down |
| Trem1     | 484.963 | 1.31646 | 0.38347 | 3.43306 | 0.0006   | 0.00741  | 374.059 | 284.092 | 175.433 | 736.234 | 988.056 | 351.904 | Up   |
| B430306N  | 222.734 | 1.87572 | 0.42971 | 4.36503 | 1.27E-05 | 0.00034  | 98.9005 | 90.7515 | 96.4881 | 381.373 | 533.695 | 135.195 | Up   |
| Trem2     | 758.295 | 1.11042 | 0.23124 | 4.80203 | 1.57E-06 | 5.88E-05 | 465.126 | 608.627 | 366.46  | 1052.35 | 1229.15 | 828.067 | Up   |
| Trem11    | 118.141 | -1.374  | 0.33145 | -4.1452 | 3.39E-05 | 0.00076  | 125.339 | 172.625 | 213.443 | 57.104  | 89.636  | 50.698  | Down |
| NfyA      | 2623.29 | 0.24965 | 0.10153 | 2.4588  | 0.01394  | 0.07903  | 2520.49 | 2435.49 | 2234.82 | 2758.33 | 2774.59 | 3016.03 | Up   |
| Gm49893   | 16.7309 | 1.41221 | 0.64178 | 2.20045 | 0.02778  | 0.12807  | 13.709  | 4.93215 | 8.77165 | 15.2957 | 28.8484 | 28.8283 | Up   |
| Unc5cl    | 373.93  | -0.9869 | 0.36149 | -2.73   | 0.00633  | 0.04437  | 614.946 | 249.567 | 626.685 | 301.836 | 176.181 | 274.366 | Down |
| Mocs1     | 2354.64 | 0.35849 | 0.1134  | 3.16139 | 0.00157  | 0.01557  | 2118.04 | 1999.49 | 2073.03 | 2631.88 | 2911.62 | 2393.74 | Up   |
| Kif6      | 791.58  | -0.7655 | 0.31469 | -2.4326 | 0.01499  | 0.08343  | 1094.76 | 658.935 | 1236.8  | 621.006 | 360.604 | 777.369 | Down |
| Rftn1     | 2056.25 | 0.54214 | 0.15551 | 3.48614 | 0.00049  | 0.00635  | 1464.9  | 2034.02 | 1524.32 | 2466.69 | 2331.57 | 2516.01 | Up   |
| Plcl2     | 693.943 | 0.75539 | 0.212   | 3.56325 | 0.00037  | 0.00505  | 411.269 | 675.704 | 461.973 | 836.166 | 965.39  | 813.156 | Up   |
| Gm37266   | 2.12852 | -4.5113 | 2.04612 | -2.2048 | 0.02747  | NA       | 3.91685 | 6.90501 | 1.94925 | 0       | 0       | 0       | Down |
| Sgo1      | 77.7868 | 0.7198  | 0.30876 | 2.33122 | 0.01974  | 0.1013   | 70.5033 | 50.3079 | 55.5538 | 88.7152 | 80.3633 | 121.278 | Up   |
| Stap2     | 3161.36 | 0.28197 | 0.09254 | 3.04699 | 0.00231  | 0.02111  | 2713.4  | 2924.76 | 2921.93 | 3546.57 | 3573.08 | 3288.41 | Up   |
| Plin4     | 435.431 | -1.2915 | 0.47871 | -2.6978 | 0.00698  | 0.04744  | 1131.97 | 219.974 | 502.908 | 196.805 | 233.878 | 327.052 | Down |
| Plin5     | 561.675 | -0.7218 | 0.27438 | -2.6308 | 0.00852  | 0.05509  | 829.393 | 463.622 | 805.042 | 455.813 | 312.18  | 503.998 | Down |
| Lrg1      | 45986.3 | 1.39901 | 0.1171  | 11.9474 | 6.70E-33 | 1.41E-29 | 23564.8 | 26167   | 26127.8 | 65374.9 | 74412.3 | 60271   | Up   |
| Sema6b    | 812.28  | 0.33581 | 0.15886 | 2.11393 | 0.03452  | 0.14917  | 728.534 | 646.111 | 779.702 | 897.349 | 1041.63 | 780.352 | Up   |
| TnfaiP811 | 183.631 | 0.47315 | 0.22395 | 2.11278 | 0.03462  | 0.1494   | 180.175 | 118.372 | 162.763 | 227.396 | 213.272 | 199.81  | Up   |
| Gm20219   | 563.911 | -0.4751 | 0.19397 | -2.4492 | 0.01432  | 0.08079  | 604.174 | 579.034 | 784.575 | 552.685 | 399.756 | 463.241 | Down |
| Vmac      | 1833.31 | 0.27011 | 0.11939 | 2.26243 | 0.02367  | 0.11424  | 1525.61 | 1795.3  | 1665.64 | 2176.07 | 1954.48 | 1882.78 | Up   |
| Rfx2      | 2141.5  | -0.5563 | 0.17241 | -3.2265 | 0.00125  | 0.01314  | 2783.9  | 2106.03 | 2758.2  | 1749.83 | 1459.93 | 1991.14 | Down |
| Slc25a41  | 10.0509 | -1.6946 | 0.72263 | -2.345  | 0.01903  | 0.0989   | 14.6882 | 14.7964 | 16.5687 | 6.11829 | 5.15149 | 2.98224 | Down |
| Dennd1c   | 1513.02 | 0.37922 | 0.10737 | 3.53178 | 0.00041  | 0.00557  | 1262.21 | 1434.27 | 1249.47 | 1680.49 | 1760.78 | 1690.93 | Up   |
| Tubb4a    | 850.725 | -0.3487 | 0.16821 | -2.073  | 0.03817  | 0.15996  | 890.104 | 902.583 | 1066.24 | 786.2   | 845.875 | 613.346 | Down |
| Gm11110   | 126.068 | 0.61955 | 0.30206 | 2.05106 | 0.04026  | 0.16559  | 112.609 | 117.385 | 68.2239 | 128.484 | 188.545 | 141.159 | Up   |
| Tnfsf14   | 142.735 | 0.53343 | 0.24545 | 2.17326 | 0.02976  | 0.13438  | 140.027 | 116.399 | 93.5642 | 157.036 | 154.545 | 194.839 | Up   |
| C3        | 37345.9 | 0.54003 | 0.1487  | 3.63182 | 0.00028  | 0.00416  | 28249.3 | 31006.4 | 32054.5 | 44923.5 | 36453   | 51388.9 | Up   |
| Vav1      | 1259.97 | 0.96523 | 0.17212 | 5.60797 | 2.05E-08 | 1.38E-06 | 753.994 | 1028.85 | 777.753 | 1572.4  | 1901.93 | 1524.92 | Up   |
| Adgre1    | 2234.14 | 1.12602 | 0.21422 | 5.25649 | 1.47E-07 | 7.76E-06 | 1335.65 | 1815.03 | 1061.37 | 2568.66 | 3382.47 | 3241.69 | Up   |
| Man2a1    | 5705.8  | 0.4919  | 0.09888 | 4.97488 | 6.53E-07 | 2.79E-05 | 4527.88 | 4864.08 | 4835.13 | 6378.32 | 7226.51 | 6402.86 | Up   |
| Tmem232   | 1995.81 | -1.2619 | 0.36023 | -3.5029 | 0.00046  | 0.00603  | 3632.88 | 1587.17 | 3230.89 | 1216.52 | 655.27  | 1652.16 | Down |
| Ankrd12   | 4851.63 | 0.34119 | 0.1415  | 2.41117 | 0.0159   | 0.08712  | 3712.2  | 4086.78 | 5042.72 | 5630.87 | 5501.79 | 5135.41 | Up   |
| Themis3   | 43.357  | 1.23986 | 0.37409 | 3.31438 | 0.00092  | 0.01026  | 21.5427 | 21.7015 | 34.112  | 58.1237 | 67.9997 | 56.6625 | Up   |
| Dlgap1    | 77.2333 | -1.0065 | 0.32334 | -3.1128 | 0.00185  | 0.01764  | 120.443 | 72.9958 | 115.981 | 54.0449 | 43.2725 | 56.6625 | Down |
| Myl12a    | 75.0321 | 0.5414  | 0.2733  | 1.98099 | 0.04759  | 0.185    | 67.5657 | 66.0908 | 49.706  | 84.6363 | 92.7269 | 89.4671 | Up   |
| Myom1     | 777.068 | -0.6123 | 0.18192 | -3.3655 | 0.00076  | 0.0089   | 1058.53 | 717.134 | 1042.85 | 618.967 | 628.482 | 596.447 | Down |
| 1600022D  | 152.362 | 1.44916 | 0.61153 | 2.36974 | 0.0178   | 0.0948   | 10.7713 | 7.89144 | 5.84776 | 28.552  | 16.4848 | 21.8697 | Up   |
| Emilin2   | 872.835 | 0.60212 | 0.24911 | 2.41712 | 0.01564  | 0.08614  | 713.846 | 859.18  | 506.806 | 1067.64 | 1300.24 | 789.298 | Up   |
| Togaram2  | 4151    | -0.815  | 0.22818 | -3.5718 | 0.00035  | 0.00493  | 6292.42 | 4001.94 | 5585.59 | 2869.48 | 2325.38 | 3831.18 | Down |
| Ypel5     | 4244.81 | 0.31686 | 0.0975  | 3.24974 | 0.00116  | 0.01236  | 3539.85 | 3804.66 | 3996.95 | 4735.56 | 4914.52 | 4477.33 | Up   |
| Ehd3      | 3095.46 | 1.15963 | 0.20575 | 5.63613 | 1.74E-08 | 1.20E-06 | 1558.91 | 2043.88 | 2140.28 | 3712.78 | 3625.62 | 5491.29 | Up   |
| Gm4948    | 23.9351 | 1.08364 | 0.51698 | 2.0961  | 0.03607  | 0.15402  | 19.5843 | 9.8643  | 16.5687 | 25.4929 | 43.2725 | 28.8283 | Up   |
| Xdh       | 16836.5 | 0.52629 | 0.22107 | 2.38068 | 0.01728  | 0.09285  | 11140.5 | 11290.7 | 18966.2 | 19114.6 | 22461.5 | 18045.5 | Up   |
| Dpy30     | 2141.6  | -0.4704 | 0.1584  | -2.97   | 0.00298  | 0.02554  | 2675.21 | 2177.05 | 2611.03 | 1890.55 | 1487.75 | 2008.04 | Down |
| Nlrc4     | 327.092 | 0.66396 | 0.15171 | 4.3766  | 1.21E-05 | 0.00032  | 239.907 | 247.594 | 271.921 | 399.728 | 372.968 | 430.436 | Up   |
| Crim1     | 1104.82 | 0.39923 | 0.18763 | 2.12776 | 0.03336  | 0.14575  | 951.795 | 789.144 | 1117.9  | 1206.32 | 1075.63 | 1488.14 | Up   |
| Strn      | 2328.26 | 0.22007 | 0.09562 | 2.30137 | 0.02137  | 0.10682  | 2032.85 | 2223.41 | 2196.81 | 2403.47 | 2615.93 | 2497.13 | Up   |
| Eif2ak2   | 1370.92 | 0.48249 | 0.14182 | 3.40199 | 0.00067  | 0.00804  | 1063.43 | 1201.47 | 1166.63 | 1437.8  | 1504.24 | 1851.97 | Up   |
| Ndufaf7   | 1756.98 | -0.3447 | 0.09661 | -3.568  | 0.00036  | 0.00498  | 1898.69 | 1970.89 | 2028.2  | 1587.7  | 1459.93 | 1596.49 | Down |
| Cdc42ep3  | 3096.84 | 0.52584 | 0.16177 | 3.25048 | 0.00115  | 0.01234  | 2570.43 | 2494.68 | 2550.6  | 3736.24 | 4330.34 | 2898.73 | Up   |
| Rmdn2     | 3907.22 | 0.24696 | 0.09801 | 2.51976 | 0.01174  | 0.0695   | 3776.82 | 3476.18 | 3467.72 | 4166.56 | 4524.04 | 4031.98 | Up   |
| Cyp11b1   | 476.803 | -0.3987 | 0.18447 | -2.1613 | 0.03067  | 0.13715  | 577.736 | 443.893 | 605.244 | 372.196 | 392.544 | 649.205 | Down |
| At12      | 4432.17 | 0.23939 | 0.08985 | 2.66442 | 0.00771  | 0.051    | 4307.56 | 3973.34 | 3915.08 | 4689.67 | 4728.04 | 4979.34 | Up   |
| Ttc39d    | 53.9126 | -1.4293 | 0.54862 | -2.6052 | 0.00918  | 0.05807  | 99.8797 | 51.2943 | 84.7926 | 23.4534 | 12.3636 | 51.6921 | Down |
| Gemin3    | 236.963 | -0.5329 | 0.16558 | -3.2186 | 0.00129  | 0.01339  | 274.18  | 270.282 | 296.287 | 176.411 | 198.848 | 205.774 | Down |
| Morn2     | 408.911 | -0.4592 | 0.21258 | -2.1602 | 0.03076  | 0.13735  | 576.756 | 375.83  | 467.821 | 347.723 | 294.665 | 390.673 | Down |
| Arhgef33  | 217.029 | -1.1756 | 0.28363 | -4.1449 | 3.40E-05 | 0.00076  | 317.265 | 217.015 | 368.409 | 124.405 | 105.09  | 169.987 | Down |
| Cdk14     | 1903.84 | -0.7147 | 0.26422 | -2.7049 | 0.00683  | 0.04678  | 2771.17 | 1678.9  | 2648.06 | 1489.8  | 990.117 | 1845.01 | Down |
| C230072F  | 1554.93 | -0.7875 | 0.31497 | -2.5002 | 0.01241  | 0.07232  | 2135.66 | 1288.28 | 2483.35 | 1342.96 | 669.694 | 1409.6  | Down |
| Tmem178   | 1067.79 | -0.5565 | 0.18243 | -3.0506 | 0.00228  | 0.02095  | 1135.89 | 1499.37 | 1178.32 | 786.2   | 1038.54 | 768.423 | Down |
| Gm6594    | 5.89876 | -2.9688 | 1.38674 | -2.1409 | 0.03228  | NA       | 5.87528 | 16.7693 | 8.77165 | 0       | 0       | 3.97631 | Down |
| Eml4      | 2087.95 | 0.20409 | 0.09615 | 2.12268 | 0.03378  | 0.14689  | 1860.5  | 2059.67 | 1901.5  | 2238.27 | 2159.51 | 2308.25 | Up   |
| 1810073C  | 11.9001 | 1.50351 | 0.67279 | 2.23475 | 0.02543  | 0.12023  | 4.89606 | 5.91858 | 7.79702 | 23.4534 | 14.4242 | 14.9112 | Up   |
| 8430430B  | 6.5759  | -1.9463 | 0.98575 | -1.9744 | 0.04833  | NA       | 4.89606 | 8.87787 | 17.5433 | 3.05914 | 3.0909  | 1.98816 | Down |
| Zfp3612   | 7189.78 | 0.46871 | 0.16105 | 2.91036 | 0.00361  | 0.0295   | 5420.92 | 6925.72 | 5749.33 | 8295.38 | 9702.32 | 7045.03 | Up   |
| Dync2li1  | 3521.03 | -0.9201 | 0.20748 | -4.4347 | 9.22E-06 | 0.00026  | 5186.89 | 4058.17 | 4576.85 | 2673.69 | 1728.84 | 2091.72 | Down |
| Abcg5     | 65.2738 | -1.2257 | 0.42124 | -2.9098 | 0.00362  | 0.02955  | 108.693 | 82.8601 | 82.8433 | 50.9857 | 18.5454 | 47.7158 | Down |
| Slc3a1    | 866.168 | -0.7178 | 0.1427  | -5.0299 | 4.91E-07 | 2.19E-05 | 1181.91 | 926.257 | 1123.75 | 677.091 | 613.028 | 674.979 | Down |
| Prepl     | 2282.36 | -0.4028 | 0.156   | -2.5824 | 0.00981  | 0.06087  | 2891.62 | 2205.66 | 2699.72 | 2025.15 | 1698.96 | 2173.06 | Down |
| Socs5     | 3118.88 | 0.23945 | 0.10446 | 2.29222 | 0.02189  | 0.10849  | 2837.76 | 2979.02 | 2765.02 | 3326.31 | 3667.86 | 3137.31 | Up   |
| Mcf2      | 9031.27 | 0.24418 | 0.11748 | 2.07857 | 0.03766  | 0.15832  | 8000.17 | 8929.16 | 7876.94 | 10196.1 | 10477.1 | 8708.13 | Up   |
| 4833418N  | 341.159 | 0.3001  | 0.14073 | 2.13247 | 0.03297  | 0.14438  | 292.785 | 313.685 | 310.906 |         |         |         |      |

|          |         |         |         |         |          |          |         |         |           |         |         |         |      |
|----------|---------|---------|---------|---------|----------|----------|---------|---------|-----------|---------|---------|---------|------|
| Map3k8   | 1165.93 | 0.76116 | 0.11013 | 6.91124 | 4.80E-12 | 6.64E-10 | 838.206 | 942.04  | 815.763   | 1460.23 | 1438.3  | 1501.06 | Up   |
| Gm10556  | 152.861 | 3.04864 | 0.52491 | 5.8079  | 6.33E-09 | 4.89E-07 | 18.605  | 29.5929 | 50.6806   | 488.443 | 135.999 | 193.845 | Up   |
| Svil     | 7297.74 | 0.29293 | 0.07658 | 3.82511 | 0.00013  | 0.00232  | 6583.25 | 6496.63 | 6598.23   | 7778.39 | 8319.66 | 8010.28 | Up   |
| Gm26682  | 12.5281 | -1.5379 | 0.68342 | -2.2503 | 0.02443  | 0.11684  | 13.709  | 25.6472 | 16.5687   | 4.07886 | 7.21209 | 7.95263 | Down |
| Zfp438   | 455.333 | -0.4092 | 0.18488 | -2.2135 | 0.02686  | 0.12502  | 466.105 | 633.288 | 459.049   | 423.182 | 391.513 | 358.862 | Down |
| Gm10125  | 158.213 | 0.59254 | 0.24978 | 2.37229 | 0.01768  | 0.09429  | 150.799 | 133.168 | 94.5388   | 177.43  | 217.393 | 175.952 | Up   |
| Zeb1     | 3716.15 | 0.29251 | 0.13579 | 2.15413 | 0.03123  | 0.13861  | 3193.21 | 3716.87 | 3111.98   | 3771.93 | 4652.83 | 3850.07 | Up   |
| Arhgap12 | 2386.87 | 0.24164 | 0.10388 | 2.32611 | 0.02001  | 0.10225  | 2325.63 | 2129.7  | 2107.14   | 2554.39 | 2441.81 | 2762.54 | Up   |
| Gm41664  | 22.3852 | -1.2672 | 0.60992 | -2.0777 | 0.03774  | 0.15859  | 32.314  | 18.7422 | 43.8582   | 16.3154 | 6.18179 | 16.8993 | Down |
| Armc4    | 1489.28 | -1.1375 | 0.29776 | -3.8202 | 0.00013  | 0.00235  | 2413.76 | 1361.27 | 2368.34   | 934.059 | 602.725 | 1255.52 | Down |
| Gm46641  | 3.10315 | -5.0555 | 1.78811 | -2.8273 | 0.00469  | NA       | 3.91685 | 6.90501 | 7.79702   | 0       | 0       | 0       | Down |
| Greb1l   | 334.956 | -2.9353 | 0.31265 | -9.3884 | 6.09E-21 | 4.43E-18 | 363.288 | 642.166 | 771.905   | 60.1632 | 91.6966 | 80.5204 | Down |
| Esco1    | 1854.43 | 0.67686 | 0.15378 | 4.4015  | 1.08E-05 | 0.00029  | 1695.02 | 1307.02 | 1279.69   | 2304.56 | 2073.99 | 2466.31 | Up   |
| Abhd3    | 1603.74 | -0.7753 | 0.27312 | -2.8387 | 0.00453  | 0.0348   | 2438.24 | 1489.51 | 2146.13   | 1250.17 | 766.542 | 1531.88 | Down |
| Rbbp8    | 2408.86 | 1.17211 | 0.14957 | 7.83656 | 4.63E-15 | 1.25E-12 | 1736.14 | 1446.11 | 1260.19   | 3546.57 | 3383.5  | 3080.65 | Up   |
| Tmem241  | 767.206 | 0.51612 | 0.11834 | 4.36139 | 1.29E-05 | 0.00034  | 678.594 | 591.858 | 623.761   | 946.295 | 882.966 | 879.759 | Up   |
| Rmc1     | 2877.89 | 0.30782 | 0.09157 | 3.36165 | 0.00077  | 0.00897  | 2514.62 | 2584.45 | 2616.87   | 3271.25 | 3295.92 | 2984.22 | Up   |
| Ankrd29  | 1130.84 | -0.5282 | 0.14073 | -3.7534 | 0.00017  | 0.00287  | 1204.43 | 1391.85 | 1410.29   | 937.118 | 1027.21 | 814.15  | Down |
| Ttc39c   | 848.051 | -0.7504 | 0.18416 | -4.0745 | 4.61E-05 | 0.00098  | 1058.53 | 835.506 | 1297.23   | 625.085 | 608.906 | 663.05  | Down |
| Gm2629   | 31.9196 | -0.9252 | 0.40816 | -2.2667 | 0.02341  | 0.11349  | 45.0438 | 37.4843 | 42.8836   | 20.3943 | 27.8181 | 17.8934 | Down |
| Chst9    | 21.5733 | -1.6415 | 0.49454 | -3.3193 | 0.0009   | 0.0101   | 35.2517 | 34.525  | 28.2642   | 10.1971 | 9.27269 | 11.9289 | Down |
| Gm10036  | 1183    | -0.8807 | 0.33603 | -2.6208 | 0.00877  | 0.0562   | 1323.9  | 2144.5  | 1131.54   | 549.626 | 679.997 | 1268.44 | Down |
| Dsc2     | 274.296 | -1.1206 | 0.37881 | -2.9582 | 0.00309  | 0.0263   | 497.44  | 190.381 | 439.557   | 161.115 | 124.666 | 232.614 | Down |
| Gm16090  | 152.134 | -0.9397 | 0.32705 | -2.8734 | 0.00406  | 0.03198  | 232.073 | 126.263 | 241.708   | 114.208 | 77.2724 | 121.278 | Down |
| Ccdc178  | 14.8067 | 2.71702 | 0.89302 | 3.04249 | 0.00235  | 0.02133  | 0.97921 | 0.98643 | 9.74627   | 22.4337 | 28.8484 | 25.846  | Up   |
| Gm33228  | 233.948 | -0.5798 | 0.23171 | -2.5021 | 0.01234  | 0.07199  | 320.203 | 284.092 | 236.834   | 181.509 | 150.424 | 230.626 | Down |
| Gm49980  | 1621.48 | -1.0582 | 0.3151  | -3.3584 | 0.00078  | 0.00905  | 2936.66 | 1584.21 | 2051.59   | 944.256 | 1537.21 | 674.979 | Down |
| Gm26533  | 1791.59 | -0.288  | 0.10299 | -2.7965 | 0.00517  | 0.03832  | 1992.7  | 2103.07 | 1813.78   | 1607.07 | 1617.57 | 1615.38 | Down |
| Proc     | 132.819 | -1.2213 | 0.5287  | -2.3099 | 0.02089  | 0.10541  | 203.676 | 105.548 | 248.53    | 107.07  | 24.7272 | 107.36  | Down |
| Gm26717  | 290.68  | -1.0947 | 0.29378 | -3.7261 | 0.00019  | 0.00312  | 425.958 | 313.685 | 448.329   | 214.14  | 113.333 | 228.638 | Down |
| Stard4   | 3185.33 | 0.58858 | 0.16538 | 3.55889 | 0.00037  | 0.00511  | 2437.26 | 2954.36 | 2241.64   | 3585.32 | 4508.59 | 3384.84 | Up   |
| Nrep     | 2288.11 | -0.5969 | 0.14875 | -4.0128 | 6.00E-05 | 0.00121  | 2663.46 | 2689.99 | 2911.21   | 1797.76 | 1529.99 | 2136.27 | Down |
| Apc      | 6944.47 | 0.29493 | 0.1044  | 2.8249  | 0.00473  | 0.03589  | 6135.75 | 6686.02 | 5889.67   | 7098.24 | 7736.51 | 8120.63 | Up   |
| Fam13b   | 867.766 | 0.40002 | 0.15371 | 2.60243 | 0.00926  | 0.05841  | 750.077 | 703.324 | 791.397   | 903.467 | 893.269 | 1165.06 | Up   |
| Nme5     | 3178.37 | -0.9241 | 0.29353 | -3.1481 | 0.00164  | 0.01608  | 4617.97 | 2820.2  | 5050.52   | 2407.55 | 1353.81 | 2820.2  | Down |
| Brd8dc   | 202.52  | -0.4839 | 0.19618 | -2.4669 | 0.01363  | 0.07772  | 213.468 | 246.607 | 248.53    | 147.859 | 163.817 | 194.839 | Down |
| Kdm3b    | 3932.17 | 0.25689 | 0.07622 | 3.37049 | 0.00075  | 0.00876  | 3521.25 | 3655.71 | 3572.01   | 4287.9  | 4329.31 | 4226.82 | Up   |
| Gm50163  | 125.631 | -1.9464 | 0.46944 | -4.1462 | 3.38E-05 | 0.00076  | 158.632 | 105.548 | 334.297   | 74.4392 | 38.121  | 42.7454 | Down |
| Slc23a1  | 943.478 | -1.0789 | 0.33322 | -3.2377 | 0.00121  | 0.01278  | 1320.96 | 799.008 | 1722.17   | 599.592 | 379.15  | 839.996 | Down |
| Gm50318  | 204.73  | -0.881  | 0.40348 | -2.1835 | 0.029    | 0.13197  | 318.244 | 196.299 | 281.667   | 123.386 | 74.1815 | 234.603 | Down |
| 1700066B | 115.212 | 0.53399 | 0.27243 | 1.96015 | 0.04998  | 0.19083  | 110.651 | 99.6294 | 72.1224   | 112.169 | 154.545 | 142.153 | Up   |
| Sting1   | 3401.06 | 1.13533 | 0.16215 | 7.00179 | 2.53E-12 | 3.74E-10 | 2179.73 | 2471.01 | 1732.89   | 4412.31 | 5221.55 | 4388.86 | Up   |
| Cxxc5    | 865.528 | -0.5732 | 0.12596 | -4.5506 | 5.35E-06 | 0.00016  | 1032.09 | 944.013 | 1129.59   | 732.155 | 661.452 | 693.867 | Down |
| Cd14     | 7816.25 | 0.92808 | 0.09261 | 10.0219 | 1.22E-23 | 1.22E-20 | 5377.84 | 5041.64 | 5736.66   | 10105.4 | 10601.8 | 10034.2 | Up   |
| Tmco6    | 1208.26 | -0.2163 | 0.1037  | -2.086  | 0.03697  | 0.15663  | 1364.04 | 1297.15 | 1234.85   | 1165.53 | 1074.6  | 1113.37 | Down |
| Dnd1     | 74.0067 | -0.6407 | 0.26659 | -2.4033 | 0.01625  | 0.08855  | 87.1499 | 92.7244 | 90.6403   | 49.966  | 64.9088 | 58.6506 | Down |
| Fchsd1   | 261.633 | 0.44115 | 0.20251 | 2.17846 | 0.02937  | 0.13307  | 243.824 | 245.621 | 176.408   | 334.466 | 279.211 | 290.271 | Up   |
| 2010320C | 6.56235 | -2.19   | 1.10062 | -1.9898 | 0.04661  | NA       | 15.6674 | 5.91858 | 10.7209   | 0       | 3.0909  | 3.97631 | Down |
| Gnpda1   | 1646.07 | 0.28889 | 0.1224  | 2.36017 | 0.01827  | 0.09622  | 1369.92 | 1677.92 | 1397.62   | 1843.64 | 1828.78 | 1758.52 | Up   |
| Arhgap26 | 194.482 | 0.55561 | 0.19034 | 2.91898 | 0.00351  | 0.02889  | 175.279 | 153.883 | 143.27    | 252.889 | 231.817 | 209.751 | Up   |
| Nr3c1    | 8031.58 | 0.29442 | 0.1322  | 2.22701 | 0.02595  | 0.12205  | 6352.15 | 8282.06 | 7010.49   | 8299.46 | 9416.93 | 8828.41 | Up   |
| Gm41708  | 6.25033 | -2.3635 | 1.1331  | -2.0859 | 0.03699  | NA       | 5.87528 | 14.7964 | 10.7209   | 0       | 4.12119 | 1.98816 | Down |
| Ppp2r2b  | 375.147 | -1.0199 | 0.28591 | -3.5672 | 0.00036  | 0.005    | 416.165 | 465.595 | 625.711   | 344.664 | 173.09  | 225.656 | Down |
| Scgb3a2  | 90143.6 | -0.9589 | 0.34907 | -2.747  | 0.00601  | 0.04281  | 135424  | 82683.5 | 139027    | 64801.9 | 29350.1 | 89575.4 | Down |
| Gm41715  | 16.8947 | -1.9211 | 0.881   | -2.1806 | 0.02921  | 0.13266  | 48.9606 | 5.91858 | 25.3403   | 5.09857 | 4.12119 | 11.9289 | Down |
| Spink5   | 2413.38 | -1.9376 | 0.71121 | -2.7244 | 0.00644  | 0.04488  | 2359.9  | 5006.13 | 4116.83   | 800.476 | 339.998 | 1856.94 | Down |
| Kcnn2    | 139.675 | -1.2667 | 0.25907 | -4.8894 | 1.01E-06 | 4.01E-05 | 173.321 | 218.987 | 199.799   | 90.7546 | 59.7573 | 95.4315 | Down |
| A330093E | 32.4024 | -1.9752 | 0.52351 | -3.7729 | 0.00016  | 0.0027   | 40.1477 | 72.9958 | 41.909    | 9.17743 | 10.303  | 19.8816 | Down |
| Trim36   | 334.911 | 0.58439 | 0.16676 | 3.50436 | 0.00046  | 0.00601  | 236.969 | 308.752 | 258.276   | 382.393 | 423.453 | 399.62  | Up   |
| Ccdc112  | 603.669 | -0.3488 | 0.11652 | -2.9931 | 0.00276  | 0.0241   | 693.283 | 685.569 | 650.076   | 542.488 | 504.846 | 545.749 | Down |
| Ticam2   | 250.834 | 1.05278 | 0.23594 | 4.46213 | 8.11E-06 | 0.00024  | 132.194 | 215.042 | 142.296   | 332.427 | 370.907 | 312.141 | Up   |
| Cdo1     | 7834.54 | 0.36893 | 0.08956 | 4.11946 | 3.80E-05 | 0.00083  | 6422.66 | 6829.05 | 7262.92   | 8982.67 | 8885.29 | 8624.63 | Up   |
| Zfp474   | 1806.22 | -0.7288 | 0.28519 | -2.5555 | 0.0106   | 0.06467  | 2417.68 | 1498.39 | 2842.99   | 1578.52 | 895.329 | 1604.44 | Down |
| Gramd3   | 2116.23 | -0.5546 | 0.19847 | -2.7942 | 0.0052   | 0.03855  | 3161.88 | 2005.41 | 2386.86   | 1632.56 | 1514.54 | 1996.11 | Down |
| Aldh7a1  | 3377.36 | -0.2349 | 0.10721 | -2.1905 | 0.02849  | 0.13046  | 3838.51 | 3493.93 | 3622.69   | 3124.41 | 2840.53 | 3344.08 | Down |
| Gm19519  | 26.7371 | 1.27143 | 0.50919 | 2.49696 | 0.01253  | 0.07281  | 15.6674 | 10.8507 | 20.4672   | 24.4732 | 42.2422 | 46.7217 | Up   |
| Slc12a2  | 6491.16 | -0.4216 | 0.14893 | -2.8308 | 0.00464  | 0.03543  | 8858.94 | 6664.32 | 6775.61   | 5394.29 | 5198.89 | 6054.93 | Down |
| Fbn2     | 20.2706 | -1.4603 | 0.53463 | -2.7314 | 0.00631  | 0.04429  | 23.5011 | 35.5115 | 30.2134   | 13.2563 | 7.21209 | 11.9289 | Down |
| Adamts19 | 14.6864 | -1.2273 | 0.59896 | -2.049  | 0.04046  | 0.16602  | 23.5011 | 19.7286 | 18.5179   | 12.2366 | 6.18179 | 7.95263 | Down |
| Smim3    | 2124.16 | -0.5147 | 0.14953 | -3.4423 | 0.00058  | 0.00722  | 2477.41 | 2822.18 | 2197.78   | 1548.95 | 1969.93 | 1728.7  | Down |
| Cd74     | 124311  | 0.4373  | 0.12354 | 3.5398  | 0.0004   | 0.00543  | 94569.4 | 116749  | 105522    | 150124  | 149644  | 129256  | Up   |
| Mir145a  | 14.621  | 1.70547 | 0.61226 | 2.78555 | 0.00534  | 0.03922  | 7.8337  | 5.91858 | 6.82239   | 22.4337 | 27.8181 | 16.8993 | Up   |
| Mir143   | 3.9258  | 5.44368 | 1.92278 | 2.83115 | 0.00464  | NA       | 0       | 0       | 0         | 10.1971 | 12.3636 | 0.99408 | Up   |
| Carmn    | 52.6943 | 1.90472 | 0.42825 | 4.44767 | 8.68E-06 | 0.00025  | 18.605  | 20.715  | 27.2896   | 70.3603 | 120.545 | 58.6506 | Up   |
| Pcyox1l  | 582.905 | -0.3225 | 0.14722 | -2.1909 | 0.02846  | 0.13039  | 670.761 | 711.216 | 561.385   | 508.838 | 550.179 | 495.051 | Down |
| Afap1l1  | 3908.96 | 0.25609 | 0.12003 | 2.1335  | 0.03288  | 0.14419  | 3642.67 | 3882.59 | 3163.64   | 3958.53 | 4348.89 | 4457.45 | Up   |
| Amd-ps3  | 81.9112 | 1.17367 | 0.28251 | 4.15439 | 3.26E-05 | 0.00074  | 60.7112 | 50.3079 | 39.9597</ |         |         |         |      |

|           |         |         |         |         |          |          |         |         |         |         |         |         |      |
|-----------|---------|---------|---------|---------|----------|----------|---------|---------|---------|---------|---------|---------|------|
| Mc5r      | 166.427 | -1.8668 | 0.38359 | -4.8666 | 1.14E-06 | 4.43E-05 | 168.425 | 341.305 | 273.87  | 94.8335 | 80.3633 | 39.7631 | Down |
| Rab27b    | 2766.59 | -0.6645 | 0.30046 | -2.2115 | 0.027    | 0.12546  | 3788.57 | 4629.31 | 1760.18 | 1968.05 | 2091.51 | 2361.93 | Down |
| 4930503L  | 1651.51 | 0.28049 | 0.1322  | 2.12178 | 0.03386  | 0.14716  | 1544.22 | 1521.07 | 1409.31 | 1666.21 | 1688.66 | 2079.61 | Up   |
| Cfap53    | 1690.52 | -0.7342 | 0.24978 | -2.9393 | 0.00329  | 0.02746  | 2252.19 | 1554.61 | 2528.18 | 1408.23 | 882.966 | 1516.96 | Down |
| Acaa2     | 7267.32 | -0.2519 | 0.09899 | -2.5445 | 0.01094  | 0.06599  | 8103.96 | 7769.12 | 7827.23 | 7244.05 | 6445.55 | 6213.98 | Down |
| Katnal2   | 586.71  | -0.7886 | 0.32389 | -2.4349 | 0.0149   | 0.08304  | 900.876 | 437.975 | 890.809 | 428.28  | 295.696 | 566.625 | Down |
| A330094K  | 1.79457 | -4.2656 | 2.1159  | -2.016  | 0.0438   | NA       | 4.89606 | 1.97286 | 3.89851 | 0       | 0       | 0       | Down |
| Haus1     | 452.874 | -0.3576 | 0.16662 | -2.1464 | 0.03184  | 0.14068  | 417.145 | 561.278 | 547.741 | 402.787 | 395.635 | 392.661 | Down |
| Pstpip2   | 645.926 | 0.5113  | 0.15839 | 3.22811 | 0.00125  | 0.0131   | 570.881 | 550.428 | 476.593 | 682.189 | 875.754 | 719.713 | Up   |
| Siglec15  | 9.99291 | -2.6898 | 0.99678 | -2.6985 | 0.00697  | 0.04736  | 10.7713 | 20.715  | 20.4672 | 2.03943 | 0       | 5.96447 | Down |
| Slc14a1   | 540.859 | -1.6672 | 0.30139 | -5.5316 | 3.17E-08 | 2.01E-06 | 916.543 | 486.31  | 1065.27 | 240.653 | 214.302 | 322.081 | Down |
| Slc14a2   | 656.534 | -2.3008 | 0.40248 | -5.7166 | 1.09E-08 | 7.94E-07 | 1256.33 | 567.197 | 1451.22 | 193.746 | 127.757 | 342.957 | Down |
| Gm5823    | 29.6494 | 2.78441 | 0.66671 | 4.17634 | 2.96E-05 | 0.00068  | 7.8337  | 6.90501 | 7.79702 | 57.104  | 80.3633 | 17.8934 | Up   |
| Hsbp11l   | 67.978  | -0.6916 | 0.34305 | -2.016  | 0.0438   | 0.1749   | 60.7112 | 98.643  | 92.5896 | 40.7886 | 51.5149 | 63.621  | Down |
| Mbp       | 4255.02 | 0.31691 | 0.07894 | 4.01459 | 5.95E-05 | 0.0012   | 3791.51 | 3866.8  | 3710.41 | 4585.66 | 4744.52 | 4831.22 | Up   |
| Gm41793   | 10.3427 | -2.1929 | 0.7455  | -2.9416 | 0.00327  | 0.02733  | 16.6466 | 14.7964 | 19.4925 | 3.05914 | 3.0909  | 4.97039 | Down |
| 4933401L  | 73.4508 | -0.839  | 0.3958  | -2.1196 | 0.03404  | 0.14769  | 72.4617 | 141.059 | 69.1985 | 40.7886 | 53.5755 | 63.621  | Down |
| Cndp2     | 7775.5  | 0.31584 | 0.10342 | 3.05397 | 0.00226  | 0.02075  | 6693.9  | 7503.77 | 6585.56 | 8613.53 | 9134.63 | 8121.62 | Up   |
| Neto1     | 60.9313 | 1.04072 | 0.37481 | 2.77669 | 0.00549  | 0.04002  | 24.4803 | 49.3215 | 45.8075 | 73.4195 | 73.1512 | 99.4079 | Up   |
| Cd226     | 379.979 | -0.5414 | 0.16889 | -3.2057 | 0.00135  | 0.01386  | 382.872 | 469.54  | 499.009 | 294.698 | 297.756 | 335.999 | Down |
| Tmx3      | 7230.44 | 0.22902 | 0.07578 | 3.02222 | 0.00251  | 0.02248  | 6773.21 | 6570.61 | 6629.41 | 7559.15 | 7993.06 | 7857.2  | Up   |
| Mrp12l    | 1279.77 | -0.2173 | 0.08992 | -2.4168 | 0.01566  | 0.08617  | 1359.15 | 1373.11 | 1395.67 | 1170.63 | 1195.15 | 1184.94 | Down |
| Cpt1a     | 7405    | 0.38588 | 0.14896 | 2.59046 | 0.00958  | 0.05987  | 6376.63 | 7367.64 | 5517.37 | 8161.8  | 9412.81 | 7593.77 | Up   |
| Lrp5      | 4746.77 | 0.30397 | 0.10102 | 3.00907 | 0.00262  | 0.02316  | 4256.64 | 4386.65 | 4102.21 | 5094.5  | 5711.97 | 4928.64 | Up   |
| Tcirg1    | 6895.19 | 0.36679 | 0.13314 | 2.75485 | 0.00587  | 0.04205  | 5316.15 | 5936.33 | 6817.52 | 8060.85 | 8203.24 | 7037.08 | Up   |
| Aldh3b1   | 9612.79 | -0.3941 | 0.17118 | -2.3023 | 0.02132  | 0.1067   | 11247.2 | 8933.11 | 12572.7 | 9379.34 | 7011.18 | 8533.17 | Down |
| Unc93b1   | 6278.14 | 0.319   | 0.09775 | 3.26355 | 0.0011   | 0.01186  | 5214.31 | 6014.26 | 5531.98 | 6898.37 | 7249.18 | 6760.73 | Up   |
| Aldh3b2   | 36.2369 | -2.1326 | 0.65377 | -3.262  | 0.00111  | 0.01191  | 92.046  | 20.715  | 64.3254 | 11.2169 | 8.24239 | 20.8756 | Down |
| Doc2g     | 162.322 | -0.7952 | 0.24189 | -3.2875 | 0.00101  | 0.01109  | 202.697 | 159.802 | 255.352 | 116.247 | 120.545 | 119.289 | Down |
| Ndufv1    | 4552.62 | -0.2152 | 0.08371 | -2.571  | 0.01014  | 0.06255  | 4865.71 | 4835.48 | 4973.52 | 4397.01 | 4018.16 | 4225.83 | Down |
| Gstp1     | 6221.22 | -0.4363 | 0.10704 | -4.0758 | 4.59E-05 | 0.00097  | 6997.45 | 6641.63 | 7825.28 | 5601.29 | 5111.31 | 5150.32 | Down |
| Gstp2     | 216.362 | -0.5425 | 0.2196  | -2.4703 | 0.0135   | 0.07714  | 266.346 | 198.272 | 305.058 | 167.233 | 181.333 | 179.928 | Down |
| Coro1b    | 6540.25 | 0.48789 | 0.1257  | 3.8815  | 0.0001   | 0.00192  | 5422.88 | 5816.98 | 5094.38 | 7622.37 | 8538.08 | 6746.81 | Up   |
| Ankrd13d  | 692.433 | -0.4594 | 0.14372 | -3.1962 | 0.00139  | 0.01419  | 768.682 | 754.619 | 882.038 | 612.849 | 514.119 | 622.293 | Down |
| Ccdc87    | 232.344 | -0.8306 | 0.29762 | -2.7908 | 0.00526  | 0.03881  | 353.496 | 238.716 | 300.185 | 196.805 | 104.06  | 200.804 | Down |
| Bbs1      | 1566.27 | -0.7316 | 0.24795 | -2.9508 | 0.00317  | 0.02672  | 2207.15 | 1349.44 | 2308.89 | 1209.38 | 893.269 | 1429.48 | Down |
| Rin1      | 555.384 | 0.31217 | 0.14473 | 2.15688 | 0.03101  | 0.1381   | 488.627 | 476.446 | 521.426 | 558.804 | 697.512 | 589.489 | Up   |
| Cnih2     | 171.982 | -0.5232 | 0.20756 | -2.5204 | 0.01172  | 0.06938  | 224.24  | 190.381 | 193.951 | 128.484 | 129.818 | 165.017 | Down |
| Ovol1     | 116.179 | -0.5773 | 0.23027 | -2.5068 | 0.01218  | 0.07138  | 141.986 | 128.236 | 147.169 | 101.971 | 78.3027 | 99.4079 | Down |
| Ap5b1     | 322.742 | 0.4053  | 0.17678 | 2.29269 | 0.02187  | 0.10841  | 284.951 | 271.268 | 276.794 | 338.545 | 436.847 | 328.046 | Up   |
| Ltpb3     | 6523.22 | -0.4293 | 0.09387 | -4.5737 | 4.79E-06 | 0.00015  | 7466.5  | 7744.46 | 7249.28 | 5948    | 5231.86 | 5499.24 | Down |
| Frmdb8os  | 13.525  | -1.6815 | 0.72755 | -2.3112 | 0.02082  | 0.10509  | 23.5011 | 29.5929 | 8.77165 | 7.138   | 6.18179 | 5.96447 | Down |
| Slc25a45  | 1659    | 0.30504 | 0.14343 | 2.12675 | 0.03344  | 0.14604  | 1445.32 | 1692.71 | 1314.77 | 1682.53 | 2019.38 | 1799.28 | Up   |
| Capn1     | 4080.35 | 0.2456  | 0.1131  | 2.17159 | 0.02989  | 0.13468  | 3696.53 | 3935.85 | 3569.09 | 4544.87 | 4772.34 | 3963.39 | Up   |
| Znhit2    | 1008.61 | -0.2793 | 0.13118 | -2.1292 | 0.03324  | 0.14535  | 1146.66 | 1018.98 | 1152.01 | 974.847 | 950.965 | 808.186 | Down |
| Tm7sf2    | 1574.2  | 0.55638 | 0.12622 | 4.40805 | 1.04E-05 | 0.00029  | 1228.91 | 1446.11 | 1148.11 | 1823.25 | 1934.9  | 1863.9  | Up   |
| Ppp2r5b   | 3498.13 | -0.212  | 0.08607 | -2.4626 | 0.01379  | 0.07841  | 3887.47 | 3785.92 | 3590.53 | 3345.68 | 3200.11 | 3179.06 | Down |
| Gm14963   | 67.3383 | -0.7387 | 0.3519  | -2.099  | 0.03582  | 0.1532   | 88.1291 | 59.1858 | 105.26  | 44.8675 | 62.8482 | 43.7395 | Down |
| Ehd1      | 7360.54 | 0.24343 | 0.11762 | 2.06964 | 0.03849  | 0.16084  | 6304.17 | 6846.81 | 7071.9  | 8129.17 | 819.712 | 7091.76 | Up   |
| Pygm      | 1081.87 | -0.4488 | 0.12989 | -3.4553 | 0.00055  | 0.00693  | 1364.04 | 1159.05 | 1223.16 | 955.473 | 965.39  | 824.091 | Down |
| Nrxn2     | 385.091 | -0.7969 | 0.20767 | -3.8372 | 0.00012  | 0.00222  | 515.066 | 489.269 | 461.973 | 325.289 | 312.18  | 206.768 | Down |
| Rps6ka4   | 1692.56 | 0.40588 | 0.12712 | 3.19285 | 0.00141  | 0.01426  | 1382.65 | 1465.83 | 1519.44 | 2017    | 2089.45 | 1680.99 | Up   |
| Ccdc88b   | 706.745 | 0.64238 | 0.18447 | 3.48232 | 0.0005   | 0.00642  | 445.542 | 632.301 | 577.954 | 838.206 | 985.996 | 760.47  | Up   |
| Prdx5     | 7697.59 | -0.3273 | 0.15223 | -2.1498 | 0.03157  | 0.13979  | 9385.75 | 6896.13 | 9418.8  | 7271.59 | 6362.09 | 6851.19 | Down |
| Esrra     | 2050.01 | 0.55718 | 0.13042 | 4.27203 | 1.94E-05 | 0.00048  | 1522.68 | 1638.46 | 1815.73 | 2351.46 | 2725.14 | 2246.62 | Up   |
| Kcnk4     | 73.0781 | -1.2274 | 0.47193 | -2.6008 | 0.0093   | 0.05851  | 108.693 | 64.1179 | 134.499 | 47.9266 | 20.606  | 62.6269 | Down |
| Gpr137    | 2915.51 | -0.3747 | 0.13568 | -2.762  | 0.00575  | 0.04144  | 3331.28 | 2862.62 | 3682.14 | 2769.55 | 2470.66 | 2376.84 | Down |
| Bad       | 2016.65 | -0.2558 | 0.09419 | -2.7154 | 0.00662  | 0.04576  | 2239.46 | 2149.43 | 2195.84 | 1951.73 | 1800.96 | 1762.5  | Down |
| Fermt3    | 1754.2  | 0.52832 | 0.18365 | 2.87681 | 0.00402  | 0.03179  | 1321.94 | 1660.16 | 1327.44 | 1994.56 | 2523.2  | 1697.89 | Up   |
| Stip1     | 7646.33 | -0.4046 | 0.16621 | -2.4342 | 0.01492  | 0.08314  | 10613.7 | 7505.74 | 8015.33 | 6560.85 | 5877.85 | 7304.49 | Down |
| Macrodl   | 1110.39 | -0.5641 | 0.12785 | -4.4121 | 1.02E-05 | 0.00028  | 1395.38 | 1229.09 | 1349.86 | 942.217 | 796.421 | 949.345 | Down |
| Mark2     | 4442.17 | 0.22322 | 0.09806 | 2.27646 | 0.02282  | 0.11132  | 4292.87 | 4153.86 | 3850.75 | 4727.4  | 5075.25 | 4552.88 | Up   |
| Plaat3    | 4472.61 | -0.279  | 0.13643 | -2.0449 | 0.04087  | 0.16703  | 5200.6  | 4249.54 | 5261.04 | 4298.1  | 3591.62 | 4234.77 | Down |
| 9830166K  | 55.3954 | -1.7795 | 0.44038 | -4.0408 | 5.33E-05 | 0.00111  | 93.0252 | 54.2536 | 110.133 | 15.2957 | 28.8484 | 30.8164 | Down |
| Hnrnpul2  | 3466.88 | 0.333   | 0.10123 | 3.28958 | 0.001    | 0.01103  | 3260.78 | 2821.19 | 3123.68 | 3894.29 | 3711.14 | 3990.23 | Up   |
| Bscl2     | 5229.55 | 0.26278 | 0.11835 | 2.22033 | 0.0264   | 0.12361  | 4783.45 | 5222.16 | 4258.15 | 5593.14 | 6108.64 | 5411.76 | Up   |
| Ahnak     | 39075.8 | 0.29032 | 0.0966  | 3.00552 | 0.00265  | 0.02337  | 34481   | 32899.4 | 38091.4 | 41642.1 | 44628.4 | 42712.6 | Up   |
| Scgb1a1   | 504900  | -0.8974 | 0.21706 | -4.1342 | 3.56E-05 | 0.00079  | 590088  | 527810  | 853262  | 421330  | 282153  | 354759  | Down |
| Asrgl1    | 936.583 | -0.4249 | 0.12744 | -3.3341 | 0.00086  | 0.00973  | 1019.36 | 1111.71 | 1089.63 | 726.037 | 784.057 | 888.706 | Down |
| Stxbp3-ps | 127.915 | 0.44307 | 0.21917 | 2.02154 | 0.04322  | 0.1734   | 124.36  | 92.7244 | 108.184 | 149.898 | 143.211 | 149.112 | Up   |
| Gm29231   | 35.4109 | 1.09609 | 0.5136  | 2.13414 | 0.03283  | 0.14412  | 16.6882 | 35.5115 | 17.5433 | 31.6112 | 50.4846 | 62.6269 | Up   |
| Incenp    | 689.662 | 0.70936 | 0.11564 | 6.13434 | 8.55E-10 | 7.70E-08 | 514.087 | 553.387 | 502.908 | 893.27  | 828.36  | 845.961 | Up   |
| Fth1      | 148473  | 0.42092 | 0.13407 | 3.13954 | 0.00169  | 0.01651  | 118234  | 129903  | 132762  | 169828  | 194256  | 145858  | Up   |
| Rab3il1   | 1094.81 | 0.55523 | 0.18631 | 2.98016 | 0.00288  | 0.0249   | 892.063 | 1073.24 | 694.909 | 1197.15 | 1262.12 | 1449.37 | Up   |
| Fads2     | 6281.49 | 0.40118 | 0.11348 | 3.53519 | 0.00041  | 0.00551  | 5056.65 | 6086.27 | 5098.28 | 6888.17 | 7388.77 | 7171.28 | Up   |
| Fads1     | 16414.8 | 0.3769  | 0.09907 | 3.80425 | 0.00014  | 0.00246  | 13379   | 15346.9 | 14122.3 | 17537.1 | 19437.6 | 18665.8 | Up   |
| Myrf      | 2716.9  | 0.45233 | 0.15262 | 2.96379 | 0.00304  | 0.02598  | 2087.68 | 2724.52 | 2071.08 | 3095.85 | 3447.38 | 2       |      |

|           |         |         |         |         |          |          |         |         |         |         |         |         |      |
|-----------|---------|---------|---------|---------|----------|----------|---------|---------|---------|---------|---------|---------|------|
| Tkfc      | 408.953 | 0.64608 | 0.15056 | 4.29122 | 1.78E-05 | 0.00045  | 284.951 | 338.345 | 333.323 | 470.089 | 540.907 | 486.104 | Up   |
| Slc15a3   | 1276.37 | 1.26949 | 0.27839 | 4.56004 | 5.11E-06 | 0.00016  | 789.245 | 974.592 | 481.466 | 1739.63 | 2294.47 | 1378.79 | Up   |
| Tmem109   | 6076.24 | -0.3507 | 0.13337 | -2.6296 | 0.00855  | 0.05522  | 7037.6  | 7205.87 | 6189.86 | 5645.14 | 5791.31 | 4587.67 | Down |
| Ms4a8a    | 2133.23 | 1.20653 | 0.21162 | 5.7013  | 1.19E-08 | 8.59E-07 | 1589.26 | 1344.5  | 935.642 | 2934.74 | 3419.56 | 2575.66 | Up   |
| Ms4a14    | 124.414 | 1.10065 | 0.42139 | 2.61194 | 0.009    | 0.05725  | 82.2539 | 101.602 | 53.6045 | 130.524 | 106.121 | 272.378 | Up   |
| Ms4a7     | 649.411 | 1.18945 | 0.25922 | 4.58855 | 4.46E-06 | 0.00014  | 334.891 | 499.133 | 353.79  | 749.49  | 730.482 | 1228.68 | Up   |
| Ms4a6d    | 1536.2  | 1.03562 | 0.18746 | 5.52455 | 3.30E-08 | 2.08E-06 | 1032.09 | 1202.46 | 787.499 | 1901.77 | 2373.81 | 1919.57 | Up   |
| Mpeg1     | 20404.5 | 1.40935 | 0.19472 | 7.23765 | 4.57E-13 | 8.07E-11 | 11532.2 | 13472.7 | 8480.23 | 26936.8 | 34910.6 | 27094.6 | Up   |
| Lpxn      | 657.184 | 0.56081 | 0.13926 | 4.02702 | 5.65E-05 | 0.00115  | 470.022 | 598.763 | 524.349 | 765.806 | 808.784 | 775.381 | Up   |
| Cep78     | 817.021 | -0.3714 | 0.15683 | -2.3681 | 0.01788  | 0.09508  | 1010.55 | 815.777 | 938.566 | 769.885 | 607.876 | 759.476 | Down |
| Gnaq      | 4738.09 | 0.21375 | 0.10635 | 2.00989 | 0.04444  | 0.17638  | 4490.67 | 4510.94 | 4161.66 | 4605.03 | 5280.28 | 5379.95 | Up   |
| Gna14     | 1435.8  | -0.4741 | 0.16813 | -2.8198 | 0.00481  | 0.03622  | 1924.15 | 1392.84 | 1691.95 | 1134.94 | 1092.12 | 1378.79 | Down |
| Prune2    | 654.756 | 1.00653 | 0.20277 | 4.96382 | 6.91E-07 | 2.91E-05 | 443.583 | 524.781 | 337.221 | 784.161 | 1010.72 | 828.067 | Up   |
| Gm50277   | 18.3591 | -2.5386 | 0.80945 | -3.1362 | 0.00171  | 0.01663  | 60.7112 | 12.8236 | 20.4672 | 4.07886 | 4.12119 | 7.95263 | Down |
| Rfk       | 11798.8 | -0.6269 | 0.15316 | -4.0932 | 4.26E-05 | 0.00091  | 15798.6 | 12231.7 | 14938.1 | 9672    | 7881.78 | 10270.8 | Down |
| Ostf1     | 9095.93 | 0.32059 | 0.12301 | 2.60628 | 0.00915  | 0.05799  | 8043.25 | 8495.13 | 7729.77 | 10374.6 | 11158.1 | 8774.73 | Up   |
| Carnmt1   | 673.803 | -0.4824 | 0.22955 | -2.1017 | 0.03558  | 0.15239  | 681.532 | 773.361 | 901.53  | 458.872 | 475.998 | 751.523 | Down |
| Trpm6     | 3965.53 | 0.47399 | 0.13687 | 3.46313 | 0.00053  | 0.00678  | 2954.28 | 3580.74 | 3424.84 | 4465.33 | 4150.04 | 5217.92 | Up   |
| Aldh1a1   | 75335.6 | -0.6357 | 0.2702  | -2.3528 | 0.01863  | 0.09745  | 91855.1 | 59996.6 | 123160  | 66629.2 | 42592.5 | 67780.3 | Down |
| Aldh1a7   | 10504.9 | -0.7448 | 0.21496 | -3.4647 | 0.00053  | 0.00675  | 12567.2 | 11123   | 15783.1 | 8625.77 | 5639.85 | 9290.66 | Down |
| Gda       | 4149.43 | 0.8906  | 0.17871 | 4.98344 | 6.25E-07 | 2.70E-05 | 3191.25 | 2872.48 | 2659.76 | 4623.39 | 6801    | 4748.71 | Up   |
| 1110059E  | 3353.79 | 0.28641 | 0.13422 | 2.13385 | 0.03285  | 0.14414  | 2789.78 | 2962.25 | 3313.73 | 3898.37 | 3965.62 | 3192.98 | Up   |
| Ldhb-ps   | 32.4058 | -0.9297 | 0.42587 | -2.1832 | 0.02902  | 0.13197  | 38.1893 | 53.2672 | 36.0612 | 27.5323 | 17.5151 | 21.8697 | Down |
| C330002C  | 567.744 | -0.9356 | 0.24624 | -3.7995 | 0.00015  | 0.0025   | 753.994 | 609.613 | 873.266 | 527.193 | 317.332 | 325.064 | Down |
| 1700028P  | 501.302 | -1.2175 | 0.25199 | -4.8314 | 1.36E-06 | 5.20E-05 | 841.144 | 496.174 | 766.057 | 342.624 | 230.787 | 331.028 | Down |
| Fxn       | 419.693 | -0.3497 | 0.15064 | -2.3211 | 0.02028  | 0.10319  | 442.604 | 530.699 | 437.608 | 387.492 | 368.847 | 350.91  | Down |
| Tmem252   | 1536.43 | -0.6966 | 0.2193  | -3.1766 | 0.00149  | 0.01494  | 2551.83 | 1556.59 | 1592.54 | 1328.69 | 1044.72 | 1144.18 | Down |
| Pgm5      | 674.988 | -0.405  | 0.16711 | -2.4235 | 0.01537  | 0.08497  | 781.412 | 689.514 | 836.23  | 550.646 | 685.148 | 506.98  | Down |
| Dock8     | 4687.84 | 0.24455 | 0.11373 | 2.15035 | 0.03153  | 0.13966  | 4565.09 | 4448.8  | 3860.5  | 4814.07 | 5450.28 | 4988.29 | Up   |
| Kank1     | 2110.01 | -0.3494 | 0.10315 | -3.3875 | 0.00071  | 0.00834  | 2253.17 | 2326    | 2513.56 | 1970.09 | 1828.78 | 1768.47 | Down |
| Dmr2      | 267.324 | -1.4631 | 0.36704 | -3.9862 | 6.71E-05 | 0.00133  | 416.165 | 307.766 | 453.202 | 156.016 | 67.9997 | 202.792 | Down |
| Smarca2   | 2789.3  | 0.31247 | 0.13361 | 2.33872 | 0.01935  | 0.09986  | 2736.9  | 2242.15 | 2486.27 | 2915.36 | 2882.78 | 3472.32 | Up   |
| Gm50114   | 4.4192  | -2.9444 | 1.42576 | -2.0652 | 0.03891  | NA       | 9.79213 | 1.97286 | 11.6955 | 0       | 2.0606  | 0.99408 | Down |
| Rfx3      | 1319.25 | -0.6091 | 0.18955 | -3.2135 | 0.00131  | 0.01355  | 1763.56 | 1319.84 | 1697.8  | 1007.48 | 862.36  | 1264.47 | Down |
| Glis3     | 1152.01 | -0.6813 | 0.21992 | -3.0981 | 0.00195  | 0.0184   | 1584.37 | 1109.73 | 1563.3  | 892.251 | 675.876 | 1086.53 | Down |
| 443040211 | 1246.62 | -0.9719 | 0.28447 | -3.4166 | 0.00063  | 0.00775  | 1658.79 | 1234.02 | 2061.34 | 961.591 | 518.24  | 1045.77 | Down |
| Gm5518    | 226.169 | -0.7213 | 0.16577 | -4.3513 | 1.35E-05 | 0.00035  | 290.826 | 264.363 | 289.464 | 182.529 | 163.817 | 166.011 | Down |
| Pdcd1lg2  | 73.6772 | 1.00202 | 0.37406 | 2.67873 | 0.00739  | 0.04946  | 52.8775 | 65.1044 | 29.2388 | 93.8138 | 119.515 | 81.5144 | Up   |
| A9300071  | 404.713 | 0.43539 | 0.18922 | 2.30096 | 0.02139  | 0.10689  | 360.35  | 354.128 | 317.728 | 466.01  | 554.301 | 375.762 | Up   |
| Il33      | 35873.3 | 0.60599 | 0.25131 | 2.41133 | 0.01589  | 0.08711  | 28056.4 | 37331.4 | 19956.5 | 40144.1 | 34331.6 | 55419.9 | Up   |
| Ppp1r2-p  | 28.8807 | -2.8336 | 0.52308 | -5.4172 | 6.05E-08 | 3.61E-06 | 38.1893 | 59.1858 | 54.5791 | 5.09857 | 9.27269 | 6.95855 | Down |
| Prkg1     | 1569.48 | -0.3281 | 0.14711 | -2.23   | 0.02575  | 0.12131  | 1648.02 | 1955.1  | 1638.35 | 1200.2  | 1552.66 | 1422.53 | Down |
| 2700046G  | 88.017  | -0.7762 | 0.28162 | -2.7563 | 0.00585  | 0.04194  | 92.046  | 138.1   | 103.31  | 68.3209 | 58.727  | 67.5973 | Down |
| Pten      | 6446.43 | 0.24858 | 0.11212 | 2.21708 | 0.02662  | 0.12437  | 5450.3  | 5888.98 | 6338    | 6386.47 | 7405.79 | 7209.06 | Up   |
| Lipo3     | 3114.62 | 0.25484 | 0.09774 | 2.60724 | 0.00913  | 0.05789  | 2911.2  | 2982.96 | 2626.62 | 3281.44 | 3492.71 | 3392.79 | Up   |
| Lipf      | 155.119 | 2.34466 | 0.43077 | 5.44291 | 5.24E-08 | 3.16E-06 | 47.9814 | 69.0501 | 36.0612 | 220.258 | 415.21  | 142.153 | Up   |
| Lipn      | 2.7014  | 4.90563 | 1.94514 | 2.522   | 0.01167  | NA       | 0       | 0       | 0       | 9.17743 | 2.0606  | 4.97039 | Up   |
| Ankrd22   | 108.787 | 0.94052 | 0.47045 | 1.99919 | 0.04559  | 0.17953  | 121.422 | 67.0772 | 35.0866 | 100.952 | 201.938 | 126.248 | Up   |
| Ch25h     | 1391.08 | 1.92015 | 0.22649 | 8.4779  | 2.29E-17 | 9.04E-15 | 678.594 | 531.686 | 534.096 | 2354.52 | 2711.75 | 1535.85 | Up   |
| Gm26902   | 104.768 | 1.28009 | 0.26292 | 4.86868 | 1.12E-06 | 4.39E-05 | 66.5865 | 62.1451 | 54.5791 | 157.036 | 168.969 | 119.289 | Up   |
| Lipa      | 4860.52 | 1.07461 | 0.1703  | 6.31017 | 2.79E-10 | 2.79E-08 | 2929.8  | 3594.55 | 2864.43 | 6057.11 | 8001.3  | 5715.95 | Up   |
| Ifit1bl1  | 714.194 | 0.85012 | 0.22808 | 3.72734 | 0.00019  | 0.00312  | 355.454 | 660.908 | 512.654 | 971.788 | 847.936 | 936.422 | Up   |
| Slc16a12  | 1333.63 | -0.6308 | 0.27029 | -2.3338 | 0.01961  | 0.10078  | 1402.23 | 1369.16 | 2090.58 | 1124.75 | 679.997 | 1335.05 | Down |
| Gm50140   | 24.4112 | -2.4843 | 0.68102 | -3.6479 | 0.00026  | 0.00397  | 56.7943 | 21.7015 | 45.8075 | 3.05914 | 6.18179 | 12.923  | Down |
| Hectd2os  | 35.9434 | -1.1281 | 0.45065 | -2.5033 | 0.0123   | 0.07184  | 50.9191 | 52.2808 | 44.8329 | 23.4534 | 12.3636 | 31.8105 | Down |
| Myof      | 11951.3 | 0.52718 | 0.12094 | 4.35895 | 1.31E-05 | 0.00034  | 9917.47 | 9769.6  | 9687.8  | 14067   | 15923.3 | 12342.5 | Up   |
| Ffar4     | 1723.49 | -0.6967 | 0.20577 | -3.3857 | 0.00071  | 0.00838  | 2192.46 | 1635.5  | 2567.17 | 1571.38 | 1119.93 | 1254.53 | Down |
| Slc35g1   | 1268.91 | 0.90831 | 0.12114 | 7.49797 | 6.48E-14 | 1.33E-11 | 844.081 | 829.587 | 972.678 | 1726.38 | 1697.93 | 1542.81 | Up   |
| Aldh18a1  | 1194.2  | 0.45652 | 0.1458  | 3.13112 | 0.00174  | 0.01683  | 1094.76 | 1041.67 | 883.987 | 1537.73 | 1374.42 | 1232.66 | Up   |
| Cc2d2b    | 191.835 | 0.60005 | 0.29239 | 2.05221 | 0.04015  | 0.16534  | 138.069 | 141.059 | 178.357 | 152.957 | 304.968 | 235.597 | Up   |
| Ccnj      | 1778.79 | 0.319   | 0.12679 | 2.51602 | 0.01187  | 0.07     | 1551.07 | 1792.34 | 1405.41 | 1938.48 | 2041.02 | 1944.42 | Up   |
| E030044B  | 196.987 | -0.7419 | 0.19606 | -3.7838 | 0.00015  | 0.00262  | 235.011 | 223.92  | 280.693 | 163.154 | 135.999 | 143.147 | Down |
| Zfp518a   | 1380.02 | 0.26962 | 0.10794 | 2.4978  | 0.0125   | 0.07266  | 1222.06 | 1241.91 | 1290.41 | 1383.75 | 1547.51 | 1594.5  | Up   |
| Tm9sf3    | 21580.6 | 0.20153 | 0.08406 | 2.39748 | 0.01651  | 0.08972  | 20873.9 | 20044.2 | 19309.3 | 21993.2 | 23456.8 | 23806.2 | Up   |
| Pik3ap1   | 3313.35 | 0.83687 | 0.22539 | 3.71307 | 0.0002   | 0.00325  | 2540.08 | 3001.71 | 1593.52 | 4090.08 | 4730.1  | 3924.62 | Up   |
| Arhgap19  | 417.313 | 0.48641 | 0.17637 | 2.75792 | 0.00582  | 0.04183  | 283.972 | 378.789 | 380.105 | 444.596 | 522.361 | 494.057 | Up   |
| Morn4     | 501.993 | -0.6372 | 0.21514 | -2.9617 | 0.00306  | 0.02612  | 643.343 | 485.323 | 704.656 | 424.201 | 309.09  | 445.347 | Down |
| Avpi1     | 3358.68 | 0.37694 | 0.10871 | 3.46734 | 0.00053  | 0.00671  | 2825.03 | 2830.07 | 3111.98 | 4142.08 | 3678.17 | 3564.77 | Up   |
| Marveld1  | 12750.2 | 0.44471 | 0.0869  | 5.11725 | 3.10E-07 | 1.50E-05 | 10121.1 | 11178.2 | 11102   | 14838.9 | 15014.5 | 14246.1 | Up   |
| Sfrp5     | 19.3115 | -2.7352 | 0.90347 | -3.0274 | 0.00247  | 0.02218  | 58.7528 | 8.87787 | 33.1373 | 6.11829 | 1.0303  | 7.95263 | Down |
| Crtac1    | 13.979  | 2.11899 | 0.6572  | 3.2243  | 0.00126  | 0.01321  | 5.87528 | 5.91858 | 3.89851 | 22.4337 | 28.8484 | 16.8993 | Up   |
| Loxl4     | 127.123 | 1.2976  | 0.28487 | 4.55508 | 5.24E-06 | 0.00016  | 90.0876 | 67.0772 | 63.3508 | 185.588 | 219.454 | 137.183 | Up   |
| Pyroxd2   | 404.61  | -1.045  | 0.23567 | -4.434  | 9.25E-06 | 0.00026  | 416.165 | 558.319 | 660.797 | 247.791 | 221.514 | 323.076 | Down |
| Got1      | 1674.13 | -0.4335 | 0.13934 | -3.1109 | 0.00187  | 0.01773  | 1932.97 | 1736.12 | 2102.27 | 1541.81 | 1240.48 | 1491.12 | Down |
| Cpn1      | 961.108 | -0.5803 | 0.21598 | -2.6867 | 0.00722  | 0.04863  | 1064.4  | 1427.36 | 963.906 | 732.155 | 628.482 | 950.339 | Down |
| Bloc1s2   | 2255.08 | 0.30905 | 0.13106 | 2.35802 | 0.01837  | 0.09655  | 1873.23 | 2252.02 | 1918.07 | 2551.33 | 2693.2  | 2242.64 | Up   |
| Scd3      | 64.2797 | -1.6871 | 0.33919 | -4.974  | 6.56E-07 | 2.79E-   |         |         |         |         |         |         |      |

|           |         |         |         |         |          |          |         |         |         |         |         |         |      |
|-----------|---------|---------|---------|---------|----------|----------|---------|---------|---------|---------|---------|---------|------|
| Nfkb2     | 2390.66 | 0.41017 | 0.11548 | 3.55205 | 0.00038  | 0.00523  | 2081.81 | 2253.99 | 1823.53 | 2680.83 | 2759.14 | 2744.65 | Up   |
| Arl3      | 3015.02 | -0.4878 | 0.11246 | -4.3378 | 1.44E-05 | 0.00037  | 3823.83 | 3300.59 | 3435.56 | 2576.82 | 2313.02 | 2640.27 | Down |
| Wbp11     | 6389.81 | 0.27992 | 0.09503 | 2.94562 | 0.00322  | 0.02701  | 5477.72 | 5610.81 | 6226.89 | 7023.8  | 7212.09 | 6787.57 | Up   |
| Pdcd11    | 52.7909 | 0.79589 | 0.34939 | 2.27796 | 0.02273  | 0.111    | 39.1685 | 49.3215 | 27.2896 | 72.3998 | 65.9391 | 62.6269 | Up   |
| Neurl1a   | 1225.96 | -0.5059 | 0.11354 | -4.4559 | 8.35E-06 | 0.00024  | 1511.9  | 1400.73 | 1403.46 | 1082.94 | 1028.24 | 928.469 | Down |
| Slk       | 8381.21 | 0.22329 | 0.09285 | 2.40493 | 0.01618  | 0.08835  | 7612.4  | 8155.8  | 7433.48 | 8665.54 | 9579.71 | 8840.34 | Up   |
| Cfap43    | 7442.96 | -0.9609 | 0.26756 | -3.5912 | 0.00033  | 0.00469  | 10784.1 | 6741.26 | 11976.2 | 5632.91 | 3393.8  | 6129.49 | Down |
| Cfap58    | 1056.62 | -0.8032 | 0.3015  | -2.6641 | 0.00772  | 0.05102  | 1573.59 | 865.099 | 1591.57 | 809.654 | 501.755 | 998.055 | Down |
| Add3      | 8427.62 | -0.2424 | 0.10647 | -2.2769 | 0.02279  | 0.11126  | 8895.17 | 8366.9  | 10140   | 7720.26 | 7701.48 | 7741.88 | Down |
| 1700001K  | 57.9537 | 1.19149 | 0.32244 | 3.69521 | 0.00022  | 0.00343  | 29.3764 | 39.4572 | 37.0358 | 89.7349 | 85.5148 | 66.6033 | Up   |
| Dusp5     | 634.176 | 0.71461 | 0.32543 | 2.19591 | 0.0281   | 0.12915  | 355.454 | 693.46  | 391.8   | 851.462 | 1014.84 | 498.033 | Up   |
| Nutf2-ps1 | 145.544 | 0.58731 | 0.2297  | 2.55684 | 0.01056  | 0.06452  | 135.131 | 109.494 | 104.285 | 174.371 | 199.878 | 150.106 | Up   |
| Adra2a    | 102.528 | -1.1919 | 0.38059 | -3.1317 | 0.00174  | 0.01681  | 188.009 | 93.7108 | 146.194 | 78.518  | 39.1513 | 69.5855 | Down |
| Gm50186   | 117.755 | -1.6901 | 0.3157  | -5.3536 | 8.62E-08 | 4.94E-06 | 163.529 | 136.127 | 239.758 | 61.1829 | 44.3028 | 61.6329 | Down |
| Gm50191   | 2.28112 | -4.6119 | 2.02163 | -2.2813 | 0.02253  | NA       | 3.91685 | 1.97286 | 7.79702 | 0       | 0       | 0       | Down |
| Acs15     | 1051.79 | 0.44557 | 0.16527 | 2.69606 | 0.00702  | 0.0476   | 977.254 | 889.76  | 805.042 | 1014.62 | 1207.51 | 1416.56 | Up   |
| Tcf7l2    | 1522.53 | 0.65728 | 0.1487  | 4.42033 | 9.86E-06 | 0.00027  | 1141.76 | 1256.71 | 1146.16 | 1806.93 | 2182.17 | 1601.46 | Up   |
| Casp7     | 2581.04 | 0.21567 | 0.10185 | 2.1174  | 0.03423  | 0.14826  | 2223.79 | 2461.14 | 2480.43 | 2706.32 | 2941.5  | 2673.08 | Up   |
| Dclre1a   | 712.389 | 0.26515 | 0.11102 | 2.38834 | 0.01692  | 0.09135  | 614.946 | 644.139 | 682.239 | 777.023 | 770.663 | 785.322 | Up   |
| Gm32492   | 10.0364 | -1.8315 | 0.92891 | -1.9716 | 0.04865  | 0.18754  | 3.91685 | 16.7693 | 26.3149 | 3.05914 | 6.18179 | 3.97631 | Down |
| Ablim1    | 7633.75 | 0.23431 | 0.11798 | 1.98595 | 0.04704  | 0.18342  | 6637.1  | 7789.83 | 6618.69 | 7760.03 | 8966.69 | 8030.17 | Up   |
| Atrnl1    | 4255.79 | 0.30112 | 0.13039 | 2.30947 | 0.02092  | 0.10547  | 3955.04 | 4209.1  | 3275.72 | 4378.66 | 4867.13 | 4849.12 | Up   |
| Gm16277   | 141.131 | -1.3622 | 0.33816 | -4.0285 | 5.61E-05 | 0.00115  | 209.552 | 124.29  | 275.82  | 88.7152 | 64.9088 | 83.5026 | Down |
| Gfra1     | 1532.97 | -1.339  | 0.31433 | -4.2598 | 2.05E-05 | 0.0005   | 2078.87 | 1529.95 | 2983.33 | 797.417 | 566.664 | 1241.6  | Down |
| Eno4      | 2773.06 | -1.0894 | 0.27099 | -4.02   | 5.82E-05 | 0.00118  | 4262.51 | 2543.02 | 4513.5  | 1953.77 | 1205.45 | 2160.13 | Down |
| Shtn1     | 4723.16 | 0.57903 | 0.12854 | 4.50452 | 6.65E-06 | 0.0002   | 3774.87 | 4088.75 | 3499.89 | 5314.75 | 6423.91 | 5236.81 | Up   |
| Fam204a   | 1584    | -0.2453 | 0.1203  | -2.039  | 0.04145  | 0.16869  | 1589.26 | 1929.46 | 1636.4  | 1408.23 | 1447.57 | 1493.11 | Down |
| Csf2ra    | 3659.96 | 0.72676 | 0.15425 | 4.71157 | 2.46E-06 | 8.60E-05 | 2773.13 | 3038.2  | 2459.96 | 4647.86 | 5216.4  | 3824.22 | Up   |
| Nudt10    | 120.117 | -1.0228 | 0.28588 | -3.5779 | 0.00035  | 0.00486  | 134.152 | 165.72  | 183.23  | 69.3406 | 63.8785 | 104.378 | Down |
| Clcn5     | 1263.97 | 0.6618  | 0.13926 | 4.75216 | 2.01E-06 | 7.23E-05 | 938.086 | 1061.4  | 937.591 | 1412.31 | 1773.14 | 1461.3  | Up   |
| 2010204K  | 230.194 | -0.9348 | 0.23761 | -3.9344 | 8.34E-05 | 0.0016   | 346.641 | 225.892 | 334.297 | 173.352 | 134.969 | 166.011 | Down |
| Ccdc120   | 1722.55 | -0.2224 | 0.10825 | -2.0549 | 0.03989  | 0.16477  | 2007.39 | 1831.8  | 1726.06 | 1661.12 | 1540.3  | 1568.66 | Down |
| Pim2      | 790.641 | -0.4843 | 0.19382 | -2.4989 | 0.01246  | 0.07253  | 908.709 | 828.601 | 1029.21 | 675.051 | 509.998 | 792.281 | Down |
| Slc35a2   | 2532.58 | -0.2933 | 0.14856 | -1.9743 | 0.04835  | 0.18679  | 3125.65 | 2386.17 | 2855.66 | 2363.7  | 2003.93 | 2460.34 | Down |
| Glod5     | 3.56661 | 3.31087 | 1.6485  | 2.00842 | 0.0446   | NA       | 0.97921 | 0       | 0.97463 | 2.03943 | 14.4242 | 2.98224 | Up   |
| Was       | 615.356 | 0.58421 | 0.21713 | 2.69061 | 0.00713  | 0.04821  | 467.084 | 611.586 | 398.623 | 688.308 | 894.299 | 632.234 | Up   |
| Ebp       | 3815.64 | -0.3337 | 0.11382 | -2.9315 | 0.00337  | 0.02807  | 4128.36 | 3934.87 | 4701.6  | 3403.81 | 3174.35 | 3550.85 | Down |
| Porcn     | 3387.91 | -0.9363 | 0.16543 | -5.6596 | 1.52E-08 | 1.07E-06 | 3997.15 | 3998.99 | 5354.6  | 2532.97 | 2013.2  | 2430.52 | Down |
| Cybb      | 8301.35 | 1.64484 | 0.2993  | 5.49561 | 3.89E-08 | 2.42E-06 | 3380.24 | 5900.82 | 2787.43 | 9239.64 | 16789.7 | 11710.2 | Up   |
| Sytl5     | 23.963  | -1.7872 | 0.64197 | -2.784  | 0.00537  | 0.03933  | 27.418  | 23.6743 | 60.4269 | 9.17743 | 6.18179 | 16.8993 | Down |
| Srpx      | 324.175 | -0.4659 | 0.02043 | -2.3015 | 0.02136  | 0.10682  | 360.35  | 308.752 | 459.049 | 299.796 | 259.635 | 257.466 | Down |
| Pgpr      | 2057.53 | -0.5918 | 0.22887 | -2.5859 | 0.00971  | 0.06046  | 2696.75 | 1834.76 | 2889.77 | 1777.36 | 1222.96 | 1923.54 | Down |
| Bcor      | 2391.04 | 0.29454 | 0.13398 | 2.19833 | 0.02793  | 0.12855  | 2023.05 | 2394.06 | 2026.25 | 2502.38 | 2960.05 | 2440.46 | Up   |
| Atp6ap2   | 8288    | 0.25955 | 0.09351 | 2.77562 | 0.00551  | 0.04009  | 7781.8  | 7668.5  | 7183    | 9084.64 | 9539.53 | 8470.54 | Up   |
| Gm14634   | 51.7352 | -0.7768 | 0.32933 | -2.3587 | 0.01834  | 0.09644  | 65.6073 | 70.0365 | 60.4269 | 36.7097 | 30.909  | 46.7217 | Down |
| Gm14506   | 17.209  | 1.54049 | 0.68057 | 2.26352 | 0.0236   | 0.11398  | 10.7713 | 3.94572 | 11.6955 | 32.6309 | 13.3939 | 30.8164 | Up   |
| Maob      | 3114.55 | -0.5773 | 0.17047 | -3.3866 | 0.00071  | 0.00836  | 3848.31 | 4358.05 | 2982.36 | 2581.92 | 2203.81 | 2712.84 | Down |
| Efhc2     | 122.552 | -1.5099 | 0.33964 | -4.4456 | 8.77E-06 | 0.00025  | 188.988 | 127.249 | 228.063 | 61.1829 | 45.3331 | 84.4967 | Down |
| Rp2       | 3455.37 | 0.28314 | 0.08667 | 3.26679 | 0.00109  | 0.01178  | 3170.69 | 3213.79 | 2967.74 | 3675.05 | 3840.95 | 3863.98 | Up   |
| Ndufb11   | 4110.35 | -0.2198 | 0.11154 | -1.9709 | 0.04874  | 0.18773  | 4686.51 | 4438.93 | 4143.14 | 4121.69 | 3793.56 | 3478.28 | Down |
| Usp11     | 1242.57 | -0.2259 | 0.11087 | -2.0377 | 0.04158  | 0.16908  | 1381.67 | 1220.21 | 1417.11 | 1117.61 | 1149.81 | 1169.04 | Down |
| Elk1      | 670.73  | 0.26526 | 0.11554 | 2.29573 | 0.02169  | 0.10774  | 569.902 | 613.559 | 644.229 | 733.175 | 741.815 | 721.701 | Up   |
| Slc6a14   | 9608.54 | 0.4459  | 0.1468  | 3.03753 | 0.00239  | 0.02163  | 8553.87 | 8966.65 | 8885.68 | 10741.7 | 11039.6 | 11463.7 | Up   |
| Klhl13    | 975.648 | -0.8893 | 0.29709 | -2.9934 | 0.00276  | 0.0241   | 1446.3  | 1673.97 | 681.264 | 690.347 | 738.724 | 623.287 | Down |
| Gm2223    | 121.808 | 0.59387 | 0.26934 | 2.20491 | 0.02746  | 0.1269   | 104.776 | 114.426 | 72.1224 | 141.74  | 128.787 | 168.993 | Up   |
| Dock11    | 940.042 | 0.4846  | 0.1339  | 3.61917 | 0.0003   | 0.00432  | 883.25  | 721.08  | 746.565 | 1018.7  | 1136.42 | 1134.24 | Up   |
| Zcchc12   | 99.7061 | -2.3149 | 0.44139 | -5.2446 | 1.57E-07 | 8.23E-06 | 234.032 | 83.8465 | 180.306 | 30.5914 | 24.7272 | 44.7335 | Down |
| Pgrmc1    | 16171.9 | -0.5131 | 0.14778 | -3.472  | 0.00052  | 0.00662  | 18819.5 | 16031.5 | 22202   | 14012.9 | 12131.8 | 13833.6 | Down |
| Akap17b   | 413.716 | -0.4498 | 0.2074  | -2.1688 | 0.0301   | 0.13535  | 472.96  | 428.11  | 532.146 | 331.407 | 281.271 | 436.4   | Down |
| Akap14    | 753.638 | -1.1611 | 0.29314 | -3.9608 | 7.47E-05 | 0.00146  | 1385.59 | 848.329 | 890.809 | 458.872 | 305.999 | 632.234 | Down |
| Lamp2     | 33158.7 | 0.25591 | 0.08112 | 3.15481 | 0.00161  | 0.01582  | 29528.2 | 31720.6 | 29427.9 | 34965   | 37109.3 | 36201.4 | Up   |
| Cul4b     | 1984.97 | 0.34246 | 0.10239 | 3.34478 | 0.00082  | 0.00943  | 1763.56 | 1848.57 | 1639.32 | 2122.03 | 2329.5  | 2206.85 | Up   |
| Ap3s1-ps1 | 167.01  | 0.96359 | 0.28768 | 3.34947 | 0.00081  | 0.00931  | 102.817 | 78.9144 | 157.89  | 239.633 | 207.09  | 215.715 | Up   |
| Xiap      | 9796.92 | 0.32298 | 0.08835 | 2.63698 | 0.00836  | 0.05431  | 8927.48 | 9316.83 | 8778.47 | 9915.71 | 10890.3 | 10952.8 | Up   |
| Sh2d1a    | 50.2719 | -0.7675 | 0.33502 | -2.2908 | 0.02198  | 0.10868  | 63.6488 | 51.2943 | 75.0463 | 40.7886 | 36.0604 | 34.7927 | Down |
| Apln      | 1564.18 | -0.585  | 0.21347 | -2.7406 | 0.00613  | 0.04344  | 1590.24 | 2464.1  | 1576.95 | 1167.57 | 1120.96 | 1465.27 | Down |
| Sash3     | 1207.28 | 0.67359 | 0.22118 | 3.04542 | 0.00232  | 0.02117  | 753.015 | 1256.71 | 781.651 | 1505.1  | 1634.05 | 1313.18 | Up   |
| Zdhhc9    | 3079.7  | 0.95069 | 0.14652 | 6.48836 | 8.68E-11 | 9.49E-09 | 2217.92 | 2356.58 | 1726.06 | 3913.67 | 4331.37 | 3932.57 | Up   |
| Bcor1     | 690.261 | 0.24696 | 0.12092 | 2.04232 | 0.04112  | 0.16777  | 621.8   | 676.691 | 595.497 | 790.279 | 734.603 | 722.695 | Up   |
| Elf4      | 1616.54 | 0.41716 | 0.14513 | 2.8743  | 0.00405  | 0.03193  | 1256.33 | 1583.22 | 1313.8  | 1644.8  | 2016.29 | 1884.77 | Up   |
| Aifm1     | 2048.88 | -0.2312 | 0.08584 | -2.6939 | 0.00706  | 0.04782  | 2221.83 | 2219.47 | 2196.81 | 1949.69 | 1882.36 | 1823.14 | Down |
| Slc25a14  | 605.789 | -0.4221 | 0.16985 | -2.4851 | 0.01295  | 0.0747   | 716.784 | 577.061 | 787.499 | 561.863 | 464.665 | 526.862 | Down |
| Rap2c     | 3650.87 | 0.27079 | 0.11654 | 2.32349 | 0.02015  | 0.10275  | 3197.13 | 3652.75 | 3077.87 | 3732.16 | 4281.92 | 3963.39 | Up   |
| Hs6st2    | 550.811 | -0.803  | 0.33628 | -2.3878 | 0.01695  | 0.09143  | 503.315 | 581.007 | 1016.54 | 399.728 | 256.544 | 547.737 | Down |
| Rps2-ps1  | 85.2954 | -0.6181 | 0.284   | -2.1763 | 0.02954  | 0.13362  | 89.1084 | 124.29  | 96.4881 | 79.5378 | 58.727  | 63.621  | Down |
| Fam122b   | 650.002 | 0.51828 | 0.1935  | 2.6785  | 0.0074   | 0.04947  | 491.565 | 637.234 | 474.643 | 663.834 | 917.996 | 714.742 | Up   |
| Rtl8a     | 1098.66 | -0.4061 | 0.16916 | -2.401  | 0.01635  | 0.08903  | 1336.63 | 1309.98 | 1110.1  | 937.118 | 1114.78 |         |      |

|          |         |         |         |         |          |          |         |         |         |         |         |         |      |
|----------|---------|---------|---------|---------|----------|----------|---------|---------|---------|---------|---------|---------|------|
| Map7d3   | 97.6394 | 0.80884 | 0.28968 | 2.79214 | 0.00524  | 0.0387   | 63.6488 | 91.738  | 57.503  | 128.484 | 139.09  | 105.372 | Up   |
| Gm364    | 7.94917 | 4.5429  | 1.27086 | 3.57465 | 0.00035  | 0.0049   | 0.97921 | 0.98643 | 0       | 12.2366 | 19.5757 | 13.9171 | Up   |
| F9       | 22.4576 | 1.90499 | 0.63115 | 3.0183  | 0.00254  | 0.02268  | 17.6258 | 3.94572 | 6.82239 | 36.7097 | 29.8787 | 39.7631 | Up   |
| Gm5637   | 226.828 | 0.65567 | 0.20202 | 3.24554 | 0.00117  | 0.01248  | 173.321 | 188.408 | 166.661 | 293.678 | 314.241 | 224.662 | Up   |
| Sms-ps   | 784.18  | -0.3881 | 0.11723 | -3.3107 | 0.00093  | 0.01039  | 922.418 | 826.628 | 918.099 | 681.17  | 645.997 | 710.766 | Down |
| Prrg3    | 9444.64 | 0.47965 | 0.07986 | 6.00578 | 1.90E-09 | 1.59E-07 | 7990.38 | 7863.82 | 7812.61 | 11480   | 10526.6 | 10994.5 | Up   |
| Gabre    | 549.138 | -0.9379 | 0.35788 | -2.6207 | 0.00878  | 0.0562   | 652.156 | 413.314 | 1099.38 | 429.3   | 250.363 | 450.318 | Down |
| Cetn2    | 4109.7  | -0.3416 | 0.14595 | -2.3406 | 0.01925  | 0.09967  | 5062.53 | 3867.79 | 4851.69 | 3895.31 | 3236.17 | 3744.69 | Down |
| Xlr3a    | 219.025 | 2.61246 | 0.46229 | 5.65116 | 1.59E-08 | 1.10E-06 | 41.1269 | 109.494 | 34.112  | 541.469 | 239.029 | 348.922 | Up   |
| Xlr5a    | 12.4499 | 1.8007  | 0.76635 | 2.34971 | 0.01879  | 0.09806  | 1.95843 | 5.91858 | 8.77165 | 16.3154 | 27.8181 | 13.9171 | Up   |
| Dusp9    | 46.8118 | 0.78801 | 0.38192 | 2.06326 | 0.03909  | 0.16252  | 26.4387 | 45.3758 | 31.1881 | 53.0252 | 73.1512 | 51.6921 | Up   |
| Abcd1    | 3383.43 | 0.30478 | 0.1391  | 2.19104 | 0.02845  | 0.13038  | 2683.04 | 3219.71 | 3179.23 | 3689.33 | 4217.01 | 3312.27 | Up   |
| Renbp    | 4574.2  | 0.43512 | 0.15884 | 2.7393  | 0.00616  | 0.04355  | 3701.42 | 4620.44 | 3346.87 | 5309.66 | 5801.61 | 4665.21 | Up   |
| Flna     | 22029   | 0.37008 | 0.115   | 3.21822 | 0.00129  | 0.01339  | 19278.7 | 19227.5 | 19150.5 | 23605.4 | 28228.1 | 22683.9 | Up   |
| Dnase1l1 | 2581.59 | 0.3264  | 0.12418 | 2.6283  | 0.00858  | 0.05534  | 2134.68 | 2611.08 | 2126.64 | 2931.68 | 2949.74 | 2735.7  | Up   |
| Atp6ap1  | 14992   | 0.28071 | 0.10031 | 2.79846 | 0.00513  | 0.03814  | 13577.8 | 13934.3 | 13101.9 | 16487.8 | 17786   | 15064.3 | Up   |
| Ikbkg    | 3631.54 | -0.4178 | 0.1607  | -2.6001 | 0.00932  | 0.05858  | 4034.36 | 3451.52 | 4975.47 | 3007.14 | 2923.99 | 3396.77 | Down |
| Dkc1     | 1385.36 | 0.34213 | 0.12833 | 2.66612 | 0.00767  | 0.05083  | 1225    | 1309.98 | 1130.57 | 1433.72 | 1726.78 | 1486.15 | Up   |
| Mpp1     | 4428.91 | 0.30669 | 0.12314 | 2.49061 | 0.01275  | 0.0738   | 3669.11 | 4345.22 | 3865.37 | 4786.54 | 5408.04 | 4499.2  | Up   |
| Cfap47   | 569.051 | -0.8144 | 0.20953 | -3.8867 | 0.0001   | 0.00189  | 897.938 | 571.143 | 707.579 | 405.847 | 360.604 | 471.193 | Down |
| Actr3-ps | 552.599 | 0.63507 | 0.13152 | 4.82853 | 1.38E-06 | 5.26E-05 | 463.168 | 431.07  | 404.47  | 626.105 | 708.845 | 681.938 | Up   |
| Gk       | 2674.63 | 0.62489 | 0.09003 | 6.9408  | 3.90E-12 | 5.46E-10 | 2093.56 | 2217.49 | 2001.88 | 3222.3  | 3205.26 | 3307.3  | Up   |
| 5430427C | 191.472 | 0.8217  | 0.28372 | 2.89615 | 0.00378  | 0.03048  | 124.36  | 190.381 | 100.387 | 261.047 | 267.878 | 204.78  | Up   |
| Pcyl1b   | 608.122 | -0.7663 | 0.37711 | -2.032  | 0.04215  | 0.1706   | 938.086 | 422.192 | 937.591 | 478.246 | 249.332 | 623.287 | Down |
| Eif2s3x  | 1988.36 | 0.53355 | 0.22731 | 2.34721 | 0.01891  | 0.09844  | 2042.64 | 1758.8  | 1073.06 | 2186.27 | 2386.17 | 2483.21 | Up   |
| Apoo     | 999.889 | -0.4046 | 0.17823 | -2.2699 | 0.02321  | 0.11281  | 1359.15 | 887.787 | 1170.53 | 891.231 | 868.542 | 822.103 | Down |
| Msn      | 58777.5 | 0.28385 | 0.12307 | 2.30644 | 0.02109  | 0.10605  | 48030.4 | 58898.7 | 52112.3 | 61505.1 | 71023.6 | 61095.1 | Up   |
| Vsig4    | 33.9164 | -0.8973 | 0.40018 | -2.2423 | 0.02494  | 0.11857  | 47.0022 | 50.3079 | 35.0866 | 21.414  | 27.8181 | 21.8697 | Down |
| Ar       | 462.916 | -0.4428 | 0.20014 | -2.2123 | 0.02695  | 0.12526  | 448.479 | 627.369 | 524.349 | 470.089 | 351.332 | 355.88  | Down |
| Yipf6    | 9202.29 | 0.21651 | 0.10396 | 2.0827  | 0.03728  | 0.15722  | 8803.12 | 8713.13 | 8023.13 | 9422.17 | 9439.59 | 10812.6 | Up   |
| Awat1    | 346.479 | 7.03865 | 0.43825 | 16.0607 | 4.81E-58 | 3.03E-54 | 1.95843 | 11.8372 | 1.94925 | 635.282 | 603.755 | 624.091 | Up   |
| Gdpd2    | 318.064 | -1.2775 | 0.29603 | -4.3154 | 1.59E-05 | 0.00041  | 526.816 | 395.558 | 428.836 | 157.036 | 127.757 | 272.378 | Down |
| Slc7a3   | 201.598 | -0.6781 | 0.23519 | -2.8833 | 0.00393  | 0.03132  | 295.722 | 192.354 | 256.327 | 168.253 | 132.908 | 164.023 | Down |
| Med12    | 2194.78 | 0.23434 | 0.09695 | 2.41715 | 0.01564  | 0.08614  | 2048.51 | 2083.34 | 1919.04 | 2248.47 | 2385.14 | 2484.2  | Up   |
| Gjb1     | 381.587 | 1.2244  | 0.31883 | 3.84034 | 0.00012  | 0.0022   | 346.641 | 192.354 | 147.169 | 532.291 | 634.664 | 436.4   | Up   |
| Cited1   | 51.1562 | -1.2022 | 0.50266 | -2.3916 | 0.01677  | 0.09077  | 76.3786 | 98.643  | 38.9851 | 18.3549 | 28.8484 | 45.7276 | Down |
| Phka1    | 3353.34 | 0.40428 | 0.08711 | 4.64112 | 3.47E-06 | 0.00011  | 2792.71 | 2996.77 | 2870.28 | 3699.53 | 3788.41 | 3972.34 | Up   |
| Dmrtc1a  | 39.9724 | -0.8098 | 0.39492 | -2.0505 | 0.04031  | 0.16567  | 53.8567 | 36.4979 | 62.3761 | 29.5717 | 24.7272 | 32.8046 | Down |
| 4930519F | 6.51696 | 2.23336 | 1.06152 | 2.10394 | 0.03538  | NA       | 3.91685 | 1.97286 | 0.97463 | 11.2169 | 4.12119 | 16.8993 | Up   |
| Slc16a2  | 2294.18 | -0.3976 | 0.16051 | -2.477  | 0.01325  | 0.07597  | 2542.04 | 3139.81 | 2143.21 | 1997.62 | 1891.63 | 2050.78 | Down |
| Rlim     | 4950.14 | 0.35878 | 0.10323 | 3.47553 | 0.00051  | 0.00655  | 4041.21 | 4362.98 | 4609.01 | 5352.48 | 5957.19 | 5377.96 | Up   |
| Nexmif   | 1059.59 | 0.27606 | 0.11912 | 2.31754 | 0.02047  | 0.1039   | 1018.38 | 855.234 | 1001.92 | 1139.02 | 1157.03 | 1185.94 | Up   |
| Atrx     | 8087.91 | 0.26269 | 0.09096 | 2.8881  | 0.00388  | 0.03103  | 7220.71 | 7789.83 | 7050.45 | 8558.47 | 8643.17 | 9264.81 | Up   |
| Atp7a    | 273.932 | 0.97053 | 0.28011 | 3.46476 | 0.00053  | 0.00675  | 236.969 | 139.087 | 179.331 | 293.678 | 318.362 | 476.164 | Up   |
| Tlr13    | 953.973 | 1.76592 | 0.22556 | 7.82891 | 4.92E-15 | 1.31E-12 | 380.914 | 540.563 | 379.13  | 1359.28 | 1872.05 | 1191.9  | Up   |
| Rtl3     | 3.76814 | -3.3386 | 1.61178 | -2.0714 | 0.03832  | NA       | 11.7506 | 3.94572 | 4.87314 | 2.03943 | 0       | 0       | Down |
| Lpar4    | 85.5989 | -0.747  | 0.32564 | -2.2938 | 0.0218   | 0.10815  | 104.776 | 140.073 | 76.9956 | 53.0252 | 72.1209 | 66.6033 | Down |
| P2ry10b  | 351.284 | 1.18032 | 0.2725  | 4.33142 | 1.48E-05 | 0.00038  | 148.84  | 273.241 | 223.19  | 454.793 | 611.997 | 395.643 | Up   |
| Gm14834  | 9.08887 | 1.86028 | 0.82684 | 2.24986 | 0.02446  | 0.11691  | 1.95843 | 5.91858 | 3.89851 | 11.2169 | 20.606  | 10.9349 | Up   |
| Brwd3    | 1166    | 0.36891 | 0.10067 | 3.66453 | 0.00025  | 0.00378  | 1031.11 | 1034.76 | 987.297 | 1252.21 | 1375.45 | 1315.17 | Up   |
| Rps6ka6  | 146.695 | -0.5634 | 0.25517 | -2.2079 | 0.02725  | 0.12602  | 161.57  | 155.856 | 207.596 | 115.228 | 94.7875 | 145.135 | Down |
| Pof1b    | 2240.39 | -0.3542 | 0.15523 | -2.2818 | 0.0225   | 0.11031  | 2878.89 | 2587.4  | 2075.96 | 2026.17 | 1781.39 | 2092.54 | Down |
| Btk      | 819.817 | 0.86796 | 0.19325 | 4.49144 | 7.07E-06 | 0.00021  | 509.191 | 739.822 | 492.187 | 975.867 | 1158.06 | 1043.78 | Up   |
| Gla      | 1100.29 | 0.8373  | 0.16549 | 5.0596  | 4.20E-07 | 1.92E-05 | 730.493 | 906.529 | 731.945 | 1324.61 | 1653.63 | 1254.53 | Up   |
| Armxc4   | 1246.77 | 0.62715 | 0.18803 | 3.33533 | 0.00085  | 0.00969  | 866.603 | 1252.77 | 820.636 | 1420.46 | 1491.87 | 1628.3  | Up   |
| Nxf2     | 7.88763 | 2.12554 | 0.88366 | 2.40537 | 0.01616  | 0.08829  | 1.95843 | 3.94572 | 2.92388 | 7.138   | 15.4545 | 15.9053 | Up   |
| Nxf7     | 25.3767 | 1.78028 | 0.59736 | 2.98023 | 0.00288  | 0.0249   | 6.85449 | 15.7829 | 11.6955 | 62.2026 | 29.8787 | 25.846  | Up   |
| Bhlhb9   | 626.208 | -0.5037 | 0.12343 | -4.0808 | 4.49E-05 | 0.00095  | 797.079 | 720.094 | 686.138 | 515.976 | 513.089 | 524.873 | Down |
| Arxes2   | 526.31  | -0.5627 | 0.17982 | -3.1294 | 0.00175  | 0.01691  | 659.989 | 633.288 | 589.65  | 514.956 | 410.059 | 349.916 | Down |
| Bex2     | 727.396 | 1.31632 | 0.2417  | 5.44601 | 5.15E-08 | 3.11E-06 | 434.77  | 313.685 | 501.933 | 1324.61 | 821.148 | 968.232 | Up   |
| Bex4     | 272.664 | 1.023   | 0.29674 | 3.44742 | 0.00057  | 0.0071   | 132.194 | 158.815 | 248.53  | 447.655 | 273.029 | 375.762 | Up   |
| Tceal9   | 14159.4 | 0.52231 | 0.1091  | 4.78758 | 1.69E-06 | 6.21E-05 | 10886.9 | 12557.2 | 11427.5 | 18047.9 | 16528   | 15508.6 | Up   |
| Bex3     | 4975.04 | 0.66624 | 0.10598 | 6.28655 | 3.25E-10 | 3.10E-08 | 3585.88 | 4150.9  | 3802.02 | 6346.71 | 6277.61 | 5687.12 | Up   |
| Tceal1   | 804.594 | -0.457  | 0.13411 | -3.4079 | 0.00065  | 0.00794  | 967.462 | 990.375 | 835.256 | 699.524 | 619.209 | 715.737 | Down |
| Plp1     | 212.131 | -0.5753 | 0.16615 | -3.4628 | 0.00053  | 0.00679  | 249.699 | 269.295 | 242.682 | 172.332 | 163.817 | 174.958 | Down |
| Fam199x  | 917.776 | 0.20924 | 0.10215 | 2.04833 | 0.04053  | 0.16615  | 815.684 | 865.099 | 873.266 | 999.321 | 959.208 | 994.079 | Up   |
| Serpina7 | 85.0538 | -1.1322 | 0.38241 | -2.9606 | 0.00307  | 0.02617  | 85.1915 | 97.6565 | 167.636 | 39.7689 | 50.4846 | 69.5855 | Down |
| Pwwp3b   | 244.394 | -1.1623 | 0.22398 | -5.1894 | 2.11E-07 | 1.06E-05 | 359.371 | 264.363 | 389.851 | 137.662 | 141.151 | 173.964 | Down |
| Platr21  | 262.813 | -0.4057 | 0.18962 | -2.1398 | 0.03237  | 0.14249  | 255.575 | 298.888 | 344.043 | 238.613 | 236.969 | 202.792 | Down |
| Radx     | 151.707 | 1.7052  | 0.24211 | 7.04293 | 1.88E-12 | 2.92E-10 | 63.6488 | 70.0365 | 79.9194 | 195.785 | 278.181 | 222.674 | Up   |
| Rnf128   | 4120.69 | 0.96087 | 0.1954  | 4.91732 | 8.77E-07 | 3.56E-05 | 3121.73 | 1990.61 | 3278.65 | 5348.4  | 5801.61 | 5183.13 | Up   |
| Tbc1d8b  | 1224.32 | 0.53124 | 0.11294 | 4.70393 | 2.55E-06 | 8.87E-05 | 1069.3  | 1013.06 | 921.997 | 1446.98 | 1380.6  | 1513.98 | Up   |
| Ripply1  | 3.75855 | -4.3052 | 1.72789 | -2.4916 | 0.01272  | NA       | 1.95843 | 8.87787 | 10.7209 | 0       | 0       | 0.99408 | Down |
| Cldn2    | 1072.79 | -1.311  | 0.24596 | -5.3303 | 9.81E-08 | 5.47E-06 | 1624.51 | 1266.58 | 1696.83 | 545.547 | 453.331 | 849.937 | Down |
| Nup62cl  | 389.621 | 0.44989 | 0.22518 | 1.99789 | 0.04573  | 0.17986  | 322.161 | 265.35  | 400.572 | 516.995 | 356.483 | 476.164 | Up   |
| Pih1h3b  | 282.279 | -1.2868 | 0.35562 | -3.6185 | 0.0003   | 0.00433  | 496.461 | 266.336 | 438.582 | 199.864 | 89.636  | 202.792 | Down |
| Prps1    | 2387.78 | -0.2577 | 0.0829  | -3.109  | 0.00188  | 0.01781  | 2529.31 | 2639.69 | 2632.47 | 2207.68 | 2185    |         |      |

|           |         |         |         |         |          |          |         |         |         |         |         |         |      |
|-----------|---------|---------|---------|---------|----------|----------|---------|---------|---------|---------|---------|---------|------|
| Kdm5c     | 4324.52 | 0.39999 | 0.19743 | 2.02603 | 0.04276  | 0.1722   | 4340.85 | 4229.81 | 2615.9  | 4795.72 | 5011.37 | 4953.49 | Up   |
| Mageh1    | 670.867 | -0.3697 | 0.13287 | -2.7827 | 0.00539  | 0.03945  | 835.268 | 746.727 | 687.112 | 614.888 | 565.634 | 575.571 | Down |
| Kctd12b   | 819.828 | 0.58816 | 0.1688  | 3.48442 | 0.00049  | 0.00638  | 730.493 | 700.365 | 534.096 | 937.118 | 1100.36 | 916.54  | Up   |
| Sat1      | 16842.4 | 0.53129 | 0.10681 | 4.97412 | 6.55E-07 | 2.79E-05 | 12920.7 | 13358.2 | 15048.2 | 20755.3 | 20451.4 | 18520.7 | Up   |
| Acot9     | 2802.66 | 0.29616 | 0.14073 | 2.10446 | 0.03534  | 0.1516   | 2535.18 | 2786.66 | 2226.05 | 3034.67 | 3463.86 | 2769.5  | Up   |
| Phex      | 384.396 | 0.9007  | 0.28861 | 3.1208  | 0.0018   | 0.01728  | 318.244 | 322.562 | 163.737 | 478.246 | 415.21  | 608.376 | Up   |
| Sms       | 2967.96 | -0.4023 | 0.10774 | -3.7335 | 0.00019  | 0.00305  | 3534.96 | 3118.1  | 3484.29 | 2541.13 | 2399.57 | 2729.74 | Down |
| Cnksr2    | 102.007 | -1.2023 | 0.53281 | -2.2565 | 0.02404  | 0.1156   | 126.318 | 97.6565 | 202.722 | 69.3406 | 19.5757 | 96.4256 | Down |
| Rps6ka3   | 5133.18 | 0.35265 | 0.13387 | 2.6343  | 0.00843  | 0.05466  | 5036.09 | 4540.54 | 3950.16 | 5181.17 | 6055.06 | 6036.04 | Up   |
| Syap1     | 6184.8  | 0.2031  | 0.09128 | 2.22517 | 0.02607  | 0.12242  | 5795.96 | 5926.47 | 5528.09 | 6221.28 | 6962.76 | 6674.24 | Up   |
| Rnf138rt1 | 79.5437 | -0.9778 | 0.36217 | -2.6998 | 0.00694  | 0.04726  | 136.111 | 98.643  | 81.8687 | 47.9266 | 39.1513 | 73.5618 | Down |
| Ace2      | 1460.12 | -0.5882 | 0.26834 | -2.192  | 0.02838  | 0.13011  | 1312.15 | 1789.38 | 2159.77 | 1225.7  | 771.694 | 1502.05 | Down |
| Bmx       | 643.891 | -0.5184 | 0.19285 | -2.688  | 0.00719  | 0.0485   | 839.185 | 588.898 | 846.951 | 574.099 | 459.513 | 554.696 | Down |
| Pir       | 2526.44 | -0.6965 | 0.2725  | -2.5559 | 0.01059  | 0.06463  | 3540.83 | 2053.75 | 3779.6  | 2114.89 | 1340.42 | 2329.13 | Down |
| Piga      | 1055.8  | 0.29712 | 0.14117 | 2.10465 | 0.03532  | 0.15157  | 1038.94 | 844.384 | 959.033 | 1033.99 | 1246.66 | 1211.78 | Up   |
| Asb11     | 161.677 | 1.21277 | 0.41247 | 2.94026 | 0.00328  | 0.02742  | 97.9213 | 121.331 | 73.097  | 194.766 | 362.665 | 120.284 | Up   |
| Gm15226   | 4.05201 | 5.49058 | 1.67277 | 3.28232 | 0.00103  | NA       | 0       | 0       | 0       | 5.09857 | 9.27269 | 9.94079 | Up   |
| Gm15228   | 22.7605 | -1.6183 | 0.58844 | -2.7501 | 0.00596  | 0.04252  | 23.5011 | 45.3758 | 34.112  | 6.11829 | 17.5151 | 9.94079 | Down |
| Tlr8      | 413.119 | 1.71311 | 0.3875  | 4.4209  | 9.83E-06 | 0.00027  | 231.094 | 271.268 | 76.9956 | 536.37  | 709.876 | 653.11  | Up   |
| Tlr7      | 974.402 | 1.35154 | 0.31158 | 4.33771 | 1.44E-05 | 0.00037  | 496.461 | 773.361 | 376.206 | 1091.09 | 1974.05 | 1135.24 | Up   |
| Erdr1     | 276.347 | 1.81903 | 0.50973 | 3.56862 | 0.00036  | 0.00498  | 107.713 | 94.6972 | 163.737 | 685.248 | 121.575 | 485.11  | Up   |
| Mid1-ps1  | 8.18129 | 2.62653 | 1.26719 | 2.07272 | 0.0382   | 0.15999  | 0.97921 | 0.98643 | 4.87314 | 18.3549 | 1.0303  | 22.8638 | Up   |

**Supplementary Table 4** KEGG pathways enriched from DEGs between the ELF3<sup>OV</sup> vs WT groups

| ID      | Descriptio   | GeneRatic | BgRatio  | pvalue   | p.adjust | qvalue   | geneID      | Count |
|---------|--------------|-----------|----------|----------|----------|----------|-------------|-------|
| mmu0482 | Cytoskelet   | 68/1091   | 232/9773 | 1.87E-14 | 6.24E-12 | 4.64E-12 | Fhl2/Myl1   | 68    |
| mmu0532 | Rheumato     | 34/1091   | 87/9773  | 1.21E-11 | 2.02E-09 | 1.50E-09 | Il17a/Cd28  | 34    |
| mmu0406 | Cytokine-    | 68/1091   | 294/9773 | 2.33E-09 | 2.59E-07 | 1.92E-07 | Il17a/Il1r1 | 68    |
| mmu0406 | Viral prote  | 32/1091   | 95/9773  | 4.01E-09 | 3.34E-07 | 2.48E-07 | Ccl20/Cxc   | 32    |
| mmu0466 | T cell rece  | 37/1091   | 122/9773 | 6.67E-09 | 4.44E-07 | 3.30E-07 | Cd28/Ctla   | 37    |
| mmu0541 | Hypertrop    | 31/1091   | 100/9773 | 6.37E-08 | 3.53E-06 | 2.62E-06 | Des/Tnnt2   | 31    |
| mmu0462 | C-type lec   | 33/1091   | 112/9773 | 9.44E-08 | 4.02E-06 | 2.99E-06 | Stat1/Casp  | 33    |
| mmu0451 | Cell adhes   | 45/1091   | 179/9773 | 9.66E-08 | 4.02E-06 | 2.99E-06 | Cd28/Ctla   | 45    |
| mmu0461 | Antigen p    | 28/1091   | 87/9773  | 1.14E-07 | 4.04E-06 | 3.00E-06 | Pdia3/Ctss  | 28    |
| mmu0481 | Motor pro    | 48/1091   | 198/9773 | 1.21E-07 | 4.04E-06 | 3.00E-06 | Myl1/Kif1a  | 48    |
| mmu0465 | Th1 and T    | 28/1091   | 88/9773  | 1.49E-07 | 4.51E-06 | 3.35E-06 | Stat1/Cd2   | 28    |
| mmu0541 | Dilated ca   | 30/1091   | 103/9773 | 4.75E-07 | 1.23E-05 | 9.15E-06 | Des/Tnnt2   | 30    |
| mmu0438 | Osteoclast   | 36/1091   | 136/9773 | 4.81E-07 | 1.23E-05 | 9.15E-06 | Fhl2/Stat1  | 36    |
| mmu0541 | Viral myoc   | 28/1091   | 94/9773  | 6.88E-07 | 1.56E-05 | 1.16E-05 | Casp8/Cd    | 28    |
| mmu0426 | Cardiac m    | 27/1091   | 89/9773  | 7.25E-07 | 1.56E-05 | 1.16E-05 | Tnnt2/Tpr   | 27    |
| mmu0465 | Th17 cell    | 30/1091   | 105/9773 | 7.48E-07 | 1.56E-05 | 1.16E-05 | Il17a/Stat1 | 30    |
| mmu0514 | Leishmani    | 23/1091   | 70/9773  | 1.01E-06 | 1.99E-05 | 1.48E-05 | Stat1/Ptgs  | 23    |
| mmu0464 | Hematopc     | 27/1091   | 94/9773  | 2.37E-06 | 4.39E-05 | 3.26E-05 | Il2ra/Cd44  | 27    |
| mmu0414 | Phagosom     | 42/1091   | 183/9773 | 3.43E-06 | 6.01E-05 | 4.47E-05 | Rab7b/Nc    | 42    |
| mmu0406 | Chemokin     | 43/1091   | 193/9773 | 5.94E-06 | 9.89E-05 | 7.34E-05 | Stat1/Ccl2  | 43    |
| mmu0465 | Natural kil  | 31/1091   | 122/9773 | 7.44E-06 | 0.000118 | 8.76E-05 | Cd247/Shc   | 31    |
| mmu0466 | Fc gamma     | 26/1091   | 94/9773  | 7.79E-06 | 0.000118 | 8.76E-05 | Arpc2/Act   | 26    |
| mmu0515 | Tuberculo    | 40/1091   | 180/9773 | 1.33E-05 | 0.000193 | 0.000143 | Stat1/Casp  | 40    |
| mmu0326 | Virion - H   | 7/1091    | 10/9773  | 1.88E-05 | 0.000255 | 0.00019  | Cxcr4/Cd4   | 7     |
| mmu0402 | Calcium si   | 51/1091   | 254/9773 | 1.92E-05 | 0.000255 | 0.00019  | Erb4/Cxc    | 51    |
| mmu0492 | Adipocyto    | 21/1091   | 72/9773  | 2.39E-05 | 0.000306 | 0.000228 | Rxrg/Prkc   | 21    |
| mmu0426 | Adrenergi    | 35/1091   | 156/9773 | 3.67E-05 | 0.000453 | 0.000336 | Tnnt2/Scn   | 35    |
| mmu0411 | Cell cycle   | 35/1091   | 157/9773 | 4.23E-05 | 0.000503 | 0.000374 | Mcm3/Mc     | 35    |
| mmu0033 | Arginine a   | 17/1091   | 54/9773  | 4.83E-05 | 0.000555 | 0.000412 | Gatm/Aldl   | 17    |
| mmu0402 | cAMP sigr    | 45/1091   | 224/9773 | 5.78E-05 | 0.000641 | 0.000476 | Grin1/Myl   | 45    |
| mmu0523 | PD-L1 exp    | 23/1091   | 88/9773  | 6.83E-05 | 0.000733 | 0.000545 | Stat1/Cd2   | 23    |
| mmu0494 | Type I dial  | 19/1091   | 67/9773  | 8.83E-05 | 0.000919 | 0.000682 | Cd28/Cpe    | 19    |
| mmu0466 | TNF signa    | 27/1091   | 118/9773 | 0.000196 | 0.001974 | 0.001466 | Casp8/Ccl   | 27    |
| mmu0513 | Legionell    | 17/1091   | 60/9773  | 0.000207 | 0.001974 | 0.001466 | Casp8/Eef   | 17    |
| mmu0533 | Graft-vers   | 17/1091   | 60/9773  | 0.000207 | 0.001974 | 0.001466 | Cd28/Klrd   | 17    |
| mmu0406 | NF-kappa     | 25/1091   | 107/9773 | 0.000237 | 0.002188 | 0.001625 | Tnfrsf11a/  | 25    |
| mmu0516 | Human T-     | 46/1091   | 247/9773 | 0.000308 | 0.002775 | 0.002062 | Il2ra/Spi1/ | 46    |
| mmu0514 | Toxoplasn    | 25/1091   | 109/9773 | 0.000321 | 0.002812 | 0.002089 | Stat1/Casp  | 25    |
| mmu0534 | Primary in   | 12/1091   | 36/9773  | 0.000343 | 0.002925 | 0.002173 | Icos/Ptprc  | 12    |
| mmu0516 | Epstein-B    | 43/1091   | 228/9773 | 0.000362 | 0.003016 | 0.002241 | Stat1/Casp  | 43    |
| mmu0541 | Arrhythmc    | 21/1091   | 86/9773  | 0.000387 | 0.00314  | 0.002333 | Des/Igta1   | 21    |
| mmu0401 | MAPK sigr    | 53/1091   | 299/9773 | 0.000398 | 0.003158 | 0.002346 | Erb4/Ptp    | 53    |
| mmu0002 | Citrate cyc  | 11/1091   | 32/9773  | 0.000446 | 0.003457 | 0.002568 | Pck1/Suck   | 11    |
| mmu0533 | Allograft r  | 16/1091   | 60/9773  | 0.000666 | 0.005039 | 0.003743 | Cd28/Il12l  | 16    |
| mmu0466 | B cell rece  | 20/1091   | 84/9773  | 0.000746 | 0.005524 | 0.004103 | Fcgr2b/Da   | 20    |
| mmu0532 | Inflammat    | 16/1091   | 62/9773  | 0.000982 | 0.007003 | 0.005202 | Il17a/Stat1 | 16    |
| mmu0481 | Regulator    | 42/1091   | 232/9773 | 0.001003 | 0.007003 | 0.005202 | Arpc2/Act   | 42    |
| mmu0531 | Asthma -     | 9/1091    | 25/9773  | 0.001009 | 0.007003 | 0.005202 | Fcer1g/Pr   | 9     |
| mmu0427 | Vascular s   | 29/1091   | 144/9773 | 0.001098 | 0.007464 | 0.005544 | Ramp1/Pr    | 29    |
| mmu0492 | Regulator    | 15/1091   | 57/9773  | 0.001127 | 0.007506 | 0.005576 | Ptgs2/Ptg   | 15    |
| mmu0516 | Measles -    | 29/1091   | 145/9773 | 0.00123  | 0.008032 | 0.005967 | Stat1/Casp  | 29    |
| mmu0513 | Salmonell    | 44/1091   | 252/9773 | 0.001639 | 0.010496 | 0.007797 | Casp8/Arp   | 44    |
| mmu0541 | Diabetic c   | 39/1091   | 217/9773 | 0.001715 | 0.010776 | 0.008005 | Ndufs1/N    | 39    |
| mmu0467 | Intestinal i | 12/1091   | 43/9773  | 0.002008 | 0.01238  | 0.009197 | Cd28/Icos   | 12    |
| mmu0517 | Human irr    | 42/1091   | 241/9773 | 0.002144 | 0.012982 | 0.009644 | Casp8/Cxc   | 42    |
| mmu0326 | Virion - FI  | 5/1091    | 10/9773  | 0.002673 | 0.015895 | 0.011807 | Cd209d/C    | 5     |
| mmu0414 | Efferocyto   | 30/1091   | 161/9773 | 0.00321  | 0.018752 | 0.01393  | Rab17/Ral   | 30    |

|                     |         |          |          |          |          |             |    |
|---------------------|---------|----------|----------|----------|----------|-------------|----|
| mmu0332 PPAR sign   | 19/1091 | 89/9773  | 0.003837 | 0.022029 | 0.016364 | Dbi/Rxrg/I  | 19 |
| mmu0513 Yersinia in | 26/1091 | 136/9773 | 0.004098 | 0.02313  | 0.017182 | Arpc2/Act   | 26 |
| mmu0463 JAK-STAT    | 31/1091 | 171/9773 | 0.004255 | 0.023615 | 0.017542 | Stat1/Il2ra | 31 |
| mmu0514 Chagas di   | 21/1091 | 103/9773 | 0.004344 | 0.023717 | 0.017618 | Casp8/Cd    | 21 |
| mmu0462 Toll-like r | 21/1091 | 104/9773 | 0.004887 | 0.026248 | 0.019498 | Stat1/Casp  | 21 |
| mmu0493 Type II dia | 12/1091 | 48/9773  | 0.005401 | 0.028548 | 0.021207 | Pik3cd/Ma   | 12 |
| mmu0123 Biosynthe   | 17/1091 | 79/9773  | 0.005568 | 0.028972 | 0.021522 | Rpe/Ass1/   | 17 |
| mmu0022 Arginine t  | 7/1091  | 21/9773  | 0.00601  | 0.03079  | 0.022872 | Ass1/Nos1   | 7  |
| mmu0465 IL-17 sign  | 19/1091 | 93/9773  | 0.006337 | 0.031972 | 0.023751 | Il17a/Casp  | 19 |
| mmu0493 Non-alcol   | 29/1091 | 162/9773 | 0.006679 | 0.033195 | 0.024659 | Casp8/Nd    | 29 |
| mmu0421 Apoptosis   | 25/1091 | 135/9773 | 0.007332 | 0.035905 | 0.026672 | Casp8/Tra   | 25 |
| mmu0326 Virion - E  | 6/1091  | 17/9773  | 0.007973 | 0.037966 | 0.028203 | Fcgr2b/Slc  | 6  |
| mmu0496 Proximal t  | 7/1091  | 22/9773  | 0.007981 | 0.037966 | 0.028203 | Pck1/Atp1   | 7  |
| mmu0532 Autoimmu    | 16/1091 | 76/9773  | 0.00874  | 0.040993 | 0.030452 | Cd28/Ctla   | 16 |
| mmu0025 Alanine, a  | 10/1091 | 39/9773  | 0.008884 | 0.041089 | 0.030523 | Ass1/Nat8   | 10 |
| mmu0493 Insulin res | 21/1091 | 110/9773 | 0.00944  | 0.043062 | 0.031988 | Prkcq/Pyg   | 21 |
| mmu0497 Salivary se | 17/1091 | 87/9773  | 0.014716 | 0.064798 | 0.048135 | Gucy1b1/    | 17 |
| mmu0462 NOD-like    | 35/1091 | 216/9773 | 0.014761 | 0.064798 | 0.048135 | Stat1/Casp  | 35 |
| mmu0056 Ether lipid | 11/1091 | 48/9773  | 0.014789 | 0.064798 | 0.048135 | Pla2g4e/P   | 11 |
| mmu0402 cGMP-PK     | 29/1091 | 172/9773 | 0.01506  | 0.065129 | 0.048381 | Myl9/Gucy   | 29 |
| mmu0411 p53 signal  | 15/1091 | 75/9773  | 0.017296 | 0.073649 | 0.05471  | Casp8/Ste   | 15 |
| mmu0516 Influenza   | 29/1091 | 174/9773 | 0.017472 | 0.073649 | 0.05471  | Stat1/Casp  | 29 |
| mmu0461 Renin-ang   | 9/1091  | 37/9773  | 0.018055 | 0.075152 | 0.055827 | Cpa3/Klk1   | 9  |
| mmu0492 Oxytocin    | 26/1091 | 153/9773 | 0.018737 | 0.077029 | 0.057221 | Ptgs2/Pla2  | 26 |
| mmu0401 Ras signal  | 37/1091 | 236/9773 | 0.020252 | 0.082068 | 0.060964 | Grin1/Ras   | 37 |
| mmu0492 Glucagon    | 19/1091 | 104/9773 | 0.020455 | 0.082068 | 0.060964 | Pygb/Pck1   | 19 |
| mmu0513 Pertussis   | 15/1091 | 77/9773  | 0.021692 | 0.085993 | 0.06388  | Hc/Jun/Cx   | 15 |
| mmu0516 Kaposi sar  | 35/1091 | 223/9773 | 0.023111 | 0.09054  | 0.067258 | Stat1/Casp  | 35 |
| mmu0514 African try | 9/1091  | 39/9773  | 0.025136 | 0.09733  | 0.072301 | Nppa/Ildo   | 9  |
| mmu0541 Lipid and   | 34/1091 | 217/9773 | 0.025461 | 0.097454 | 0.072394 | Casp8/Nct   | 34 |
| mmu0120 Carbon m    | 21/1091 | 122/9773 | 0.028432 | 0.107589 | 0.079922 | Rpe/Phgd    | 21 |
| mmu0056 Glyceroph   | 18/1091 | 101/9773 | 0.029678 | 0.111043 | 0.082488 | Lpgat1/Pla  | 18 |
| mmu0121 2-Oxocar    | 8/1091  | 34/9773  | 0.030375 | 0.112388 | 0.083487 | Dlat/Ildh3a | 8  |
| mmu0001 Glycolysis  | 13/1091 | 67/9773  | 0.032166 | 0.117707 | 0.087438 | Pck1/Aldh   | 13 |
| mmu0497 Mineral at  | 11/1091 | 55/9773  | 0.038221 | 0.138342 | 0.102767 | Slc5a1/Slc  | 11 |
| mmu0491 GnRH sigr   | 16/1091 | 90/9773  | 0.03961  | 0.141831 | 0.105359 | Pla2g4e/P   | 16 |
| mmu0492 Renin secr  | 14/1091 | 76/9773  | 0.040042 | 0.14185  | 0.105373 | Gucy1b1/I   | 14 |
| mmu0415 AMPK sigr   | 21/1091 | 127/9773 | 0.041882 | 0.146807 | 0.109055 | Pck1/Ccna   | 21 |
| mmu0523 Choline m   | 17/1091 | 98/9773  | 0.042596 | 0.147754 | 0.109759 | Pla2g4e/P   | 17 |
| mmu0492 GnRH secr   | 12/1091 | 63/9773  | 0.043795 | 0.150349 | 0.111686 | Kcnn3/Pik   | 12 |
| mmu0471 Circadian   | 17/1091 | 99/9773  | 0.046303 | 0.157335 | 0.116876 | Grin1/Guc   | 17 |
| mmu0062 Pyruvate r  | 9/1091  | 44/9773  | 0.050954 | 0.17139  | 0.127316 | Pck1/Aldh   | 9  |
| mmu0491 Insulin sec | 15/1091 | 86/9773  | 0.052336 | 0.17391  | 0.129189 | Snap25/Kc   | 15 |
| mmu0078 Lipoic acic | 5/1091  | 19/9773  | 0.052748 | 0.17391  | 0.129189 | Acsm1/Dla   | 5  |
| mmu0408 Neuroacti   | 54/1091 | 390/9773 | 0.054139 | 0.176746 | 0.131296 | Gpr35/Sct   | 54 |
| mmu0007 Fatty acid  | 10/1091 | 52/9773  | 0.059022 | 0.188561 | 0.140073 | Cyp2u1/A    | 10 |
| mmu0041 beta-Alan   | 7/1091  | 32/9773  | 0.059068 | 0.188561 | 0.140073 | Dpyd/Aldl   | 7  |
| mmu0466 Fc epsilon  | 12/1091 | 66/9773  | 0.059456 | 0.188561 | 0.140073 | Fcer1g/Pla  | 12 |
| mmu0491 Insulin sig | 22/1091 | 140/9773 | 0.061188 | 0.19087  | 0.141787 | Pygb/Pck1   | 22 |
| mmu0521 Colorectal  | 15/1091 | 88/9773  | 0.061947 | 0.19087  | 0.141787 | Egf/Tgfb    | 15 |
| mmu0034 Histidine r | 6/1091  | 26/9773  | 0.062394 | 0.19087  | 0.141787 | Aldh1b1/A   | 6  |
| mmu0502 Prion dise  | 39/1091 | 273/9773 | 0.062477 | 0.19087  | 0.141787 | Ndufs1/Nc   | 39 |
| mmu0492 Aldosterol  | 17/1091 | 103/9773 | 0.063421 | 0.191993 | 0.142622 | Npr1/Npp    | 17 |
| mmu0407 Phospholi   | 23/1091 | 149/9773 | 0.06668  | 0.200041 | 0.1486   | Fcer1g/Pla  | 23 |
| mmu0065 Butanoate   | 6/1091  | 27/9773  | 0.072972 | 0.216962 | 0.16117  | Hadha/Ac    | 6  |
| mmu0515 Staphyloc   | 20/1091 | 128/9773 | 0.07513  | 0.221401 | 0.164467 | Fcgr2b/Fc   | 20 |
| mmu0036 Phenylalar  | 5/1091  | 21/9773  | 0.076731 | 0.222185 | 0.16505  | Il4i1/Ddc   | 5  |
| mmu0077 Pantothen   | 5/1091  | 21/9773  | 0.076731 | 0.222185 | 0.16505  | Dpyd/Aldl   | 5  |

|                     |         |          |          |          |          |            |    |
|---------------------|---------|----------|----------|----------|----------|------------|----|
| mmu0523 Central ca  | 12/1091 | 69/9773  | 0.078456 | 0.225224 | 0.167307 | Pik3cd/Flt | 12 |
| mmu0121 Fatty acid  | 11/1091 | 62/9773  | 0.079869 | 0.226407 | 0.168186 | Elovl6/Aca | 11 |
| mmu0421 Ferroptosi  | 8/1091  | 41/9773  | 0.080228 | 0.226407 | 0.168186 | Steap3/Slc | 8  |
| mmu0401 ErbB signa  | 14/1091 | 84/9773  | 0.080965 | 0.226567 | 0.168305 | ErbB4/Pak  | 14 |
| mmu0050 Starch anc  | 7/1091  | 35/9773  | 0.088378 | 0.245249 | 0.182183 | Pygb/Amy   | 7  |
| mmu0514 Amoebias    | 17/1091 | 108/9773 | 0.090293 | 0.248492 | 0.184592 | Rab7b/Lar  | 17 |
| mmu0472 Glutamate   | 18/1091 | 116/9773 | 0.092525 | 0.252548 | 0.187605 | Grin1/Pla2 | 18 |
| mmu0493 AGE-RAG     | 16/1091 | 101/9773 | 0.09393  | 0.254297 | 0.188904 | Stat1/Tgfb | 16 |
| mmu0006 Fatty acid  | 6/1091  | 29/9773  | 0.096991 | 0.260394 | 0.193433 | Elovl6/Ppt | 6  |
| mmu0514 Malaria -   | 10/1091 | 57/9773  | 0.097745 | 0.260394 | 0.193433 | Ackr1/Mei  | 10 |
| mmu0497 Fat digesti | 8/1091  | 43/9773  | 0.100208 | 0.264837 | 0.196733 | Abca1/Plp  | 8  |
| mmu0435 TGF-beta    | 17/1091 | 110/9773 | 0.102816 | 0.269588 | 0.200263 | Fmod/Rbl   | 17 |
| mmu0048 Glutathior  | 12/1091 | 73/9773  | 0.109175 | 0.284025 | 0.210987 | Chac1/Gst  | 12 |
| mmu0496 Vasopress   | 8/1091  | 44/9773  | 0.111154 | 0.284987 | 0.211702 | Aqp3/Dyn   | 8  |
| mmu0467 Leukocyte   | 18/1091 | 119/9773 | 0.111256 | 0.284987 | 0.211702 | Cxcr4/Ncf  | 18 |
| mmu0453 Tight junc  | 24/1091 | 169/9773 | 0.128213 | 0.325915 | 0.242106 | Arpc2/Act  | 24 |
| mmu0521 Pancreatic  | 12/1091 | 76/9773  | 0.136238 | 0.343691 | 0.25531  | Stat1/Radl | 12 |
| mmu0059 alpha-Linc  | 5/1091  | 25/9773  | 0.139079 | 0.3471   | 0.257842 | Pla2g4e/P  | 5  |
| mmu0421 Apoptosis   | 6/1091  | 32/9773  | 0.139828 | 0.3471   | 0.257842 | Casp8/Ma   | 6  |
| mmu0437 Apelin sig  | 20/1091 | 139/9773 | 0.140716 | 0.3471   | 0.257842 | Prkab2/Tg  | 20 |
| mmu0520 Proteogly   | 28/1091 | 204/9773 | 0.144588 | 0.354028 | 0.262989 | Fzd5/ErbB  | 28 |
| mmu0520 Chemical    | 31/1091 | 229/9773 | 0.147607 | 0.358782 | 0.266521 | Ndufs1/Nu  | 31 |
| mmu0006 Fatty acid  | 4/1091  | 19/9773  | 0.154702 | 0.373303 | 0.277308 | Olah/Acac  | 4  |
| mmu0421 Cellular se | 25/1091 | 182/9773 | 0.159765 | 0.378862 | 0.281437 | Rbl1/Ccna  | 25 |
| mmu0056 Glycerolip  | 10/1091 | 63/9773  | 0.159914 | 0.378862 | 0.281437 | Gpat2/Ald  | 10 |
| mmu0461 Compleme    | 14/1091 | 94/9773  | 0.160419 | 0.378862 | 0.281437 | Hc/Cd59a   | 14 |
| mmu0414 Lysosome    | 19/1091 | 135/9773 | 0.171327 | 0.401774 | 0.298457 | Ctsz/Gba   | 19 |
| mmu0497 Carbohydr   | 8/1091  | 49/9773  | 0.174838 | 0.404932 | 0.300803 | Lct/Amy1   | 8  |
| mmu0492 Cortisol sy | 11/1091 | 72/9773  | 0.175106 | 0.404932 | 0.300803 | Kcnk3/Sca  | 11 |
| mmu0421 Necroptos   | 24/1091 | 177/9773 | 0.182068 | 0.418129 | 0.310606 | Stat1/Casp | 24 |
| mmu0451 Focal adhe  | 27/1091 | 202/9773 | 0.184547 | 0.420919 | 0.312679 | Lamc2/Pal  | 27 |
| mmu0059 Arachidon   | 13/1091 | 89/9773  | 0.189639 | 0.42959  | 0.31912  | Ptgs2/Ptgc | 13 |
| mmu0492 Relaxin sig | 18/1091 | 130/9773 | 0.197955 | 0.445126 | 0.330661 | Rxfp1/Tgfl | 18 |
| mmu0516 Human cy    | 33/1091 | 254/9773 | 0.199171 | 0.445126 | 0.330661 | Casp8/Cxc  | 33 |
| mmu0497 Pancreatic  | 16/1091 | 115/9773 | 0.209672 | 0.465472 | 0.345775 | Sctr/Cpa3  | 16 |
| mmu0201 ABC transp  | 8/1091  | 52/9773  | 0.219348 | 0.478255 | 0.355271 | Abca1/Ab   | 8  |
| mmu0415 PI3K-Akt s  | 46/1091 | 367/9773 | 0.219488 | 0.478255 | 0.355271 | ErbB4/Lan  | 46 |
| mmu0492 Parathyroi  | 16/1091 | 116/9773 | 0.219778 | 0.478255 | 0.355271 | Rxrg/Gata  | 16 |
| mmu0497 Protein di  | 15/1091 | 108/9773 | 0.221175 | 0.478255 | 0.355271 | Cpa3/Eln   | 15 |
| mmu0019 Oxidative   | 19/1091 | 141/9773 | 0.223983 | 0.481202 | 0.35746  | Ndufs1/Nu  | 19 |
| mmu0461 Platelet ac | 17/1091 | 125/9773 | 0.228145 | 0.487001 | 0.361768 | Fcgr3/Fcer | 17 |
| mmu0491 Progester   | 13/1091 | 93/9773  | 0.235005 | 0.490442 | 0.364324 | Bub1/Cdc   | 13 |
| mmu0491 Estrogen s  | 18/1091 | 134/9773 | 0.235853 | 0.490442 | 0.364324 | Jun/Pik3cc | 18 |
| mmu0516 Herpes sir  | 57/1091 | 464/9773 | 0.236078 | 0.490442 | 0.364324 | Stat1/Casp | 57 |
| mmu0472 Synaptic v  | 11/1091 | 77/9773  | 0.2369   | 0.490442 | 0.364324 | Snap25/Ai  | 11 |
| mmu0503 Amphetar    | 10/1091 | 69/9773  | 0.237121 | 0.490442 | 0.364324 | Grin1/Grir | 10 |
| mmu0522 Acute mye   | 10/1091 | 70/9773  | 0.251172 | 0.516298 | 0.383531 | Spi1/Ccna  | 10 |
| mmu0064 Propanoat   | 5/1091  | 31/9773  | 0.260524 | 0.532235 | 0.39537  | Hadha/Ac   | 5  |
| mmu0027 Cysteine a  | 8/1091  | 55/9773  | 0.267541 | 0.543238 | 0.403543 | Phgdh/Sd   | 8  |
| mmu0401 Rap1 sign   | 27/1091 | 214/9773 | 0.277236 | 0.559514 | 0.415634 | Grin1/Ang  | 27 |
| mmu0024 Pyrimidine  | 8/1091  | 56/9773  | 0.284251 | 0.561887 | 0.417397 | Dpyd/Enp   | 8  |
| mmu0516 Hepatitis E | 21/1091 | 164/9773 | 0.284374 | 0.561887 | 0.417397 | Stat1/Casp | 21 |
| mmu0026 Glycine, se | 6/1091  | 40/9773  | 0.285162 | 0.561887 | 0.417397 | Gatm/Phg   | 6  |
| mmu0035 Tyrosine n  | 6/1091  | 40/9773  | 0.285162 | 0.561887 | 0.417397 | Il4i1/Ddc  | 6  |
| mmu0060 Glycosphii  | 3/1091  | 17/9773  | 0.293611 | 0.575132 | 0.427236 | B3galnt1/I | 3  |
| mmu0028 Valine, leu | 8/1091  | 57/9773  | 0.301221 | 0.586587 | 0.435745 | Ivd/Acadn  | 8  |
| mmu0491 Prolactin s | 10/1091 | 74/9773  | 0.309891 | 0.596503 | 0.443111 | Stat1/Tnfr | 10 |
| mmu0406 HIF-1 sig   | 15/1091 | 116/9773 | 0.312356 | 0.596503 | 0.443111 | Angpt4/Eg  | 15 |

|                                  |         |          |          |          |          |             |    |
|----------------------------------|---------|----------|----------|----------|----------|-------------|----|
| mmu0406 FoxO sign                | 17/1091 | 133/9773 | 0.313645 | 0.596503 | 0.443111 | Pck1/Prka   | 17 |
| mmu0516 Hepatitis C              | 21/1091 | 167/9773 | 0.314012 | 0.596503 | 0.443111 | Stat1/Casp  | 21 |
| mmu0414 Endocytosis              | 33/1091 | 270/9773 | 0.315269 | 0.596503 | 0.443111 | Arpc2/Act   | 33 |
| mmu0497 Cholesterol              | 7/1091  | 50/9773  | 0.322386 | 0.599591 | 0.445405 | Lrp2/Abca   | 7  |
| mmu0497 Gastric acid             | 10/1091 | 75/9773  | 0.325071 | 0.599591 | 0.445405 | Slc9a4/My   | 10 |
| mmu0012 Primary bile             | 3/1091  | 18/9773  | 0.325685 | 0.599591 | 0.445405 | Acnat1/Cy   | 3  |
| mmu0051 Other glycolysis         | 3/1091  | 18/9773  | 0.325685 | 0.599591 | 0.445405 | Neu2/Gba    | 3  |
| mmu0344 Homologous recombination | 6/1091  | 42/9773  | 0.325904 | 0.599591 | 0.445405 | Bard1/Rac   | 6  |
| mmu0471 Circadian rhythm         | 5/1091  | 34/9773  | 0.328518 | 0.601079 | 0.44651  | Npas2/Prk   | 5  |
| mmu0497 Bile secretion           | 13/1091 | 101/9773 | 0.336152 | 0.611687 | 0.454391 | Sctr/Acnat  | 13 |
| mmu0472 Retrograde transport     | 19/1091 | 153/9773 | 0.346315 | 0.626752 | 0.465582 | Ndufs1/Nd   | 19 |
| mmu0473 Long-term potentiation   | 8/1091  | 60/9773  | 0.353288 | 0.626752 | 0.465582 | Pla2g4e/P   | 8  |
| mmu0060 Glycosphingolipid        | 4/1091  | 27/9773  | 0.355832 | 0.626752 | 0.465582 | Fut7/B3ga   | 4  |
| mmu0439 Hippo signaling          | 4/1091  | 27/9773  | 0.355832 | 0.626752 | 0.465582 | Pak1/Dchs   | 4  |
| mmu0510 Bacterial infection      | 10/1091 | 77/9773  | 0.355845 | 0.626752 | 0.465582 | Arpc2/Act   | 10 |
| mmu0522 Small cell carcinoma     | 12/1091 | 94/9773  | 0.356361 | 0.626752 | 0.465582 | Ptgs2/Larr  | 12 |
| mmu0501 Alzheimer's disease      | 46/1091 | 389/9773 | 0.360165 | 0.626752 | 0.465582 | Casp8/Nd    | 46 |
| mmu0038 Tryptophan               | 7/1091  | 52/9773  | 0.360168 | 0.626752 | 0.465582 | Kynu/Aldh   | 7  |
| mmu0491 Thyroid hormone          | 15/1091 | 120/9773 | 0.361371 | 0.626752 | 0.465582 | Stat1/Rxrg  | 15 |
| mmu0454 Gap junctions            | 11/1091 | 86/9773  | 0.363647 | 0.627433 | 0.466087 | Gucy1b1/I   | 11 |
| mmu0303 DNA replication          | 5/1091  | 36/9773  | 0.374803 | 0.643347 | 0.477909 | Mcm3/Mc     | 5  |
| mmu0521 Renal cell carcinoma     | 9/1091  | 70/9773  | 0.379661 | 0.648344 | 0.481621 | Pak6/Jun/   | 9  |
| mmu0411 Oocyte maturation        | 15/1091 | 123/9773 | 0.398944 | 0.677798 | 0.503501 | Bub1/Aurl   | 15 |
| mmu0493 Alcoholism               | 17/1091 | 141/9773 | 0.406329 | 0.686841 | 0.510219 | Il17a/Casp  | 17 |
| mmu0471 Thermogenesis            | 28/1091 | 238/9773 | 0.413458 | 0.69536  | 0.516547 | Ndufs1/Nd   | 28 |
| mmu0060 Sphingolipid             | 7/1091  | 55/9773  | 0.41735  | 0.696501 | 0.517395 | Neu2/Gba    | 7  |
| mmu0152 Platinum chemotherapy    | 10/1091 | 81/9773  | 0.418319 | 0.696501 | 0.517395 | Casp8/Gst   | 10 |
| mmu0053 Glycosaminoglycan        | 3/1091  | 21/9773  | 0.421004 | 0.697485 | 0.518125 | Xylt1/Csga  | 3  |
| mmu0407 Sphingolipid             | 15/1091 | 126/9773 | 0.436815 | 0.720096 | 0.534922 | Fcer1g/Plc  | 15 |
| mmu0491 Thyroid hormone          | 9/1091  | 74/9773  | 0.44596  | 0.73155  | 0.543431 | Lrp2/Pdia   | 9  |
| mmu0472 Dopamine                 | 16/1091 | 136/9773 | 0.451642 | 0.734002 | 0.545252 | Ppp2r2c/M   | 16 |
| mmu0043 Taurine                  | 3/1091  | 22/9773  | 0.451863 | 0.734002 | 0.545252 | Fmo6/Acn    | 3  |
| mmu0123 Nucleotide               | 10/1091 | 84/9773  | 0.465188 | 0.751979 | 0.558606 | Entpd2/Al   | 10 |
| mmu0434 Hedgehog                 | 7/1091  | 58/9773  | 0.474071 | 0.75897  | 0.563799 | Ilhh/Gpr16  | 7  |
| mmu0437 VEGF signaling           | 7/1091  | 58/9773  | 0.474071 | 0.75897  | 0.563799 | Ptgs2/Pla2  | 7  |
| mmu0541 Fluid shear stress       | 17/1091 | 148/9773 | 0.489013 | 0.779108 | 0.578759 | Gpc1/Ncf2   | 17 |
| mmu0431 Wnt signaling            | 20/1091 | 175/9773 | 0.491329 | 0.779108 | 0.578759 | Fzd5/Lgr6   | 20 |
| mmu0053 Glycosaminoglycan        | 3/1091  | 24/9773  | 0.511363 | 0.803404 | 0.596807 | Extl2/Xylt1 | 3  |
| mmu0073 Thiamine                 | 12/1091 | 15/9773  | 0.511477 | 0.803404 | 0.596807 | Ak1/Ak5     | 2  |
| mmu0496 Endocrine                | 7/1091  | 61/9773  | 0.529273 | 0.827454 | 0.614673 | Kl/Klk1b11  | 7  |
| mmu0451 ECM-receptor             | 10/1091 | 89/9773  | 0.541493 | 0.841058 | 0.624778 | Lamc2/Cd    | 10 |
| mmu0152 EGFR tyrosine            | 9/1091  | 80/9773  | 0.543025 | 0.841058 | 0.624778 | Egf/Pik3cc  | 9  |
| mmu0493 Cushing's syndrome       | 18/1091 | 162/9773 | 0.54611  | 0.84192  | 0.625418 | Fzd5/Cdkr   | 18 |
| mmu0056 Inositol                 | 8/1091  | 72/9773  | 0.561389 | 0.843377 | 0.626501 | Pip4k2a/P   | 8  |
| mmu0522 Non-small cell carcinoma | 8/1091  | 72/9773  | 0.561389 | 0.843377 | 0.626501 | Rxrg/Egf/C  | 8  |
| mmu0325 Viral life cycle         | 7/1091  | 63/9773  | 0.564792 | 0.843377 | 0.626501 | Cxcr4/Ma    | 7  |
| mmu0433 Notch signaling          | 7/1091  | 63/9773  | 0.564792 | 0.843377 | 0.626501 | Dll4/Rbpjl  | 7  |
| mmu0497 Vitamin D                | 3/1091  | 26/9773  | 0.567262 | 0.843377 | 0.626501 | Scarb1/Fo   | 3  |
| mmu0520 Viral carcinoma          | 25/1091 | 228/9773 | 0.570313 | 0.843377 | 0.626501 | Casp8/Tra   | 25 |
| mmu0520 Chemical carcinogen      | 25/1091 | 228/9773 | 0.570313 | 0.843377 | 0.626501 | Rxrg/Dll4/  | 25 |
| mmu0462 Cytosolic                | 19/1091 | 82/9773  | 0.573979 | 0.843377 | 0.626501 | Casp8/Zbp   | 9  |
| mmu0501 Parkinson's disease      | 30/1091 | 274/9773 | 0.57482  | 0.843377 | 0.626501 | Ndufs1/Nd   | 30 |
| mmu0091 Nitrogen                 | 12/1091 | 17/9773  | 0.580956 | 0.843377 | 0.626501 | Car3/Car8   | 2  |
| mmu0491 Ovarian stroma           | 7/1091  | 64/9773  | 0.582085 | 0.843377 | 0.626501 | Ptgs2/Pla2  | 7  |
| mmu0004 Pentose                  | 4/1091  | 36/9773  | 0.582331 | 0.843377 | 0.626501 | Rpe/Eggy/   | 4  |
| mmu0005 Fructose                 | 4/1091  | 36/9773  | 0.582331 | 0.843377 | 0.626501 | Pfkfb4/Hk   | 4  |
| mmu0522 Breast cancer            | 16/1091 | 147/9773 | 0.582513 | 0.843377 | 0.626501 | Fzd5/Dll4/  | 16 |
| mmu0059 Linoleic acid            | 6/1091  | 55/9773  | 0.587653 | 0.845932 | 0.628399 | Pla2g4e/P   | 6  |

|                              |          |          |          |          |            |    |
|------------------------------|----------|----------|----------|----------|------------|----|
| mmu0521 Glioma - I8/1091     | 74/9773  | 0.593593 | 0.845932 | 0.628399 | Egf/Cdkn2  | 8  |
| mmu0496 Collecting 3/1091    | 27/9773  | 0.593691 | 0.845932 | 0.628399 | Atp6v0e2/  | 3  |
| mmu0516 Human pε 39/1091     | 359/9773 | 0.598705 | 0.845932 | 0.628399 | Stat1/Cas  | 39 |
| mmu0475 Inflammation 14/1091 | 130/9773 | 0.598922 | 0.845932 | 0.628399 | Prkcg/Pla2 | 14 |
| mmu0152 Endocrine 10/1091    | 93/9773  | 0.599519 | 0.845932 | 0.628399 | Dll4/Cdkn  | 10 |
| mmu0521 Thyroid cε 4/1091    | 37/9773  | 0.604678 | 0.849611 | 0.631132 | Rxrg/Tpm   | 4  |
| mmu0502 Pathways 52/1091     | 481/9773 | 0.621876 | 0.870104 | 0.646355 | Casp8/Nd   | 52 |
| mmu0496 Aldosterone 4/1091   | 38/9773  | 0.626281 | 0.872601 | 0.64821  | Sfn/Pik3cc | 4  |
| mmu0503 Cocaine a 5/1091     | 48/9773  | 0.633609 | 0.879133 | 0.653062 | Grin1/Grir | 5  |
| mmu0493 Growth hc 12/1091    | 117/9773 | 0.666645 | 0.91484  | 0.679588 | Stat1/Pik3 | 12 |
| mmu0503 Nicotine a 4/1091    | 40/9773  | 0.667169 | 0.91484  | 0.679588 | Grin1/Grir | 4  |
| mmu0472 Serotonergic 14/1091 | 136/9773 | 0.667586 | 0.91484  | 0.679588 | Ptgs2/Ptg  | 14 |
| mmu0517 Coronavirus 35/1091  | 334/9773 | 0.682996 | 0.932122 | 0.692425 | Stat1/Fcgr | 35 |
| mmu0005 Ascorbate 3/1091     | 31/9773  | 0.688482 | 0.932857 | 0.692971 | Aldh1b1/L  | 3  |
| mmu0326 Virion - H 1/1091    | 10/9773  | 0.694038 | 0.932857 | 0.692971 | Pilra      | 1  |
| mmu0439 Hippo sign 16/1091   | 158/9773 | 0.698986 | 0.932857 | 0.692971 | Fzd5/Tgfb  | 16 |
| mmu0052 Amino su 5/1091      | 52/9773  | 0.703922 | 0.932857 | 0.692971 | Chia1/Cyc  | 5  |
| mmu0346 Fanconi a 5/1091     | 52/9773  | 0.703922 | 0.932857 | 0.692971 | Rad51/Far  | 5  |
| mmu0005 Galactose 3/1091     | 32/9773  | 0.709401 | 0.932857 | 0.692971 | Lct/Hk3/P  | 3  |
| mmu0051 Mucin typ 3/1091     | 32/9773  | 0.709401 | 0.932857 | 0.692971 | Galnt17/C  | 3  |
| mmu0455 Signaling 14/1091    | 140/9773 | 0.709526 | 0.932857 | 0.692971 | Fzd5/Pik3c | 14 |
| mmu0472 Neurotro 12/1091     | 121/9773 | 0.711635 | 0.932857 | 0.692971 | Ngf/Jun/P  | 12 |
| mmu0452 Adherens 9/1091      | 92/9773  | 0.712288 | 0.932857 | 0.692971 | Myl9/Tgfb  | 9  |
| mmu0501 Spinocere 14/1091    | 141/9773 | 0.719488 | 0.932857 | 0.692971 | Grin1/Rbp  | 14 |
| mmu0462 RIG-I-like 7/1091    | 73/9773  | 0.720451 | 0.932857 | 0.692971 | Casp8/Ifih | 7  |
| mmu0076 Nicotinate 4/1091    | 43/9773  | 0.722538 | 0.932857 | 0.692971 | Bst1/Art2a | 4  |
| mmu0013 Ubiquitin 1/1091     | 11/9773  | 0.728229 | 0.932857 | 0.692971 | Coq7       | 1  |
| mmu0413 SNARE int 3/1091     | 33/9773  | 0.729223 | 0.932857 | 0.692971 | Stx1b/Stx1 | 3  |
| mmu0472 Cholinergic 11/1091  | 113/9773 | 0.729713 | 0.932857 | 0.692971 | Pik3cd/Ch  | 11 |
| mmu0031 Lysine dec 6/1091    | 64/9773  | 0.733774 | 0.932857 | 0.692971 | Aldh1b1/F  | 6  |
| mmu0436 Axon guid 18/1091    | 181/9773 | 0.734634 | 0.932857 | 0.692971 | Epha4/Cxc  | 18 |
| mmu0051 Mannose 2/1091       | 23/9773  | 0.744734 | 0.932857 | 0.692971 | Chst10/Fu  | 2  |
| mmu0090 Terpenoid 2/1091     | 23/9773  | 0.744734 | 0.932857 | 0.692971 | Pcyox1/Ld  | 2  |
| mmu0023 Purine me 13/1091    | 134/9773 | 0.745373 | 0.932857 | 0.692971 | Entpd2/Al  | 13 |
| mmu0003 Pentose p 3/1091     | 34/9773  | 0.747966 | 0.932857 | 0.692971 | Rpe/Fbp2   | 3  |
| mmu0104 Biosynthes 3/1091    | 34/9773  | 0.747966 | 0.932857 | 0.692971 | Elovl6/Acr | 3  |
| mmu0472 Long-term 6/1091     | 67/9773  | 0.773332 | 0.960894 | 0.713798 | Grin1/Grr  | 6  |
| mmu0520 Transcript 22/1091   | 226/9773 | 0.784492 | 0.968536 | 0.719475 | Eya1/Rxrg  | 22 |
| mmu0305 Proteasom 4/1091     | 47/9773  | 0.785299 | 0.968536 | 0.719475 | Psme1/Psi  | 4  |
| mmu0521 Endometri 5/1091     | 58/9773  | 0.790717 | 0.971619 | 0.721765 | Egf/Pik3cc | 5  |
| mmu0472 GABAergic 8/1091     | 90/9773  | 0.80114  | 0.980807 | 0.728591 | Slc6a13/A  | 8  |
| mmu0053 Glycosami 1/1091     | 14/9773  | 0.809551 | 0.987475 | 0.733544 | B3gnt7     | 1  |
| mmu0421 Longevity 5/1091     | 61/9773  | 0.825982 | 1        | 0.742848 | Prkab2/Pil | 5  |
| mmu0060 Glycosphii 1/1091    | 15/9773  | 0.830842 | 1        | 0.742848 | St8sia5    | 1  |
| mmu0521 Basal cell 5/1091    | 63/9773  | 0.846702 | 1        | 0.742848 | Fzd5/Ptch  | 5  |
| mmu0414 Autophag 15/1091     | 167/9773 | 0.848527 | 1        | 0.742848 | Rab7b/Prk  | 15 |
| mmu0152 Antifolate 2/1091    | 29/9773  | 0.850409 | 1        | 0.742848 | Folr2/Tnf  | 2  |
| mmu0521 Bladder cε 3/1091    | 41/9773  | 0.851515 | 1        | 0.742848 | Egf/Cdkn2  | 3  |
| mmu0407 Phosphati 8/1091     | 96/9773  | 0.854288 | 1        | 0.742848 | Pip4k2a/P  | 8  |
| mmu0522 Chronic m 6/1091     | 76/9773  | 0.865488 | 1        | 0.742848 | Tgfbr1/Cd  | 6  |
| mmu0045 Selenocon 1/1091     | 17/9773  | 0.866555 | 1        | 0.742848 | Mtr        | 1  |
| mmu0498 Cobalamir 1/1091     | 17/9773  | 0.866555 | 1        | 0.742848 | Mtr        | 1  |
| mmu0522 Gastric car 13/1091  | 150/9773 | 0.868541 | 1        | 0.742848 | Fzd5/Rxrg  | 13 |
| mmu0051 Other type 3/1091    | 43/9773  | 0.873314 | 1        | 0.742848 | Galnt17/C  | 3  |
| mmu0124 Biosynthes 13/1091   | 152/9773 | 0.879923 | 1        | 0.742848 | Ak1/Kynu   | 13 |
| mmu0491 Melanoge 8/1091      | 100/9773 | 0.882922 | 1        | 0.742848 | Fzd5/Wnt   | 8  |
| mmu0063 Glyoxylate 2/1091    | 32/9773  | 0.886704 | 1        | 0.742848 | Cs/Mdh1    | 2  |
| mmu0421 Longevity 7/1091     | 90/9773  | 0.888333 | 1        | 0.742848 | Prkab2/Pil | 7  |

|                    |         |          |          |   |                     |    |
|--------------------|---------|----------|----------|---|---------------------|----|
| mmu0413 Mitophagy  | 8/1091  | 101/9773 | 0.889304 | 1 | 0.742848 Rab7b/Jur  | 8  |
| mmu0522 Hepatocel  | 15/1091 | 175/9773 | 0.892189 | 1 | 0.742848 Fzd5/Gstr  | 15 |
| mmu0067 One carb   | 1/1091  | 19/9773  | 0.894734 | 1 | 0.742848 Mtr        | 1  |
| mmu0461 Neutrophil | 18/1091 | 209/9773 | 0.906141 | 1 | 0.742848 Ncf2/Fcgr  | 18 |
| mmu0086 Porphyrin  | 3/1091  | 47/9773  | 0.908572 | 1 | 0.742848 Blvra/Ugt2 | 3  |
| mmu0301 RNA degrad | 6/1091  | 83/9773  | 0.913536 | 1 | 0.742848 Btg2/Eno1  | 6  |
| mmu0098 Drug metab | 5/1091  | 72/9773  | 0.916199 | 1 | 0.742848 Fmo6/Gstr  | 5  |
| mmu0521 Melanoma   | 5/1091  | 72/9773  | 0.916199 | 1 | 0.742848 Egf/Cdkn2  | 5  |
| mmu0053 Glycosami  | 1/1091  | 21/9773  | 0.916966 | 1 | 0.742848 Arsb       | 1  |
| mmu0098 Drug metab | 7/1091  | 95/9773  | 0.917528 | 1 | 0.742848 Gstm5/Gst  | 7  |
| mmu0532 Systemic I | 12/1091 | 150/9773 | 0.920211 | 1 | 0.742848 Cd28/Fcgr  | 12 |
| mmu0501 Amyotroph  | 34/1091 | 375/9773 | 0.922239 | 1 | 0.742848 Ndufs1/Er  | 34 |
| mmu0501 Huntingto  | 27/1091 | 308/9773 | 0.930292 | 1 | 0.742848 Casp8/Nd   | 27 |
| mmu0414 Peroxisom  | 6/1091  | 87/9773  | 0.933665 | 1 | 0.742848 Phyh/Acna  | 6  |
| mmu0343 Mismatch   | 1/1091  | 23/9773  | 0.934507 | 1 | 0.742848 Lig1       | 1  |
| mmu0125 Biosynthes | 2/1091  | 38/9773  | 0.936077 | 1 | 0.742848 Gfpt2/Hk3  | 2  |
| mmu0098 Metabolism | 5/1091  | 76/9773  | 0.936927 | 1 | 0.742848 Gstm5/Gst  | 5  |
| mmu0521 Prostate c | 7/1091  | 100/9773 | 0.939877 | 1 | 0.742848 Egf/Pik3cc | 7  |
| mmu0503 Morphine   | 6/1091  | 92/9773  | 0.95292  | 1 | 0.742848 Pde1c/Ad   | 6  |
| mmu0301 mRNA sur   | 7/1091  | 104/9773 | 0.953714 | 1 | 0.742848 Ppp2r2c/M  | 7  |
| mmu0306 Protein ex | 2/1091  | 42/9773  | 0.956791 | 1 | 0.742848 Arxes2/Ar  | 2  |
| mmu0474 Phototran  | 1/1091  | 27/9773  | 0.95926  | 1 | 0.742848 Calml3     | 1  |
| mmu0495 Maturity c | 1/1091  | 27/9773  | 0.95926  | 1 | 0.742848 Nkx2-2     | 1  |
| mmu0341 Base excis | 2/1091  | 47/9773  | 0.97376  | 1 | 0.742848 Lig1/Pnkp  | 2  |
| mmu0520 MicroRNA   | 24/1091 | 303/9773 | 0.976415 | 1 | 0.742848 Ptgs2/Vim  | 24 |
| mmu0302 RNA polyr  | 1/1091  | 32/9773  | 0.977501 | 1 | 0.742848 Polr1b     | 1  |
| mmu0520 Chemical   | 5/1091  | 90/9773  | 0.978101 | 1 | 0.742848 Ptgs2/Gstr | 5  |
| mmu0415 mTOR sign  | 10/1091 | 158/9773 | 0.986485 | 1 | 0.742848 Fzd5/Rnf1  | 10 |
| mmu0414 Protein pr | 11/1091 | 175/9773 | 0.990333 | 1 | 0.742848 Bag2/Pdia  | 11 |
| mmu0308 Polycomb   | 4/1091  | 87/9773  | 0.990747 | 1 | 0.742848 Phf19/Ezh  | 4  |
| mmu0412 Ubiquitin  | 9/1091  | 154/9773 | 0.992192 | 1 | 0.742848 Ube2c/Klh  | 9  |
| mmu0051 Various ty | 1/1091  | 43/9773  | 0.993913 | 1 | 0.742848 Mgat4c     | 1  |
| mmu0474 Taste tran | 4/1091  | 92/9773  | 0.994058 | 1 | 0.742848 Entpd2/Pc  | 4  |
| mmu0051 N-Glycan   | 1/1091  | 53/9773  | 0.998148 | 1 | 0.742848 Mgat4c     | 1  |
| mmu0342 Nucleotide | 1/1091  | 58/9773  | 0.998979 | 1 | 0.742848 Lig1       | 1  |
| mmu0014 Steroid hc | 3/1091  | 99/9773  | 0.999298 | 1 | 0.742848 Ugt2b34/f  | 3  |
| mmu0301 Nucleocyt  | 4/1091  | 118/9773 | 0.999468 | 1 | 0.742848 Eef1a2/Ma  | 4  |
| mmu0083 Retinol m  | 3/1091  | 102/9773 | 0.999481 | 1 | 0.742848 Ugt2b34/c  | 3  |
| mmu0097 Aminoacy   | 1/1091  | 66/9773  | 0.999606 | 1 | 0.742848 Qrs1       | 1  |
| mmu0503 Alcoholism | 9/1091  | 207/9773 | 0.999869 | 1 | 0.742848 Grin1/Pkia | 9  |
| mmu0300 Ribosome   | 2/1091  | 125/9773 | 0.999994 | 1 | 0.742848 Rexo5/Xpo  | 2  |
| mmu0308 ATP-depe   | 2/1091  | 136/9773 | 0.999998 | 1 | 0.742848 Smarcd3/f  | 2  |
| mmu0301 Ribosome   | 7/1091  | 265/9773 | 1        | 1 | 0.742848 Rps3a1/Rp  | 7  |
| mmu0304 Spliceosom | 6/1091  | 260/9773 | 1        | 1 | 0.742848 Magohb/S   | 6  |

**Supplementary Table 5** KEGG pathways enriched from DEGs between the Pten<sup>d/d</sup>ELF3<sup>OV</sup> vs Pten<sup>d/d</sup> groups

| ID      | Descriptio   | GeneRatic | BgRatio  | pvalue   | p.adjust | qvalue   | geneID      | Count |
|---------|--------------|-----------|----------|----------|----------|----------|-------------|-------|
| mmu0414 | Lysosome     | 67/1844   | 135/9773 | 4.31E-16 | 1.46E-13 | 8.53E-14 | Slc11a1/A   | 67    |
| mmu0513 | Salmonell    | 97/1844   | 252/9773 | 1.41E-13 | 2.40E-11 | 1.40E-11 | Ly96/Casp   | 97    |
| mmu0414 | Phagosome    | 74/1844   | 183/9773 | 7.20E-12 | 8.16E-10 | 4.75E-10 | Pikfyve/Tu  | 74    |
| mmu0438 | Osteoclast   | 60/1844   | 136/9773 | 9.65E-12 | 8.20E-10 | 4.78E-10 | Il1r1/Fhl2/ | 60    |
| mmu0513 | Yersinia in  | 55/1844   | 136/9773 | 3.59E-09 | 2.44E-07 | 1.42E-07 | Zap70/Fn1   | 55    |
| mmu0515 | Tuberculo    | 67/1844   | 180/9773 | 4.49E-09 | 2.55E-07 | 1.48E-07 | Casp8/Fcg   | 67    |
| mmu0532 | Rheumato     | 39/1844   | 87/9773  | 2.40E-08 | 1.17E-06 | 6.80E-07 | Il17a/Tnfrs | 39    |
| mmu0514 | Leishmani    | 33/1844   | 70/9773  | 6.43E-08 | 2.73E-06 | 1.59E-06 | Ncf2/Fcgr   | 33    |
| mmu0481 | Motor pro    | 68/1844   | 198/9773 | 1.39E-07 | 5.24E-06 | 3.05E-06 | Dnah7b/C    | 68    |
| mmu0514 | Toxoplasn    | 43/1844   | 109/9773 | 4.12E-07 | 1.40E-05 | 8.15E-06 | Ly96/Casp   | 43    |
| mmu0414 | Efferocyto   | 57/1844   | 161/9773 | 4.54E-07 | 1.40E-05 | 8.17E-06 | Rab7b/Ilg   | 57    |
| mmu0514 | Chagas di    | 41/1844   | 103/9773 | 5.75E-07 | 1.63E-05 | 9.48E-06 | Casp8/Tgf   | 41    |
| mmu0466 | Fc gamma     | 38/1844   | 94/9773  | 9.36E-07 | 2.33E-05 | 1.35E-05 | Arpc2/Inp   | 38    |
| mmu0033 | Arginine a   | 26/1844   | 54/9773  | 9.59E-07 | 2.33E-05 | 1.35E-05 | Pycr2/Ckn   | 26    |
| mmu0421 | Apoptosis    | 48/1844   | 135/9773 | 3.15E-06 | 7.13E-05 | 4.15E-05 | Casp8/Tuk   | 48    |
| mmu0481 | Regulator    | 72/1844   | 232/9773 | 4.61E-06 | 9.79E-05 | 5.70E-05 | Pikfyve/Fn  | 72    |
| mmu0462 | C-type lec   | 41/1844   | 112/9773 | 7.12E-06 | 0.000142 | 8.29E-05 | Casp8/Fce   | 41    |
| mmu0466 | B cell rece  | 33/1844   | 84/9773  | 9.94E-06 | 0.000187 | 0.000109 | Inpp5d/Fc   | 33    |
| mmu0461 | Platelet ac  | 44/1844   | 125/9773 | 1.08E-05 | 0.000187 | 0.000109 | Fcgr3/Fce   | 44    |
| mmu0513 | Legionell    | 26/1844   | 60/9773  | 1.10E-05 | 0.000187 | 0.000109 | Casp8/Tlr2  | 26    |
| mmu0461 | Compleme     | 35/1844   | 94/9773  | 2.15E-05 | 0.000348 | 0.000202 | Serpine2/C  | 35    |
| mmu0406 | NF-kappa     | 38/1844   | 107/9773 | 3.35E-05 | 0.000512 | 0.000298 | Ly96/Zap7   | 38    |
| mmu0482 | Cytoskelet   | 69/1844   | 232/9773 | 3.46E-05 | 0.000512 | 0.000298 | Fhl2/Col5a  | 69    |
| mmu0010 | Steroid bi   | 12/1844   | 20/9773  | 5.48E-05 | 0.000776 | 0.000452 | Soat1/Hsc   | 12    |
| mmu0516 | Kaposi sar   | 66/1844   | 223/9773 | 6.00E-05 | 0.000816 | 0.000475 | Casp8/Hcl   | 66    |
| mmu0510 | Bacterial ir | 29/1844   | 77/9773  | 8.39E-05 | 0.001089 | 0.000634 | Fn1/Arpc2   | 29    |
| mmu0541 | Lipid and    | 64/1844   | 217/9773 | 8.65E-05 | 0.001089 | 0.000634 | Ly96/Casp   | 64    |
| mmu0051 | Other gly    | 11/1844   | 18/9773  | 8.99E-05 | 0.001092 | 0.000635 | Neu2/Gba    | 11    |
| mmu0453 | Tight junc   | 52/1844   | 169/9773 | 0.00012  | 0.001408 | 0.00082  | Mpp4/Arp    | 52    |
| mmu0493 | Alcoholic    | 45/1844   | 141/9773 | 0.000133 | 0.001502 | 0.000874 | Ly96/Il17a  | 45    |
| mmu0464 | Hematopo     | 33/1844   | 94/9773  | 0.000139 | 0.001528 | 0.00089  | Il1r1/Cd55  | 33    |
| mmu0121 | Fatty acid   | 24/1844   | 62/9773  | 0.000206 | 0.00219  | 0.001275 | Acsl3/Hac   | 24    |
| mmu0541 | Fluid shea   | 46/1844   | 148/9773 | 0.000224 | 0.002221 | 0.001293 | Gsta3/Il1r  | 46    |
| mmu0402 | Calcium si   | 71/1844   | 254/9773 | 0.000228 | 0.002221 | 0.001293 | ErbB4/Cac   | 71    |
| mmu0466 | Fc epsilon   | 25/1844   | 66/9773  | 0.000229 | 0.002221 | 0.001293 | Inpp5d/Fc   | 25    |
| mmu0451 | ECM-rece     | 31/1844   | 89/9773  | 0.000258 | 0.002423 | 0.00141  | Fn1/Lamc    | 31    |
| mmu0516 | Influenza    | 52/1844   | 174/9773 | 0.00027  | 0.002423 | 0.00141  | Casp8/Rna   | 52    |
| mmu0516 | Measles -    | 45/1844   | 145/9773 | 0.000271 | 0.002423 | 0.00141  | Casp8/Fcg   | 45    |
| mmu0520 | Proteogly    | 59/1844   | 204/9773 | 0.000286 | 0.002496 | 0.001453 | Fzd5/ErbB   | 59    |
| mmu0522 | Small cell   | 32/1844   | 94/9773  | 0.000332 | 0.002823 | 0.001643 | Fn1/Lamc    | 32    |
| mmu0466 | TNF signa    | 38/1844   | 118/9773 | 0.00035  | 0.002903 | 0.00169  | Casp8/Cre   | 38    |
| mmu0406 | Chemokin     | 56/1844   | 193/9773 | 0.000369 | 0.002989 | 0.00174  | Cxcr1/Plck  | 56    |
| mmu0414 | Peroxisom    | 30/1844   | 87/9773  | 0.000392 | 0.003044 | 0.001772 | Acsl3/Phyl  | 30    |
| mmu0451 | Focal adhe   | 58/1844   | 202/9773 | 0.000394 | 0.003044 | 0.001772 | Fn1/Lamc    | 58    |
| mmu0406 | Cytokine-    | 79/1844   | 294/9773 | 0.000407 | 0.003073 | 0.001789 | Il17a/Il17f | 79    |
| mmu0514 | Amoebias     | 35/1844   | 108/9773 | 0.000516 | 0.003773 | 0.002196 | Il1r1/Fn1/I | 35    |
| mmu0496 | Collecting   | 13/1844   | 27/9773  | 0.000522 | 0.003773 | 0.002196 | Car2/Atp6   | 13    |
| mmu0421 | Ferroptosi   | 17/1844   | 41/9773  | 0.000678 | 0.0048   | 0.002794 | Acsl3/Slc7  | 17    |
| mmu0120 | Carbon m     | 38/1844   | 122/9773 | 0.000726 | 0.005035 | 0.002931 | Rpe/Acss2   | 38    |
| mmu0052 | Amino su     | 20/1844   | 52/9773  | 0.000752 | 0.005112 | 0.002975 | Cyb5r1/Nq   | 20    |
| mmu0497 | Gastric aci  | 26/1844   | 75/9773  | 0.000854 | 0.005691 | 0.003313 | Slc9a4/Atp  | 26    |
| mmu0541 | Dilated ca   | 33/1844   | 103/9773 | 0.000921 | 0.006021 | 0.003504 | Tnnt2/Tgf   | 33    |
| mmu0056 | Inositol p   | 25/1844   | 72/9773  | 0.001038 | 0.006554 | 0.003815 | Pikfyve/In  | 25    |
| mmu0041 | beta-Alan    | 14/1844   | 32/9773  | 0.001062 | 0.006554 | 0.003815 | Smox/Dpy    | 14    |
| mmu0521 | Pancreatic   | 26/1844   | 76/9773  | 0.001069 | 0.006554 | 0.003815 | Ralb/Tgfb   | 26    |
| mmu0462 | Toll-like r  | 33/1844   | 104/9773 | 0.001109 | 0.006554 | 0.003815 | Ly96/Casp   | 33    |
| mmu0521 | Prostate c   | 32/1844   | 100/9773 | 0.001118 | 0.006554 | 0.003815 | Creb3l1/L   | 32    |

|                     |          |          |          |          |          |            |     |
|---------------------|----------|----------|----------|----------|----------|------------|-----|
| mmu0541 Hypertrop   | 32/1844  | 100/9773 | 0.001118 | 0.006554 | 0.003815 | Tnnt2/Tgf  | 32  |
| mmu0516 Epstein-B   | 62/1844  | 228/9773 | 0.001188 | 0.006842 | 0.003983 | Casp8/Psr  | 62  |
| mmu0006 Fatty acid  | 13/1844  | 29/9773  | 0.001212 | 0.006842 | 0.003983 | Hacd1/Hs   | 13  |
| mmu0516 Human p     | 91/1844  | 359/9773 | 0.001228 | 0.006842 | 0.003983 | Casp8/Fzc  | 91  |
| mmu0465 Natural kil | 37/1844  | 122/9773 | 0.001458 | 0.007994 | 0.004653 | Zap70/Sh   | 37  |
| mmu0415 PI3K-Akt    | 92/1844  | 367/9773 | 0.001671 | 0.008999 | 0.005238 | Sgk3/Erb   | 92  |
| mmu0060 Sphingoli   | 20/1844  | 55/9773  | 0.001694 | 0.008999 | 0.005238 | Sgpp2/Ne   | 20  |
| mmu0522 Hepatocel   | 49/1844  | 175/9773 | 0.00193  | 0.010098 | 0.005877 | Gsta3/Fzd  | 49  |
| mmu0411 p53 signal  | 25/1844  | 75/9773  | 0.002    | 0.010301 | 0.005996 | Casp8/Rp   | 25  |
| mmu0104 Biosynthe   | 14/1844  | 34/9773  | 0.002152 | 0.010922 | 0.006357 | Hacd1/Hs   | 14  |
| mmu0407 Phosphati   | 30/1844  | 96/9773  | 0.002376 | 0.011727 | 0.006826 | Pikfyve/In | 30  |
| mmu0436 Axon guid   | 50/1844  | 181/9773 | 0.00238  | 0.011727 | 0.006826 | Nck2/Eph   | 50  |
| mmu0421 Necropto    | 49/1844  | 177/9773 | 0.002493 | 0.012111 | 0.007049 | Casp8/Us   | 49  |
| mmu0493 AGE-RAG     | 31/1844  | 101/9773 | 0.002773 | 0.013279 | 0.007729 | Fn1/Tgfb   | 31  |
| mmu0465 IL-17 sign  | 29/1844  | 93/9773  | 0.002884 | 0.013619 | 0.007927 | Il17a/Il17 | 29  |
| mmu0472 Synaptic v  | 25/1844  | 77/9773  | 0.002998 | 0.013774 | 0.008017 | Dnm3/Cac   | 25  |
| mmu0513 Pertussis   | -25/1844 | 77/9773  | 0.002998 | 0.013774 | 0.008017 | Ly96/Il1a  | 25  |
| mmu0451 Cell adhes  | 49/1844  | 179/9773 | 0.003194 | 0.014479 | 0.008428 | Pdcd1/Ptp  | 49  |
| mmu0467 Leukocyte   | 35/1844  | 119/9773 | 0.003401 | 0.015216 | 0.008856 | Ncf2/F11r  | 35  |
| mmu0516 Hepatitis   | 46/1844  | 167/9773 | 0.003687 | 0.016278 | 0.009475 | Casp8/Rn   | 46  |
| mmu0406 Viral prote | 29/1844  | 95/9773  | 0.004072 | 0.01775  | 0.010331 | Il18rap/Cx | 29  |
| mmu0007 Fatty acid  | 18/1844  | 52/9773  | 0.005201 | 0.022155 | 0.012895 | Acsl3/Had  | 18  |
| mmu0466 T cell rece | 35/1844  | 122/9773 | 0.005276 | 0.022155 | 0.012895 | Zap70/Nc   | 35  |
| mmu0465 Th17 cell   | 31/1844  | 105/9773 | 0.005293 | 0.022155 | 0.012895 | Il17a/Il17 | 31  |
| mmu0522 Chronic m   | 24/1844  | 76/9773  | 0.005343 | 0.022155 | 0.012895 | Tgfb2/Shc  | 24  |
| mmu0502 Pathways    | 113/1844 | 481/9773 | 0.005522 | 0.022622 | 0.013167 | Dnah7b/D   | 113 |
| mmu0332 PPAR sign   | 27/1844  | 89/9773  | 0.005984 | 0.02422  | 0.014097 | Acsl3/Slc2 | 27  |
| mmu0152 Platinum    | 25/1844  | 81/9773  | 0.00628  | 0.024978 | 0.014538 | Gsta3/Cas  | 25  |
| mmu0401 MAPK sigr   | 74/1844  | 299/9773 | 0.006318 | 0.024978 | 0.014538 | Il1r1/Erb  | 74  |
| mmu0028 Valine, leu | 19/1844  | 57/9773  | 0.006608 | 0.025824 | 0.015031 | Aox1/Aox   | 19  |
| mmu0402 cGMP-PK     | 46/1844  | 172/9773 | 0.006685 | 0.025828 | 0.015033 | Rgs2/Atp1  | 46  |
| mmu0065 Butanoate   | 11/1844  | 27/9773  | 0.006952 | 0.0265   | 0.015424 | Hmgcs2/H   | 11  |
| mmu0516 Human cy    | 64/1844  | 254/9773 | 0.007015 | 0.0265   | 0.015424 | Il1r1/Casp | 64  |
| mmu0516 Hepatitis   | 44/1844  | 164/9773 | 0.007407 | 0.027676 | 0.016109 | Casp8/Tgf  | 44  |
| mmu0421 Cellular se | 48/1844  | 182/9773 | 0.007524 | 0.027805 | 0.016184 | Lin9/Tgfb  | 48  |
| mmu0532 Inflammat   | 20/1844  | 62/9773  | 0.008109 | 0.029645 | 0.017255 | Il17a/Il17 | 20  |
| mmu0472 Neurotro    | 34/1844  | 121/9773 | 0.008322 | 0.030103 | 0.017521 | Shc1/Ngf   | 34  |
| mmu0516 Human T-    | 62/1844  | 247/9773 | 0.008576 | 0.030693 | 0.017865 | Il1r1/Elk4 | 62  |
| mmu0462 NOD-like    | 55/1844  | 216/9773 | 0.009515 | 0.033697 | 0.019613 | Casp8/Rn   | 55  |
| mmu0022 Arginine    | 9/1844   | 21/9773  | 0.009772 | 0.033982 | 0.019779 | Ass1/Nos   | 9   |
| mmu0027 Cysteine    | 18/1844  | 55/9773  | 0.00995  | 0.033982 | 0.019779 | Kyat1/Phg  | 18  |
| mmu0465 Th1 and T   | 26/1844  | 88/9773  | 0.009995 | 0.033982 | 0.019779 | Zap70/Ga   | 26  |
| mmu0521 Colorectal  | 26/1844  | 88/9773  | 0.009995 | 0.033982 | 0.019779 | Ralb/Tgfb  | 26  |
| mmu0407 Phospholi   | 40/1844  | 149/9773 | 0.010213 | 0.034379 | 0.02001  | Cxcr1/Dgk  | 40  |
| mmu0063 Glyoxylate  | 12/1844  | 32/9773  | 0.010497 | 0.034991 | 0.020366 | Acss2/Acc  | 12  |
| mmu0493 Insulin res | 31/1844  | 110/9773 | 0.010901 | 0.035985 | 0.020945 | Creb3l1/S  | 31  |
| mmu0522 Non-smal    | 22/1844  | 72/9773  | 0.011301 | 0.036947 | 0.021505 | Casp9/Pik  | 22  |
| mmu0062 Pyruvate    | 15/1844  | 44/9773  | 0.011996 | 0.038752 | 0.022555 | Acss2/Pck  | 15  |
| mmu0038 Tryptopha   | 17/1844  | 52/9773  | 0.012196 | 0.038752 | 0.022555 | Aox1/Aox   | 17  |
| mmu0201 ABC trans   | 17/1844  | 52/9773  | 0.012196 | 0.038752 | 0.022555 | Abcb1a/C   | 17  |
| mmu0492 Parathyroi  | 32/1844  | 116/9773 | 0.013532 | 0.042327 | 0.024636 | Gata3/Nr4  | 32  |
| mmu0426 Adrenergi   | 41/1844  | 156/9773 | 0.01357  | 0.042327 | 0.024636 | Tnnt2/Atp  | 41  |
| mmu0492 Oxytocin    | 40/1844  | 153/9773 | 0.015954 | 0.049125 | 0.028593 | Rgs2/Plcb  | 40  |
| mmu0502 Prion dise  | 66/1844  | 273/9773 | 0.016038 | 0.049125 | 0.028593 | Tuba4a/Pe  | 66  |
| mmu0497 Salivary se | 25/1844  | 87/9773  | 0.016304 | 0.049495 | 0.028808 | Atp1b1/Pl  | 25  |
| mmu0123 Biosynthe   | 23/1844  | 79/9773  | 0.017696 | 0.053246 | 0.030991 | Rpe/Pycr2  | 23  |
| mmu0497 Cholester   | 16/1844  | 50/9773  | 0.018255 | 0.054444 | 0.031689 | Soat1/Lrp  | 16  |
| mmu0523 PD-L1 exp   | 25/1844  | 88/9773  | 0.018808 | 0.055607 | 0.032365 | Zap70/Pd   | 25  |

|                     |          |          |          |          |          |             |    |
|---------------------|----------|----------|----------|----------|----------|-------------|----|
| mmu0090 Terpenoid   | 9/1844   | 23/9773  | 0.018982 | 0.055637 | 0.032383 | Fdps/Pmv    | 9  |
| mmu0472 Long-tern   | 20/1844  | 67/9773  | 0.019773 | 0.05746  | 0.033444 | Plcb2/Can   | 20 |
| mmu0497 Pancreatic  | 31/1844  | 115/9773 | 0.020625 | 0.059428 | 0.03459  | Sctr/Atp1k  | 31 |
| mmu0064 Propanoat   | 11/1844  | 31/9773  | 0.021753 | 0.062152 | 0.036175 | Acsc2/Dbt   | 11 |
| mmu0492 Adipocyto   | 21/1844  | 72/9773  | 0.0223   | 0.063092 | 0.036722 | Acsl3/Pck   | 21 |
| mmu0051 Other type  | 14/1844  | 43/9773  | 0.022636 | 0.063092 | 0.036722 | Galnt13/G   | 14 |
| mmu0025 Alanine, a  | 13/1844  | 39/9773  | 0.022639 | 0.063092 | 0.036722 | Ass1/Rimk   | 13 |
| mmu0541 Viral myoc  | 26/1844  | 94/9773  | 0.023521 | 0.065018 | 0.037843 | Casp8/Cd    | 26 |
| mmu0491 GnRH sign   | 25/1844  | 90/9773  | 0.024714 | 0.067763 | 0.039441 | Plcb2/Pla2  | 25 |
| mmu0454 Gap juncti  | 24/1844  | 86/9773  | 0.025954 | 0.069837 | 0.040648 | Tuba4a/Tu   | 24 |
| mmu0541 Arrhythm    | 24/1844  | 86/9773  | 0.025954 | 0.069837 | 0.040648 | Itga6/Itga  | 24 |
| mmu0407 Sphingoli   | 33/1844  | 126/9773 | 0.026086 | 0.069837 | 0.040648 | Sgpp2/Fce   | 33 |
| mmu0401 Rap1 sign   | 52/1844  | 214/9773 | 0.027358 | 0.071518 | 0.041626 | Ralb/Enah   | 52 |
| mmu0005 Galactose   | 11/1844  | 32/9773  | 0.027649 | 0.071518 | 0.041626 | B4galt1/G   | 11 |
| mmu0051 Mucin typ   | 11/1844  | 32/9773  | 0.027649 | 0.071518 | 0.041626 | Galnt13/G   | 11 |
| mmu0421 Apoptosis   | 11/1844  | 32/9773  | 0.027649 | 0.071518 | 0.041626 | Casp8/Bo    | 11 |
| mmu0026 Glycine, s  | 13/1844  | 40/9773  | 0.027911 | 0.071518 | 0.041626 | Gatm/Phg    | 13 |
| mmu0091 Nitrogen    | 7/1844   | 17/9773  | 0.027976 | 0.071518 | 0.041626 | Car3/Car2   | 7  |
| mmu0402 cAMP sign   | 54/1844  | 224/9773 | 0.028743 | 0.07293  | 0.042448 | Atp1b1/Ci   | 54 |
| mmu0520 Chemical    | 55/1844  | 229/9773 | 0.029411 | 0.074073 | 0.043114 | Gsta3/Slc2  | 55 |
| mmu0492 Regulatio   | 17/1844  | 57/9773  | 0.030406 | 0.076015 | 0.044244 | Ptgs1/Ptgs  | 17 |
| mmu0036 Phenylalar  | 8/1844   | 21/9773  | 0.031268 | 0.077599 | 0.045166 | Got1l1/Gc   | 8  |
| mmu0521 Bladder c   | 13/1844  | 41/9773  | 0.034026 | 0.083831 | 0.048793 | Thbs1/Fgf   | 13 |
| mmu0401 ErbB sign   | 23/1844  | 84/9773  | 0.035505 | 0.08669  | 0.050458 | Nck2/Erbk   | 23 |
| mmu0434 Hedgehog    | 17/1844  | 58/9773  | 0.035696 | 0.08669  | 0.050458 | lhh/Lrp2/F  | 17 |
| mmu0463 JAK-STAT    | 42/1844  | 171/9773 | 0.037408 | 0.090203 | 0.052502 | Aox1/Aox    | 42 |
| mmu0001 Glycolysis  | 19/1844  | 67/9773  | 0.037936 | 0.090832 | 0.052868 | Acsc2/Pck   | 19 |
| mmu0461 Neutroph    | 50/1844  | 209/9773 | 0.038859 | 0.092393 | 0.053777 | Ncf2/Fcgr   | 50 |
| mmu0098 Metabolis   | 21/1844  | 76/9773  | 0.039403 | 0.093036 | 0.054151 | Gsta3/Gst   | 21 |
| mmu0521 Basal cell  | 18/1844  | 63/9773  | 0.039763 | 0.093237 | 0.054268 | Fzd5/Bmp    | 18 |
| mmu0427 Vascular    | 36/1844  | 144/9773 | 0.040328 | 0.093914 | 0.054662 | Ramp1/Ca    | 36 |
| mmu0439 Hippo sign  | 39/1844  | 158/9773 | 0.040699 | 0.094133 | 0.05479  | Fzd5/Tgfb   | 39 |
| mmu0034 Histidine   | 9/1844   | 26/9773  | 0.042575 | 0.09715  | 0.056545 | Aldh2/Aox   | 9  |
| mmu0079 Folate bio  | 9/1844   | 26/9773  | 0.042575 | 0.09715  | 0.056545 | Fpgs/Ggh    | 9  |
| mmu0492 Glucagon    | 27/1844  | 104/9773 | 0.045503 | 0.102468 | 0.059641 | Creb3l1/P   | 27 |
| mmu0491 Insulin sec | 23/1844  | 86/9773  | 0.045508 | 0.102468 | 0.059641 | Atp1b1/Ci   | 23 |
| mmu0501 Huntingto   | 70/1844  | 308/9773 | 0.048343 | 0.108136 | 0.06294  | Dnah7b/C    | 70 |
| mmu0431 Wnt signa   | 42/1844  | 175/9773 | 0.052191 | 0.115979 | 0.067505 | Sox17/Fzc   | 42 |
| mmu0056 Glyceroph   | 26/1844  | 101/9773 | 0.053693 | 0.118048 | 0.068709 | Dgkd/Pnp    | 26 |
| mmu0521 Glioma - I  | 20/1844  | 74/9773  | 0.053816 | 0.118048 | 0.068709 | Shc1/Cam    | 20 |
| mmu0501 Alzheimer   | 86/1844  | 389/9773 | 0.056764 | 0.123716 | 0.072008 | Casp8/Fzc   | 86 |
| mmu0493 Cushing s   | 39/1844  | 162/9773 | 0.057205 | 0.123883 | 0.072105 | Fzd5/Pde1   | 39 |
| mmu0501 Amyotrop    | 83/1844  | 375/9773 | 0.059018 | 0.127001 | 0.07392  | Dnah7b/C    | 83 |
| mmu0035 Tyrosine    | 12/1844  | 40/9773  | 0.060397 | 0.128495 | 0.07479  | Aox1/Aox    | 12 |
| mmu0123 Nucleotid   | 22/1844  | 84/9773  | 0.060889 | 0.128495 | 0.07479  | Nme7/Ent    | 22 |
| mmu0475 Inflamm     | 32/1844  | 130/9773 | 0.061224 | 0.128495 | 0.07479  | Il1r1/Plcb2 | 32 |
| mmu0492 Relaxin si  | 32/1844  | 130/9773 | 0.061224 | 0.128495 | 0.07479  | Creb3l1/P   | 32 |
| mmu0005 Fructose    | 11/1844  | 36/9773  | 0.062645 | 0.130671 | 0.076056 | Akr1b8/Al   | 11 |
| mmu0437 VEGF sign   | 16/1844  | 58/9773  | 0.067219 | 0.138511 | 0.080619 | Pla2g4f/N   | 16 |
| mmu0521 Endometri   | 16/1844  | 58/9773  | 0.067219 | 0.138511 | 0.080619 | Lef1/Casp   | 16 |
| mmu0541 Diabetic    | 50/1844  | 217/9773 | 0.069174 | 0.141682 | 0.082465 | Ncf2/Parp   | 50 |
| mmu0098 Drug met    | 19/1844  | 72/9773  | 0.072732 | 0.148078 | 0.086188 | Gsta3/Aox   | 19 |
| mmu0461 Renin-ang   | 11/1844  | 37/9773  | 0.074558 | 0.15089  | 0.087825 | Ctsa/Enpe   | 11 |
| mmu0462 Cytosolic   | 121/1844 | 82/9773  | 0.080637 | 0.162228 | 0.094424 | Casp8/Ain   | 21 |
| mmu0048 Glutathior  | 19/1844  | 73/9773  | 0.081658 | 0.162362 | 0.094502 | Gsta3/Gst   | 19 |
| mmu0462 RIG-I-like  | 19/1844  | 73/9773  | 0.081658 | 0.162362 | 0.094502 | Casp8/Tar   | 19 |
| mmu0060 Glycosph    | 6/1844   | 17/9773  | 0.083896 | 0.164498 | 0.095745 | Gbgt1/Sec   | 6  |
| mmu0326 Virion - E  | 6/1844   | 17/9773  | 0.083896 | 0.164498 | 0.095745 | Fcgr2b/Cc   | 6  |

|                      |         |          |          |          |          |            |    |
|----------------------|---------|----------|----------|----------|----------|------------|----|
| mmu0461 Antigen p    | 22/1844 | 87/9773  | 0.084184 | 0.164498 | 0.095745 | Rfx5/Ctss/ | 22 |
| mmu0452 Adherens     | 23/1844 | 92/9773  | 0.087488 | 0.169016 | 0.098375 | Lef1/Map3  | 23 |
| mmu0125 Biosynthe    | 11/1844 | 38/9773  | 0.087809 | 0.169016 | 0.098375 | Uap1/Gale  | 11 |
| mmu0437 Apelin sig   | 33/1844 | 139/9773 | 0.087988 | 0.169016 | 0.098375 | Plcb2/Tgfb | 33 |
| mmu0491 Thyroid hc   | 19/1844 | 74/9773  | 0.091277 | 0.174287 | 0.101443 | Atp1b1/Lr  | 19 |
| mmu0517 Human im     | 54/1844 | 241/9773 | 0.092302 | 0.174287 | 0.101443 | Casp8/Ap   | 54 |
| mmu0406 HIF-1 sigr   | 28/1844 | 116/9773 | 0.092782 | 0.174287 | 0.101443 | Angpt4/Ci  | 28 |
| mmu0472 Glutamate    | 28/1844 | 116/9773 | 0.092782 | 0.174287 | 0.101443 | Slc1a2/Plc | 28 |
| mmu0051 Various ty   | 12/1844 | 43/9773  | 0.09673  | 0.180704 | 0.105178 | Mgat4a/V   | 12 |
| mmu0326 Virion - H   | 4/1844  | 10/9773  | 0.101688 | 0.188928 | 0.109964 | Cd209b/C   | 4  |
| mmu0514 African try  | 11/1844 | 39/9773  | 0.102406 | 0.189229 | 0.11014  | Plcb2/Npp  | 11 |
| mmu0496 Proximal t   | 7/1844  | 22/9773  | 0.104246 | 0.189382 | 0.110228 | Atp1b1/Pc  | 7  |
| mmu0056 Ether lipid  | 13/1844 | 48/9773  | 0.104608 | 0.189382 | 0.110228 | Lpcat4/Pla | 13 |
| mmu0493 Type II dia  | 13/1844 | 48/9773  | 0.104608 | 0.189382 | 0.110228 | Cacna1e/C  | 13 |
| mmu0514 Malaria -    | 15/1844 | 57/9773  | 0.104717 | 0.189382 | 0.110228 | Tgfb2/Thk  | 15 |
| mmu0411 Oocyte m     | 29/1844 | 123/9773 | 0.111701 | 0.200643 | 0.116783 | Bub1/Aurl  | 29 |
| mmu0522 Breast can   | 34/1844 | 147/9773 | 0.112124 | 0.200643 | 0.116783 | Fzd5/Hey   | 34 |
| mmu0406 FoxO sign    | 31/1844 | 133/9773 | 0.115517 | 0.205167 | 0.119416 | Sgk3/Tgfb  | 31 |
| mmu0098 Drug met     | 23/1844 | 95/9773  | 0.115859 | 0.205167 | 0.119416 | Gsta3/Nm   | 23 |
| mmu0060 Glycosphii   | 8/1844  | 27/9773  | 0.120591 | 0.21244  | 0.123649 | Fut7/Ggta  | 8  |
| mmu0401 Ras signal   | 52/1844 | 236/9773 | 0.121278 | 0.212548 | 0.123712 | Zap70/Ral  | 52 |
| mmu0056 Glycerolip   | 16/1844 | 63/9773  | 0.123338 | 0.215051 | 0.125169 | Mogat1/D   | 16 |
| mmu0491 Estrogen s   | 31/1844 | 134/9773 | 0.124348 | 0.215706 | 0.12555  | Creb3l1/P  | 31 |
| mmu0491 Thyroid hc   | 28/1844 | 120/9773 | 0.128204 | 0.221265 | 0.128786 | Atp1b1/It  | 28 |
| mmu0031 Lysine de    | 16/1844 | 64/9773  | 0.137118 | 0.235454 | 0.137045 | Smyd3/Bb   | 16 |
| mmu0522 Gastric ca   | 34/1844 | 150/9773 | 0.137857 | 0.235535 | 0.137091 | Fzd5/Tgfb  | 34 |
| mmu0472 Dopamine     | 31/1844 | 136/9773 | 0.14323  | 0.243492 | 0.141723 | Cacna1b/C  | 31 |
| mmu0521 Thyroid c    | 10/1844 | 37/9773  | 0.144903 | 0.24467  | 0.142409 | Tpm3/Lef   | 10 |
| mmu0152 Endocrine    | 22/1844 | 93/9773  | 0.14662  | 0.24467  | 0.142409 | Shc1/Pik3  | 22 |
| mmu0491 Progester    | 22/1844 | 93/9773  | 0.14662  | 0.24467  | 0.142409 | Bub1/Aurl  | 22 |
| mmu0493 Growth hc    | 27/1844 | 117/9773 | 0.146802 | 0.24467  | 0.142409 | Creb3l1/P  | 27 |
| mmu0414 Endocytos    | 58/1844 | 270/9773 | 0.150701 | 0.249943 | 0.145478 | Smap1/Cx   | 58 |
| mmu0472 Cholinergi   | 26/1844 | 113/9773 | 0.156002 | 0.256529 | 0.149311 | Cacna1b/C  | 26 |
| mmu0522 Acute my     | 17/1844 | 70/9773  | 0.156181 | 0.256529 | 0.149311 | Spi1/Lef1  | 17 |
| mmu0152 Antifolate   | 8/1844  | 29/9773  | 0.165923 | 0.27122  | 0.157862 | Fpgs/Ggh   | 8  |
| mmu0467 Intestinal i | 11/1844 | 43/9773  | 0.173817 | 0.281796 | 0.164017 | Pigr/Itga4 | 11 |
| mmu0491 Melanoge     | 23/1844 | 100/9773 | 0.17436  | 0.281796 | 0.164017 | Fzd5/Creb  | 23 |
| mmu0492 Renin secr   | 18/1844 | 76/9773  | 0.174879 | 0.281796 | 0.164017 | Plcb2/Cic  | 18 |
| mmu0531 Asthma -     | 7/1844  | 25/9773  | 0.177767 | 0.285098 | 0.165939 | Fcer1g/Il4 | 7  |
| mmu0521 Melanom      | 17/1844 | 72/9773  | 0.187049 | 0.298577 | 0.173785 | Pik3cd/Cd  | 17 |
| mmu0053 Glycosami    | 6/1844  | 21/9773  | 0.190567 | 0.301362 | 0.175406 | Gusb/Hex   | 6  |
| mmu0077 Pantothen    | 6/1844  | 21/9773  | 0.190567 | 0.301362 | 0.175406 | Dpyd/Aldl  | 6  |
| mmu0492 GnRH secr    | 15/1844 | 63/9773  | 0.196492 | 0.309294 | 0.180022 | Plcb2/Hcn  | 15 |
| mmu0497 Vitamin di   | 7/1844  | 26/9773  | 0.206153 | 0.323004 | 0.188002 | Slc5a6/Fol | 7  |
| mmu0523 Choline m    | 22/1844 | 98/9773  | 0.214396 | 0.334379 | 0.194623 | Dgkd/Ral   | 22 |
| mmu0492 Aldosteroi   | 23/1844 | 103/9773 | 0.215788 | 0.335013 | 0.194992 | Atp1b1/N   | 23 |
| mmu0520 Viral carci  | 48/1844 | 228/9773 | 0.21936  | 0.338387 | 0.196956 | Casp8/Cre  | 48 |
| mmu0491 Prolactin s  | 17/1844 | 74/9773  | 0.220666 | 0.338387 | 0.196956 | Tnfrsf11a/ | 17 |
| mmu0472 Retrograd    | 33/1844 | 153/9773 | 0.222042 | 0.338387 | 0.196956 | Cacna1b/I  | 33 |
| mmu0415 mTOR sig     | 34/1844 | 158/9773 | 0.222165 | 0.338387 | 0.196956 | Fzd5/Prr5l | 34 |
| mmu0043 Taurine ar   | 6/1844  | 22/9773  | 0.222938 | 0.338387 | 0.196956 | Fmo6/Acn   | 6  |
| mmu0059 Arachidon    | 20/1844 | 89/9773  | 0.22677  | 0.341165 | 0.198573 | Ptges2/Pt  | 20 |
| mmu0004 Pentose al   | 9/1844  | 36/9773  | 0.226775 | 0.341165 | 0.198573 | Rpe/Akr1a  | 9  |
| mmu0024 Pyrimidine   | 13/1844 | 56/9773  | 0.247634 | 0.370905 | 0.215883 | Nme7/Ent   | 13 |
| mmu0414 Autophag     | 35/1844 | 167/9773 | 0.271195 | 0.403782 | 0.235019 | Atg9a/Rak  | 35 |
| mmu0520 Chemical     | 47/1844 | 228/9773 | 0.271959 | 0.403782 | 0.235019 | Gsta3/Cac  | 47 |
| mmu0497 Fat digesti  | 10/1844 | 43/9773  | 0.284461 | 0.420507 | 0.244753 | Mttp/Pla2  | 10 |
| mmu0326 Virion - FI  | 3/1844  | 10/9773  | 0.288264 | 0.422456 | 0.245888 | Cd209b/C   | 3  |

|         |              |         |          |          |          |          |              |    |
|---------|--------------|---------|----------|----------|----------|----------|--------------|----|
| mmu0326 | Virion - H   | 3/1844  | 10/9773  | 0.288264 | 0.422456 | 0.245888 | Pilra/Iltga5 | 3  |
| mmu0515 | Staphyloc    | 27/1844 | 128/9773 | 0.291061 | 0.424724 | 0.247208 | Fcgr2b/Fc    | 27 |
| mmu0433 | Notch sigr   | 14/1844 | 63/9773  | 0.292934 | 0.424837 | 0.247274 | Ncstn/Cir1   | 14 |
| mmu0497 | Protein di   | 23/1844 | 108/9773 | 0.293637 | 0.424837 | 0.247274 | Col5a2/At    | 23 |
| mmu0023 | Purine me    | 28/1844 | 134/9773 | 0.305184 | 0.439672 | 0.255908 | Nme7/Ent     | 28 |
| mmu0060 | Glycosphi    | 4/1844  | 15/9773  | 0.309692 | 0.442008 | 0.257268 | St6galnac    | 4  |
| mmu0073 | Thiamine     | 4/1844  | 15/9773  | 0.309692 | 0.442008 | 0.257268 | Ak8/Ak1/     | 4  |
| mmu0496 | Vasopress    | 10/1844 | 44/9773  | 0.310869 | 0.442008 | 0.257268 | Creb3l1/D    | 10 |
| mmu0471 | Circadian    | 21/1844 | 99/9773  | 0.312005 | 0.442008 | 0.257268 | Plcb2/Can    | 21 |
| mmu0491 | Insulin sig  | 29/1844 | 140/9773 | 0.318922 | 0.449932 | 0.26188  | Pygb/Pck1    | 29 |
| mmu0471 | Thermoge     | 48/1844 | 238/9773 | 0.326977 | 0.457485 | 0.266276 | Acsl3/Crek   | 48 |
| mmu0435 | TGF-beta     | 23/1844 | 110/9773 | 0.32719  | 0.457485 | 0.266276 | Tgfb2/Thk    | 23 |
| mmu0059 | alpha-Linc   | 6/1844  | 25/9773  | 0.328313 | 0.457485 | 0.266276 | Pla2g4f/Pl   | 6  |
| mmu0050 | Starch anc   | 8/1844  | 35/9773  | 0.335324 | 0.463515 | 0.269786 | Pygb/Amy     | 8  |
| mmu0521 | Renal cell   | 15/1844 | 70/9773  | 0.336413 | 0.463515 | 0.269786 | Tgfb2/Pik    | 15 |
| mmu0473 | Long-tern    | 13/1844 | 60/9773  | 0.337743 | 0.463515 | 0.269786 | Plcb2/Pla2   | 13 |
| mmu0497 | Mineral ak   | 12/1844 | 55/9773  | 0.338093 | 0.463515 | 0.269786 | Slc26a9/A    | 12 |
| mmu0013 | Ubiquinor    | 3/1844  | 11/9773  | 0.345037 | 0.46925  | 0.273124 | Coq3/Vko     | 3  |
| mmu0092 | Sulfur met   | 3/1844  | 11/9773  | 0.345037 | 0.46925  | 0.273124 | Bpnt1/Suc    | 3  |
| mmu0534 | Primary in   | 8/1844  | 36/9773  | 0.366338 | 0.496234 | 0.28883  | Zap70/Ptp    | 8  |
| mmu0408 | Neuroacti    | 76/1844 | 390/9773 | 0.395697 | 0.533877 | 0.31074  | Prlh/Sctr/C  | 76 |
| mmu0474 | Phototran    | 6/1844  | 27/9773  | 0.401779 | 0.53994  | 0.314268 | Sag/Pde6l    | 6  |
| mmu0493 | Non-alcol    | 32/1844 | 162/9773 | 0.417415 | 0.558744 | 0.325213 | Casp8/Il1a   | 32 |
| mmu0411 | Cell cycle   | 31/1844 | 157/9773 | 0.420658 | 0.560878 | 0.326455 | Mcm3/Tgf     | 31 |
| mmu0124 | Biosynthe    | 30/1844 | 152/9773 | 0.42399  | 0.563112 | 0.327756 | Nme7/Km      | 30 |
| mmu0503 | Amphetar     | 14/1844 | 69/9773  | 0.428817 | 0.565108 | 0.328917 | Creb3l1/C    | 14 |
| mmu0523 | Central ca   | 14/1844 | 69/9773  | 0.428817 | 0.565108 | 0.328917 | Pik3cd/Fg    | 14 |
| mmu0415 | AMPK sigr    | 25/1844 | 127/9773 | 0.442212 | 0.578337 | 0.336617 | Creb3l1/P    | 25 |
| mmu0152 | EGFR tyro    | 16/1844 | 80/9773  | 0.442258 | 0.578337 | 0.336617 | Shc1/Jak1    | 16 |
| mmu0497 | Bile secret  | 20/1844 | 101/9773 | 0.444757 | 0.579377 | 0.337223 | Sctr/Atp1k   | 20 |
| mmu0012 | Primary bi   | 4/1844  | 18/9773  | 0.449693 | 0.583571 | 0.339664 | Cyp7b1/A     | 4  |
| mmu0533 | Allograft r  | 12/1844 | 60/9773  | 0.462827 | 0.596724 | 0.347319 | Il12b/Il4/H  | 12 |
| mmu0003 | Pentose p    | 7/1844  | 34/9773  | 0.466849 | 0.596724 | 0.347319 | Rpe/H6pd     | 7  |
| mmu0121 | 2-Oxocar     | 7/1844  | 34/9773  | 0.466849 | 0.596724 | 0.347319 | Dbt/Aco1     | 7  |
| mmu0471 | Circadian    | 7/1844  | 34/9773  | 0.466849 | 0.596724 | 0.347319 | Npas2/Prk    | 7  |
| mmu0006 | Fatty acid   | 4/1844  | 19/9773  | 0.494662 | 0.629907 | 0.366633 | Acsl3/Ola    | 4  |
| mmu0492 | Cortisol sy  | 14/1844 | 72/9773  | 0.4978   | 0.631538 | 0.367582 | Creb3l1/P    | 14 |
| mmu0325 | Viral life c | 12/1844 | 63/9773  | 0.536552 | 0.67817  | 0.394724 | Map1a/Se     | 12 |
| mmu0516 | Herpes sir   | 87/1844 | 464/9773 | 0.546267 | 0.687892 | 0.400383 | Casp8/Rna    | 87 |
| mmu0501 | Parkinson    | 51/1844 | 274/9773 | 0.568623 | 0.713215 | 0.415122 | Tuba4a/Pe    | 51 |
| mmu0455 | Signaling    | 26/1844 | 140/9773 | 0.570572 | 0.713215 | 0.415122 | Fzd5/Bmp     | 26 |
| mmu0002 | Citrate cyc  | 6/1844  | 32/9773  | 0.578175 | 0.718871 | 0.418414 | Pck1/Aco1    | 6  |
| mmu0076 | Nicotinate   | 8/1844  | 43/9773  | 0.579325 | 0.718871 | 0.418414 | Aox1/Aox     | 8  |
| mmu0497 | Carbohydr    | 9/1844  | 49/9773  | 0.593542 | 0.732395 | 0.426286 | Atp1b1/Pl    | 9  |
| mmu0533 | Graft-vers   | 11/1844 | 60/9773  | 0.594533 | 0.732395 | 0.426286 | Il1a/H2-D    | 11 |
| mmu0413 | SNARE int    | 6/1844  | 33/9773  | 0.610331 | 0.749143 | 0.436033 | Vamp4/Sr     | 6  |
| mmu0426 | Cardiac m    | 16/1844 | 89/9773  | 0.628092 | 0.766296 | 0.446018 | Tnnt2/Atp    | 16 |
| mmu0494 | Type I dial  | 12/1844 | 67/9773  | 0.628814 | 0.766296 | 0.446018 | Il1a/Il12b/  | 12 |
| mmu0503 | Nicotine a   | 7/1844  | 40/9773  | 0.650919 | 0.790401 | 0.460048 | Cacna1b/C    | 7  |
| mmu0051 | Mannose      | 4/1844  | 23/9773  | 0.655266 | 0.792849 | 0.461472 | B4galt1/La   | 4  |
| mmu0019 | Oxidative    | 25/1844 | 141/9773 | 0.669482 | 0.807176 | 0.469812 | Ndufb5/A     | 25 |
| mmu0472 | Serotoner    | 24/1844 | 136/9773 | 0.67697  | 0.813321 | 0.473388 | Cacna1b/I    | 24 |
| mmu0086 | Porphyrin    | 8/1844  | 47/9773  | 0.684804 | 0.816959 | 0.475505 | Blvra/Ugt2   | 8  |
| mmu0341 | Base excis   | 8/1844  | 47/9773  | 0.684804 | 0.816959 | 0.475505 | Parp1/Rfc    | 8  |
| mmu0051 | N-Glycan     | 9/1844  | 53/9773  | 0.69167  | 0.822264 | 0.478594 | Mgat4a/V     | 9  |
| mmu0005 | Ascorbate    | 5/1844  | 31/9773  | 0.721887 | 0.849085 | 0.494204 | Akr1a1/Uc    | 5  |
| mmu0301 | RNA degr     | 14/1844 | 83/9773  | 0.722378 | 0.849085 | 0.494204 | Xrn2/Exos    | 14 |
| mmu0067 | One carb     | 3/1844  | 19/9773  | 0.72422  | 0.849085 | 0.494204 | Amt/Aldh     | 3  |

|                     |         |          |          |          |          |            |    |
|---------------------|---------|----------|----------|----------|----------|------------|----|
| mmu0078 Lipoic acic | 3/1844  | 19/9773  | 0.72422  | 0.849085 | 0.494204 | Dbt/Acsm   | 3  |
| mmu0421 Longevity   | 10/1844 | 61/9773  | 0.73883  | 0.863238 | 0.502442 | Hdac1/Pik  | 10 |
| mmu0520 Chemical    | 15/1844 | 90/9773  | 0.744072 | 0.865232 | 0.503603 | Gsta3/Gsti | 15 |
| mmu0501 Spinocere   | 24/1844 | 141/9773 | 0.745627 | 0.865232 | 0.503603 | Psmd1/Plc  | 24 |
| mmu0496 Aldosterol  | 6/1844  | 38/9773  | 0.748533 | 0.86565  | 0.503846 | Atp1b1/Pi  | 6  |
| mmu0053 Glycosami   | 2/1844  | 14/9773  | 0.772353 | 0.889659 | 0.51782  | B3gnt7/B4  | 2  |
| mmu0503 Morphine    | 15/1844 | 92/9773  | 0.774527 | 0.889659 | 0.51782  | Cacna1b/f  | 15 |
| mmu0053 Glycosami   | 3/1844  | 21/9773  | 0.786707 | 0.900607 | 0.524192 | Chpf2/Dse  | 3  |
| mmu0414 Protein pr  | 29/1844 | 175/9773 | 0.809734 | 0.923858 | 0.537725 | Bag2/Ugg   | 29 |
| mmu0413 Mitophag    | 16/1844 | 101/9773 | 0.81732  | 0.929393 | 0.540947 | Atg9a/Rak  | 16 |
| mmu0503 Cocaine a   | 7/1844  | 48/9773  | 0.827049 | 0.937323 | 0.545562 | Creb3l1/G  | 7  |
| mmu0496 Endocrine   | 9/1844  | 61/9773  | 0.838557 | 0.947207 | 0.551315 | Dnm3/Atp   | 9  |
| mmu0532 Systemic l  | 24/1844 | 150/9773 | 0.844014 | 0.950214 | 0.553066 | Fcgr4/Fcg  | 24 |
| mmu0053 Glycosami   | 3/1844  | 24/9773  | 0.858023 | 0.957127 | 0.557089 | Hs6st3/Ext | 3  |
| mmu0045 Selenocon   | 2/1844  | 17/9773  | 0.858599 | 0.957127 | 0.557089 | Kyat1/Kya  | 2  |
| mmu0498 Cobalamir   | 2/1844  | 17/9773  | 0.858599 | 0.957127 | 0.557089 | Tcn2/Abcc  | 2  |
| mmu0532 Autoimmu    | 11/1844 | 76/9773  | 0.873114 | 0.970126 | 0.564656 | Il4/Tshr/H | 11 |
| mmu0491 Ovarian st  | 9/1844  | 64/9773  | 0.876963 | 0.970457 | 0.564848 | Hsd17b7/I  | 9  |
| mmu0413 Autophag    | 4/1844  | 32/9773  | 0.87912  | 0.970457 | 0.564848 | Atg9a/Atg  | 4  |
| mmu0346 Fanconi a   | 7/1844  | 52/9773  | 0.884135 | 0.972835 | 0.566232 | Ube2t/Cer  | 7  |
| mmu0472 GABAergic   | 13/1844 | 90/9773  | 0.890509 | 0.976361 | 0.568285 | Cacna1b/C  | 13 |
| mmu0056 Glycosylp   | 3/1844  | 26/9773  | 0.893083 | 0.976361 | 0.568285 | Pgap1/Pig  | 3  |
| mmu0439 Hippo sig   | 3/1844  | 27/9773  | 0.907519 | 0.985803 | 0.57378  | Rassf4/Pal | 3  |
| mmu0495 Maturity c  | 3/1844  | 27/9773  | 0.907519 | 0.985803 | 0.57378  | Nkx2-2/G   | 3  |
| mmu0014 Steroid hc  | 14/1844 | 99/9773  | 0.913503 | 0.986833 | 0.57438  | Hsd17b7/I  | 14 |
| mmu0517 Coronavir   | 54/1844 | 334/9773 | 0.914272 | 0.986833 | 0.57438  | Fcgr3/F2/I | 54 |
| mmu0306 Protein ex  | 5/1844  | 42/9773  | 0.919243 | 0.989059 | 0.575675 | Sec61a1/S  | 5  |
| mmu0303 DNA repli   | 4/1844  | 36/9773  | 0.928658 | 0.996037 | 0.579737 | Mcm3/Rfc   | 4  |
| mmu0345 Non-hom     | 1/1844  | 13/9773  | 0.934133 | 0.99798  | 0.580868 | Polm       | 1  |
| mmu0421 Longevity   | 12/1844 | 90/9773  | 0.93634  | 0.99798  | 0.580868 | Creb3l1/P  | 12 |
| mmu0342 Nucleotid   | 7/1844  | 58/9773  | 0.939675 | 0.998405 | 0.581115 | Rfc2/Xpc/  | 7  |
| mmu0059 Linoleic ac | 6/1844  | 55/9773  | 0.962026 | 1        | 0.582043 | Pla2g4f/Pl | 6  |
| mmu0344 Homologc    | 4/1844  | 42/9773  | 0.969299 | 1        | 0.582043 | Rad54l/Ra  | 4  |
| mmu0520 MicroRNA    | 45/1844 | 303/9773 | 0.973352 | 1        | 0.582043 | Tnn/Tgfb2  | 45 |
| mmu0520 Transcript  | 32/1844 | 226/9773 | 0.975564 | 1        | 0.582043 | Eya1/Elk4/ | 32 |
| mmu0083 Retinol m   | 12/1844 | 102/9773 | 0.980579 | 1        | 0.582043 | Aox1/Aox   | 12 |
| mmu0308 ATP-depe    | 17/1844 | 136/9773 | 0.982441 | 1        | 0.582043 | H2az1/Hd   | 17 |
| mmu0503 Alcoholisn  | 28/1844 | 207/9773 | 0.984035 | 1        | 0.582043 | Creb3l1/Si | 28 |
| mmu0474 Taste tran  | 10/1844 | 92/9773  | 0.987044 | 1        | 0.582043 | Scn3a/Plcl | 10 |
| mmu0343 Mismatch    | 1/1844  | 23/9773  | 0.991895 | 1        | 0.582043 | Rfc2       | 1  |
| mmu0301 mRNA sur    | 11/1844 | 104/9773 | 0.992743 | 1        | 0.582043 | Ppp2r2c/L  | 11 |
| mmu0302 Basal tran  | 3/1844  | 44/9773  | 0.99378  | 1        | 0.582043 | Gtf2e2/Mr  | 3  |
| mmu0301 Nucleocyt   | 12/1844 | 118/9773 | 0.996782 | 1        | 0.582043 | Nup214/N   | 12 |
| mmu0097 Aminoacy    | 5/1844  | 66/9773  | 0.997209 | 1        | 0.582043 | Farsb/Aars | 5  |
| mmu0412 Ubiquitin   | 16/1844 | 154/9773 | 0.998672 | 1        | 0.582043 | Smurf1/Ck  | 16 |
| mmu0302 RNA polyr   | 1/1844  | 32/9773  | 0.998773 | 1        | 0.582043 | Polr3k     | 1  |
| mmu0305 Proteasom   | 2/1844  | 47/9773  | 0.999369 | 1        | 0.582043 | Psmd1/Ps   | 2  |
| mmu0308 Polycomb    | 6/1844  | 87/9773  | 0.9996   | 1        | 0.582043 | L3mbtl1/f  | 6  |
| mmu0300 Ribosome    | 6/1844  | 125/9773 | 0.999999 | 1        | 0.582043 | Xrn2/Rbm   | 6  |
| mmu0304 Spliceosor  | 12/1844 | 260/9773 | 1        | 1        | 0.582043 | Plrg1/Sf3k | 12 |
| mmu0301 Ribosome    | 11/1844 | 265/9773 | 1        | 1        | 0.582043 | Mrps9/Mr   | 11 |

**Supplementary Table 6** KEGG pathways enriched from DEGs between the Pten<sup>d/d</sup>ELF3<sup>OV</sup> vs WT groups

| ID      | Descriptio  | GeneRatic | BgRatio  | pvalue   | p.adjust | qvalue   | geneID      | Count |
|---------|-------------|-----------|----------|----------|----------|----------|-------------|-------|
| mmu0482 | Cytoskelet  | 141/3105  | 232/9773 | 3.67E-20 | 1.25E-17 | 4.75E-18 | Fhl2/Col3a  | 141   |
| mmu0414 | Lysosome    | 90/3105   | 135/9773 | 5.95E-17 | 1.01E-14 | 3.85E-15 | Atp6v1h/S   | 90    |
| mmu0466 | Fc gamma    | 61/3105   | 94/9773  | 3.63E-11 | 4.11E-09 | 1.57E-09 | Arpc2/Act   | 61    |
| mmu0515 | Tuberculo   | 99/3105   | 180/9773 | 6.96E-11 | 5.91E-09 | 2.25E-09 | Atp6v1h/S   | 99    |
| mmu0532 | Rheumato    | 57/3105   | 87/9773  | 9.05E-11 | 6.16E-09 | 2.34E-09 | Atp6v1h/C   | 57    |
| mmu0461 | Platelet ac | 72/3105   | 125/9773 | 1.87E-09 | 1.06E-07 | 4.03E-08 | Col3a1/Pl   | 72    |
| mmu0513 | Salmonell   | 123/3105  | 252/9773 | 8.88E-09 | 4.31E-07 | 1.64E-07 | Ly96/Casp   | 123   |
| mmu0541 | Hypertrop   | 59/3105   | 100/9773 | 1.60E-08 | 6.78E-07 | 2.58E-07 | Des/Tnnt2   | 59    |
| mmu0481 | Regulator   | 113/3105  | 232/9773 | 4.13E-08 | 1.56E-06 | 5.94E-07 | Fn1/Arpc2   | 113   |
| mmu0414 | Phagosom    | 93/3105   | 183/9773 | 5.22E-08 | 1.77E-06 | 6.76E-07 | Atp6v1h/M   | 93    |
| mmu0462 | C-type lec  | 63/3105   | 112/9773 | 6.55E-08 | 2.02E-06 | 7.71E-07 | Stat1/Casp  | 63    |
| mmu0438 | Osteoclast  | 73/3105   | 136/9773 | 8.44E-08 | 2.39E-06 | 9.11E-07 | Il1r1/Fhl2/ | 73    |
| mmu0513 | Legionell   | 39/3105   | 60/9773  | 1.18E-07 | 3.10E-06 | 1.18E-06 | Clk1/Casp   | 39    |
| mmu0520 | Proteoglyc  | 100/3105  | 204/9773 | 1.67E-07 | 4.05E-06 | 1.54E-06 | Fzd5/Erbp   | 100   |
| mmu0541 | Diabetic c  | 105/3105  | 217/9773 | 1.89E-07 | 4.28E-06 | 1.63E-06 | Cox5b/Co    | 105   |
| mmu0541 | Dilated ca  | 58/3105   | 103/9773 | 2.06E-07 | 4.37E-06 | 1.66E-06 | Des/Tnnt2   | 58    |
| mmu0414 | Efferocyto  | 82/3105   | 161/9773 | 2.82E-07 | 5.64E-06 | 2.15E-06 | Xkr9/Gulp   | 82    |
| mmu0436 | Axon guid   | 90/3105   | 181/9773 | 3.07E-07 | 5.79E-06 | 2.21E-06 | Sema4c/N    | 90    |
| mmu0541 | Arrhythm    | 50/3105   | 86/9773  | 3.73E-07 | 6.67E-06 | 2.54E-06 | Des/Itga8/  | 50    |
| mmu0426 | Adrenergi   | 79/3105   | 156/9773 | 6.27E-07 | 1.07E-05 | 4.06E-06 | Bcl2/Tnnt2  | 79    |
| mmu0541 | Lipid and   | 102/3105  | 217/9773 | 1.57E-06 | 2.55E-05 | 9.69E-06 | Ly96/Casp   | 102   |
| mmu0541 | Fluid shea  | 74/3105   | 148/9773 | 2.61E-06 | 4.03E-05 | 1.53E-05 | Gsta3/Il1r  | 74    |
| mmu0451 | Focal adhe  | 95/3105   | 202/9773 | 3.46E-06 | 5.11E-05 | 1.95E-05 | Fn1/Bcl2/L  | 95    |
| mmu0332 | PPAR sign   | 49/3105   | 89/9773  | 4.29E-06 | 6.08E-05 | 2.31E-05 | Acadl/Cyp   | 49    |
| mmu0493 | AGE-RAG     | 54/3105   | 101/9773 | 4.66E-06 | 6.34E-05 | 2.42E-05 | Col3a1/St   | 54    |
| mmu0516 | Measles -   | 72/3105   | 145/9773 | 4.88E-06 | 6.38E-05 | 2.43E-05 | Stat1/Casp  | 72    |
| mmu0462 | Toll-like r | 55/3105   | 104/9773 | 5.91E-06 | 7.44E-05 | 2.84E-05 | Ly96/Stat1  | 55    |
| mmu0414 | Endocytos   | 120/3105  | 270/9773 | 6.58E-06 | 7.99E-05 | 3.04E-05 | Arfgef1/Sr  | 120   |
| mmu0516 | Human pa    | 153/3105  | 359/9773 | 7.06E-06 | 8.27E-05 | 3.15E-05 | Atp6v1h/S   | 153   |
| mmu0406 | NF-kappa    | 56/3105   | 107/9773 | 7.40E-06 | 8.38E-05 | 3.19E-05 | Ly96/Zap7   | 56    |
| mmu0521 | Prostate c  | 53/3105   | 100/9773 | 7.99E-06 | 8.77E-05 | 3.34E-05 | Bcl2/Creb   | 53    |
| mmu0520 | Chemical    | 104/3105  | 229/9773 | 8.60E-06 | 9.14E-05 | 3.48E-05 | Gsta3/Cox   | 104   |
| mmu0481 | Motor pro   | 92/3105   | 198/9773 | 9.11E-06 | 9.14E-05 | 3.48E-05 | Dnah7b/D    | 92    |
| mmu0493 | Insulin res | 57/3105   | 110/9773 | 9.14E-06 | 9.14E-05 | 3.48E-05 | Prkcq/Slc2  | 57    |
| mmu0401 | Rap1 sign   | 98/3105   | 214/9773 | 1.01E-05 | 9.83E-05 | 3.74E-05 | Ralb/Enah   | 98    |
| mmu0010 | Steroid bi  | 16/3105   | 20/9773  | 1.24E-05 | 0.000117 | 4.46E-05 | Soat1/Hsc   | 16    |
| mmu0514 | Toxoplas    | 56/3105   | 109/9773 | 1.52E-05 | 0.00014  | 5.32E-05 | Ly96/Stat1  | 56    |
| mmu0407 | Phospholi   | 72/3105   | 149/9773 | 1.64E-05 | 0.000146 | 5.58E-05 | Cxcr1/Dgk   | 72    |
| mmu0120 | Carbon m    | 61/3105   | 122/9773 | 1.93E-05 | 0.000168 | 6.40E-05 | Idh1/Rpe/   | 61    |
| mmu0402 | Calcium si  | 112/3105  | 254/9773 | 2.04E-05 | 0.000173 | 6.59E-05 | Erbp4/Plc   | 112   |
| mmu0514 | Chagas di   | 53/3105   | 103/9773 | 2.41E-05 | 0.0002   | 7.61E-05 | Casp8/Tgf   | 53    |
| mmu0060 | Glycosphi   | 14/3105   | 17/9773  | 2.49E-05 | 0.000202 | 7.68E-05 | Gbgt1/B3g   | 14    |
| mmu0402 | cGMP-PK     | 80/3105   | 172/9773 | 3.28E-05 | 0.000259 | 9.87E-05 | Atp1b1/Ci   | 80    |
| mmu0427 | Vascular s  | 69/3105   | 144/9773 | 3.45E-05 | 0.000266 | 0.000101 | Ramp1/Pl    | 69    |
| mmu0493 | Non-alcol   | 76/3105   | 162/9773 | 3.55E-05 | 0.000268 | 0.000102 | Cox5b/Car   | 76    |
| mmu0056 | Ether lipid | 29/3105   | 48/9773  | 3.92E-05 | 0.00029  | 0.00011  | Pla2g4a/A   | 29    |
| mmu0060 | Sphingoli   | 32/3105   | 55/9773  | 4.57E-05 | 0.000331 | 0.000126 | Sgpp2/De    | 32    |
| mmu0491 | Insulin sig | 67/3105   | 140/9773 | 4.67E-05 | 0.000331 | 0.000126 | Rapgef1/F   | 67    |
| mmu0439 | Hippo sig   | 74/3105   | 158/9773 | 4.80E-05 | 0.000333 | 0.000127 | Bmpr2/Fz    | 74    |
| mmu0401 | MAPK sig    | 127/3105  | 299/9773 | 5.04E-05 | 0.000343 | 0.000131 | Il1r1/Erbp  | 127   |
| mmu0466 | TNF signa   | 58/3105   | 118/9773 | 5.75E-05 | 0.000384 | 0.000146 | Il18r1/Cas  | 58    |
| mmu0493 | Alcoholic   | 67/3105   | 141/9773 | 6.18E-05 | 0.000397 | 0.000151 | Ly96/Casp   | 67    |
| mmu0123 | Biosynthe   | 42/3105   | 79/9773  | 6.19E-05 | 0.000397 | 0.000151 | Idh1/Rpe/   | 42    |
| mmu0513 | Yersinia in | 65/3105   | 136/9773 | 6.34E-05 | 0.000399 | 0.000152 | Zap70/Fn    | 65    |
| mmu0451 | ECM-rece    | 46/3105   | 89/9773  | 7.07E-05 | 0.000437 | 0.000167 | Fn1/Lamc    | 46    |
| mmu0513 | Pertussis   | 41/3105   | 77/9773  | 7.21E-05 | 0.000438 | 0.000167 | Ly96/C4bp   | 41    |
| mmu0492 | Oxytocin    | 71/3105   | 153/9773 | 9.74E-05 | 0.000581 | 0.000221 | Pla2g4a/P   | 71    |

|                     |          |          |          |          |          |            |     |
|---------------------|----------|----------|----------|----------|----------|------------|-----|
| mmu0453 Tight junc  | 77/3105  | 169/9773 | 0.000107 | 0.000629 | 0.00024  | Arpc2/Act  | 77  |
| mmu0406 Chemokin    | 86/3105  | 193/9773 | 0.000116 | 0.000666 | 0.000253 | Stat1/Cxcr | 86  |
| mmu0516 Epstein-B   | 99/3105  | 228/9773 | 0.000124 | 0.000701 | 0.000267 | Stat1/Casp | 99  |
| mmu0522 Hepatocel   | 79/3105  | 175/9773 | 0.000128 | 0.000715 | 0.000272 | Gsta3/Fzd  | 79  |
| mmu0522 Small cell  | 47/3105  | 94/9773  | 0.000168 | 0.000908 | 0.000346 | Fn1/Bcl2/F | 47  |
| mmu0541 Viral myoc  | 47/3105  | 94/9773  | 0.000168 | 0.000908 | 0.000346 | Casp8/Cd   | 47  |
| mmu0401 Ras signal  | 101/3105 | 236/9773 | 0.000206 | 0.001092 | 0.000416 | Zap70/Ral  | 101 |
| mmu0502 Pathways    | 189/3105 | 481/9773 | 0.00021  | 0.001096 | 0.000418 | Cox5b/Dn   | 189 |
| mmu0406 FoxO sign   | 62/3105  | 133/9773 | 0.000225 | 0.001157 | 0.00044  | Tgfb2/Bcl2 | 62  |
| mmu0466 Fc epsilon  | 35/3105  | 66/9773  | 0.000265 | 0.001342 | 0.000511 | Pla2g4a/F  | 35  |
| mmu0521 Colorectal  | 44/3105  | 88/9773  | 0.000268 | 0.001342 | 0.000511 | Bcl2/Ralb  | 44  |
| mmu0152 Platinum c  | 41/3105  | 81/9773  | 0.000308 | 0.001517 | 0.000578 | Gsta3/Cas  | 41  |
| mmu0056 Glyceroph   | 49/3105  | 101/9773 | 0.000312 | 0.001517 | 0.000578 | Dgkd/Pla2  | 49  |
| mmu0051 Mucin typ   | 20/3105  | 32/9773  | 0.000332 | 0.001577 | 0.000601 | St6galnac  | 20  |
| mmu0516 Influenza   | 77/3105  | 174/9773 | 0.000334 | 0.001577 | 0.000601 | Stat1/Casp | 77  |
| mmu0421 Ferroptosi  | 24/3105  | 41/9773  | 0.000357 | 0.001653 | 0.000629 | Cp/Slc7a1  | 24  |
| mmu0501 Alzheimer   | 155/3105 | 389/9773 | 0.000365 | 0.001653 | 0.000629 | Cox5b/Ca   | 155 |
| mmu0464 Hematopc    | 46/3105  | 94/9773  | 0.000369 | 0.001653 | 0.000629 | Il1r1/Cd55 | 46  |
| mmu0426 Cardiac m   | 44/3105  | 89/9773  | 0.000369 | 0.001653 | 0.000629 | Cox5b/Tn   | 44  |
| mmu0472 Synaptic v  | 39/3105  | 77/9773  | 0.000421 | 0.001858 | 0.000708 | Atp6v1h/A  | 39  |
| mmu0502 Prion dise  | 113/3105 | 273/9773 | 0.000432 | 0.001884 | 0.000717 | Cox5b/Nd   | 113 |
| mmu0051 N-Glycan    | 29/3105  | 53/9773  | 0.00044  | 0.001895 | 0.000722 | Mgat4a/V   | 29  |
| mmu0514 Leishmani   | 36/3105  | 70/9773  | 0.000476 | 0.002022 | 0.00077  | Stat1/Ptgs | 36  |
| mmu0062 Pyruvate r  | 25/3105  | 44/9773  | 0.000507 | 0.002127 | 0.00081  | Acss2/Pck  | 25  |
| mmu0048 Glutathior  | 37/3105  | 73/9773  | 0.000576 | 0.002386 | 0.000909 | Gsta3/ldh  | 37  |
| mmu0455 Signaling   | 63/3105  | 140/9773 | 0.000657 | 0.00269  | 0.001024 | Bmpr2/Fz   | 63  |
| mmu0415 AMPK sigr   | 58/3105  | 127/9773 | 0.000674 | 0.002706 | 0.001031 | Creb3l1/H  | 58  |
| mmu0516 Hepatitis E | 72/3105  | 164/9773 | 0.000677 | 0.002706 | 0.001031 | Stat1/Casp | 72  |
| mmu0421 Apoptosis   | 61/3105  | 135/9773 | 0.000697 | 0.002757 | 0.00105  | Casp8/Bcl  | 61  |
| mmu0052 Amino su    | 28/3105  | 52/9773  | 0.000775 | 0.002994 | 0.00114  | Uxs1/Cyb   | 28  |
| mmu0201 ABC trans   | 28/3105  | 52/9773  | 0.000775 | 0.002994 | 0.00114  | Abca12/A   | 28  |
| mmu0496 Collecting  | 17/3105  | 27/9773  | 0.000826 | 0.003154 | 0.001201 | Atp6v1g3   | 17  |
| mmu0414 Peroxisom   | 42/3105  | 87/9773  | 0.000925 | 0.003496 | 0.001331 | ldh1/Phyh  | 42  |
| mmu0421 Cellular se | 78/3105  | 182/9773 | 0.000986 | 0.003667 | 0.001396 | Tgfb2/Il1a | 78  |
| mmu0407 Sphingolip  | 57/3105  | 126/9773 | 0.000992 | 0.003667 | 0.001396 | Sgpp2/Bcl  | 57  |
| mmu0022 Arginine t  | 14/3105  | 21/9773  | 0.001065 | 0.003893 | 0.001483 | Glul/Ass1  | 14  |
| mmu0060 Glycosphii  | 11/3105  | 15/9773  | 0.001146 | 0.004135 | 0.001575 | St6galnac  | 11  |
| mmu0326 Virion - E  | 12/3105  | 17/9773  | 0.001155 | 0.004135 | 0.001575 | Fcgr2b/Ne  | 12  |
| mmu0465 Natural kil | 55/3105  | 122/9773 | 0.001331 | 0.004713 | 0.001795 | Zap70/Sh   | 55  |
| mmu0492 Relaxin sig | 58/3105  | 130/9773 | 0.001357 | 0.004756 | 0.001811 | Col3a1/Cr  | 58  |
| mmu0019 Oxidative   | 62/3105  | 141/9773 | 0.001472 | 0.005106 | 0.001945 | Atp6v1h/C  | 62  |
| mmu0521 Pancreatic  | 37/3105  | 76/9773  | 0.001503 | 0.005162 | 0.001966 | Stat1/Ralb | 37  |
| mmu0033 Arginine a  | 28/3105  | 54/9773  | 0.001672 | 0.005685 | 0.002165 | Ckmt1/Ga   | 28  |
| mmu0415 PI3K-Akt s  | 143/3105 | 367/9773 | 0.001768 | 0.005913 | 0.002252 | ErbB4/Fn1  | 143 |
| mmu0523 Central ca  | 34/3105  | 69/9773  | 0.001774 | 0.005913 | 0.002252 | ldh1/Pdk1  | 34  |
| mmu0023 Purine me   | 59/3105  | 134/9773 | 0.001821 | 0.006011 | 0.002289 | Adss/Ak8   | 59  |
| mmu0402 cAMP sigr   | 92/3105  | 224/9773 | 0.001877 | 0.006137 | 0.002337 | Atp1b1/Kc  | 92  |
| mmu0497 Protein di  | 49/3105  | 108/9773 | 0.002014 | 0.006461 | 0.00246  | Col3a1/Cc  | 49  |
| mmu0514 Amoebias    | 49/3105  | 108/9773 | 0.002014 | 0.006461 | 0.00246  | Il1r1/Col3 | 49  |
| mmu0492 Regulatio   | 29/3105  | 57/9773  | 0.002035 | 0.006462 | 0.002461 | Ptgs2/Ptg  | 29  |
| mmu0406 HIF-1 sigr  | 52/3105  | 116/9773 | 0.002065 | 0.006462 | 0.002461 | Bcl2/Pdk1  | 52  |
| mmu0121 Fatty acid  | 31/3105  | 62/9773  | 0.002072 | 0.006462 | 0.002461 | Acadl/Hsc  | 31  |
| mmu0516 Hepatitis C | 71/3105  | 167/9773 | 0.002091 | 0.006462 | 0.002461 | Stat1/Casp | 71  |
| mmu0467 Leukocyte   | 53/3105  | 119/9773 | 0.002238 | 0.006856 | 0.002611 | Ncf2/F11r  | 53  |
| mmu0497 Cholesterc  | 26/3105  | 50/9773  | 0.002296 | 0.006969 | 0.002654 | Cyp27a1/S  | 26  |
| mmu0411 p53 signal  | 36/3105  | 75/9773  | 0.002362 | 0.007062 | 0.002689 | Casp8/Bcl  | 36  |
| mmu0491 Progester   | 43/3105  | 93/9773  | 0.002368 | 0.007062 | 0.002689 | Ccna2/Ccr  | 43  |
| mmu0522 Acute mye   | 34/3105  | 70/9773  | 0.00241  | 0.007126 | 0.002714 | Spi1/Ccna  | 34  |

|                      |          |          |          |          |          |              |     |
|----------------------|----------|----------|----------|----------|----------|--------------|-----|
| mmu0451 Cell adhes   | 75/3105  | 179/9773 | 0.002547 | 0.007464 | 0.002842 | Cd28/Pdcd    | 75  |
| mmu0060 Glycosph     | 16/3105  | 27/9773  | 0.002899 | 0.008423 | 0.003208 | B4galt3/Fc   | 16  |
| mmu0437 Apelin sigl  | 60/3105  | 139/9773 | 0.002938 | 0.008465 | 0.003224 | Ryr3/Plcb2   | 60  |
| mmu0435 TGF-beta     | 49/3105  | 110/9773 | 0.0032   | 0.009107 | 0.003468 | Bmpr2/Inr    | 49  |
| mmu0472 Retrograd    | 65/3105  | 153/9773 | 0.003214 | 0.009107 | 0.003468 | Ndufs1/Nd    | 65  |
| mmu0465 Th17 cell c  | 47/3105  | 105/9773 | 0.003419 | 0.009607 | 0.003658 | Il17f/Zap7   | 47  |
| mmu0002 Citrate cyc  | 18/3105  | 32/9773  | 0.003552 | 0.009819 | 0.003739 | Idh1/Pck1    | 18  |
| mmu0041 beta-Alan    | 18/3105  | 32/9773  | 0.003552 | 0.009819 | 0.003739 | Gad1/Dpy     | 18  |
| mmu0472 Glutamate    | 51/3105  | 116/9773 | 0.003716 | 0.010081 | 0.003839 | Pla2g4a/C    | 51  |
| mmu0493 Cushing s    | 68/3105  | 162/9773 | 0.003732 | 0.010081 | 0.003839 | Fzd5/Pbx1    | 68  |
| mmu0497 Salivary se  | 40/3105  | 87/9773  | 0.003736 | 0.010081 | 0.003839 | Atp1b1/Ry    | 40  |
| mmu0406 Cytokine-r   | 115/3105 | 294/9773 | 0.004096 | 0.010965 | 0.004176 | Il17f/Il1r1  | 115 |
| mmu0492 Adipocyto    | 34/3105  | 72/9773  | 0.004284 | 0.01138  | 0.004334 | Rxrg/Prkcc   | 34  |
| mmu0001 Glycolysis   | 32/3105  | 67/9773  | 0.004431 | 0.011677 | 0.004447 | Acss2/Pck    | 32  |
| mmu0152 EGFR tyros   | 37/3105  | 80/9773  | 0.004582 | 0.011962 | 0.004555 | Bcl2/Bcl2l   | 37  |
| mmu0028 Valine, leu  | 28/3105  | 57/9773  | 0.004609 | 0.011962 | 0.004555 | Aox1/Aox     | 28  |
| mmu0523 PD-L1 exp    | 40/3105  | 88/9773  | 0.004782 | 0.012318 | 0.004691 | Zap70/Sta    | 40  |
| mmu0045 Selenocon    | 11/3105  | 17/9773  | 0.005287 | 0.013516 | 0.005147 | Sephs1/Ky    | 11  |
| mmu0497 Mineral ak   | 27/3105  | 55/9773  | 0.005412 | 0.013731 | 0.005229 | Slc26a9/A    | 27  |
| mmu0034 Histidine r  | 15/3105  | 26/9773  | 0.005545 | 0.013966 | 0.005318 | Hnmt/Hdc     | 15  |
| mmu0472 Cholinergi   | 49/3105  | 113/9773 | 0.006084 | 0.01521  | 0.005792 | Kcnq5/Bcl    | 49  |
| mmu0492 Renin secr   | 35/3105  | 76/9773  | 0.006229 | 0.015327 | 0.005837 | Pde1a/Plc    | 35  |
| mmu0521 Endometri    | 28/3105  | 58/9773  | 0.00625  | 0.015327 | 0.005837 | Egf/Lef1/F   | 28  |
| mmu0051 Various ty   | 22/3105  | 43/9773  | 0.006266 | 0.015327 | 0.005837 | Mgat4a/B     | 22  |
| mmu0493 Type II dia  | 24/3105  | 48/9773  | 0.006373 | 0.015477 | 0.005894 | Cacna1b/I    | 24  |
| mmu0064 Propanoat    | 17/3105  | 31/9773  | 0.006462 | 0.015581 | 0.005933 | Acss2/Acc    | 17  |
| mmu0452 Adherens     | 41/3105  | 92/9773  | 0.006583 | 0.015762 | 0.006002 | Nectin4/N    | 41  |
| mmu0463 JAK-STAT     | 70/3105  | 171/9773 | 0.006737 | 0.016017 | 0.006099 | Stat1/Aox    | 70  |
| mmu0461 Antigen p    | 39/3105  | 87/9773  | 0.007041 | 0.01653  | 0.006295 | Hspa5/Pdi    | 39  |
| mmu0534 Primary in   | 19/3105  | 36/9773  | 0.00705  | 0.01653  | 0.006295 | Zap70/Ptp    | 19  |
| mmu0152 Antifolate   | 16/3105  | 29/9773  | 0.007564 | 0.017615 | 0.006708 | Fpgs/Il1b/   | 16  |
| mmu0510 Bacterial ir | 35/3105  | 77/9773  | 0.007992 | 0.018484 | 0.007039 | Fn1/Arpc2    | 35  |
| mmu0516 Human cy     | 99/3105  | 254/9773 | 0.008254 | 0.018795 | 0.007157 | Il1r1/Casp   | 99  |
| mmu0104 Biosynthe    | 18/3105  | 34/9773  | 0.008292 | 0.018795 | 0.007157 | Hsd17b12     | 18  |
| mmu0501 Parkinson    | 106/3105 | 274/9773 | 0.008292 | 0.018795 | 0.007157 | Cox5b/Nd     | 106 |
| mmu0056 Inositol pf  | 33/3105  | 72/9773  | 0.008472 | 0.018973 | 0.007225 | Plcd4/Pik3   | 33  |
| mmu0516 Kaposi sar   | 88/3105  | 223/9773 | 0.008482 | 0.018973 | 0.007225 | Stat1/Casp   | 88  |
| mmu0407 Phosphati    | 42/3105  | 96/9773  | 0.008826 | 0.019546 | 0.007443 | Plcd4/Dgk    | 42  |
| mmu0065 Butanoate    | 15/3105  | 27/9773  | 0.008853 | 0.019546 | 0.007443 | Gad1/Hmg     | 15  |
| mmu0497 Gastric aci  | 34/3105  | 75/9773  | 0.009304 | 0.02041  | 0.007772 | Slc9a4/Atp   | 34  |
| mmu0532 Inflammat    | 29/3105  | 62/9773  | 0.009389 | 0.020463 | 0.007792 | Il17f/Il18r1 | 29  |
| mmu0051 Other glyc   | 11/3105  | 18/9773  | 0.009721 | 0.021051 | 0.008016 | Gba/Mank     | 11  |
| mmu0516 Human T-     | 96/3105  | 247/9773 | 0.010029 | 0.021582 | 0.008219 | Il1r1/Elk4/  | 96  |
| mmu0038 Tryptopha    | 25/3105  | 52/9773  | 0.010121 | 0.021641 | 0.008241 | Aox1/Aox     | 25  |
| mmu0491 Insulin sec  | 38/3105  | 86/9773  | 0.010238 | 0.021756 | 0.008285 | Atp1b1/Ra    | 38  |
| mmu0522 Chronic m    | 34/3105  | 76/9773  | 0.011794 | 0.024885 | 0.009477 | Tgfb2/Bcl2   | 34  |
| mmu0401 ErbB signa   | 37/3105  | 84/9773  | 0.011857 | 0.024885 | 0.009477 | Nck2/Erbk    | 37  |
| mmu0466 T cell rece  | 51/3105  | 122/9773 | 0.012016 | 0.025063 | 0.009544 | Zap70/Nc     | 51  |
| mmu0090 Terpenoid    | 13/3105  | 23/9773  | 0.012117 | 0.025121 | 0.009566 | Fdps/Pmv     | 13  |
| mmu0492 GnRH secr    | 29/3105  | 63/9773  | 0.012213 | 0.025166 | 0.009584 | Kcnj3/Plck   | 29  |
| mmu0053 Glycosami    | 9/3105   | 14/9773  | 0.012415 | 0.025428 | 0.009683 | B3gnt7/B4    | 9   |
| mmu0406 Viral prote  | 41/3105  | 95/9773  | 0.012533 | 0.025517 | 0.009717 | Il18r1/Il18  | 41  |
| mmu0437 VEGF sign    | 27/3105  | 58/9773  | 0.012874 | 0.026055 | 0.009922 | Pla2g4a/P    | 27  |
| mmu0523 Choline m    | 42/3105  | 98/9773  | 0.0133   | 0.026758 | 0.01019  | Dgkd/Pla2    | 42  |
| mmu0051 Other type   | 21/3105  | 43/9773  | 0.014352 | 0.028704 | 0.01093  | Colgalt2/E   | 21  |
| mmu0152 Endocrine    | 40/3105  | 93/9773  | 0.014439 | 0.02871  | 0.010933 | Bcl2/E2f1/   | 40  |
| mmu0465 Th1 and T    | 38/3105  | 88/9773  | 0.015666 | 0.030828 | 0.01174  | Zap70/Sta    | 38  |
| mmu0031 Lysine dec   | 29/3105  | 64/9773  | 0.015686 | 0.030828 | 0.01174  | Colgalt2/S   | 29  |

|                                |          |          |          |          |          |             |     |
|--------------------------------|----------|----------|----------|----------|----------|-------------|-----|
| mmu0421 Necroptosis            | 70/3105  | 177/9773 | 0.016532 | 0.032303 | 0.012301 | Stat1/Casp  | 70  |
| mmu0521 Bladder cancer         | 20/3105  | 41/9773  | 0.016927 | 0.032888 | 0.012524 | E2f1/Src/N  | 20  |
| mmu0005 Fructose and           | 18/3105  | 36/9773  | 0.017107 | 0.033048 | 0.012585 | Aldob/Akr   | 18  |
| mmu0414 Protein processing     | 69/3105  | 175/9773 | 0.01853  | 0.035595 | 0.013555 | Ugg1/Dn     | 69  |
| mmu0522 Gastric cancer         | 60/3105  | 150/9773 | 0.01954  | 0.037324 | 0.014213 | Fzd5/Bcl2   | 60  |
| mmu0414 Autophagy              | 66/3105  | 167/9773 | 0.019808 | 0.037625 | 0.014328 | Atg9a/Bcl   | 66  |
| mmu0025 Alanine, aspartate     | 19/3105  | 39/9773  | 0.019983 | 0.037746 | 0.014374 | Glul/Adss   | 19  |
| mmu0123 Nucleotide metabolism  | 36/3105  | 84/9773  | 0.020829 | 0.03891  | 0.014817 | Dtymk/Ad    | 36  |
| mmu0466 B cell receptor        | 36/3105  | 84/9773  | 0.020829 | 0.03891  | 0.014817 | Fcgr2b/Va   | 36  |
| mmu0462 NOD-like receptor      | 83/3105  | 216/9773 | 0.02136  | 0.039686 | 0.015113 | Stat1/Casp  | 83  |
| mmu0496 Proximal tubule        | 12/3105  | 22/9773  | 0.022283 | 0.041175 | 0.01568  | Atp1b1/Pc   | 12  |
| mmu0027 Cysteine and           | 25/3105  | 55/9773  | 0.022834 | 0.041965 | 0.015981 | Kyat1/Phg   | 25  |
| mmu0472 GABAergic              | 38/3105  | 90/9773  | 0.023208 | 0.042184 | 0.016064 | Plcl1/Trak  | 38  |
| mmu0491 GnRH signaling         | 38/3105  | 90/9773  | 0.023208 | 0.042184 | 0.016064 | Pla2g4a/P   | 38  |
| mmu0413 Mitophagy              | 42/3105  | 101/9773 | 0.023325 | 0.042184 | 0.016064 | Atg9a/Rak   | 42  |
| mmu0461 Renin-angiotensin      | 18/3105  | 37/9773  | 0.023615 | 0.042481 | 0.016177 | Ctsa/Cpa3   | 18  |
| mmu0491 Prolactin signaling    | 32/3105  | 74/9773  | 0.024618 | 0.043823 | 0.016688 | Stat1/Tnfr  | 32  |
| mmu0491 Thyroid hormone        | 32/3105  | 74/9773  | 0.024618 | 0.043823 | 0.016688 | Atp1b1/H    | 32  |
| mmu0471 Circadian rhythm       | 41/3105  | 99/9773  | 0.026647 | 0.047187 | 0.017969 | Kcnj3/Ryr3  | 41  |
| mmu0050 Starch and             | 17/3105  | 35/9773  | 0.027937 | 0.04894  | 0.018637 | Ganc/Amy    | 17  |
| mmu0059 alpha-Linolenic acid   | 13/3105  | 25/9773  | 0.028069 | 0.04894  | 0.018637 | Pla2g4a/P   | 13  |
| mmu0475 Inflammation           | 52/3105  | 130/9773 | 0.028199 | 0.04894  | 0.018637 | Il1r1/Pla2g | 52  |
| mmu0492 Parathyroid hormone    | 47/3105  | 116/9773 | 0.028213 | 0.04894  | 0.018637 | Bcl2/Rxrg   | 47  |
| mmu0522 Non-small cell lung    | 31/3105  | 72/9773  | 0.028467 | 0.04913  | 0.018709 | Rxrg/E2f1   | 31  |
| mmu0013 Ubiquinol              | 7/3105   | 11/9773  | 0.029661 | 0.050933 | 0.019395 | Coq3/Coq    | 7   |
| mmu0497 Fat digestion          | 20/3105  | 43/9773  | 0.030256 | 0.051694 | 0.019685 | Slc27a4/Pl  | 20  |
| mmu0454 Gap junctions          | 36/3105  | 86/9773  | 0.030563 | 0.051956 | 0.019785 | Plcb2/Plck  | 36  |
| mmu0472 Long-term potentiation | 29/3105  | 67/9773  | 0.030973 | 0.052133 | 0.019852 | Plcb2/Plck  | 29  |
| mmu0494 Type I diabetes        | 29/3105  | 67/9773  | 0.030973 | 0.052133 | 0.019852 | Cd28/Ptpr   | 29  |
| mmu0125 Biosynthesis           | 18/3105  | 38/9773  | 0.031836 | 0.053292 | 0.020294 | Uxs1/Uap    | 18  |
| mmu0059 Arachidonic acid       | 37/3105  | 89/9773  | 0.031975 | 0.053292 | 0.020294 | Pla2g4a/P   | 37  |
| mmu0492 Aldosterone            | 42/3105  | 103/9773 | 0.032815 | 0.054424 | 0.020725 | Atp1b1/Ci   | 42  |
| mmu0491 Thyroid hormone        | 48/3105  | 120/9773 | 0.033956 | 0.056043 | 0.021342 | Stat1/Plcd  | 48  |
| mmu0492 Glucagon               | 42/3105  | 104/9773 | 0.038558 | 0.063333 | 0.024117 | Creb3l1/P   | 42  |
| mmu0056 Glycerolipids          | 27/3105  | 63/9773  | 0.041542 | 0.067906 | 0.025859 | Mogat1/D    | 27  |
| mmu0514 African trypanosome    | 18/3105  | 39/9773  | 0.041996 | 0.0682   | 0.025971 | Plcb2/Il1b  | 18  |
| mmu0521 Glioma - brain         | 31/3105  | 74/9773  | 0.042124 | 0.0682   | 0.025971 | E2f1/Shc1   | 31  |
| mmu0501 Huntingtin             | 112/3105 | 308/9773 | 0.046013 | 0.074144 | 0.028235 | Cox5b/Dn    | 112 |
| mmu0006 Fatty acid             | 14/3105  | 29/9773  | 0.046629 | 0.074782 | 0.028477 | Hsd17b12    | 14  |
| mmu0492 Cortisol synthesis     | 30/3105  | 72/9773  | 0.048416 | 0.076923 | 0.029293 | Pbx1/Kcnk   | 30  |
| mmu0521 Melanoma               | 30/3105  | 72/9773  | 0.048416 | 0.076923 | 0.029293 | E2f1/Pdgr   | 30  |
| mmu0491 Estrogen signaling     | 52/3105  | 134/9773 | 0.049387 | 0.077974 | 0.029693 | Bcl2/Kcnj3  | 52  |
| mmu0521 Thyroid cancer         | 17/3105  | 37/9773  | 0.049536 | 0.077974 | 0.029693 | Rxrg/Tpm    | 17  |
| mmu0493 Growth hormone         | 46/3105  | 117/9773 | 0.049906 | 0.078194 | 0.029777 | Stat1/Creb  | 46  |
| mmu0005 Galactose              | 15/3105  | 32/9773  | 0.052739 | 0.082254 | 0.031323 | Ganc/B4g    | 15  |
| mmu0026 Glycine, serine        | 18/3105  | 40/9773  | 0.054294 | 0.084293 | 0.032099 | Gatm/Phg    | 18  |
| mmu0439 Hippo signaling        | 13/3105  | 27/9773  | 0.055493 | 0.085763 | 0.032659 | Rassf2/Mc   | 13  |
| mmu0522 Breast cancer          | 56/3105  | 147/9773 | 0.05977  | 0.091954 | 0.035017 | Fzd5/E2f1   | 56  |
| mmu0326 Virion - HIV           | 6/3105   | 10/9773  | 0.061573 | 0.094301 | 0.03591  | Cd209a/C    | 6   |
| mmu0514 Malaria - Plasmodium   | 24/3105  | 57/9773  | 0.064355 | 0.098119 | 0.037364 | Tgfb2/Il1b  | 24  |
| mmu0533 Graft-versus-host      | 25/3105  | 60/9773  | 0.067464 | 0.102401 | 0.038995 | Cd28/Il1a   | 25  |
| mmu0007 Fatty acid             | 22/3105  | 52/9773  | 0.070833 | 0.107037 | 0.04076  | Acadl/Hac   | 22  |
| mmu0461 Complement             | 37/3105  | 94/9773  | 0.07163  | 0.107763 | 0.041037 | Cd55b/C4    | 37  |
| mmu0491 Melanogenesis          | 39/3105  | 100/9773 | 0.074855 | 0.112093 | 0.042685 | Fzd5/Creb   | 39  |
| mmu0303 DNA replication        | 16/3105  | 36/9773  | 0.075168 | 0.112093 | 0.042685 | Mcm3/Pri    | 16  |
| mmu0503 Morphine               | 36/3105  | 92/9773  | 0.080823 | 0.119622 | 0.045553 | Cacna1b/I   | 36  |
| mmu0421 Longevity              | 25/3105  | 61/9773  | 0.080921 | 0.119622 | 0.045553 | Foxa2/Fox   | 25  |
| mmu0497 Pancreatic             | 44/3105  | 115/9773 | 0.08182  | 0.120428 | 0.045859 | Sctr/Atp1k  | 44  |

|                      |          |          |          |          |          |            |     |
|----------------------|----------|----------|----------|----------|----------|------------|-----|
| mmu0472 Neurotro     | 46/3105  | 121/9773 | 0.084221 | 0.123427 | 0.047002 | Bcl2/Psen  | 46  |
| mmu0056 Glycosylp    | 12/3105  | 26/9773  | 0.088479 | 0.128634 | 0.048984 | Pgap1/Pig  | 12  |
| mmu0121 2-Oxocar     | 15/3105  | 34/9773  | 0.08853  | 0.128634 | 0.048984 | Idh1/Aco1  | 15  |
| mmu0472 Seroton      | 51/3105  | 136/9773 | 0.089413 | 0.129364 | 0.049262 | Pla2g4a/P  | 51  |
| mmu0465 IL-17 sign   | 36/3105  | 93/9773  | 0.09285  | 0.133767 | 0.050939 | Il17f/Casp | 36  |
| mmu0053 Glycosami    | 10/3105  | 21/9773  | 0.094822 | 0.135459 | 0.051584 | Hpse/Gusl  | 10  |
| mmu0077 Pantothen    | 10/3105  | 21/9773  | 0.094822 | 0.135459 | 0.051584 | Dpyd/Aldf  | 10  |
| mmu0501 Amyotrop     | 131/3105 | 375/9773 | 0.100125 | 0.142438 | 0.054241 | Cox5b/Dn   | 131 |
| mmu0063 Glyoxylate   | 14/3105  | 32/9773  | 0.10434  | 0.147202 | 0.056055 | Glul/Acss2 | 14  |
| mmu0421 Apoptosis    | 14/3105  | 32/9773  | 0.10434  | 0.147202 | 0.056055 | Casp8/Bol  | 14  |
| mmu0415 mTOR sig     | 58/3105  | 158/9773 | 0.105166 | 0.14758  | 0.056199 | Atp6v1h/F  | 58  |
| mmu0467 Intestinal i | 18/3105  | 43/9773  | 0.105476 | 0.14758  | 0.056199 | Cd28/Pigr  | 18  |
| mmu0411 Oocyte m     | 46/3105  | 123/9773 | 0.106409 | 0.148275 | 0.056464 | Cdc20/Rp   | 46  |
| mmu0521 Basal cell   | 25/3105  | 63/9773  | 0.112948 | 0.156744 | 0.059689 | Fzd5/Bmp   | 25  |
| mmu0497 Carbohydr    | 20/3105  | 49/9773  | 0.114523 | 0.158284 | 0.060275 | Atp1b1/Pl  | 20  |
| mmu0098 Drug met     | 28/3105  | 72/9773  | 0.120945 | 0.166483 | 0.063398 | Gsta3/Aox  | 28  |
| mmu0520 Chemical     | 81/3105  | 228/9773 | 0.12348  | 0.169287 | 0.064465 | Paqr8/Gst  | 81  |
| mmu0434 Hedgehog     | 23/3105  | 58/9773  | 0.125551 | 0.171435 | 0.065283 | lhh/Bcl2/C | 23  |
| mmu0043 Taurine ar   | 10/3105  | 22/9773  | 0.126145 | 0.171557 | 0.06533  | Fmo1/Fmo   | 10  |
| mmu0421 Longevity    | 34/3105  | 90/9773  | 0.132815 | 0.179909 | 0.06851  | Creb3l1/F  | 34  |
| mmu0471 Thermoge     | 84/3105  | 238/9773 | 0.133576 | 0.180221 | 0.068629 | Cox5b/Nd   | 84  |
| mmu0091 Nitrogen r   | 8/3105   | 17/9773  | 0.137672 | 0.185014 | 0.070454 | Glul/Car1  | 8   |
| mmu0003 Pentose p    | 14/3105  | 34/9773  | 0.159534 | 0.213549 | 0.081321 | Rpe/Aldol  | 14  |
| mmu0051 Mannose      | 10/3105  | 23/9773  | 0.162328 | 0.216437 | 0.08242  | B4galt3/P  | 10  |
| mmu0073 Thiamine     | 7/3105   | 15/9773  | 0.167019 | 0.221822 | 0.084471 | Ak8/Ak1/A  | 7   |
| mmu0473 Long-tern    | 23/3105  | 60/9773  | 0.169098 | 0.222842 | 0.084859 | Pla2g4a/P  | 23  |
| mmu0533 Allograft r  | 23/3105  | 60/9773  | 0.169098 | 0.222842 | 0.084859 | Cd28/Cd4   | 23  |
| mmu0326 Virion - FI  | 5/3105   | 10/9773  | 0.182176 | 0.239149 | 0.091069 | Cd209a/C   | 5   |
| mmu0036 Phenylalar   | 9/3105   | 21/9773  | 0.193485 | 0.253019 | 0.096351 | Got1l1/Gc  | 9   |
| mmu0491 Ovarian st   | 24/3105  | 64/9773  | 0.195649 | 0.254869 | 0.097055 | Pla2g4a/P  | 24  |
| mmu0098 Metabolis    | 28/3105  | 76/9773  | 0.202124 | 0.262298 | 0.099884 | Gsta3/Gst  | 28  |
| mmu0411 Cell cycle   | 55/3105  | 157/9773 | 0.21132  | 0.272917 | 0.103928 | Mcm3/Orc   | 55  |
| mmu0472 Dopamine     | 48/3105  | 136/9773 | 0.211912 | 0.272917 | 0.103928 | Cacna1b/f  | 48  |
| mmu0024 Pyrimidin    | 21/3105  | 56/9773  | 0.215915 | 0.277023 | 0.105492 | Dtymk/Up   | 21  |
| mmu0531 Asthma -     | 10/3105  | 25/9773  | 0.247211 | 0.315985 | 0.120328 | Fcer1g/Cc  | 10  |
| mmu0431 Wnt signa    | 60/3105  | 175/9773 | 0.259611 | 0.33059  | 0.12589  | Fzd5/Lgr6  | 60  |
| mmu0343 Mismatch     | 9/3105   | 23/9773  | 0.290106 | 0.368044 | 0.140153 | Rpa2/Rfc5  | 9   |
| mmu0497 Vitamin di   | 10/3105  | 26/9773  | 0.294463 | 0.372184 | 0.141729 | Slc19a3/Sl | 10  |
| mmu0496 Aldosterol   | 14/3105  | 38/9773  | 0.303866 | 0.382646 | 0.145714 | Atp1b1/At  | 14  |
| mmu0341 Base excis   | 17/3105  | 47/9773  | 0.306409 | 0.384425 | 0.146391 | Parp1/Mu   | 17  |
| mmu0503 Amphetar     | 24/3105  | 69/9773  | 0.336507 | 0.41971  | 0.159828 | Creb3l1/P  | 24  |
| mmu0012 Primary bi   | 7/3105   | 18/9773  | 0.337015 | 0.41971  | 0.159828 | Cyp27a1/C  | 7   |
| mmu0517 Human im     | 80/3105  | 241/9773 | 0.338237 | 0.41971  | 0.159828 | Casp8/Ap   | 80  |
| mmu0053 Glycosami    | 8/3105   | 21/9773  | 0.340286 | 0.420717 | 0.160211 | Chpf2/Chs  | 8   |
| mmu0495 Maturity o   | 10/3105  | 27/9773  | 0.343783 | 0.422718 | 0.160973 | Foxa2/Hnf  | 10  |
| mmu0344 Homolog      | 15/3105  | 42/9773  | 0.344391 | 0.422718 | 0.160973 | Rad51/Rac  | 15  |
| mmu0520 Viral carc   | 75/3105  | 228/9773 | 0.380469 | 0.463962 | 0.176679 | Casp8/Sp   | 75  |
| mmu0098 Drug met     | 32/3105  | 95/9773  | 0.380722 | 0.463962 | 0.176679 | Gsta3/Upp  | 32  |
| mmu0035 Tyrosine n   | 14/3105  | 40/9773  | 0.386672 | 0.469531 | 0.1788   | Aox1/Aox   | 14  |
| mmu0326 Virion - H   | 4/3105   | 10/9773  | 0.398121 | 0.481712 | 0.183438 | Pilra/Nect | 4   |
| mmu0124 Biosynthe    | 50/3105  | 152/9773 | 0.412219 | 0.497002 | 0.189261 | Kmo/Adss   | 50  |
| mmu0433 Notch sig    | 21/3105  | 63/9773  | 0.441424 | 0.530332 | 0.201953 | Ncstn/Pse  | 21  |
| mmu0079 Folate bio   | 9/3105   | 26/9773  | 0.449734 | 0.538414 | 0.205031 | Fpgs/Alpl  | 9   |
| mmu0462 Cytosolic    | 127/3105 | 82/9773  | 0.451986 | 0.539211 | 0.205334 | Casp8/Ain  | 27  |
| mmu0497 Bile secret  | 33/3105  | 101/9773 | 0.459785 | 0.546597 | 0.208147 | Sctr/Atp1k | 33  |
| mmu0521 Renal cell   | 23/3105  | 70/9773  | 0.467162 | 0.553433 | 0.21075  | Tgfb2/Rap  | 23  |
| mmu0342 Nucleotid    | 19/3105  | 58/9773  | 0.484981 | 0.572547 | 0.218029 | Ercc5/Xpa  | 19  |
| mmu0076 Nicotinate   | 14/3105  | 43/9773  | 0.513152 | 0.602756 | 0.229532 | Aox1/Aox   | 14  |

|                      |          |          |          |          |          |            |     |
|----------------------|----------|----------|----------|----------|----------|------------|-----|
| mmu0520 Transcript   | 72/3105  | 226/9773 | 0.514115 | 0.602756 | 0.229532 | Elk4/Rxrg/ | 72  |
| mmu0501 Spinocere    | 45/3105  | 141/9773 | 0.517304 | 0.60441  | 0.230162 | Psmd1/Ps   | 45  |
| mmu0517 Coronavir    | 106/3105 | 334/9773 | 0.526661 | 0.613236 | 0.233523 | Stat1/Rpl3 | 106 |
| mmu0462 RIG-I-like   | 23/3105  | 73/9773  | 0.563509 | 0.653902 | 0.249009 | Casp8/Tar  | 23  |
| mmu0006 Fatty acid   | 6/3105   | 19/9773  | 0.592748 | 0.683167 | 0.260153 | Acs11/Acs1 | 6   |
| mmu0078 Lipoic acid  | 6/3105   | 19/9773  | 0.592748 | 0.683167 | 0.260153 | Acsm1/Dl   | 6   |
| mmu0503 Nicotine a   | 12/3105  | 40/9773  | 0.652862 | 0.749909 | 0.285569 | Cacna1b/C  | 12  |
| mmu0461 Neutrophil   | 64/3105  | 209/9773 | 0.665874 | 0.76228  | 0.29028  | Ncf2/Fcgr  | 64  |
| mmu0498 Cobalamir    | 5/3105   | 17/9773  | 0.670694 | 0.765222 | 0.2914   | Prdx1/Mrr  | 5   |
| mmu0496 Vasopress    | 13/3105  | 44/9773  | 0.678666 | 0.771727 | 0.293878 | Creb3l1/C  | 13  |
| mmu0503 Cocaine a    | 14/3105  | 48/9773  | 0.701864 | 0.795445 | 0.30291  | Gpsm1/Cr   | 14  |
| mmu0346 Fanconi ar   | 15/3105  | 52/9773  | 0.722837 | 0.816494 | 0.310925 | Rad51/Rp   | 15  |
| mmu0306 Protein ex   | 12/3105  | 42/9773  | 0.725349 | 0.816618 | 0.310972 | Hspa5/Imi  | 12  |
| mmu0413 Autophag     | 9/3105   | 32/9773  | 0.731926 | 0.821303 | 0.312756 | Atg9a/Atg  | 9   |
| mmu0532 Autoimmu     | 22/3105  | 76/9773  | 0.740698 | 0.828412 | 0.315463 | Cd28/Cd4   | 22  |
| mmu0325 Viral life c | 18/3105  | 63/9773  | 0.749745 | 0.835782 | 0.31827  | Vps4b/Ma   | 18  |
| mmu0413 SNARE int    | 9/3105   | 33/9773  | 0.767895 | 0.853217 | 0.324909 | Stx6/Vamp  | 9   |
| mmu0067 One carb     | 5/3105   | 19/9773  | 0.771189 | 0.854085 | 0.32524  | Aldh1l1/A  | 5   |
| mmu0496 Endocrine    | 17/3105  | 61/9773  | 0.78467  | 0.866194 | 0.329851 | Atp1b1/Di  | 17  |
| mmu0516 Herpes sir   | 140/3105 | 464/9773 | 0.790168 | 0.869441 | 0.331087 | Stat1/Casp | 140 |
| mmu0053 Glycosami    | 6/3105   | 24/9773  | 0.823569 | 0.900468 | 0.342903 | Hs6st1/Hs  | 6   |
| mmu0520 Chemical     | 25/3105  | 90/9773  | 0.823664 | 0.900468 | 0.342903 | Gsta3/Ptg  | 25  |
| mmu0515 Staphyloc    | 36/3105  | 128/9773 | 0.838249 | 0.913476 | 0.347856 | Fcgr2b/Fc  | 36  |
| mmu0302 RNA polyr    | 8/3105   | 32/9773  | 0.845059 | 0.917955 | 0.349562 | Polr1b/Po  | 8   |
| mmu0059 Linoleic ac  | 14/3105  | 55/9773  | 0.877267 | 0.949907 | 0.361729 | Pla2g4a/P  | 14  |
| mmu0471 Circadian    | 8/3105   | 34/9773  | 0.891127 | 0.961851 | 0.366278 | Npas2/Cry  | 8   |
| mmu0474 Phototran    | 6/3105   | 27/9773  | 0.902362 | 0.970895 | 0.369722 | Sag/Pde6l  | 6   |
| mmu0092 Sulfur met   | 2/3105   | 11/9773  | 0.908807 | 0.974746 | 0.371188 | Suox/Pape  | 2   |
| mmu0086 Porphyrin    | 11/3105  | 47/9773  | 0.921392 | 0.982048 | 0.373969 | Blvra/Cp/  | 11  |
| mmu0305 Proteasom    | 11/3105  | 47/9773  | 0.921392 | 0.982048 | 0.373969 | Psmd1/Ps   | 11  |
| mmu0345 Non-hom      | 2/3105   | 13/9773  | 0.95113  | 1        | 0.380805 | Xrcc5/Polr | 2   |
| mmu0005 Ascorbate    | 6/3105   | 31/9773  | 0.959105 | 1        | 0.380805 | Aldh1b1/A  | 6   |
| mmu0004 Pentose a    | 7/3105   | 36/9773  | 0.966769 | 1        | 0.380805 | Rpe/Akr1a  | 7   |
| mmu0301 RNA degr     | 19/3105  | 83/9773  | 0.971742 | 1        | 0.380805 | Xrn2/Exos  | 19  |
| mmu0408 Neuroacti    | 105/3105 | 390/9773 | 0.985351 | 1        | 0.380805 | Npbwr1/P   | 105 |
| mmu0412 Ubiquitin    | 37/3105  | 154/9773 | 0.986578 | 1        | 0.380805 | Trip12/Ub  | 37  |
| mmu0014 Steroid hc   | 22/3105  | 99/9773  | 0.986767 | 1        | 0.380805 | Hsd17b7/I  | 22  |
| mmu0474 Taste tran   | 19/3105  | 92/9773  | 0.993771 | 1        | 0.380805 | Scn3a/Pde  | 19  |
| mmu0532 Systemic I   | 34/3105  | 150/9773 | 0.994912 | 1        | 0.380805 | Cd28/Ro6   | 34  |
| mmu0302 Basal tran   | 7/3105   | 44/9773  | 0.994945 | 1        | 0.380805 | Gtf2b/Gtf2 | 7   |
| mmu0308 Polycomb     | 17/3105  | 87/9773  | 0.99634  | 1        | 0.380805 | Asxl1/L3m  | 17  |
| mmu0083 Retinol m    | 19/3105  | 102/9773 | 0.999065 | 1        | 0.380805 | Aox1/Aox   | 19  |
| mmu0503 Alcoholism   | 46/3105  | 207/9773 | 0.999182 | 1        | 0.380805 | Creb3l1/P  | 46  |
| mmu0308 ATP-depe     | 26/3105  | 136/9773 | 0.999697 | 1        | 0.380805 | Actr5/Actl | 26  |
| mmu0520 MicroRNA     | 69/3105  | 303/9773 | 0.999827 | 1        | 0.380805 | Bmpr2/Bcl  | 69  |
| mmu0301 mRNA sur     | 17/3105  | 104/9773 | 0.999896 | 1        | 0.380805 | Gle1/Ncbp  | 17  |
| mmu0301 Nucleocyt    | 18/3105  | 118/9773 | 0.999989 | 1        | 0.380805 | Gle1/Nup   | 18  |
| mmu0097 Aminoacy     | 5/3105   | 66/9773  | 1        | 1        | 0.380805 | Farsb/Sep  | 5   |
| mmu0300 Ribosome     | 10/3105  | 125/9773 | 1        | 1        | 0.380805 | Xrn2/Gar1  | 10  |
| mmu0301 Ribosome     | 36/3105  | 265/9773 | 1        | 1        | 0.380805 | Mrps9/Rp   | 36  |
| mmu0304 Spliceosor   | 23/3105  | 260/9773 | 1        | 1        | 0.380805 | Prpf40a/N  | 23  |
